# Supplementary material for: CYP1B1-AS1 regulates CYP1B1 to promote Coxiella burnetii pathogenesis by inhibiting ROS and host cell death.
Source: Research Square preprint supplement (doi:10.21203/rs.3.rs-5390645/v1), 2024-12-11
Supplement: Supplementary file 1 [file Data S1. Total Differentially Expressed (DE) lncRNAs Identified Across Different Infections.xlsx]

## Sheet: Sheet1
		CYP1B1-AS1 regulates CYP1B1 to promote Coxiella burnetii pathogenesis by inhibiting ROS and host cell death.
		Arunima et al. 2024
		Data S1. Total Differentially Expressed (DE) lncRNAs Identified Across Different Infections.

## Sheet: B.subtilis
ENSEMBL ID	ENSEMBL ID with Version	Gene name	Gene start(bp)	Gene end(bp)	Strand	Type	Gene Description	baseMean	log2FoldChange	lfcSE	pvalue	padj	Raw Mock1	Raw Mock2	Raw B.subtilis_A	Raw B.subtilis_B	Raw B.subtilis_C	Raw B.subtilis_D	Norm Mock1	Norm Mock2	Norm B.subtilis_A	Norm B.subtilis_B	Norm B.subtilis_C	Norm B.subtilis_D	Up/Down Regulation
ENSG00000276216	ENSG00000276216.1		145281116	145281462	1	lncRNA	novel transcript	328.388	3.76452	0.243644	3.05e-55	1.55e-51	58	66	743	901	601	566	51.7021	55.2913	785.175	809.525	746.398	635.847	Up Regulated
ENSG00000279602	ENSG00000279602.1		43360033	43361361	-1	lncRNA	TEC	635.462	2.94992	0.2021	8.95e-50	3.03e-46	217	184	1331	1588	1109	1128	193.437	154.146	1406.55	1426.78	1377.3	1267.2	Up Regulated
ENSG00000284669	ENSG00000284669.1		39148281	39172952	1	lncRNA	novel transcript, antisense CSRNP1	545.013	3.23321	0.235921	2.86e-44	5.82e-41	131	145	1050	1252	948	1053	116.776	121.473	1109.6	1124.89	1177.35	1182.95	Up Regulated
ENSG00000271614	ENSG00000271614.1	ATP2B1-AS1	89708959	89712590	1	lncRNA	ATP2B1 antisense RNA 1 [Source:HGNC Symbol;Acc:HGNC:27883]	727.437	2.92817	0.240331	1.04e-35	1.63e-32	336	365	2288	2518	1975	2087	299.516	305.778	2417.87	2262.36	2452.81	2344.55	Up Regulated
ENSG00000285646	ENSG00000285646.1		11907940	11914298	1	lncRNA	novel transcript	145.483	3.04997	0.2515	3.81e-35	5.53e-32	51	31	269	362	238	274	45.4622	25.9702	284.269	325.247	295.579	307.813	Up Regulated
ENSG00000237499	ENSG00000237499.6	WAKMAR2	137823673	137868233	-1	lncRNA	wound and keratinocyte migration associated lncRNA 2 [Source:HGNC Symbol;Acc:HGNC:53754]	347.462	3.04105	0.253408	1.11e-34	1.41e-31	106	95	743	770	574	678	94.4901	79.586	785.175	691.825	712.866	761.668	Up Regulated
ENSG00000238057	ENSG00000238057.9	ZEB2-AS1	144517978	144521477	1	lncRNA	ZEB2 antisense RNA 1 [Source:HGNC Symbol;Acc:HGNC:37149]	764.864	1.48105	0.127086	1.01e-32	1.07e-29	491	510	1203	1293	993	1104	437.685	427.251	1271.29	1161.73	1233.23	1240.24	Up Regulated
ENSG00000260805	ENSG00000260805.2		212557802	212559731	-1	lncRNA	novel transcript	187.195	2.68252	0.231148	1.64e-32	1.66e-29	73	76	379	523	332	371	65.0734	63.6688	400.513	469.902	412.32	416.783	Up Regulated
ENSG00000260583	ENSG00000260583.1		25582770	25583326	-1	lncRNA	novel transcript, antisense to MRPL39	130.977	4.04597	0.351512	4.75e-32	4.59e-29	28	26	364	439	290	420	24.9596	21.7814	384.662	394.43	360.159	471.83	Up Regulated
ENSG00000254143	ENSG00000254143.1		40161458	40172612	1	lncRNA	novel transcript	48.1383	3.62945	0.321448	1.48e-30	1.16e-27	18	17	178	255	143	163	16.0455	14.2417	188.104	229.111	177.596	183.115	Up Regulated
ENSG00000232295	ENSG00000232295.7		71221457	71328228	-1	lncRNA	novel transcript, antisense OGFRL1	157.114	3.15791	0.282745	2.02e-30	1.48e-27	56	78	540	484	479	477	49.9193	65.3443	570.652	434.861	594.883	535.864	Up Regulated
ENSG00000203395	ENSG00000203395.2		68361214	68365584	-1	lncRNA	novel transcript, antisense to PLEK	112.285	3.28688	0.300122	5.75e-29	3.89e-26	22	19	179	197	125	176	19.6112	15.9172	189.161	176.999	155.241	197.719	Up Regulated
ENSG00000232162	ENSG00000232162.1	USP12-AS1	27162855	27169135	1	lncRNA	USP12 antisense RNA 1 [Source:HGNC Symbol;Acc:HGNC:39961]	59.3748	3.33468	0.316821	3.92e-27	2.21e-24	18	36	238	260	192	226	16.0455	30.1589	251.51	233.603	238.45	253.889	Up Regulated
ENSG00000273329	ENSG00000273329.1		129604548	129611671	-1	lncRNA	novel transcript	421.636	-1.12277	0.108685	3.81e-26	1.98e-23	561	621	207	264	177	222	500.084	520.241	218.75	237.197	219.821	249.396	Down Regulated
ENSG00000255874	ENSG00000255874.2	PRECSIT	110863987	110870330	-1	lncRNA	p53 regulated carcinoma associated Stat3 activating long intergenic non-protein coding transcript [Source:HGNC Symbol;Acc:HGNC:27492]	238.629	2.99433	0.294744	8.48e-26	4.2e-23	151	171	1126	1329	820	1075	134.604	143.255	1189.92	1194.07	1018.38	1207.66	Up Regulated
ENSG00000270640	ENSG00000270640.1		28396815	28397110	1	lncRNA	novel transcript, sense intronic to FOSL2	56.7676	3.90829	0.383829	1.53e-25	7.41e-23	13	20	276	196	166	202	11.5884	16.7549	291.667	176.101	206.16	226.928	Up Regulated
ENSG00000253320	ENSG00000253320.6	MAILR	102864271	103002424	1	lncRNA	macrophage interferon regulatory lncRNA [Source:HGNC Symbol;Acc:HGNC:51558]	703.197	3.42435	0.341625	2.69e-25	1.24e-22	314	401	3183	3531	2483	3778	279.905	335.937	3363.68	3172.51	3083.7	4244.22	Up Regulated
ENSG00000261366	ENSG00000261366.1	MANEA-DT	95575183	95577450	-1	lncRNA	MANEA divergent transcript [Source:HGNC Symbol;Acc:HGNC:43732]	185.891	-1.5521	0.152853	3.47e-25	1.57e-22	375	346	109	125	69	93	334.281	289.861	115.187	112.309	85.693	104.477	Down Regulated
ENSG00000270069	ENSG00000270069.1	MIR222HG	45745210	45770274	-1	lncRNA	miR222/221 cluster host gene [Source:HGNC Symbol;Acc:HGNC:49555]	1547.16	1.40726	0.141716	1.34e-24	5.8e-22	1050	1020	2273	2601	1979	2219	935.987	854.502	2402.02	2336.93	2457.77	2492.84	Up Regulated
ENSG00000270022	ENSG00000270022.3		42615244	42615907	1	lncRNA	RNA, U12 small nuclear	112.251	3.27109	0.332843	4.67e-24	1.94e-21	24	23	205	244	160	167	21.394	19.2682	216.636	219.228	198.708	187.609	Up Regulated
ENSG00000285616	ENSG00000285616.1		40474908	40490430	-1	lncRNA	novel transcript	101.157	3.51425	0.374807	4.34e-22	1.44e-19	14	20	167	198	156	143	12.4798	16.7549	176.479	177.898	193.741	160.647	Up Regulated
ENSG00000257725	ENSG00000257725.1	LINC02399	89947693	89949726	1	lncRNA	long intergenic non-protein coding RNA 2399 [Source:HGNC Symbol;Acc:HGNC:53326]	22.9797	4.32158	0.457109	5.52e-22	1.78e-19	7	8	133	159	100	130	6.23991	6.70198	140.55	142.857	124.193	146.043	Up Regulated
ENSG00000250295	ENSG00000250295.6	RDH10-AS1	73297711	73356461	-1	lncRNA	RDH10 antisense RNA 1 [Source:HGNC Symbol;Acc:HGNC:51658]	324.717	2.28874	0.247623	7.84e-22	2.45e-19	214	265	887	1169	802	1071	190.763	222.003	937.349	1050.32	996.025	1203.17	Up Regulated
ENSG00000262202	ENSG00000262202.4		19112000	19112636	-1	lncRNA	novel transcript	44.5735	3.483	0.370735	1.01e-21	3.11e-19	6	15	87	115	94	104	5.3485	12.5662	91.9384	103.324	116.741	116.834	Up Regulated
ENSG00000230322	ENSG00000230322.1		11168922	11171376	-1	lncRNA	novel transcript	155.373	-2.40794	0.261727	4.77e-21	1.34e-18	135	165	22	35	14	19	120.341	138.228	23.2488	31.4466	17.387	21.3447	Down Regulated
ENSG00000245149	ENSG00000245149.3	RNF139-DT	124462485	124474582	-1	lncRNA	RNF139 divergent transcript [Source:HGNC Symbol;Acc:HGNC:48940]	250.872	-1.43948	0.159116	9.85e-21	2.67e-18	395	435	115	129	109	130	352.109	364.42	121.528	115.903	135.37	146.043	Down Regulated
ENSG00000229951	ENSG00000229951.5	FOSL2-AS1	28384409	28394680	-1	lncRNA	FOSL2 antisense RNA 1 [Source:HGNC Symbol;Acc:HGNC:55784]	22.3227	3.71066	0.416223	1.22e-19	3.1e-17	6	9	90	101	61	89	5.3485	7.53973	95.1087	90.7458	75.7575	99.983	Up Regulated
ENSG00000280228	ENSG00000280228.1		112840328	112844195	1	lncRNA	TEC	51.6099	5.93628	0.659216	1.28e-19	3.2e-17	2	4	176	187	150	148	1.78283	3.35099	185.99	168.015	186.289	166.264	Up Regulated
ENSG00000234883	ENSG00000234883.5	MIR155HG	25561810	25575168	1	lncRNA	MIR155 host gene [Source:HGNC Symbol;Acc:HGNC:35460]	1232.82	1.97719	0.231656	4.63e-19	1.11e-16	805	782	2766	2798	2291	2614	717.59	655.118	2923.01	2513.93	2845.25	2936.58	Up Regulated
ENSG00000269902	ENSG00000269902.1		45764772	45765299	-1	lncRNA	novel transcript	260.57	1.66551	0.192778	4.91e-19	1.16e-16	114	159	381	385	291	371	101.621	133.202	402.627	345.912	361.401	416.783	Up Regulated
ENSG00000274021	ENSG00000274021.1		89351015	89353271	1	lncRNA	novel transcript, antisense to DUSP6	160.571	1.49216	0.175298	8.47e-19	1.98e-16	149	126	329	379	261	325	132.821	105.556	347.675	340.521	324.143	365.107	Up Regulated
ENSG00000275894	ENSG00000275894.1		45345115	45345823	-1	lncRNA	novel transcript, sense intronic to SDC4	61.2729	4.00124	0.472173	1.18e-18	2.69e-16	12	13	212	171	162	150	10.697	10.8907	224.034	153.639	201.192	168.511	Up Regulated
ENSG00000228060	ENSG00000228060.2	PABPC4-AS1	39565052	39573860	1	lncRNA	PABPC4 antisense RNA 1 [Source:HGNC Symbol;Acc:HGNC:40424]	771.3	1.62072	0.196442	6.12e-18	1.34e-15	569	704	1711	1854	1403	1562	507.216	589.774	1808.12	1665.77	1742.42	1754.76	Up Regulated
ENSG00000215417	ENSG00000215417.12	MIR17HG	91347820	91354579	1	lncRNA	miR-17-92a-1 cluster host gene [Source:HGNC Symbol;Acc:HGNC:23564]	1136.13	2.0377	0.248939	8.74e-18	1.89e-15	684	930	3011	3175	2238	2737	609.729	779.105	3181.91	2852.65	2779.43	3074.76	Up Regulated
ENSG00000247373	ENSG00000247373.3	TMED2-DT	123575891	123585115	-1	lncRNA	TMED2 divergent transcript [Source:HGNC Symbol;Acc:HGNC:53346]	90.7621	-1.34962	0.166241	3.27e-17	6.93e-15	208	262	67	91	47	87	185.415	219.49	70.8031	81.7611	58.3706	97.7362	Down Regulated
ENSG00000273338	ENSG00000273338.1		78004346	78004554	-1	lncRNA	novel transcript, antisense to DNAJB4	68.6715	2.31228	0.29433	2.04e-16	3.93e-14	38	22	141	126	125	114	33.8738	18.4304	149.004	113.208	155.241	128.068	Up Regulated
ENSG00000258738	ENSG00000258738.1	BAZ1A-AS1	34874343	34876459	1	lncRNA	BAZ1A antisense RNA 1 [Source:HGNC Symbol;Acc:HGNC:55440]	82.8608	2.02967	0.258085	2.05e-16	3.93e-14	39	40	152	153	123	118	34.7652	33.5099	160.628	137.466	152.757	132.562	Up Regulated
ENSG00000234292	ENSG00000234292.3		91280097	91281142	-1	lncRNA	novel transcript	64.222	1.35265	0.172287	2.72e-16	5.17e-14	75	82	156	209	152	153	66.8562	68.6953	164.855	187.781	188.773	171.881	Up Regulated
ENSG00000279933	ENSG00000279933.1		44183031	44187739	-1	lncRNA	TEC	109.524	-1.81828	0.23192	2.93e-16	5.45e-14	136	142	21	34	18	50	121.233	118.96	22.192	30.5481	22.3547	56.1702	Down Regulated
ENSG00000286113	ENSG00000286113.1		73879046	73882733	1	lncRNA	long intergenic non-protein coding RNA 1617	95.6498	2.33638	0.302663	8.46e-16	1.51e-13	24	19	92	140	71	74	21.394	15.9172	97.2222	125.786	88.1768	83.132	Up Regulated
ENSG00000283341	ENSG00000283341.1		43578889	43840030	1	lncRNA	novel transcript	20.1942	-2.92884	0.380041	9.7e-16	1.71e-13	97	94	9	8	5	16	86.4674	78.7482	9.51087	7.18779	6.20963	17.9745	Down Regulated
ENSG00000230943	ENSG00000230943.2	LINC02541	113616927	113650090	-1	lncRNA	long intergenic non-protein coding RNA 2541 [Source:HGNC Symbol;Acc:HGNC:53574]	282.679	2.35689	0.311747	1.25e-15	2.14e-13	130	130	504	713	498	572	115.884	108.907	532.609	640.612	618.48	642.588	Up Regulated
ENSG00000232518	ENSG00000232518.3		38668202	38671421	-1	lncRNA	novel transcript	13.009	-4.61658	0.597594	2.51e-15	4.08e-13	52	86	4	1	1	2	46.3536	72.0463	4.22705	0.898473	1.24193	2.24681	Down Regulated
ENSG00000258136	ENSG00000258136.1	PRDM4-AS1	107736555	107759968	1	lncRNA	PRDM4 antisense RNA 1 [Source:HGNC Symbol;Acc:HGNC:56186]	35.8366	-1.93832	0.259814	5.95e-15	9.44e-13	129	134	25	35	15	32	114.993	112.258	26.4191	31.4466	18.6289	35.949	Down Regulated
ENSG00000271204	ENSG00000271204.1		130930209	130932206	-1	lncRNA	novel transcript	191.482	1.67482	0.22769	8.09e-15	1.24e-12	106	147	288	375	292	398	94.4901	123.149	304.348	336.928	362.643	447.115	Up Regulated
ENSG00000231856	ENSG00000231856.2		51803838	51813832	1	lncRNA	novel transcript	70.4866	1.72776	0.234475	1.13e-14	1.72e-12	37	44	121	155	96	85	32.9824	36.8609	127.868	139.263	119.225	95.4894	Up Regulated
ENSG00000277895	ENSG00000277895.1		64451591	64452901	-1	lncRNA	novel transcript, antisense to TBK1	50.8979	2.11977	0.2908	1.9e-14	2.83e-12	28	27	102	134	78	98	24.9596	22.6192	107.79	120.395	96.8703	110.094	Up Regulated
ENSG00000251139	ENSG00000251139.2		184813619	184821300	1	lncRNA	novel transcript, antisense to ACSL1	61.5638	3.0548	0.420318	2.04e-14	3e-12	14	14	109	104	86	107	12.4798	11.7285	115.187	93.4412	106.806	120.204	Up Regulated
ENSG00000245556	ENSG00000245556.2	SCAMP1-AS1	78342333	78360507	-1	lncRNA	SCAMP1 antisense RNA 1 [Source:HGNC Symbol;Acc:HGNC:50544]	125.794	-1.03256	0.143723	2.39e-14	3.41e-12	252	272	102	100	93	105	224.637	227.867	107.79	89.8473	115.499	117.958	Down Regulated
ENSG00000274213	ENSG00000274213.1		56914168	56914533	1	lncRNA	novel transcript	43.5801	2.73512	0.372048	2.5e-14	3.55e-12	9	12	41	82	63	57	8.02274	10.053	43.3273	73.6748	78.2414	64.0341	Up Regulated
ENSG00000224467	ENSG00000224467.1	TANK-AS1	161096231	161160224	-1	lncRNA	TANK antisense RNA 1 [Source:HGNC Symbol;Acc:HGNC:40575]	59.7362	2.14966	0.297	2.53e-14	3.57e-12	35	20	103	125	90	102	31.1996	16.7549	108.847	112.309	111.773	114.587	Up Regulated
ENSG00000228804	ENSG00000228804.5		187702313	187733849	1	lncRNA	novel transcript, antisense to RTP2 and BCL6	37.0484	2.18034	0.301141	2.85e-14	3.99e-12	23	26	85	121	91	84	20.5026	21.7814	89.8249	108.715	113.015	94.366	Up Regulated
ENSG00000273319	ENSG00000273319.1		130936464	130939661	1	lncRNA	novel transcript	259.414	1.45066	0.201772	2.89e-14	4.02e-12	174	248	424	559	409	537	155.106	207.761	448.068	502.247	507.948	603.268	Up Regulated
ENSG00000233559	ENSG00000233559.1	LINC00513	130853720	130930682	1	lncRNA	long intergenic non-protein coding RNA 513 [Source:HGNC Symbol;Acc:HGNC:43566]	161.674	1.34282	0.188625	5.58e-14	7.56e-12	114	157	266	321	221	341	101.621	131.526	281.099	288.41	274.466	383.081	Up Regulated
ENSG00000253535	ENSG00000253535.5	ADAM7-AS1	24295814	24912073	-1	lncRNA	ADAM7, ADAMDEC1 and ADAM28 antisense RNA 1 [Source:HGNC Symbol;Acc:HGNC:56152]	205.872	2.4912	0.356318	7.63e-14	1.03e-11	185	241	1095	1216	888	945	164.912	201.897	1157.16	1092.54	1102.83	1061.62	Up Regulated
ENSG00000226380	ENSG00000226380.9	AC016831.1	130876809	130913310	-1	lncRNA	novel transcript	306.85	1.64563	0.235781	1.13e-13	1.45e-11	242	303	728	761	633	744	215.723	253.837	769.324	683.738	786.14	835.813	Up Regulated
ENSG00000269609	ENSG00000269609.5	C10orf95-AS1	102449816	102461106	1	lncRNA	C10orf95 antisense RNA 1 [Source:HGNC Symbol;Acc:HGNC:45238]	114.5	-1.09816	0.158392	2.92e-13	3.58e-11	223	268	100	108	72	82	198.786	224.516	105.676	97.0351	89.4187	92.1192	Down Regulated
ENSG00000254433	ENSG00000254433.1		106085990	106101975	-1	lncRNA	novel transcript	27.1717	-2.12908	0.308222	3.64e-13	4.38e-11	76	80	17	20	7	11	67.7476	67.0198	17.965	17.9695	8.69349	12.3575	Down Regulated
ENSG00000227502	ENSG00000227502.2	MROCKI	113868013	113873390	-1	lncRNA	MARCKS cis regulating lncRNA promoter of cytokines and inflammation [Source:HGNC Symbol;Acc:HGNC:50323]	1323.76	1.89455	0.279834	4.13e-13	4.9e-11	886	790	2285	3213	2096	3112	789.795	661.82	2414.7	2886.8	2603.08	3496.04	Up Regulated
ENSG00000231721	ENSG00000231721.7	LINC-PINT	130791264	131110176	-1	lncRNA	long intergenic non-protein coding RNA, p53 induced transcript [Source:HGNC Symbol;Acc:HGNC:26885]	658.729	1.1105	0.162869	4.66e-13	5.47e-11	545	705	1102	1263	960	1163	485.822	590.612	1164.55	1134.77	1192.25	1306.52	Up Regulated
ENSG00000235527	ENSG00000235527.6	HIPK1-AS1	113924000	113929495	-1	lncRNA	HIPK1 antisense RNA 1 [Source:HGNC Symbol;Acc:HGNC:50576]	227.374	1.7371	0.257643	5.85e-13	6.82e-11	173	146	408	611	383	429	154.215	122.311	431.159	548.967	475.658	481.941	Up Regulated
ENSG00000222041	ENSG00000222041.11	CYTOR	87454781	87636740	1	lncRNA	cytoskeleton regulator RNA [Source:HGNC Symbol;Acc:HGNC:28717]	1180.33	0.663945	0.0974239	8.35e-13	9.47e-11	1455	1641	2128	2301	1764	1880	1297.01	1374.74	2248.79	2067.39	2190.76	2112	Up Regulated
ENSG00000263412	ENSG00000263412.1	NFE2L1-DT	48045141	48048107	-1	lncRNA	NFE2L1 divergent transcript [Source:HGNC Symbol;Acc:HGNC:54812]	27.2806	-1.89166	0.286201	2.79e-12	3.08e-10	53	75	16	18	7	12	47.2451	62.831	16.9082	16.1725	8.69349	13.4809	Down Regulated
ENSG00000241163	ENSG00000241163.7	LINC00877	71943592	72279503	-1	lncRNA	long intergenic non-protein coding RNA 877 [Source:HGNC Symbol;Acc:HGNC:27706]	152.993	1.85223	0.284603	2.82e-12	3.1e-10	111	94	308	399	256	317	98.9472	78.7482	325.483	358.491	317.933	356.119	Up Regulated
ENSG00000255491	ENSG00000255491.2		124811042	124857516	-1	lncRNA	novel transcript	209.973	1.06839	0.1635	3.48e-12	3.72e-10	279	298	527	568	441	485	248.705	249.649	556.914	510.333	547.69	544.851	Up Regulated
ENSG00000261136	ENSG00000261136.1		39782571	39785617	1	lncRNA	novel transcript, antisense to FSIP1	36.4546	-1.98719	0.302791	3.67e-12	3.9e-10	71	71	12	20	10	13	63.2905	59.4801	12.6812	17.9695	12.4193	14.6043	Down Regulated
ENSG00000268471	ENSG00000268471.6	MIR4453HG	152536264	152539263	1	lncRNA	MIR4453 host gene [Source:HGNC Symbol;Acc:HGNC:25288]	84.1019	-1.17421	0.181621	7.06e-12	7.31e-10	152	228	85	81	51	47	135.495	191.006	89.8249	72.7764	63.3383	52.8	Down Regulated
ENSG00000228925	ENSG00000228925.1		46899275	46908678	1	lncRNA	novel transcript, antisense to MCFD2	43.6062	-1.87021	0.290072	7.54e-12	7.77e-10	68	80	21	18	13	10	60.6163	67.0198	22.192	16.1725	16.1451	11.234	Down Regulated
ENSG00000273064	ENSG00000273064.1		68252870	68253848	1	lncRNA	novel transcript	14.3368	-2.85615	0.440032	8.06e-12	8.23e-10	41	52	2	7	7	3	36.5481	43.5629	2.11353	6.28931	8.69349	3.37021	Down Regulated
ENSG00000279722	ENSG00000279722.1		53487607	53489943	-1	lncRNA	novel transcript	23.9008	-2.33152	0.362287	1.06e-11	1.07e-09	40	47	9	6	7	4	35.6566	39.3741	9.51087	5.39084	8.69349	4.49362	Down Regulated
ENSG00000224699	ENSG00000224699.8	LAMTOR5-AS1	110347116	110443817	1	lncRNA	LAMTOR5 antisense RNA 1 [Source:HGNC Symbol;Acc:HGNC:40823]	333.318	-0.680323	0.105776	1.24e-11	1.23e-09	360	403	190	214	149	205	320.91	337.612	200.785	192.273	185.047	230.298	Down Regulated
ENSG00000229124	ENSG00000229124.6	VIM-AS1	17214239	17230018	-1	lncRNA	VIM antisense RNA 1 [Source:HGNC Symbol;Acc:HGNC:44879]	407.522	1.17719	0.186352	1.28e-11	1.26e-09	370	395	714	892	568	750	329.824	330.91	754.529	801.438	705.415	842.554	Up Regulated
ENSG00000245648	ENSG00000245648.1	KLRK1-AS1	10363638	10398506	1	lncRNA	KLRK1 antisense RNA 1 [Source:HGNC Symbol;Acc:HGNC:54868]	38.5453	-1.96933	0.311053	1.35e-11	1.33e-09	83	95	18	23	13	15	73.9875	79.586	19.0217	20.6649	16.1451	16.8511	Down Regulated
ENSG00000285857	ENSG00000285857.1		61527340	61529160	1	lncRNA	novel transcript, antisense to XPO1	56.5796	-1.45894	0.231306	1.75e-11	1.7e-09	116	145	37	35	33	41	103.404	121.473	39.1002	31.4466	40.9836	46.0596	Down Regulated
ENSG00000222043	ENSG00000222043.2		177264359	177265515	1	lncRNA	novel transcript	26.5755	3.04141	0.472518	2e-11	1.94e-09	7	5	50	52	30	46	6.23991	4.18874	52.8382	46.7206	37.2578	51.6766	Up Regulated
ENSG00000238045	ENSG00000238045.9	MVP-DT	29808636	29821252	-1	lncRNA	MVP divergent transcript [Source:HGNC Symbol;Acc:HGNC:56029]	29.6753	-2.59324	0.411004	2.41e-11	2.3e-09	44	53	5	9	4	6	39.2223	44.4006	5.28382	8.08626	4.96771	6.74043	Down Regulated
ENSG00000203804	ENSG00000203804.4	ADAMTSL4-AS1	150560202	150562115	-1	lncRNA	ADAMTSL4 antisense RNA 1 [Source:HGNC Symbol;Acc:HGNC:32041]	484.415	1.13684	0.184628	3.63e-11	3.43e-09	362	431	703	874	537	828	322.693	361.069	742.905	785.266	666.915	930.179	Up Regulated
ENSG00000270133	ENSG00000270133.1		94611906	94618122	-1	lncRNA	novel transcript, sense intronic to C5orf36	22.6396	-2.85773	0.461564	5.38e-11	4.97e-09	50	58	4	5	5	8	44.5708	48.5893	4.22705	4.49237	6.20963	8.98724	Down Regulated
ENSG00000279166	ENSG00000279166.1		144494265	144496878	-1	lncRNA	TEC	2762.31	0.861756	0.140786	5.71e-11	5.23e-09	1946	2696	3373	4092	3061	3471	1734.7	2258.57	3564.46	3676.55	3801.54	3899.34	Up Regulated
ENSG00000274536	ENSG00000274536.6	MIR223HG	66015414	66020426	1	lncRNA	MIR223 host gene [Source:HGNC Symbol;Acc:HGNC:54520]	323.251	-1.25757	0.204993	6.15e-11	5.6e-09	472	463	163	193	103	155	420.748	387.877	172.252	173.405	127.918	174.128	Down Regulated
ENSG00000280061	ENSG00000280061.1		30553956	30558058	1	lncRNA	TEC	51.8525	-1.59874	0.262755	7.65e-11	6.9e-09	78	127	26	37	23	18	69.5305	106.394	27.4758	33.2435	28.5643	20.2213	Down Regulated
ENSG00000228675	ENSG00000228675.1		17679549	17680659	1	lncRNA	novel transcript	13.4641	3.42302	0.542751	8.07e-11	7.22e-09	3	5	43	48	34	32	2.67425	4.18874	45.4408	43.1267	42.2255	35.949	Up Regulated
ENSG00000230923	ENSG00000230923.2	LINC00309	64185078	64205485	-1	lncRNA	long intergenic non-protein coding RNA 309 [Source:HGNC Symbol;Acc:HGNC:25279]	54.4484	2.35238	0.388787	8.43e-11	7.51e-09	20	10	54	97	55	68	17.8283	8.37747	57.0652	87.1519	68.306	76.3915	Up Regulated
ENSG00000203364	ENSG00000203364.2		93147040	93148556	1	lncRNA	novel transcript	11.4366	2.5546	0.423206	1.36e-10	1.18e-08	12	7	45	53	47	53	10.697	5.86423	47.5543	47.6191	58.3706	59.5405	Up Regulated
ENSG00000232671	ENSG00000232671.5	ZNF687-AS1	151279678	151282000	-1	lncRNA	ZNF687 antisense RNA 1 [Source:HGNC Symbol;Acc:HGNC:54048]	20.7524	2.64559	0.435711	1.42e-10	1.23e-08	6	10	46	45	34	53	5.3485	8.37747	48.6111	40.4313	42.2255	59.5405	Up Regulated
ENSG00000261296	ENSG00000261296.1		62274163	62278365	1	lncRNA	novel transcript	63.5653	1.37599	0.233599	1.82e-10	1.54e-08	94	93	243	232	184	169	83.7931	77.9105	256.793	208.446	228.515	189.855	Up Regulated
ENSG00000264247	ENSG00000264247.1	ZNF407-AS1	74590317	74598885	-1	lncRNA	ZNF407 antisense RNA 1 [Source:HGNC Symbol;Acc:HGNC:44331]	368.261	-0.504133	0.0833274	2.1e-10	1.76e-08	587	606	323	399	308	316	523.261	507.675	341.335	358.491	382.513	354.996	Down Regulated
ENSG00000260942	ENSG00000260942.1	CAPN10-DT	240582700	240586699	-1	lncRNA	CAPN10 divergent transcript [Source:HGNC Symbol;Acc:HGNC:48839]	75.5784	-1.39779	0.236517	2.33e-10	1.93e-08	234	258	73	97	56	64	208.591	216.139	77.1437	87.1519	69.5479	71.8979	Down Regulated
ENSG00000257477	ENSG00000257477.1	LINC01154	54428303	54429403	1	lncRNA	long intergenic non-protein coding RNA 1154 [Source:HGNC Symbol;Acc:HGNC:49504]	39.7848	1.80126	0.310197	2.67e-10	2.18e-08	46	53	141	175	132	150	41.0051	44.4006	149.004	157.233	163.934	168.511	Up Regulated
ENSG00000246366	ENSG00000246366.6	LACTB2-AS1	70608577	70663279	1	lncRNA	LACTB2 antisense RNA 1 [Source:HGNC Symbol;Acc:HGNC:27841]	62.2368	-1.37944	0.235911	2.69e-10	2.2e-08	124	157	43	44	38	40	110.536	131.526	45.4408	39.5328	47.1932	44.9362	Down Regulated
ENSG00000254862	ENSG00000254862.5	LGR4-AS1	27471729	27482433	1	lncRNA	LGR4 antisense RNA 1 [Source:HGNC Symbol;Acc:HGNC:40629]	21.4832	-2.19386	0.37173	2.75e-10	2.23e-08	34	49	8	5	5	9	30.3081	41.0496	8.45411	4.49237	6.20963	10.1106	Down Regulated
ENSG00000172965	ENSG00000172965.15	MIR4435-2HG	111006015	111523376	-1	lncRNA	MIR4435-2 host gene [Source:HGNC Symbol;Acc:HGNC:35163]	1231.61	0.455487	0.0757082	2.84e-10	2.3e-08	1627	1840	2074	2230	1659	1837	1450.33	1541.46	2191.73	2003.6	2060.36	2063.69	Up Regulated
ENSG00000273373	ENSG00000273373.1	SLC16A4-AS1	110370154	110373003	1	lncRNA	SLC16A4 antisense RNA 1 [Source:HGNC Symbol;Acc:HGNC:56051]	354.802	-0.878351	0.149263	3.21e-10	2.58e-08	329	399	154	189	121	160	293.276	334.261	162.742	169.811	150.273	179.745	Down Regulated
ENSG00000261188	ENSG00000261188.1	TFIP11-DT	26512503	26514568	1	lncRNA	TFIP11 divergent transcript [Source:HGNC Symbol;Acc:HGNC:55374]	26.7272	-1.47527	0.252917	3.3e-10	2.64e-08	69	69	27	16	22	11	61.5077	57.8046	28.5326	14.3756	27.3224	12.3575	Down Regulated
ENSG00000235724	ENSG00000235724.9	PSMD14-DT	161222785	161308389	-1	lncRNA	PSMD14 divergent transcript [Source:HGNC Symbol;Acc:HGNC:56104]	78.5498	1.4477	0.25099	3.65e-10	2.91e-08	77	96	178	229	160	239	68.639	80.4237	188.104	205.75	198.708	268.494	Up Regulated
ENSG00000224687	ENSG00000224687.1	RASAL2-AS1	178090677	178093984	-1	lncRNA	RASAL2 antisense RNA 1 [Source:HGNC Symbol;Acc:HGNC:44170]	206	-0.762773	0.130629	4.48e-10	3.53e-08	250	254	127	132	92	119	222.854	212.788	134.209	118.599	114.257	133.685	Down Regulated
ENSG00000232131	ENSG00000232131.1	NCOA7-AS1	125797856	125818858	-1	lncRNA	NCOA7 antisense RNA 1 [Source:HGNC Symbol;Acc:HGNC:40954]	24.7205	-2.0462	0.352805	4.55e-10	3.57e-08	47	63	7	16	11	6	41.8966	52.7781	7.39734	14.3756	13.6612	6.74043	Down Regulated
ENSG00000286018	ENSG00000286018.1		29063446	29064368	1	lncRNA	novel transcript, antisense to CCT8	104.045	-1.11058	0.190858	4.89e-10	3.79e-08	122	145	43	64	35	52	108.753	121.473	45.4408	57.5023	43.4674	58.417	Down Regulated
ENSG00000227741	ENSG00000227741.1		160202199	160208869	-1	lncRNA	novel transcript	129.422	1.12942	0.195892	5.06e-10	3.91e-08	60	95	143	160	111	158	53.485	79.586	151.117	143.756	137.854	177.498	Up Regulated
ENSG00000262003	ENSG00000262003.1		909632	911212	1	lncRNA	novel transcript, antisense to NXN	188.726	0.825094	0.139928	6.36e-10	4.88e-08	181	215	293	347	249	268	161.346	180.116	309.632	311.77	309.24	301.072	Up Regulated
ENSG00000255521	ENSG00000255521.1	CD44-DT	35132655	35138951	-1	lncRNA	CD44 divergent transcript [Source:HGNC Symbol;Acc:HGNC:56175]	17.7927	4.68407	0.831733	7.51e-10	5.7e-08	2	7	98	113	114	120	1.78283	5.86423	103.563	101.528	141.58	134.809	Up Regulated
ENSG00000232160	ENSG00000232160.6	RAP2C-AS1	132217053	132432862	1	lncRNA	RAP2C antisense RNA 1 [Source:HGNC Symbol;Acc:HGNC:40957]	93.7212	0.952193	0.166642	8e-10	6.04e-08	76	103	134	169	125	153	67.7476	86.288	141.606	151.842	155.241	171.881	Up Regulated
ENSG00000230910	ENSG00000230910.3	ADGRB3-DT	68627879	68635169	-1	lncRNA	ADGRB3 divergent transcript [Source:HGNC Symbol;Acc:HGNC:55774]	52.2558	-1.84942	0.325142	8.79e-10	6.61e-08	44	68	15	17	7	8	39.2223	56.9668	15.8514	15.274	8.69349	8.98724	Down Regulated
ENSG00000271913	ENSG00000271913.6	TAGAP-AS1	158988178	159088114	1	lncRNA	TAGAP antisense RNA 1 [Source:HGNC Symbol;Acc:HGNC:55239]	220.74	-0.937637	0.164471	8.95e-10	6.71e-08	250	205	82	103	95	92	222.854	171.738	86.6546	92.5428	117.983	103.353	Down Regulated
ENSG00000260572	ENSG00000260572.1	PPM1L-DT	160753428	160755142	-1	lncRNA	PPM1L divergent transcript [Source:HGNC Symbol;Acc:HGNC:55390]	36.5715	-1.4824	0.262144	9.73e-10	7.21e-08	54	65	25	11	10	19	48.1365	54.4536	26.4191	9.88321	12.4193	21.3447	Down Regulated
ENSG00000260135	ENSG00000260135.6	MMP2-AS1	55426797	55462297	-1	lncRNA	MMP2 antisense RNA 1 [Source:HGNC Symbol;Acc:HGNC:53142]	39.4553	2.60548	0.468557	1.16e-09	8.51e-08	19	12	87	85	75	92	16.9369	10.053	91.9384	76.3702	93.1445	103.353	Up Regulated
ENSG00000257747	ENSG00000257747.1	LINC02426	81953719	81993136	1	lncRNA	long intergenic non-protein coding RNA 2426 [Source:HGNC Symbol;Acc:HGNC:53357]	11.8408	4.07424	0.720438	1.48e-09	1.07e-07	5	2	77	67	40	46	4.45708	1.67549	81.3708	60.1977	49.6771	51.6766	Up Regulated
ENSG00000236333	ENSG00000236333.3	TRHDE-AS1	72249964	72276954	-1	lncRNA	TRHDE antisense RNA 1 [Source:HGNC Symbol;Acc:HGNC:27471]	1069.74	-0.698115	0.123341	1.53e-09	1.1e-07	1249	1216	598	740	523	552	1113.38	1018.7	631.944	664.87	649.528	620.119	Down Regulated
ENSG00000257718	ENSG00000257718.1	CPNE8-AS1	38906451	38909592	1	lncRNA	CPNE8 antisense RNA 1 [Source:HGNC Symbol;Acc:HGNC:53937]	80.2384	1.4644	0.26275	1.62e-09	1.16e-07	47	40	101	96	87	124	41.8966	33.5099	106.733	86.2535	108.048	139.302	Up Regulated
ENSG00000270012	ENSG00000270012.1		49273054	49275768	1	lncRNA	novel transcript	64.6818	-1.12222	0.201796	1.74e-09	1.22e-07	117	142	56	45	37	46	104.296	118.96	59.1787	40.4313	45.9513	51.6766	Down Regulated
ENSG00000221949	ENSG00000221949.5	LINC01465	62601751	62603690	-1	lncRNA	long intergenic non-protein coding RNA 1465 [Source:HGNC Symbol;Acc:HGNC:26364]	149.463	0.991666	0.180473	2.33e-09	1.58e-07	138	132	200	285	226	196	123.015	110.583	211.353	256.065	280.675	220.187	Up Regulated
ENSG00000260719	ENSG00000260719.1		29745247	29748299	1	lncRNA	novel transcript, antisense to C16orf54	70.5918	-1.55444	0.283253	2.48e-09	1.67e-07	100	73	19	28	18	25	89.1416	61.1556	20.0785	25.1573	22.3547	28.0851	Down Regulated
ENSG00000274925	ENSG00000274925.1	ZKSCAN2-DT	25257952	25261066	1	lncRNA	ZKSCAN2 divergent transcript [Source:HGNC Symbol;Acc:HGNC:53912]	81.9275	-0.945279	0.171655	2.63e-09	1.76e-07	149	176	60	86	62	56	132.821	147.444	63.4058	77.2687	76.9995	62.9107	Down Regulated
ENSG00000267519	ENSG00000267519.6	MIR23AHG	13823880	13842928	-1	lncRNA	miR-23a/27a/24-2 cluster host gene [Source:HGNC Symbol;Acc:HGNC:27620]	18232.7	1.40465	0.261118	2.77e-09	1.85e-07	12606	11851	24099	35092	21505	31584	11237.2	9928.14	25466.9	31529.2	26707.6	35481.6	Up Regulated
ENSG00000230063	ENSG00000230063.1		212297448	212299579	1	lncRNA	novel transcript, sense intronic to PPP2R5A	19.0128	-2.14455	0.391163	2.9e-09	1.93e-07	35	52	6	8	6	9	31.1996	43.5629	6.34058	7.18779	7.45156	10.1106	Down Regulated
ENSG00000233834	ENSG00000233834.6	MACC1-DT	20217536	20221702	1	lncRNA	MACC1 divergent transcript [Source:HGNC Symbol;Acc:HGNC:55702]	28.6422	3.22539	0.599587	2.92e-09	1.93e-07	10	9	87	96	73	77	8.91416	7.53973	91.9384	86.2535	90.6607	86.5022	Up Regulated
ENSG00000213600	ENSG00000213600.3		50239618	50239984	1	lncRNA	novel transcript, sense intronic to GNAI2	14.3873	-2.60874	0.475553	2.96e-09	1.95e-07	34	47	3	2	4	10	30.3081	39.3741	3.17029	1.79695	4.96771	11.234	Down Regulated
ENSG00000253123	ENSG00000253123.3		37326575	37331991	-1	lncRNA	novel transcript	260.949	1.06485	0.197279	3.37e-09	2.21e-07	367	382	732	722	542	658	327.15	320.019	773.551	648.698	673.124	739.2	Up Regulated
ENSG00000278765	ENSG00000278765.1		48066704	48067293	-1	lncRNA	novel transcript	15.9901	-2.36158	0.431356	3.58e-09	2.32e-07	36	34	4	7	4	5	32.091	28.4834	4.22705	6.28931	4.96771	5.61702	Down Regulated
ENSG00000270362	ENSG00000270362.1	HMGN3-AS1	79233699	79236797	1	lncRNA	HMGN3 antisense RNA 1 [Source:HGNC Symbol;Acc:HGNC:48984]	551.619	-0.607362	0.109763	3.58e-09	2.32e-07	694	748	375	418	317	390	618.643	626.635	396.286	375.562	393.691	438.128	Down Regulated
ENSG00000258086	ENSG00000258086.1	GPR84-AS1	54353792	54466985	1	lncRNA	GPR84, ZNF385A, ITGA5 and GTSF1 antisense RNA 1 [Source:HGNC Symbol;Acc:HGNC:56187]	160.99	1.14053	0.212155	3.6e-09	2.33e-07	271	300	492	587	471	581	241.574	251.324	519.928	527.404	584.948	652.698	Up Regulated
ENSG00000241155	ENSG00000241155.1	ARHGAP31-AS1	119314293	119322760	-1	lncRNA	ARHGAP31 antisense RNA 1 [Source:HGNC Symbol;Acc:HGNC:41235]	26.1735	2.10017	0.389475	4.45e-09	2.82e-07	16	11	58	51	39	58	14.2627	9.21522	61.2923	45.8221	48.4352	65.1575	Up Regulated
ENSG00000251586	ENSG00000251586.1	TET2-AS1	105171354	105178063	-1	lncRNA	TET2 antisense RNA 1 [Source:HGNC Symbol;Acc:HGNC:41125]	64.8449	-1.30011	0.241662	4.61e-09	2.9e-07	105	129	38	36	31	40	93.5987	108.069	40.157	32.345	38.4997	44.9362	Down Regulated
ENSG00000279873	ENSG00000279873.2	LINC01126	43227210	43228855	1	lncRNA	long intergenic non-protein coding RNA 1126 [Source:HGNC Symbol;Acc:HGNC:49275]	71.3704	-1.39652	0.261988	4.78e-09	3e-07	49	75	11	21	24	15	43.6794	62.831	11.6244	18.8679	29.8062	16.8511	Down Regulated
ENSG00000284602	ENSG00000284602.1		25232586	25234775	1	lncRNA	novel transcript	55.1654	-1.18271	0.221195	5.63e-09	3.5e-07	89	92	33	32	18	40	79.336	77.0728	34.8732	28.7512	22.3547	44.9362	Down Regulated
ENSG00000260167	ENSG00000260167.1		30585907	30608593	1	lncRNA	novel transcript, antisense to ZNF689	21.0923	-2.14867	0.402197	6.23e-09	3.82e-07	30	52	6	5	5	11	26.7425	43.5629	6.34058	4.49237	6.20963	12.3575	Down Regulated
ENSG00000285552	ENSG00000285552.1		40463562	40504563	1	lncRNA	novel transcript	23.0607	2.63142	0.482137	6.24e-09	3.82e-07	6	6	47	43	21	26	5.3485	5.02648	49.6679	38.6344	26.0805	29.2085	Up Regulated
ENSG00000229431	ENSG00000229431.1	MED8-AS1	43385113	43389155	1	lncRNA	MED8 antisense RNA 1 [Source:HGNC Symbol;Acc:HGNC:40908]	56.3399	-1.24533	0.237122	7.24e-09	4.39e-07	118	184	41	51	44	56	105.187	154.146	43.3273	45.8221	54.6448	62.9107	Down Regulated
ENSG00000227914	ENSG00000227914.3		673478	685555	-1	lncRNA	novel transcript	9.05384	4.33558	0.810811	7.87e-09	4.73e-07	2	4	71	54	52	60	1.78283	3.35099	75.0302	48.5176	64.5802	67.4043	Up Regulated
ENSG00000230438	ENSG00000230438.6	SERPINB9P1	2851230	2881407	-1	lncRNA	serpin family B member 9 pseudogene 1 [Source:HGNC Symbol;Acc:HGNC:28590]	15.7093	3.2101	0.592936	9.08e-09	5.4e-07	5	3	31	38	29	41	4.45708	2.51324	32.7597	34.142	36.0159	46.0596	Up Regulated
ENSG00000260651	ENSG00000260651.1		102500841	102501319	-1	lncRNA	novel transcript, antisense NFKB1	16.5605	3.0551	0.559322	9.1e-09	5.4e-07	4	4	32	38	32	22	3.56566	3.35099	33.8164	34.142	39.7417	24.7149	Up Regulated
ENSG00000223552	ENSG00000223552.1	CCR5AS	46364391	46407117	-1	lncRNA	CCR5 antisense RNA [Source:HGNC Symbol;Acc:HGNC:54398]	36.4556	2.10979	0.398166	9.88e-09	5.8e-07	9	12	60	44	23	36	8.02274	10.053	63.4058	39.5328	28.5643	40.4426	Up Regulated
ENSG00000261798	ENSG00000261798.1		39788976	39790171	1	lncRNA	novel transcript, antisense to BMP8B	34.6145	-2.20395	0.417197	1.04e-08	6.08e-07	54	54	9	12	5	9	48.1365	45.2384	9.51087	10.7817	6.20963	10.1106	Down Regulated
ENSG00000258858	ENSG00000258858.1		104690091	104691284	-1	lncRNA	novel transcript, antisense to INF2	27.9517	1.67703	0.3233	1.11e-08	6.47e-07	24	31	82	85	62	79	21.394	25.9702	86.6546	76.3702	76.9995	88.749	Up Regulated
ENSG00000263072	ENSG00000263072.6	ZNF213-AS1	3100696	3143734	-1	lncRNA	ZNF213 antisense RNA 1 (head to head) [Source:HGNC Symbol;Acc:HGNC:50505]	122.14	-0.961739	0.18356	1.15e-08	6.65e-07	187	230	91	80	68	92	166.695	192.682	96.1655	71.8779	84.451	103.353	Down Regulated
ENSG00000284966	ENSG00000284966.2		106491147	106521630	1	lncRNA	novel transcript, antisense to EFNB2	10.773	3.09461	0.598155	1.39e-08	7.99e-07	5	8	65	63	41	41	4.45708	6.70198	68.6896	56.6038	50.919	46.0596	Up Regulated
ENSG00000243193	ENSG00000243193.4	PRKAR2B-AS1	107066591	107133733	-1	lncRNA	PRKAR2B antisense RNA 1 [Source:HGNC Symbol;Acc:HGNC:40472]	16.1496	-2.23414	0.430778	1.54e-08	8.8e-07	38	36	5	8	5	5	33.8738	30.1589	5.28382	7.18779	6.20963	5.61702	Down Regulated
ENSG00000278095	ENSG00000278095.1		26273329	26273900	-1	lncRNA	novel transcript, antisense to SSPN	9.47668	3.80615	0.738386	1.59e-08	9.05e-07	7	1	71	64	43	44	6.23991	0.837747	75.0302	57.5023	53.4029	49.4298	Up Regulated
ENSG00000252690	ENSG00000252690.3		82752884	82757208	1	lncRNA	TEC	23.5173	-1.60908	0.31463	1.69e-08	9.52e-07	63	104	22	19	18	22	56.1592	87.1257	23.2488	17.071	22.3547	24.7149	Down Regulated
ENSG00000270426	ENSG00000270426.1		184471924	184472609	-1	lncRNA	novel transcript, sense intronic to IRF2	39.9311	-1.31804	0.257138	1.7e-08	9.57e-07	84	101	27	37	25	24	74.8789	84.6125	28.5326	33.2435	31.0482	26.9617	Down Regulated
ENSG00000280378	ENSG00000280378.1		54033126	54034880	-1	lncRNA	TEC	30.4308	-1.57578	0.307922	1.93e-08	1.07e-06	46	57	14	14	5	19	41.0051	47.7516	14.7947	12.5786	6.20963	21.3447	Down Regulated
ENSG00000233339	ENSG00000233339.1		106179542	106183797	1	lncRNA	novel transcript	37.1615	1.98382	0.390403	1.93e-08	1.07e-06	20	14	71	63	47	60	17.8283	11.7285	75.0302	56.6038	58.3706	67.4043	Up Regulated
ENSG00000279491	ENSG00000279491.1		61967729	61969490	1	lncRNA	TEC	80.3274	1.11155	0.217887	1.97e-08	1.09e-06	65	67	141	124	103	118	57.942	56.1291	149.004	111.411	127.918	132.562	Up Regulated
ENSG00000206417	ENSG00000206417.8	H1-10-AS1	129315392	129326225	1	lncRNA	H1-10 antisense RNA 1 [Source:HGNC Symbol;Acc:HGNC:27953]	27.7597	-1.85401	0.361292	2.05e-08	1.13e-06	37	38	10	14	3	4	32.9824	31.8344	10.5676	12.5786	3.72578	4.49362	Down Regulated
ENSG00000232756	ENSG00000232756.1	DDX3ILA1	77990384	77995171	1	lncRNA	DDX3 interacting lncRNA 1 [Source:HGNC Symbol;Acc:HGNC:55358]	45.93	-1.32323	0.260909	2.44e-08	1.33e-06	96	106	32	35	21	35	85.5759	88.8012	33.8164	31.4466	26.0805	39.3192	Down Regulated
ENSG00000280326	ENSG00000280326.1		140591684	140593201	1	lncRNA	TEC	88.4523	1.39199	0.278324	2.51e-08	1.37e-06	71	81	142	225	103	229	63.2905	67.8575	150.06	202.157	127.918	257.26	Up Regulated
ENSG00000214900	ENSG00000214900.9	LINC01588	49927571	50105102	-1	lncRNA	long intergenic non-protein coding RNA 1588 [Source:HGNC Symbol;Acc:HGNC:27503]	242.606	0.925009	0.18321	2.57e-08	1.39e-06	241	271	409	489	338	412	214.831	227.03	432.216	439.354	419.771	462.843	Up Regulated
ENSG00000261997	ENSG00000261997.1		55538200	55542027	1	lncRNA	novel transcript	438.851	-0.975542	0.191338	2.62e-08	1.42e-06	591	646	244	316	201	220	526.827	541.185	257.85	283.918	249.627	247.149	Down Regulated
ENSG00000226889	ENSG00000226889.3	ATF6-DT	161749452	161766227	-1	lncRNA	ATF6 divergent transcript [Source:HGNC Symbol;Acc:HGNC:55826]	15.3248	4.07149	0.760554	3.08e-08	1.63e-06	3	1	33	49	26	27	2.67425	0.837747	34.8732	44.0252	32.2901	30.3319	Up Regulated
ENSG00000235862	ENSG00000235862.2		212624284	212626771	-1	lncRNA	novel transcript	19.7144	2.861	0.572827	3.32e-08	1.76e-06	10	4	41	62	42	48	8.91416	3.35099	43.3273	55.7054	52.1609	53.9234	Up Regulated
ENSG00000263884	ENSG00000263884.1	THOC1-DT	268113	270298	1	lncRNA	THOC1 divergent transcript [Source:HGNC Symbol;Acc:HGNC:55334]	62.2317	1.18344	0.23736	3.61e-08	1.9e-06	46	49	92	78	101	95	41.0051	41.0496	97.2222	70.0809	125.435	106.723	Up Regulated
ENSG00000233791	ENSG00000233791.5	BTG2-DT	203298758	203305315	-1	lncRNA	BTG2 divergent transcript [Source:HGNC Symbol;Acc:HGNC:49452]	44.5706	1.6158	0.322984	3.71e-08	1.94e-06	22	15	52	50	48	49	19.6112	12.5662	54.9517	44.9237	59.6125	55.0468	Up Regulated
ENSG00000259768	ENSG00000259768.5	ZFHX3-AS1	72665123	72828293	1	lncRNA	ZFHX3 antisense RNA 1 [Source:HGNC Symbol;Acc:HGNC:56033]	196.609	-0.756221	0.149659	3.73e-08	1.94e-06	237	317	128	140	110	134	211.266	265.566	135.266	125.786	136.612	150.536	Down Regulated
ENSG00000255363	ENSG00000255363.2	LINC02757	76607853	76630465	-1	lncRNA	long intergenic non-protein coding RNA 2757 [Source:HGNC Symbol;Acc:HGNC:54277]	21.8986	4.07314	0.767824	3.79e-08	1.96e-06	2	2	28	48	30	29	1.78283	1.67549	29.5894	43.1267	37.2578	32.5787	Up Regulated
ENSG00000250602	ENSG00000250602.6		126372477	126509021	-1	lncRNA	novel transcript, antisense to GRAMD3	44.2662	1.40906	0.28296	4.12e-08	2.12e-06	20	32	50	65	58	66	17.8283	26.8079	52.8382	58.4008	72.0318	74.1447	Up Regulated
ENSG00000270933	ENSG00000270933.1		25948657	25949403	-1	lncRNA	novel transcript	8.1186	-2.41198	0.484612	4.29e-08	2.18e-06	38	44	4	7	5	6	33.8738	36.8609	4.22705	6.28931	6.20963	6.74043	Down Regulated
ENSG00000267141	ENSG00000267141.1		1860250	1862019	1	lncRNA	novel transcript, antisense to KLF16	25.6587	-1.80555	0.364779	4.29e-08	2.18e-06	67	59	8	13	13	19	59.7249	49.4271	8.45411	11.6802	16.1451	21.3447	Down Regulated
ENSG00000258082	ENSG00000258082.1		234978814	234980804	-1	lncRNA	novel transcript	226.129	1.05855	0.214184	4.4e-08	2.24e-06	82	82	131	181	130	143	73.0961	68.6953	138.436	162.624	161.451	160.647	Up Regulated
ENSG00000273213	ENSG00000273213.2	H3-7	143894544	143905977	-1	lncRNA	H3.7 histone (putative) [Source:HGNC Symbol;Acc:HGNC:32060]	28.579	2.13819	0.440319	4.58e-08	2.32e-06	14	33	100	109	87	77	12.4798	27.6457	105.676	97.9336	108.048	86.5022	Up Regulated
ENSG00000271730	ENSG00000271730.1		108998482	108999125	1	lncRNA	novel transcript, antisense to SESN1	60.2346	-1.10837	0.22836	8.04e-08	3.88e-06	113	152	40	67	39	43	100.73	127.338	42.2705	60.1977	48.4352	48.3064	Down Regulated
ENSG00000228140	ENSG00000228140.1	EFHD2-AS1	15402979	15409433	-1	lncRNA	EFHD2 antisense RNA 1 [Source:HGNC Symbol;Acc:HGNC:55801]	45.1263	1.29352	0.268667	8.43e-08	4.05e-06	40	32	59	95	72	81	35.6566	26.8079	62.349	85.355	89.4187	90.9958	Up Regulated
ENSG00000285973	ENSG00000285973.1		122145106	122155197	-1	lncRNA	novel transcript, antisense to TACC2	174.475	-1.05259	0.217354	8.48e-08	4.05e-06	137	164	59	56	45	62	122.124	137.391	62.349	50.3145	55.8867	69.6511	Down Regulated
ENSG00000286074	ENSG00000286074.1		76148561	76200666	1	lncRNA	novel transcript	16.5883	-2.20387	0.452225	8.89e-08	4.23e-06	34	38	4	13	1	5	30.3081	31.8344	4.22705	11.6802	1.24193	5.61702	Down Regulated
ENSG00000280303	ENSG00000280303.2	ERICD	140636281	140638283	1	lncRNA	E2F1-regulated inhibitor of cell death [Source:HGNC Symbol;Acc:HGNC:49404]	99.1021	1.31404	0.277413	9.06e-08	4.29e-06	110	144	282	302	248	261	98.0558	120.636	298.007	271.339	307.998	293.209	Up Regulated
ENSG00000281357	ENSG00000281357.2	ARRDC3-AS1	91380349	91616105	1	lncRNA	ARRDC3 antisense RNA 1 [Source:HGNC Symbol;Acc:HGNC:44145]	160.985	0.64302	0.131325	9.31e-08	4.39e-06	194	184	253	264	205	263	172.935	154.146	267.361	237.197	254.595	295.455	Up Regulated
ENSG00000267529	ENSG00000267529.3		13471012	13472709	-1	lncRNA	novel transcript, antisense C18orf1	146.243	-0.856188	0.174902	1.04e-07	4.77e-06	175	198	76	110	49	90	155.998	165.874	80.314	98.8321	60.8544	101.106	Down Regulated
ENSG00000285399	ENSG00000285399.2	AC104162.2	63863155	63905838	1	lncRNA	novel transcript	113.131	-1.10225	0.230756	1.13e-07	5.12e-06	109	140	52	36	33	55	97.1643	117.285	54.9517	32.345	40.9836	61.7873	Down Regulated
ENSG00000280077	ENSG00000280077.1		41012231	41014133	1	lncRNA	TEC	198.605	-0.735584	0.152466	1.25e-07	5.63e-06	356	373	187	199	129	172	317.344	312.48	197.615	178.796	160.209	193.226	Down Regulated
ENSG00000251867	ENSG00000251867.4		80484561	80486699	-1	lncRNA	novel transcript, antisense to ZBTB10	31.915	1.85033	0.389948	1.41e-07	6.27e-06	8	18	47	53	36	33	7.13133	15.0795	49.6679	47.6191	44.7094	37.0724	Up Regulated
ENSG00000260493	ENSG00000260493.1	E2F5-DT	85172077	85177062	-1	lncRNA	E2F5 divergent transcript [Source:HGNC Symbol;Acc:HGNC:55393]	17.1885	-1.92848	0.40875	1.47e-07	6.53e-06	42	39	9	9	7	6	37.4395	32.6721	9.51087	8.08626	8.69349	6.74043	Down Regulated
ENSG00000178803	ENSG00000178803.11	ADORA2A-AS1	24429206	24495074	-1	lncRNA	ADORA2A antisense RNA 1 [Source:HGNC Symbol;Acc:HGNC:37122]	19.344	3.07425	0.667703	1.71e-07	7.54e-06	6	8	58	63	46	62	5.3485	6.70198	61.2923	56.6038	57.1286	69.6511	Up Regulated
ENSG00000236977	ENSG00000236977.1	ANKRD44-IT1	197250858	197302519	-1	lncRNA	ANKRD44 intronic transcript 1 [Source:HGNC Symbol;Acc:HGNC:41477]	150.887	-1.10069	0.234554	1.86e-07	8.15e-06	194	288	51	122	66	105	172.935	241.271	53.8949	109.614	81.9672	117.958	Down Regulated
ENSG00000224595	ENSG00000224595.1		114414244	114419875	-1	lncRNA	novel transcript	49.3884	-1.15547	0.248888	2.17e-07	9.38e-06	73	68	25	35	11	26	65.0734	56.9668	26.4191	31.4466	13.6612	29.2085	Down Regulated
ENSG00000271862	ENSG00000271862.1		83049376	83050964	-1	lncRNA	novel transcript	123.332	-1.10135	0.235799	2.2e-07	9.52e-06	174	182	64	72	53	65	155.106	152.47	67.6328	64.6901	65.8221	73.0213	Down Regulated
ENSG00000230735	ENSG00000230735.1		89629725	89676386	1	lncRNA	novel transcript	104.554	-1.37509	0.296811	2.21e-07	9.52e-06	94	106	21	42	29	24	83.7931	88.8012	22.192	37.7359	36.0159	26.9617	Down Regulated
ENSG00000236535	ENSG00000236535.1	RC3H1-IT1	174009267	174016206	-1	lncRNA	RC3H1 intronic transcript 1 [Source:HGNC Symbol;Acc:HGNC:41496]	145.416	-1.05317	0.23003	3.17e-07	1.33e-05	145	209	53	75	40	92	129.255	175.089	56.0085	67.3855	49.6771	103.353	Down Regulated
ENSG00000254162	ENSG00000254162.1		80535006	80539135	-1	lncRNA	novel transcript	85.7549	1.56028	0.348451	3.18e-07	1.33e-05	35	36	62	96	81	131	31.1996	30.1589	65.5193	86.2535	100.596	147.166	Up Regulated
ENSG00000232860	ENSG00000232860.7	SMG7-AS1	183460874	183472896	-1	lncRNA	SMG7 antisense RNA 1 [Source:HGNC Symbol;Acc:HGNC:24518]	52.4376	1.40787	0.304294	3.48e-07	1.44e-05	35	27	76	88	56	65	31.1996	22.6192	80.314	79.0657	69.5479	73.0213	Up Regulated
ENSG00000279048	ENSG00000279048.1		17940503	17942926	1	lncRNA	tec	35.6517	-1.22569	0.270914	3.66e-07	1.51e-05	66	70	32	25	15	16	58.8335	58.6423	33.8164	22.4618	18.6289	17.9745	Down Regulated
ENSG00000257715	ENSG00000257715.1		96025323	96027971	1	lncRNA	novel transcript, antisense to LTA4H	10.9014	-2.67996	0.586761	3.71e-07	1.52e-05	27	38	2	6	3	3	24.0682	31.8344	2.11353	5.39084	3.72578	3.37021	Down Regulated
ENSG00000286177	ENSG00000286177.1		41307397	41310412	-1	lncRNA	novel transcript, antisense to CCDC97 and HNRNPUL1	71.2093	-0.887086	0.195713	3.78e-07	1.55e-05	118	124	54	61	34	53	105.187	103.881	57.0652	54.8069	42.2255	59.5405	Down Regulated
ENSG00000266709	ENSG00000266709.1		14303854	14305505	1	lncRNA	novel transcript	54.2214	1.51641	0.343553	3.89e-07	1.59e-05	64	49	149	159	124	145	57.0506	41.0496	157.458	142.857	153.999	162.894	Up Regulated
ENSG00000250548	ENSG00000250548.6	LINC01303	61556273	61570653	-1	lncRNA	long intergenic non-protein coding RNA 1303 [Source:HGNC Symbol;Acc:HGNC:50470]	18.6811	2.11479	0.453897	3.94e-07	1.6e-05	8	6	31	34	17	28	7.13133	5.02648	32.7597	30.5481	21.1128	31.4553	Up Regulated
ENSG00000246130	ENSG00000246130.1		23068229	23083619	1	lncRNA	novel transcript	10.4171	2.97041	0.635654	4.1e-07	1.67e-05	2	5	27	38	12	31	1.78283	4.18874	28.5326	34.142	14.9031	34.8255	Up Regulated
ENSG00000234807	ENSG00000234807.6	LINC01135	58784384	58901109	1	lncRNA	long intergenic non-protein coding RNA 1135 [Source:HGNC Symbol;Acc:HGNC:49450]	19.0397	2.26258	0.50017	4.65e-07	1.86e-05	9	5	36	35	25	30	8.02274	4.18874	38.0435	31.4466	31.0482	33.7021	Up Regulated
ENSG00000260608	ENSG00000260608.1		83012661	83061845	1	lncRNA	novel transcript, antisense to BTBD1	30.9233	-1.39302	0.310328	4.65e-07	1.86e-05	42	44	9	15	12	13	37.4395	36.8609	9.51087	13.4771	14.9031	14.6043	Down Regulated
ENSG00000253716	ENSG00000253716.5	MINCR	143280152	143281705	-1	lncRNA	MYC-induced long non-coding RNA [Source:HGNC Symbol;Acc:HGNC:51653]	82.1722	-0.885809	0.198156	5.02e-07	1.99e-05	134	149	60	68	56	51	119.45	124.824	63.4058	61.0962	69.5479	57.2936	Down Regulated
ENSG00000263089	ENSG00000263089.1		57092145	57096425	-1	lncRNA	novel transcript, antisense to AKAP1	54.9767	-1.49894	0.336562	5.15e-07	2.04e-05	35	59	16	11	8	14	31.1996	49.4271	16.9082	9.88321	9.93542	15.7277	Down Regulated
ENSG00000260378	ENSG00000260378.1		12745873	12757835	1	lncRNA	novel transcript, antisense to CPPED1	39.593	-1.52484	0.34011	5.17e-07	2.04e-05	45	61	6	23	15	11	40.1137	51.1026	6.34058	20.6649	18.6289	12.3575	Down Regulated
ENSG00000249604	ENSG00000249604.1		107936031	107941255	-1	lncRNA	novel transcript	22.6221	-1.59906	0.361476	6e-07	2.35e-05	34	34	9	11	6	7	30.3081	28.4834	9.51087	9.88321	7.45156	7.86383	Down Regulated
ENSG00000264895	ENSG00000264895.1		51249579	51251748	-1	lncRNA	novel transcript, sense intronic to MBTD1	47.8233	-1.09059	0.245396	6.33e-07	2.47e-05	62	79	17	34	24	26	55.2678	66.182	17.965	30.5481	29.8062	29.2085	Down Regulated
ENSG00000274215	ENSG00000274215.1		92808451	92809057	1	lncRNA	novel transcript	11.6167	2.97526	0.665113	6.49e-07	2.52e-05	5	3	27	41	21	36	4.45708	2.51324	28.5326	36.8374	26.0805	40.4426	Up Regulated
ENSG00000266389	ENSG00000266389.1	PIK3R5-DT	8965896	8967070	1	lncRNA	PIK3R5 divergent transcript [Source:HGNC Symbol;Acc:HGNC:55321]	23.3807	1.57764	0.360403	7.09e-07	2.73e-05	13	21	37	43	46	54	11.5884	17.5927	39.1002	38.6344	57.1286	60.6639	Up Regulated
ENSG00000253513	ENSG00000253513.1	SQLE-DT	124996985	124998198	-1	lncRNA	SQLE divergent transcript [Source:HGNC Symbol;Acc:HGNC:55534]	14.1858	1.87525	0.432507	7.37e-07	2.83e-05	14	14	61	43	46	37	12.4798	11.7285	64.4626	38.6344	57.1286	41.566	Up Regulated
ENSG00000261158	ENSG00000261158.1		12759282	12761162	1	lncRNA	novel transcript, antisense to CPPED1	33.1764	-1.48306	0.33957	7.85e-07	2.99e-05	44	70	11	15	9	25	39.2223	58.6423	11.6244	13.4771	11.1773	28.0851	Down Regulated
ENSG00000260293	ENSG00000260293.2		2476558	2482173	1	lncRNA	novel transcript, intronic to TBC1D24	10.871	-2.316	0.526319	7.97e-07	3.03e-05	26	24	5	4	5	0	23.1768	20.1059	5.28382	3.59389	6.20963	0	Down Regulated
ENSG00000255045	ENSG00000255045.1		124744634	124746337	-1	lncRNA	novel transcript	19.8542	-1.99419	0.456481	8.14e-07	3.08e-05	31	53	7	8	6	9	27.6339	44.4006	7.39734	7.18779	7.45156	10.1106	Down Regulated
ENSG00000261360	ENSG00000261360.1	OTULIN-DT	14661808	14664604	-1	lncRNA	OTULIN divergent transcript [Source:HGNC Symbol;Acc:HGNC:55368]	16.7242	-1.78619	0.410256	8.25e-07	3.11e-05	34	49	5	15	3	12	30.3081	41.0496	5.28382	13.4771	3.72578	13.4809	Down Regulated
ENSG00000272240	ENSG00000272240.1		234347	234887	-1	lncRNA	novel transcript, antisense to ZNF596	33.2698	-1.06401	0.243237	8.4e-07	3.17e-05	73	77	21	30	30	28	65.0734	64.5065	22.192	26.9542	37.2578	31.4553	Down Regulated
ENSG00000286059	ENSG00000286059.1		233977872	233980018	-1	lncRNA	novel transcript, antisense to TRPM8	57.4851	-1.20911	0.27752	8.44e-07	3.18e-05	141	223	55	66	45	69	125.69	186.818	58.122	59.2993	55.8867	77.5149	Down Regulated
ENSG00000234222	ENSG00000234222.6	LIX1L-AS1	145926590	145959179	1	lncRNA	LIX1L antisense RNA 1 [Source:HGNC Symbol;Acc:HGNC:41210]	23.5451	-1.33355	0.308025	8.57e-07	3.22e-05	46	56	21	12	11	16	41.0051	46.9139	22.192	10.7817	13.6612	17.9745	Down Regulated
ENSG00000223911	ENSG00000223911.1		147899401	147902956	-1	lncRNA	novel transcript	28.8734	1.54446	0.364502	9.41e-07	3.49e-05	34	35	89	110	78	86	30.3081	29.3212	94.0519	98.8321	96.8703	96.6128	Up Regulated
ENSG00000240549	ENSG00000240549.2	THOC7-AS1	63860645	63861819	1	lncRNA	THOC7 antisense RNA 1 [Source:HGNC Symbol;Acc:HGNC:41249]	17.0729	-2.07926	0.479647	1.01e-06	3.74e-05	22	29	5	4	3	5	19.6112	24.2947	5.28382	3.59389	3.72578	5.61702	Down Regulated
ENSG00000233429	ENSG00000233429.9	HOTAIRM1	27095647	27100265	1	lncRNA	HOXA transcript antisense RNA, myeloid-specific 1 [Source:HGNC Symbol;Acc:HGNC:37117]	38.2566	-1.08535	0.252209	1.03e-06	3.79e-05	70	86	35	28	22	26	62.3991	72.0463	36.9867	25.1573	27.3224	29.2085	Down Regulated
ENSG00000286145	ENSG00000286145.1		127294212	127375075	1	lncRNA	novel transcript, antisense to MAP3K2	276.74	-0.948932	0.21918	1.09e-06	3.97e-05	307	392	112	159	111	169	273.665	328.397	118.357	142.857	137.854	189.855	Down Regulated
ENSG00000266053	ENSG00000266053.2	NDUFV2-AS1	9121179	9136645	-1	lncRNA	NDUFV2 antisense RNA 1 [Source:HGNC Symbol;Acc:HGNC:50826]	32.5124	-1.00289	0.23371	1.15e-06	4.18e-05	72	84	22	45	22	30	64.182	70.3708	23.2488	40.4313	27.3224	33.7021	Down Regulated
ENSG00000177337	ENSG00000177337.7	DLGAP1-AS1	3593732	3598363	1	lncRNA	DLGAP1 antisense RNA 1 [Source:HGNC Symbol;Acc:HGNC:31676]	128.556	-0.779642	0.179674	1.16e-06	4.2e-05	260	283	118	137	112	121	231.768	237.082	124.698	123.091	139.096	135.932	Down Regulated
ENSG00000251136	ENSG00000251136.8	RIPK2-DT	89545424	89757812	-1	lncRNA	RIPK2 divergent transcript [Source:HGNC Symbol;Acc:HGNC:55545]	687.295	0.759597	0.177011	1.17e-06	4.22e-05	532	639	797	930	724	899	474.233	535.321	842.24	835.58	899.155	1009.94	Up Regulated
ENSG00000234571	ENSG00000234571.1	H2BP2	143904223	143904603	-1	lncRNA	H2B histone pseudogene 2 [Source:HGNC Symbol;Acc:HGNC:20654]	80.4623	1.02682	0.241676	1.21e-06	4.36e-05	65	63	107	144	88	116	57.942	52.7781	113.074	129.38	109.29	130.315	Up Regulated
ENSG00000278206	ENSG00000278206.1		143484979	143507327	1	lncRNA	novel transcript	52.0724	-1.0607	0.248771	1.25e-06	4.5e-05	76	58	23	35	15	25	67.7476	48.5893	24.3056	31.4466	18.6289	28.0851	Down Regulated
ENSG00000257568	ENSG00000257568.1		62482349	62484932	-1	lncRNA	novel transcript, antisense to MON2	35.5923	-1.44639	0.338608	1.26e-06	4.53e-05	53	63	16	17	11	19	47.2451	52.7781	16.9082	15.274	13.6612	21.3447	Down Regulated
ENSG00000236499	ENSG00000236499.2	LINC00896	20206380	20208524	1	lncRNA	long intergenic non-protein coding RNA 896 [Source:HGNC Symbol;Acc:HGNC:26519]	27.1792	-1.30637	0.308821	1.33e-06	4.74e-05	42	55	16	14	15	13	37.4395	46.0761	16.9082	12.5786	18.6289	14.6043	Down Regulated
ENSG00000256982	ENSG00000256982.1		89046172	89052975	-1	lncRNA	novel transcript	16.2721	2.18418	0.508387	1.39e-06	4.92e-05	6	7	27	23	30	30	5.3485	5.86423	28.5326	20.6649	37.2578	33.7021	Up Regulated
ENSG00000238160	ENSG00000238160.1	LINC02863	132419416	132426714	-1	lncRNA	long intergenic non-protein coding RNA 2863 [Source:HGNC Symbol;Acc:HGNC:41290]	181.078	-0.67185	0.155031	1.39e-06	4.92e-05	332	308	142	195	129	163	295.95	258.026	150.06	175.202	160.209	183.115	Down Regulated
ENSG00000244041	ENSG00000244041.7	LINC01011	2987967	2991173	1	lncRNA	long intergenic non-protein coding RNA 1011 [Source:HGNC Symbol;Acc:HGNC:33812]	16.8808	-1.48312	0.352062	1.39e-06	4.92e-05	50	38	13	9	11	13	44.5708	31.8344	13.7379	8.08626	13.6612	14.6043	Down Regulated
ENSG00000280187	ENSG00000280187.1		69186359	69189511	-1	lncRNA	TEC	171.245	-0.575022	0.134844	1.39e-06	4.92e-05	287	253	117	177	112	160	255.836	211.95	123.641	159.03	139.096	179.745	Down Regulated
ENSG00000259943	ENSG00000259943.1	ZMPSTE24-DT	40256333	40257971	-1	lncRNA	ZMPSTE24 divergent transcript [Source:HGNC Symbol;Acc:HGNC:55402]	1944.94	-0.393278	0.0872121	1.41e-06	4.98e-05	3364	3428	2055	2510	1866	1831	2998.72	2871.8	2171.65	2255.17	2317.44	2056.95	Down Regulated
ENSG00000261490	ENSG00000261490.1	AC005674.2	10068089	10073019	-1	lncRNA	novel transcript	284.086	0.8009	0.188873	1.42e-06	4.98e-05	231	268	455	394	287	346	205.917	224.516	480.827	353.999	356.433	388.698	Up Regulated
ENSG00000280388	ENSG00000280388.1		76043977	76045963	-1	lncRNA	TEC	143.663	-0.694245	0.16171	1.48e-06	5.18e-05	218	255	106	138	79	132	194.329	213.626	112.017	123.989	98.1122	148.289	Down Regulated
ENSG00000260368	ENSG00000260368.1		100913247	100914388	-1	lncRNA	novel transcript, overlapping YWHAZ	168.549	1.03002	0.247645	1.53e-06	5.35e-05	169	166	253	368	223	351	150.649	139.066	267.361	330.638	276.95	394.315	Up Regulated
ENSG00000259118	ENSG00000259118.5		65082034	65094212	1	lncRNA	novel transcript, antisense to MAX	40.2673	-1.11818	0.262116	1.55e-06	5.41e-05	50	76	25	22	17	24	44.5708	63.6688	26.4191	19.7664	21.1128	26.9617	Down Regulated
ENSG00000265975	ENSG00000265975.1		8967523	8976995	1	lncRNA	novel transcript	24.1733	1.30666	0.310303	1.55e-06	5.41e-05	20	26	43	64	45	50	17.8283	21.7814	45.4408	57.5023	55.8867	56.1702	Up Regulated
ENSG00000265778	ENSG00000265778.2	ZNF516-AS1	76491629	76493920	1	lncRNA	ZNF516 antisense RNA 1 [Source:HGNC Symbol;Acc:HGNC:55324]	61.2642	-1.02408	0.243361	1.59e-06	5.52e-05	72	93	42	22	26	32	64.182	77.9105	44.3841	19.7664	32.2901	35.949	Down Regulated
ENSG00000235947	ENSG00000235947.1	EGOT	4749192	4751590	-1	lncRNA	eosinophil granule ontogeny transcript [Source:HGNC Symbol;Acc:HGNC:37129]	72.96	1.63216	0.385923	1.6e-06	5.56e-05	14	10	37	32	26	40	12.4798	8.37747	39.1002	28.7512	32.2901	44.9362	Up Regulated
ENSG00000255097	ENSG00000255097.1		9242448	9245509	-1	lncRNA	novel transcript	25.8013	1.75824	0.423734	1.63e-06	5.62e-05	7	26	39	59	29	77	6.23991	21.7814	41.2138	53.0099	36.0159	86.5022	Up Regulated
ENSG00000224429	ENSG00000224429.7	LINC00539	21302862	21362139	-1	lncRNA	long intergenic non-protein coding RNA 539 [Source:HGNC Symbol;Acc:HGNC:43672]	29.0713	-1.31512	0.316449	1.82e-06	6.17e-05	65	60	20	16	17	21	57.942	50.2648	21.1353	14.3756	21.1128	23.5915	Down Regulated
ENSG00000227200	ENSG00000227200.1		124262876	124265809	1	lncRNA	novel transcript	69.7576	-1.04678	0.24839	1.86e-06	6.29e-05	97	135	33	67	31	41	86.4674	113.096	34.8732	60.1977	38.4997	46.0596	Down Regulated
ENSG00000258441	ENSG00000258441.1	LINC00641	21200079	21206900	-1	lncRNA	long intergenic non-protein coding RNA 641 [Source:HGNC Symbol;Acc:HGNC:27511]	1137.75	0.711692	0.169471	1.88e-06	6.34e-05	820	986	1173	1391	1106	1316	730.961	826.019	1239.58	1249.78	1373.57	1478.4	Up Regulated
ENSG00000179082	ENSG00000179082.3	LINC02913	129321016	129324905	1	lncRNA	long intergenic non-protein coding RNA 2913 [Source:HGNC Symbol;Acc:HGNC:31370]	136.081	-1.02279	0.244655	1.88e-06	6.34e-05	125	142	42	51	38	67	111.427	118.96	44.3841	45.8221	47.1932	75.2681	Down Regulated
ENSG00000267607	ENSG00000267607.1	ICAM4-AS1	10285801	10289019	-1	lncRNA	ICAM4 antisense RNA 1 [Source:HGNC Symbol;Acc:HGNC:55990]	19.9443	2.26915	0.566684	2.01e-06	6.7e-05	14	19	90	74	75	63	12.4798	15.9172	95.1087	66.487	93.1445	70.7745	Up Regulated
ENSG00000204464	ENSG00000204464.7	TMEM51-AS2	15164344	15171317	-1	lncRNA	TMEM51 antisense RNA 2 [Source:HGNC Symbol;Acc:HGNC:32332]	64.0834	-1.10579	0.264131	2.08e-06	6.91e-05	77	107	37	36	32	24	68.639	89.639	39.1002	32.345	39.7417	26.9617	Down Regulated
ENSG00000284968	ENSG00000284968.1		86924630	86936202	-1	lncRNA	Novel transcript, antisense to AFF1	85.6757	-0.80917	0.193081	2.12e-06	7.05e-05	131	162	58	82	46	72	116.776	135.715	61.2923	73.6748	57.1286	80.8851	Down Regulated
ENSG00000258380	ENSG00000258380.1		89399995	89409469	1	lncRNA	novel transcript, antisense to FOXN3	51.483	-1.50899	0.366466	2.15e-06	7.14e-05	44	50	13	11	6	18	39.2223	41.8874	13.7379	9.88321	7.45156	20.2213	Down Regulated
ENSG00000259583	ENSG00000259583.2	ALDH1A3-AS1	100892343	100919391	-1	lncRNA	ALDH1A3 antisense RNA 1 [Source:HGNC Symbol;Acc:HGNC:55416]	55.1298	-0.894906	0.214123	2.31e-06	7.6e-05	104	79	27	57	42	26	92.7073	66.182	28.5326	51.213	52.1609	29.2085	Down Regulated
ENSG00000260317	ENSG00000260317.1	LINC02986	80541300	80543104	1	lncRNA	long intergenic non-protein coding RNA 2986 [Source:HGNC Symbol;Acc:HGNC:56083]	46.5304	1.77645	0.434829	2.34e-06	7.67e-05	11	15	42	56	31	37	9.80558	12.5662	44.3841	50.3145	38.4997	41.566	Up Regulated
ENSG00000275278	ENSG00000275278.1		29156448	29156991	-1	lncRNA	novel transcript, antisense to FAR2	397.052	-0.916901	0.220961	2.43e-06	7.95e-05	318	375	118	156	141	140	283.47	314.155	124.698	140.162	175.112	157.277	Down Regulated
ENSG00000273369	ENSG00000273369.1		44693946	44694386	-1	lncRNA	novel transcript, antisense to GUF1	31.9657	-1.19492	0.291941	2.47e-06	8.07e-05	63	55	16	25	19	17	56.1592	46.0761	16.9082	22.4618	23.5966	19.0979	Down Regulated
ENSG00000273828	ENSG00000273828.2		46364551	46397994	1	lncRNA	novel transcript, antisense to ELMO2	160.074	-0.851374	0.20514	2.51e-06	8.18e-05	240	266	100	126	83	121	213.94	222.841	105.676	113.208	103.08	135.932	Down Regulated
ENSG00000225945	ENSG00000225945.1	ZFAND3-DT	37815777	37819218	-1	lncRNA	ZFAND3 divergent transcript [Source:HGNC Symbol;Acc:HGNC:55841]	26.6867	1.35034	0.328974	2.56e-06	8.31e-05	21	16	48	47	35	39	18.7197	13.404	50.7246	42.2283	43.4674	43.8128	Up Regulated
ENSG00000261504	ENSG00000261504.1	LINC01686	182615254	182616629	1	lncRNA	long intergenic non-protein coding RNA 1686 [Source:HGNC Symbol;Acc:HGNC:27643]	65.6295	1.1244	0.277295	2.64e-06	8.55e-05	44	49	94	103	70	90	39.2223	41.0496	99.3357	92.5428	86.9349	101.106	Up Regulated
ENSG00000240449	ENSG00000240449.1	REPIN1-AS1	150363777	150372590	-1	lncRNA	REPIN1 antisense RNA 1 [Source:HGNC Symbol;Acc:HGNC:41201]	56.9331	1.23286	0.307066	2.65e-06	8.6e-05	54	59	124	137	97	114	48.1365	49.4271	131.039	123.091	120.467	128.068	Up Regulated
ENSG00000272888	ENSG00000272888.6	CHASERR	92819540	92899701	1	lncRNA	CHD2 adjacent suppressive regulatory RNA [Source:HGNC Symbol;Acc:HGNC:48626]	2733.71	0.579484	0.138357	2.67e-06	8.63e-05	2924	2991	3679	4296	3215	3646	2606.5	2505.7	3887.83	3859.84	3992.8	4095.93	Up Regulated
ENSG00000235586	ENSG00000235586.1		38601598	38602178	1	lncRNA	novel transcript	38.2924	-1.22027	0.301852	3.15e-06	0.000100124	47	66	16	24	18	14	41.8966	55.2913	16.9082	21.5634	22.3547	15.7277	Down Regulated
ENSG00000236859	ENSG00000236859.6	NIFK-AS1	121649320	121728563	1	lncRNA	NIFK antisense RNA 1 [Source:HGNC Symbol;Acc:HGNC:27385]	129.921	-0.559183	0.133606	3.24e-06	0.000102736	203	223	123	118	96	116	180.957	186.818	129.982	106.02	119.225	130.315	Down Regulated
ENSG00000285693	ENSG00000285693.1		72793624	72814072	-1	lncRNA	Novel transcript	72.9056	-1.00354	0.250479	3.52e-06	0.000110586	105	76	31	37	28	40	93.5987	63.6688	32.7597	33.2435	34.774	44.9362	Down Regulated
ENSG00000249173	ENSG00000249173.5	LINC01093	184892858	184899553	-1	lncRNA	long intergenic non-protein coding RNA 1093 [Source:HGNC Symbol;Acc:HGNC:49218]	9.42594	3.30016	0.760899	3.56e-06	0.000111697	2	2	25	28	11	18	1.78283	1.67549	26.4191	25.1573	13.6612	20.2213	Up Regulated
ENSG00000272562	ENSG00000272562.1	H3-3A-DT	226045561	226061898	-1	lncRNA	H3-3A divergent transcript [Source:HGNC Symbol;Acc:HGNC:55210]	42.1384	-1.25784	0.314473	3.65e-06	0.000113503	50	65	16	21	12	22	44.5708	54.4536	16.9082	18.8679	14.9031	24.7149	Down Regulated
ENSG00000259248	ENSG00000259248.6	USP3-AS1	63544247	63601589	-1	lncRNA	USP3 antisense RNA 1 [Source:HGNC Symbol;Acc:HGNC:44140]	183.948	-0.79361	0.193404	3.81e-06	0.000118061	171	235	96	102	75	88	152.432	196.871	101.449	91.6443	93.1445	98.8596	Down Regulated
ENSG00000273797	ENSG00000273797.1		69617122	69617648	1	lncRNA	novel transcript, sense intronic to KIAA0247	45.1026	1.35754	0.342349	3.86e-06	0.000119644	25	19	47	44	47	63	22.2854	15.9172	49.6679	39.5328	58.3706	70.7745	Up Regulated
ENSG00000233334	ENSG00000233334.3	FAM53B-AS1	124703625	124714217	1	lncRNA	FAM53B antisense RNA 1 [Source:HGNC Symbol;Acc:HGNC:49499]	35.7733	-1.5563	0.388278	3.89e-06	0.00012004	27	32	9	6	8	6	24.0682	26.8079	9.51087	5.39084	9.93542	6.74043	Down Regulated
ENSG00000258449	ENSG00000258449.1		25096868	25100980	-1	lncRNA	novel transcript, antisense to LRMP	19.0585	-3.46385	0.814337	3.89e-06	0.00012004	17	18	2	1	0	1	15.1541	15.0795	2.11353	0.898473	0	1.1234	Down Regulated
ENSG00000280155	ENSG00000280155.1		132130252	132131795	-1	lncRNA	TEC	17.3389	2.07164	0.508917	4.18e-06	0.000127547	5	7	18	38	14	27	4.45708	5.86423	19.0217	34.142	17.387	30.3319	Up Regulated
ENSG00000231663	ENSG00000231663.1	COA6-AS1	234372807	234373664	-1	lncRNA	COA6 antisense RNA 1 [Source:HGNC Symbol;Acc:HGNC:40825]	29.8063	-1.05755	0.268819	4.3e-06	0.000131076	67	67	39	22	13	22	59.7249	56.1291	41.2138	19.7664	16.1451	24.7149	Down Regulated
ENSG00000278546	ENSG00000278546.1		31560132	31560573	1	lncRNA	novel transcript	13.5018	1.47795	0.373375	4.34e-06	0.00013209	12	21	44	47	29	47	10.697	17.5927	46.4976	42.2283	36.0159	52.8	Up Regulated
ENSG00000281491	ENSG00000281491.1	DNAJB5-DT	34985410	34989379	-1	lncRNA	DNAJB5 divergent transcript [Source:HGNC Symbol;Acc:HGNC:49846]	25.0658	1.58798	0.397284	4.54e-06	0.000136779	13	9	24	40	20	38	11.5884	7.53973	25.3623	35.9389	24.8385	42.6894	Up Regulated
ENSG00000205740	ENSG00000205740.2		971146	988341	-1	lncRNA	novel transcript, antisense to GTPBP4	27.2246	-1.2464	0.315873	4.58e-06	0.000137683	47	54	18	20	10	15	41.8966	45.2384	19.0217	17.9695	12.4193	16.8511	Down Regulated
ENSG00000270195	ENSG00000270195.2	AC016773.1	1712821	1715945	1	lncRNA	novel transcript	24.6074	-1.49744	0.380237	4.58e-06	0.000137683	40	46	14	12	8	10	35.6566	38.5364	14.7947	10.7817	9.93542	11.234	Down Regulated
ENSG00000279356	ENSG00000279356.1		50072862	50074986	1	lncRNA	novel transcript	30.3947	-1.40861	0.358608	4.63e-06	0.000139005	57	81	21	18	11	25	50.8107	67.8575	22.192	16.1725	13.6612	28.0851	Down Regulated
ENSG00000246898	ENSG00000246898.1	LINC00920	66408516	66412135	1	lncRNA	long intergenic non-protein coding RNA 920 [Source:HGNC Symbol;Acc:HGNC:48611]	51.1338	-0.890433	0.223823	4.7e-06	0.000140277	101	83	31	52	26	43	90.033	69.533	32.7597	46.7206	32.2901	48.3064	Down Regulated
ENSG00000271918	ENSG00000271918.1		116083807	116085444	-1	lncRNA	novel transcript, antisense to COMMD10	35.9004	-1.10692	0.284347	4.97e-06	0.000147952	59	77	34	20	17	22	52.5935	64.5065	35.9299	17.9695	21.1128	24.7149	Down Regulated
ENSG00000284930	ENSG00000284930.1		73458850	73466167	-1	lncRNA	novel transcript	71.8928	1.03811	0.267572	5.02e-06	0.000149201	84	123	216	173	178	169	74.8789	103.043	228.261	155.436	221.063	189.855	Up Regulated
ENSG00000247903	ENSG00000247903.1		26971586	26979582	1	lncRNA	novel transcript, antisense to TM7SF3	47.2765	-1.05281	0.267981	5.21e-06	0.000154002	41	60	14	25	12	22	36.5481	50.2648	14.7947	22.4618	14.9031	24.7149	Down Regulated
ENSG00000258424	ENSG00000258424.1		90402523	90405235	-1	lncRNA	novel transcript, antisense to CALM1	18.5922	-1.56621	0.40136	5.3e-06	0.000156353	51	35	7	15	7	13	45.4622	29.3212	7.39734	13.4771	8.69349	14.6043	Down Regulated
ENSG00000232386	ENSG00000232386.9		100849561	100861756	1	lncRNA	novel transcript	13.7901	-2.21678	0.564852	5.66e-06	0.000166132	19	26	4	2	6	1	16.9369	21.7814	4.22705	1.79695	7.45156	1.1234	Down Regulated
ENSG00000272750	ENSG00000272750.1		222658867	222661512	-1	lncRNA	novel transcript, antisense to MIA3	60.2556	-1.00936	0.25774	5.72e-06	0.000167535	91	117	44	44	33	34	81.1189	98.0164	46.4976	39.5328	40.9836	38.1958	Down Regulated
ENSG00000261430	ENSG00000261430.1		1467673	1472684	-1	lncRNA	novel transcript, intronic to CLCN7	18.9254	-1.64629	0.424419	5.75e-06	0.00016834	30	41	11	6	7	8	26.7425	34.3476	11.6244	5.39084	8.69349	8.98724	Down Regulated
ENSG00000254254	ENSG00000254254.5	PENK-AS1	56445807	56556513	1	lncRNA	PENK antisense RNA 1 [Source:HGNC Symbol;Acc:HGNC:55519]	43.6925	-1.2944	0.333317	6.03e-06	0.000175608	44	47	8	27	9	11	39.2223	39.3741	8.45411	24.2588	11.1773	12.3575	Down Regulated
ENSG00000249343	ENSG00000249343.2	LINC01333	74321293	74341236	1	lncRNA	long intergenic non-protein coding RNA 1333 [Source:HGNC Symbol;Acc:HGNC:50539]	5.75583	2.68584	0.694861	6.29e-06	0.000182312	8	1	35	38	16	31	7.13133	0.837747	36.9867	34.142	19.8708	34.8255	Up Regulated
ENSG00000285667	ENSG00000285667.1		84717474	84746837	-1	lncRNA	novel transcript	37.832	-1.11152	0.287675	6.5e-06	0.000187589	37	49	20	10	10	19	32.9824	41.0496	21.1353	8.98473	12.4193	21.3447	Down Regulated
ENSG00000231233	ENSG00000231233.1	CFAP58-DT	104351300	104353625	-1	lncRNA	CFAP58 divergent transcript [Source:HGNC Symbol;Acc:HGNC:45243]	17.341	1.78524	0.466742	6.7e-06	0.000193027	10	12	34	39	37	32	8.91416	10.053	35.9299	35.0405	45.9513	35.949	Up Regulated
ENSG00000263050	ENSG00000263050.1	DPH1-AS1	2043475	2044968	-1	lncRNA	DPH1 antisense RNA 1 [Source:HGNC Symbol;Acc:HGNC:56040]	57.2967	1.23332	0.325303	6.84e-06	0.000196447	38	50	85	135	46	111	33.8738	41.8874	89.8249	121.294	57.1286	124.698	Up Regulated
ENSG00000261592	ENSG00000261592.1		87396704	87400295	-1	lncRNA	novel transcript, antisense to MAP1LC3B	34.6772	1.29166	0.330845	6.99e-06	0.000200398	13	17	35	36	26	35	11.5884	14.2417	36.9867	32.345	32.2901	39.3192	Up Regulated
ENSG00000254510	ENSG00000254510.1		66409158	66417227	1	lncRNA	novel transcript	47.3064	1.22621	0.316319	7.2e-06	0.000204881	21	15	40	43	31	37	18.7197	12.5662	42.2705	38.6344	38.4997	41.566	Up Regulated
ENSG00000272980	ENSG00000272980.4		166999336	167139138	1	lncRNA	novel protein	32.1251	-1.40788	0.368077	7.31e-06	0.000207575	40	65	20	13	7	17	35.6566	54.4536	21.1353	11.6802	8.69349	19.0979	Down Regulated
ENSG00000281016	ENSG00000281016.1		386174	454070	1	lncRNA	novel transcript, antisense to ZNF721	35.7208	-1.1145	0.291202	7.51e-06	0.000211812	43	64	23	17	16	17	38.3309	53.6158	24.3056	15.274	19.8708	19.0979	Down Regulated
ENSG00000279561	ENSG00000279561.2		41269916	41273997	-1	lncRNA	TEC	91.5544	-0.770609	0.198318	7.8e-06	0.0002195	101	121	47	65	36	52	90.033	101.367	49.6679	58.4008	44.7094	58.417	Down Regulated
ENSG00000229980	ENSG00000229980.4	TOB1-AS1	50866679	50910774	1	lncRNA	TOB1 antisense RNA 1 [Source:HGNC Symbol;Acc:HGNC:44340]	21.9648	-1.64307	0.430402	7.98e-06	0.000223747	21	32	7	7	4	6	18.7197	26.8079	7.39734	6.28931	4.96771	6.74043	Down Regulated
ENSG00000253669	ENSG00000253669.3	GASAL1	102805517	102810039	1	lncRNA	growth arrest associated lncRNA 1 [Source:HGNC Symbol;Acc:HGNC:53461]	49.9571	1.27131	0.33635	8.35e-06	0.000233925	42	21	74	63	66	68	37.4395	17.5927	78.2005	56.6038	81.9672	76.3915	Up Regulated
ENSG00000232821	ENSG00000232821.1		19112474	19114271	1	lncRNA	novel transcript	94.4316	0.957815	0.254464	8.43e-06	0.000235605	112	123	205	202	184	202	99.8386	103.043	216.636	181.492	228.515	226.928	Up Regulated
ENSG00000260949	ENSG00000260949.1		38062881	38063791	1	lncRNA	novel transcript, overlapping to EIF4EBP1	37.0246	-1.04329	0.274137	8.77e-06	0.000243898	49	59	10	40	12	17	43.6794	49.4271	10.5676	35.9389	14.9031	19.0979	Down Regulated
ENSG00000261270	ENSG00000261270.1		56940278	56941342	1	lncRNA	novel transcript, sense intronic to HERPUD1	37.4552	-0.935261	0.247491	9.94e-06	0.000275421	58	77	28	28	22	28	51.7021	64.5065	29.5894	25.1573	27.3224	31.4553	Down Regulated
ENSG00000228352	ENSG00000228352.2		34084332	34096225	1	lncRNA	novel transcript	48.219	-1.03037	0.274462	1.05e-05	0.000289729	57	45	19	29	13	14	50.8107	37.6986	20.0785	26.0557	16.1451	15.7277	Down Regulated
ENSG00000257135	ENSG00000257135.6	ODC1-DT	10448654	10457693	1	lncRNA	ODC1 divergent transcript [Source:HGNC Symbol;Acc:HGNC:54070]	70.6402	-0.868207	0.229749	1.06e-05	0.000291232	92	90	30	48	41	32	82.0103	75.3973	31.7029	43.1267	50.919	35.949	Down Regulated
ENSG00000260339	ENSG00000260339.1	HEXA-AS1	72376051	72378788	1	lncRNA	HEXA antisense RNA 1 [Source:HGNC Symbol;Acc:HGNC:25810]	29.6136	-0.939402	0.250116	1.09e-05	0.000300202	54	63	22	32	16	22	48.1365	52.7781	23.2488	28.7512	19.8708	24.7149	Down Regulated
ENSG00000285106	ENSG00000285106.1	AC016831.7	130791264	131110161	-1	lncRNA	novel transcript	111.062	0.949468	0.256501	1.1e-05	0.000301644	84	133	175	204	132	221	74.8789	111.42	184.934	183.289	163.934	248.272	Up Regulated
ENSG00000224934	ENSG00000224934.4	GOT1-DT	99430915	99463259	1	lncRNA	GOT1 divergent transcript [Source:HGNC Symbol;Acc:HGNC:55848]	31.4766	-1.30454	0.35093	1.12e-05	0.000305969	37	55	13	17	11	13	32.9824	46.0761	13.7379	15.274	13.6612	14.6043	Down Regulated
ENSG00000280166	ENSG00000280166.1		72730557	72731175	1	lncRNA	TEC	28.9069	-1.70605	0.459808	1.15e-05	0.000312544	28	45	9	5	5	12	24.9596	37.6986	9.51087	4.49237	6.20963	13.4809	Down Regulated
ENSG00000271857	ENSG00000271857.1		45421079	45422005	-1	lncRNA	novel transcript, antisense to RUNX2	97.845	-0.761481	0.20042	1.15e-05	0.000312544	161	187	87	102	55	72	143.518	156.659	91.9384	91.6443	68.306	80.8851	Down Regulated
ENSG00000234197	ENSG00000234197.1	ETV5-AS1	186079170	186080947	1	lncRNA	ETV5 antisense RNA 1 [Source:HGNC Symbol;Acc:HGNC:40222]	102.375	-0.911482	0.241343	1.19e-05	0.000320008	142	159	52	79	48	64	126.581	133.202	54.9517	70.9794	59.6125	71.8979	Down Regulated
ENSG00000257953	ENSG00000257953.1		57837092	57842745	1	lncRNA	novel transcript, antisense to CTDSP2	17.9477	-2.01781	0.5427	1.19e-05	0.000320008	22	17	7	6	0	0	19.6112	14.2417	7.39734	5.39084	0	0	Down Regulated
ENSG00000256705	ENSG00000256705.3		101833435	101839531	-1	lncRNA	novel transcript, antisense to PPP2R5C	23.3551	-1.51652	0.414525	1.39e-05	0.000367549	21	34	7	3	7	10	18.7197	28.4834	7.39734	2.69542	8.69349	11.234	Down Regulated
ENSG00000255517	ENSG00000255517.6	DPP3-DT	66473490	66480296	-1	lncRNA	DPP3 divergent transcript [Source:HGNC Symbol;Acc:HGNC:55494]	129.336	-0.890733	0.240902	1.54e-05	0.00040452	252	216	82	120	82	98	224.637	180.953	86.6546	107.817	101.838	110.094	Down Regulated
ENSG00000286216	ENSG00000286216.1		247337886	247348076	-1	lncRNA	novel transcript	36.7478	-1.17573	0.322377	1.55e-05	0.000406584	38	43	15	24	5	9	33.8738	36.0231	15.8514	21.5634	6.20963	10.1106	Down Regulated
ENSG00000263847	ENSG00000263847.1		9112404	9115877	-1	lncRNA	novel transcript, antisense to NDUFV2	37.775	-0.94299	0.259668	1.58e-05	0.000414338	70	60	28	27	16	30	62.3991	50.2648	29.5894	24.2588	19.8708	33.7021	Down Regulated
ENSG00000271856	ENSG00000271856.1	LINC01215	108125821	108138610	1	lncRNA	long intergenic non-protein coding RNA 1215 [Source:HGNC Symbol;Acc:HGNC:49651]	29.8169	1.11061	0.309109	1.59e-05	0.000416646	41	46	86	93	65	92	36.5481	38.5364	90.8816	83.558	80.7253	103.353	Up Regulated
ENSG00000230751	ENSG00000230751.1		30140870	30141417	1	lncRNA	novel transcript	50.9515	-1.071	0.294075	1.64e-05	0.000425919	62	64	17	31	22	19	55.2678	53.6158	17.965	27.8527	27.3224	21.3447	Down Regulated
ENSG00000273445	ENSG00000273445.1		87477495	87478034	-1	lncRNA	novel transcript	49.0318	0.957534	0.265358	1.79e-05	0.000460918	47	39	62	86	76	70	41.8966	32.6721	65.5193	77.2687	94.3864	78.6383	Up Regulated
ENSG00000228067	ENSG00000228067.1	LINC01740	212545694	212556065	1	lncRNA	long intergenic non-protein coding RNA 1740 [Source:HGNC Symbol;Acc:HGNC:52528]	20.0215	1.41662	0.39824	1.85e-05	0.000471494	18	17	45	55	33	41	16.0455	14.2417	47.5543	49.416	40.9836	46.0596	Up Regulated
ENSG00000269506	ENSG00000269506.2		54059597	54061210	1	lncRNA	novel transcript, antisense to CHIC2	194.472	0.74765	0.205818	1.89e-05	0.000480355	138	128	185	252	165	174	123.015	107.232	195.501	226.415	204.918	195.472	Up Regulated
ENSG00000273066	ENSG00000273066.5		136799223	136810042	1	lncRNA	novel transcript	36.38	-1.02727	0.284002	1.91e-05	0.000484764	51	61	19	28	14	21	45.4622	51.1026	20.0785	25.1573	17.387	23.5915	Down Regulated
ENSG00000268403	ENSG00000268403.2		9459549	9460702	-1	lncRNA	novel transcript, antisense to ZNF143	117.818	0.697069	0.190831	1.91e-05	0.000484764	149	161	233	226	200	199	132.821	134.877	246.226	203.055	248.385	223.558	Up Regulated
ENSG00000276462	ENSG00000276462.1	LINC03025	41100793	41119909	-1	lncRNA	long intergenic non-protein coding RNA 3025 [Source:HGNC Symbol;Acc:HGNC:56158]	10.0102	3.20325	0.878978	1.92e-05	0.000486179	2	3	31	16	21	31	1.78283	2.51324	32.7597	14.3756	26.0805	34.8255	Up Regulated
ENSG00000279059	ENSG00000279059.1		54956760	54958426	-1	lncRNA	TEC	49.8484	-0.836692	0.229536	2.04e-05	0.00051222	80	83	30	32	31	45	71.3133	69.533	31.7029	28.7512	38.4997	50.5532	Down Regulated
ENSG00000203709	ENSG00000203709.11	MIR29B2CHG	207801518	207879115	-1	lncRNA	MIR29B2 and MIR29C host gene [Source:HGNC Symbol;Acc:HGNC:32018]	378.757	-0.463653	0.121646	2.08e-05	0.000521687	274	272	162	185	138	139	244.248	227.867	171.196	166.218	171.386	156.153	Down Regulated
ENSG00000253227	ENSG00000253227.1		124271667	124279580	1	lncRNA	novel transcript	42.678	1.04513	0.297496	2.11e-05	0.000528379	57	67	99	134	82	142	50.8107	56.1291	104.62	120.395	101.838	159.523	Up Regulated
ENSG00000239213	ENSG00000239213.5	NCK1-DT	136835345	136862618	-1	lncRNA	NCK1 divergent transcript [Source:HGNC Symbol;Acc:HGNC:49645]	152.11	-0.56081	0.150314	2.13e-05	0.000531364	219	240	125	135	100	124	195.22	201.059	132.095	121.294	124.193	139.302	Down Regulated
ENSG00000280087	ENSG00000280087.1		44909375	44914968	1	lncRNA	TEC	18.3077	-1.29895	0.370847	2.17e-05	0.000541149	46	82	20	17	16	20	41.0051	68.6953	21.1353	15.274	19.8708	22.4681	Down Regulated
ENSG00000281005	ENSG00000281005.1	LINC00921	3263743	3269151	1	lncRNA	long intergenic non-protein coding RNA 921 [Source:HGNC Symbol;Acc:HGNC:26830]	118.124	-0.66272	0.181251	2.19e-05	0.000544599	120	102	51	57	37	71	106.97	85.4502	53.8949	51.213	45.9513	79.7617	Down Regulated
ENSG00000229955	ENSG00000229955.1		38387918	38388857	-1	lncRNA	novel transcript, sense intronic to CSNK1E	18.9883	-1.64741	0.460997	2.27e-05	0.00056175	27	22	4	6	7	5	24.0682	18.4304	4.22705	5.39084	8.69349	5.61702	Down Regulated
ENSG00000224977	ENSG00000224977.1	RC3H1-DT	174022509	174023167	1	lncRNA	RC3H1 divergent transcript [Source:HGNC Symbol;Acc:HGNC:54295]	78.0187	1.04531	0.298696	2.32e-05	0.000572435	52	43	85	121	62	87	46.3536	36.0231	89.8249	108.715	76.9995	97.7362	Up Regulated
ENSG00000272631	ENSG00000272631.1		86749754	86756298	-1	lncRNA	novel transcript, antisense to BMPR1A	26.7138	-1.50688	0.429577	2.42e-05	0.00059413	31	46	13	11	8	6	27.6339	38.5364	13.7379	9.88321	9.93542	6.74043	Down Regulated
ENSG00000261118	ENSG00000261118.1		89492017	89504460	-1	lncRNA	novel transcript, antisense to SPG7	61.2281	-0.80269	0.224125	2.44e-05	0.00059762	86	116	47	51	38	39	76.6618	97.1787	49.6679	45.8221	47.1932	43.8128	Down Regulated
ENSG00000259488	ENSG00000259488.2	DUT-AS1	48312353	48331856	-1	lncRNA	DUT antisense RNA 1 [Source:HGNC Symbol;Acc:HGNC:55420]	77.5165	-0.803353	0.224701	2.45e-05	0.000600316	71	87	36	38	23	40	63.2905	72.884	38.0435	34.142	28.5643	44.9362	Down Regulated
ENSG00000279277	ENSG00000279277.2		108032456	108039916	-1	lncRNA	novel transcript	76.982	-0.827475	0.22874	2.47e-05	0.000605618	109	103	39	57	44	42	97.1643	86.288	41.2138	51.213	54.6448	47.183	Down Regulated
ENSG00000244926	ENSG00000244926.6	ALKBH3-AS1	43909289	43920944	-1	lncRNA	ALKBH3 antisense RNA 1 [Source:HGNC Symbol;Acc:HGNC:48670]	21.6705	-1.34269	0.386955	2.76e-05	0.000667494	35	51	19	9	8	12	31.1996	42.7251	20.0785	8.08626	9.93542	13.4809	Down Regulated
ENSG00000245573	ENSG00000245573.8	BDNF-AS	27506830	27698231	1	lncRNA	BDNF antisense RNA [Source:HGNC Symbol;Acc:HGNC:20608]	221.27	-0.443441	0.118449	2.89e-05	0.00069534	202	244	122	149	123	122	180.066	204.41	128.925	133.873	152.757	137.055	Down Regulated
ENSG00000269984	ENSG00000269984.1		169777192	169780334	-1	lncRNA	novel transcript, antisense to MYNN	56.7542	-0.769419	0.217317	2.95e-05	0.000708033	103	122	57	55	40	48	91.8159	102.205	60.2355	49.416	49.6771	53.9234	Down Regulated
ENSG00000276842	ENSG00000276842.1		25103124	25103869	-1	lncRNA	novel transcript, antisense to LRMP	110.862	-1.13448	0.326786	2.97e-05	0.000711275	64	79	22	34	27	12	57.0506	66.182	23.2488	30.5481	33.532	13.4809	Down Regulated
ENSG00000254653	ENSG00000254653.1		46116578	46117318	1	lncRNA	novel transcript	12.2565	-2.00282	0.575031	3.12e-05	0.000743828	19	20	2	5	2	4	16.9369	16.7549	2.11353	4.49237	2.48385	4.49362	Down Regulated
ENSG00000234608	ENSG00000234608.7	MAPKAPK5-AS1	111839758	111842902	-1	lncRNA	MAPKAPK5 antisense RNA 1 [Source:HGNC Symbol;Acc:HGNC:24091]	248.464	-0.389402	0.107352	3.22e-05	0.000766024	338	354	225	266	184	155	301.299	296.563	237.772	238.994	228.515	174.128	Down Regulated
ENSG00000269514	ENSG00000269514.2		48198357	48230275	1	lncRNA	novel transcript, antisense to OR10AD1	46.2118	-1.0923	0.311485	3.23e-05	0.000767768	40	76	16	24	21	19	35.6566	63.6688	16.9082	21.5634	26.0805	21.3447	Down Regulated
ENSG00000279946	ENSG00000279946.1		206541758	206544892	1	lncRNA	novel transcript, sense intronic to RASSF5	18.3284	2.79279	0.853228	3.39e-05	0.000801794	6	4	55	27	25	44	5.3485	3.35099	58.122	24.2588	31.0482	49.4298	Up Regulated
ENSG00000245748	ENSG00000245748.1		7030554	7046231	-1	lncRNA	novel transcript, antisense to TBC1D14 and TADA2B	17.1425	-1.30119	0.380708	3.49e-05	0.000821546	21	36	4	14	8	7	18.7197	30.1589	4.22705	12.5786	9.93542	7.86383	Down Regulated
ENSG00000258183	ENSG00000258183.5	LINC02392	90280894	90300974	1	lncRNA	long intergenic non-protein coding RNA 2392 [Source:HGNC Symbol;Acc:HGNC:53319]	21.1648	1.75013	0.538722	3.5e-05	0.000823156	17	34	92	94	80	66	15.1541	28.4834	97.2222	84.4565	99.3542	74.1447	Up Regulated
ENSG00000286108	ENSG00000286108.1		2107900	2109991	-1	lncRNA	novel transcript, antisense to STK35	41.7131	-1.01492	0.2955	3.51e-05	0.000823156	52	60	21	27	9	25	46.3536	50.2648	22.192	24.2588	11.1773	28.0851	Down Regulated
ENSG00000247828	ENSG00000247828.7	TMEM161B-DT	88268864	88439337	1	lncRNA	TMEM161B divergent transcript [Source:HGNC Symbol;Acc:HGNC:43839]	596.362	-0.471988	0.128702	3.72e-05	0.00086667	667	699	393	495	273	396	594.575	585.585	415.308	444.744	339.046	444.868	Down Regulated
ENSG00000231329	ENSG00000231329.8		139144204	139239653	-1	lncRNA	novel transcript	362.971	-0.663067	0.18741	3.73e-05	0.000867907	400	424	206	225	155	212	356.566	355.205	217.693	202.157	192.499	238.162	Down Regulated
ENSG00000269961	ENSG00000269961.1	ERBIN-DT	65924629	65925135	-1	lncRNA	ERBIN divergent transcript [Source:HGNC Symbol;Acc:HGNC:55270]	29.3089	1.05225	0.305867	3.74e-05	0.00087008	22	21	43	44	41	32	19.6112	17.5927	45.4408	39.5328	50.919	35.949	Up Regulated
ENSG00000235481	ENSG00000235481.2	UBE2R2-AS1	33732970	33818795	-1	lncRNA	UBE2R2 antisense RNA 1 [Source:HGNC Symbol;Acc:HGNC:49911]	52.1531	-0.955809	0.274849	3.76e-05	0.000871878	52	93	25	39	16	32	46.3536	77.9105	26.4191	35.0405	19.8708	35.949	Down Regulated
ENSG00000212694	ENSG00000212694.8	LINC01089	121795267	121803906	-1	lncRNA	long intergenic non-protein coding RNA 1089 [Source:HGNC Symbol;Acc:HGNC:27886]	121.58	-0.924396	0.266178	3.76e-05	0.000871878	130	161	57	82	44	48	115.884	134.877	60.2355	73.6748	54.6448	53.9234	Down Regulated
ENSG00000271889	ENSG00000271889.1		61151433	61162105	-1	lncRNA	novel transcript	23.2583	-1.25231	0.367722	3.92e-05	0.000907836	33	52	11	13	15	12	29.4167	43.5629	11.6244	11.6802	18.6289	13.4809	Down Regulated
ENSG00000267197	ENSG00000267197.1		10490339	10491000	-1	lncRNA	novel transcript, sense intronic with KEAP1	15.7965	-1.51521	0.4469	4.11e-05	0.000946833	20	44	14	3	5	9	17.8283	36.8609	14.7947	2.69542	6.20963	10.1106	Down Regulated
ENSG00000246334	ENSG00000246334.2	PRR7-AS1	177438503	177447982	-1	lncRNA	PRR7 antisense RNA 1 [Source:HGNC Symbol;Acc:HGNC:27961]	101.616	-0.809142	0.235293	4.22e-05	0.000969552	153	140	55	93	57	49	136.387	117.285	58.122	83.558	70.7898	55.0468	Down Regulated
ENSG00000261094	ENSG00000261094.2		122937623	122940333	1	lncRNA	novel transcript	31.2483	-0.957242	0.283163	4.3e-05	0.000985273	74	80	21	29	35	31	65.9648	67.0198	22.192	26.0557	43.4674	34.8255	Down Regulated
ENSG00000279744	ENSG00000279744.1		82462601	82464255	1	lncRNA	TEC	45.5008	-0.936255	0.271089	4.32e-05	0.000990197	63	57	27	35	10	23	56.1592	47.7516	28.5326	31.4466	12.4193	25.8383	Down Regulated
ENSG00000238287	ENSG00000238287.1	EXO5-DT	40493157	40508661	-1	lncRNA	EXO5 divergent transcript [Source:HGNC Symbol;Acc:HGNC:55647]	274.313	-0.527745	0.147767	4.41e-05	0.00100656	336	438	234	231	179	189	299.516	366.933	247.283	207.547	222.305	212.324	Down Regulated
ENSG00000231119	ENSG00000231119.2		47352561	47354633	1	lncRNA	novel transcript, antisense to ZMYND8	25.3685	-1.39656	0.417996	4.45e-05	0.00101582	23	26	5	4	6	11	20.5026	21.7814	5.28382	3.59389	7.45156	12.3575	Down Regulated
ENSG00000243701	ENSG00000243701.6	DUBR	107220744	107348464	1	lncRNA	DPPA2 upstream binding RNA [Source:HGNC Symbol;Acc:HGNC:48569]	38.5563	-0.863253	0.257369	4.61e-05	0.00104861	58	75	17	45	25	22	51.7021	62.831	17.965	40.4313	31.0482	24.7149	Down Regulated
ENSG00000259767	ENSG00000259767.1		83022236	83024336	-1	lncRNA	novel transcript, sense intronic to BTBD1	23.333	-1.37075	0.406762	4.66e-05	0.00105791	28	30	8	10	5	9	24.9596	25.1324	8.45411	8.98473	6.20963	10.1106	Down Regulated
ENSG00000228274	ENSG00000228274.3		38667585	38681860	-1	lncRNA	novel transcript, antisense to CBY1	77.2272	-0.706515	0.207675	5.02e-05	0.00112681	135	134	50	84	51	66	120.341	112.258	52.8382	75.4718	63.3383	74.1447	Down Regulated
ENSG00000272145	ENSG00000272145.1	NFYC-AS1	40690380	40692074	-1	lncRNA	NFYC antisense RNA 1 [Source:HGNC Symbol;Acc:HGNC:49451]	1692.52	-0.395498	0.108583	5.55e-05	0.00123837	2197	2412	1418	1599	1186	1331	1958.44	2020.65	1498.49	1436.66	1472.93	1495.25	Down Regulated
ENSG00000278811	ENSG00000278811.4	LINC00624	147258885	147517875	-1	lncRNA	long intergenic non-protein coding RNA 624 [Source:HGNC Symbol;Acc:HGNC:44254]	146.194	-0.627435	0.183124	5.61e-05	0.00124596	184	201	80	118	87	97	164.021	168.387	84.5411	106.02	108.048	108.97	Down Regulated
ENSG00000224086	ENSG00000224086.5	PPM1F-AS1	21938269	21977632	1	lncRNA	PPM1F antisense RNA 1 [Source:HGNC Symbol;Acc:HGNC:40888]	301.235	-0.52908	0.151962	5.72e-05	0.00126517	359	391	213	233	166	194	320.018	327.559	225.091	209.344	206.16	217.941	Down Regulated
ENSG00000261096	ENSG00000261096.1		231809846	231812352	1	lncRNA	novel transcript	10.2088	-1.96593	0.602223	5.95e-05	0.00131273	19	23	4	5	3	2	16.9369	19.2682	4.22705	4.49237	3.72578	2.24681	Down Regulated
ENSG00000225280	ENSG00000225280.6		21397740	21400391	1	lncRNA	novel transcript, antisense to NKX2-4	53.9956	-0.860911	0.261121	6.08e-05	0.00133999	69	52	26	24	24	25	61.5077	43.5629	27.4758	21.5634	29.8062	28.0851	Down Regulated
ENSG00000229625	ENSG00000229625.3		98961428	98968284	1	lncRNA	novel transcript	43.6339	1.21763	0.370354	6.15e-05	0.00135189	18	11	21	49	23	33	16.0455	9.21522	22.192	44.0252	28.5643	37.0724	Up Regulated
ENSG00000244513	ENSG00000244513.6	EOGT-DT	69013941	69056622	1	lncRNA	EOGT divergent transcript [Source:HGNC Symbol;Acc:HGNC:55605]	104.204	-0.675675	0.20042	6.27e-05	0.00136979	139	126	49	85	51	69	123.907	105.556	51.7814	76.3702	63.3383	77.5149	Down Regulated
ENSG00000249870	ENSG00000249870.1		51042524	51085471	1	lncRNA	novel transcript	42.6252	1.09814	0.346831	6.53e-05	0.00141682	36	68	81	102	79	140	32.091	56.9668	85.5978	91.6443	98.1122	157.277	Up Regulated
ENSG00000279838	ENSG00000279838.1		185292384	185294372	-1	lncRNA	TEC	291.429	-0.585803	0.170924	6.53e-05	0.00141682	587	526	291	342	244	270	523.261	440.655	307.518	307.278	303.03	303.319	Down Regulated
ENSG00000269399	ENSG00000269399.2		16542746	16544814	1	lncRNA	novel transcript	18.1281	-1.33473	0.417371	7.14e-05	0.0015354	36	51	19	10	7	12	32.091	42.7251	20.0785	8.98473	8.69349	13.4809	Down Regulated
ENSG00000253549	ENSG00000253549.5	CA3-AS1	85440596	85464915	-1	lncRNA	CA3 antisense RNA 1 [Source:HGNC Symbol;Acc:HGNC:51657]	27.0797	1.58247	0.492441	7.17e-05	0.0015387	6	12	28	28	24	24	5.3485	10.053	29.5894	25.1573	29.8062	26.9617	Up Regulated
ENSG00000235770	ENSG00000235770.5	LINC00607	215611563	215848954	-1	lncRNA	long intergenic non-protein coding RNA 607 [Source:HGNC Symbol;Acc:HGNC:43944]	38.1041	0.782763	0.241155	7.25e-05	0.00155403	81	84	129	125	120	121	72.2047	70.3708	136.322	112.309	149.031	135.932	Up Regulated
ENSG00000232934	ENSG00000232934.7		112395813	112425589	-1	lncRNA	novel transcript, antisense to ACSL5	58.9624	0.890912	0.277935	7.41e-05	0.00158181	51	55	70	103	89	87	45.4622	46.0761	73.9734	92.5428	110.531	97.7362	Up Regulated
ENSG00000258137	ENSG00000258137.5	GPR84-AS1	54353661	54497688	1	lncRNA	GPR84, ZNF385A, ITGA5 and GTSF1 antisense RNA 1 [Source:HGNC Symbol;Acc:HGNC:56187]	32.8788	1.09695	0.349655	7.52e-05	0.00159896	39	38	70	85	74	72	34.7652	31.8344	73.9734	76.3702	91.9026	80.8851	Up Regulated
ENSG00000232043	ENSG00000232043.1		50570975	50578041	-1	lncRNA	novel transcript, antisense to PTPN1	119.158	0.595851	0.175099	7.62e-05	0.0016199	103	148	170	174	126	173	91.8159	123.987	179.65	156.334	156.483	194.349	Up Regulated
ENSG00000269220	ENSG00000269220.1	LINC00528	17777322	17779481	1	lncRNA	long intergenic non-protein coding RNA 528 [Source:HGNC Symbol;Acc:HGNC:26875]	49.9702	0.82255	0.255093	7.67e-05	0.00162712	48	71	98	94	83	94	42.788	59.4801	103.563	84.4565	103.08	105.6	Up Regulated
ENSG00000223692	ENSG00000223692.1	DIP2A-IT1	46462471	46469306	1	lncRNA	DIP2A intronic transcript 1 [Source:HGNC Symbol;Acc:HGNC:41430]	10.3076	-1.66394	0.51885	7.99e-05	0.00168617	17	23	3	3	4	7	15.1541	19.2682	3.17029	2.69542	4.96771	7.86383	Down Regulated
ENSG00000223462	ENSG00000223462.2		44937508	44955725	1	lncRNA	novel transcript	17.6425	-1.64149	0.518094	8.12e-05	0.00171371	18	24	5	4	4	5	16.0455	20.1059	5.28382	3.59389	4.96771	5.61702	Down Regulated
ENSG00000205018	ENSG00000205018.2		88939789	88951524	1	lncRNA	novel transcript, antisense to CBFA2T3	16.8548	1.66904	0.530751	8.28e-05	0.0017456	6	11	29	22	26	28	5.3485	9.21522	30.6461	19.7664	32.2901	31.4553	Up Regulated
ENSG00000284994	ENSG00000284994.1		135327758	135330743	1	lncRNA	novel transcript	26.8338	-1.12244	0.346963	8.61e-05	0.00180305	37	36	11	13	9	16	32.9824	30.1589	11.6244	11.6802	11.1773	17.9745	Down Regulated
ENSG00000227908	ENSG00000227908.3	IL6ST-DT	55995153	56003649	1	lncRNA	IL6ST divergent transcript [Source:HGNC Symbol;Acc:HGNC:55804]	14.9036	1.55737	0.499564	8.63e-05	0.00180437	7	14	30	24	33	31	6.23991	11.7285	31.7029	21.5634	40.9836	34.8255	Up Regulated
ENSG00000223842	ENSG00000223842.1		219222248	219225497	-1	lncRNA	novel transcript	83.027	-0.630552	0.19099	8.66e-05	0.00180698	118	149	52	81	60	70	105.187	124.824	54.9517	72.7764	74.5156	78.6383	Down Regulated
ENSG00000274020	ENSG00000274020.3	LINC01138	148290889	148519604	-1	lncRNA	long intergenic non-protein coding RNA 1138 [Source:HGNC Symbol;Acc:HGNC:49454]	260.324	-0.466025	0.135615	8.73e-05	0.00181613	321	343	208	223	136	187	286.145	287.347	219.807	200.36	168.902	210.077	Down Regulated
ENSG00000271151	ENSG00000271151.1		173968351	173969418	1	lncRNA	novel transcript	24.3646	-0.996979	0.3152	8.8e-05	0.00182643	37	51	14	21	16	13	32.9824	42.7251	14.7947	18.8679	19.8708	14.6043	Down Regulated
ENSG00000236526	ENSG00000236526.1	BTBD3-AS1	11909404	11918677	-1	lncRNA	BTBD3 antisense RNA 1 [Source:HGNC Symbol;Acc:HGNC:40728]	85.9198	-0.79854	0.247954	8.8e-05	0.00182643	99	104	41	48	34	51	88.2502	87.1257	43.3273	43.1267	42.2255	57.2936	Down Regulated
ENSG00000273363	ENSG00000273363.1		44958917	44959458	-1	lncRNA	novel transcript	14.9378	-1.41007	0.447917	8.88e-05	0.00183759	23	21	3	11	1	8	20.5026	17.5927	3.17029	9.88321	1.24193	8.98724	Down Regulated
ENSG00000249816	ENSG00000249816.6	LINC00964	124823702	124962531	1	lncRNA	long intergenic non-protein coding RNA 964 [Source:HGNC Symbol;Acc:HGNC:27226]	31.7259	0.683265	0.209834	8.92e-05	0.0018439	64	79	102	120	84	93	57.0506	66.182	107.79	107.817	104.322	104.477	Up Regulated
ENSG00000270562	ENSG00000270562.1	FOXP1-DT	71584943	71587409	1	lncRNA	FOXP1 divergent transcript [Source:HGNC Symbol;Acc:HGNC:56284]	464.272	-0.555898	0.165539	9e-05	0.00185219	631	584	329	376	249	327	562.484	489.244	347.675	337.826	309.24	367.353	Down Regulated
ENSG00000230177	ENSG00000230177.1	AL080317.1	111277932	111278742	1	lncRNA	novel transcript	173.666	-0.533651	0.163466	9e-05	0.00185219	272	357	151	219	131	165	242.465	299.076	159.571	196.766	162.692	185.362	Down Regulated
ENSG00000242094	ENSG00000242094.1	FOXP1-IT1	71570255	71574457	-1	lncRNA	FOXP1 intronic transcript 1 [Source:HGNC Symbol;Acc:HGNC:41335]	506.122	-0.622981	0.18823	9.16e-05	0.00187791	498	561	251	311	196	295	443.925	469.976	265.248	279.425	243.418	331.404	Down Regulated
ENSG00000260475	ENSG00000260475.1	SLC25A28-DT	99620857	99621931	1	lncRNA	SLC25A28 divergent transcript [Source:HGNC Symbol;Acc:HGNC:55979]	14.8731	1.74479	0.532271	9.32e-05	0.00190394	3	7	17	15	16	18	2.67425	5.86423	17.965	13.4771	19.8708	20.2213	Up Regulated
ENSG00000233096	ENSG00000233096.1		40970541	40971578	-1	lncRNA	novel transcript	28.1859	1.19153	0.384655	0.000103376	0.00209141	17	17	28	59	25	35	15.1541	14.2417	29.5894	53.0099	31.0482	39.3192	Up Regulated
ENSG00000250790	ENSG00000250790.4		132911470	132914732	1	lncRNA	novel transcript	25.5157	-1.00008	0.32249	0.000107592	0.00216163	37	36	10	20	10	13	32.9824	30.1589	10.5676	17.9695	12.4193	14.6043	Down Regulated
ENSG00000265206	ENSG00000265206.5	MIR142HG	58330879	58332523	-1	lncRNA	MIR142 host genes [Source:HGNC Symbol;Acc:HGNC:55980]	164.081	-1.12279	0.359441	0.000111706	0.00223544	200	238	79	66	68	71	178.283	199.384	83.4843	59.2993	84.451	79.7617	Down Regulated
ENSG00000260924	ENSG00000260924.2	LINC01311	19171395	19172851	1	lncRNA	long intergenic non-protein coding RNA 1311 [Source:HGNC Symbol;Acc:HGNC:50503]	29.915	-0.780108	0.247663	0.000112153	0.00224053	70	89	37	41	29	31	62.3991	74.5595	39.1002	36.8374	36.0159	34.8255	Down Regulated
ENSG00000231104	ENSG00000231104.8		118017487	118045810	1	lncRNA	novel transcript, antisense to RAB11FIP2	30.4592	-0.889644	0.287394	0.000116309	0.00230935	50	46	16	22	18	20	44.5708	38.5364	16.9082	19.7664	22.3547	22.4681	Down Regulated
ENSG00000261618	ENSG00000261618.2	LINC02605	78835307	78840525	1	lncRNA	long intergenic non-protein coding RNA 2605 [Source:HGNC Symbol;Acc:HGNC:53974]	12.9068	4.37994	1.65112	0.000120275	0.00238343	3	1	69	68	44	76	2.67425	0.837747	72.9167	61.0962	54.6448	85.3788	Up Regulated
ENSG00000225342	ENSG00000225342.2	LRRK2-DT	40186009	40224915	-1	lncRNA	LRRK2 divergent transcript [Source:HGNC Symbol;Acc:HGNC:40848]	13.9493	-1.25791	0.414181	0.000121435	0.00240408	28	32	5	12	6	12	24.9596	26.8079	5.28382	10.7817	7.45156	13.4809	Down Regulated
ENSG00000273175	ENSG00000273175.1		244863782	244865295	1	lncRNA	novel transcript	32.5035	-1.06448	0.349089	0.000121849	0.00240993	41	26	14	12	5	15	36.5481	21.7814	14.7947	10.7817	6.20963	16.8511	Down Regulated
ENSG00000259682	ENSG00000259682.1		64470253	64471364	1	lncRNA	novel transcript, sense intronic to ZNF609	21.4128	-1.20129	0.390959	0.000122746	0.0024206	30	53	12	16	10	13	26.7425	44.4006	12.6812	14.3756	12.4193	14.6043	Down Regulated
ENSG00000279679	ENSG00000279679.1		143375628	143375883	-1	lncRNA	TEC	41.9251	-0.868646	0.28143	0.000123766	0.00243598	52	65	22	26	18	28	46.3536	54.4536	23.2488	23.3603	22.3547	31.4553	Down Regulated
ENSG00000232539	ENSG00000232539.1	LINC00945	33057829	33064983	1	lncRNA	long intergenic non-protein coding RNA 945 [Source:HGNC Symbol;Acc:HGNC:48643]	18.3239	-1.17462	0.384397	0.000124828	0.00245214	31	41	8	12	10	15	27.6339	34.3476	8.45411	10.7817	12.4193	16.8511	Down Regulated
ENSG00000279901	ENSG00000279901.1		2683106	2684764	1	lncRNA	tec	14.8029	-1.1713	0.387304	0.00012824	0.00251187	45	41	14	18	11	11	40.1137	34.3476	14.7947	16.1725	13.6612	12.3575	Down Regulated
ENSG00000238054	ENSG00000238054.2		188869474	188888540	-1	lncRNA	novel transcript	18.1351	-1.38144	0.459509	0.000131257	0.00256356	24	45	4	12	7	13	21.394	37.6986	4.22705	10.7817	8.69349	14.6043	Down Regulated
ENSG00000260034	ENSG00000260034.1	LCMT1-AS2	25140577	25149032	-1	lncRNA	LCMT1 antisense RNA 2 [Source:HGNC Symbol;Acc:HGNC:51178]	126.809	-0.623381	0.19682	0.000136598	0.00266019	115	129	53	67	65	55	102.513	108.069	56.0085	60.1977	80.7253	61.7873	Down Regulated
ENSG00000254649	ENSG00000254649.1		78388061	78392405	1	lncRNA	novel transcript	14.1692	-1.60322	0.536306	0.000140446	0.00272728	20	26	2	7	6	5	17.8283	21.7814	2.11353	6.28931	7.45156	5.61702	Down Regulated
ENSG00000203684	ENSG00000203684.5	IBA57-DT	228164086	228165512	-1	lncRNA	IBA57 divergent transcript [Source:HGNC Symbol;Acc:HGNC:32062]	24.8717	-1.01616	0.336537	0.000141347	0.00274216	41	66	17	25	12	22	36.5481	55.2913	17.965	22.4618	14.9031	24.7149	Down Regulated
ENSG00000260288	ENSG00000260288.3		75737820	75763322	1	lncRNA	novel transcript	16.3444	-1.26752	0.423267	0.000147578	0.00285214	27	40	8	16	3	12	24.0682	33.5099	8.45411	14.3756	3.72578	13.4809	Down Regulated
ENSG00000272137	ENSG00000272137.1		79561132	79561602	1	lncRNA	novel transcript	18.0027	-1.19806	0.40256	0.000148839	0.00287079	46	62	12	15	13	25	41.0051	51.9403	12.6812	13.4771	16.1451	28.0851	Down Regulated
ENSG00000277978	ENSG00000277978.1		66565620	66566001	-1	lncRNA	novel transcript, antisense to CKLF	17.6397	-1.21192	0.410129	0.000153291	0.00294296	23	36	10	5	12	8	20.5026	30.1589	10.5676	4.49237	14.9031	8.98724	Down Regulated
ENSG00000180539	ENSG00000180539.7	LINC02908	137027464	137037957	1	lncRNA	long intergenic non-protein coding RNA 2908 [Source:HGNC Symbol;Acc:HGNC:31426]	448.297	-0.813718	0.264608	0.000153819	0.0029503	777	768	328	408	230	344	692.63	643.39	346.618	366.577	285.643	386.451	Down Regulated
ENSG00000254791	ENSG00000254791.1	FAR1-IT1	13669327	13670149	1	lncRNA	FAR1 intronic transcript 1 [Source:HGNC Symbol;Acc:HGNC:41485]	25.6486	-1.3818	0.466911	0.000156998	0.00299994	15	41	4	8	5	12	13.3712	34.3476	4.22705	7.18779	6.20963	13.4809	Down Regulated
ENSG00000285374	ENSG00000285374.1		84607099	84610697	1	lncRNA	novel transcript	32.2369	-0.95125	0.318834	0.000159382	0.00303694	38	52	14	18	14	21	33.8738	43.5629	14.7947	16.1725	17.387	23.5915	Down Regulated
ENSG00000273486	ENSG00000273486.1		136837338	136839021	-1	lncRNA	novel transcript, antisense to SLC35G2	134.598	-0.573683	0.180799	0.000160037	0.00304654	171	187	85	107	70	107	152.432	156.659	89.8249	96.1367	86.9349	120.204	Down Regulated
ENSG00000259456	ENSG00000259456.3	ADNP-AS1	50930984	50945148	1	lncRNA	ADNP antisense RNA 1 [Source:HGNC Symbol;Acc:HGNC:51227]	87.0534	0.622014	0.200421	0.000161993	0.00307513	89	97	118	153	90	137	79.336	81.2615	124.698	137.466	111.773	153.906	Up Regulated
ENSG00000271882	ENSG00000271882.1		101208148	101208558	1	lncRNA	novel transcript	99.309	0.587347	0.18692	0.000164922	0.00312782	74	73	90	132	77	84	65.9648	61.1556	95.1087	118.599	95.6284	94.366	Up Regulated
ENSG00000261390	ENSG00000261390.5	MAFTRR	79715220	79770651	-1	lncRNA	MAF transcriptional regulator RNA [Source:HGNC Symbol;Acc:HGNC:51525]	132.261	-0.89117	0.297371	0.000167689	0.00317438	74	94	29	40	24	39	65.9648	78.7482	30.6461	35.9389	29.8062	43.8128	Down Regulated
ENSG00000260616	ENSG00000260616.6		50783859	50803338	-1	lncRNA	novel transcript, antisense to CYLD	13.2973	1.61394	0.552411	0.000169189	0.00319562	5	11	22	28	18	30	4.45708	9.21522	23.2488	25.1573	22.3547	33.7021	Up Regulated
ENSG00000250413	ENSG00000250413.1	SLC2A9-AS1	10006482	10009725	1	lncRNA	SLC2A9 antisense RNA 1 [Source:HGNC Symbol;Acc:HGNC:40636]	14.1146	-1.98196	0.658908	0.000170009	0.00320634	14	14	1	6	1	1	12.4798	11.7285	1.05676	5.39084	1.24193	1.1234	Down Regulated
ENSG00000271555	ENSG00000271555.1		52722903	52723141	1	lncRNA	novel transcript, sense intronic KANK1	15.4004	1.57129	0.563841	0.000173192	0.0032573	14	17	32	66	49	39	12.4798	14.2417	33.8164	59.2993	60.8544	43.8128	Up Regulated
ENSG00000271474	ENSG00000271474.1	UNC5C-AS1	95549129	95552457	1	lncRNA	UNC5C antisense RNA 1 [Source:HGNC Symbol;Acc:HGNC:55246]	57.3454	-1.037	0.352445	0.000175067	0.00328951	54	39	22	19	11	13	48.1365	32.6721	23.2488	17.071	13.6612	14.6043	Down Regulated
ENSG00000258820	ENSG00000258820.5		75259411	75271950	1	lncRNA	novel transcript, antisense to a novel orphan protein	19.208	1.48866	0.505303	0.00018181	0.00339683	7	9	17	30	15	27	6.23991	7.53973	17.965	26.9542	18.6289	30.3319	Up Regulated
ENSG00000235138	ENSG00000235138.1		134054290	134058805	1	lncRNA	novel transcript, antisense to BRD3	30.0087	-1.26685	0.432992	0.000186297	0.00346844	24	39	13	6	7	10	21.394	32.6721	13.7379	5.39084	8.69349	11.234	Down Regulated
ENSG00000235560	ENSG00000235560.3	ZNF747-DT	30534752	30537149	1	lncRNA	ZNF747 divergent transcript [Source:HGNC Symbol;Acc:HGNC:55668]	20.0247	-1.00822	0.344339	0.000187693	0.00348167	33	54	18	21	6	17	29.4167	45.2384	19.0217	18.8679	7.45156	19.0979	Down Regulated
ENSG00000259116	ENSG00000259116.2	HSPA2-AS1	64513952	64540368	-1	lncRNA	HSPA2 and ZBTB1 antisense RNA 1 [Source:HGNC Symbol;Acc:HGNC:55433]	63.4645	-0.759861	0.250228	0.000187693	0.00348167	65	107	31	42	27	51	57.942	89.639	32.7597	37.7359	33.532	57.2936	Down Regulated
ENSG00000236810	ENSG00000236810.5	ELOA-AS1	23706901	23778325	-1	lncRNA	ELOA antisense RNA 1 [Source:HGNC Symbol;Acc:HGNC:50582]	23.8171	-0.932488	0.317986	0.000190568	0.00351893	47	36	18	18	13	14	41.8966	30.1589	19.0217	16.1725	16.1451	15.7277	Down Regulated
ENSG00000246763	ENSG00000246763.6	RGMB-AS1	98769618	98773469	-1	lncRNA	RGMB antisense RNA 1 [Source:HGNC Symbol;Acc:HGNC:48666]	45.7779	-0.741988	0.246696	0.000196321	0.0036153	196	220	123	84	69	92	174.718	184.304	129.982	75.4718	85.693	103.353	Down Regulated
ENSG00000274667	ENSG00000274667.1		56729932	56730611	-1	lncRNA	novel transcript, sense intronic to	16.7225	-1.17851	0.410113	0.000200757	0.00368696	32	35	12	11	10	8	28.5253	29.3212	12.6812	9.88321	12.4193	8.98724	Down Regulated
ENSG00000227917	ENSG00000227917.2		100804	110138	-1	lncRNA	novel transcript	80.226	0.88725	0.302742	0.000213246	0.00388291	25	25	46	56	28	39	22.2854	20.9437	48.6111	50.3145	34.774	43.8128	Up Regulated
ENSG00000237301	ENSG00000237301.1		15586136	15603626	-1	lncRNA	novel transcript	13.99	-1.24063	0.436407	0.000216296	0.00392619	24	28	6	6	7	11	21.394	23.4569	6.34058	5.39084	8.69349	12.3575	Down Regulated
ENSG00000234206	ENSG00000234206.5		107509803	107511721	-1	lncRNA	novel transcript	38.2755	-1.20394	0.42277	0.000217341	0.00393812	23	24	8	3	6	11	20.5026	20.1059	8.45411	2.69542	7.45156	12.3575	Down Regulated
ENSG00000286153	ENSG00000286153.1		34836286	34884882	1	lncRNA	novel transcript, antisense to RUNX1	540.928	0.480266	0.153935	0.000218163	0.00394948	464	513	568	658	521	562	413.617	429.764	600.242	591.196	647.044	631.353	Up Regulated
ENSG00000266900	ENSG00000266900.1		62245810	62247412	1	lncRNA	novel transcript, sense intronic to KIAA1468	54.4246	-1.02948	0.360186	0.000226261	0.00407431	51	64	18	20	22	19	45.4622	53.6158	19.0217	17.9695	27.3224	21.3447	Down Regulated
ENSG00000215068	ENSG00000215068.7	ANXA2R-AS1	43041572	43064272	1	lncRNA	ANXA2R antisense RNA 1 [Source:HGNC Symbol;Acc:HGNC:27208]	890.705	-0.419622	0.130435	0.00022919	0.00411974	622	649	324	519	297	360	554.461	543.698	342.391	466.308	368.852	404.426	Down Regulated
ENSG00000234684	ENSG00000234684.6	SDCBP2-AS1	1325400	1378735	1	lncRNA	SDCBP2 antisense RNA 1 [Source:HGNC Symbol;Acc:HGNC:44314]	126.851	-0.461199	0.146774	0.000243897	0.00436864	137	145	86	96	65	72	122.124	121.473	90.8816	86.2535	80.7253	80.8851	Down Regulated
ENSG00000225335	ENSG00000225335.3		18076527	18078884	-1	lncRNA	novel transcript	30.0952	-0.878206	0.30746	0.000244357	0.00437151	63	55	30	27	22	14	56.1592	46.0761	31.7029	24.2588	27.3224	15.7277	Down Regulated
ENSG00000233538	ENSG00000233538.1		231452195	231453153	1	lncRNA	novel transcript	23.1773	1.03686	0.363103	0.000244488	0.00437151	18	16	28	38	30	34	16.0455	13.404	29.5894	34.142	37.2578	38.1958	Up Regulated
ENSG00000269439	ENSG00000269439.5	PGLS-DT	17488990	17511889	-1	lncRNA	PGLS divergent transcript [Source:HGNC Symbol;Acc:HGNC:55274]	116.047	-0.534481	0.174696	0.000250758	0.0044679	174	249	117	123	75	132	155.106	208.599	123.641	110.512	93.1445	148.289	Down Regulated
ENSG00000270959	ENSG00000270959.1	LPP-AS2	188151206	188154069	-1	lncRNA	LPP antisense RNA 2 [Source:HGNC Symbol;Acc:HGNC:27952]	97.6198	0.574142	0.19187	0.000262973	0.00466393	75	112	128	137	107	108	66.8562	93.8277	135.266	123.091	132.886	121.328	Up Regulated
ENSG00000235204	ENSG00000235204.1		124259250	124261156	-1	lncRNA	novel transcript	80.7768	-0.585034	0.19563	0.000263138	0.00466393	100	146	63	61	66	57	89.1416	122.311	66.5761	54.8069	81.9672	64.0341	Down Regulated
ENSG00000261386	ENSG00000261386.2		67549214	67563958	-1	lncRNA	novel transcript	25.9452	-0.975626	0.348242	0.000266775	0.00471604	29	35	6	12	18	10	25.8511	29.3212	6.34058	10.7817	22.3547	11.234	Down Regulated
ENSG00000257097	ENSG00000257097.1	CLIP1-AS1	122395542	122400857	1	lncRNA	CLIP1 antisense RNA 1 [Source:HGNC Symbol;Acc:HGNC:48586]	22.9997	-0.994111	0.354816	0.000269175	0.00474198	30	49	9	16	8	23	26.7425	41.0496	9.51087	14.3756	9.93542	25.8383	Down Regulated
ENSG00000236200	ENSG00000236200.5	KDM4A-AS1	43685123	43708138	-1	lncRNA	KDM4A antisense RNA 1 [Source:HGNC Symbol;Acc:HGNC:40528]	393.915	-0.454983	0.145804	0.000269657	0.00474607	347	348	188	239	172	190	309.321	291.536	198.671	214.735	213.611	213.447	Down Regulated
ENSG00000234694	ENSG00000234694.1	CDC20-DT	43354684	43358676	-1	lncRNA	CDC20 divergent transcript [Source:HGNC Symbol;Acc:HGNC:55681]	35.2052	-0.866822	0.311667	0.00028312	0.00495753	55	42	18	16	22	20	49.0279	35.1854	19.0217	14.3756	27.3224	22.4681	Down Regulated
ENSG00000280383	ENSG00000280383.1		45657019	45680130	1	lncRNA	novel transcript, sense overlapping ATXN10	218.055	-0.550628	0.18362	0.00029461	0.00512339	238	328	154	156	114	163	212.157	274.781	162.742	140.162	141.58	183.115	Down Regulated
ENSG00000285621	ENSG00000285621.1		33335497	33349619	1	lncRNA	novel transcript, antisense to STARD13	293.597	-0.633103	0.215952	0.000304658	0.00527105	258	419	152	187	113	202	229.985	351.016	160.628	168.015	140.338	226.928	Down Regulated
ENSG00000279433	ENSG00000279433.1		77108284	77110537	-1	lncRNA	TEC	192.125	-0.850041	0.3023	0.000318475	0.00548673	113	194	71	82	52	42	100.73	162.523	75.0302	73.6748	64.5802	47.183	Down Regulated
ENSG00000231507	ENSG00000231507.1	LINC01353	203273221	203288804	1	lncRNA	long intergenic non-protein coding RNA 1353 [Source:HGNC Symbol;Acc:HGNC:50580]	45.8718	0.853782	0.30773	0.000320533	0.00551283	31	31	67	59	42	37	27.6339	25.9702	70.8031	53.0099	52.1609	41.566	Up Regulated
ENSG00000268030	ENSG00000268030.1		18557775	18561560	-1	lncRNA	novel transcript, antisense to KXD1	38.3623	-0.709919	0.252054	0.000325812	0.00559417	58	73	25	35	29	29	51.7021	61.1556	26.4191	31.4466	36.0159	32.5787	Down Regulated
ENSG00000238099	ENSG00000238099.2	LINC01625	139435636	139474658	-1	lncRNA	long intergenic non-protein coding RNA 1625 [Source:HGNC Symbol;Acc:HGNC:52052]	24.1578	-1.38545	0.513682	0.000329234	0.00563862	29	22	11	8	4	3	25.8511	18.4304	11.6244	7.18779	4.96771	3.37021	Down Regulated
ENSG00000228369	ENSG00000228369.2	TXNDC12-AS1	52050918	52052683	1	lncRNA	TXNDC12 antisense RNA 1 [Source:HGNC Symbol;Acc:HGNC:30008]	16.9686	-1.22293	0.44684	0.000335247	0.00573193	22	24	9	7	7	4	19.6112	20.1059	9.51087	6.28931	8.69349	4.49362	Down Regulated
ENSG00000232031	ENSG00000232031.1		81724722	81736353	-1	lncRNA	novel transcript	123.308	-0.597622	0.205582	0.000338472	0.00578221	135	144	61	95	58	66	120.341	120.636	64.4626	85.355	72.0318	74.1447	Down Regulated
ENSG00000236896	ENSG00000236896.1		97986551	97987656	-1	lncRNA	novel transcript	29.8829	-1.0642	0.392071	0.000342792	0.00585108	27	37	13	17	0	13	24.0682	30.9967	13.7379	15.274	0	14.6043	Down Regulated
ENSG00000248318	ENSG00000248318.1		120761253	120776832	1	lncRNA	novel transcript	285.823	-0.62343	0.214844	0.000343253	0.00585403	276	417	133	230	129	187	246.031	349.341	140.55	206.649	160.209	210.077	Down Regulated
ENSG00000234945	ENSG00000234945.7	GTF3C2-AS1	27335520	27342599	1	lncRNA	GTF3C2 antisense RNA 1 [Source:HGNC Symbol;Acc:HGNC:40269]	18.5861	-1.22449	0.456222	0.000345181	0.00587287	27	39	11	9	6	12	24.0682	32.6721	11.6244	8.08626	7.45156	13.4809	Down Regulated
ENSG00000267575	ENSG00000267575.6	LINC02987	27793431	27984984	1	lncRNA	long intergenic non-protein coding RNA 2987 [Source:HGNC Symbol;Acc:HGNC:56093]	171.866	-0.44656	0.146759	0.000356055	0.00603688	244	292	131	196	118	167	217.506	244.622	138.436	176.101	146.547	187.609	Down Regulated
ENSG00000267737	ENSG00000267737.1		78315729	78347798	1	lncRNA	novel transcript	19.1109	1.22552	0.456358	0.000357109	0.0060497	17	6	25	34	18	29	15.1541	5.02648	26.4191	30.5481	22.3547	32.5787	Up Regulated
ENSG00000224358	ENSG00000224358.1	TMCO1-AS1	165768929	165775176	1	lncRNA	TMCO1 antisense RNA 1 [Source:HGNC Symbol;Acc:HGNC:54046]	67.5472	-0.58295	0.200341	0.000359383	0.00608315	145	149	76	111	53	61	129.255	124.824	80.314	99.7306	65.8221	68.5277	Down Regulated
ENSG00000231808	ENSG00000231808.2	LINC01388	112713	113754	-1	lncRNA	long intergenic non-protein coding RNA 1388 [Source:HGNC Symbol;Acc:HGNC:50660]	386.676	0.50657	0.172278	0.000360036	0.00608913	184	204	238	294	206	210	164.021	170.9	251.51	264.151	255.837	235.915	Up Regulated
ENSG00000286154	ENSG00000286154.1		218799729	218802554	-1	lncRNA	novel transcript, antisense to CYP27A1	54.6575	-0.75126	0.2697	0.000362442	0.00611628	96	91	40	46	35	42	85.5759	76.235	42.2705	41.3298	43.4674	47.183	Down Regulated
ENSG00000254027	ENSG00000254027.1	LNMICC	81279871	81281446	-1	lncRNA	lncRNA associated with lymph node metastasis in cervical cancer [Source:HGNC Symbol;Acc:HGNC:56001]	27.3079	-1.06785	0.397313	0.000364727	0.006148	47	48	14	22	17	10	41.8966	40.2119	14.7947	19.7664	21.1128	11.234	Down Regulated
ENSG00000285728	ENSG00000285728.1		42658687	42682207	-1	lncRNA	novel transcript, antisense to PPIH	129.929	-0.476189	0.15908	0.000365147	0.00614997	203	211	104	129	132	92	180.957	176.765	109.903	115.903	163.934	103.353	Down Regulated
ENSG00000233912	ENSG00000233912.1		5156905	5187329	-1	lncRNA	novel transcript, antisense to ARL8B	67.2657	0.862307	0.318479	0.000370352	0.00623248	25	42	46	70	48	59	22.2854	35.1854	48.6111	62.8931	59.6125	66.2809	Up Regulated
ENSG00000228852	ENSG00000228852.6		95243167	95278940	-1	lncRNA	novel transcript, antisense to RWDD3	50.8147	-0.706095	0.253179	0.000372521	0.00626378	76	87	35	26	32	53	67.7476	72.884	36.9867	23.3603	39.7417	59.5405	Down Regulated
ENSG00000279500	ENSG00000279500.1		128813186	128814750	-1	lncRNA	novel transcript	24.0881	-1.11214	0.417792	0.000377636	0.00632884	31	52	17	11	16	8	27.6339	43.5629	17.965	9.88321	19.8708	8.98724	Down Regulated
ENSG00000179523	ENSG00000179523.4	EIF3J-DT	44527257	44537046	-1	lncRNA	EIF3J divergent transcript [Source:HGNC Symbol;Acc:HGNC:48616]	87.4028	-0.47772	0.1605	0.000382098	0.00639307	131	174	88	104	69	77	116.776	145.768	92.9952	93.4412	85.693	86.5022	Down Regulated
ENSG00000233061	ENSG00000233061.1	TTLL7-IT1	83979118	83984300	-1	lncRNA	TTLL7 intronic transcript 1 [Source:HGNC Symbol;Acc:HGNC:41486]	29.6028	-1.12803	0.424659	0.000382539	0.00639518	28	31	11	10	5	11	24.9596	25.9702	11.6244	8.98473	6.20963	12.3575	Down Regulated
ENSG00000261226	ENSG00000261226.1		88936779	88939651	-1	lncRNA	novel transcript	28.599	1.2382	0.472639	0.000388832	0.00648436	8	19	36	41	17	32	7.13133	15.9172	38.0435	36.8374	21.1128	35.949	Up Regulated
ENSG00000228506	ENSG00000228506.2	PNISR-AS1	99424911	99432326	1	lncRNA	PNISR antisense RNA 1 [Source:HGNC Symbol;Acc:HGNC:40958]	284.902	-0.310903	0.0975018	0.000414658	0.00686993	346	398	213	264	217	255	308.43	333.423	225.091	237.197	269.498	286.468	Down Regulated
ENSG00000231731	ENSG00000231731.7		127455394	127514623	1	lncRNA	novel transcript, antisense to IWS1	137.925	-0.553438	0.194474	0.000429203	0.00708202	167	253	101	129	82	120	148.866	211.95	106.733	115.903	101.838	134.809	Down Regulated
ENSG00000249786	ENSG00000249786.7	EAF1-AS1	15436171	15455940	-1	lncRNA	EAF1 antisense RNA 1 [Source:HGNC Symbol;Acc:HGNC:42328]	42.2949	0.715761	0.262334	0.000454295	0.00745192	42	30	63	55	43	51	37.4395	25.1324	66.5761	49.416	53.4029	57.2936	Up Regulated
ENSG00000276744	ENSG00000276744.1		75452964	75453947	-1	lncRNA	novel transcript, sense intronic to SIN3A	25.9463	-1.03871	0.393224	0.000458277	0.00749478	27	38	12	11	11	10	24.0682	31.8344	12.6812	9.88321	13.6612	11.234	Down Regulated
ENSG00000234162	ENSG00000234162.2		105874509	105962386	-1	lncRNA	novel transcript, antisense to NCK2	44.5568	0.959709	0.359706	0.000465412	0.00759923	15	16	24	34	26	29	13.3712	13.404	25.3623	30.5481	32.2901	32.5787	Up Regulated
ENSG00000270137	ENSG00000270137.1		132826179	132826903	1	lncRNA	novel transcript, intronic to PHF20L1	26.902	-0.768368	0.286746	0.000466067	0.00760381	46	47	22	32	11	15	41.0051	39.3741	23.2488	28.7512	13.6612	16.8511	Down Regulated
ENSG00000250950	ENSG00000250950.1		119456350	119457277	1	lncRNA	novel transcript	17.2113	-0.9817	0.378501	0.000484088	0.00784115	25	33	10	14	7	10	22.2854	27.6457	10.5676	12.5786	8.69349	11.234	Down Regulated
ENSG00000280039	ENSG00000280039.1	RN7SKP23	23412380	23416680	1	lncRNA	RN7SK pseudogene 23 [Source:HGNC Symbol;Acc:HGNC:45747]	41.8673	-0.758622	0.275825	0.000487067	0.00788312	52	51	19	26	24	21	46.3536	42.7251	20.0785	23.3603	29.8062	23.5915	Down Regulated
ENSG00000232788	ENSG00000232788.1	ITGA6-AS1	172464262	172466022	-1	lncRNA	ITGA6 antisense RNA 1 [Source:HGNC Symbol;Acc:HGNC:40308]	19.1858	0.967144	0.373813	0.000487902	0.00789034	24	17	29	43	35	44	21.394	14.2417	30.6461	38.6344	43.4674	49.4298	Up Regulated
ENSG00000257285	ENSG00000257285.5	PRMT5-DT	22929607	22956436	1	lncRNA	PRMT5 divergent transcript [Source:HGNC Symbol;Acc:HGNC:55482]	25.4083	-0.95472	0.363312	0.000491633	0.00793187	31	42	13	14	14	12	27.6339	35.1854	13.7379	12.5786	17.387	13.4809	Down Regulated
ENSG00000263990	ENSG00000263990.1		31873926	31886666	1	lncRNA	novel transcript	45.698	-0.651374	0.241583	0.000497818	0.00801879	57	75	30	34	27	33	50.8107	62.831	31.7029	30.5481	33.532	37.0724	Down Regulated
ENSG00000285410	ENSG00000285410.1	GABPB1-IT1	50348936	50354861	-1	lncRNA	GABPB1 intronic transcript [Source:HGNC Symbol;Acc:HGNC:25469]	453.465	0.321538	0.0978234	0.000510347	0.00820109	483	498	487	616	422	492	430.554	417.198	514.644	553.46	524.093	552.715	Up Regulated
ENSG00000280069	ENSG00000280069.1		30738182	30740275	1	lncRNA	TEC	195.974	-0.608343	0.220292	0.000511812	0.00821812	139	163	53	94	58	92	123.907	136.553	56.0085	84.4565	72.0318	103.353	Down Regulated
ENSG00000249379	ENSG00000249379.1		53503109	53507660	1	lncRNA	novel transcript	18.5487	-1.23907	0.488848	0.000514747	0.00825221	30	38	11	9	6	12	26.7425	31.8344	11.6244	8.08626	7.45156	13.4809	Down Regulated
ENSG00000267758	ENSG00000267758.1		42268587	42269807	1	lncRNA	novel transcript	19.4569	-1.01905	0.405273	0.000517122	0.00828374	26	31	7	6	12	13	23.1768	25.9702	7.39734	5.39084	14.9031	14.6043	Down Regulated
ENSG00000267254	ENSG00000267254.6	ZNF790-AS1	36797501	36831596	1	lncRNA	ZNF790 antisense RNA 1 [Source:HGNC Symbol;Acc:HGNC:27617]	47.8761	-0.598064	0.220739	0.000519663	0.00831789	51	79	38	33	17	40	45.4622	66.182	40.157	29.6496	21.1128	44.9362	Down Regulated
ENSG00000233367	ENSG00000233367.1		6415145	6449558	-1	lncRNA	novel transcript	24.1146	-0.956969	0.366602	0.00052045	0.00832392	36	34	14	14	7	16	32.091	28.4834	14.7947	12.5786	8.69349	17.9745	Down Regulated
ENSG00000273343	ENSG00000273343.1		20318119	20318749	-1	lncRNA	novel transcript, sense intronic to DGCR6L	16.1153	-1.41649	0.552574	0.000528	0.00842477	15	18	1	3	2	10	13.3712	15.0795	1.05676	2.69542	2.48385	11.234	Down Regulated
ENSG00000245904	ENSG00000245904.3	BTG1-DT	92145573	92226557	1	lncRNA	BTG1 divergent transcript [Source:HGNC Symbol;Acc:HGNC:55600]	162.161	0.569312	0.208324	0.000528871	0.00843205	179	223	271	290	224	253	159.563	186.818	286.383	260.557	278.192	284.221	Up Regulated
ENSG00000279347	ENSG00000279347.1		119838736	119840385	-1	lncRNA	TEC	30.3192	-1.09346	0.42403	0.000533497	0.00848582	23	27	6	5	13	8	20.5026	22.6192	6.34058	4.49237	16.1451	8.98724	Down Regulated
ENSG00000262265	ENSG00000262265.2		47160398	47167723	-1	lncRNA	novel transcript, sense intronic to CDC27	85.0409	-0.699133	0.261411	0.000535959	0.008505	54	88	23	49	23	34	48.1365	73.7218	24.3056	44.0252	28.5643	38.1958	Down Regulated
ENSG00000230046	ENSG00000230046.1	BIRC6-AS1	32377631	32379599	-1	lncRNA	BIRC6 antisense RNA 1 [Source:HGNC Symbol;Acc:HGNC:40641]	13.5583	-1.40591	0.554024	0.000537841	0.0085282	14	33	1	10	1	11	12.4798	27.6457	1.05676	8.98473	1.24193	12.3575	Down Regulated
ENSG00000226167	ENSG00000226167.1	AP4B1-AS1	113856635	113901237	1	lncRNA	AP4B1 antisense RNA 1 [Source:HGNC Symbol;Acc:HGNC:44114]	30.3863	-0.738155	0.279991	0.000542313	0.0085924	40	61	24	24	17	23	35.6566	51.1026	25.3623	21.5634	21.1128	25.8383	Down Regulated
ENSG00000269982	ENSG00000269982.1		9958717	9962539	1	lncRNA	novel transcript, antisense to TMEM111	96.8958	-0.530794	0.189493	0.000545883	0.0086355	120	128	71	82	47	62	106.97	107.232	75.0302	73.6748	58.3706	69.6511	Down Regulated
ENSG00000283118	ENSG00000283118.1		144444848	144450450	1	lncRNA	novel transcript, antisense to ZEB2	538.213	0.511659	0.184154	0.000548514	0.00866362	405	587	616	690	497	628	361.023	491.758	650.966	619.947	617.238	705.498	Up Regulated
ENSG00000278600	ENSG00000278600.1		79920195	79922455	-1	lncRNA	novel transcript, sense intronic to ST20	398.574	-0.386443	0.129187	0.000551024	0.00868857	580	646	391	415	300	360	517.021	541.185	413.194	372.867	372.578	404.426	Down Regulated
ENSG00000226312	ENSG00000226312.7	CFLAR-AS1	201140278	201157823	-1	lncRNA	CFLAR antisense RNA 1 [Source:HGNC Symbol;Acc:HGNC:14437]	289.502	0.727952	0.284889	0.000554315	0.00871459	292	326	444	509	293	609	260.293	273.106	469.203	457.323	363.885	684.154	Up Regulated
ENSG00000273729	ENSG00000273729.1		77028086	77031572	1	lncRNA	novel transcript, antisense to IRF2BPL	19.3201	-0.918147	0.359267	0.00056047	0.00878129	36	30	15	9	9	16	32.091	25.1324	15.8514	8.08626	11.1773	17.9745	Down Regulated
ENSG00000283122	ENSG00000283122.1	HYMAI	144004916	144008262	-1	lncRNA	hydatidiform mole associated and imprinted [Source:HGNC Symbol;Acc:HGNC:5326]	50.098	0.819956	0.315675	0.00057064	0.00890233	19	34	37	63	33	40	16.9369	28.4834	39.1002	56.6038	40.9836	44.9362	Up Regulated
ENSG00000255165	ENSG00000255165.1		44071462	44072403	1	lncRNA	novel transcript	26.7366	-0.894863	0.350282	0.000600112	0.00930043	37	36	12	22	4	18	32.9824	30.1589	12.6812	19.7664	4.96771	20.2213	Down Regulated
ENSG00000256897	ENSG00000256897.1		47220218	47221751	-1	lncRNA	novel transcript	13.4537	-1.38671	0.54891	0.000614012	0.00949148	16	16	5	6	2	3	14.2627	13.404	5.28382	5.39084	2.48385	3.37021	Down Regulated
ENSG00000228988	ENSG00000228988.1		70218589	70221023	-1	lncRNA	novel transcript	21.5791	0.887402	0.350515	0.000639557	0.00984143	17	25	45	48	32	21	15.1541	20.9437	47.5543	43.1267	39.7417	23.5915	Up Regulated
ENSG00000277767	ENSG00000277767.1		110916004	110917827	1	lncRNA	novel transcript	76.6817	0.5145	0.1874	0.000664484	0.0101558	86	86	103	127	89	107	76.6618	72.0463	108.847	114.106	110.531	120.204	Up Regulated
ENSG00000279957	ENSG00000279957.1		113904086	113905258	1	lncRNA	TEC	90.7994	0.596903	0.226696	0.000669597	0.0102262	83	122	146	134	115	147	73.9875	102.205	154.287	120.395	142.822	165.141	Up Regulated
ENSG00000257613	ENSG00000257613.1	LINC01481	70219132	70221862	-1	lncRNA	novel transcript	64.8122	-0.707854	0.274276	0.000685217	0.0104334	55	90	30	47	21	32	49.0279	75.3973	31.7029	42.2283	26.0805	35.949	Down Regulated
ENSG00000264434	ENSG00000264434.2		25302126	25302960	1	lncRNA	novel transcript, antisense to ZNF521	60.2768	-0.880344	0.352506	0.000686677	0.0104362	30	63	19	25	14	13	26.7425	52.7781	20.0785	22.4618	17.387	14.6043	Down Regulated
ENSG00000261460	ENSG00000261460.1		72278867	72351794	1	lncRNA	novel transcript, antisense to HEXA and CELF6	27.5799	-0.884473	0.356741	0.000694894	0.0105412	29	45	13	15	10	18	25.8511	37.6986	13.7379	13.4771	12.4193	20.2213	Down Regulated
ENSG00000255389	ENSG00000255389.1		111599875	111602295	1	lncRNA	chromosome 6 open reading frame 3	61.0718	-0.700901	0.272424	0.00069733	0.0105703	71	76	33	40	31	28	63.2905	63.6688	34.8732	35.9389	38.4997	31.4553	Down Regulated
ENSG00000272754	ENSG00000272754.1		32321638	32323002	1	lncRNA	novel transcript	29.239	-0.951917	0.387575	0.000698567	0.0105811	21	41	7	12	10	15	18.7197	34.3476	7.39734	10.7817	12.4193	16.8511	Down Regulated
ENSG00000272247	ENSG00000272247.1		158801257	158801935	-1	lncRNA	novel transcript, antisense to MFSD1	19.3349	1.2075	0.475151	0.000699419	0.0105861	8	7	14	22	15	18	7.13133	5.86423	14.7947	19.7664	18.6289	20.2213	Up Regulated
ENSG00000279331	ENSG00000279331.1	RBM12B-AS1	93740121	93740773	1	lncRNA	RBM12B antisense RNA 1 [Source:HGNC Symbol;Acc:HGNC:28818]	95.269	-0.54099	0.201867	0.000721527	0.0108802	124	130	67	78	40	79	110.536	108.907	70.8031	70.0809	49.6771	88.749	Down Regulated
ENSG00000253522	ENSG00000253522.6	MIR3142HG	160438594	160487426	1	lncRNA	MIR3142 host gene [Source:HGNC Symbol;Acc:HGNC:51944]	169.655	0.876191	0.374148	0.000723668	0.0108963	275	270	571	515	389	419	245.139	226.192	603.412	462.714	483.11	470.707	Up Regulated
ENSG00000280193	ENSG00000280193.1		81696368	81698694	1	lncRNA	TEC	65.3063	-0.53818	0.20247	0.000733593	0.011005	77	98	41	64	30	47	68.639	82.0992	43.3273	57.5023	37.2578	52.8	Down Regulated
ENSG00000275178	ENSG00000275178.1		77093086	77093446	1	lncRNA	novel transcript, antisense to MBP	39.3127	-0.923535	0.37685	0.00073673	0.0110357	32	56	15	16	9	24	28.5253	46.9139	15.8514	14.3756	11.1773	26.9617	Down Regulated
ENSG00000272777	ENSG00000272777.1		99067256	99068125	-1	lncRNA	novel transcript	23.5694	-1.05817	0.440043	0.000754314	0.0112329	34	39	8	15	15	9	30.3081	32.6721	8.45411	13.4771	18.6289	10.1106	Down Regulated
ENSG00000231794	ENSG00000231794.5		135198401	135209837	1	lncRNA	novel transcript, antisense to WDR91	54.3146	-0.885852	0.36601	0.000788917	0.0116711	36	32	18	9	16	8	32.091	26.8079	19.0217	8.08626	19.8708	8.98724	Down Regulated
ENSG00000232978	ENSG00000232978.2		19291337	19292576	-1	lncRNA	novel transcript	25.0589	-1.02432	0.433917	0.000818109	0.0120591	28	37	8	2	15	17	24.9596	30.9967	8.45411	1.79695	18.6289	19.0979	Down Regulated
ENSG00000272335	ENSG00000272335.1		44826076	44828592	1	lncRNA	novel transcript	468.017	-0.395709	0.13908	0.000819619	0.0120675	365	415	237	257	217	208	325.367	347.665	250.453	230.908	269.498	233.668	Down Regulated
ENSG00000197670	ENSG00000197670.6		53552770	53575863	1	lncRNA	novel transcript, antisense to ZNF217	174.308	-0.472218	0.17498	0.000819869	0.0120675	265	263	146	200	94	146	236.225	220.328	154.287	179.695	116.741	164.017	Down Regulated
ENSG00000276449	ENSG00000276449.1		57449689	57453011	1	lncRNA	novel transcript	28.5513	-0.785461	0.320982	0.000848325	0.0124323	42	61	21	28	20	16	37.4395	51.1026	22.192	25.1573	24.8385	17.9745	Down Regulated
ENSG00000224505	ENSG00000224505.2	HEXIM2-AS1	45150400	45161538	-1	lncRNA	HEXIM2 antisense RNA 1 [Source:HGNC Symbol;Acc:HGNC:55857]	54.8646	-0.529202	0.200497	0.000852342	0.0124463	99	103	53	56	43	59	88.2502	86.288	56.0085	50.3145	53.4029	66.2809	Down Regulated
ENSG00000238186	ENSG00000238186.1		40515754	40517174	-1	lncRNA	novel transcript	171.594	-0.475668	0.175466	0.000863347	0.0125708	156	221	112	116	86	99	139.061	185.142	118.357	104.223	106.806	111.217	Down Regulated
ENSG00000266378	ENSG00000266378.1		14327335	14329474	1	lncRNA	novel transcript	13.8252	1.27003	0.558719	0.00088718	0.0128534	7	14	27	30	15	33	6.23991	11.7285	28.5326	26.9542	18.6289	37.0724	Up Regulated
ENSG00000283538	ENSG00000283538.2		62910021	62968549	-1	lncRNA	novel transcript	17.6404	-1.13586	0.482273	0.000890445	0.0128823	26	17	4	7	7	8	23.1768	14.2417	4.22705	6.28931	8.69349	8.98724	Down Regulated
ENSG00000278969	ENSG00000278969.1		24902309	24904681	1	lncRNA	novel transcript	52.9623	-0.743513	0.300152	0.00092935	0.0133312	59	93	36	35	14	46	52.5935	77.9105	38.0435	31.4466	17.387	51.6766	Down Regulated
ENSG00000259442	ENSG00000259442.1		82744223	82750289	1	lncRNA	novel transcript, antisense FSD2	22.3771	-1.01222	0.438831	0.000954576	0.0136737	35	19	10	8	7	11	31.1996	15.9172	10.5676	7.18779	8.69349	12.3575	Down Regulated
ENSG00000285774	ENSG00000285774.1	SAMD4A-AS1	54684026	54729324	-1	lncRNA	SAMD4A antisense RNA 1 [Source:HGNC Symbol;Acc:HGNC:54803]	40.5308	0.789685	0.33522	0.000968818	0.0138387	29	44	58	70	49	58	25.8511	36.8609	61.2923	62.8931	60.8544	65.1575	Up Regulated
ENSG00000267034	ENSG00000267034.1	AC010980.2	222317242	222318653	-1	lncRNA	novel transcript	56.5902	0.872563	0.396706	0.00102191	0.0144951	132	102	258	186	185	189	117.667	85.4502	272.645	167.116	229.756	212.324	Up Regulated
ENSG00000260774	ENSG00000260774.1		213898	217279	-1	lncRNA	novel transcript	15.8339	-1.24767	0.558479	0.00109517	0.0153838	10	24	7	3	1	7	8.91416	20.1059	7.39734	2.69542	1.24193	7.86383	Down Regulated
ENSG00000236536	ENSG00000236536.1		19117773	19121920	1	lncRNA	novel transcript	17.2186	0.825657	0.356433	0.00111661	0.0156203	27	17	31	46	30	41	24.0682	14.2417	32.7597	41.3298	37.2578	46.0596	Up Regulated
ENSG00000235381	ENSG00000235381.1		155253139	155256724	-1	lncRNA	novel transcript	89.8609	-0.476523	0.182862	0.00113286	0.0157932	113	139	71	87	56	62	100.73	116.447	75.0302	78.1672	69.5479	69.6511	Down Regulated
ENSG00000214353	ENSG00000214353.7	VAC14-AS1	70755035	70773251	1	lncRNA	VAC14 antisense RNA 1 [Source:HGNC Symbol;Acc:HGNC:48605]	112.727	-0.438814	0.165032	0.00115369	0.0160286	200	258	124	148	110	135	178.283	216.139	131.039	132.974	136.612	151.66	Down Regulated
ENSG00000281026	ENSG00000281026.1	N4BP2L2-IT2	32504506	32509395	-1	lncRNA	N4BPL2 intronic transcript 2 [Source:HGNC Symbol;Acc:HGNC:25038]	715.173	-0.41673	0.154151	0.00115672	0.0160596	681	913	394	586	334	533	607.054	764.863	416.365	526.505	414.804	598.775	Down Regulated
ENSG00000270116	ENSG00000270116.1		37100814	37101343	1	lncRNA	novel transcript, sense intronic to TTC3	27.7044	-0.804567	0.349513	0.00116965	0.0162171	52	51	24	17	16	25	46.3536	42.7251	25.3623	15.274	19.8708	28.0851	Down Regulated
ENSG00000245025	ENSG00000245025.2		22984596	23019335	-1	lncRNA	novel transcript, antisense to RHOBTB2	28.3756	-0.790877	0.344211	0.00117507	0.01627	29	34	14	13	10	14	25.8511	28.4834	14.7947	11.6802	12.4193	15.7277	Down Regulated
ENSG00000266904	ENSG00000266904.5	LINC00663	19757366	19776423	-1	lncRNA	long intergenic non-protein coding RNA 663 [Source:HGNC Symbol;Acc:HGNC:28609]	29.1162	-0.735832	0.315936	0.00118212	0.016323	35	35	17	21	8	14	31.1996	29.3212	17.965	18.8679	9.93542	15.7277	Down Regulated
ENSG00000278467	ENSG00000278467.1		223994262	223995196	1	lncRNA	novel transcript	59.6249	-0.54703	0.220132	0.00118618	0.0163679	90	156	64	78	52	56	80.2274	130.689	67.6328	70.0809	64.5802	62.9107	Down Regulated
ENSG00000281392	ENSG00000281392.1	LINC00506	87089129	87158363	1	lncRNA	long intergenic non-protein coding RNA 506 [Source:NCBI gene (formerly Entrezgene);Acc:100846978]	29.8561	-0.937633	0.412344	0.00120477	0.0165682	26	26	12	6	8	11	23.1768	21.7814	12.6812	5.39084	9.93542	12.3575	Down Regulated
ENSG00000226674	ENSG00000226674.10	TEX41	144666312	145262988	1	lncRNA	testis expressed 41 [Source:HGNC Symbol;Acc:HGNC:48667]	1054.76	0.43862	0.169557	0.00124909	0.0171314	964	1113	1260	1383	984	1208	859.325	932.413	1331.52	1242.59	1222.06	1357.07	Up Regulated
ENSG00000278017	ENSG00000278017.1		62525919	62526793	-1	lncRNA	novel transcript, antisense to ZCCHC2	42.3248	-0.562701	0.228903	0.00125672	0.0172243	67	107	44	44	32	54	59.7249	89.639	46.4976	39.5328	39.7417	60.6639	Down Regulated
ENSG00000225793	ENSG00000225793.2	TMEM30A-DT	75284992	75317525	1	lncRNA	TMEM30A divergent transcript [Source:HGNC Symbol;Acc:HGNC:48985]	217.114	-0.392444	0.149644	0.00130719	0.0178438	305	277	159	220	133	174	271.882	232.056	168.025	197.664	165.176	195.472	Down Regulated
ENSG00000234678	ENSG00000234678.2	ELF3-AS1	201995696	202010463	-1	lncRNA	ELF3 antisense RNA 1 [Source:HGNC Symbol;Acc:HGNC:40211]	102.248	-0.566083	0.233197	0.00134918	0.0183353	79	92	49	46	31	45	70.4219	77.0728	51.7814	41.3298	38.4997	50.5532	Down Regulated
ENSG00000286196	ENSG00000286196.1		127754534	127760560	1	lncRNA	Novel transcript, antisense to SH2D3C	17.9843	-0.923033	0.422118	0.00134965	0.0183353	26	23	6	14	4	11	23.1768	19.2682	6.34058	12.5786	4.96771	12.3575	Down Regulated
ENSG00000274885	ENSG00000274885.1	AC087241.4	22638464	22638943	1	lncRNA	novel transcript	35.9745	-0.846461	0.379866	0.00135099	0.0183353	42	59	23	21	15	18	37.4395	49.4271	24.3056	18.8679	18.6289	20.2213	Down Regulated
ENSG00000237705	ENSG00000237705.1		56842016	56862164	-1	lncRNA	novel transcript	37.4377	-1.0279	0.473665	0.00135132	0.0183353	13	35	11	12	3	5	11.5884	29.3212	11.6244	10.7817	3.72578	5.61702	Down Regulated
ENSG00000232098	ENSG00000232098.3	ZNF584-DT	58404238	58408484	-1	lncRNA	ZNF584 divergent transcript [Source:HGNC Symbol;Acc:HGNC:56027]	120.386	-0.477713	0.188942	0.00141043	0.019061	135	151	73	112	49	80	120.341	126.5	77.1437	100.629	60.8544	89.8724	Down Regulated
ENSG00000230773	ENSG00000230773.8		47924181	48314224	-1	lncRNA	novel transcript	28.717	-0.793287	0.360231	0.00148199	0.0198563	32	39	16	18	7	16	28.5253	32.6721	16.9082	16.1725	8.69349	17.9745	Down Regulated
ENSG00000259073	ENSG00000259073.1	FOXN3-AS2	89576216	89577477	1	lncRNA	FOXN3 antisense RNA 2 [Source:HGNC Symbol;Acc:HGNC:30119]	39.907	-0.957819	0.442325	0.00149008	0.0199515	36	44	16	15	11	13	32.091	36.8609	16.9082	13.4771	13.6612	14.6043	Down Regulated
ENSG00000279204	ENSG00000279204.1		159106380	159108617	1	lncRNA	TEC	6.52496	1.47551	0.799826	0.00149345	0.0199704	8	12	34	35	34	26	7.13133	10.053	35.9299	31.4466	42.2255	29.2085	Up Regulated
ENSG00000232679	ENSG00000232679.1	LINC01705	222010825	222064773	-1	lncRNA	long intergenic non-protein coding RNA 1705 [Source:HGNC Symbol;Acc:HGNC:52493]	9.53706	1.01401	0.50283	0.00149454	0.0199718	19	24	63	38	41	33	16.9369	20.1059	66.5761	34.142	50.919	37.0724	Up Regulated
ENSG00000285103	ENSG00000285103.2		27529085	27543902	1	lncRNA	novel transcript	80.8335	-0.581307	0.24539	0.00149988	0.0199905	79	98	55	38	33	47	70.4219	82.0992	58.122	34.142	40.9836	52.8	Down Regulated
ENSG00000250764	ENSG00000250764.1		32103445	32121941	-1	lncRNA	novel transcript	73.0983	-0.612241	0.262667	0.00150405	0.0200329	38	70	31	32	17	23	33.8738	58.6423	32.7597	28.7512	21.1128	25.8383	Down Regulated
ENSG00000266111	ENSG00000266111.2		29352069	29404105	1	lncRNA	novel transcript	21.589	-0.871413	0.40451	0.00151275	0.0201225	29	46	13	12	12	18	25.8511	38.5364	13.7379	10.7817	14.9031	20.2213	Down Regulated
ENSG00000245105	ENSG00000245105.3	A2M-AS1	9065163	9068689	1	lncRNA	A2M antisense RNA 1 [Source:HGNC Symbol;Acc:HGNC:27057]	34.544	-0.917203	0.416927	0.00157138	0.0207529	43	71	30	15	21	15	38.3309	59.4801	31.7029	13.4771	26.0805	16.8511	Down Regulated
ENSG00000272482	ENSG00000272482.1		12618900	12619980	-1	lncRNA	novel transcript	90.9625	0.594889	0.262029	0.00159593	0.021036	130	131	211	186	177	134	115.884	109.745	222.977	167.116	219.821	150.536	Up Regulated
ENSG00000267694	ENSG00000267694.1		13461020	13470823	-1	lncRNA	novel transcript, antisense C18orf1	22.2477	-0.99507	0.467966	0.0016248	0.0213474	24	45	8	19	7	12	21.394	37.6986	8.45411	17.071	8.69349	13.4809	Down Regulated
ENSG00000241169	ENSG00000241169.1		27457198	27459582	1	lncRNA	novel transcript	20.5192	-0.880857	0.416053	0.00165119	0.0216437	29	50	12	12	13	20	25.8511	41.8874	12.6812	10.7817	16.1451	22.4681	Down Regulated
ENSG00000272849	ENSG00000272849.1		121797511	121801972	1	lncRNA	novel transcript	25.2764	-0.88903	0.418124	0.00172237	0.0223605	21	42	21	12	5	8	18.7197	35.1854	22.192	10.7817	6.20963	8.98724	Down Regulated
ENSG00000227706	ENSG00000227706.3		67878316	67889339	-1	lncRNA	novel transcript	3718.13	-0.371708	0.141077	0.00172675	0.022397	814	837	509	617	412	452	725.613	701.195	537.892	554.358	511.674	507.779	Down Regulated
ENSG00000232748	ENSG00000232748.3		31056460	31062803	1	lncRNA	novel transcript, antisense to ZNF668	24.0541	-0.70801	0.326983	0.00177265	0.0229484	37	40	17	15	20	14	32.9824	33.5099	17.965	13.4771	24.8385	15.7277	Down Regulated
ENSG00000245526	ENSG00000245526.10	LINC00461	88507546	88691057	-1	lncRNA	long intergenic non-protein coding RNA 461 [Source:HGNC Symbol;Acc:HGNC:42810]	16.5085	-1.55067	0.738632	0.00179124	0.0231449	9	9	1	1	3	2	8.02274	7.53973	1.05676	0.898473	3.72578	2.24681	Down Regulated
ENSG00000236065	ENSG00000236065.2		32987075	33032469	1	lncRNA	novel transcript	25.4066	-0.968731	0.476162	0.00181875	0.0234406	23	31	9	12	7	8	20.5026	25.9702	9.51087	10.7817	8.69349	8.98724	Down Regulated
ENSG00000276390	ENSG00000276390.1		47699401	47699917	-1	lncRNA	novel transcript, sense intronic to RPAP3	34.149	-0.783666	0.359987	0.00185466	0.0238429	27	40	11	10	19	14	24.0682	33.5099	11.6244	8.98473	23.5966	15.7277	Down Regulated
ENSG00000247363	ENSG00000247363.2	NUP107-DT	68674371	68687755	-1	lncRNA	NUP107 divergent transcript [Source:HGNC Symbol;Acc:HGNC:55587]	34.7122	0.70247	0.320529	0.00187578	0.0239472	28	22	40	44	29	39	24.9596	18.4304	42.2705	39.5328	36.0159	43.8128	Up Regulated
ENSG00000257337	ENSG00000257337.6	TNS2-AS1	53012884	53054450	-1	lncRNA	TNS2 antisense RNA 1 [Source:HGNC Symbol;Acc:HGNC:27464]	74.5175	-0.476679	0.198029	0.00187604	0.0239472	92	103	53	60	43	55	82.0103	86.288	56.0085	53.9084	53.4029	61.7873	Down Regulated
ENSG00000270175	ENSG00000270175.1		53500151	53501575	-1	lncRNA	novel transcript, antisense to TARBP2	26.9504	-0.667473	0.306519	0.00187692	0.0239472	47	41	16	27	19	17	41.8966	34.3476	16.9082	24.2588	23.5966	19.0979	Down Regulated
ENSG00000216863	ENSG00000216863.9	LY86-AS1	6346465	6622771	-1	lncRNA	LY86 antisense RNA 1 [Source:HGNC Symbol;Acc:HGNC:26593]	14.4161	-1.06097	0.533503	0.00188464	0.0240156	22	23	8	2	5	12	19.6112	19.2682	8.45411	1.79695	6.20963	13.4809	Down Regulated
ENSG00000273148	ENSG00000273148.1	LCDR	18794078	18796067	1	lncRNA	lysosome cell death regulator [Source:HGNC Symbol;Acc:HGNC:44308]	18.9045	-0.775958	0.372355	0.00191292	0.0243149	27	37	14	10	11	16	24.0682	30.9967	14.7947	8.98473	13.6612	17.9745	Down Regulated
ENSG00000248240	ENSG00000248240.1		43515274	43525310	1	lncRNA	novel transcript	18.7136	-0.922519	0.457533	0.0019171	0.0243529	17	25	8	6	6	9	15.1541	20.9437	8.45411	5.39084	7.45156	10.1106	Down Regulated
ENSG00000273002	ENSG00000273002.1	ARHGEF2-AS2	155978799	155982986	1	lncRNA	ARHGEF2 antisense RNA 2 [Source:HGNC Symbol;Acc:HGNC:55175]	59.6508	-0.441105	0.179474	0.00192921	0.0244607	121	147	85	95	62	59	107.861	123.149	89.8249	85.355	76.9995	66.2809	Down Regulated
ENSG00000231453	ENSG00000231453.1	LINC01305	174326027	174330643	1	lncRNA	long intergenic non-protein coding RNA 1305 [Source:HGNC Symbol;Acc:HGNC:27690]	517.801	0.345121	0.13225	0.00196247	0.0247742	352	350	381	431	341	351	313.778	293.212	402.627	387.242	423.497	394.315	Up Regulated
ENSG00000278991	ENSG00000278991.1		77063397	77064910	-1	lncRNA	TEC	67.3125	-0.570111	0.251666	0.00197932	0.0249249	59	88	49	42	24	30	52.5935	73.7218	51.7814	37.7359	29.8062	33.7021	Down Regulated
ENSG00000246089	ENSG00000246089.3	MCPH1-DT	6403551	6407142	-1	lncRNA	MCPH1 divergent transcript [Source:HGNC Symbol;Acc:HGNC:55599]	90.0822	-0.447609	0.18372	0.00202245	0.0253424	133	159	93	104	70	59	118.558	133.202	98.279	93.4412	86.9349	66.2809	Down Regulated
ENSG00000258412	ENSG00000258412.1		96210860	96214818	1	lncRNA	novel transcript, sense intronic to BDKRB2	13.7814	0.918404	0.471257	0.00202484	0.0253567	19	17	27	41	35	34	16.9369	14.2417	28.5326	36.8374	43.4674	38.1958	Up Regulated
ENSG00000203325	ENSG00000203325.3		32052291	32073474	-1	lncRNA	novel transcript	16.5979	-0.861931	0.424294	0.00204786	0.0255661	23	23	5	10	7	12	20.5026	19.2682	5.28382	8.98473	8.69349	13.4809	Down Regulated
ENSG00000279742	ENSG00000279742.1		85852557	85854943	-1	lncRNA	TEC	15.0071	-1.2251	0.630969	0.00208998	0.0259484	16	17	3	4	5	5	14.2627	14.2417	3.17029	3.59389	6.20963	5.61702	Down Regulated
ENSG00000230068	ENSG00000230068.2	CDC42-IT1	22059197	22064199	1	lncRNA	CDC42 intronic transcript 1 [Source:HGNC Symbol;Acc:HGNC:41317]	72.7489	0.5549	0.247805	0.00220144	0.0270185	40	54	60	76	37	76	35.6566	45.2384	63.4058	68.284	45.9513	85.3788	Up Regulated
ENSG00000267702	ENSG00000267702.1	AP005131.6	13486462	13490676	1	lncRNA	novel transcript	442.302	-0.328296	0.125269	0.00222871	0.0272873	485	559	275	414	274	340	432.337	468.301	290.61	371.968	340.288	381.958	Down Regulated
ENSG00000273449	ENSG00000273449.1		163529771	163530697	1	lncRNA	novel transcript	72.3025	-0.52979	0.234352	0.00224545	0.0274426	112	100	49	51	57	58	99.8386	83.7747	51.7814	45.8221	70.7898	65.1575	Down Regulated
ENSG00000259088	ENSG00000259088.1		101796555	101810321	-1	lncRNA	novel transcript, antisense to PPP2R5C	27.5466	-0.752567	0.373785	0.0022797	0.0277776	24	29	4	15	15	9	21.394	24.2947	4.22705	13.4771	18.6289	10.1106	Down Regulated
ENSG00000264577	ENSG00000264577.1		28721487	28722877	-1	lncRNA	novel transcript, antisense to RPL23A	137.591	0.348756	0.136948	0.00232779	0.0282619	193	201	218	219	203	205	172.043	168.387	230.374	196.766	252.111	230.298	Up Regulated
ENSG00000225889	ENSG00000225889.7		64143239	64257610	1	lncRNA	novel transcript, antisense to PELI1	41.9398	0.632037	0.296	0.0023719	0.0287287	28	27	37	40	37	43	24.9596	22.6192	39.1002	35.9389	45.9513	48.3064	Up Regulated
ENSG00000270084	ENSG00000270084.2	GAS5-AS1	173862473	173863941	1	lncRNA	GAS5 antisense RNA 1 [Source:HGNC Symbol;Acc:HGNC:44119]	147.176	-0.373224	0.156541	0.00241067	0.0290832	285	307	148	188	172	183	254.054	257.188	156.401	168.913	213.611	205.583	Down Regulated
ENSG00000253854	ENSG00000253854.1		93719574	93721167	1	lncRNA	novel transcript	104.285	-0.414224	0.175019	0.00241262	0.0290832	120	170	78	84	68	98	106.97	142.417	82.4275	75.4718	84.451	110.094	Down Regulated
ENSG00000258323	ENSG00000258323.1		112063909	112065755	1	lncRNA	novel transcript, antisense to NAA25	35.8539	-0.615916	0.294331	0.00243089	0.029234	41	75	31	26	17	33	36.5481	62.831	32.7597	23.3603	21.1128	37.0724	Down Regulated
ENSG00000279539	ENSG00000279539.1		42242775	42244973	1	lncRNA	TEC	36.9492	-0.649703	0.314733	0.00246645	0.0296123	47	35	18	24	18	14	41.8966	29.3212	19.0217	21.5634	22.3547	15.7277	Down Regulated
ENSG00000270049	ENSG00000270049.2	ATP6V0D1-DT	67481314	67505977	1	lncRNA	ATP6V0D1 divergent transcript [Source:HGNC Symbol;Acc:HGNC:55268]	94.1047	-0.455121	0.19535	0.00250061	0.0299307	115	148	61	74	64	88	102.513	123.987	64.4626	66.487	79.4833	98.8596	Down Regulated
ENSG00000276672	ENSG00000276672.1		33846190	33850825	1	lncRNA	novel transcript, sense intronic to RFC3	282.009	-0.473094	0.202319	0.00251629	0.0300476	155	162	71	104	72	97	138.169	135.715	75.0302	93.4412	89.4187	108.97	Down Regulated
ENSG00000272382	ENSG00000272382.1		43033716	43034635	1	lncRNA	novel transcript	75.403	-0.541184	0.247524	0.00252818	0.0301364	59	65	22	41	21	41	52.5935	54.4536	23.2488	36.8374	26.0805	46.0596	Down Regulated
ENSG00000237993	ENSG00000237993.1		116013813	116017705	-1	lncRNA	novel transcript	98.1152	-0.676471	0.332326	0.00253832	0.0302395	37	46	20	25	7	21	32.9824	38.5364	21.1353	22.4618	8.69349	23.5915	Down Regulated
ENSG00000177757	ENSG00000177757.2	FAM87B	817371	819837	1	lncRNA	family with sequence similarity 87 member B [Source:HGNC Symbol;Acc:HGNC:32236]	23.1506	-0.813301	0.416222	0.00255473	0.0303637	34	26	12	14	11	9	30.3081	21.7814	12.6812	12.5786	13.6612	10.1106	Down Regulated
ENSG00000279762	ENSG00000279762.3		32423971	32446038	-1	lncRNA	novel transcript, antisense to PSMD11	45.5342	0.594235	0.285508	0.0026256	0.0310065	55	41	57	79	56	75	49.0279	34.3476	60.2355	70.9794	69.5479	84.2554	Up Regulated
ENSG00000228393	ENSG00000228393.3	LINC01004	104950315	105013068	-1	lncRNA	long intergenic non-protein coding RNA 1004 [Source:HGNC Symbol;Acc:HGNC:48961]	169.337	0.493102	0.224448	0.0026327	0.0310723	201	220	239	293	238	277	179.175	184.304	252.566	263.253	295.579	311.183	Up Regulated
ENSG00000284642	ENSG00000284642.1		10395416	10397432	1	lncRNA	novel transcript	25.5933	-0.689818	0.344347	0.00263846	0.0311041	46	61	19	19	18	35	41.0051	51.1026	20.0785	17.071	22.3547	39.3192	Down Regulated
ENSG00000272195	ENSG00000272195.1		244969350	244971088	-1	lncRNA	novel transcript, antisense to EFCAB2	101.704	0.631979	0.321558	0.00274429	0.0321972	72	102	107	165	105	129	64.182	85.4502	113.074	148.248	130.402	144.919	Up Regulated
ENSG00000250274	ENSG00000250274.1		170308701	170312806	-1	lncRNA	novel transcript	11.0451	1.09721	0.615482	0.00275669	0.0322731	9	7	14	22	18	21	8.02274	5.86423	14.7947	19.7664	22.3547	23.5915	Up Regulated
ENSG00000216895	ENSG00000216895.9	RBM33-DT	155611231	155645205	-1	lncRNA	RBM33 divergent transcript [Source:HGNC Symbol;Acc:HGNC:56024]	125.715	-0.332051	0.131543	0.00276084	0.0323031	173	198	99	148	105	108	154.215	165.874	104.62	132.974	130.402	121.328	Down Regulated
ENSG00000237281	ENSG00000237281.1	CATIP-AS2	218326889	218357966	-1	lncRNA	CATIP antisense RNA 2 [Source:HGNC Symbol;Acc:HGNC:41079]	24.4764	-0.722739	0.370895	0.00276299	0.0323097	36	49	10	21	17	22	32.091	41.0496	10.5676	18.8679	21.1128	24.7149	Down Regulated
ENSG00000261324	ENSG00000261324.2		14762504	14767931	-1	lncRNA	novel transcript, overlapping HIST4H4	60.4575	-0.525652	0.24053	0.00277303	0.0324084	105	143	64	73	38	78	93.5987	119.798	67.6328	65.5886	47.1932	87.6256	Down Regulated
ENSG00000227354	ENSG00000227354.6	RBM26-AS1	79406293	79427317	1	lncRNA	RBM26 antisense RNA 1 [Source:HGNC Symbol;Acc:HGNC:39805]	56.7541	-0.492748	0.222469	0.00282487	0.032863	79	98	36	65	39	47	70.4219	82.0992	38.0435	58.4008	48.4352	52.8	Down Regulated
ENSG00000236778	ENSG00000236778.7	INTS6-AS1	51452364	51554678	1	lncRNA	INTS6 antisense RNA 1 [Source:HGNC Symbol;Acc:HGNC:42691]	267.244	-0.280381	0.111899	0.00289073	0.0335907	324	358	211	234	200	229	288.819	299.914	222.977	210.243	248.385	257.26	Down Regulated
ENSG00000272425	ENSG00000272425.1		81275399	81277570	-1	lncRNA	novel transcript	38.8966	-0.689165	0.350587	0.00289672	0.033641	59	56	21	35	23	20	52.5935	46.9139	22.192	31.4466	28.5643	22.4681	Down Regulated
ENSG00000180846	ENSG00000180846.8	CSNK1G2-AS1	1952531	1954586	-1	lncRNA	CSNK1G2 antisense RNA 1 [Source:HGNC Symbol;Acc:HGNC:28604]	35.8483	-0.762114	0.394377	0.00295414	0.0342491	37	50	13	27	13	17	32.9824	41.8874	13.7379	24.2588	16.1451	19.0979	Down Regulated
ENSG00000227227	ENSG00000227227.1		186641339	186695287	-1	lncRNA	novel transcript	18.3303	0.78019	0.425731	0.00296978	0.0344007	22	22	38	54	26	34	19.6112	18.4304	40.157	48.5176	32.2901	38.1958	Up Regulated
ENSG00000228606	ENSG00000228606.2	DCAF8-DT	160261731	160263328	1	lncRNA	DCAF8 divergent transcript [Source:HGNC Symbol;Acc:HGNC:55792]	75.6446	0.502536	0.234064	0.00304637	0.0351516	63	86	79	119	69	111	56.1592	72.0463	83.4843	106.918	85.693	124.698	Up Regulated
ENSG00000269696	ENSG00000269696.1	ZNF470-DT	56545566	56567441	-1	lncRNA	ZNF470 divergent transcript [Source:HGNC Symbol;Acc:HGNC:55272]	21.4069	-0.784991	0.430394	0.00315476	0.0361419	18	33	8	12	6	13	16.0455	27.6457	8.45411	10.7817	7.45156	14.6043	Down Regulated
ENSG00000275560	ENSG00000275560.1	AC008115.3	12718973	12719521	1	lncRNA	novel transcript	25.6914	-0.838126	0.468232	0.0031587	0.0361462	31	24	13	12	7	8	27.6339	20.1059	13.7379	10.7817	8.69349	8.98724	Down Regulated
ENSG00000230513	ENSG00000230513.1	THAP7-AS1	21001886	21010342	1	lncRNA	THAP7 antisense RNA 1 [Source:HGNC Symbol;Acc:HGNC:41013]	33.3996	-0.643352	0.330609	0.00317196	0.0362775	57	32	23	26	18	13	50.8107	26.8079	24.3056	23.3603	22.3547	14.6043	Down Regulated
ENSG00000273015	ENSG00000273015.2	LINC00938	45718046	45727860	-1	lncRNA	long intergenic non-protein coding RNA 938 [Source:HGNC Symbol;Acc:HGNC:48630]	681.698	0.292727	0.107049	0.00317566	0.0362994	615	675	679	762	532	634	548.221	565.479	717.542	684.637	660.705	712.239	Up Regulated
ENSG00000260855	ENSG00000260855.1		246772301	246775772	1	lncRNA	novel transcript	146.87	-0.466896	0.212763	0.00322689	0.0367815	79	78	45	53	23	49	70.4219	65.3443	47.5543	47.6191	28.5643	55.0468	Down Regulated
ENSG00000233844	ENSG00000233844.1	KCNQ5-IT1	72630495	72678558	1	lncRNA	novel transcript	16.1334	-1.39223	0.820465	0.00324602	0.0369167	7	15	3	4	2	0	6.23991	12.5662	3.17029	3.59389	2.48385	0	Down Regulated
ENSG00000228742	ENSG00000228742.10	LINC02577	106774955	106838480	1	lncRNA	long intergenic non-protein coding RNA 2577 [Source:HGNC Symbol;Acc:HGNC:53749]	16.8523	0.685925	0.364562	0.00326246	0.037076	28	27	48	57	28	39	24.9596	22.6192	50.7246	51.213	34.774	43.8128	Up Regulated
ENSG00000272918	ENSG00000272918.1		105102838	105105483	-1	lncRNA	novel transcript, antisense to MLL5	190.235	-0.318369	0.127605	0.00326692	0.037092	244	279	135	215	153	153	217.506	233.732	142.663	193.172	190.015	171.881	Down Regulated
ENSG00000285701	ENSG00000285701.1		9900614	9908034	1	lncRNA	novel transcript, antisense to CTNNBIP1	19.7281	-0.85906	0.491912	0.00330611	0.0374742	14	29	5	6	4	15	12.4798	24.2947	5.28382	5.39084	4.96771	16.8511	Down Regulated
ENSG00000248323	ENSG00000248323.6	LUCAT1	91054834	91314547	-1	lncRNA	lung cancer associated transcript 1 [Source:HGNC Symbol;Acc:HGNC:48498]	4172.16	0.514771	0.253907	0.00332571	0.0376333	8840	10886	12985	13975	9971	13832	7880.12	9119.72	13722.1	12556.2	12383.3	15538.9	Up Regulated
ENSG00000238113	ENSG00000238113.6	LINC01410	62801461	62813486	1	lncRNA	long intergenic non-protein coding RNA 1410 [Source:HGNC Symbol;Acc:HGNC:50702]	766.576	-0.314872	0.126402	0.00343415	0.0386666	639	652	388	480	361	393	569.615	546.211	410.024	431.267	448.336	441.498	Down Regulated
ENSG00000234191	ENSG00000234191.1	LINC01283	39401252	39434824	-1	lncRNA	long intergenic non-protein coding RNA 1283 [Source:HGNC Symbol;Acc:HGNC:50339]	115.675	0.571339	0.298801	0.00346834	0.0389784	206	263	359	380	278	275	183.632	220.328	379.378	341.42	345.256	308.936	Up Regulated
ENSG00000277566	ENSG00000277566.1		113249466	113250042	1	lncRNA	novel transcript, sense intronic to TPCN1	37.825	-0.667528	0.350017	0.00356162	0.0398149	40	71	19	28	21	28	35.6566	59.4801	20.0785	25.1573	26.0805	31.4553	Down Regulated
ENSG00000227290	ENSG00000227290.1	LINC01364	87353521	87371683	-1	lncRNA	long intergenic non-protein coding RNA 1364 [Source:HGNC Symbol;Acc:HGNC:50599]	17.5545	-0.867008	0.514044	0.00358968	0.0400317	16	19	5	4	8	7	14.2627	15.9172	5.28382	3.59389	9.93542	7.86383	Down Regulated
ENSG00000248473	ENSG00000248473.1	LINC01962	181178821	181191852	-1	lncRNA	long intergenic non-protein coding RNA 1962 [Source:HGNC Symbol;Acc:HGNC:52787]	19.5503	0.739215	0.418802	0.00359713	0.0400794	21	21	34	31	34	39	18.7197	17.5927	35.9299	27.8527	42.2255	43.8128	Up Regulated
ENSG00000253475	ENSG00000253475.1		51895957	51896374	-1	lncRNA	novel transcript	13.1629	-1.14162	0.69634	0.0036622	0.0405156	10	13	2	7	0	3	8.91416	10.8907	2.11353	6.28931	0	3.37021	Down Regulated
ENSG00000235848	ENSG00000235848.4	RMDN2-AS1	37949911	38067041	-1	lncRNA	RMDN2 antisense RNA 1 [Source:HGNC Symbol;Acc:HGNC:41150]	14.1851	0.993307	0.675944	0.00367251	0.0405854	11	15	36	19	29	31	9.80558	12.5662	38.0435	17.071	36.0159	34.8255	Up Regulated
ENSG00000253385	ENSG00000253385.1		102854455	102856075	1	lncRNA	novel transcript	88.264	0.529338	0.264481	0.00370033	0.0408262	50	85	86	108	63	98	44.5708	71.2085	90.8816	97.0351	78.2414	110.094	Up Regulated
ENSG00000279537	ENSG00000279537.1		40244925	40247366	1	lncRNA	TEC	48.4509	-0.586533	0.300959	0.00375818	0.0413185	83	66	34	47	16	45	73.9875	55.2913	35.9299	42.2283	19.8708	50.5532	Down Regulated
ENSG00000273402	ENSG00000273402.1		237045	237669	1	lncRNA	novel transcript, antisense to ZNF596	17.2618	-0.678487	0.384429	0.00377822	0.0415053	38	36	16	18	10	18	33.8738	30.1589	16.9082	16.1725	12.4193	20.2213	Down Regulated
ENSG00000248571	ENSG00000248571.1		152666368	152670107	1	lncRNA	novel transcript	23.2333	-0.921731	0.562664	0.00381114	0.0417991	13	24	8	9	2	5	11.5884	20.1059	8.45411	8.08626	2.48385	5.61702	Down Regulated
ENSG00000254639	ENSG00000254639.1		46238382	46239267	1	lncRNA	novel transcript	21.8253	-0.732914	0.417031	0.00382571	0.0419077	27	48	16	13	16	14	24.0682	40.2119	16.9082	11.6802	19.8708	15.7277	Down Regulated
ENSG00000241772	ENSG00000241772.2		138569090	138574458	1	lncRNA	novel transcript	27.682	-0.837494	0.502892	0.00385148	0.0421505	19	22	5	10	7	7	16.9369	18.4304	5.28382	8.98473	8.69349	7.86383	Down Regulated
ENSG00000257815	ENSG00000257815.5	PRANCR	69901918	70243405	-1	lncRNA	progenitor renewal associated non-coding RNA [Source:HGNC Symbol;Acc:HGNC:51126]	109.516	-0.444084	0.205292	0.00387578	0.0422797	110	149	54	82	65	82	98.0558	124.824	57.0652	73.6748	80.7253	92.1192	Down Regulated
ENSG00000273188	ENSG00000273188.1		50191724	50192402	-1	lncRNA	novel transcript, antisense to TRABD	23.6003	-0.768571	0.452361	0.00392525	0.0427505	22	24	9	10	10	6	19.6112	20.1059	9.51087	8.98473	12.4193	6.74043	Down Regulated
ENSG00000231999	ENSG00000231999.6	LRRC8C-DT	89581291	89633003	-1	lncRNA	LRRC8C divergent transcript [Source:HGNC Symbol;Acc:HGNC:53731]	108.102	-0.483241	0.235069	0.00394132	0.0428505	75	90	39	55	38	41	66.8562	75.3973	41.2138	49.416	47.1932	46.0596	Down Regulated
ENSG00000237232	ENSG00000237232.7	ZNF295-AS1	42009194	42055130	1	lncRNA	ZNF295 antisense RNA 1 [Source:HGNC Symbol;Acc:HGNC:23130]	20.5983	0.695279	0.407343	0.00397223	0.0431003	26	29	58	48	33	38	23.1768	24.2947	61.2923	43.1267	40.9836	42.6894	Up Regulated
ENSG00000228649	ENSG00000228649.8	SNHG26	22854126	22872952	1	lncRNA	small nucleolar RNA host gene 26 [Source:HGNC Symbol;Acc:HGNC:53131]	240.4	0.38149	0.16991	0.00401252	0.0434678	305	353	350	443	299	388	271.882	295.725	369.867	398.024	371.336	435.881	Up Regulated
ENSG00000272010	ENSG00000272010.1		65591850	65592472	-1	lncRNA	novel transcript	24.2426	-0.778998	0.469905	0.00411002	0.0443585	21	29	7	8	14	8	18.7197	24.2947	7.39734	7.18779	17.387	8.98724	Down Regulated
ENSG00000206567	ENSG00000206567.9		10004048	10011209	-1	lncRNA	novel transcript	103.507	-0.419188	0.195373	0.00413586	0.044548	122	129	45	92	68	76	108.753	108.069	47.5543	82.6596	84.451	85.3788	Down Regulated
ENSG00000285730	ENSG00000285730.1		166995735	166999511	-1	lncRNA	novel transcript	120.281	-0.59576	0.295493	0.00421185	0.0451934	46	57	29	19	19	31	41.0051	47.7516	30.6461	17.071	23.5966	34.8255	Down Regulated
ENSG00000228368	ENSG00000228368.1		116965846	116967472	-1	lncRNA	novel transcript, antisense to ST7	15.8864	-0.845137	0.527814	0.00424047	0.0454525	14	25	10	8	3	6	12.4798	20.9437	10.5676	7.18779	3.72578	6.74043	Down Regulated
ENSG00000261526	ENSG00000261526.2		1874516	1876204	-1	lncRNA	novel transcript	23.4778	-0.58214	0.31873	0.00425094	0.0454927	47	45	16	35	17	18	41.8966	37.6986	16.9082	31.4466	21.1128	20.2213	Down Regulated
ENSG00000278330	ENSG00000278330.1		77112602	77115726	1	lncRNA	novel transcript, antisense to MBP	470.775	-0.388968	0.172775	0.00426792	0.0456023	788	988	568	636	398	470	702.436	827.694	600.242	571.429	494.287	528	Down Regulated
ENSG00000266397	ENSG00000266397.1		2967018	2985410	1	lncRNA	novel transcript, antisense to LPIN2	27.0567	-0.849893	0.538317	0.00438139	0.0466919	14	33	8	9	6	9	12.4798	27.6457	8.45411	8.08626	7.45156	10.1106	Down Regulated
ENSG00000276728	ENSG00000276728.1		45146726	45148470	-1	lncRNA	novel transcript	73.8842	-0.418563	0.195033	0.00439727	0.046812	87	90	62	53	41	43	77.5532	75.3973	65.5193	47.6191	50.919	48.3064	Down Regulated
ENSG00000234572	ENSG00000234572.1	LINC01800	64846130	64863626	-1	lncRNA	long intergenic non-protein coding RNA 1800 [Source:HGNC Symbol;Acc:HGNC:52590]	71.5537	-0.54322	0.267841	0.00440348	0.0468394	71	83	34	45	30	45	63.2905	69.533	35.9299	40.4313	37.2578	50.5532	Down Regulated
ENSG00000279453	ENSG00000279453.1		122436789	122439223	-1	lncRNA	TEC	269.173	-0.304567	0.12633	0.00444195	0.0471395	279	329	184	235	157	194	248.705	275.619	194.444	211.141	194.983	217.941	Down Regulated
ENSG00000254907	ENSG00000254907.1		43328748	43359296	-1	lncRNA	novel transcript, antisense to API5 and TTC17	15.7514	-0.721182	0.436009	0.00452262	0.0477958	20	32	13	9	7	12	17.8283	26.8079	13.7379	8.08626	8.69349	13.4809	Down Regulated
ENSG00000280214	ENSG00000280214.1		67550815	67552935	-1	lncRNA	TEC	32.3933	-0.678935	0.407268	0.0047335	0.049714	19	32	12	7	7	16	16.9369	26.8079	12.6812	6.28931	8.69349	17.9745	Down Regulated

## Sheet: Dh5a
ENSEMBL ID	ENSEMBL ID with Version	Gene name	Gene start(bp)	Gene end(bp)	Strand	Type	Gene Description	baseMean	log2FoldChange	lfcSE	pvalue	padj	Raw Mock1	Raw Mock2	Raw Mock3	Raw Mock4	Raw Dh5a_A	Raw Dh5a_B	Raw Dh5a_C	Raw Dh5a_D	Norm Mock1	Norm Mock2	Norm Mock3	Norm Mock4	Norm Dh5a_A	Norm Dh5a_B	Norm Dh5a_C	Norm Dh5a_D	Up/Down Regulation
ENSG00000276216	ENSG00000276216.1		145281116	145281462	1	lncRNA	novel transcript	328.388	3.14693	0.193508	1.74e-60	8.84e-57	74	87	60	22	484	531	437	423	66.9399	67.2864	56.8618	22.0984	482.838	544.1	457.821	453.632	Up Regulated
ENSG00000237499	ENSG00000237499.6	WAKMAR2	137823673	137868233	-1	lncRNA	wound and keratinocyte migration associated lncRNA 2 [Source:HGNC Symbol;Acc:HGNC:53754]	347.462	3.22109	0.205743	1.28e-56	4.35e-53	95	69	47	104	671	599	722	640	85.9363	53.3651	44.5418	104.465	669.388	613.777	756.4	686.346	Up Regulated
ENSG00000284669	ENSG00000284669.1		39148281	39172952	1	lncRNA	novel transcript, antisense CSRNP1	545.013	2.95323	0.18959	4.46e-56	1.29e-52	145	101	137	149	960	932	907	907	131.166	78.1141	129.834	149.666	957.694	954.992	950.214	972.681	Up Regulated
ENSG00000203395	ENSG00000203395.2		68361214	68365584	-1	lncRNA	novel transcript, antisense to PLEK	112.285	2.69945	0.185758	6.85e-49	1.55e-45	70	87	48	30	308	339	332	350	63.3215	67.2864	45.4895	30.1341	307.26	347.363	347.818	375.345	Up Regulated
ENSG00000279602	ENSG00000279602.1		43360033	43361361	-1	lncRNA	TEC	635.462	2.3304	0.163952	4.38e-47	8.09e-44	215	216	168	133	825	865	780	766	194.487	167.056	159.213	133.595	823.019	886.339	817.163	821.47	Up Regulated
ENSG00000271614	ENSG00000271614.1	ATP2B1-AS1	89708959	89712590	1	lncRNA	ATP2B1 antisense RNA 1 [Source:HGNC Symbol;Acc:HGNC:27883]	727.437	2.81913	0.203045	4.32e-45	7.32e-42	80	148	141	93	704	743	750	684	72.3674	114.464	133.625	93.4158	702.309	761.33	785.734	733.532	Up Regulated
ENSG00000255874	ENSG00000255874.2	PRECSIT	110863987	110870330	-1	lncRNA	p53 regulated carcinoma associated Stat3 activating long intergenic non-protein coding transcript [Source:HGNC Symbol;Acc:HGNC:27492]	238.629	3.95315	0.307163	7.17e-39	8.1e-36	17	17	16	3	192	160	203	177	15.3781	13.1479	15.1632	3.01341	191.539	163.947	212.672	189.818	Up Regulated
ENSG00000285646	ENSG00000285646.1		11907940	11914298	1	lncRNA	novel transcript	145.483	2.73406	0.218218	5.22e-37	5.58e-34	29	39	21	14	150	152	148	154	26.2332	30.1629	19.9016	14.0626	149.64	155.75	155.052	165.152	Up Regulated
ENSG00000224467	ENSG00000224467.1	TANK-AS1	161096231	161160224	-1	lncRNA	TANK antisense RNA 1 [Source:HGNC Symbol;Acc:HGNC:40575]	59.7362	2.90128	0.233453	1.48e-36	1.51e-33	18	29	36	11	153	126	169	175	16.2827	22.4288	34.1171	11.0492	152.633	129.108	177.052	187.673	Up Regulated
ENSG00000260805	ENSG00000260805.2		212557802	212559731	-1	lncRNA	novel transcript	187.195	2.42599	0.198197	1.2e-35	1.01e-32	68	43	48	21	205	230	211	212	61.5123	33.2565	45.4895	21.0939	204.508	235.674	221.053	227.352	Up Regulated
ENSG00000286113	ENSG00000286113.1		73879046	73882733	1	lncRNA	long intergenic non-protein coding RNA 1617	95.6498	2.58352	0.21093	1.51e-35	1.22e-32	40	43	20	20	159	189	160	143	36.1837	33.2565	18.9539	20.0894	158.618	193.663	167.623	153.355	Up Regulated
ENSG00000279491	ENSG00000279491.1		61967729	61969490	1	lncRNA	TEC	80.3274	2.25272	0.185106	2.98e-35	2.33e-32	45	37	32	33	155	174	157	137	40.7067	28.6161	30.3263	33.1476	154.628	178.293	164.48	146.921	Up Regulated
ENSG00000227741	ENSG00000227741.1		160202199	160208869	-1	lncRNA	novel transcript	129.422	1.55745	0.150223	2.14e-26	1.03e-23	63	94	67	89	199	211	198	209	56.9894	72.7003	63.4957	89.3979	198.522	216.205	207.434	224.135	Up Regulated
ENSG00000274021	ENSG00000274021.1		89351015	89353271	1	lncRNA	novel transcript, antisense to DUSP6	160.571	1.57684	0.157185	1.82e-25	7.72e-23	73	75	78	46	214	210	171	137	66.0353	58.0055	73.9204	46.2057	213.486	215.181	179.147	146.921	Up Regulated
ENSG00000270022	ENSG00000270022.3		42615244	42615907	1	lncRNA	RNA, U12 small nuclear	112.251	2.53317	0.252515	8.52e-25	3.53e-22	29	47	26	14	201	165	112	119	26.2332	36.3501	24.6401	14.0626	200.517	169.071	117.336	127.617	Up Regulated
ENSG00000230923	ENSG00000230923.2	LINC00309	64185078	64205485	-1	lncRNA	long intergenic non-protein coding RNA 309 [Source:HGNC Symbol;Acc:HGNC:25279]	54.4484	4.11009	0.408705	1.56e-24	6.11e-22	4	4	4	6	75	68	68	76	3.61837	3.09363	3.79079	6.02683	74.8199	69.6775	71.2399	81.5036	Up Regulated
ENSG00000260583	ENSG00000260583.1		25582770	25583326	-1	lncRNA	novel transcript, antisense to MRPL39	130.977	2.62455	0.264398	1.91e-24	7.3e-22	39	61	40	33	230	222	271	228	35.2791	47.1778	37.9079	33.1476	229.448	227.477	283.912	244.511	Up Regulated
ENSG00000253320	ENSG00000253320.6	MAILR	102864271	103002424	1	lncRNA	macrophage interferon regulatory lncRNA [Source:HGNC Symbol;Acc:HGNC:51558]	703.197	2.73966	0.279706	6.08e-24	2.24e-21	191	184	146	165	858	889	1138	1248	172.777	142.307	138.364	165.738	855.939	910.931	1192.22	1338.37	Up Regulated
ENSG00000275894	ENSG00000275894.1		45345115	45345823	-1	lncRNA	novel transcript, sense intronic to SDC4	61.2729	3.77507	0.387362	1.21e-23	4.31e-21	5	9	12	11	94	98	151	124	4.52296	6.96066	11.3724	11.0492	93.7742	100.418	158.194	132.98	Up Regulated
ENSG00000262202	ENSG00000262202.4		19112000	19112636	-1	lncRNA	novel transcript	44.5735	2.79495	0.288476	3.4e-23	1.15e-20	19	6	7	8	66	58	69	59	17.1873	4.64044	6.63388	8.03577	65.8415	59.4308	72.2875	63.2725	Up Regulated
ENSG00000241163	ENSG00000241163.7	LINC00877	71943592	72279503	-1	lncRNA	long intergenic non-protein coding RNA 877 [Source:HGNC Symbol;Acc:HGNC:27706]	152.993	2.3524	0.248509	1.5e-22	4.82e-20	46	30	36	34	173	182	143	179	41.6113	23.2022	34.1171	34.152	172.584	186.49	149.813	191.962	Up Regulated
ENSG00000233791	ENSG00000233791.5	BTG2-DT	203298758	203305315	-1	lncRNA	BTG2 divergent transcript [Source:HGNC Symbol;Acc:HGNC:49452]	44.5706	1.91069	0.217177	8.84e-20	2.53e-17	33	25	28	24	91	102	110	70	29.8516	19.3352	26.5355	24.1073	90.7814	104.516	115.241	75.0691	Up Regulated
ENSG00000285616	ENSG00000285616.1		40474908	40490430	-1	lncRNA	novel transcript	101.157	2.26141	0.259573	1.62e-19	4.49e-17	51	34	37	32	163	145	179	183	46.1342	26.2958	35.0648	32.1431	162.609	148.577	187.529	196.252	Up Regulated
ENSG00000270069	ENSG00000270069.1	MIR222HG	45745210	45770274	-1	lncRNA	miR222/221 cluster host gene [Source:HGNC Symbol;Acc:HGNC:49555]	1547.16	1.00479	0.115123	1.89e-19	5.12e-17	943	1020	1193	1218	1881	1942	2030	2007	853.031	788.875	1130.6	1223.45	1876.48	1989.91	2126.72	2152.34	Up Regulated
ENSG00000251139	ENSG00000251139.2		184813619	184821300	1	lncRNA	novel transcript, antisense to ACSL1	61.5638	2.517	0.291437	3.11e-19	8.1e-17	23	31	35	26	112	127	192	167	20.8056	23.9756	33.1694	26.1163	111.731	130.133	201.148	179.093	Up Regulated
ENSG00000232162	ENSG00000232162.1	USP12-AS1	27162855	27169135	1	lncRNA	USP12 antisense RNA 1 [Source:HGNC Symbol;Acc:HGNC:39961]	59.3748	2.28637	0.272473	3.33e-18	7.86e-16	17	13	22	23	68	76	86	103	15.3781	10.0543	20.8493	23.1028	67.8367	77.8749	90.0975	110.459	Up Regulated
ENSG00000273338	ENSG00000273338.1		78004346	78004554	-1	lncRNA	novel transcript, antisense to DNAJB4	68.6715	2.18919	0.265104	1.04e-17	2.4e-15	19	20	10	18	64	68	88	57	17.1873	15.4681	9.47697	18.0805	63.8463	69.6775	92.1928	61.1277	Up Regulated
ENSG00000263884	ENSG00000263884.1	THOC1-DT	268113	270298	1	lncRNA	THOC1 divergent transcript [Source:HGNC Symbol;Acc:HGNC:55334]	62.2317	1.50144	0.1893	1.4e-16	2.89e-14	35	48	33	45	101	94	129	85	31.6608	37.1235	31.274	45.2012	100.757	96.319	135.146	91.1553	Up Regulated
ENSG00000231721	ENSG00000231721.7	LINC-PINT	130791264	131110176	-1	lncRNA	long intergenic non-protein coding RNA, p53 induced transcript [Source:HGNC Symbol;Acc:HGNC:26885]	658.729	1.06751	0.135043	1.81e-16	3.72e-14	294	333	415	362	624	570	685	758	265.95	257.545	393.294	363.619	622.501	584.062	717.637	812.891	Up Regulated
ENSG00000255491	ENSG00000255491.2		124811042	124857516	-1	lncRNA	novel transcript	209.973	1.31686	0.16719	2.25e-16	4.47e-14	63	62	59	43	149	134	116	107	56.9894	47.9512	55.9141	43.1923	148.642	137.306	121.527	114.748	Up Regulated
ENSG00000260475	ENSG00000260475.1	SLC25A28-DT	99620857	99621931	1	lncRNA	SLC25A28 divergent transcript [Source:HGNC Symbol;Acc:HGNC:55979]	14.8731	2.14174	0.272865	3.92e-16	7.36e-14	13	19	8	9	55	51	45	45	11.7597	14.6947	7.58158	9.04024	54.8679	52.2582	47.144	48.2587	Up Regulated
ENSG00000273319	ENSG00000273319.1		130936464	130939661	1	lncRNA	novel transcript	259.414	1.29858	0.169773	1.2e-15	2.14e-13	136	110	130	127	268	250	288	310	123.025	85.0748	123.201	127.568	267.356	256.167	301.722	332.449	Up Regulated
ENSG00000273797	ENSG00000273797.1		69617122	69617648	1	lncRNA	novel transcript, sense intronic to KIAA0247	45.1026	1.77311	0.238001	5.18e-15	8.42e-13	11	33	38	41	91	95	107	91	9.95052	25.5224	36.0125	41.1833	90.7814	97.3436	112.098	97.5898	Up Regulated
ENSG00000284095	ENSG00000284095.1		130868004	130869357	-1	lncRNA	TEC	20.8235	2.24187	0.301097	5.93e-15	9.56e-13	12	9	28	7	60	78	51	56	10.8551	6.96066	26.5355	7.0313	59.8559	79.9242	53.4299	60.0553	Up Regulated
ENSG00000228140	ENSG00000228140.1	EFHD2-AS1	15402979	15409433	-1	lncRNA	EFHD2 antisense RNA 1 [Source:HGNC Symbol;Acc:HGNC:55801]	45.1263	1.80569	0.243287	7.95e-15	1.26e-12	20	20	18	17	57	59	64	58	18.0919	15.4681	17.0585	17.076	56.8631	60.4555	67.0493	62.2001	Up Regulated
ENSG00000222043	ENSG00000222043.2		177264359	177265515	1	lncRNA	novel transcript	26.5755	2.09717	0.286589	1.97e-14	3.04e-12	13	14	14	8	57	54	35	46	11.7597	10.8277	13.2678	8.03577	56.8631	55.3322	36.6676	49.3311	Up Regulated
ENSG00000233559	ENSG00000233559.1	LINC00513	130853720	130930682	1	lncRNA	long intergenic non-protein coding RNA 513 [Source:HGNC Symbol;Acc:HGNC:43566]	161.674	1.17157	0.161917	2.89e-14	4.32e-12	102	68	94	83	175	165	168	197	92.2685	52.5917	89.0835	83.3711	174.58	169.071	176.004	211.266	Up Regulated
ENSG00000203804	ENSG00000203804.4	ADAMTSL4-AS1	150560202	150562115	-1	lncRNA	ADAMTSL4 antisense RNA 1 [Source:HGNC Symbol;Acc:HGNC:32041]	484.415	1.06855	0.149015	5.07e-14	7.47e-12	231	415	356	437	668	583	615	840	208.961	320.964	337.38	438.954	666.396	597.382	644.302	900.829	Up Regulated
ENSG00000278743	ENSG00000278743.1		25385508	25386241	-1	lncRNA	novel transcript	40.4974	1.75746	0.245784	5.15e-14	7.5e-12	19	30	21	33	96	61	93	68	17.1873	23.2022	19.9016	33.1476	95.7694	62.5049	97.431	72.9242	Up Regulated
ENSG00000264247	ENSG00000264247.1	ZNF407-AS1	74590317	74598885	-1	lncRNA	ZNF407 antisense RNA 1 [Source:HGNC Symbol;Acc:HGNC:44331]	368.261	-0.594769	0.0822164	6.39e-14	9.07e-12	353	378	321	279	217	180	174	186	319.321	292.348	304.211	280.247	216.479	184.441	182.29	199.469	Down Regulated
ENSG00000253522	ENSG00000253522.6	MIR3142HG	160438594	160487426	1	lncRNA	MIR3142 host gene [Source:HGNC Symbol;Acc:HGNC:51944]	169.655	2.3176	0.331777	1.39e-13	1.9e-11	15	10	22	17	51	74	99	75	13.5689	7.73407	20.8493	17.076	50.8775	75.8256	103.717	80.4312	Up Regulated
ENSG00000255097	ENSG00000255097.1		9242448	9245509	-1	lncRNA	novel transcript	25.8013	2.68815	0.382523	1.44e-13	1.94e-11	7	5	9	8	30	24	54	67	6.33215	3.86703	8.52927	8.03577	29.9279	24.5921	56.5728	71.8518	Up Regulated
ENSG00000263050	ENSG00000263050.1	DPH1-AS1	2043475	2044968	-1	lncRNA	DPH1 antisense RNA 1 [Source:HGNC Symbol;Acc:HGNC:56040]	57.2967	1.85839	0.266567	1.63e-13	2.17e-11	20	19	37	29	92	91	86	84	18.0919	14.6947	35.0648	29.1297	91.779	93.2449	90.0975	90.0829	Up Regulated
ENSG00000253535	ENSG00000253535.5	ADAM7-AS1	24295814	24912073	-1	lncRNA	ADAM7, ADAMDEC1 and ADAM28 antisense RNA 1 [Source:HGNC Symbol;Acc:HGNC:56152]	205.872	2.45399	0.352053	1.7e-13	2.25e-11	7	16	21	13	57	84	73	77	6.33215	12.3745	19.9016	13.0581	56.8631	86.0723	76.4781	82.576	Up Regulated
ENSG00000274213	ENSG00000274213.1		56914168	56914533	1	lncRNA	novel transcript	43.5801	1.5566	0.223324	2.09e-13	2.7e-11	32	26	23	21	66	64	88	54	28.947	20.1086	21.797	21.0939	65.8415	65.5789	92.1928	57.9104	Up Regulated
ENSG00000230943	ENSG00000230943.2	LINC02541	113616927	113650090	-1	lncRNA	long intergenic non-protein coding RNA 2541 [Source:HGNC Symbol;Acc:HGNC:53574]	282.679	1.84562	0.267662	2.89e-13	3.72e-11	75	47	59	25	180	155	177	165	67.8445	36.3501	55.9141	25.1118	179.568	158.824	185.433	176.949	Up Regulated
ENSG00000224977	ENSG00000224977.1	RC3H1-DT	174022509	174023167	1	lncRNA	RC3H1 divergent transcript [Source:HGNC Symbol;Acc:HGNC:54295]	78.0187	1.62894	0.237656	3.8e-13	4.74e-11	35	24	29	47	112	99	85	90	31.6608	18.5618	27.4832	47.2102	111.731	101.442	89.0499	96.5174	Up Regulated
ENSG00000272247	ENSG00000272247.1		158801257	158801935	-1	lncRNA	novel transcript, antisense to MFSD1	19.3349	1.90405	0.275307	4.06e-13	5.03e-11	13	17	14	4	47	48	39	30	11.7597	13.1479	13.2678	4.01789	46.8871	49.1841	40.8582	32.1725	Up Regulated
ENSG00000260898	ENSG00000260898.5	ADPGK-AS1	72782835	72798199	1	lncRNA	ADPGK antisense RNA 1 [Source:HGNC Symbol;Acc:HGNC:44144]	226.106	0.642355	0.0929692	5.86e-13	7.13e-11	237	244	217	156	314	272	297	291	214.389	188.711	205.65	156.698	313.246	278.71	311.151	312.073	Up Regulated
ENSG00000228060	ENSG00000228060.2	PABPC4-AS1	39565052	39573860	1	lncRNA	PABPC4 antisense RNA 1 [Source:HGNC Symbol;Acc:HGNC:40424]	771.3	1.10961	0.162707	5.98e-13	7.23e-11	285	391	400	435	653	687	723	880	257.809	302.402	379.079	436.945	651.432	703.948	757.448	943.726	Up Regulated
ENSG00000228804	ENSG00000228804.5		187702313	187733849	1	lncRNA	novel transcript, antisense to RTP2 and BCL6	37.0484	1.82292	0.270007	9.61e-13	1.13e-10	7	17	22	16	47	42	46	66	6.33215	13.1479	20.8493	16.0715	46.8871	43.0361	48.1917	70.7794	Up Regulated
ENSG00000255363	ENSG00000255363.2	LINC02757	76607853	76630465	-1	lncRNA	long intergenic non-protein coding RNA 2757 [Source:HGNC Symbol;Acc:HGNC:54277]	21.8986	2.78424	0.413084	1.3e-12	1.49e-10	13	3	1	6	35	37	41	37	11.7597	2.32022	0.947697	6.02683	34.9159	37.9128	42.9535	39.6794	Up Regulated
ENSG00000253385	ENSG00000253385.1		102854455	102856075	1	lncRNA	novel transcript	88.264	1.19297	0.182916	4.3e-12	4.62e-10	77	97	105	103	159	168	209	253	69.6537	75.0205	99.5082	103.461	158.618	172.145	218.958	271.321	Up Regulated
ENSG00000260651	ENSG00000260651.1		102500841	102501319	-1	lncRNA	novel transcript, antisense NFKB1	16.5605	3.36279	0.501945	5.24e-12	5.49e-10	4	4	1	1	29	22	31	17	3.61837	3.09363	0.947697	1.00447	28.9303	22.5427	32.477	18.2311	Up Regulated
ENSG00000228261	ENSG00000228261.1	ITPRIP-AS1	104323369	104327004	1	lncRNA	ITPRIP antisense RNA 1 [Source:HGNC Symbol;Acc:HGNC:54100]	30.8225	1.32307	0.204816	6.63e-12	6.8e-10	25	60	47	49	90	89	90	139	22.6148	46.4044	44.5418	49.2191	89.7838	91.1956	94.2881	149.066	Up Regulated
ENSG00000277895	ENSG00000277895.1		64451591	64452901	-1	lncRNA	novel transcript, antisense to TBK1	50.8979	1.58566	0.245378	6.72e-12	6.82e-10	28	24	22	15	70	58	74	42	25.3286	18.5618	20.8493	15.0671	69.8319	59.4308	77.5258	45.0414	Up Regulated
ENSG00000269902	ENSG00000269902.1		45764772	45765299	-1	lncRNA	novel transcript	260.57	0.966932	0.15042	8.26e-12	8.23e-10	180	209	215	262	354	362	414	402	162.827	161.642	203.755	263.171	353.15	370.93	433.725	431.111	Up Regulated
ENSG00000233922	ENSG00000233922.2	LINC01694	45590771	45603088	1	lncRNA	long intergenic non-protein coding RNA 1694 [Source:HGNC Symbol;Acc:HGNC:52481]	109.724	1.82283	0.286852	1.54e-11	1.47e-09	1	6	31	5	39	23	47	32	0.904593	4.64044	29.3786	5.02236	38.9063	23.5674	49.2393	34.3173	Up Regulated
ENSG00000223725	ENSG00000223725.6		207239864	207529795	-1	lncRNA	novel transcript	33.4183	1.37016	0.216659	1.61e-11	1.53e-09	33	31	28	32	81	74	59	78	29.8516	23.9756	26.5355	32.1431	80.8055	75.8256	61.8111	83.6484	Up Regulated
ENSG00000250295	ENSG00000250295.6	RDH10-AS1	73297711	73356461	-1	lncRNA	RDH10 antisense RNA 1 [Source:HGNC Symbol;Acc:HGNC:51658]	324.717	1.31825	0.209389	1.74e-11	1.64e-09	98	120	123	182	314	287	278	324	88.6501	92.8088	116.567	182.814	313.246	294.08	291.245	347.463	Up Regulated
ENSG00000234206	ENSG00000234206.5		107509803	107511721	-1	lncRNA	novel transcript	38.2755	-1.38802	0.221178	2.34e-11	2.15e-09	113	109	50	73	32	32	22	23	102.219	84.3014	47.3848	73.3264	31.9231	32.7894	23.0482	24.6656	Down Regulated
ENSG00000233339	ENSG00000233339.1		106179542	106183797	1	lncRNA	novel transcript	37.1615	1.67768	0.270211	2.92e-11	2.66e-09	17	42	24	50	82	67	108	134	15.3781	32.4831	22.7447	50.2236	81.8031	68.6529	113.146	143.704	Up Regulated
ENSG00000258820	ENSG00000258820.5		75259411	75271950	1	lncRNA	novel transcript, antisense to a novel orphan protein	19.208	2.31586	0.370443	3.16e-11	2.86e-09	9	7	6	7	38	38	28	32	8.14134	5.41385	5.68618	7.0313	37.9087	38.9374	29.3341	34.3173	Up Regulated
ENSG00000172965	ENSG00000172965.15	MIR4435-2HG	111006015	111523376	-1	lncRNA	MIR4435-2 host gene [Source:HGNC Symbol;Acc:HGNC:35163]	1231.61	0.417949	0.0640842	4.64e-11	4.11e-09	1033	1080	1198	939	1344	1174	1198	1255	934.445	835.28	1135.34	943.199	1340.77	1202.96	1255.08	1345.88	Up Regulated
ENSG00000203709	ENSG00000203709.11	MIR29B2CHG	207801518	207879115	-1	lncRNA	MIR29B2 and MIR29C host gene [Source:HGNC Symbol;Acc:HGNC:32018]	378.757	0.504892	0.080762	6.71e-11	5.65e-09	587	541	517	533	733	691	659	655	530.996	418.413	489.959	535.383	731.239	708.047	690.398	702.432	Up Regulated
ENSG00000231856	ENSG00000231856.2		51803838	51813832	1	lncRNA	novel transcript	70.4866	1.18241	0.193817	7.3e-11	6.13e-09	32	46	36	36	83	84	79	62	28.947	35.5767	34.1171	36.161	82.8007	86.0723	82.764	66.4898	Up Regulated
ENSG00000237513	ENSG00000237513.1	AC007384.1	104941063	104962334	1	lncRNA	novel transcript	127.257	1.17183	0.194574	1.06e-10	8.69e-09	85	114	104	136	245	242	210	208	76.8904	88.1684	98.5605	136.608	244.412	247.97	220.006	223.062	Up Regulated
ENSG00000230322	ENSG00000230322.1		11168922	11171376	-1	lncRNA	novel transcript	155.373	-1.03301	0.171205	1.07e-10	8.7e-09	470	571	538	538	183	232	210	247	425.159	441.615	509.861	540.406	182.56	237.723	220.006	264.887	Down Regulated
ENSG00000261592	ENSG00000261592.1		87396704	87400295	-1	lncRNA	novel transcript, antisense to MAP1LC3B	34.6772	1.32959	0.216718	1.29e-10	1.04e-08	23	35	17	15	58	51	43	49	20.8056	27.0692	16.1108	15.0671	57.8607	52.2582	45.0488	52.5484	Up Regulated
ENSG00000260368	ENSG00000260368.1		100913247	100914388	-1	lncRNA	novel transcript, overlapping YWHAZ	168.549	1.21337	0.204038	1.62e-10	1.26e-08	57	81	135	97	182	200	203	204	51.5618	62.646	127.939	97.4337	181.563	204.934	212.672	218.773	Up Regulated
ENSG00000225945	ENSG00000225945.1	ZFAND3-DT	37815777	37819218	-1	lncRNA	ZFAND3 divergent transcript [Source:HGNC Symbol;Acc:HGNC:55841]	26.6867	1.64762	0.276987	1.83e-10	1.41e-08	13	12	9	19	43	38	38	35	11.7597	9.28088	8.52927	19.085	42.8967	38.9374	39.8105	37.5345	Up Regulated
ENSG00000281491	ENSG00000281491.1	DNAJB5-DT	34985410	34989379	-1	lncRNA	DNAJB5 divergent transcript [Source:HGNC Symbol;Acc:HGNC:49846]	25.0658	1.89801	0.318633	1.88e-10	1.44e-08	9	6	9	12	43	30	26	27	8.14134	4.64044	8.52927	12.0537	42.8967	30.7401	27.2388	28.9552	Up Regulated
ENSG00000232160	ENSG00000232160.6	RAP2C-AS1	132217053	132432862	1	lncRNA	RAP2C antisense RNA 1 [Source:HGNC Symbol;Acc:HGNC:40957]	93.7212	0.876843	0.148035	2.59e-10	1.92e-08	78	57	63	49	103	108	97	99	70.5583	44.0842	59.7049	49.2191	102.753	110.664	101.622	106.169	Up Regulated
ENSG00000286207	ENSG00000286207.1		152635268	152641275	-1	lncRNA	novel transcript, antisense to FMNL2	537.542	0.587883	0.0985652	3.14e-10	2.29e-08	371	405	557	380	605	556	552	584	335.604	313.23	527.867	381.699	603.547	569.716	578.3	626.291	Up Regulated
ENSG00000281398	ENSG00000281398.4	SNHG4	139274102	139284899	1	lncRNA	small nucleolar RNA host gene 4 [Source:HGNC Symbol;Acc:HGNC:32964]	546.455	-0.579069	0.0977506	4.11e-10	2.86e-08	574	592	486	700	356	356	323	324	519.236	457.857	460.581	703.13	355.145	364.782	338.389	347.463	Down Regulated
ENSG00000234883	ENSG00000234883.5	MIR155HG	25561810	25575168	1	lncRNA	MIR155 host gene [Source:HGNC Symbol;Acc:HGNC:35460]	1232.82	1.10501	0.190267	4.12e-10	2.86e-08	693	853	616	656	1244	1268	1567	1383	626.883	659.716	583.781	658.933	1241.01	1299.28	1641.66	1483.15	Up Regulated
ENSG00000225889	ENSG00000225889.7		64143239	64257610	1	lncRNA	novel transcript, antisense to PELI1	41.9398	1.17507	0.202691	4.72e-10	3.23e-08	38	32	36	18	69	63	52	70	34.3745	24.749	34.1171	18.0805	68.8343	64.5542	54.4776	75.0691	Up Regulated
ENSG00000234292	ENSG00000234292.3		91280097	91281142	-1	lncRNA	novel transcript	64.222	2.12786	0.363847	5.39e-10	3.61e-08	4	4	8	5	28	27	19	13	3.61837	3.09363	7.58158	5.02236	27.9328	27.6661	19.9053	13.9414	Up Regulated
ENSG00000273329	ENSG00000273329.1		129604548	129611671	-1	lncRNA	novel transcript	421.636	-0.49298	0.0835378	6.1e-10	4.02e-08	616	816	655	841	446	452	432	464	557.229	631.1	620.742	844.76	444.929	463.151	452.583	497.601	Down Regulated
ENSG00000258162	ENSG00000258162.3		81378042	81556637	1	lncRNA	novel transcript, antisense to PPFIA2	35.5777	-2.80879	0.489096	6.31e-10	4.15e-08	91	24	10	52	7	3	4	6	82.318	18.5618	9.47697	52.2325	6.98319	3.07401	4.19058	6.43449	Down Regulated
ENSG00000228956	ENSG00000228956.8	SATB1-AS1	18445024	18923280	1	lncRNA	SATB1 antisense RNA 1 [Source:HGNC Symbol;Acc:HGNC:50687]	604.716	-0.583005	0.100217	7.71e-10	4.94e-08	1230	1534	1005	1592	767	724	841	739	1112.65	1186.41	952.435	1599.12	765.158	741.861	881.07	792.515	Down Regulated
ENSG00000261296	ENSG00000261296.1		62274163	62278365	1	lncRNA	novel transcript	63.5653	1.65586	0.298939	1.94e-09	1.15e-07	10	6	19	11	28	41	33	34	9.04593	4.64044	18.0062	11.0492	27.9328	42.0115	34.5723	36.4621	Up Regulated
ENSG00000267123	ENSG00000267123.6	SCAT1	78605233	78632155	-1	lncRNA	S-phase cancer associated transcript 1 [Source:HGNC Symbol;Acc:HGNC:52930]	244.225	0.686429	0.122389	2.15e-09	1.25e-07	102	149	167	91	195	174	181	179	92.2685	115.238	158.265	91.4069	194.532	178.293	189.624	191.962	Up Regulated
ENSG00000271204	ENSG00000271204.1		130930209	130932206	-1	lncRNA	novel transcript	191.482	1.04042	0.189232	2.53e-09	1.45e-07	98	103	133	95	177	176	206	244	88.6501	79.6609	126.044	95.4248	176.575	180.342	215.815	261.669	Up Regulated
ENSG00000231106	ENSG00000231106.2	LINC01436	36005137	36007838	1	lncRNA	long intergenic non-protein coding RNA 1436 [Source:HGNC Symbol;Acc:HGNC:50754]	208.413	-0.654821	0.117925	3.17e-09	1.78e-07	276	300	200	203	132	119	151	124	249.668	232.022	189.539	203.908	131.683	121.936	158.194	132.98	Down Regulated
ENSG00000280228	ENSG00000280228.1		112840328	112844195	1	lncRNA	TEC	51.6099	1.72763	0.32077	4.25e-09	2.29e-07	32	34	18	9	69	54	81	79	28.947	26.2958	17.0585	9.04024	68.8343	55.3322	84.8593	84.7208	Up Regulated
ENSG00000263753	ENSG00000263753.7	LINC00667	5237826	5290608	1	lncRNA	long intergenic non-protein coding RNA 667 [Source:HGNC Symbol;Acc:HGNC:27906]	490.39	-0.496338	0.0893457	4.72e-09	2.5e-07	314	393	306	325	199	207	202	204	284.042	303.949	289.995	326.453	198.522	212.107	211.624	218.773	Down Regulated
ENSG00000228692	ENSG00000228692.2		163586583	163588165	-1	lncRNA	novel transcript	116.326	0.87806	0.162396	4.99e-09	2.62e-07	83	75	125	49	156	114	154	128	75.0812	58.0055	118.462	49.2191	155.625	116.812	161.337	137.269	Up Regulated
ENSG00000238057	ENSG00000238057.9	ZEB2-AS1	144517978	144521477	1	lncRNA	ZEB2 antisense RNA 1 [Source:HGNC Symbol;Acc:HGNC:37149]	764.864	0.563442	0.102439	5.3e-09	2.75e-07	672	956	647	508	886	922	887	906	607.886	739.377	613.16	510.271	883.872	944.745	929.261	971.608	Up Regulated
ENSG00000235527	ENSG00000235527.6	HIPK1-AS1	113924000	113929495	-1	lncRNA	HIPK1 antisense RNA 1 [Source:HGNC Symbol;Acc:HGNC:50576]	227.374	1.1339	0.21319	6.57e-09	3.32e-07	137	140	140	91	258	276	253	230	123.929	108.277	132.678	91.4069	257.38	282.809	265.054	246.656	Up Regulated
ENSG00000267519	ENSG00000267519.6	MIR23AHG	13823880	13842928	-1	lncRNA	miR-23a/27a/24-2 cluster host gene [Source:HGNC Symbol;Acc:HGNC:27620]	18232.7	1.11853	0.210466	6.79e-09	3.39e-07	12382	12579	14418	14691	28932	29431	25764	24647	11200.7	9728.69	13663.9	14756.7	28862.5	30157.1	26991.5	26431.8	Up Regulated
ENSG00000283265	ENSG00000283265.1		137693068	137700415	1	lncRNA	novel transcript	26.5106	5.25767	0.974138	9.39e-09	4.5e-07	3	0	1	0	31	53	44	43	2.71378	0	0.947697	0	30.9255	54.3075	46.0964	46.1139	Up Regulated
ENSG00000250240	ENSG00000250240.5		95701249	95732295	-1	lncRNA	novel transcript	48.3962	-1.17469	0.222799	9.68e-09	4.62e-07	85	101	42	41	26	22	22	27	76.8904	78.1141	39.8033	41.1833	25.9376	22.5427	23.0482	28.9552	Down Regulated
ENSG00000257497	ENSG00000257497.2	GLIPR1-AS1	75483454	75489820	-1	lncRNA	GLIPR1 antisense RNA 1 [Source:HGNC Symbol;Acc:HGNC:56075]	156.417	0.768458	0.144889	1.02e-08	4.84e-07	152	168	200	105	238	250	238	229	137.498	129.932	189.539	105.469	237.428	256.167	249.34	245.583	Up Regulated
ENSG00000268471	ENSG00000268471.6	MIR4453HG	152536264	152539263	1	lncRNA	MIR4453 host gene [Source:HGNC Symbol;Acc:HGNC:25288]	84.1019	-0.85188	0.161618	1.13e-08	5.27e-07	109	167	143	100	59	50	65	66	98.6006	129.159	135.521	100.447	58.8583	51.2335	68.0969	70.7794	Down Regulated
ENSG00000232671	ENSG00000232671.5	ZNF687-AS1	151279678	151282000	-1	lncRNA	ZNF687 antisense RNA 1 [Source:HGNC Symbol;Acc:HGNC:54048]	20.7524	1.75572	0.337375	1.33e-08	6.06e-07	13	5	13	4	28	29	27	28	11.7597	3.86703	12.3201	4.01789	27.9328	29.7154	28.2864	30.0276	Up Regulated
ENSG00000253177	ENSG00000253177.1		92668660	92683450	1	lncRNA	novel transcript	54.6379	-1.92681	0.371894	1.47e-08	6.61e-07	28	33	26	59	12	6	4	9	25.3286	25.5224	24.6401	59.2638	11.9712	6.14802	4.19058	9.65174	Down Regulated
ENSG00000231507	ENSG00000231507.1	LINC01353	203273221	203288804	1	lncRNA	long intergenic non-protein coding RNA 1353 [Source:HGNC Symbol;Acc:HGNC:50580]	45.8718	1.16552	0.226794	1.88e-08	8.25e-07	36	47	25	21	66	60	79	58	32.5653	36.3501	23.6924	21.0939	65.8415	61.4802	82.764	62.2001	Up Regulated
ENSG00000230438	ENSG00000230438.6	SERPINB9P1	2851230	2881407	-1	lncRNA	serpin family B member 9 pseudogene 1 [Source:HGNC Symbol;Acc:HGNC:28590]	15.7093	2.64687	0.50717	2.04e-08	8.75e-07	3	4	4	1	16	11	23	24	2.71378	3.09363	3.79079	1.00447	15.9616	11.2714	24.0958	25.738	Up Regulated
ENSG00000257718	ENSG00000257718.1	CPNE8-AS1	38906451	38909592	1	lncRNA	CPNE8 antisense RNA 1 [Source:HGNC Symbol;Acc:HGNC:53937]	80.2384	1.07689	0.208663	2.22e-08	9.39e-07	30	55	46	55	88	111	82	76	27.1378	42.5374	43.5941	55.2459	87.7886	113.738	85.9069	81.5036	Up Regulated
ENSG00000260278	ENSG00000260278.1	BMP2K-DT	78773654	78775973	-1	lncRNA	BMP2K divergent transcript [Source:HGNC Symbol;Acc:HGNC:55396]	91.3366	1.02056	0.200017	2.37e-08	9.95e-07	52	40	28	32	68	77	75	61	47.0388	30.9363	26.5355	32.1431	67.8367	78.8996	78.5734	65.4173	Up Regulated
ENSG00000260135	ENSG00000260135.6	MMP2-AS1	55426797	55462297	-1	lncRNA	MMP2 antisense RNA 1 [Source:HGNC Symbol;Acc:HGNC:53142]	39.4553	2.21271	0.438644	2.64e-08	1.08e-06	5	7	4	11	21	26	40	35	4.52296	5.41385	3.79079	11.0492	20.9496	26.6414	41.9058	37.5345	Up Regulated
ENSG00000261136	ENSG00000261136.1		39782571	39785617	1	lncRNA	novel transcript, antisense to FSIP1	36.4546	-1.16025	0.229195	2.67e-08	1.09e-06	74	64	69	93	30	32	33	17	66.9399	49.498	65.3911	93.4158	29.9279	32.7894	34.5723	18.2311	Down Regulated
ENSG00000258858	ENSG00000258858.1		104690091	104691284	-1	lncRNA	novel transcript, antisense to INF2	27.9517	1.64111	0.327898	3.58e-08	1.41e-06	12	11	8	11	34	29	38	23	10.8551	8.50748	7.58158	11.0492	33.9183	29.7154	39.8105	24.6656	Up Regulated
ENSG00000269919	ENSG00000269919.1		106100140	106100593	1	lncRNA	novel transcript, sense intronic to PRDM1	36.1938	1.39983	0.280875	3.6e-08	1.42e-06	14	36	30	27	64	46	76	76	12.6643	27.8427	28.4309	27.1207	63.8463	47.1348	79.621	81.5036	Up Regulated
ENSG00000235724	ENSG00000235724.9	PSMD14-DT	161222785	161308389	-1	lncRNA	PSMD14 divergent transcript [Source:HGNC Symbol;Acc:HGNC:56104]	78.5498	1.1196	0.225414	4.21e-08	1.61e-06	36	46	43	48	62	68	87	128	32.5653	35.5767	40.751	48.2146	61.8511	69.6775	91.1451	137.269	Up Regulated
ENSG00000268257	ENSG00000268257.2	AIRN	160003291	160007664	-1	lncRNA	antisense of IGF2R non-protein coding RNA [Source:HGNC Symbol;Acc:HGNC:34515]	147.823	0.613866	0.120699	4.35e-08	1.65e-06	171	150	189	153	257	210	213	231	154.685	116.011	179.115	153.684	256.383	215.181	223.148	247.728	Up Regulated
ENSG00000236404	ENSG00000236404.9	VLDLR-AS1	2421597	2622457	-1	lncRNA	VLDLR antisense RNA 1 [Source:HGNC Symbol;Acc:HGNC:49621]	106.156	-0.887255	0.17781	4.53e-08	1.71e-06	254	287	119	216	99	98	92	103	229.767	221.968	112.776	216.966	98.7622	100.418	96.3834	110.459	Down Regulated
ENSG00000254143	ENSG00000254143.1		40161458	40172612	1	lncRNA	novel transcript	48.1383	3.05075	0.587966	4.65e-08	1.75e-06	2	3	2	0	15	17	12	15	1.80919	2.32022	1.89539	0	14.964	17.4194	12.5717	16.0862	Up Regulated
ENSG00000279957	ENSG00000279957.1		113904086	113905258	1	lncRNA	TEC	90.7994	0.868923	0.172787	4.82e-08	1.8e-06	86	105	122	103	146	175	171	195	77.795	81.2077	115.619	103.461	145.649	179.317	179.147	209.121	Up Regulated
ENSG00000253123	ENSG00000253123.3		37326575	37331991	-1	lncRNA	novel transcript	260.949	0.98475	0.198717	5.2e-08	1.92e-06	50	77	48	36	91	103	91	92	45.2296	59.5523	45.4895	36.161	90.7814	105.541	95.3357	98.6622	Up Regulated
ENSG00000239569	ENSG00000239569.3	KMT2E-AS1	105013277	105014321	-1	lncRNA	KMT2E antisense RNA 1 [Source:HGNC Symbol;Acc:HGNC:40845]	93.4574	1.03763	0.210242	5.21e-08	1.92e-06	74	70	98	58	132	138	149	147	66.9399	54.1385	92.8743	58.2593	131.683	141.404	156.099	157.645	Up Regulated
ENSG00000244040	ENSG00000244040.6	IL12A-AS1	159902045	160225299	-1	lncRNA	IL12A antisense RNA 1 [Source:HGNC Symbol;Acc:HGNC:49094]	106.454	-1.00657	0.20462	6.11e-08	2.19e-06	193	135	61	76	58	43	43	46	174.586	104.41	57.8095	76.3398	57.8607	44.0608	45.0488	49.3311	Down Regulated
ENSG00000248323	ENSG00000248323.6	LUCAT1	91054834	91314547	-1	lncRNA	lung cancer associated transcript 1 [Source:HGNC Symbol;Acc:HGNC:48498]	4172.16	0.957967	0.195329	6.35e-08	2.26e-06	315	328	978	874	1136	1181	1103	1181	284.947	253.677	926.848	877.908	1133.27	1210.13	1155.55	1266.52	Up Regulated
ENSG00000252690	ENSG00000252690.3		82752884	82757208	1	lncRNA	TEC	23.5173	-1.56566	0.322443	6.93e-08	2.43e-06	19	54	40	47	8	12	11	12	17.1873	41.764	37.9079	47.2102	7.98079	12.296	11.5241	12.869	Down Regulated
ENSG00000257467	ENSG00000257467.5	PPFIA2-AS1	81270669	81312422	1	lncRNA	PPFIA2 antisense RNA 1 [Source:HGNC Symbol;Acc:HGNC:53397]	30.3208	-2.0688	0.434391	1.02e-07	3.35e-06	97	40	22	40	14	9	9	5	87.7455	30.9363	20.8493	40.1789	13.9664	9.22203	9.42881	5.36208	Down Regulated
ENSG00000259943	ENSG00000259943.1	ZMPSTE24-DT	40256333	40257971	-1	lncRNA	ZMPSTE24 divergent transcript [Source:HGNC Symbol;Acc:HGNC:55402]	1944.94	-0.375086	0.0740035	1.08e-07	3.5e-06	1832	1846	1643	1159	1059	1118	1131	972	1657.21	1427.71	1557.07	1164.18	1056.46	1145.58	1184.89	1042.39	Down Regulated
ENSG00000249307	ENSG00000249307.6	LINC01088	78939485	79309673	1	lncRNA	long intergenic non-protein coding RNA 1088 [Source:HGNC Symbol;Acc:HGNC:49148]	65.6105	0.935298	0.194954	1.17e-07	3.75e-06	37	50	79	32	86	83	91	86	33.4699	38.6703	74.8681	32.1431	85.7934	85.0476	95.3357	92.2277	Up Regulated
ENSG00000245532	ENSG00000245532.8	NEAT1	65422774	65445540	1	lncRNA	nuclear paraspeckle assembly transcript 1 [Source:HGNC Symbol;Acc:HGNC:30815]	50730.8	0.670674	0.137891	1.2e-07	3.85e-06	42759	55480	59051	39539	67277	66210	67410	79682	38679.5	42908.6	55962.5	39715.8	67115.4	67843.4	70621.8	85452.2	Up Regulated
ENSG00000268001	ENSG00000268001.1	CARD8-AS1	48255675	48258199	1	lncRNA	CARD8 antisense RNA 1 [Source:HGNC Symbol;Acc:HGNC:51408]	450.488	-0.514529	0.105681	1.24e-07	3.96e-06	323	387	300	217	174	178	199	172	292.184	299.309	284.309	217.97	173.582	182.391	208.481	184.455	Down Regulated
ENSG00000237781	ENSG00000237781.3	ADAMTSL4-AS2	150548562	150557724	-1	lncRNA	ADAMTSL4 antisense RNA 2 [Source:HGNC Symbol;Acc:HGNC:40895]	53.1502	1.13427	0.240663	1.59e-07	4.83e-06	15	26	27	24	45	45	48	49	13.5689	20.1086	25.5878	24.1073	44.8919	46.1101	50.287	52.5484	Up Regulated
ENSG00000272195	ENSG00000272195.1		244969350	244971088	-1	lncRNA	novel transcript, antisense to EFCAB2	101.704	1.11125	0.237564	1.78e-07	5.29e-06	73	70	85	55	148	172	123	125	66.0353	54.1385	80.5542	55.2459	147.645	176.243	128.86	134.052	Up Regulated
ENSG00000246130	ENSG00000246130.1		23068229	23083619	1	lncRNA	novel transcript	10.4171	2.5513	0.534345	1.85e-07	5.47e-06	2	3	1	5	22	7	16	20	1.80919	2.32022	0.947697	5.02236	21.9472	7.17269	16.7623	21.4483	Up Regulated
ENSG00000175061	ENSG00000175061.17	SNHG29	16438767	16480249	1	lncRNA	small nucleolar RNA host gene 29 [Source:HGNC Symbol;Acc:HGNC:28619]	1461.6	-0.352517	0.071187	2.19e-07	6.28e-06	1531	2122	1568	1593	1252	1181	1135	1016	1384.93	1641.17	1485.99	1600.12	1248.99	1210.13	1189.08	1089.57	Down Regulated
ENSG00000286242	ENSG00000286242.1		102814252	102819881	1	lncRNA	novel transcript, antisense to UBE2D3	250.086	0.521618	0.108332	2.2e-07	6.29e-06	217	239	255	229	276	273	346	309	196.297	184.844	241.663	230.024	275.337	279.735	362.485	331.376	Up Regulated
ENSG00000280161	ENSG00000280161.1		180810401	180811384	1	lncRNA	TEC	22.2281	1.32813	0.288294	2.66e-07	7.26e-06	15	20	15	10	40	42	26	33	13.5689	15.4681	14.2155	10.0447	39.9039	43.0361	27.2388	35.3897	Up Regulated
ENSG00000249173	ENSG00000249173.5	LINC01093	184892858	184899553	-1	lncRNA	long intergenic non-protein coding RNA 1093 [Source:HGNC Symbol;Acc:HGNC:49218]	9.42594	4.99813	1.21699	2.74e-07	7.44e-06	0	0	1	0	12	12	13	10	0	0	0.947697	0	11.9712	12.296	13.6194	10.7242	Up Regulated
ENSG00000269971	ENSG00000269971.1		27773858	27774041	1	lncRNA	novel transcript, sense intronic to STX12	33.0031	1.123	0.246664	3.44e-07	9.07e-06	26	22	30	15	47	43	42	56	23.5194	17.015	28.4309	15.0671	46.8871	44.0608	44.0011	60.0553	Up Regulated
ENSG00000274215	ENSG00000274215.1		92808451	92809057	1	lncRNA	novel transcript	11.6167	3.22583	0.687641	3.9e-07	1.01e-05	3	0	2	1	11	20	16	13	2.71378	0	1.89539	1.00447	10.9736	20.4934	16.7623	13.9414	Up Regulated
ENSG00000224116	ENSG00000224116.6	INHBA-AS1	41693884	41779388	1	lncRNA	INHBA antisense RNA 1 [Source:HGNC Symbol;Acc:HGNC:40303]	43.7482	-1.81749	0.409376	4.05e-07	1.04e-05	129	103	38	299	58	28	27	18	116.692	79.6609	36.0125	300.337	57.8607	28.6908	28.2864	19.3035	Down Regulated
ENSG00000235862	ENSG00000235862.2		212624284	212626771	-1	lncRNA	novel transcript	19.7144	2.61567	0.574387	4.11e-07	1.06e-05	5	0	4	2	18	17	23	12	4.52296	0	3.79079	2.00894	17.9568	17.4194	24.0958	12.869	Up Regulated
ENSG00000258413	ENSG00000258413.1	FBXO34-AS1	55262222	55272075	-1	lncRNA	FBXO34 antisense RNA 1 [Source:HGNC Symbol;Acc:HGNC:55450]	26.2079	1.01065	0.224764	4.74e-07	1.19e-05	43	31	37	23	79	65	57	49	38.8975	23.9756	35.0648	23.1028	78.8103	66.6035	59.7158	52.5484	Up Regulated
ENSG00000254325	ENSG00000254325.2		55893595	55895739	1	lncRNA	novel transcript	87.02	1.07156	0.240241	5.14e-07	1.28e-05	82	153	114	70	163	145	215	277	74.1766	118.331	108.037	70.313	162.609	148.577	225.244	297.059	Up Regulated
ENSG00000177410	ENSG00000177410.12	ZFAS1	49278178	49299600	1	lncRNA	ZNFX1 antisense RNA 1 [Source:HGNC Symbol;Acc:HGNC:33101]	1013.63	0.451759	0.0962762	5.21e-07	1.29e-05	856	1041	1010	883	1227	1252	1112	1023	774.332	805.117	957.174	886.948	1224.05	1282.89	1164.98	1097.08	Up Regulated
ENSG00000226380	ENSG00000226380.9	AC016831.1	130876809	130913310	-1	lncRNA	novel transcript	306.85	0.906864	0.20311	5.61e-07	1.37e-05	144	121	116	140	247	188	208	260	130.261	93.5822	109.933	140.626	246.407	192.638	217.91	278.828	Up Regulated
ENSG00000285967	ENSG00000285967.1	NIPBL-DT	36864425	36876700	-1	lncRNA	NIPBL divergent transcript [Source:HGNC Symbol;Acc:HGNC:51293]	665.507	-0.395886	0.0838728	5.71e-07	1.38e-05	1128	1141	919	742	618	674	667	590	1020.38	882.457	870.934	745.318	616.516	690.627	698.779	632.725	Down Regulated
ENSG00000267575	ENSG00000267575.6	LINC02987	27793431	27984984	1	lncRNA	long intergenic non-protein coding RNA 2987 [Source:HGNC Symbol;Acc:HGNC:56093]	171.866	-0.556497	0.121954	6.84e-07	1.61e-05	173	347	239	258	145	149	141	148	156.495	268.372	226.5	259.154	144.652	152.676	147.718	158.717	Down Regulated
ENSG00000234456	ENSG00000234456.7	MAGI2-AS3	79452877	79471208	1	lncRNA	MAGI2 antisense RNA 3 [Source:HGNC Symbol;Acc:HGNC:40862]	143.849	-0.724557	0.162471	7.19e-07	1.68e-05	153	120	121	102	59	61	67	64	138.403	92.8088	114.671	102.456	58.8583	62.5049	70.1922	68.6346	Down Regulated
ENSG00000285552	ENSG00000285552.1		40463562	40504563	1	lncRNA	novel transcript	23.0607	1.27148	0.289997	7.22e-07	1.68e-05	10	15	21	15	28	42	32	37	9.04593	11.6011	19.9016	15.0671	27.9328	43.0361	33.5247	39.6794	Up Regulated
ENSG00000203808	ENSG00000203808.11	BVES-AS1	105136308	105199559	1	lncRNA	BVES antisense RNA 1 [Source:HGNC Symbol;Acc:HGNC:21223]	43.3461	-1.01493	0.231806	7.97e-07	1.84e-05	135	139	44	76	45	32	42	38	122.12	107.504	41.6987	76.3398	44.8919	32.7894	44.0011	40.7518	Down Regulated
ENSG00000255521	ENSG00000255521.1	CD44-DT	35132655	35138951	-1	lncRNA	CD44 divergent transcript [Source:HGNC Symbol;Acc:HGNC:56175]	17.7927	3.27053	0.74749	8.38e-07	1.91e-05	4	2	3	0	17	19	23	34	3.61837	1.54681	2.84309	0	16.9592	19.4687	24.0958	36.4621	Up Regulated
ENSG00000237892	ENSG00000237892.1	KLF7-IT1	207120884	207122044	-1	lncRNA	KLF7 intronic transcript 1 [Source:HGNC Symbol;Acc:HGNC:41355]	92.2907	0.627588	0.139116	8.77e-07	1.97e-05	113	128	135	114	165	147	181	186	102.219	98.9961	127.939	114.51	164.604	150.626	189.624	199.469	Up Regulated
ENSG00000250274	ENSG00000250274.1		170308701	170312806	-1	lncRNA	novel transcript	11.0451	3.24492	0.709958	1e-06	2.2e-05	4	1	0	0	16	10	15	10	3.61837	0.773407	0	0	15.9616	10.2467	15.7147	10.7242	Up Regulated
ENSG00000229951	ENSG00000229951.5	FOSL2-AS1	28384409	28394680	-1	lncRNA	FOSL2 antisense RNA 1 [Source:HGNC Symbol;Acc:HGNC:55784]	22.3227	1.21179	0.281722	1.13e-06	2.44e-05	14	16	14	13	29	27	35	33	12.6643	12.3745	13.2678	13.0581	28.9303	27.6661	36.6676	35.3897	Up Regulated
ENSG00000233096	ENSG00000233096.1		40970541	40971578	-1	lncRNA	novel transcript	28.1859	1.45588	0.341854	1.2e-06	2.56e-05	15	2	8	14	29	23	33	19	13.5689	1.54681	7.58158	14.0626	28.9303	23.5674	34.5723	20.3759	Up Regulated
ENSG00000279166	ENSG00000279166.1		144494265	144496878	-1	lncRNA	TEC	2762.31	0.507085	0.113378	1.22e-06	2.59e-05	2972	4431	3911	3466	4305	4353	4862	5157	2688.45	3426.97	3706.44	3481.5	4294.66	4460.39	5093.65	5530.45	Up Regulated
ENSG00000259177	ENSG00000259177.1		90393490	90397881	-1	lncRNA	novel transcript, antisense to IQGAP1	49.3104	0.748255	0.173464	1.39e-06	2.91e-05	54	49	54	65	80	80	89	92	48.848	37.8969	51.1756	65.2906	79.8079	81.9736	93.2404	98.6622	Up Regulated
ENSG00000215417	ENSG00000215417.12	MIR17HG	91347820	91354579	1	lncRNA	miR-17-92a-1 cluster host gene [Source:HGNC Symbol;Acc:HGNC:23564]	1136.13	0.881418	0.207594	1.57e-06	3.21e-05	455	919	527	515	809	993	1173	1041	411.59	710.761	499.436	517.303	807.057	1017.5	1228.89	1116.38	Up Regulated
ENSG00000232821	ENSG00000232821.1		19112474	19114271	1	lncRNA	novel transcript	94.4316	0.912809	0.216757	1.77e-06	3.56e-05	49	76	62	68	99	109	128	107	44.3251	58.7789	58.7572	68.304	98.7622	111.689	134.099	114.748	Up Regulated
ENSG00000229124	ENSG00000229124.6	VIM-AS1	17214239	17230018	-1	lncRNA	VIM antisense RNA 1 [Source:HGNC Symbol;Acc:HGNC:44879]	407.522	0.652278	0.152437	1.95e-06	3.85e-05	325	368	439	384	503	563	525	580	293.993	284.614	416.039	385.717	501.792	576.889	550.014	622.001	Up Regulated
ENSG00000261644	ENSG00000261644.2	CYLD-AS1	50727417	50742815	-1	lncRNA	CYLD antisense RNA 1 [Source:HGNC Symbol;Acc:HGNC:55352]	50.8718	0.763038	0.179835	1.99e-06	3.92e-05	43	52	46	25	66	68	67	55	38.8975	40.2172	43.5941	25.1118	65.8415	69.6775	70.1922	58.9828	Up Regulated
ENSG00000245694	ENSG00000245694.9	CRNDE	54845189	54929189	-1	lncRNA	colorectal neoplasia differentially expressed [Source:HGNC Symbol;Acc:HGNC:37078]	560.689	-0.402905	0.090534	2e-06	3.94e-05	742	786	574	541	420	456	459	368	671.208	607.898	543.978	543.419	418.991	467.249	480.869	394.649	Down Regulated
ENSG00000250602	ENSG00000250602.6		126372477	126509021	-1	lncRNA	novel transcript, antisense to GRAMD3	44.2662	0.789825	0.187921	2.16e-06	4.2e-05	41	65	54	67	83	73	92	111	37.0883	50.2715	51.1756	67.2996	82.8007	74.8009	96.3834	119.038	Up Regulated
ENSG00000285454	ENSG00000285454.1		42151028	42268110	1	lncRNA	novel transcript	17.0321	-1.50655	0.36837	2.19e-06	4.26e-05	45	68	10	94	19	11	15	15	40.7067	52.5917	9.47697	94.4203	18.9544	11.2714	15.7147	16.0862	Down Regulated
ENSG00000241155	ENSG00000241155.1	ARHGAP31-AS1	119314293	119322760	-1	lncRNA	ARHGAP31 antisense RNA 1 [Source:HGNC Symbol;Acc:HGNC:41235]	26.1735	1.18848	0.285825	2.45e-06	4.64e-05	28	22	18	16	51	46	39	43	25.3286	17.015	17.0585	16.0715	50.8775	47.1348	40.8582	46.1139	Up Regulated
ENSG00000281357	ENSG00000281357.2	ARRDC3-AS1	91380349	91616105	1	lncRNA	ARRDC3 antisense RNA 1 [Source:HGNC Symbol;Acc:HGNC:44145]	160.985	0.50029	0.115768	2.45e-06	4.65e-05	114	136	148	128	172	172	161	161	103.124	105.183	140.259	128.572	171.587	176.243	168.671	172.659	Up Regulated
ENSG00000232082	ENSG00000232082.1	RPS6KA2-IT1	166460663	166465383	-1	lncRNA	RPS6KA2 intronic transcript 1 [Source:HGNC Symbol;Acc:HGNC:41378]	68.3799	0.832439	0.200351	2.46e-06	4.65e-05	38	42	62	51	86	65	73	94	34.3745	32.4831	58.7572	51.228	85.7934	66.6035	76.4781	100.807	Up Regulated
ENSG00000222041	ENSG00000222041.11	CYTOR	87454781	87636740	1	lncRNA	cytoskeleton regulator RNA [Source:HGNC Symbol;Acc:HGNC:28717]	1180.33	0.358461	0.0805996	2.49e-06	4.7e-05	1275	1091	1102	772	1219	1186	1179	1210	1153.36	843.787	1044.36	775.452	1216.07	1215.26	1235.17	1297.62	Up Regulated
ENSG00000274270	ENSG00000274270.1		50125816	50128463	1	lncRNA	novel transcript, sense intronic to DLEU1	60.1526	0.828363	0.200209	2.8e-06	5.2e-05	57	95	53	50	119	109	100	84	51.5618	73.4737	50.2279	50.2236	118.714	111.689	104.765	90.0829	Up Regulated
ENSG00000271856	ENSG00000271856.1	LINC01215	108125821	108138610	1	lncRNA	long intergenic non-protein coding RNA 1215 [Source:HGNC Symbol;Acc:HGNC:49651]	29.8169	1.78222	0.433621	2.8e-06	5.2e-05	7	4	3	5	17	15	18	15	6.33215	3.09363	2.84309	5.02236	16.9592	15.37	18.8576	16.0862	Up Regulated
ENSG00000269609	ENSG00000269609.5	C10orf95-AS1	102449816	102461106	1	lncRNA	C10orf95 antisense RNA 1 [Source:HGNC Symbol;Acc:HGNC:45238]	114.5	-0.56265	0.134888	2.83e-06	5.24e-05	172	261	156	145	126	85	109	92	155.59	201.859	147.841	145.648	125.697	87.0969	114.193	98.6622	Down Regulated
ENSG00000270019	ENSG00000270019.1		113888203	113889767	-1	lncRNA	novel transcript	114.5	0.625216	0.148955	2.99e-06	5.48e-05	117	141	144	105	165	200	170	171	105.837	109.05	136.468	105.469	164.604	204.934	178.1	183.383	Up Regulated
ENSG00000280061	ENSG00000280061.1		30553956	30558058	1	lncRNA	TEC	51.8525	-0.958461	0.234348	3.03e-06	5.52e-05	66	85	51	62	26	24	27	33	59.7031	65.7396	48.3325	62.2772	25.9376	24.5921	28.2864	35.3897	Down Regulated
ENSG00000273445	ENSG00000273445.1		87477495	87478034	-1	lncRNA	novel transcript	49.0318	0.797854	0.194911	3.42e-06	6.14e-05	76	55	72	37	106	82	79	116	68.7491	42.5374	68.2342	37.1654	105.745	84.0229	82.764	124.4	Up Regulated
ENSG00000232295	ENSG00000232295.7		71221457	71328228	-1	lncRNA	novel transcript, antisense OGFRL1	157.114	1.00884	0.250592	3.49e-06	6.24e-05	38	48	39	68	82	103	102	80	34.3745	37.1235	36.9602	68.304	81.8031	105.541	106.86	85.7932	Up Regulated
ENSG00000280138	ENSG00000280138.1		122870059	122888720	-1	lncRNA	novel transcript	492.978	0.57024	0.135984	3.5e-06	6.24e-05	499	647	580	439	725	603	683	863	451.392	500.394	549.664	440.963	723.259	617.876	715.542	925.494	Up Regulated
ENSG00000259367	ENSG00000259367.1	AKAP13-AS1	85619623	85670948	-1	lncRNA	AKAP13 antisense RNA 1 [Source:HGNC Symbol;Acc:HGNC:55975]	39.161	1.18863	0.296216	3.67e-06	6.44e-05	6	24	22	14	28	39	34	41	5.42756	18.5618	20.8493	14.0626	27.9328	39.9621	35.6199	43.969	Up Regulated
ENSG00000232934	ENSG00000232934.7		112395813	112425589	-1	lncRNA	novel transcript, antisense to ACSL5	58.9624	0.850611	0.209759	3.67e-06	6.44e-05	50	66	68	72	89	97	106	135	45.2296	51.0449	64.4434	72.3219	88.7862	99.393	111.05	144.776	Up Regulated
ENSG00000253141	ENSG00000253141.1		173463484	173484584	1	lncRNA	novel transcript	82.1487	-0.993228	0.247111	3.85e-06	6.65e-05	56	65	36	109	36	31	20	23	50.6572	50.2715	34.1171	109.487	35.9135	31.7648	20.9529	24.6656	Down Regulated
ENSG00000280099	ENSG00000280099.1		85152487	85154203	-1	lncRNA	TEC	23.0704	-1.14145	0.285937	4.16e-06	7.11e-05	46	67	17	56	21	13	18	15	41.6113	51.8183	16.1108	56.2504	20.9496	13.3207	18.8576	16.0862	Down Regulated
ENSG00000259146	ENSG00000259146.3	SIPA1L1-AS1	71292729	71321882	-1	lncRNA	SIPA1L1 antisense RNA 1 [Source:HGNC Symbol;Acc:HGNC:55432]	35.8184	0.855505	0.212547	4.17e-06	7.11e-05	43	31	52	45	81	77	66	65	38.8975	23.9756	49.2802	45.2012	80.8055	78.8996	69.1446	69.707	Up Regulated
ENSG00000228606	ENSG00000228606.2	DCAF8-DT	160261731	160263328	1	lncRNA	DCAF8 divergent transcript [Source:HGNC Symbol;Acc:HGNC:55792]	75.6446	0.780944	0.19316	4.43e-06	7.5e-05	46	69	46	46	93	86	66	80	41.6113	53.3651	43.5941	46.2057	92.7766	88.1216	69.1446	85.7932	Up Regulated
ENSG00000255422	ENSG00000255422.3		118700415	118750263	1	lncRNA	novel transcript	132.646	0.911258	0.228912	4.84e-06	8.08e-05	49	91	112	12	124	116	111	104	44.3251	70.38	106.142	12.0537	123.702	118.862	116.289	111.531	Up Regulated
ENSG00000258424	ENSG00000258424.1		90402523	90405235	-1	lncRNA	novel transcript, antisense to CALM1	18.5922	-1.40373	0.358653	5.3e-06	8.76e-05	27	31	28	45	9	6	18	6	24.424	23.9756	26.5355	45.2012	8.97838	6.14802	18.8576	6.43449	Down Regulated
ENSG00000269439	ENSG00000269439.5	PGLS-DT	17488990	17511889	-1	lncRNA	PGLS divergent transcript [Source:HGNC Symbol;Acc:HGNC:55274]	116.047	-0.628764	0.155119	5.5e-06	9.05e-05	116	172	115	168	78	74	71	86	104.933	133.026	108.985	168.751	77.8127	75.8256	74.3828	92.2277	Down Regulated
ENSG00000222012	ENSG00000222012.1		157614023	157618765	1	lncRNA	novel transcript, antisense to PTPRN2	25.2509	-0.959059	0.243683	5.71e-06	9.34e-05	60	106	40	68	38	23	27	25	54.2756	81.9811	37.9079	68.304	37.9087	23.5674	28.2864	26.8104	Down Regulated
ENSG00000230068	ENSG00000230068.2	CDC42-IT1	22059197	22064199	1	lncRNA	CDC42 intronic transcript 1 [Source:HGNC Symbol;Acc:HGNC:41317]	72.7489	0.641068	0.157607	5.77e-06	9.4e-05	90	113	115	88	149	139	120	164	81.4134	87.395	108.985	88.3935	148.642	142.429	125.717	175.876	Up Regulated
ENSG00000285667	ENSG00000285667.1		84717474	84746837	-1	lncRNA	novel transcript	37.832	-0.723693	0.182053	6.5e-06	0.000104309	78	80	70	75	31	39	41	41	70.5583	61.8726	66.3388	75.3353	30.9255	39.9621	42.9535	43.969	Down Regulated
ENSG00000205181	ENSG00000205181.6	LINC00654	5482736	5526709	-1	lncRNA	long intergenic non-protein coding RNA 654 [Source:HGNC Symbol;Acc:HGNC:27154]	71.3965	-0.695041	0.174695	6.59e-06	0.000105275	156	220	96	130	81	89	67	68	141.117	170.15	90.9789	130.581	80.8055	91.1956	70.1922	72.9242	Down Regulated
ENSG00000232124	ENSG00000232124.2		44200602	44207399	-1	lncRNA	novel transcript	17.2711	-1.37008	0.353325	6.85e-06	0.000108905	30	33	30	17	4	10	10	9	27.1378	25.5224	28.4309	17.076	3.99039	10.2467	10.4765	9.65174	Down Regulated
ENSG00000280303	ENSG00000280303.2	ERICD	140636281	140638283	1	lncRNA	E2F1-regulated inhibitor of cell death [Source:HGNC Symbol;Acc:HGNC:49404]	99.1021	0.978655	0.254295	7.31e-06	0.000115205	37	32	42	58	80	91	77	70	33.4699	24.749	39.8033	58.2593	79.8079	93.2449	80.6687	75.0691	Up Regulated
ENSG00000226312	ENSG00000226312.7	CFLAR-AS1	201140278	201157823	-1	lncRNA	CFLAR antisense RNA 1 [Source:HGNC Symbol;Acc:HGNC:14437]	289.502	0.848238	0.21848	7.47e-06	0.000117006	253	273	314	287	437	434	457	565	228.862	211.14	297.577	288.283	435.95	444.707	478.774	605.915	Up Regulated
ENSG00000231233	ENSG00000231233.1	CFAP58-DT	104351300	104353625	-1	lncRNA	CFAP58 divergent transcript [Source:HGNC Symbol;Acc:HGNC:45243]	17.341	1.40929	0.370378	7.68e-06	0.00012017	4	11	14	15	31	29	27	28	3.61837	8.50748	13.2678	15.0671	30.9255	29.7154	28.2864	30.0276	Up Regulated
ENSG00000264895	ENSG00000264895.1		51249579	51251748	-1	lncRNA	novel transcript, sense intronic to MBTD1	47.8233	-0.701975	0.184186	7.76e-06	0.000121159	79	118	79	72	46	33	46	48	71.4628	91.262	74.8681	72.3219	45.8895	33.8141	48.1917	51.4759	Down Regulated
ENSG00000286186	ENSG00000286186.1		79460378	79465843	-1	lncRNA	novel transcript, antisense to NFATC1	70.7541	0.91674	0.238475	7.82e-06	0.000122059	39	33	60	77	118	101	75	84	35.2791	25.5224	56.8618	77.3443	117.717	103.492	78.5734	90.0829	Up Regulated
ENSG00000260912	ENSG00000260912.1		19453209	19455173	1	lncRNA	novel transcript, overlapping ACER2	76.738	-0.753775	0.195963	8.1e-06	0.000124998	111	110	67	83	33	53	45	48	100.41	85.0748	63.4957	83.3711	32.9207	54.3075	47.144	51.4759	Down Regulated
ENSG00000227028	ENSG00000227028.6	SLC8A1-AS1	39786453	40255209	1	lncRNA	SLC8A1 antisense RNA 1 [Source:HGNC Symbol;Acc:HGNC:44102]	866.843	0.639093	0.161822	8.2e-06	0.000126415	859	774	1475	825	1275	1401	1520	1448	777.045	598.617	1397.85	828.689	1271.94	1435.56	1592.42	1552.86	Up Regulated
ENSG00000165511	ENSG00000165511.6	ZNF22-AS1	44997698	45000888	-1	lncRNA	ZNF22 antisense RNA 1 [Source:HGNC Symbol;Acc:HGNC:23509]	71.1571	-0.662165	0.168254	8.57e-06	0.000130953	108	140	64	93	44	52	56	59	97.696	108.277	60.6526	93.4158	43.8943	53.2828	58.6681	63.2725	Down Regulated
ENSG00000240875	ENSG00000240875.5	LINC00886	156747343	156817062	-1	lncRNA	long intergenic non-protein coding RNA 886 [Source:HGNC Symbol;Acc:HGNC:48572]	119.55	0.537418	0.134357	8.87e-06	0.000134585	111	108	132	59	155	141	115	124	100.41	83.528	125.096	59.2638	154.628	144.478	120.479	132.98	Up Regulated
ENSG00000281404	ENSG00000281404.1	LINC01176	30390885	30412375	1	lncRNA	long intergenic non-protein coding RNA 1176 [Source:HGNC Symbol;Acc:HGNC:49548]	158.96	0.533722	0.133595	9.03e-06	0.000136685	203	230	320	150	280	277	306	313	183.632	177.884	303.263	150.671	279.328	283.834	320.579	335.666	Up Regulated
ENSG00000251136	ENSG00000251136.8	RIPK2-DT	89545424	89757812	-1	lncRNA	RIPK2 divergent transcript [Source:HGNC Symbol;Acc:HGNC:55545]	687.295	0.560008	0.140972	9.11e-06	0.000137535	648	620	698	835	896	867	981	1031	586.176	479.512	661.492	838.734	893.848	888.389	1027.74	1105.66	Up Regulated
ENSG00000261220	ENSG00000261220.2	ST3GAL1-DT	133572158	133573861	1	lncRNA	ST3GAL1 divergent transcript [Source:HGNC Symbol;Acc:HGNC:55372]	75.607	-0.646432	0.164619	9.11e-06	0.000137535	83	129	108	98	61	57	40	64	75.0812	99.7695	102.351	98.4382	60.8535	58.4062	41.9058	68.6346	Down Regulated
ENSG00000285517	ENSG00000285517.1		30795458	30879268	1	lncRNA	long intergenic non-protein coding RNA 941	266.034	-0.808619	0.212698	1.08e-05	0.000158588	156	214	114	292	98	98	92	79	141.117	165.509	108.037	293.306	97.7646	100.418	96.3834	84.7208	Down Regulated
ENSG00000273129	ENSG00000273129.1	PACERR	186680601	186683165	1	lncRNA	PTGS2 antisense NFKB1 complex-mediated expression regulator RNA [Source:HGNC Symbol;Acc:HGNC:50552]	12.6212	1.98333	0.533428	1.11e-05	0.000162799	3	12	5	3	29	21	14	28	2.71378	9.28088	4.73848	3.01341	28.9303	21.5181	14.667	30.0276	Up Regulated
ENSG00000283118	ENSG00000283118.1		144444848	144450450	1	lncRNA	novel transcript, antisense to ZEB2	538.213	0.555465	0.142644	1.28e-05	0.000183435	654	758	949	806	929	940	1155	1210	591.604	586.242	899.364	809.604	926.769	963.19	1210.03	1297.62	Up Regulated
ENSG00000224596	ENSG00000224596.7	ZMIZ1-AS1	78943328	79067895	-1	lncRNA	ZMIZ1 antisense RNA 1 [Source:HGNC Symbol;Acc:HGNC:27433]	485.294	0.648907	0.169678	1.31e-05	0.000186659	118	111	166	93	179	188	161	174	106.742	85.8482	157.318	93.4158	178.57	192.638	168.671	186.6	Up Regulated
ENSG00000273402	ENSG00000273402.1		237045	237669	1	lncRNA	novel transcript, antisense to ZNF596	17.2618	-1.58863	0.424724	1.36e-05	0.000193328	13	30	18	15	4	4	10	1	11.7597	23.2022	17.0585	15.0671	3.99039	4.09868	10.4765	1.07242	Down Regulated
ENSG00000227502	ENSG00000227502.2	MROCKI	113868013	113873390	-1	lncRNA	MARCKS cis regulating lncRNA promoter of cytokines and inflammation [Source:HGNC Symbol;Acc:HGNC:50323]	1323.76	0.864225	0.232251	1.39e-05	0.000196524	963	1204	1143	629	1445	1626	1766	1777	871.123	931.182	1083.22	631.812	1441.53	1666.11	1850.14	1905.68	Up Regulated
ENSG00000270640	ENSG00000270640.1		28396815	28397110	1	lncRNA	novel transcript, sense intronic to FOSL2	56.7676	1.06326	0.289406	1.41e-05	0.000198296	20	46	40	35	60	56	83	80	18.0919	35.5767	37.9079	35.1565	59.8559	57.3815	86.9546	85.7932	Up Regulated
ENSG00000232043	ENSG00000232043.1		50570975	50578041	-1	lncRNA	novel transcript, antisense to PTPN1	119.158	0.529261	0.136815	1.54e-05	0.000213323	137	152	115	136	179	172	173	178	123.929	117.558	108.985	136.608	178.57	176.243	181.243	190.89	Up Regulated
ENSG00000279198	ENSG00000279198.1		16074292	16077395	-1	lncRNA	TEC	49.5497	1.01792	0.279009	1.61e-05	0.000220308	44	97	74	47	129	128	124	116	39.8021	75.0205	70.1296	47.2102	128.69	131.158	129.908	124.4	Up Regulated
ENSG00000237232	ENSG00000237232.7	ZNF295-AS1	42009194	42055130	1	lncRNA	ZNF295 antisense RNA 1 [Source:HGNC Symbol;Acc:HGNC:23130]	20.5983	1.50518	0.415618	1.7e-05	0.000231917	5	4	11	5	10	23	11	27	4.52296	3.09363	10.4247	5.02236	9.97598	23.5674	11.5241	28.9552	Up Regulated
ENSG00000272980	ENSG00000272980.4		166999336	167139138	1	lncRNA	novel protein	32.1251	-0.965846	0.270206	2.12e-05	0.000280595	52	67	77	134	34	29	30	45	47.0388	51.8183	72.9727	134.599	33.9183	29.7154	31.4294	48.2587	Down Regulated
ENSG00000225057	ENSG00000225057.2		238231684	238255633	1	lncRNA	novel transcript	112.842	0.694638	0.189013	2.13e-05	0.000280773	76	110	125	145	168	165	163	190	68.7491	85.0748	118.462	145.648	167.597	169.071	170.766	203.759	Up Regulated
ENSG00000224374	ENSG00000224374.1		135259996	135260933	1	lncRNA	novel transcript	48.515	-0.918497	0.256679	2.16e-05	0.000284671	121	172	96	229	73	60	46	86	109.456	133.026	90.9789	230.024	72.8247	61.4802	48.1917	92.2277	Down Regulated
ENSG00000225077	ENSG00000225077.3	ICMT-DT	6234692	6239444	1	lncRNA	ICMT divergent transcript [Source:HGNC Symbol;Acc:HGNC:28620]	15.0305	-1.01186	0.28269	2.18e-05	0.000286352	42	42	31	28	13	16	14	13	37.9929	32.4831	29.3786	28.1252	12.9688	16.3947	14.667	13.9414	Down Regulated
ENSG00000153363	ENSG00000153363.12	LINC00467	211382736	211435570	1	lncRNA	long intergenic non-protein coding RNA 467 [Source:HGNC Symbol;Acc:HGNC:28227]	340.07	-0.36954	0.0938831	2.22e-05	0.000290846	413	444	343	237	261	243	221	219	373.597	343.393	325.06	238.06	260.373	248.995	231.53	234.859	Down Regulated
ENSG00000265743	ENSG00000265743.1	LINC02978	30964935	30965500	-1	lncRNA	long intergenic non-protein coding RNA 2978 [Source:HGNC Symbol;Acc:HGNC:56041]	165.29	0.559461	0.149106	2.23e-05	0.00029138	64	84	112	55	97	99	118	106	57.8939	64.9662	106.142	55.2459	96.767	101.442	123.622	113.676	Up Regulated
ENSG00000227398	ENSG00000227398.3	KIF9-AS1	47164186	47246601	1	lncRNA	KIF9 antisense RNA 1 [Source:HGNC Symbol;Acc:HGNC:26822]	71.3678	0.974359	0.274159	2.27e-05	0.000295717	40	44	52	73	101	81	110	104	36.1837	34.0299	49.2802	73.3264	100.757	82.9982	115.241	111.531	Up Regulated
ENSG00000233030	ENSG00000233030.2		149785659	149793020	-1	lncRNA	novel transcript, antisense to FCGR1A	100.476	-0.729465	0.200334	2.28e-05	0.000296661	84	170	84	187	54	59	81	66	75.9858	131.479	79.6065	187.836	53.8703	60.4555	84.8593	70.7794	Down Regulated
ENSG00000226889	ENSG00000226889.3	ATF6-DT	161749452	161766227	-1	lncRNA	ATF6 divergent transcript [Source:HGNC Symbol;Acc:HGNC:55826]	15.3248	1.89569	0.526435	2.35e-05	0.000304394	5	5	2	1	10	17	13	10	4.52296	3.86703	1.89539	1.00447	9.97598	17.4194	13.6194	10.7242	Up Regulated
ENSG00000259735	ENSG00000259735.1		59348648	59359889	-1	lncRNA	novel transcript, sense intronic to MYO1E	50.7148	0.890194	0.249861	2.44e-05	0.000314157	42	27	49	33	70	70	56	70	37.9929	20.882	46.4372	33.1476	69.8319	71.7269	58.6681	75.0691	Up Regulated
ENSG00000278600	ENSG00000278600.1		79920195	79922455	-1	lncRNA	novel transcript, sense intronic to ST20	398.574	-0.430056	0.111963	2.45e-05	0.000315359	357	451	300	421	244	220	242	257	322.94	348.807	284.309	422.882	243.414	225.427	253.53	275.611	Down Regulated
ENSG00000283341	ENSG00000283341.1		43578889	43840030	1	lncRNA	novel transcript	20.1942	-1.33867	0.380754	2.55e-05	0.000326347	17	32	38	25	7	10	9	8	15.3781	24.749	36.0125	25.1118	6.98319	10.2467	9.42881	8.57932	Down Regulated
ENSG00000254006	ENSG00000254006.5		64801236	64817573	-1	lncRNA	novel transcript	94.5139	-0.834114	0.235053	2.7e-05	0.000341981	193	251	115	223	75	83	110	85	174.586	194.125	108.985	223.997	74.8199	85.0476	115.241	91.1553	Down Regulated
ENSG00000228925	ENSG00000228925.1		46899275	46908678	1	lncRNA	novel transcript, antisense to MCFD2	43.6062	-0.830863	0.234907	2.95e-05	0.000367371	47	42	63	84	26	22	23	38	42.5159	32.4831	59.7049	84.3756	25.9376	22.5427	24.0958	40.7518	Down Regulated
ENSG00000247556	ENSG00000247556.6	OIP5-AS1	41283958	41322392	1	lncRNA	OIP5 antisense RNA 1 [Source:HGNC Symbol;Acc:HGNC:43563]	5676.11	-0.260336	0.0651226	2.95e-05	0.000367371	6190	8565	6252	6297	4823	4987	5033	4724	5599.43	6624.23	5925	6325.16	4811.42	5110.03	5272.8	5066.09	Down Regulated
ENSG00000254510	ENSG00000254510.1		66409158	66417227	1	lncRNA	novel transcript	47.3064	0.599188	0.164072	2.95e-05	0.000367371	83	82	68	90	124	124	109	91	75.0812	63.4194	64.4434	90.4024	123.702	127.059	114.193	97.5898	Up Regulated
ENSG00000248335	ENSG00000248335.1		140712168	140716081	1	lncRNA	novel transcript	18.1377	1.48161	0.432196	3.07e-05	0.000379433	11	3	12	5	24	12	22	30	9.95052	2.32022	11.3724	5.02236	23.9424	12.296	23.0482	32.1725	Up Regulated
ENSG00000224093	ENSG00000224093.5	BCAR3-AS1	93591966	93610605	1	lncRNA	BCAR3 antisense RNA 1 [Source:HGNC Symbol;Acc:HGNC:40093]	97.9535	0.673975	0.182141	3.1e-05	0.000382122	85	63	101	75	125	116	107	125	76.8904	48.7246	95.7174	75.3353	124.7	118.862	112.098	134.052	Up Regulated
ENSG00000257725	ENSG00000257725.1	LINC02399	89947693	89949726	1	lncRNA	long intergenic non-protein coding RNA 2399 [Source:HGNC Symbol;Acc:HGNC:53326]	22.9797	3.88666	1.23802	3.21e-05	0.000393797	0	0	0	1	6	7	4	7	0	0	0	1.00447	5.98559	7.17269	4.19058	7.50691	Up Regulated
ENSG00000272631	ENSG00000272631.1		86749754	86756298	-1	lncRNA	novel transcript, antisense to BMPR1A	26.7138	-1.03029	0.298464	3.25e-05	0.000397161	76	118	73	47	36	18	30	35	68.7491	91.262	69.1819	47.2102	35.9135	18.4441	31.4294	37.5345	Down Regulated
ENSG00000261366	ENSG00000261366.1	MANEA-DT	95575183	95577450	-1	lncRNA	MANEA divergent transcript [Source:HGNC Symbol;Acc:HGNC:43732]	185.891	-0.462016	0.127172	3.72e-05	0.000446442	251	253	269	184	139	163	159	122	227.053	195.672	254.93	184.823	138.666	167.021	166.576	130.835	Down Regulated
ENSG00000279355	ENSG00000279355.1	AGPAT4-IT1	161160105	161161982	-1	lncRNA	novel transcript	329.855	0.456822	0.123279	3.74e-05	0.000448023	237	166	242	151	295	252	228	213	214.389	128.386	229.343	151.675	294.291	258.217	238.863	228.424	Up Regulated
ENSG00000279243	ENSG00000279243.2	LINC02736	65487241	65488714	-1	lncRNA	long intergenic non-protein coding RNA 2736 [Source:HGNC Symbol;Acc:HGNC:54253]	30.1029	1.07376	0.31357	3.79e-05	0.000451942	24	10	12	7	35	26	26	21	21.7102	7.73407	11.3724	7.0313	34.9159	26.6414	27.2388	22.5207	Up Regulated
ENSG00000183242	ENSG00000183242.11	WT1-AS	32435518	32500632	1	lncRNA	WT1 antisense RNA [Source:HGNC Symbol;Acc:HGNC:18135]	133.226	-0.587076	0.163988	3.9e-05	0.000461994	261	300	210	343	164	156	159	142	236.099	232.022	199.016	344.534	163.606	159.848	166.576	152.283	Down Regulated
ENSG00000243960	ENSG00000243960.1		111438638	111441364	-1	lncRNA	novel transcript	21.2517	-1.21459	0.35732	4.15e-05	0.000485875	27	18	15	41	11	5	9	9	24.424	13.9213	14.2155	41.1833	10.9736	5.12335	9.42881	9.65174	Down Regulated
ENSG00000213279	ENSG00000213279.2		49572264	49575426	-1	lncRNA	novel transcript	21.8997	0.882177	0.257721	4.3e-05	0.000502213	25	43	20	29	49	47	44	62	22.6148	33.2565	18.9539	29.1297	48.8823	48.1595	46.0964	66.4898	Up Regulated
ENSG00000231064	ENSG00000231064.7	THBS3-AS1	155194996	155205495	1	lncRNA	THBS3 antisense RNA 1 [Source:HGNC Symbol;Acc:HGNC:40582]	98.5092	0.591295	0.166625	4.33e-05	0.00050416	91	84	96	126	143	164	119	127	82.318	64.9662	90.9789	126.563	142.657	168.046	124.67	136.197	Up Regulated
ENSG00000228852	ENSG00000228852.6		95243167	95278940	-1	lncRNA	novel transcript, antisense to RWDD3	50.8147	-0.753389	0.219355	4.36e-05	0.000506891	51	82	57	69	24	36	30	34	46.1342	63.4194	54.0187	69.3085	23.9424	36.8881	31.4294	36.4621	Down Regulated
ENSG00000227082	ENSG00000227082.2	LINC02798	121396754	121463508	1	lncRNA	long intergenic non-protein coding RNA 2798 [Source:HGNC Symbol;Acc:HGNC:54323]	240.463	0.427255	0.115768	4.56e-05	0.000524204	406	510	447	259	425	530	487	489	367.265	394.438	423.621	260.158	423.979	543.075	510.203	524.411	Up Regulated
ENSG00000229625	ENSG00000229625.3		98961428	98968284	1	lncRNA	novel transcript	43.6339	0.698061	0.20152	4.66e-05	0.000534719	60	54	50	80	94	101	86	89	54.2756	41.764	47.3848	80.3577	93.7742	103.492	90.0975	95.445	Up Regulated
ENSG00000235823	ENSG00000235823.2	OLMALINC	100373099	100454043	1	lncRNA	oligodendrocyte maturation-associated long intergenic non-coding RNA [Source:HGNC Symbol;Acc:HGNC:28060]	184.199	-0.644125	0.184298	4.69e-05	0.000536922	179	586	150	298	173	128	172	148	161.922	453.216	142.155	299.332	172.584	131.158	180.195	158.717	Down Regulated
ENSG00000258225	ENSG00000258225.1		78052181	78091737	-1	lncRNA	novel transcript, antisense to NAV3	9.93858	1.50154	0.458891	4.83e-05	0.000550928	5	9	16	15	11	30	44	46	4.52296	6.96066	15.1632	15.0671	10.9736	30.7401	46.0964	49.3311	Up Regulated
ENSG00000228323	ENSG00000228323.2	MYADM-AS1	53854581	53869107	-1	lncRNA	MYADM antisense RNA 1 [Source:HGNC Symbol;Acc:HGNC:40384]	25.1067	1.06595	0.32347	5.01e-05	0.000568225	17	18	30	37	50	67	40	55	15.3781	13.9213	28.4309	37.1654	49.8799	68.6529	41.9058	58.9828	Up Regulated
ENSG00000234807	ENSG00000234807.6	LINC01135	58784384	58901109	1	lncRNA	long intergenic non-protein coding RNA 1135 [Source:HGNC Symbol;Acc:HGNC:49450]	19.0397	1.2621	0.379578	5.07e-05	0.000573444	20	10	5	3	25	27	22	16	18.0919	7.73407	4.73848	3.01341	24.94	27.6661	23.0482	17.1586	Up Regulated
ENSG00000235321	ENSG00000235321.1		169100743	169101210	1	lncRNA	novel transcript	34.1818	-1.21379	0.370797	5.08e-05	0.00057383	47	85	37	174	28	26	32	30	42.5159	65.7396	35.0648	174.778	27.9328	26.6414	33.5247	32.1725	Down Regulated
ENSG00000237938	ENSG00000237938.5		15720312	15736896	-1	lncRNA	novel transcript, antisense to SLC25A34 and PLEKHM2	95.3062	0.568769	0.161425	5.1e-05	0.000576275	75	56	68	65	81	96	76	105	67.8445	43.3108	64.4434	65.2906	80.8055	98.3683	79.621	112.604	Up Regulated
ENSG00000263412	ENSG00000263412.1	NFE2L1-DT	48045141	48048107	-1	lncRNA	NFE2L1 divergent transcript [Source:HGNC Symbol;Acc:HGNC:54812]	27.2806	-0.847853	0.249285	5.11e-05	0.0005767	40	47	42	37	18	17	24	15	36.1837	36.3501	39.8033	37.1654	17.9568	17.4194	25.1435	16.0862	Down Regulated
ENSG00000247137	ENSG00000247137.8	ANKRD42-DT	83184491	83193794	-1	lncRNA	ANKRD42 divergent transcript [Source:HGNC Symbol;Acc:HGNC:55590]	135.898	0.516676	0.1438	5.99e-05	0.000658344	116	149	130	149	191	194	158	160	104.933	115.238	123.201	149.666	190.541	198.786	165.528	171.586	Up Regulated
ENSG00000257261	ENSG00000257261.5	SLC38A4-AS1	46383433	46876784	1	lncRNA	SLC38A4 antisense RNA 1 [Source:HGNC Symbol;Acc:HGNC:56178]	117.723	0.415855	0.11516	6.1e-05	0.000668649	161	193	172	131	179	209	192	202	145.639	149.268	163.004	131.586	178.57	214.156	201.148	216.628	Up Regulated
ENSG00000272335	ENSG00000272335.1		44826076	44828592	1	lncRNA	novel transcript	468.017	-0.378492	0.103456	6.28e-05	0.000684366	788	1030	828	976	604	602	605	568	712.819	796.609	784.693	980.364	602.549	616.851	633.825	609.132	Down Regulated
ENSG00000254288	ENSG00000254288.1		74052340	74099853	1	lncRNA	novel transcript	25.6218	1.07058	0.326695	6.39e-05	0.000694707	14	12	9	11	20	25	25	24	12.6643	9.28088	8.52927	11.0492	19.952	25.6167	26.1911	25.738	Up Regulated
ENSG00000226272	ENSG00000226272.5	ARHGAP26-AS1	142859604	142868922	-1	lncRNA	ARHGAP26 antisense RNA 1 [Source:HGNC Symbol;Acc:HGNC:40792]	112.333	0.920267	0.281705	6.6e-05	0.000715438	50	80	188	179	194	222	232	279	45.2296	61.8726	178.167	179.8	193.534	227.477	243.054	299.204	Up Regulated
ENSG00000226159	ENSG00000226159.1	LINC01375	89915489	89957373	-1	lncRNA	long intergenic non-protein coding RNA 1375 [Source:HGNC Symbol;Acc:HGNC:50632]	221.445	0.532574	0.154544	6.92e-05	0.000743712	402	299	606	310	530	557	567	508	363.646	231.249	574.304	311.386	528.727	570.741	594.015	544.787	Up Regulated
ENSG00000263069	ENSG00000263069.5	RNF213-AS1	80351828	80415168	-1	lncRNA	RNF213 antisense RNA 1 [Source:HGNC Symbol;Acc:HGNC:54402]	90.0971	0.7528	0.227011	7.14e-05	0.000764098	111	114	133	72	177	180	117	203	100.41	88.1684	126.044	72.3219	176.575	184.441	122.575	217.7	Up Regulated
ENSG00000279500	ENSG00000279500.1		128813186	128814750	-1	lncRNA	novel transcript	24.0881	-1.02291	0.317268	7.15e-05	0.000764098	34	47	53	76	25	14	19	24	30.7562	36.3501	50.2279	76.3398	24.94	14.3454	19.9053	25.738	Down Regulated
ENSG00000273680	ENSG00000273680.1		29332733	29333383	-1	lncRNA	novel transcript, antisense to FAR2	106.418	-0.444034	0.125207	7.27e-05	0.000774523	280	224	149	176	122	141	130	120	253.286	173.243	141.207	176.787	121.707	144.478	136.194	128.69	Down Regulated
ENSG00000236703	ENSG00000236703.1	MYB-AS1	135195083	135195995	-1	lncRNA	MYB antisense RNA 1 [Source:HGNC Symbol;Acc:HGNC:37457]	20.4109	-0.857247	0.262124	7.29e-05	0.000775401	67	142	64	59	43	38	27	35	60.6077	109.824	60.6526	59.2638	42.8967	38.9374	28.2864	37.5345	Down Regulated
ENSG00000245526	ENSG00000245526.10	LINC00461	88507546	88691057	-1	lncRNA	long intergenic non-protein coding RNA 461 [Source:HGNC Symbol;Acc:HGNC:42810]	16.5085	-0.78901	0.238428	7.5e-05	0.000790242	46	51	35	46	26	25	18	14	41.6113	39.4438	33.1694	46.2057	25.9376	25.6167	18.8576	15.0138	Down Regulated
ENSG00000284879	ENSG00000284879.1		87455476	87767359	1	lncRNA	novel transcript	26.6877	0.883745	0.273646	7.82e-05	0.000818285	19	11	32	40	32	53	45	53	17.1873	8.50748	30.3263	40.1789	31.9231	54.3075	47.144	56.838	Up Regulated
ENSG00000259668	ENSG00000259668.5		51455268	51460582	1	lncRNA	novel transcript, antisense to DMXL2	94.8402	0.652239	0.195762	8.19e-05	0.000852368	62	67	85	57	84	93	90	127	56.0848	51.8183	80.5542	57.2549	83.7983	95.2943	94.2881	136.197	Up Regulated
ENSG00000234608	ENSG00000234608.7	MAPKAPK5-AS1	111839758	111842902	-1	lncRNA	MAPKAPK5 antisense RNA 1 [Source:HGNC Symbol;Acc:HGNC:24091]	248.464	-0.343664	0.0973675	8.31e-05	0.000863219	209	289	214	214	173	165	138	141	189.06	223.515	202.807	214.957	172.584	169.071	144.575	151.211	Down Regulated
ENSG00000280042	ENSG00000280042.1		124791119	124793104	-1	lncRNA	TEC	167.827	0.611991	0.182818	8.38e-05	0.000869188	77	43	95	65	117	92	78	112	69.6537	33.2565	90.0312	65.2906	116.719	94.2696	81.7163	120.111	Up Regulated
ENSG00000230753	ENSG00000230753.5	ZNF341-AS1	33787373	33811109	-1	lncRNA	ZNF341 antisense RNA 1 [Source:HGNC Symbol;Acc:HGNC:50736]	29.7019	1.05449	0.329316	8.59e-05	0.000888034	11	11	14	5	22	17	19	25	9.95052	8.50748	13.2678	5.02236	21.9472	17.4194	19.9053	26.8104	Up Regulated
ENSG00000285366	ENSG00000285366.1		142946569	142947105	-1	lncRNA	TEC	83.7961	0.653285	0.195501	8.73e-05	0.00089883	62	77	140	84	139	124	132	137	56.0848	59.5523	132.678	84.3756	138.666	127.059	138.289	146.921	Up Regulated
ENSG00000232684	ENSG00000232684.1	ATP11A-AS1	112745449	112754693	-1	lncRNA	ATP11A antisense RNA 1 [Source:HGNC Symbol;Acc:HGNC:40645]	27.4393	0.753751	0.231236	8.81e-05	0.000905466	35	43	35	40	62	59	49	72	31.6608	33.2565	33.1694	40.1789	61.8511	60.4555	51.3346	77.2139	Up Regulated
ENSG00000212939	ENSG00000212939.2		49548681	49556473	1	lncRNA	novel transcript	54.3479	0.645873	0.194958	8.96e-05	0.000917127	78	88	98	67	125	112	117	125	70.5583	68.0598	92.8743	67.2996	124.7	114.763	122.575	134.052	Up Regulated
ENSG00000245149	ENSG00000245149.3	RNF139-DT	124462485	124474582	-1	lncRNA	RNF139 divergent transcript [Source:HGNC Symbol;Acc:HGNC:48940]	250.872	-0.438209	0.129615	9.08e-05	0.000927577	316	244	325	392	220	220	185	177	285.851	188.711	308.002	393.753	219.472	225.427	193.814	189.818	Down Regulated
ENSG00000285653	ENSG00000285653.1		9840340	9841559	-1	lncRNA	novel transcript, antisense to RAB31	51.8551	0.670442	0.201243	9.22e-05	0.000940157	59	57	64	47	95	79	79	81	53.371	44.0842	60.6526	47.2102	94.7718	80.9489	82.764	86.8656	Up Regulated
ENSG00000238113	ENSG00000238113.6	LINC01410	62801461	62813486	1	lncRNA	long intergenic non-protein coding RNA 1410 [Source:HGNC Symbol;Acc:HGNC:50702]	766.576	-0.365409	0.1001	9.26e-05	0.000943044	1000	1226	905	1110	737	709	699	679	904.593	948.197	857.666	1114.96	735.23	726.491	732.304	728.17	Down Regulated
ENSG00000224699	ENSG00000224699.8	LAMTOR5-AS1	110347116	110443817	1	lncRNA	LAMTOR5 antisense RNA 1 [Source:HGNC Symbol;Acc:HGNC:40823]	333.318	-0.277366	0.0751598	9.35e-05	0.000952219	610	683	591	517	429	446	389	437	551.802	528.237	560.089	519.312	427.97	457.003	407.534	468.646	Down Regulated
ENSG00000237596	ENSG00000237596.6		135991936	136225751	-1	lncRNA	novel transcript	91.8066	-0.560917	0.16724	9.42e-05	0.000957084	207	252	230	353	168	139	128	159	187.251	194.899	217.97	354.578	167.597	142.429	134.099	170.514	Down Regulated
ENSG00000181800	ENSG00000181800.5	CELF2-AS1	11316833	11319884	-1	lncRNA	CELF2 antisense RNA 1 [Source:HGNC Symbol;Acc:HGNC:23515]	497.143	0.387746	0.109518	9.57e-05	0.00096735	1047	1277	1124	836	1277	1223	1237	1241	947.109	987.641	1065.21	839.738	1273.93	1253.17	1295.94	1330.87	Up Regulated
ENSG00000245556	ENSG00000245556.2	SCAMP1-AS1	78342333	78360507	-1	lncRNA	SCAMP1 antisense RNA 1 [Source:HGNC Symbol;Acc:HGNC:50544]	125.794	-0.422583	0.121376	0.000101373	0.00101383	208	217	216	124	103	123	131	123	188.155	167.829	204.703	124.554	102.753	126.034	137.242	131.907	Down Regulated
ENSG00000269961	ENSG00000269961.1	ERBIN-DT	65924629	65925135	-1	lncRNA	ERBIN divergent transcript [Source:HGNC Symbol;Acc:HGNC:55270]	29.3089	0.780308	0.242355	0.000102313	0.00102072	22	32	22	14	35	49	30	31	19.901	24.749	20.8493	14.0626	34.9159	50.2088	31.4294	33.2449	Up Regulated
ENSG00000272477	ENSG00000272477.1		18408680	18409635	-1	lncRNA	novel transcript, sense intronic to SATB1	65.5897	-0.830132	0.261995	0.000102521	0.00102229	193	285	128	103	57	78	84	89	174.586	220.421	121.305	103.461	56.8631	79.9242	88.0022	95.445	Down Regulated
ENSG00000267607	ENSG00000267607.1	ICAM4-AS1	10285801	10289019	-1	lncRNA	ICAM4 antisense RNA 1 [Source:HGNC Symbol;Acc:HGNC:55990]	19.9443	2.79274	0.847081	0.000106892	0.00105757	1	0	1	2	4	10	13	7	0.904593	0	0.947697	2.00894	3.99039	10.2467	13.6194	7.50691	Up Regulated
ENSG00000279207	ENSG00000279207.1		58095672	58101479	1	lncRNA	novel transcript	69.9233	-0.630398	0.192609	0.000110653	0.00108695	110	128	48	100	36	56	65	46	99.5052	98.9961	45.4895	100.447	35.9135	57.3815	68.0969	49.3311	Down Regulated
ENSG00000233834	ENSG00000233834.6	MACC1-DT	20217536	20221702	1	lncRNA	MACC1 divergent transcript [Source:HGNC Symbol;Acc:HGNC:55702]	28.6422	2.42086	0.762387	0.000112902	0.00110253	1	1	2	2	10	15	5	8	0.904593	0.773407	1.89539	2.00894	9.97598	15.37	5.23823	8.57932	Up Regulated
ENSG00000232386	ENSG00000232386.9		100849561	100861756	1	lncRNA	novel transcript	13.7901	-1.37642	0.450129	0.000123004	0.00118243	11	17	23	29	6	4	6	7	9.95052	13.1479	21.797	29.1297	5.98559	4.09868	6.28587	7.50691	Down Regulated
ENSG00000279549	ENSG00000279549.1		61143380	61145464	-1	lncRNA	novel transcript	119.832	0.549534	0.166871	0.000123608	0.00118655	83	146	110	102	126	126	129	204	75.0812	112.917	104.247	102.456	125.697	129.108	135.146	218.773	Up Regulated
ENSG00000236778	ENSG00000236778.7	INTS6-AS1	51452364	51554678	1	lncRNA	INTS6 antisense RNA 1 [Source:HGNC Symbol;Acc:HGNC:42691]	267.244	-0.336029	0.094984	0.000123723	0.00118655	332	361	239	300	214	219	205	194	300.325	279.2	226.5	301.341	213.486	224.403	214.767	208.049	Down Regulated
ENSG00000253187	ENSG00000253187.2	HOXA10-AS	27168619	27171915	1	lncRNA	HOXA10 antisense RNA [Source:HGNC Symbol;Acc:HGNC:40281]	42.6376	-0.634262	0.197053	0.0001303	0.00123733	71	81	70	56	31	34	45	36	64.2261	62.646	66.3388	56.2504	30.9255	34.8388	47.144	38.607	Down Regulated
ENSG00000256733	ENSG00000256733.1	LINC02954	61055392	61067597	1	lncRNA	long intergenic non-protein coding RNA 2954 [Source:HGNC Symbol;Acc:HGNC:55972]	24.5362	1.04856	0.343803	0.000131346	0.0012461	11	18	14	11	23	15	25	46	9.95052	13.9213	13.2678	11.0492	22.9448	15.37	26.1911	49.3311	Up Regulated
ENSG00000249870	ENSG00000249870.1		51042524	51085471	1	lncRNA	novel transcript	42.6252	0.971885	0.319044	0.000131745	0.0012493	13	20	20	31	38	34	42	48	11.7597	15.4681	18.9539	31.1386	37.9087	34.8388	44.0011	51.4759	Up Regulated
ENSG00000215068	ENSG00000215068.7	ANXA2R-AS1	43041572	43064272	1	lncRNA	ANXA2R antisense RNA 1 [Source:HGNC Symbol;Acc:HGNC:27208]	890.705	0.343201	0.0977181	0.000132031	0.00125143	1698	2232	1575	1269	2042	1965	1756	1794	1536	1726.24	1492.62	1274.67	2037.1	2013.48	1839.67	1923.91	Up Regulated
ENSG00000279901	ENSG00000279901.1		2683106	2684764	1	lncRNA	tec	14.8029	-1.19021	0.389591	0.00013259	0.00125614	19	37	20	19	6	5	9	11	17.1873	28.6161	18.9539	19.085	5.98559	5.12335	9.42881	11.7966	Down Regulated
ENSG00000231535	ENSG00000231535.6	LINC00278	3002887	3200509	1	lncRNA	long intergenic non-protein coding RNA 278 [Source:HGNC Symbol;Acc:HGNC:38712]	849.366	0.420679	0.123677	0.000135748	0.00127973	608	818	1166	562	832	892	1124	948	549.993	632.647	1105.01	564.513	830.002	914.005	1177.55	1016.65	Up Regulated
ENSG00000206573	ENSG00000206573.8	THUMPD3-AS1	9349689	9398579	-1	lncRNA	THUMPD3 antisense RNA 1 [Source:HGNC Symbol;Acc:HGNC:44478]	1021.25	0.340786	0.0972096	0.000135773	0.00127973	845	1120	942	962	979	1098	1096	1176	764.381	866.216	892.731	966.301	976.649	1125.09	1148.22	1261.16	Up Regulated
ENSG00000258136	ENSG00000258136.1	PRDM4-AS1	107736555	107759968	1	lncRNA	PRDM4 antisense RNA 1 [Source:HGNC Symbol;Acc:HGNC:56186]	35.8366	-0.791839	0.254465	0.000138545	0.00130284	42	53	76	33	24	19	19	32	37.9929	40.9906	72.025	33.1476	23.9424	19.4687	19.9053	34.3173	Down Regulated
ENSG00000227896	ENSG00000227896.2	WAPL-DT	86521945	86525101	1	lncRNA	WAPL divergent transcript [Source:HGNC Symbol;Acc:HGNC:55805]	17.505	-0.875726	0.28466	0.000143663	0.00134038	30	56	31	53	23	13	22	15	27.1378	43.3108	29.3786	53.237	22.9448	13.3207	23.0482	16.0862	Down Regulated
ENSG00000272695	ENSG00000272695.1	GAS6-DT	113864112	113866834	1	lncRNA	GAS6 divergent transcript [Source:HGNC Symbol;Acc:HGNC:43694]	12.9729	-1.37408	0.460797	0.000148309	0.00137367	15	15	6	47	4	7	7	6	13.5689	11.6011	5.68618	47.2102	3.99039	7.17269	7.33352	6.43449	Down Regulated
ENSG00000264270	ENSG00000264270.1		75683543	75684799	-1	lncRNA	novel transcript, antisense to SAP30BP	32.8795	0.764141	0.247583	0.000154119	0.00141463	28	39	32	30	52	57	42	56	25.3286	30.1629	30.3263	30.1341	51.8751	58.4062	44.0011	60.0553	Up Regulated
ENSG00000280832	ENSG00000280832.1	GSEC	126340882	126355587	-1	lncRNA	G-quadruplex forming sequence containing lncRNA [Source:HGNC Symbol;Acc:HGNC:48645]	129.708	-0.62262	0.197551	0.000160097	0.00145955	534	527	180	173	192	192	172	174	483.053	407.585	170.585	173.774	191.539	196.737	180.195	186.6	Down Regulated
ENSG00000255197	ENSG00000255197.5		47381509	47409369	-1	lncRNA	novel transcript	144.324	0.586717	0.184762	0.0001635	0.00148325	93	113	171	97	171	203	158	130	84.1271	87.395	162.056	97.4337	170.589	208.008	165.528	139.414	Up Regulated
ENSG00000248092	ENSG00000248092.7	NNT-AS1	43571594	43603230	-1	lncRNA	NNT antisense RNA 1 [Source:HGNC Symbol;Acc:HGNC:49005]	506.562	-0.291385	0.0828546	0.000168319	0.00151921	1005	1158	804	727	659	633	629	647	909.116	895.605	761.948	730.251	657.417	648.616	658.969	693.853	Down Regulated
ENSG00000221949	ENSG00000221949.5	LINC01465	62601751	62603690	-1	lncRNA	long intergenic non-protein coding RNA 1465 [Source:HGNC Symbol;Acc:HGNC:26364]	149.463	0.473338	0.144802	0.00017287	0.0015548	150	140	153	165	193	223	194	162	135.689	108.277	144.998	165.738	192.536	228.501	203.243	173.731	Up Regulated
ENSG00000272256	ENSG00000272256.1		30082758	30083467	1	lncRNA	novel transcript, antisense to TMEM66	53.5444	0.787687	0.260591	0.000175797	0.00157651	45	26	51	32	88	62	53	54	40.7067	20.1086	48.3325	32.1431	87.7886	63.5295	55.5252	57.9104	Up Regulated
ENSG00000248187	ENSG00000248187.1		128567972	128570531	-1	lncRNA	novel transcript	703.013	0.767365	0.253326	0.000176981	0.00158573	53	55	89	24	104	100	68	86	47.9434	42.5374	84.345	24.1073	103.75	102.467	71.2399	92.2277	Up Regulated
ENSG00000268686	ENSG00000268686.1		49368558	49388091	-1	lncRNA	novel transcript, antisense to DKKL1	150.508	-0.430432	0.131741	0.000179186	0.00160477	229	366	162	206	154	157	135	144	207.152	283.067	153.527	206.921	153.63	160.873	141.432	154.428	Down Regulated
ENSG00000280219	ENSG00000280219.1		147487971	147496062	1	lncRNA	TEC	44.3932	-1.01297	0.348192	0.000190889	0.00169316	47	34	43	112	37	12	23	21	42.5159	26.2958	40.751	112.501	36.9111	12.296	24.0958	22.5207	Down Regulated
ENSG00000180066	ENSG00000180066.9	LINC02870	132444327	132449408	1	lncRNA	long intergenic non-protein coding RNA 2870 [Source:HGNC Symbol;Acc:HGNC:27275]	37.4125	-0.819512	0.275804	0.00019453	0.00172162	95	148	51	137	48	53	53	38	85.9363	114.464	48.3325	137.613	47.8847	54.3075	55.5252	40.7518	Down Regulated
ENSG00000259370	ENSG00000259370.2		62827675	62884034	-1	lncRNA	novel transcript, antisense to TLN2	48.4722	0.634029	0.205557	0.00019703	0.00173701	72	64	95	48	120	102	84	99	65.1307	49.498	90.0312	48.2146	119.712	104.516	88.0022	106.169	Up Regulated
ENSG00000265342	ENSG00000265342.1		75394123	75394963	1	lncRNA	novel transcript, antisense to GRB2	19.0966	0.772162	0.252095	0.000198464	0.0017489	11	28	30	26	46	31	38	38	9.95052	21.6554	28.4309	26.1163	45.8895	31.7648	39.8105	40.7518	Up Regulated
ENSG00000274315	ENSG00000274315.1		29331434	29331936	-1	lncRNA	novel transcript, antisense to FAR2	105.442	-0.443945	0.136472	0.000205647	0.00180203	213	243	149	214	123	125	115	141	192.678	187.938	141.207	214.957	122.705	128.084	120.479	151.211	Down Regulated
ENSG00000279145	ENSG00000279145.2		55171378	55176739	-1	lncRNA	TEC	118.749	-0.487291	0.152301	0.00021147	0.00184543	93	144	114	128	84	70	68	63	84.1271	111.371	108.037	128.572	83.7983	71.7269	71.2399	67.5622	Down Regulated
ENSG00000225798	ENSG00000225798.1		58889967	58894082	1	lncRNA	novel transcript	19.4757	-1.14807	0.398561	0.000213296	0.00185704	31	22	22	25	15	8	8	3	28.0424	17.015	20.8493	25.1118	14.964	8.19736	8.38116	3.21725	Down Regulated
ENSG00000279537	ENSG00000279537.1		40244925	40247366	1	lncRNA	TEC	48.4509	0.724807	0.241979	0.000213633	0.00185917	49	28	36	39	70	54	61	55	44.3251	21.6554	34.1171	39.1744	69.8319	55.3322	63.9064	58.9828	Up Regulated
ENSG00000282961	ENSG00000282961.1	PRNCR1	127079874	127092600	1	lncRNA	prostate cancer associated non-coding RNA 1 [Source:HGNC Symbol;Acc:HGNC:48942]	26.4765	0.799393	0.2704	0.000214638	0.00186553	21	36	55	37	70	47	58	75	18.9965	27.8427	52.1233	37.1654	69.8319	48.1595	60.7634	80.4312	Up Regulated
ENSG00000270133	ENSG00000270133.1		94611906	94618122	-1	lncRNA	novel transcript, sense intronic to C5orf36	22.6396	-0.972049	0.337102	0.000215774	0.00187459	51	39	60	59	20	15	21	27	46.1342	30.1629	56.8618	59.2638	19.952	15.37	22.0006	28.9552	Down Regulated
ENSG00000224972	ENSG00000224972.1		6902670	6978859	1	lncRNA	novel transcript	32.0482	0.745444	0.249673	0.000216579	0.00187918	24	41	47	25	46	45	64	62	21.7102	31.7097	44.5418	25.1118	45.8895	46.1101	67.0493	66.4898	Up Regulated
ENSG00000280693	ENSG00000280693.2	SH3PXD2A-AS1	103745966	103755423	1	lncRNA	SH3PXD2A antisense RNA 1 [Source:HGNC Symbol;Acc:HGNC:45242]	27.9431	0.790337	0.262332	0.000217993	0.00188741	36	22	38	22	52	37	38	67	32.5653	17.015	36.0125	22.0984	51.8751	37.9128	39.8105	71.8518	Up Regulated
ENSG00000269243	ENSG00000269243.1		16123661	16139892	-1	lncRNA	novel transcript, antisense RAB8A	88.7168	-0.826497	0.283128	0.000220609	0.001906	119	309	130	532	145	106	129	114	107.647	238.983	123.201	534.379	144.652	108.615	135.146	122.255	Down Regulated
ENSG00000250733	ENSG00000250733.5	C8orf17	139931172	139933942	1	lncRNA	chromosome 8 putative open reading frame 17 [Source:HGNC Symbol;Acc:HGNC:17737]	23.4105	0.79655	0.270207	0.000223039	0.00192454	26	31	33	28	47	31	44	74	23.5194	23.9756	31.274	28.1252	46.8871	31.7648	46.0964	79.3587	Up Regulated
ENSG00000286171	ENSG00000286171.1		148941483	148941638	1	lncRNA	RNA, Ro-associated Y5	64.2305	-1.30954	0.47901	0.000232506	0.00199437	163	167	37	13	36	34	19	16	147.449	129.159	35.0648	13.0581	35.9135	34.8388	19.9053	17.1586	Down Regulated
ENSG00000223960	ENSG00000223960.6	CHROMR	178413635	178440243	1	lncRNA	cholesterol induced regulator of metabolism RNA [Source:HGNC Symbol;Acc:HGNC:54059]	503.502	-0.320916	0.0951384	0.000243173	0.00206902	899	997	660	548	503	503	567	523	813.229	771.087	625.48	550.45	501.792	515.409	594.015	560.873	Down Regulated
ENSG00000236526	ENSG00000236526.1	BTBD3-AS1	11909404	11918677	-1	lncRNA	BTBD3 antisense RNA 1 [Source:HGNC Symbol;Acc:HGNC:40728]	85.9198	-0.563697	0.183946	0.00024779	0.00209801	161	118	133	195	91	77	97	78	145.639	91.262	126.044	195.872	90.7814	78.8996	101.622	83.6484	Down Regulated
ENSG00000259398	ENSG00000259398.1		52033707	52035625	1	lncRNA	novel transcript, intronic to MAPK6	37.4456	0.703943	0.239141	0.00026394	0.00221627	26	44	42	40	53	51	62	68	23.5194	34.0299	39.8033	40.1789	52.8727	52.2582	64.954	72.9242	Up Regulated
ENSG00000285108	ENSG00000285108.1		129685401	129723023	-1	lncRNA	novel transcript	104.088	-0.637278	0.207946	0.000264542	0.00221907	143	285	135	317	126	107	118	115	129.357	220.421	127.939	318.417	125.697	109.64	123.622	123.328	Down Regulated
ENSG00000259276	ENSG00000259276.1		85621264	85627689	-1	lncRNA	novel transcript, antisense to AKAP13	72.3033	0.577204	0.191497	0.000279863	0.00232403	41	55	80	83	90	84	90	98	37.0883	42.5374	75.8158	83.3711	89.7838	86.0723	94.2881	105.097	Up Regulated
ENSG00000286039	ENSG00000286039.1		173508072	173511790	1	lncRNA	novel transcript	112.664	-0.46282	0.145655	0.00028819	0.00237474	133	129	71	113	72	76	65	58	120.311	99.7695	67.2865	113.505	71.8271	77.8749	68.0969	62.2001	Down Regulated
ENSG00000231889	ENSG00000231889.7	TRAF3IP2-AS1	111483459	111598783	1	lncRNA	TRAF3IP2 antisense RNA 1 [Source:HGNC Symbol;Acc:HGNC:40005]	230.949	0.404103	0.126715	0.00030385	0.00248262	335	322	335	371	428	329	399	479	303.039	249.037	317.478	372.659	426.972	337.116	418.011	513.687	Up Regulated
ENSG00000255557	ENSG00000255557.1		65745729	65771585	1	lncRNA	novel transcript	19.0078	-0.891684	0.315134	0.000305554	0.00249416	30	52	18	29	11	8	16	18	27.1378	40.2172	17.0585	29.1297	10.9736	8.19736	16.7623	19.3035	Down Regulated
ENSG00000237943	ENSG00000237943.6	PRKCQ-AS1	6580419	6616921	1	lncRNA	PRKCQ antisense RNA 1 [Source:HGNC Symbol;Acc:HGNC:44689]	47.9436	-0.502587	0.163899	0.000307526	0.0025056	90	126	96	114	54	76	57	62	81.4134	97.4493	90.9789	114.51	53.8703	77.8749	59.7158	66.4898	Down Regulated
ENSG00000226758	ENSG00000226758.1	DISC1-IT1	231925834	231945233	1	lncRNA	DISC1 intronic transcript 1 [Source:HGNC Symbol;Acc:HGNC:41325]	97.6963	0.665144	0.228792	0.000315148	0.0025554	78	152	181	144	214	209	169	242	70.5583	117.558	171.533	144.644	213.486	214.156	177.052	259.525	Up Regulated
ENSG00000274536	ENSG00000274536.6	MIR223HG	66015414	66020426	1	lncRNA	MIR223 host gene [Source:HGNC Symbol;Acc:HGNC:54520]	323.251	-0.501358	0.164934	0.000328525	0.00264696	442	654	469	932	371	400	400	313	399.83	505.808	444.47	936.167	370.109	409.868	419.058	335.666	Down Regulated
ENSG00000259972	ENSG00000259972.2		74305127	74335346	-1	lncRNA	novel transcript, antisense to PSMD7	222.32	0.308445	0.0932843	0.000328742	0.00264767	205	258	237	217	252	254	224	277	185.442	199.539	224.604	217.97	251.395	260.266	234.673	297.059	Up Regulated
ENSG00000281769	ENSG00000281769.1	LINC01230	1045625	1048641	1	lncRNA	long intergenic non-protein coding RNA 1230 [Source:HGNC Symbol;Acc:HGNC:49686]	50.3138	-0.934041	0.340329	0.000329097	0.00264948	49	48	21	145	28	36	17	28	44.3251	37.1235	19.9016	145.648	27.9328	36.8881	17.81	30.0276	Down Regulated
ENSG00000281501	ENSG00000281501.1	SEPSECS-AS1	25160641	25201440	1	lncRNA	SEPSECS antisense RNA 1 (head to head) [Source:HGNC Symbol;Acc:HGNC:27737]	486.235	0.324113	0.0987181	0.00032933	0.0026503	513	557	652	349	607	514	567	613	464.056	430.788	617.898	350.56	605.542	526.68	594.015	657.391	Up Regulated
ENSG00000267325	ENSG00000267325.1	LINC01415	55776727	55781722	-1	lncRNA	long intergenic non-protein coding RNA 1415 [Source:HGNC Symbol;Acc:HGNC:50709]	31.2232	-1.0084	0.35864	0.000329923	0.00265373	27	26	14	13	8	7	9	6	24.424	20.1086	13.2678	13.0581	7.98079	7.17269	9.42881	6.43449	Down Regulated
ENSG00000260293	ENSG00000260293.2		2476558	2482173	1	lncRNA	novel transcript, intronic to TBC1D24	10.871	-1.07201	0.390077	0.000332828	0.00267104	25	26	13	34	11	3	13	8	22.6148	20.1086	12.3201	34.152	10.9736	3.07401	13.6194	8.57932	Down Regulated
ENSG00000253716	ENSG00000253716.5	MINCR	143280152	143281705	-1	lncRNA	MYC-induced long non-coding RNA [Source:HGNC Symbol;Acc:HGNC:51653]	82.1722	-0.519578	0.17221	0.000339971	0.00271686	94	108	91	112	55	77	50	52	85.0317	83.528	86.2404	112.501	54.8679	78.8996	52.3823	55.7656	Down Regulated
ENSG00000226149	ENSG00000226149.5		129439485	129576047	-1	lncRNA	novel transcript	209.819	0.465068	0.151248	0.000341323	0.00272629	167	142	173	100	154	179	195	202	151.067	109.824	163.952	100.447	153.63	183.416	204.291	216.628	Up Regulated
ENSG00000227066	ENSG00000227066.1		20154171	20160568	1	lncRNA	novel transcript	141.843	-0.534041	0.178642	0.000348827	0.00277531	250	143	96	142	88	78	96	97	226.148	110.597	90.9789	142.635	87.7886	79.9242	100.574	104.024	Down Regulated
ENSG00000270362	ENSG00000270362.1	HMGN3-AS1	79233699	79236797	1	lncRNA	HMGN3 antisense RNA 1 [Source:HGNC Symbol;Acc:HGNC:48984]	551.619	-0.290197	0.0876007	0.000352424	0.00279627	655	714	737	659	472	522	458	492	592.508	552.213	698.453	661.947	470.866	534.878	479.822	527.628	Down Regulated
ENSG00000253372	ENSG00000253372.5		122807746	122816517	1	lncRNA	novel transcript	84.6606	0.562868	0.191058	0.000363495	0.00286286	91	93	98	103	120	108	134	167	82.318	71.9268	92.8743	103.461	119.712	110.664	140.384	179.093	Up Regulated
ENSG00000270012	ENSG00000270012.1		49273054	49275768	1	lncRNA	novel transcript	64.6818	-0.49651	0.167369	0.000392752	0.00304604	94	114	96	118	56	50	72	69	85.0317	88.1684	90.9789	118.528	55.8655	51.2335	75.4305	73.9967	Down Regulated
ENSG00000226471	ENSG00000226471.6		28800683	28848559	1	lncRNA	novel transcript	43.4442	0.600469	0.20731	0.000394082	0.00305286	27	53	26	39	48	41	60	55	24.424	40.9906	24.6401	39.1744	47.8847	42.0115	62.8587	58.9828	Up Regulated
ENSG00000271857	ENSG00000271857.1		45421079	45422005	-1	lncRNA	novel transcript, antisense to RUNX2	97.845	-0.490304	0.163344	0.000395016	0.00305602	155	225	134	131	85	109	85	97	140.212	174.017	126.991	131.586	84.7958	111.689	89.0499	104.024	Down Regulated
ENSG00000228393	ENSG00000228393.3	LINC01004	104950315	105013068	-1	lncRNA	long intergenic non-protein coding RNA 1004 [Source:HGNC Symbol;Acc:HGNC:48961]	169.337	0.533689	0.176194	0.000401063	0.00309161	160	194	169	227	220	197	251	327	144.735	150.041	160.161	228.015	219.472	201.86	262.959	350.68	Up Regulated
ENSG00000260273	ENSG00000260273.1		109382795	109383667	1	lncRNA	novel transcript, antisense to CD164	55.6739	0.688024	0.244259	0.000403	0.00310066	40	29	25	25	73	43	36	31	36.1837	22.4288	23.6924	25.1118	72.8247	44.0608	37.7152	33.2449	Up Regulated
ENSG00000280560	ENSG00000280560.1	LINC01374	89853595	90225443	1	lncRNA	long intergenic non-protein coding RNA 1374 [Source:HGNC Symbol;Acc:HGNC:50631]	104.434	0.392423	0.125737	0.00040318	0.00310087	196	179	231	157	198	225	217	263	177.3	138.44	218.918	157.702	197.524	230.551	227.339	282.045	Up Regulated
ENSG00000282865	ENSG00000282865.1		92239835	92241951	-1	lncRNA	TEC	46.7111	-0.606825	0.211193	0.000409717	0.00314162	106	100	46	77	44	40	49	41	95.8869	77.3407	43.5941	77.3443	43.8943	40.9868	51.3346	43.969	Down Regulated
ENSG00000253438	ENSG00000253438.3	PCAT1	126556323	127419050	1	lncRNA	prostate cancer associated transcript 1 [Source:HGNC Symbol;Acc:HGNC:43022]	54.8798	0.508892	0.170554	0.000413235	0.00316502	63	68	116	63	95	93	101	117	56.9894	52.5917	109.933	63.2817	94.7718	95.2943	105.812	125.473	Up Regulated
ENSG00000258733	ENSG00000258733.5	LINC02328	85911438	86161539	1	lncRNA	long intergenic non-protein coding RNA 2328 [Source:HGNC Symbol;Acc:HGNC:53248]	103.49	0.524625	0.177918	0.000413416	0.00316521	60	73	99	33	87	78	94	91	54.2756	56.4587	93.822	33.1476	86.791	79.9242	98.4787	97.5898	Up Regulated
ENSG00000250592	ENSG00000250592.1		130899414	130929976	-1	lncRNA	novel transcript, antisense to ATP2C1	19.4745	0.787291	0.28832	0.000424286	0.00322051	19	12	33	24	36	28	43	42	17.1873	9.28088	31.274	24.1073	35.9135	28.6908	45.0488	45.0414	Up Regulated
ENSG00000273343	ENSG00000273343.1		20318119	20318749	-1	lncRNA	novel transcript, sense intronic to DGCR6L	16.1153	-0.953295	0.358027	0.000428683	0.00324782	33	31	18	24	7	10	16	8	29.8516	23.9756	17.0585	24.1073	6.98319	10.2467	16.7623	8.57932	Down Regulated
ENSG00000224750	ENSG00000224750.6		90454170	90502968	1	lncRNA	novel transcript	6.61752	-1.61383	0.635878	0.000435348	0.0032885	31	13	3	42	5	5	10	0	28.0424	10.0543	2.84309	42.1878	4.98799	5.12335	10.4765	0	Down Regulated
ENSG00000279412	ENSG00000279412.1		70713987	70716890	1	lncRNA	novel transcript	280.475	0.463551	0.154834	0.000443775	0.00334098	179	243	291	232	337	273	258	328	161.922	187.938	275.78	233.037	336.191	279.735	270.293	351.752	Up Regulated
ENSG00000225733	ENSG00000225733.5	FGD5-AS1	14920347	14948424	-1	lncRNA	FGD5 antisense RNA 1 [Source:HGNC Symbol;Acc:HGNC:40410]	3647.57	-0.256108	0.0777681	0.000455763	0.00340975	4488	4899	3648	2710	2862	2977	2908	2473	4059.81	3788.92	3457.2	2722.12	2855.13	3050.44	3046.55	2652.08	Down Regulated
ENSG00000244286	ENSG00000244286.1	ITGB5-AS1	124781155	124787757	1	lncRNA	ITGB5 antisense RNA 1 [Source:HGNC Symbol;Acc:HGNC:40309]	45.7076	0.747798	0.273412	0.000457138	0.00341557	23	14	24	16	32	25	29	39	20.8056	10.8277	22.7447	16.0715	31.9231	25.6167	30.3817	41.8242	Up Regulated
ENSG00000285838	ENSG00000285838.1		68040290	68093001	1	lncRNA	novel transcript	53.3196	-0.562182	0.196194	0.000465194	0.00346377	113	178	101	147	64	74	88	70	102.219	137.666	95.7174	147.657	63.8463	75.8256	92.1928	75.0691	Down Regulated
ENSG00000268157	ENSG00000268157.1		49356152	49357769	1	lncRNA	novel transcript, antisense to TEAD2	39.3724	-0.667023	0.240557	0.000468871	0.00348854	87	65	45	37	37	35	21	24	78.6996	50.2715	42.6464	37.1654	36.9111	35.8634	22.0006	25.738	Down Regulated
ENSG00000237803	ENSG00000237803.5	LINC00211	37820498	37876274	-1	lncRNA	long intergenic non-protein coding RNA 211 [Source:HGNC Symbol;Acc:HGNC:37459]	16.8248	-0.915258	0.346095	0.000473605	0.00351925	35	31	22	45	14	10	15	15	31.6608	23.9756	20.8493	45.2012	13.9664	10.2467	15.7147	16.0862	Down Regulated
ENSG00000247735	ENSG00000247735.2	KCTD13-DT	29926836	29928933	1	lncRNA	KCTD13 divergent transcript [Source:HGNC Symbol;Acc:HGNC:55585]	22.4953	-0.782063	0.288379	0.000486933	0.00359658	39	60	27	22	13	13	18	22	35.2791	46.4044	25.5878	22.0984	12.9688	13.3207	18.8576	23.5931	Down Regulated
ENSG00000266709	ENSG00000266709.1		14303854	14305505	1	lncRNA	novel transcript	54.2214	0.809353	0.30435	0.000498804	0.0036656	20	48	41	37	56	56	64	73	18.0919	37.1235	38.8556	37.1654	55.8655	57.3815	67.0493	78.2863	Up Regulated
ENSG00000231125	ENSG00000231125.2		29058073	29060095	-1	lncRNA	novel transcript, sense intronic to CCT8	51.4488	-0.636433	0.229478	0.000502263	0.00368835	68	92	68	100	34	54	49	33	61.5123	71.1534	64.4434	100.447	33.9183	55.3322	51.3346	35.3897	Down Regulated
ENSG00000250132	ENSG00000250132.6		974133	991190	-1	lncRNA	novel transcript	43.7291	-0.572036	0.208183	0.000508015	0.00371814	59	51	55	34	23	24	21	39	53.371	39.4438	52.1233	34.152	22.9448	24.5921	22.0006	41.8242	Down Regulated
ENSG00000246859	ENSG00000246859.2	STARD4-AS1	111510396	111739726	1	lncRNA	STARD4 antisense RNA 1 [Source:HGNC Symbol;Acc:HGNC:44117]	965.622	-0.482868	0.165444	0.00051466	0.00376306	2110	1819	1392	1612	1150	1023	1009	932	1908.69	1406.83	1319.19	1619.21	1147.24	1048.24	1057.07	999.491	Down Regulated
ENSG00000256972	ENSG00000256972.1		115333577	115340262	1	lncRNA	novel transcript	67.5825	0.571394	0.202851	0.000529049	0.00384266	43	74	97	43	68	96	99	92	38.8975	57.2321	91.9266	43.1923	67.8367	98.3683	103.717	98.6622	Up Regulated
ENSG00000279913	ENSG00000279913.1		99844138	99844696	1	lncRNA	TEC	28.6907	0.672419	0.246269	0.000529141	0.00384266	45	34	35	29	49	48	68	52	40.7067	26.2958	33.1694	29.1297	48.8823	49.1841	71.2399	55.7656	Up Regulated
ENSG00000284968	ENSG00000284968.1		86924630	86936202	-1	lncRNA	Novel transcript, antisense to AFF1	85.6757	-0.46674	0.160253	0.000529528	0.00384409	96	135	155	107	65	71	63	96	86.8409	104.41	146.893	107.478	64.8439	72.7516	66.0017	102.952	Down Regulated
ENSG00000225791	ENSG00000225791.6	TRAM2-AS1	52576787	52643058	1	lncRNA	TRAM2 antisense RNA 1 (head to head) [Source:HGNC Symbol;Acc:HGNC:48663]	162.385	-0.390222	0.128142	0.000530266	0.00384808	224	237	139	127	129	133	107	94	202.629	183.297	131.73	127.568	128.69	136.281	112.098	100.807	Down Regulated
ENSG00000279077	ENSG00000279077.1		79352458	79354567	1	lncRNA	TEC	60.9627	0.520579	0.181972	0.000535857	0.00388171	62	48	109	66	98	81	90	113	56.0848	37.1235	103.299	66.2951	97.7646	82.9982	94.2881	121.183	Up Regulated
ENSG00000280205	ENSG00000280205.1		76385642	76389406	-1	lncRNA	TEC	72.942	0.659879	0.243297	0.000566098	0.00404452	89	185	124	155	206	158	161	300	80.5088	143.08	117.514	155.693	205.505	161.898	168.671	321.725	Up Regulated
ENSG00000197536	ENSG00000197536.11	IRF1-AS1	132410636	132488702	1	lncRNA	IRF1 antisense RNA 1 [Source:HGNC Symbol;Acc:HGNC:33838]	203.785	0.346939	0.112364	0.000567781	0.00405085	317	365	364	236	384	369	309	392	286.756	282.294	344.962	237.055	383.078	378.103	323.722	420.387	Up Regulated
ENSG00000280326	ENSG00000280326.1		140591684	140593201	1	lncRNA	TEC	88.4523	0.645742	0.238911	0.00058215	0.00413738	48	35	62	104	95	85	92	108	43.4205	27.0692	58.7572	104.465	94.7718	87.0969	96.3834	115.821	Up Regulated
ENSG00000280060	ENSG00000280060.1		43894725	43895182	-1	lncRNA	TEC	24.5601	1.03127	0.404147	0.000591556	0.00419434	9	3	8	8	14	5	20	20	8.14134	2.32022	7.58158	8.03577	13.9664	5.12335	20.9529	21.4483	Up Regulated
ENSG00000279191	ENSG00000279191.1	AC068491.4	111321433	111324812	-1	lncRNA	novel transcript	126.065	0.426438	0.1449	0.00060686	0.0042756	107	129	133	135	163	116	151	187	96.7914	99.7695	126.044	135.604	162.609	118.862	158.194	200.542	Up Regulated
ENSG00000224934	ENSG00000224934.4	GOT1-DT	99430915	99463259	1	lncRNA	GOT1 divergent transcript [Source:HGNC Symbol;Acc:HGNC:55848]	31.4766	-0.657686	0.245086	0.000612677	0.00430612	52	92	104	68	28	39	50	42	47.0388	71.1534	98.5605	68.304	27.9328	39.9621	52.3823	45.0414	Down Regulated
ENSG00000261253	ENSG00000261253.2		89321133	89325110	1	lncRNA	novel transcript, antisense to ANKRD11	43.9572	0.633843	0.23431	0.000614993	0.00431198	42	49	49	43	70	56	55	88	37.9929	37.8969	46.4372	43.1923	69.8319	57.3815	57.6205	94.3726	Up Regulated
ENSG00000258449	ENSG00000258449.1		25096868	25100980	-1	lncRNA	novel transcript, antisense to LRMP	19.0585	-0.886383	0.349485	0.00061606	0.00431497	66	71	50	56	24	22	23	30	59.7031	54.9119	47.3848	56.2504	23.9424	22.5427	24.0958	32.1725	Down Regulated
ENSG00000286194	ENSG00000286194.1		30968785	30970307	1	lncRNA	Novel transcript	82.9731	0.498927	0.17517	0.000621	0.00434059	42	66	70	26	66	65	62	71	37.9929	51.0449	66.3388	26.1163	65.8415	66.6035	64.954	76.1415	Up Regulated
ENSG00000262703	ENSG00000262703.1		11348143	11349321	-1	lncRNA	novel transcript, antisense to RMI2	18.4207	-0.619989	0.229489	0.000625616	0.00436834	49	50	45	39	25	22	22	26	44.3251	38.6703	42.6464	39.1744	24.94	22.5427	23.0482	27.8828	Down Regulated
ENSG00000226983	ENSG00000226983.2	LINC01692	24840550	25057746	1	lncRNA	long intergenic non-protein coding RNA 1692 [Source:HGNC Symbol;Acc:HGNC:52480]	11.562	-1.34755	0.568467	0.000631902	0.00439712	10	26	19	99	9	7	10	17	9.04593	20.1086	18.0062	99.4427	8.97838	7.17269	10.4765	18.2311	Down Regulated
ENSG00000261504	ENSG00000261504.1	LINC01686	182615254	182616629	1	lncRNA	long intergenic non-protein coding RNA 1686 [Source:HGNC Symbol;Acc:HGNC:27643]	65.6295	0.653689	0.244038	0.000634665	0.00441196	44	40	17	39	41	48	65	55	39.8021	30.9363	16.1108	39.1744	40.9015	49.1841	68.0969	58.9828	Up Regulated
ENSG00000258752	ENSG00000258752.1		89349377	89366081	1	lncRNA	novel transcript, antisense to FOXN3	55.1775	0.671092	0.253484	0.000651129	0.00451004	65	60	85	94	134	111	86	140	58.7985	46.4044	80.5542	94.4203	133.678	113.738	90.0975	150.138	Up Regulated
ENSG00000286018	ENSG00000286018.1		29063446	29064368	1	lncRNA	novel transcript, antisense to CCT8	104.045	-0.419116	0.143021	0.000655511	0.00453036	130	175	138	169	98	86	108	91	117.597	135.346	130.782	169.756	97.7646	88.1216	113.146	97.5898	Down Regulated
ENSG00000277245	ENSG00000277245.1		56447120	56447697	1	lncRNA	novel transcript, antisense to MNS1	35.1295	-0.78716	0.30719	0.000667709	0.00459902	74	30	53	54	26	20	30	20	66.9399	23.2022	50.2279	54.2415	25.9376	20.4934	31.4294	21.4483	Down Regulated
ENSG00000250413	ENSG00000250413.1	SLC2A9-AS1	10006482	10009725	1	lncRNA	SLC2A9 antisense RNA 1 [Source:HGNC Symbol;Acc:HGNC:40636]	14.1146	-0.874318	0.346604	0.000670822	0.00461264	50	60	34	17	14	14	21	16	45.2296	46.4044	32.2217	17.076	13.9664	14.3454	22.0006	17.1586	Down Regulated
ENSG00000271828	ENSG00000271828.1		56927874	56929573	1	lncRNA	novel transcript, antisense to MIER3	29.826	-0.612419	0.225877	0.000679077	0.00465361	42	54	37	39	21	26	22	21	37.9929	41.764	35.0648	39.1744	20.9496	26.6414	23.0482	22.5207	Down Regulated
ENSG00000259732	ENSG00000259732.1		59121034	59133250	1	lncRNA	novel transcript, sense overlapping to CCNB2	87.4972	0.546259	0.199636	0.000721056	0.00489181	39	53	59	44	73	69	62	62	35.2791	40.9906	55.9141	44.1967	72.8247	70.7022	64.954	66.4898	Up Regulated
ENSG00000275580	ENSG00000275580.1		49343608	49344254	1	lncRNA	novel transcript, sense intronic to GALK2	34.1842	-0.642817	0.244878	0.000732781	0.00495316	61	64	56	64	35	30	35	25	55.1802	49.498	53.071	64.2862	34.9159	30.7401	36.6676	26.8104	Down Regulated
ENSG00000260360	ENSG00000260360.1		179953184	179954705	-1	lncRNA	novel transcript	87.6126	0.440793	0.154025	0.000739009	0.0049791	84	105	75	97	110	115	133	89	75.9858	81.2077	71.0773	97.4337	109.736	117.837	139.337	95.445	Up Regulated
ENSG00000268912	ENSG00000268912.1		58428632	58431148	-1	lncRNA	novel transcript	73.1665	-0.422299	0.146169	0.000746827	0.00502303	96	108	82	95	60	63	59	55	86.8409	83.528	77.7112	95.4248	59.8559	64.5542	61.8111	58.9828	Down Regulated
ENSG00000267737	ENSG00000267737.1		78315729	78347798	1	lncRNA	novel transcript	19.1109	0.805251	0.319199	0.00075039	0.00503699	19	21	16	21	25	44	40	24	17.1873	16.2415	15.1632	21.0939	24.94	45.0855	41.9058	25.738	Up Regulated
ENSG00000234311	ENSG00000234311.1		132433733	132441484	-1	lncRNA	novel transcript	138.258	-0.502649	0.181675	0.000754512	0.0050563	310	388	182	273	156	169	173	162	280.424	300.082	172.481	274.221	155.625	173.169	181.243	173.731	Down Regulated
ENSG00000277767	ENSG00000277767.1		110916004	110917827	1	lncRNA	novel transcript	76.6817	0.530567	0.194108	0.000779038	0.00519002	46	43	29	29	50	51	56	40	41.6113	33.2565	27.4832	29.1297	49.8799	52.2582	58.6681	42.8966	Up Regulated
ENSG00000228079	ENSG00000228079.2		64086353	64088246	-1	lncRNA	novel transcript	22.3022	1.11897	0.474002	0.000786035	0.00523038	6	6	17	12	16	22	22	36	5.42756	4.64044	16.1108	12.0537	15.9616	22.5427	23.0482	38.607	Up Regulated
ENSG00000267858	ENSG00000267858.5	MZF1-AS1	58559125	58574797	1	lncRNA	MZF1 antisense RNA 1 [Source:HGNC Symbol;Acc:HGNC:51271]	157.037	0.374775	0.127658	0.000799575	0.00529712	184	195	160	162	234	232	180	174	166.445	150.814	151.632	162.724	233.438	237.723	188.576	186.6	Up Regulated
ENSG00000279518	ENSG00000279518.1		134783694	134785879	-1	lncRNA	TEC	68.8683	1.04409	0.445873	0.000825978	0.00544717	10	16	32	42	59	54	63	48	9.04593	12.3745	30.3263	42.1878	58.8583	55.3322	66.0017	51.4759	Up Regulated
ENSG00000272931	ENSG00000272931.1	LRRC8D-DT	89820174	89820868	-1	lncRNA	LRRC8D divergent transcript [Source:HGNC Symbol;Acc:HGNC:55186]	41.4055	-0.597389	0.225589	0.000846054	0.00555252	57	72	48	80	34	35	38	30	51.5618	55.6853	45.4895	80.3577	33.9183	35.8634	39.8105	32.1725	Down Regulated
ENSG00000280383	ENSG00000280383.1		45657019	45680130	1	lncRNA	novel transcript, sense overlapping ATXN10	218.055	-0.40085	0.14263	0.000861287	0.00563066	289	424	272	425	230	207	207	245	261.427	327.925	257.774	426.9	229.448	212.107	216.863	262.742	Down Regulated
ENSG00000279933	ENSG00000279933.1		44183031	44187739	-1	lncRNA	TEC	109.524	-0.448482	0.161132	0.000889803	0.00578728	239	252	200	244	169	127	105	168	216.198	194.899	189.539	245.091	168.594	130.133	110.003	180.166	Down Regulated
ENSG00000240549	ENSG00000240549.2	THOC7-AS1	63860645	63861819	1	lncRNA	THOC7 antisense RNA 1 [Source:HGNC Symbol;Acc:HGNC:41249]	17.0729	-0.746387	0.30234	0.000897575	0.0058285	24	52	43	41	15	13	18	27	21.7102	40.2172	40.751	41.1833	14.964	13.3207	18.8576	28.9552	Down Regulated
ENSG00000279611	ENSG00000279611.1		58350795	58351720	1	lncRNA	novel transcript	29.1662	0.840472	0.349229	0.000910873	0.005896	19	10	28	19	29	49	31	30	17.1873	7.73407	26.5355	19.085	28.9303	50.2088	32.477	32.1725	Up Regulated
ENSG00000255201	ENSG00000255201.1		38421889	38426096	1	lncRNA	novel transcript	13.9519	0.889062	0.377235	0.000924738	0.00597052	9	8	15	3	19	14	20	14	8.14134	6.18726	14.2155	3.01341	18.9544	14.3454	20.9529	15.0138	Up Regulated
ENSG00000267141	ENSG00000267141.1		1860250	1862019	1	lncRNA	novel transcript, antisense to KLF16	25.6587	-0.85468	0.347489	0.000927359	0.00598364	20	29	30	50	11	13	16	15	18.0919	22.4288	28.4309	50.2236	10.9736	13.3207	16.7623	16.0862	Down Regulated
ENSG00000233845	ENSG00000233845.1		47035279	47040524	-1	lncRNA	novel transcript	104.047	0.54903	0.207867	0.000930654	0.00600109	111	232	240	148	237	197	251	310	100.41	179.43	227.447	148.662	236.431	201.86	262.959	332.449	Up Regulated
ENSG00000251141	ENSG00000251141.5	MRPS30-DT	44742420	44808777	-1	lncRNA	MRPS30 divergent transcript [Source:HGNC Symbol;Acc:HGNC:53420]	69.1178	-0.385079	0.134445	0.000936291	0.00602964	198	230	182	190	130	112	148	123	179.109	177.884	172.481	190.85	129.688	114.763	155.052	131.907	Down Regulated
ENSG00000228988	ENSG00000228988.1		70218589	70221023	-1	lncRNA	novel transcript	21.5791	0.682308	0.271458	0.000951796	0.0060987	22	24	25	19	45	36	35	24	19.901	18.5618	23.6924	19.085	44.8919	36.8881	36.6676	25.738	Up Regulated
ENSG00000203364	ENSG00000203364.2		93147040	93148556	1	lncRNA	novel transcript	11.4366	1.5872	0.653997	0.000965947	0.0061827	4	1	2	1	5	4	8	11	3.61837	0.773407	1.89539	1.00447	4.98799	4.09868	8.38116	11.7966	Up Regulated
ENSG00000269506	ENSG00000269506.2		54059597	54061210	1	lncRNA	novel transcript, antisense to CHIC2	194.472	0.435976	0.157067	0.000966428	0.0061827	212	183	200	160	188	229	255	262	191.774	141.533	189.539	160.715	187.548	234.649	267.15	280.973	Up Regulated
ENSG00000255045	ENSG00000255045.1		124744634	124746337	-1	lncRNA	novel transcript	19.8542	-0.993031	0.42481	0.00100137	0.00636417	37	26	20	16	13	7	8	8	33.4699	20.1086	18.9539	16.0715	12.9688	7.17269	8.38116	8.57932	Down Regulated
ENSG00000260918	ENSG00000260918.1		47431960	47438959	1	lncRNA	novel transcript, overlapping GABRB1	10.9699	-0.775653	0.318032	0.00100248	0.00636918	26	30	24	36	13	15	12	12	23.5194	23.2022	22.7447	36.161	12.9688	15.37	12.5717	12.869	Down Regulated
ENSG00000267632	ENSG00000267632.1		42509784	42511519	1	lncRNA	novel transcript	167.224	0.329738	0.111377	0.00101342	0.00642664	176	209	195	177	197	192	202	257	159.208	161.642	184.801	177.791	196.527	196.737	211.624	275.611	Up Regulated
ENSG00000225335	ENSG00000225335.3		18076527	18078884	-1	lncRNA	novel transcript	30.0952	-0.673863	0.269887	0.00102309	0.00646978	52	46	45	34	33	13	18	23	47.0388	35.5767	42.6464	34.152	32.9207	13.3207	18.8576	24.6656	Down Regulated
ENSG00000249816	ENSG00000249816.6	LINC00964	124823702	124962531	1	lncRNA	long intergenic non-protein coding RNA 964 [Source:HGNC Symbol;Acc:HGNC:27226]	31.7259	1.32722	0.563413	0.00107909	0.00675496	5	1	4	1	1	12	9	9	4.52296	0.773407	3.79079	1.00447	0.997598	12.296	9.42881	9.65174	Up Regulated
ENSG00000286179	ENSG00000286179.1		48007875	48022237	-1	lncRNA	novel transcript	39.7787	-0.575157	0.225698	0.00107916	0.00675496	62	72	58	122	40	42	42	47	56.0848	55.6853	54.9664	122.545	39.9039	43.0361	44.0011	50.4035	Down Regulated
ENSG00000235770	ENSG00000235770.5	LINC00607	215611563	215848954	-1	lncRNA	long intergenic non-protein coding RNA 607 [Source:HGNC Symbol;Acc:HGNC:43944]	38.1041	1.22248	0.525657	0.00109848	0.00685691	4	4	5	1	11	11	10	4	3.61837	3.09363	4.73848	1.00447	10.9736	11.2714	10.4765	4.28966	Up Regulated
ENSG00000278095	ENSG00000278095.1		26273329	26273900	-1	lncRNA	novel transcript, antisense to SSPN	9.47668	2.87354	1.10171	0.00115559	0.00716021	1	0	1	0	8	4	6	4	0.904593	0	0.947697	0	7.98079	4.09868	6.28587	4.28966	Up Regulated
ENSG00000185332	ENSG00000185332.8	TMEM105	81311270	81330674	-1	lncRNA	TMEM105 long non-coding RNA [Source:HGNC Symbol;Acc:HGNC:26794]	81.4554	-0.67684	0.279902	0.00115624	0.00716021	88	214	100	203	71	79	79	65	79.6042	165.509	94.7697	203.908	70.8295	80.9489	82.764	69.707	Down Regulated
ENSG00000246695	ENSG00000246695.7	RASSF8-AS1	25936683	25959765	-1	lncRNA	RASSF8 antisense RNA 1 [Source:HGNC Symbol;Acc:HGNC:48637]	245.872	-0.339085	0.118075	0.00115774	0.00716371	176	178	176	229	141	114	132	124	159.208	137.666	166.795	230.024	140.661	116.812	138.289	132.98	Down Regulated
ENSG00000247373	ENSG00000247373.3	TMED2-DT	123575891	123585115	-1	lncRNA	TMED2 divergent transcript [Source:HGNC Symbol;Acc:HGNC:53346]	90.7621	-0.395442	0.142206	0.00116161	0.00718251	154	183	136	104	100	91	86	87	139.307	141.533	128.887	104.465	99.7598	93.2449	90.0975	93.3001	Down Regulated
ENSG00000251131	ENSG00000251131.1		43018145	43024678	1	lncRNA	novel transcript	47.2151	-0.457342	0.17097	0.00118992	0.00730421	120	135	94	87	69	67	65	59	108.551	104.41	89.0835	87.389	68.8343	68.6529	68.0969	63.2725	Down Regulated
ENSG00000231131	ENSG00000231131.7	LNCAROD	52450874	52755509	-1	lncRNA	lncRNA activating regulator of DKK1 [Source:HGNC Symbol;Acc:HGNC:50913]	312.858	0.272851	0.0914927	0.00119307	0.00731689	336	394	376	199	361	357	309	362	303.943	304.722	356.334	199.89	360.133	365.807	323.722	388.214	Up Regulated
ENSG00000233672	ENSG00000233672.6	RNASEH2B-AS1	50862172	50910764	-1	lncRNA	RNASEH2B antisense RNA 1 [Source:HGNC Symbol;Acc:HGNC:39967]	222.857	-0.445199	0.165881	0.00119585	0.00732731	258	386	219	482	204	181	208	228	233.385	298.535	207.546	484.155	203.51	185.465	217.91	244.511	Down Regulated
ENSG00000286153	ENSG00000286153.1		34836286	34884882	1	lncRNA	novel transcript, antisense to RUNX1	540.928	0.340431	0.119242	0.00121724	0.00744265	510	649	733	668	703	701	700	825	461.342	501.941	694.662	670.987	701.312	718.293	733.352	884.743	Up Regulated
ENSG00000281383	ENSG00000281383.1		8254592	8255514	-1	lncRNA	novel transcript, similar to YY1 associated myogenesis RNA 1 YAM1	9.62038	-1.55491	0.742004	0.00123044	0.00749902	7	72	4	14	5	9	3	2	6.33215	55.6853	3.79079	14.0626	4.98799	9.22203	3.14294	2.14483	Down Regulated
ENSG00000271855	ENSG00000271855.1		9555899	9556775	1	lncRNA	novel transcript	24.2627	0.78219	0.334285	0.00123052	0.00749902	13	14	15	13	27	31	22	15	11.7597	10.8277	14.2155	13.0581	26.9352	31.7648	23.0482	16.0862	Up Regulated
ENSG00000236546	ENSG00000236546.1	MYCL-AS1	39897745	39899098	1	lncRNA	MYCL antisense RNA 1 [Source:HGNC Symbol;Acc:HGNC:40386]	80.5028	0.478515	0.18245	0.00125937	0.00764624	116	103	124	68	154	135	113	129	104.933	79.6609	117.514	68.304	153.63	138.33	118.384	138.342	Up Regulated
ENSG00000278765	ENSG00000278765.1		48066704	48067293	-1	lncRNA	novel transcript	15.9901	-0.739848	0.313175	0.00125957	0.00764624	40	24	38	26	15	17	12	15	36.1837	18.5618	36.0125	26.1163	14.964	17.4194	12.5717	16.0862	Down Regulated
ENSG00000258521	ENSG00000258521.1		100339832	100340554	1	lncRNA	novel transcript, antisense to WARS	29.3622	0.706327	0.298021	0.00126688	0.00767686	14	41	29	33	48	48	47	44	12.6643	31.7097	27.4832	33.1476	47.8847	49.1841	49.2393	47.1863	Up Regulated
ENSG00000275278	ENSG00000275278.1		29156448	29156991	-1	lncRNA	novel transcript, antisense to FAR2	397.052	-0.454206	0.17164	0.00127779	0.00773373	694	852	611	910	500	456	421	476	627.788	658.943	579.043	914.069	498.799	467.249	441.059	510.47	Down Regulated
ENSG00000255571	ENSG00000255571.8	MIR9-3HG	89361579	89424983	1	lncRNA	MIR9-3 host gene [Source:HGNC Symbol;Acc:HGNC:27388]	36.0042	-0.769069	0.3356	0.00128695	0.00777526	74	124	32	186	59	41	46	41	66.9399	95.9025	30.3263	186.832	58.8583	42.0115	48.1917	43.969	Down Regulated
ENSG00000181908	ENSG00000181908.5	LINC02724	64449074	64451657	1	lncRNA	long intergenic non-protein coding RNA 2724 [Source:HGNC Symbol;Acc:HGNC:54241]	30.0597	-0.519215	0.203184	0.00130914	0.0078719	74	127	71	70	55	44	50	42	66.9399	98.2227	67.2865	70.313	54.8679	45.0855	52.3823	45.0414	Down Regulated
ENSG00000182648	ENSG00000182648.12	RNF32-DT	156388922	156640654	-1	lncRNA	RNF32 divergent transcript [Source:HGNC Symbol;Acc:HGNC:48971]	192.903	-0.292597	0.100708	0.00135186	0.00808091	225	210	192	208	152	159	133	138	203.533	162.415	181.958	208.93	151.635	162.922	139.337	147.993	Down Regulated
ENSG00000261526	ENSG00000261526.2		1874516	1876204	-1	lncRNA	novel transcript	23.4778	-0.714855	0.310262	0.00135539	0.0080949	28	37	22	24	14	13	13	11	25.3286	28.6161	20.8493	24.1073	13.9664	13.3207	13.6194	11.7966	Down Regulated
ENSG00000260213	ENSG00000260213.6	CENPN-AS1	81016792	81035759	-1	lncRNA	CENPN antisense RNA 1 [Source:HGNC Symbol;Acc:HGNC:55106]	26.0698	0.556133	0.223909	0.00137511	0.00819095	26	28	45	47	44	49	58	54	23.5194	21.6554	42.6464	47.2102	43.8943	50.2088	60.7634	57.9104	Up Regulated
ENSG00000280378	ENSG00000280378.1		54033126	54034880	-1	lncRNA	TEC	30.4308	-0.558923	0.228935	0.00137685	0.00819894	65	58	49	47	35	28	31	24	58.7985	44.8576	46.4372	47.2102	34.9159	28.6908	32.477	25.738	Down Regulated
ENSG00000228369	ENSG00000228369.2	TXNDC12-AS1	52050918	52052683	1	lncRNA	TXNDC12 antisense RNA 1 [Source:HGNC Symbol;Acc:HGNC:30008]	16.9686	-0.692411	0.294631	0.00140212	0.00830315	46	32	30	38	16	18	17	19	41.6113	24.749	28.4309	38.1699	15.9616	18.4441	17.81	20.3759	Down Regulated
ENSG00000278916	ENSG00000278916.1	CEP83-DT	94460003	94462484	1	lncRNA	CEP83 divergent transcript [Source:HGNC Symbol;Acc:HGNC:27055]	16.3671	0.787539	0.343689	0.00141021	0.00833163	11	14	9	11	16	23	17	22	9.95052	10.8277	8.52927	11.0492	15.9616	23.5674	17.81	23.5931	Up Regulated
ENSG00000269044	ENSG00000269044.2		16633797	16635269	-1	lncRNA	novel transcript, sense intronic C19orf42	100.504	-0.372803	0.135579	0.00142436	0.00840508	93	131	139	89	72	78	74	68	84.1271	101.316	131.73	89.3979	71.8271	79.9242	77.5258	72.9242	Down Regulated
ENSG00000256315	ENSG00000256315.1	CADM1-AS1	115396756	115397658	1	lncRNA	CADM1 antisense RNA 1 [Source:HGNC Symbol;Acc:HGNC:56177]	145.041	0.387216	0.142447	0.00142653	0.00841336	106	134	209	145	179	180	185	168	95.8869	103.637	198.069	145.648	178.57	184.441	193.814	180.166	Up Regulated
ENSG00000261094	ENSG00000261094.2		122937623	122940333	1	lncRNA	novel transcript	31.2483	-0.684239	0.29036	0.0014329	0.00844849	31	46	31	34	15	15	21	17	28.0424	35.5767	29.3786	34.152	14.964	15.37	22.0006	18.2311	Down Regulated
ENSG00000259687	ENSG00000259687.1	LINC01220	75294404	75298109	1	lncRNA	long intergenic non-protein coding RNA 1220 [Source:HGNC Symbol;Acc:HGNC:49664]	56.2895	0.532983	0.213628	0.00144774	0.00852115	43	44	48	48	74	71	55	51	38.8975	34.0299	45.4895	48.2146	73.8223	72.7516	57.6205	54.6932	Up Regulated
ENSG00000285163	ENSG00000285163.1		85924984	85948824	1	lncRNA	novel transcript	60.581	-0.808982	0.366482	0.00145171	0.00853896	57	190	62	282	60	69	67	58	51.5618	146.947	58.7572	283.261	59.8559	70.7022	70.1922	62.2001	Down Regulated
ENSG00000225342	ENSG00000225342.2	LRRK2-DT	40186009	40224915	-1	lncRNA	LRRK2 divergent transcript [Source:HGNC Symbol;Acc:HGNC:40848]	13.9493	-0.933205	0.41724	0.0014688	0.00862013	15	30	16	11	10	9	4	4	13.5689	23.2022	15.1632	11.0492	9.97598	9.22203	4.19058	4.28966	Down Regulated
ENSG00000279465	ENSG00000279465.1		15731877	15732536	1	lncRNA	TEC	66.8574	0.797511	0.359706	0.00147322	0.00863362	28	29	87	78	113	92	102	99	25.3286	22.4288	82.4496	78.3488	112.729	94.2696	106.86	106.169	Up Regulated
ENSG00000275426	ENSG00000275426.1		149738	150317	1	lncRNA	novel transcript	18.6103	-0.622609	0.260645	0.00147388	0.00863495	43	41	49	45	15	21	25	30	38.8975	31.7097	46.4372	45.2012	14.964	21.5181	26.1911	32.1725	Down Regulated
ENSG00000236581	ENSG00000236581.8	STARD13-AS	33180401	33281584	1	lncRNA	STARD13 antisense RNA [Source:HGNC Symbol;Acc:HGNC:40873]	1035.18	0.430589	0.163426	0.00148563	0.00868066	1138	1162	2065	1280	1764	1740	1777	1808	1029.43	898.699	1956.99	1285.72	1759.76	1782.93	1861.67	1938.93	Up Regulated
ENSG00000267745	ENSG00000267745.1		35406684	35409768	-1	lncRNA	novel transcript	21.6114	-0.761305	0.333509	0.00149999	0.00875261	40	52	20	14	12	14	15	14	36.1837	40.2172	18.9539	14.0626	11.9712	14.3454	15.7147	15.0138	Down Regulated
ENSG00000257953	ENSG00000257953.1		57837092	57842745	1	lncRNA	novel transcript, antisense to CTDSP2	17.9477	-0.723031	0.316275	0.00152806	0.00888067	44	41	42	27	19	16	20	16	39.8021	31.7097	39.8033	27.1207	18.9544	16.3947	20.9529	17.1586	Down Regulated
ENSG00000280187	ENSG00000280187.1		69186359	69189511	-1	lncRNA	TEC	171.245	-0.328463	0.117471	0.00155032	0.00898435	197	180	179	159	117	134	112	119	178.205	139.213	169.638	159.711	116.719	137.306	117.336	127.617	Down Regulated
ENSG00000261888	ENSG00000261888.1		83104255	83106910	1	lncRNA	novel transcript	58.6771	0.712465	0.314919	0.00161507	0.00928802	20	14	24	15	41	36	21	22	18.0919	10.8277	22.7447	15.0671	40.9015	36.8881	22.0006	23.5931	Up Regulated
ENSG00000236914	ENSG00000236914.3	LINC01852	38068812	38072990	-1	lncRNA	long intergenic non-protein coding RNA 1852 [Source:HGNC Symbol;Acc:HGNC:52668]	9.96675	0.895806	0.412823	0.00165236	0.00947298	14	8	7	3	14	12	23	13	12.6643	6.18726	6.63388	3.01341	13.9664	12.296	24.0958	13.9414	Up Regulated
ENSG00000257086	ENSG00000257086.1		64246939	64249494	-1	lncRNA	novel transcript	29.2763	0.641672	0.276668	0.00165611	0.00949178	15	20	21	29	35	35	29	31	13.5689	15.4681	19.9016	29.1297	34.9159	35.8634	30.3817	33.2449	Up Regulated
ENSG00000277386	ENSG00000277386.1		33336216	33336716	-1	lncRNA	novel transcript, sense intronic to STARD13	72.7675	0.460092	0.182064	0.00175586	0.00994842	79	108	122	64	120	117	110	127	71.4628	83.528	115.619	64.2862	119.712	119.886	115.241	136.197	Up Regulated
ENSG00000259354	ENSG00000259354.5		45448427	45513767	1	lncRNA	novel transcript, antisense to SLC30A4	23.6009	1.70963	0.793013	0.00175922	0.00996465	0	4	2	0	5	7	10	3	0	3.09363	1.89539	0	4.98799	7.17269	10.4765	3.21725	Up Regulated
ENSG00000237187	ENSG00000237187.8	NR2F1-AS1	93360779	93585649	-1	lncRNA	NR2F1 antisense RNA 1 [Source:HGNC Symbol;Acc:HGNC:48622]	67.442	-0.535377	0.225741	0.00177317	0.0100299	94	77	46	58	36	31	42	41	85.0317	59.5523	43.5941	58.2593	35.9135	31.7648	44.0011	43.969	Down Regulated
ENSG00000285728	ENSG00000285728.1		42658687	42682207	-1	lncRNA	novel transcript, antisense to PPIH	129.929	-0.344084	0.126552	0.00178106	0.0100631	161	236	198	212	139	119	127	150	145.639	182.524	187.644	212.948	138.666	121.936	133.051	160.862	Down Regulated
ENSG00000270562	ENSG00000270562.1	FOXP1-DT	71584943	71587409	1	lncRNA	FOXP1 divergent transcript [Source:HGNC Symbol;Acc:HGNC:56284]	464.272	0.351611	0.130116	0.0018029	0.0101696	433	602	538	596	570	600	638	697	391.689	465.591	509.861	598.665	568.631	614.802	668.398	747.474	Up Regulated
ENSG00000226397	ENSG00000226397.8	LINC02909	24993424	25006403	-1	lncRNA	long intergenic non-protein coding RNA 2909 [Source:HGNC Symbol;Acc:HGNC:27282]	10.7223	-1.12231	0.571089	0.00180594	0.0101838	62	45	15	12	10	9	14	7	56.0848	34.8033	14.2155	12.0537	9.97598	9.22203	14.667	7.50691	Down Regulated
ENSG00000272455	ENSG00000272455.1	MRPL20-DT	1409096	1410618	1	lncRNA	MRPL20 divergent transcript [Source:HGNC Symbol;Acc:HGNC:54814]	47.771	-0.544265	0.22609	0.00181592	0.0102259	34	60	47	44	26	28	20	27	30.7562	46.4044	44.5418	44.1967	25.9376	28.6908	20.9529	28.9552	Down Regulated
ENSG00000270933	ENSG00000270933.1		25948657	25949403	-1	lncRNA	novel transcript	8.1186	-1.28924	0.623845	0.0018776	0.0105382	8	14	10	10	1	3	6	1	7.23674	10.8277	9.47697	10.0447	0.997598	3.07401	6.28587	1.07242	Down Regulated
ENSG00000273702	ENSG00000273702.1		59618553	59619714	-1	lncRNA	novel transcript	34.676	0.559118	0.236664	0.00188761	0.0105886	28	24	26	21	18	43	35	43	25.3286	18.5618	24.6401	21.0939	17.9568	44.0608	36.6676	46.1139	Up Regulated
ENSG00000224101	ENSG00000224101.1	ELMO1-AS1	36997796	37013630	1	lncRNA	ELMO1 antisense RNA 1 [Source:HGNC Symbol;Acc:HGNC:40765]	22.542	0.582667	0.247251	0.00191556	0.010704	34	40	53	36	59	51	64	60	30.7562	30.9363	50.2279	36.161	58.8583	52.2582	67.0493	64.3449	Up Regulated
ENSG00000235499	ENSG00000235499.1		73985132	73986343	1	lncRNA	novel transcript (LOC100132318)	103.564	0.427292	0.167755	0.00193801	0.0108058	115	146	103	133	174	141	141	159	104.028	112.917	97.6128	133.595	173.582	144.478	147.718	170.514	Up Regulated
ENSG00000225313	ENSG00000225313.5		33307348	33349245	1	lncRNA	novel transcript	96.1786	-0.417839	0.164467	0.00193855	0.0108058	99	136	116	118	70	67	72	80	89.5547	105.183	109.933	118.528	69.8319	68.6529	75.4305	85.7932	Down Regulated
ENSG00000261096	ENSG00000261096.1		231809846	231812352	1	lncRNA	novel transcript	10.2088	-0.902343	0.448051	0.00196629	0.0109403	23	16	36	34	11	6	11	14	20.8056	12.3745	34.1171	34.152	10.9736	6.14802	11.5241	15.0138	Down Regulated
ENSG00000233355	ENSG00000233355.7	CHRM3-AS2	239703381	239770130	-1	lncRNA	CHRM3 antisense RNA 2 [Source:HGNC Symbol;Acc:HGNC:43725]	575.43	0.51517	0.215294	0.00197383	0.0109782	430	197	535	237	585	461	430	452	388.975	152.361	507.018	238.06	583.595	472.373	450.488	484.732	Up Regulated
ENSG00000278897	ENSG00000278897.1		11856032	11858302	1	lncRNA	TEC	87.0108	-0.361043	0.138207	0.00198069	0.0110103	200	300	150	168	119	125	130	149	180.919	232.022	142.155	168.751	118.714	128.084	136.194	159.79	Down Regulated
ENSG00000232878	ENSG00000232878.3	DPYD-AS1	97095923	97322955	1	lncRNA	DPYD antisense RNA 1 [Source:HGNC Symbol;Acc:HGNC:40195]	311.423	0.446031	0.179371	0.0020548	0.0113324	291	287	459	386	437	444	443	501	263.237	221.968	434.993	387.726	435.95	454.953	464.107	537.28	Up Regulated
ENSG00000259488	ENSG00000259488.2	DUT-AS1	48312353	48331856	-1	lncRNA	DUT antisense RNA 1 [Source:HGNC Symbol;Acc:HGNC:55420]	77.5165	-0.368582	0.140493	0.00205962	0.0113559	153	230	121	189	110	99	123	114	138.403	177.884	114.671	189.845	109.736	101.442	128.86	122.255	Down Regulated
ENSG00000281103	ENSG00000281103.1	TRG-AS1	38330978	38378804	1	lncRNA	T cell receptor gamma locus antisense RNA 1 [Source:HGNC Symbol;Acc:HGNC:48974]	197.265	-0.362522	0.141507	0.00206705	0.011389	180	202	153	140	122	100	109	103	162.827	156.228	144.998	140.626	121.707	102.467	114.193	110.459	Down Regulated
ENSG00000259883	ENSG00000259883.1	EHD4-AS1	41921417	41929286	1	lncRNA	EHD4 antisense RNA 1 [Source:HGNC Symbol;Acc:HGNC:51418]	60.9679	0.489136	0.201918	0.00207043	0.0114	89	89	67	37	122	79	88	79	80.5088	68.8332	63.4957	37.1654	121.707	80.9489	92.1928	84.7208	Up Regulated
ENSG00000257258	ENSG00000257258.1		29142969	29158537	-1	lncRNA	novel transcript	379.283	-0.458278	0.186613	0.00208486	0.0114577	610	642	452	841	391	380	344	412	551.802	496.527	428.359	844.76	390.061	389.374	360.39	441.835	Down Regulated
ENSG00000233237	ENSG00000233237.7	LINC00472	71343427	71420745	-1	lncRNA	long intergenic non-protein coding RNA 472 [Source:HGNC Symbol;Acc:HGNC:21380]	231.465	-0.615529	0.275171	0.00209399	0.011496	102	65	33	136	42	55	37	40	92.2685	50.2715	31.274	136.608	41.8991	56.3568	38.7629	42.8966	Down Regulated
ENSG00000278992	ENSG00000278992.1		76270206	76270800	1	lncRNA	TEC	8.38787	0.710597	0.33065	0.00210351	0.0115366	9	14	25	23	32	32	23	31	8.14134	10.8277	23.6924	23.1028	31.9231	32.7894	24.0958	33.2449	Up Regulated
ENSG00000224844	ENSG00000224844.1		237122910	237124097	-1	lncRNA	novel transcript	17.0618	0.639931	0.290425	0.00218424	0.0119072	16	11	24	19	25	24	33	26	14.4735	8.50748	22.7447	19.085	24.94	24.5921	34.5723	27.8828	Up Regulated
ENSG00000253968	ENSG00000253968.1		173383941	173451591	1	lncRNA	novel transcript	70.3642	-0.565454	0.246683	0.00219559	0.0119499	54	39	29	64	25	28	19	28	48.848	30.1629	27.4832	64.2862	24.94	28.6908	19.9053	30.0276	Down Regulated
ENSG00000231613	ENSG00000231613.1		89788914	89790492	1	lncRNA	novel transcript	14.6053	0.811393	0.391282	0.00219926	0.0119666	6	8	15	6	19	16	19	10	5.42756	6.18726	14.2155	6.02683	18.9544	16.3947	19.9053	10.7242	Up Regulated
ENSG00000260188	ENSG00000260188.1		110477907	110479436	1	lncRNA	novel transcript, antisense to SLC22A16	301.094	-0.318983	0.118488	0.00220221	0.0119698	464	712	423	561	357	366	367	364	419.731	550.666	400.876	563.508	356.143	375.029	384.486	390.359	Down Regulated
ENSG00000273344	ENSG00000273344.1	PAXIP1-DT	155003421	155005703	1	lncRNA	PAXIP1 divergent transcript [Source:HGNC Symbol;Acc:HGNC:27328]	67.3849	-0.427535	0.171287	0.0022327	0.0121161	68	72	77	55	30	45	51	40	61.5123	55.6853	72.9727	55.2459	29.9279	46.1101	53.4299	42.8966	Down Regulated
ENSG00000286092	ENSG00000286092.1		123713408	123723169	-1	lncRNA	novel transcript, antisense to ATP6V0A2	18.5578	-0.79987	0.398709	0.00225756	0.0122379	30	34	26	33	13	11	12	15	27.1378	26.2958	24.6401	33.1476	12.9688	11.2714	12.5717	16.0862	Down Regulated
ENSG00000152931	ENSG00000152931.7	PART1	60487713	60548813	1	lncRNA	prostate androgen-regulated transcript 1 [Source:HGNC Symbol;Acc:HGNC:17263]	111.072	0.545148	0.238663	0.00228927	0.0123604	57	49	86	80	90	88	103	105	51.5618	37.8969	81.5019	80.3577	89.7838	90.1709	107.907	112.604	Up Regulated
ENSG00000230115	ENSG00000230115.1	TPRG1-AS2	189238686	189240594	-1	lncRNA	TPRG1 antisense RNA 2 [Source:HGNC Symbol;Acc:HGNC:41062]	52.4977	0.564746	0.250421	0.00232315	0.0125167	30	19	56	23	41	43	46	54	27.1378	14.6947	53.071	23.1028	40.9015	44.0608	48.1917	57.9104	Up Regulated
ENSG00000235538	ENSG00000235538.1		163671577	163798849	1	lncRNA	novel transcript	24.3732	-0.745993	0.36506	0.00232508	0.0125237	30	54	23	115	18	30	29	23	27.1378	41.764	21.797	115.514	17.9568	30.7401	30.3817	24.6656	Down Regulated
ENSG00000228741	ENSG00000228741.2	SPATA13	23979810	24035027	1	lncRNA	spermatogenesis associated 13 [Source:NCBI gene (formerly Entrezgene);Acc:221178]	22.2143	0.98514	0.513289	0.00233318	0.0125537	8	0	23	29	30	38	39	30	7.23674	0	21.797	29.1297	29.9279	38.9374	40.8582	32.1725	Up Regulated
ENSG00000237637	ENSG00000237637.1	FRY-AS1	32025314	32031639	-1	lncRNA	FRY antisense RNA 1 [Source:HGNC Symbol;Acc:HGNC:39725]	37.5054	-0.501438	0.213807	0.00235272	0.0126224	72	110	78	87	43	55	48	50	65.1307	85.0748	73.9204	87.389	42.8967	56.3568	50.287	53.6208	Down Regulated
ENSG00000277978	ENSG00000277978.1		66565620	66566001	-1	lncRNA	novel transcript, antisense to CKLF	17.6397	-0.898115	0.432456	0.00239128	0.0127887	14	11	17	22	6	6	6	7	12.6643	8.50748	16.1108	22.0984	5.98559	6.14802	6.28587	7.50691	Down Regulated
ENSG00000267169	ENSG00000267169.1	ADGRL1-AS1	14137146	14171267	1	lncRNA	ADGRL1 antisense RNA 1 [Source:HGNC Symbol;Acc:HGNC:55309]	156.137	0.404678	0.161508	0.00240222	0.0128304	163	277	153	121	260	215	183	195	147.449	214.234	144.998	121.541	259.376	220.304	191.719	209.121	Up Regulated
ENSG00000258658	ENSG00000258658.1	TOMM20L-DT	58370023	58395641	-1	lncRNA	TOMM20L divergent transcript [Source:HGNC Symbol;Acc:HGNC:55443]	18.1816	0.716717	0.339984	0.00241108	0.0128675	13	22	27	17	34	36	39	22	11.7597	17.015	25.5878	17.076	33.9183	36.8881	40.8582	23.5931	Up Regulated
ENSG00000229955	ENSG00000229955.1		38387918	38388857	-1	lncRNA	novel transcript, sense intronic to CSNK1E	18.9883	-0.639893	0.297542	0.00245352	0.0130324	35	51	36	45	27	9	22	24	31.6608	39.4438	34.1171	45.2012	26.9352	9.22203	23.0482	25.738	Down Regulated
ENSG00000280543	ENSG00000280543.1	ASAP1-IT2	130082738	130084768	-1	lncRNA	ASAP1 intronic transcript 2 [Source:HGNC Symbol;Acc:HGNC:48917]	110.468	0.448881	0.186532	0.00247645	0.0131336	83	91	124	128	147	121	120	160	75.0812	70.38	117.514	128.572	146.647	123.985	125.717	171.586	Up Regulated
ENSG00000266258	ENSG00000266258.1	LINC01909	70335439	70352459	1	lncRNA	long intergenic non-protein coding RNA 1909 [Source:HGNC Symbol;Acc:HGNC:52728]	38.1791	-0.528629	0.233761	0.00252155	0.0133275	56	97	76	28	42	35	39	23	50.6572	75.0205	72.025	28.1252	41.8991	35.8634	40.8582	24.6656	Down Regulated
ENSG00000273487	ENSG00000273487.1		92189237	92190707	1	lncRNA	novel transcript	13.481	-0.753966	0.368584	0.00252829	0.0133562	27	25	18	28	17	11	6	9	24.424	19.3352	17.0585	28.1252	16.9592	11.2714	6.28587	9.65174	Down Regulated
ENSG00000230806	ENSG00000230806.1	SRGAP2-AS1	121360156	121398806	-1	lncRNA	SRGAP2 antisense RNA 1 [Source:HGNC Symbol;Acc:HGNC:40902]	49.8746	0.468227	0.197298	0.00255707	0.0134802	80	103	100	92	109	121	106	149	72.3674	79.6609	94.7697	92.4114	108.738	123.985	111.05	159.79	Up Regulated
ENSG00000283355	ENSG00000283355.1		184014035	184016382	1	lncRNA	TEC	34.2817	0.685105	0.333507	0.00258088	0.0135846	13	15	40	43	43	52	46	44	11.7597	11.6011	37.9079	43.1923	42.8967	53.2828	48.1917	47.1863	Up Regulated
ENSG00000231711	ENSG00000231711.2	LINC00899	46039907	46044853	-1	lncRNA	long intergenic non-protein coding RNA 899 [Source:HGNC Symbol;Acc:HGNC:48583]	181.181	-0.442773	0.184654	0.00260256	0.0136809	408	544	305	233	248	211	221	197	369.074	420.733	289.048	234.042	247.404	216.205	231.53	211.266	Down Regulated
ENSG00000240449	ENSG00000240449.1	REPIN1-AS1	150363777	150372590	-1	lncRNA	REPIN1 antisense RNA 1 [Source:HGNC Symbol;Acc:HGNC:41201]	56.9331	0.602849	0.279556	0.00260398	0.0136849	35	33	40	31	41	50	50	66	31.6608	25.5224	37.9079	31.1386	40.9015	51.2335	52.3823	70.7794	Up Regulated
ENSG00000251867	ENSG00000251867.4		80484561	80486699	-1	lncRNA	novel transcript, antisense to ZBTB10	31.915	0.692511	0.334456	0.00264024	0.0138382	12	25	8	15	22	25	27	23	10.8551	19.3352	7.58158	15.0671	21.9472	25.6167	28.2864	24.6656	Up Regulated
ENSG00000274979	ENSG00000274979.1		69326574	69331882	-1	lncRNA	novel transcript	14.2276	0.755773	0.377462	0.00267731	0.013987	15	24	41	18	52	34	22	63	13.5689	18.5618	38.8556	18.0805	51.8751	34.8388	23.0482	67.5622	Up Regulated
ENSG00000203865	ENSG00000203865.9	ATP1A1-AS1	116378437	116421301	-1	lncRNA	ATP1A1 antisense RNA 1 [Source:HGNC Symbol;Acc:HGNC:28262]	134.212	0.292749	0.109546	0.00272991	0.0142252	119	169	146	114	143	157	159	139	107.647	130.706	138.364	114.51	142.657	160.873	166.576	149.066	Up Regulated
ENSG00000238287	ENSG00000238287.1	EXO5-DT	40493157	40508661	-1	lncRNA	EXO5 divergent transcript [Source:HGNC Symbol;Acc:HGNC:55647]	274.313	-0.306458	0.116068	0.00273865	0.0142561	338	469	354	422	272	247	275	288	305.752	362.728	335.485	423.887	271.347	253.093	288.102	308.856	Down Regulated
ENSG00000231663	ENSG00000231663.1	COA6-AS1	234372807	234373664	-1	lncRNA	COA6 antisense RNA 1 [Source:HGNC Symbol;Acc:HGNC:40825]	29.8063	-0.566429	0.25547	0.00278025	0.0144209	48	49	28	34	25	22	19	18	43.4205	37.8969	26.5355	34.152	24.94	22.5427	19.9053	19.3035	Down Regulated
ENSG00000238099	ENSG00000238099.2	LINC01625	139435636	139474658	-1	lncRNA	long intergenic non-protein coding RNA 1625 [Source:HGNC Symbol;Acc:HGNC:52052]	24.1578	-0.68785	0.342189	0.0028644	0.0147707	77	87	42	36	29	32	20	29	69.6537	67.2864	39.8033	36.161	28.9303	32.7894	20.9529	31.1	Down Regulated
ENSG00000283538	ENSG00000283538.2		62910021	62968549	-1	lncRNA	novel transcript	17.6404	-0.680531	0.351998	0.00289611	0.0148926	24	24	26	33	10	9	19	11	21.7102	18.5618	24.6401	33.1476	9.97598	9.22203	19.9053	11.7966	Down Regulated
ENSG00000237484	ENSG00000237484.5	LINC01684	24306939	24547942	1	lncRNA	long intergenic non-protein coding RNA 1684 [Source:HGNC Symbol;Acc:HGNC:52472]	366.187	-0.271154	0.10071	0.00293866	0.0150733	388	438	382	456	290	332	279	280	350.982	338.752	362.02	458.039	289.303	340.19	292.293	300.276	Down Regulated
ENSG00000281649	ENSG00000281649.1	EBLN3P	37079645	37090928	1	lncRNA	endogenous Bornavirus like nucleoprotein 3, pseudogene [Source:HGNC Symbol;Acc:HGNC:50682]	2181.26	-0.212234	0.075986	0.00296064	0.0151592	2090	2658	1917	1919	1571	1564	1571	1632	1890.6	2055.72	1816.74	1927.58	1567.23	1602.58	1645.85	1750.18	Down Regulated
ENSG00000266456	ENSG00000266456.1		650229	652843	1	lncRNA	novel transcript, antisense to C18orf56	18.4057	-0.517962	0.232128	0.00296264	0.0151641	51	71	42	45	33	24	30	28	46.1342	54.9119	39.8033	45.2012	32.9207	24.5921	31.4294	30.0276	Down Regulated
ENSG00000272240	ENSG00000272240.1		234347	234887	-1	lncRNA	novel transcript, antisense to ZNF596	33.2698	-0.562247	0.25759	0.00296383	0.0151641	38	50	27	24	17	19	12	25	34.3745	38.6703	25.5878	24.1073	16.9592	19.4687	12.5717	26.8104	Down Regulated
ENSG00000235478	ENSG00000235478.4	LINC01664	17121530	17132105	1	lncRNA	long intergenic non-protein coding RNA 1664 [Source:HGNC Symbol;Acc:HGNC:52452]	35.1204	-0.587777	0.279498	0.0029778	0.015224	46	53	22	60	29	16	34	14	41.6113	40.9906	20.8493	60.2683	28.9303	16.3947	35.6199	15.0138	Down Regulated
ENSG00000243179	ENSG00000243179.1		113979909	113983258	1	lncRNA	novel transcript	81.6338	0.402526	0.165994	0.0029837	0.0152504	96	113	93	62	113	112	113	102	86.8409	87.395	88.1358	62.2772	112.729	114.763	118.384	109.386	Up Regulated
ENSG00000234684	ENSG00000234684.6	SDCBP2-AS1	1325400	1378735	1	lncRNA	SDCBP2 antisense RNA 1 [Source:HGNC Symbol;Acc:HGNC:44314]	126.851	-0.284323	0.107002	0.00298656	0.0152612	192	189	146	159	139	113	94	132	173.682	146.174	138.364	159.711	138.666	115.788	98.4787	141.559	Down Regulated
ENSG00000280070	ENSG00000280070.1		96992864	96996601	1	lncRNA	TEC	11.1287	-0.902116	0.496386	0.00300109	0.0153068	18	13	9	45	9	6	6	11	16.2827	10.0543	8.52927	45.2012	8.97838	6.14802	6.28587	11.7966	Down Regulated
ENSG00000236065	ENSG00000236065.2		32987075	33032469	1	lncRNA	novel transcript	25.4066	-0.609383	0.297637	0.00303917	0.0154716	39	78	44	92	41	24	26	36	35.2791	60.3257	41.6987	92.4114	40.9015	24.5921	27.2388	38.607	Down Regulated
ENSG00000233695	ENSG00000233695.2	GAS6-AS1	113815630	113845744	1	lncRNA	GAS6 antisense RNA 1 [Source:HGNC Symbol;Acc:HGNC:39826]	326.326	0.470774	0.20564	0.00304488	0.015489	479	729	568	470	795	619	584	903	433.3	563.814	538.292	472.102	793.091	634.271	611.825	968.391	Up Regulated
ENSG00000234478	ENSG00000234478.1	ACBD3-AS1	226148003	226155071	1	lncRNA	ACBD3 antisense RNA 1 [Source:HGNC Symbol;Acc:HGNC:40701]	19.2639	-0.666493	0.325332	0.00306152	0.0155542	26	25	24	20	11	13	10	11	23.5194	19.3352	22.7447	20.0894	10.9736	13.3207	10.4765	11.7966	Down Regulated
ENSG00000214353	ENSG00000214353.7	VAC14-AS1	70755035	70773251	1	lncRNA	VAC14 antisense RNA 1 [Source:HGNC Symbol;Acc:HGNC:48605]	112.727	0.374372	0.16028	0.00306641	0.0155702	53	71	83	72	103	70	63	101	47.9434	54.9119	78.6588	72.3219	102.753	71.7269	66.0017	108.314	Up Regulated
ENSG00000260774	ENSG00000260774.1		213898	217279	-1	lncRNA	novel transcript	15.8339	-0.664136	0.329293	0.00311059	0.0157483	24	56	32	35	23	14	10	22	21.7102	43.3108	30.3263	35.1565	22.9448	14.3454	10.4765	23.5931	Down Regulated
ENSG00000267940	ENSG00000267940.1		6201901	6203253	-1	lncRNA	novel transcript	15.156	-0.7289	0.377475	0.00314798	0.0158933	27	22	18	47	7	17	17	10	24.424	17.015	17.0585	47.2102	6.98319	17.4194	17.81	10.7242	Down Regulated
ENSG00000258455	ENSG00000258455.1		55325834	55339501	-1	lncRNA	novel transcript	21.5519	0.640347	0.318031	0.00319927	0.016097	26	20	44	35	47	35	52	64	23.5194	15.4681	41.6987	35.1565	46.8871	35.8634	54.4776	68.6346	Up Regulated
ENSG00000279356	ENSG00000279356.1		50072862	50074986	1	lncRNA	novel transcript	30.3947	-0.645159	0.322708	0.00324582	0.016303	37	52	48	48	18	20	18	33	33.4699	40.2172	45.4895	48.2146	17.9568	20.4934	18.8576	35.3897	Down Regulated
ENSG00000277534	ENSG00000277534.1		26542971	26545791	-1	lncRNA	novel transcript, sense intronic to KCTD1	47.1919	-0.49283	0.220499	0.00326216	0.0163663	63	68	47	30	29	30	28	30	56.9894	52.5917	44.5418	30.1341	28.9303	30.7401	29.3341	32.1725	Down Regulated
ENSG00000250790	ENSG00000250790.4		132911470	132914732	1	lncRNA	novel transcript	25.5157	-0.517317	0.236649	0.00330909	0.016571	51	30	40	46	26	27	25	15	46.1342	23.2022	37.9079	46.2057	25.9376	27.6661	26.1911	16.0862	Down Regulated
ENSG00000248202	ENSG00000248202.1	LINC02234	97840912	97923497	1	lncRNA	long intergenic non-protein coding RNA 2234 [Source:HGNC Symbol;Acc:HGNC:53105]	16.1012	-0.887178	0.4963	0.00333374	0.0166703	25	18	14	9	3	5	6	10	22.6148	13.9213	13.2678	9.04024	2.99279	5.12335	6.28587	10.7242	Down Regulated
ENSG00000227627	ENSG00000227627.2		152983331	152991322	1	lncRNA	novel transcript	32.7182	-0.423707	0.180412	0.00334837	0.0167229	83	107	62	59	58	42	45	43	75.0812	82.7545	58.7572	59.2638	57.8607	43.0361	47.144	46.1139	Down Regulated
ENSG00000250102	ENSG00000250102.5	LINC02377	131379717	131591825	1	lncRNA	long intergenic non-protein coding RNA 2377 [Source:HGNC Symbol;Acc:HGNC:53300]	84.8126	-0.399683	0.168029	0.00337841	0.0168432	117	118	100	91	59	67	74	65	105.837	91.262	94.7697	91.4069	58.8583	68.6529	77.5258	69.707	Down Regulated
ENSG00000229431	ENSG00000229431.1	MED8-AS1	43385113	43389155	1	lncRNA	MED8 antisense RNA 1 [Source:HGNC Symbol;Acc:HGNC:40908]	56.3399	-0.493579	0.223635	0.00339081	0.0168892	40	91	75	67	39	39	42	34	36.1837	70.38	71.0773	67.2996	38.9063	39.9621	44.0011	36.4621	Down Regulated
ENSG00000247828	ENSG00000247828.7	TMEM161B-DT	88268864	88439337	1	lncRNA	TMEM161B divergent transcript [Source:HGNC Symbol;Acc:HGNC:43839]	596.362	-0.263895	0.0997723	0.00343253	0.0170569	712	849	815	998	562	539	656	657	644.07	656.623	772.373	1002.46	560.65	552.297	687.255	704.577	Down Regulated
ENSG00000229647	ENSG00000229647.1	MYOSLID	207166120	207248668	1	lncRNA	myocardin-induced smooth muscle lncRNA, inducer of differentiation [Source:HGNC Symbol;Acc:HGNC:51821]	36.2696	-0.724436	0.379796	0.003552	0.0175117	34	20	8	26	13	15	8	3	30.7562	15.4681	7.58158	26.1163	12.9688	15.37	8.38116	3.21725	Down Regulated
ENSG00000227908	ENSG00000227908.3	IL6ST-DT	55995153	56003649	1	lncRNA	IL6ST divergent transcript [Source:HGNC Symbol;Acc:HGNC:55804]	14.9036	0.872817	0.495638	0.00357134	0.01759	8	7	6	7	13	17	16	11	7.23674	5.41385	5.68618	7.0313	12.9688	17.4194	16.7623	11.7966	Up Regulated
ENSG00000247400	ENSG00000247400.3	DNAJC3-DT	95648711	95676973	-1	lncRNA	DNAJC3 divergent transcript [Source:HGNC Symbol;Acc:HGNC:39808]	100.072	-0.379456	0.15839	0.00360161	0.0177176	96	128	76	113	68	70	59	65	86.8409	98.9961	72.025	113.505	67.8367	71.7269	61.8111	69.707	Down Regulated
ENSG00000227630	ENSG00000227630.3	LINC01132	234724042	234736720	1	lncRNA	long intergenic non-protein coding RNA 1132 [Source:HGNC Symbol;Acc:HGNC:49444]	35.9113	0.586305	0.288232	0.00360824	0.0177373	39	34	20	17	39	54	38	31	35.2791	26.2958	18.9539	17.076	38.9063	55.3322	39.8105	33.2449	Up Regulated
ENSG00000286059	ENSG00000286059.1		233977872	233980018	-1	lncRNA	novel transcript, antisense to TRPM8	57.4851	0.651416	0.337112	0.00364707	0.0178806	11	12	27	14	28	26	21	28	9.95052	9.28088	25.5878	14.0626	27.9328	26.6414	22.0006	30.0276	Up Regulated
ENSG00000224418	ENSG00000224418.1	STK24-AS1	98577244	98578830	1	lncRNA	STK24 antisense RNA 1 [Source:HGNC Symbol;Acc:HGNC:39935]	32.713	0.543859	0.261002	0.00371138	0.0181608	18	32	33	25	34	46	37	36	16.2827	24.749	31.274	25.1118	33.9183	47.1348	38.7629	38.607	Up Regulated
ENSG00000225092	ENSG00000225092.2		7183083	7185287	1	lncRNA	novel transcript	133.182	0.378608	0.158948	0.0037243	0.0182196	214	236	263	191	280	234	249	316	193.583	182.524	249.244	191.854	279.328	239.773	260.864	338.883	Up Regulated
ENSG00000248206	ENSG00000248206.1		183987669	183996680	1	lncRNA	novel transcript	66.4636	0.44039	0.195339	0.00376181	0.018381	66	52	43	51	77	65	63	65	59.7031	40.2172	40.751	51.228	76.8151	66.6035	66.0017	69.707	Up Regulated
ENSG00000254166	ENSG00000254166.2	CASC19	127072694	127227541	-1	lncRNA	cancer susceptibility 19 [Source:HGNC Symbol;Acc:HGNC:49476]	53.6733	0.454296	0.204483	0.00379938	0.0185297	66	66	115	75	106	112	100	102	59.7031	51.0449	108.985	75.3353	105.745	114.763	104.765	109.386	Up Regulated
ENSG00000263370	ENSG00000263370.1		29639627	29640825	1	lncRNA	novel transcript, antisense to SSH2	17.5027	0.586562	0.292845	0.00379954	0.0185297	8	28	36	28	31	28	47	43	7.23674	21.6554	34.1171	28.1252	30.9255	28.6908	49.2393	46.1139	Up Regulated
ENSG00000228067	ENSG00000228067.1	LINC01740	212545694	212556065	1	lncRNA	long intergenic non-protein coding RNA 1740 [Source:HGNC Symbol;Acc:HGNC:52528]	20.0215	0.830466	0.471429	0.00380825	0.0185544	9	4	10	4	16	16	11	10	8.14134	3.09363	9.47697	4.01789	15.9616	16.3947	11.5241	10.7242	Up Regulated
ENSG00000254676	ENSG00000254676.1		83180144	83184520	1	lncRNA	novel transcript, sense overlapping PCF11	57.4078	0.390651	0.165837	0.00387694	0.0188258	58	64	59	29	62	53	74	63	52.4664	49.498	55.9141	29.1297	61.8511	54.3075	77.5258	67.5622	Up Regulated
ENSG00000278467	ENSG00000278467.1		223994262	223995196	1	lncRNA	novel transcript	59.6249	-0.443555	0.198634	0.00389281	0.0188848	68	69	69	84	31	47	41	54	61.5123	53.3651	65.3911	84.3756	30.9255	48.1595	42.9535	57.9104	Down Regulated
ENSG00000260920	ENSG00000260920.2		40464319	40466767	1	lncRNA	novel transcript, sense overlapping with ZNF643	1154.63	-0.26906	0.103899	0.00391201	0.0189689	793	1054	755	1200	716	623	657	706	717.342	815.171	715.511	1205.37	714.28	638.369	688.303	757.125	Down Regulated
ENSG00000279667	ENSG00000279667.1		40473055	40474059	1	lncRNA	TEC	169.152	-0.378744	0.158466	0.00396681	0.0191888	179	251	147	320	127	142	159	148	161.922	194.125	139.311	321.431	126.695	145.503	166.576	158.717	Down Regulated
ENSG00000233912	ENSG00000233912.1		5156905	5187329	-1	lncRNA	novel transcript, antisense to ARL8B	67.2657	0.455245	0.206924	0.00396818	0.0191909	60	96	117	118	122	117	114	157	54.2756	74.2471	110.881	118.528	121.707	119.886	119.432	168.369	Up Regulated
ENSG00000237753	ENSG00000237753.1	SLC20A1-DT	112641832	112645720	-1	lncRNA	SLC20A1 divergent transcript [Source:HGNC Symbol;Acc:HGNC:55651]	93.1018	-0.374229	0.164011	0.00399302	0.0192972	129	113	66	104	77	63	69	51	116.692	87.395	62.548	104.465	76.8151	64.5542	72.2875	54.6932	Down Regulated
ENSG00000238045	ENSG00000238045.9	MVP-DT	29808636	29821252	-1	lncRNA	MVP divergent transcript [Source:HGNC Symbol;Acc:HGNC:56029]	29.6753	-0.571445	0.285792	0.00401037	0.0193673	37	54	48	59	36	25	18	24	33.4699	41.764	45.4895	59.2638	35.9135	25.6167	18.8576	25.738	Down Regulated
ENSG00000272720	ENSG00000272720.1		38090127	38091559	1	lncRNA	novel transcript, antisense to BAIAP2L2	117.372	0.325131	0.132188	0.00407983	0.0196327	135	136	121	106	167	129	132	136	122.12	105.183	114.671	106.474	166.599	132.182	138.289	145.848	Up Regulated
ENSG00000249852	ENSG00000249852.1		227554	229557	-1	lncRNA	TEC	117.522	0.491837	0.232053	0.00410067	0.0197096	111	155	131	78	181	128	130	193	100.41	119.878	124.148	78.3488	180.565	131.158	136.194	206.976	Up Regulated
ENSG00000250033	ENSG00000250033.5	SLC7A11-AS1	138057464	138178177	1	lncRNA	SLC7A11 antisense RNA 1 [Source:HGNC Symbol;Acc:HGNC:44064]	208.171	0.565201	0.285154	0.00416022	0.0199161	116	145	181	65	168	172	163	231	104.933	112.144	171.533	65.2906	167.597	176.243	170.766	247.728	Up Regulated
ENSG00000279570	ENSG00000279570.1		78691266	78691979	-1	lncRNA	TEC	51.0778	0.472702	0.211936	0.00425084	0.0202541	43	50	65	83	73	79	71	94	38.8975	38.6703	61.6003	83.3711	72.8247	80.9489	74.3828	100.807	Up Regulated
ENSG00000281392	ENSG00000281392.1	LINC00506	87089129	87158363	1	lncRNA	long intergenic non-protein coding RNA 506 [Source:NCBI gene (formerly Entrezgene);Acc:100846978]	29.8561	-0.486453	0.229864	0.00426011	0.0202697	72	85	47	56	34	35	51	26	65.1307	65.7396	44.5418	56.2504	33.9183	35.8634	53.4299	27.8828	Down Regulated
ENSG00000212978	ENSG00000212978.6	C2orf74-DT	61141592	61144969	-1	lncRNA	C2orf74 divergent transcript [Source:HGNC Symbol;Acc:HGNC:27941]	423.427	-0.241217	0.0923138	0.00432247	0.0205135	675	694	438	364	408	416	390	340	610.6	536.744	415.091	365.628	407.02	426.263	408.582	364.621	Down Regulated
ENSG00000248138	ENSG00000248138.5		16400430	16512187	1	lncRNA	novel transcript	22.6661	-0.606876	0.317405	0.00437984	0.0207567	22	23	28	45	14	15	16	14	19.901	17.7884	26.5355	45.2012	13.9664	15.37	16.7623	15.0138	Down Regulated
ENSG00000234199	ENSG00000234199.2	LINC01191	113970719	114007304	1	lncRNA	long intergenic non-protein coding RNA 1191 [Source:HGNC Symbol;Acc:HGNC:49595]	33.495	0.540022	0.268723	0.00439162	0.020798	27	27	23	15	18	32	40	40	24.424	20.882	21.797	15.0671	17.9568	32.7894	41.9058	42.8966	Up Regulated
ENSG00000223552	ENSG00000223552.1	CCR5AS	46364391	46407117	-1	lncRNA	CCR5 antisense RNA [Source:HGNC Symbol;Acc:HGNC:54398]	36.4556	0.506886	0.244813	0.00439807	0.0208188	35	54	41	18	38	57	53	52	31.6608	41.764	38.8556	18.0805	37.9087	58.4062	55.5252	55.7656	Up Regulated
ENSG00000258725	ENSG00000258725.1	PRC1-AS1	90966340	90988625	1	lncRNA	PRC1 antisense RNA 1 [Source:HGNC Symbol;Acc:HGNC:48587]	35.5026	0.397986	0.174751	0.00441371	0.0208685	71	76	52	49	83	64	77	77	64.2261	58.7789	49.2802	49.2191	82.8007	65.5789	80.6687	82.576	Up Regulated
ENSG00000271933	ENSG00000271933.1		84138420	84140582	-1	lncRNA	novel transcript, antisense to GHITM	67.8967	0.358328	0.152367	0.00444363	0.0209661	79	86	95	105	102	107	93	128	71.4628	66.513	90.0312	105.469	101.755	109.64	97.431	137.269	Up Regulated
ENSG00000237520	ENSG00000237520.1	LINC02971	234957231	234960022	1	lncRNA	long intergenic non-protein coding RNA 2971 [Source:HGNC Symbol;Acc:HGNC:56012]	13.8073	-0.752568	0.452813	0.00449533	0.0211496	23	39	17	80	17	12	25	13	20.8056	30.1629	16.1108	80.3577	16.9592	12.296	26.1911	13.9414	Down Regulated
ENSG00000258667	ENSG00000258667.1	HIF1A-AS3	61707298	61751163	-1	lncRNA	HIF1A antisense RNA 3 [Source:HGNC Symbol;Acc:HGNC:54284]	46.271	0.596237	0.317099	0.00457666	0.0214505	32	54	74	60	59	81	95	102	28.947	41.764	70.1296	60.2683	58.8583	82.9982	99.5263	109.386	Up Regulated
ENSG00000179406	ENSG00000179406.7	LINC00174	66376044	66493566	-1	lncRNA	long intergenic non-protein coding RNA 174 [Source:HGNC Symbol;Acc:HGNC:27788]	353.335	0.255301	0.0995709	0.00457798	0.0214505	448	521	518	411	486	490	494	544	405.258	402.945	490.907	412.838	484.833	502.088	517.537	583.394	Up Regulated
ENSG00000261270	ENSG00000261270.1		56940278	56941342	1	lncRNA	novel transcript, sense intronic to HERPUD1	37.4552	-0.480252	0.228207	0.00458425	0.0214735	43	53	35	42	23	21	23	31	38.8975	40.9906	33.1694	42.1878	22.9448	21.5181	24.0958	33.2449	Down Regulated
ENSG00000271797	ENSG00000271797.1		115262505	115263448	1	lncRNA	novel transcript, antisense to PGGT1B	34.9207	-0.513359	0.251372	0.00459571	0.0215187	63	56	41	22	27	33	23	16	56.9894	43.3108	38.8556	22.0984	26.9352	33.8141	24.0958	17.1586	Down Regulated
ENSG00000273472	ENSG00000273472.1		140756410	140757927	1	lncRNA	novel transcript	45.4456	0.532423	0.266563	0.00461111	0.0215698	43	31	36	11	59	45	42	25	38.8975	23.9756	34.1171	11.0492	58.8583	46.1101	44.0011	26.8104	Up Regulated
ENSG00000240888	ENSG00000240888.1		143313067	143314429	-1	lncRNA	novel transcript	16.9437	0.727753	0.422179	0.00461488	0.0215736	7	5	22	3	14	16	18	18	6.33215	3.86703	20.8493	3.01341	13.9664	16.3947	18.8576	19.3035	Up Regulated
ENSG00000232973	ENSG00000232973.12	CYP1B1-AS1	38073447	38231651	1	lncRNA	CYP1B1 antisense RNA 1 [Source:HGNC Symbol;Acc:HGNC:28543]	51.7052	0.583901	0.305973	0.00464182	0.0216725	22	21	27	7	23	30	34	28	19.901	16.2415	25.5878	7.0313	22.9448	30.7401	35.6199	30.0276	Up Regulated
ENSG00000273058	ENSG00000273058.2		236536162	236536704	-1	lncRNA	novel transcript	66.1352	-0.407014	0.182451	0.00464243	0.0216725	82	106	74	116	63	52	55	63	74.1766	81.9811	70.1296	116.519	62.8487	53.2828	57.6205	67.5622	Down Regulated
ENSG00000224429	ENSG00000224429.7	LINC00539	21302862	21362139	-1	lncRNA	long intergenic non-protein coding RNA 539 [Source:HGNC Symbol;Acc:HGNC:43672]	29.0713	-0.542149	0.27609	0.00469425	0.0218792	36	34	46	63	21	24	19	32	32.5653	26.2958	43.5941	63.2817	20.9496	24.5921	19.9053	34.3173	Down Regulated
ENSG00000253269	ENSG00000253269.1		169772966	169779365	-1	lncRNA	novel transcript	42.1233	0.477701	0.226806	0.00480331	0.0222751	34	48	45	56	68	66	55	55	30.7562	37.1235	42.6464	56.2504	67.8367	67.6282	57.6205	58.9828	Up Regulated
ENSG00000285865	ENSG00000285865.1		179974584	179980186	1	lncRNA	Novel transcript, antisense to RNF130	89.0582	0.407595	0.18634	0.00487951	0.0225782	70	85	132	88	128	116	100	125	63.3215	65.7396	125.096	88.3935	127.693	118.862	104.765	134.052	Up Regulated
ENSG00000223504	ENSG00000223504.1		68055351	68060502	1	lncRNA	novel transcript	19.6123	-0.518704	0.261981	0.00489581	0.0226369	58	53	43	70	19	29	40	34	52.4664	40.9906	40.751	70.313	18.9544	29.7154	41.9058	36.4621	Down Regulated
ENSG00000260194	ENSG00000260194.1		53998313	53999969	-1	lncRNA	novel transcript, antisense to FTO	38.119	0.446232	0.210319	0.00490954	0.0226745	41	37	67	55	74	64	62	61	37.0883	28.6161	63.4957	55.2459	73.8223	65.5789	64.954	65.4173	Up Regulated
ENSG00000197182	ENSG00000197182.14	MIRLET7BHG	46053869	46113928	1	lncRNA	MIRLET7B host gene [Source:HGNC Symbol;Acc:HGNC:37189]	899.87	0.471191	0.227704	0.00496527	0.0228837	1210	1983	1063	1061	1861	1636	1652	1764	1094.56	1533.67	1007.4	1065.74	1856.53	1676.36	1730.71	1891.74	Up Regulated
ENSG00000286136	ENSG00000286136.1		108669949	108678874	1	lncRNA	novel transcript	27.1025	-0.559417	0.28823	0.0049661	0.0228837	27	27	25	27	14	13	19	9	24.424	20.882	23.6924	27.1207	13.9664	13.3207	19.9053	9.65174	Down Regulated
ENSG00000268230	ENSG00000268230.5		58346854	58362751	-1	lncRNA	novel transcript	104.742	0.380347	0.168381	0.00497258	0.0229032	75	69	82	59	85	79	103	76	67.8445	53.3651	77.7112	59.2638	84.7958	80.9489	107.907	81.5036	Up Regulated
ENSG00000258545	ENSG00000258545.5	RHOXF1-AS1	120036236	120146855	1	lncRNA	RHOXF1 antisense RNA 1 [Source:HGNC Symbol;Acc:HGNC:51582]	4.80775	-1.01047	0.777504	0.00499189	0.0229819	24	11	10	42	9	6	4	7	21.7102	8.50748	9.47697	42.1878	8.97838	6.14802	4.19058	7.50691	Down Regulated
ENSG00000249669	ENSG00000249669.9	CARMN	149406689	149432835	1	lncRNA	cardiac mesoderm enhancer-associated non-coding RNA [Source:HGNC Symbol;Acc:HGNC:42872]	29.7152	-0.755935	0.503063	0.00499831	0.0230008	202	123	25	6	32	39	23	41	182.728	95.1291	23.6924	6.02683	31.9231	39.9621	24.0958	43.969	Down Regulated
ENSG00000228113	ENSG00000228113.7		88219359	88304367	1	lncRNA	novel transcript, antisense to STEAP4	13.908	0.685322	0.399469	0.00500926	0.0230408	19	11	8	17	21	19	28	26	17.1873	8.50748	7.58158	17.076	20.9496	19.4687	29.3341	27.8828	Up Regulated
ENSG00000284719	ENSG00000284719.1		39799419	39809450	1	lncRNA	novel transcript	342.366	-0.401411	0.182184	0.00501289	0.023047	431	708	422	954	409	367	393	401	389.88	547.572	399.928	958.266	408.018	376.054	411.725	430.039	Down Regulated
ENSG00000236453	ENSG00000236453.5		94022833	94066661	1	lncRNA	novel transcript	25.572	1.22665	0.790536	0.00502763	0.0230991	0	0	4	3	4	5	8	5	0	0	3.79079	3.01341	3.99039	5.12335	8.38116	5.36208	Up Regulated
ENSG00000261369	ENSG00000261369.1		47299447	47317814	1	lncRNA	novel transcript, antisense to ITFG1	48.2086	0.387829	0.173304	0.00504066	0.0231538	66	69	82	69	93	86	97	72	59.7031	53.3651	77.7112	69.3085	92.7766	88.1216	101.622	77.2139	Up Regulated
ENSG00000261188	ENSG00000261188.1	TFIP11-DT	26512503	26514568	1	lncRNA	TFIP11 divergent transcript [Source:HGNC Symbol;Acc:HGNC:55374]	26.7272	-0.543499	0.277513	0.00505464	0.0231992	23	34	28	27	16	18	8	17	20.8056	26.2958	26.5355	27.1207	15.9616	18.4441	8.38116	18.2311	Down Regulated
ENSG00000268858	ENSG00000268858.2		63861212	63864293	-1	lncRNA	novel transcript, antisense to ABHD16B	585.916	0.311296	0.129375	0.0050665	0.0232221	482	594	534	439	601	575	565	551	436.014	459.404	506.07	440.963	599.557	589.185	591.92	590.901	Up Regulated
ENSG00000261798	ENSG00000261798.1		39788976	39790171	1	lncRNA	novel transcript, antisense to BMP8B	34.6145	-0.577034	0.312509	0.0051297	0.0234341	30	93	49	120	49	33	37	30	27.1378	71.9268	46.4372	120.537	48.8823	33.8141	38.7629	32.1725	Down Regulated
ENSG00000254551	ENSG00000254551.1		83209431	83213379	-1	lncRNA	novel transcript	10.7878	0.729734	0.427951	0.00518543	0.0236317	8	3	14	22	22	22	22	19	7.23674	2.32022	13.2678	22.0984	21.9472	22.5427	23.0482	20.3759	Up Regulated
ENSG00000271270	ENSG00000271270.6	TMCC1-DT	129893811	129918578	1	lncRNA	TMCC1 divergent transcript [Source:HGNC Symbol;Acc:HGNC:49060]	386.549	-0.234389	0.0916391	0.00520699	0.023714	363	571	504	536	362	385	329	363	328.367	441.615	477.639	538.397	361.131	394.498	344.675	389.287	Down Regulated
ENSG00000280106	ENSG00000280106.1		34949038	34951205	-1	lncRNA	TEC	34.2326	-0.466035	0.225171	0.00525696	0.023888	36	57	38	37	19	26	22	29	32.5653	44.0842	36.0125	37.1654	18.9544	26.6414	23.0482	31.1	Down Regulated
ENSG00000275576	ENSG00000275576.1		32116171	32116629	1	lncRNA	novel transcript, sense intronic to TM9SF4	23.8453	0.52105	0.268237	0.00533445	0.0241645	22	28	24	25	31	34	30	44	19.901	21.6554	22.7447	25.1118	30.9255	34.8388	31.4294	47.1863	Up Regulated
ENSG00000269924	ENSG00000269924.1		47527397	47528148	1	lncRNA	novel transcript, sense intronic to KIAA0146	83.0401	0.417307	0.19472	0.00535674	0.0242546	82	105	147	165	157	148	139	191	74.1766	81.2077	139.311	165.738	156.623	151.651	145.623	204.831	Up Regulated
ENSG00000286035	ENSG00000286035.1		83075957	83085600	1	lncRNA	novel transcript	18.6594	-0.695661	0.43038	0.00535921	0.0242604	89	138	45	35	40	22	37	29	80.5088	106.73	42.6464	35.1565	39.9039	22.5427	38.7629	31.1	Down Regulated
ENSG00000273066	ENSG00000273066.5		136799223	136810042	1	lncRNA	novel transcript	36.38	-0.446739	0.219519	0.00539093	0.0243768	46	57	49	74	32	26	36	38	41.6113	44.0842	46.4372	74.3309	31.9231	26.6414	37.7152	40.7518	Down Regulated
ENSG00000238280	ENSG00000238280.2		62682652	62805887	-1	lncRNA	novel transcript	30.5555	-0.655099	0.374828	0.00539736	0.0243924	32	13	13	24	11	9	8	10	28.947	10.0543	12.3201	24.1073	10.9736	9.22203	8.38116	10.7242	Down Regulated
ENSG00000261618	ENSG00000261618.2	LINC02605	78835307	78840525	1	lncRNA	long intergenic non-protein coding RNA 2605 [Source:HGNC Symbol;Acc:HGNC:53974]	12.9068	2.08428	1.92153	0.00539808	0.0243924	2	2	0	0	11	5	9	11	1.80919	1.54681	0	0	10.9736	5.12335	9.42881	11.7966	Up Regulated
ENSG00000259820	ENSG00000259820.1	MIR30DHG	134792020	134798272	-1	lncRNA	MIR30D and MIR30B host gene [Source:HGNC Symbol;Acc:HGNC:56081]	1176.97	0.373372	0.167157	0.00546924	0.0246431	705	598	959	929	1004	998	1007	891	637.738	462.497	908.841	933.154	1001.59	1022.62	1054.98	955.522	Up Regulated
ENSG00000225187	ENSG00000225187.1		47067822	47071204	1	lncRNA	novel transcript	54.6038	0.498012	0.249973	0.00547087	0.024645	65	120	123	80	127	111	143	146	58.7985	92.8088	116.567	80.3577	126.695	113.738	149.813	156.573	Up Regulated
ENSG00000185168	ENSG00000185168.5	LINC00482	81303771	81309278	-1	lncRNA	long intergenic non-protein coding RNA 482 [Source:HGNC Symbol;Acc:HGNC:26816]	130.223	-0.486922	0.257395	0.00549941	0.0247542	89	177	77	216	78	88	76	67	80.5088	136.893	72.9727	216.966	77.8127	90.1709	79.621	71.8518	Down Regulated
ENSG00000282864	ENSG00000282864.1		91485793	91486870	1	lncRNA	TEC	42.9105	-0.432575	0.207053	0.00561909	0.0251399	133	113	69	83	51	57	56	71	120.311	87.395	65.3911	83.3711	50.8775	58.4062	58.6681	76.1415	Down Regulated
ENSG00000249249	ENSG00000249249.1	TICAM2-AS1	115602057	115623897	1	lncRNA	TICAM2 antisense RNA 1 [Source:HGNC Symbol;Acc:HGNC:55575]	30.1711	-0.563799	0.308783	0.00566169	0.025297	29	35	39	56	24	11	19	28	26.2332	27.0692	36.9602	56.2504	23.9424	11.2714	19.9053	30.0276	Down Regulated
ENSG00000253161	ENSG00000253161.5	LINC01605	37421341	37554183	-1	lncRNA	long intergenic non-protein coding RNA 1605 [Source:HGNC Symbol;Acc:HGNC:51654]	59.3934	0.755688	0.490771	0.00574315	0.0256103	3	7	18	2	16	16	9	16	2.71378	5.41385	17.0585	2.00894	15.9616	16.3947	9.42881	17.1586	Up Regulated
ENSG00000245888	ENSG00000245888.6	NSMCE1-DT	27268205	27290492	1	lncRNA	NSMCE1 divergent transcript [Source:HGNC Symbol;Acc:HGNC:51368]	21.0983	-0.614056	0.364521	0.00584185	0.0259706	26	39	16	28	15	11	13	12	23.5194	30.1629	15.1632	28.1252	14.964	11.2714	13.6194	12.869	Down Regulated
ENSG00000273014	ENSG00000273014.1		32758882	32759353	1	lncRNA	novel transcript	42.1639	-0.409161	0.19807	0.00584638	0.025985	106	113	56	73	49	53	48	58	95.8869	87.395	53.071	73.3264	48.8823	54.3075	50.287	62.2001	Down Regulated
ENSG00000279814	ENSG00000279814.1		75450081	75451725	1	lncRNA	TEC	98.3876	0.407237	0.191836	0.00589188	0.0261529	164	260	298	291	277	273	330	387	148.353	201.086	282.414	292.301	276.335	279.735	345.723	415.025	Up Regulated
ENSG00000267481	ENSG00000267481.1		19788755	19790531	-1	lncRNA	novel transcript, sense intronic to ZNF506	56.5319	-0.374384	0.172864	0.00600133	0.0265459	80	114	76	66	53	53	55	49	72.3674	88.1684	72.025	66.2951	52.8727	54.3075	57.6205	52.5484	Down Regulated
ENSG00000263393	ENSG00000263393.1		32122400	32124478	-1	lncRNA	novel transcript, antisense to RNF138	40.2679	-0.456127	0.227745	0.0060369	0.0266917	52	69	86	74	41	27	41	54	47.0388	53.3651	81.5019	74.3309	40.9015	27.6661	42.9535	57.9104	Down Regulated
ENSG00000249241	ENSG00000249241.1	LINC02265	40316484	40330422	1	lncRNA	long intergenic non-protein coding RNA 2265 [Source:HGNC Symbol;Acc:HGNC:53179]	13.7789	0.837091	0.575983	0.00608769	0.0268403	5	6	4	4	11	10	12	7	4.52296	4.64044	3.79079	4.01789	10.9736	10.2467	12.5717	7.50691	Up Regulated
ENSG00000256268	ENSG00000256268.1	LINC02454	65589111	65614169	1	lncRNA	long intergenic non-protein coding RNA 2454 [Source:HGNC Symbol;Acc:HGNC:53387]	63.2058	-1.00145	0.700871	0.0061703	0.0271515	19	8	8	2	2	3	2	4	17.1873	6.18726	7.58158	2.00894	1.9952	3.07401	2.09529	4.28966	Down Regulated
ENSG00000214900	ENSG00000214900.9	LINC01588	49927571	50105102	-1	lncRNA	long intergenic non-protein coding RNA 1588 [Source:HGNC Symbol;Acc:HGNC:27503]	242.606	0.358112	0.161458	0.00617519	0.0271612	141	131	90	116	149	165	131	119	127.548	101.316	85.2927	116.519	148.642	169.071	137.242	127.617	Up Regulated
ENSG00000177406	ENSG00000177406.4	NINJ2-AS1	630858	664196	1	lncRNA	NINJ2 antisense RNA 1 [Source:HGNC Symbol;Acc:HGNC:40405]	272.343	-0.257029	0.111062	0.00626694	0.0274815	320	285	206	180	213	176	153	152	289.47	220.421	195.226	180.805	212.488	180.342	160.29	163.007	Down Regulated
ENSG00000250748	ENSG00000250748.6	MSRB3-AS1	65466820	65642372	-1	lncRNA	MSRB3 antisense RNA 1 [Source:HGNC Symbol;Acc:HGNC:53386]	48.4001	-0.79557	0.516032	0.00634011	0.0277424	19	5	9	16	5	2	7	5	17.1873	3.86703	8.52927	16.0715	4.98799	2.04934	7.33352	5.36208	Down Regulated
ENSG00000230393	ENSG00000230393.1		100104919	100107504	1	lncRNA	novel transcript	12.7547	-0.740324	0.519303	0.00636272	0.0278236	19	26	22	56	14	16	4	16	17.1873	20.1086	20.8493	56.2504	13.9664	16.3947	4.19058	17.1586	Down Regulated
ENSG00000223522	ENSG00000223522.1		28307063	28310560	-1	lncRNA	novel transcript	76.8235	0.31182	0.135458	0.00646862	0.0282057	79	136	147	124	143	128	135	142	71.4628	105.183	139.311	124.554	142.657	131.158	141.432	152.283	Up Regulated
ENSG00000276842	ENSG00000276842.1		25103124	25103869	-1	lncRNA	novel transcript, antisense to LRMP	110.862	-0.443567	0.222784	0.00647422	0.0282198	363	242	209	182	139	143	141	157	328.367	187.164	198.069	182.814	138.666	146.528	147.718	168.369	Down Regulated
ENSG00000278970	ENSG00000278970.2	HEIH	180826871	180831621	-1	lncRNA	hepatocellular carcinoma up-regulated EZH2-associated long non-coding RNA [Source:HGNC Symbol;Acc:HGNC:45049]	162.872	-0.299863	0.132002	0.00651475	0.0283782	140	173	121	122	84	108	92	91	126.643	133.799	114.671	122.545	83.7983	110.664	96.3834	97.5898	Down Regulated
ENSG00000270344	ENSG00000270344.2	POC1B-AS1	89524594	89548005	1	lncRNA	POC1B antisense RNA 1 [Source:HGNC Symbol;Acc:HGNC:52949]	194.427	0.294737	0.126111	0.00662449	0.0287668	222	181	251	173	232	223	221	244	200.82	139.987	237.872	173.774	231.443	228.501	231.53	261.669	Up Regulated
ENSG00000225963	ENSG00000225963.7		230121370	230174223	1	lncRNA	novel transcript, antisense to SP110	84.5634	0.401016	0.192524	0.00665992	0.0288764	99	98	81	34	107	102	63	110	89.5547	75.7939	76.7635	34.152	106.743	104.516	66.0017	117.966	Up Regulated
ENSG00000279092	ENSG00000279092.1		34415450	34420273	-1	lncRNA	TEC	27.2319	-0.482669	0.254388	0.00668504	0.0289523	50	72	38	70	37	29	31	31	45.2296	55.6853	36.0125	70.313	36.9111	29.7154	32.477	33.2449	Down Regulated
ENSG00000249407	ENSG00000249407.1	IL20RB-AS1	136959125	136982196	-1	lncRNA	IL20RB antisense RNA 1 [Source:HGNC Symbol;Acc:HGNC:40298]	24.5305	0.528296	0.286652	0.00670812	0.0290152	27	34	30	34	57	44	38	40	24.424	26.2958	28.4309	34.152	56.8631	45.0855	39.8105	42.8966	Up Regulated
ENSG00000253539	ENSG00000253539.1		99796615	99799187	-1	lncRNA	novel transcript	33.4338	0.42993	0.213895	0.00672836	0.029078	27	48	45	57	51	45	59	72	24.424	37.1235	42.6464	57.2549	50.8775	46.1101	61.8111	77.2139	Up Regulated
ENSG00000281468	ENSG00000281468.1		27802838	27803472	1	lncRNA	novel transcript, sense intronic to novel transcript	25.052	-0.523814	0.287174	0.00677469	0.0292346	22	60	22	32	15	16	20	20	19.901	46.4044	20.8493	32.1431	14.964	16.3947	20.9529	21.4483	Down Regulated
ENSG00000247903	ENSG00000247903.1		26971586	26979582	1	lncRNA	novel transcript, antisense to TM7SF3	47.2765	-0.350105	0.15935	0.00678694	0.0292688	94	98	95	91	59	60	62	64	85.0317	75.7939	90.0312	91.4069	58.8583	61.4802	64.954	68.6346	Down Regulated
ENSG00000248671	ENSG00000248671.7	ALG1L9P	71673885	71813859	-1	lncRNA	ALG1 like 9, pseudogene [Source:NCBI gene (formerly Entrezgene);Acc:285407]	21.7315	0.521126	0.287541	0.00681197	0.0293581	27	26	29	7	25	33	26	42	24.424	20.1086	27.4832	7.0313	24.94	33.8141	27.2388	45.0414	Up Regulated
ENSG00000223911	ENSG00000223911.1		147899401	147902956	-1	lncRNA	novel transcript	28.8734	0.7053	0.47877	0.00693505	0.0297874	7	12	5	8	11	10	24	13	6.33215	9.28088	4.73848	8.03577	10.9736	10.2467	25.1435	13.9414	Up Regulated
ENSG00000231621	ENSG00000231621.1	ANKRD44-AS1	197197927	197199276	1	lncRNA	ANKRD44 antisense RNA 1 [Source:HGNC Symbol;Acc:HGNC:41090]	13.8247	0.571083	0.336253	0.00696468	0.0298918	20	12	16	11	22	18	21	29	18.0919	9.28088	15.1632	11.0492	21.9472	18.4441	22.0006	31.1	Up Regulated
ENSG00000284602	ENSG00000284602.1		25232586	25234775	1	lncRNA	novel transcript	55.1654	-0.355454	0.169843	0.0070381	0.0301345	66	103	86	76	57	44	60	49	59.7031	79.6609	81.5019	76.3398	56.8631	45.0855	62.8587	52.5484	Down Regulated
ENSG00000232453	ENSG00000232453.6	LINC02777	58882868	58931897	-1	lncRNA	long intergenic non-protein coding RNA 2777 [Source:HGNC Symbol;Acc:HGNC:54297]	26.2474	-0.613714	0.374492	0.00706882	0.0302023	29	32	18	15	18	12	9	5	26.2332	24.749	17.0585	15.0671	17.9568	12.296	9.42881	5.36208	Down Regulated
ENSG00000247240	ENSG00000247240.7	UBL7-DT	74461248	74513971	1	lncRNA	UBL7 divergent transcript [Source:HGNC Symbol;Acc:HGNC:48614]	136.869	-0.300392	0.130837	0.00712445	0.0303825	281	339	216	170	154	171	183	168	254.191	262.185	204.703	170.76	153.63	175.219	191.719	180.166	Down Regulated
ENSG00000229931	ENSG00000229931.1	ATXN1-AS1	16761138	16763947	1	lncRNA	ATXN1 antisense RNA 1 [Source:HGNC Symbol;Acc:HGNC:40515]	27.1177	0.53699	0.307491	0.00712951	0.0303865	13	18	25	19	23	26	32	29	11.7597	13.9213	23.6924	19.085	22.9448	26.6414	33.5247	31.1	Up Regulated
ENSG00000285863	ENSG00000285863.1		61861109	61894164	1	lncRNA	novel transcript, antisense to VPS13C	91.9552	0.323084	0.14429	0.00715202	0.0304558	107	132	134	136	139	140	153	150	96.7914	102.09	126.991	136.608	138.666	143.454	160.29	160.862	Up Regulated
ENSG00000245248	ENSG00000245248.7	USP2-AS1	119356467	119659284	1	lncRNA	USP2 antisense RNA 1 [Source:HGNC Symbol;Acc:HGNC:48673]	210.357	-0.335856	0.154999	0.00715365	0.0304558	301	236	182	218	160	153	141	159	272.282	182.524	172.481	218.975	159.616	156.774	147.718	170.514	Down Regulated
ENSG00000267272	ENSG00000267272.5	LINC01140	87129765	87169198	1	lncRNA	long intergenic non-protein coding RNA 1140 [Source:HGNC Symbol;Acc:HGNC:27922]	88.0628	-0.4004	0.195215	0.00715664	0.0304558	189	123	79	89	86	77	69	61	170.968	95.1291	74.8681	89.3979	85.7934	78.8996	72.2875	65.4173	Down Regulated
ENSG00000257741	ENSG00000257741.5	LINC01490	80763151	80770717	1	lncRNA	long intergenic non-protein coding RNA 1490 [Source:HGNC Symbol;Acc:HGNC:51146]	11.4143	0.645211	0.423803	0.0071856	0.0305439	28	7	11	16	20	27	28	31	25.3286	5.41385	10.4247	16.0715	19.952	27.6661	29.3341	33.2449	Up Regulated
ENSG00000271643	ENSG00000271643.2	PDCD6IP-DT	33793644	33798539	-1	lncRNA	PDCD6IP divergent transcript [Source:HGNC Symbol;Acc:HGNC:55244]	155.009	-0.368791	0.173049	0.00719494	0.030574	135	111	77	57	64	57	53	65	122.12	85.8482	72.9727	57.2549	63.8463	58.4062	55.5252	69.707	Down Regulated
ENSG00000273369	ENSG00000273369.1		44693946	44694386	-1	lncRNA	novel transcript, antisense to GUF1	31.9657	-0.472474	0.253201	0.00725893	0.0307751	35	51	39	45	20	27	27	21	31.6608	39.4438	36.9602	45.2012	19.952	27.6661	28.2864	22.5207	Down Regulated
ENSG00000236308	ENSG00000236308.1		100190036	100190747	1	lncRNA	novel transcript, antisense to CHUK	11.0137	-0.545507	0.315813	0.00727883	0.0308273	25	33	33	30	15	16	17	14	22.6148	25.5224	31.274	30.1341	14.964	16.3947	17.81	15.0138	Down Regulated
ENSG00000281741	ENSG00000281741.2		120913151	120914238	-1	lncRNA	TEC	25.9165	0.531493	0.306228	0.00732713	0.0309801	21	19	27	28	39	41	34	26	18.9965	14.6947	25.5878	28.1252	38.9063	42.0115	35.6199	27.8828	Up Regulated
ENSG00000273064	ENSG00000273064.1		68252870	68253848	1	lncRNA	novel transcript	14.3368	-0.563436	0.336802	0.00743046	0.0313648	23	34	28	37	12	17	19	13	20.8056	26.2958	26.5355	37.1654	11.9712	17.4194	19.9053	13.9414	Down Regulated
ENSG00000228242	ENSG00000228242.6	XPC-AS1	14144637	14165978	1	lncRNA	XPC antisense RNA 1 [Source:HGNC Symbol;Acc:HGNC:55014]	133.026	0.324829	0.146529	0.00745251	0.0314122	124	122	137	125	133	168	132	150	112.17	94.3557	129.834	125.559	132.681	172.145	138.289	160.862	Up Regulated
ENSG00000286071	ENSG00000286071.1		231767464	231847803	-1	lncRNA	disrupted in schizophrenia 2	1186.91	0.353227	0.164292	0.0074611	0.0314354	1445	1945	2645	2147	2436	2267	2277	2766	1307.14	1504.28	2506.66	2156.6	2430.15	2322.93	2385.49	2966.3	Up Regulated
ENSG00000274925	ENSG00000274925.1	ZKSCAN2-DT	25257952	25261066	1	lncRNA	ZKSCAN2 divergent transcript [Source:HGNC Symbol;Acc:HGNC:53912]	81.9275	-0.335157	0.152812	0.00748137	0.0315077	88	104	82	102	58	68	54	67	79.6042	80.4343	77.7112	102.456	57.8607	69.6775	56.5728	71.8518	Down Regulated
ENSG00000260000	ENSG00000260000.2		100881450	100882993	1	lncRNA	novel transcript, antisense to ASCC3	52.8531	-0.407074	0.201692	0.00756358	0.031788	71	73	59	36	37	40	36	31	64.2261	56.4587	55.9141	36.161	36.9111	40.9868	37.7152	33.2449	Down Regulated
ENSG00000278881	ENSG00000278881.2		47115838	47117217	-1	lncRNA	TEC	26.1474	0.434573	0.223329	0.00757484	0.0318156	32	43	39	37	55	41	43	56	28.947	33.2565	36.9602	37.1654	54.8679	42.0115	45.0488	60.0553	Up Regulated
ENSG00000215483	ENSG00000215483.10	LINC00598	40079106	40535807	-1	lncRNA	long intergenic non-protein coding RNA 598 [Source:HGNC Symbol;Acc:HGNC:42770]	16.0036	0.622875	0.40567	0.00762823	0.0320001	8	11	14	11	18	22	17	16	7.23674	8.50748	13.2678	11.0492	17.9568	22.5427	17.81	17.1586	Up Regulated
ENSG00000230910	ENSG00000230910.3	ADGRB3-DT	68627879	68635169	-1	lncRNA	ADGRB3 divergent transcript [Source:HGNC Symbol;Acc:HGNC:55774]	52.2558	-0.394728	0.195809	0.00768333	0.0321847	158	167	120	79	76	84	69	88	142.926	129.159	113.724	79.3532	75.8175	86.0723	72.2875	94.3726	Down Regulated
ENSG00000242588	ENSG00000242588.6		128531707	128663479	1	lncRNA	novel transcript	168.892	0.277962	0.120034	0.00775815	0.0324475	219	250	214	194	246	205	228	274	198.106	193.352	202.807	194.867	245.409	210.057	238.863	293.842	Up Regulated
ENSG00000259802	ENSG00000259802.1		10323547	10354062	-1	lncRNA	novel transcript, antisense to MARCH6	39.9031	0.350239	0.163321	0.00775883	0.0324475	55	82	45	47	71	68	54	74	49.7526	63.4194	42.6464	47.2102	70.8295	69.6775	56.5728	79.3587	Up Regulated
ENSG00000263089	ENSG00000263089.1		57092145	57096425	-1	lncRNA	novel transcript, antisense to AKAP1	54.9767	-0.393112	0.195072	0.00791407	0.0329837	135	177	127	186	107	71	90	117	122.12	136.893	120.358	186.832	106.743	72.7516	94.2881	125.473	Down Regulated
ENSG00000215808	ENSG00000215808.3	LINC01139	238476542	238486060	-1	lncRNA	long intergenic non-protein coding RNA 1139 [Source:HGNC Symbol;Acc:HGNC:27924]	227.485	0.434989	0.227285	0.00792097	0.0330032	158	155	263	176	233	278	247	231	142.926	119.878	249.244	176.787	232.44	284.858	258.768	247.728	Up Regulated
ENSG00000260616	ENSG00000260616.6		50783859	50803338	-1	lncRNA	novel transcript, antisense to CYLD	13.2973	0.655107	0.462901	0.0080537	0.0334739	10	11	10	14	9	28	19	23	9.04593	8.50748	9.47697	14.0626	8.97838	28.6908	19.9053	24.6656	Up Regulated
ENSG00000270072	ENSG00000270072.1		47513605	47514889	-1	lncRNA	novel transcript	36.9684	0.490324	0.277655	0.00809486	0.0336105	39	31	67	30	58	47	39	90	35.2791	23.9756	63.4957	30.1341	57.8607	48.1595	40.8582	96.5174	Up Regulated
ENSG00000284634	ENSG00000284634.1		9448295	9658392	1	lncRNA	novel transcript	24.2672	0.432618	0.224963	0.00810107	0.0336226	39	58	33	25	54	47	45	52	35.2791	44.8576	31.274	25.1118	53.8703	48.1595	47.144	55.7656	Up Regulated
ENSG00000263982	ENSG00000263982.1		76372717	76378275	1	lncRNA	novel transcript, antisense to ZFN156	32.193	0.404715	0.204849	0.0082622	0.0341101	31	70	60	50	71	57	62	73	28.0424	54.1385	56.8618	50.2236	70.8295	58.4062	64.954	78.2863	Up Regulated
ENSG00000260032	ENSG00000260032.2	NORAD	36045618	36051018	-1	lncRNA	non-coding RNA activated by DNA damage [Source:HGNC Symbol;Acc:HGNC:44311]	9718.25	-0.180809	0.0725333	0.00828773	0.0341739	11093	11189	8301	6642	7193	7224	7187	6459	10034.6	8653.65	7866.83	6671.7	7175.72	7402.21	7529.43	6926.73	Down Regulated
ENSG00000284657	ENSG00000284657.1		25239494	25240253	1	lncRNA	novel transcript	14.5385	0.585275	0.378322	0.0082922	0.0341826	11	19	15	15	28	18	25	24	9.95052	14.6947	14.2155	15.0671	27.9328	18.4441	26.1911	25.738	Up Regulated
ENSG00000245975	ENSG00000245975.2	MINDY2-DT	58768072	58770974	-1	lncRNA	MINDY2 divergent transcript [Source:HGNC Symbol;Acc:HGNC:55889]	15.7074	-0.615693	0.417205	0.00834456	0.0343454	55	23	22	10	15	13	11	11	49.7526	17.7884	20.8493	10.0447	14.964	13.3207	11.5241	11.7966	Down Regulated
ENSG00000279981	ENSG00000279981.1		79496058	79498348	1	lncRNA	TEC	26.4798	0.52891	0.319111	0.00838876	0.0344994	19	26	23	30	50	29	33	33	17.1873	20.1086	21.797	30.1341	49.8799	29.7154	34.5723	35.3897	Up Regulated
ENSG00000229331	ENSG00000229331.1	GK-IT1	30671635	30672166	1	lncRNA	GK intronic transcript 1 [Source:HGNC Symbol;Acc:HGNC:41339]	17.8205	0.556264	0.352855	0.00839319	0.0345106	15	21	24	20	35	24	26	38	13.5689	16.2415	22.7447	20.0894	34.9159	24.5921	27.2388	40.7518	Up Regulated
ENSG00000266378	ENSG00000266378.1		14327335	14329474	1	lncRNA	novel transcript	13.8252	0.663024	0.485361	0.008447	0.0347038	11	15	11	6	15	21	16	24	9.95052	11.6011	10.4247	6.02683	14.964	21.5181	16.7623	25.738	Up Regulated
ENSG00000225632	ENSG00000225632.1		54285404	54287371	1	lncRNA	novel transcript	20.5112	0.527069	0.318598	0.0084821	0.0348268	53	28	32	23	42	41	41	75	47.9434	21.6554	30.3263	23.1028	41.8991	42.0115	42.9535	80.4312	Up Regulated
ENSG00000224897	ENSG00000224897.7	POT1-AS1	124929873	125482966	1	lncRNA	POT1 antisense RNA 1 [Source:HGNC Symbol;Acc:HGNC:49459]	65.4417	-0.471154	0.261015	0.0085945	0.0352527	37	34	30	35	27	13	23	13	33.4699	26.2958	28.4309	35.1565	26.9352	13.3207	24.0958	13.9414	Down Regulated
ENSG00000251632	ENSG00000251632.1	LINC02172	137545731	137603430	1	lncRNA	long intergenic non-protein coding RNA 2172 [Source:HGNC Symbol;Acc:HGNC:53034]	62.9434	0.427581	0.225842	0.00864991	0.0354153	45	47	63	16	50	48	52	69	40.7067	36.3501	59.7049	16.0715	49.8799	49.1841	54.4776	73.9967	Up Regulated
ENSG00000176236	ENSG00000176236.6	RPP38-DT	15095385	15097319	-1	lncRNA	RPP38 divergent transcript [Source:HGNC Symbol;Acc:HGNC:28582]	19.0723	0.55437	0.353663	0.00870334	0.0355674	25	12	21	22	28	32	41	23	22.6148	9.28088	19.9016	22.0984	27.9328	32.7894	42.9535	24.6656	Up Regulated
ENSG00000228223	ENSG00000228223.3	HCG11	26521709	26527404	1	lncRNA	HLA complex group 11 [Source:HGNC Symbol;Acc:HGNC:17707]	426.018	-0.207074	0.0852972	0.0087116	0.0355795	396	471	322	289	290	266	272	263	358.219	364.275	305.158	290.292	289.303	272.562	284.96	282.045	Down Regulated
ENSG00000228363	ENSG00000228363.2	CHMP3-AS1	86562070	86618766	1	lncRNA	CHMP3 and RNF103 antisense RNA 1 [Source:HGNC Symbol;Acc:HGNC:55795]	114.729	0.29914	0.135181	0.00874939	0.0357006	99	117	143	127	134	159	104	148	89.5547	90.4886	135.521	127.568	133.678	162.922	108.955	158.717	Up Regulated
ENSG00000269220	ENSG00000269220.1	LINC00528	17777322	17779481	1	lncRNA	long intergenic non-protein coding RNA 528 [Source:HGNC Symbol;Acc:HGNC:26875]	49.9702	0.415084	0.218095	0.00907254	0.0366948	48	59	42	28	58	51	45	69	43.4205	45.631	39.8033	28.1252	57.8607	52.2582	47.144	73.9967	Up Regulated
ENSG00000235245	ENSG00000235245.1	AL360181.2	133295187	133295977	-1	lncRNA	novel transcript	51.7762	0.414404	0.218198	0.0090845	0.036714	64	74	62	62	81	92	77	83	57.8939	57.2321	58.7572	62.2772	80.8055	94.2696	80.6687	89.0105	Up Regulated
ENSG00000260279	ENSG00000260279.3		89296128	89298317	1	lncRNA	novel transcript, antisense to ANKRD11	221.644	0.323912	0.151667	0.00909102	0.0367195	237	326	260	272	337	245	289	380	214.389	252.131	246.401	273.216	336.191	251.044	302.77	407.518	Up Regulated
ENSG00000271913	ENSG00000271913.6	TAGAP-AS1	158988178	159088114	1	lncRNA	TAGAP antisense RNA 1 [Source:HGNC Symbol;Acc:HGNC:55239]	220.74	-0.264679	0.116459	0.00925411	0.0372881	305	371	376	397	255	242	259	270	275.901	286.934	356.334	398.775	254.388	247.97	271.34	289.552	Down Regulated
ENSG00000250626	ENSG00000250626.2		188777672	188818522	-1	lncRNA	novel transcript	16.8009	-0.557718	0.372535	0.00931901	0.0374531	24	36	30	69	21	23	20	15	21.7102	27.8427	28.4309	69.3085	20.9496	23.5674	20.9529	16.0862	Down Regulated
ENSG00000279766	ENSG00000279766.1		140572142	140572812	-1	lncRNA	TEC	22.9259	0.560506	0.370423	0.00933921	0.0375194	4	15	18	15	13	25	18	25	3.61837	11.6011	17.0585	15.0671	12.9688	25.6167	18.8576	26.8104	Up Regulated
ENSG00000258450	ENSG00000258450.1		49629291	49629890	-1	lncRNA	novel transcript	24.626	0.514785	0.319906	0.00944645	0.0378305	38	21	27	31	58	39	39	37	34.3745	16.2415	25.5878	31.1386	57.8607	39.9621	40.8582	39.6794	Up Regulated
ENSG00000235703	ENSG00000235703.5	EOLA2-DT	149938613	150224580	1	lncRNA	EOLA2 divergent transcript [Source:HGNC Symbol;Acc:HGNC:48579]	122.509	0.301053	0.138652	0.00955653	0.0381885	136	166	181	188	199	161	200	196	123.025	128.386	171.533	188.841	198.522	164.972	209.529	210.193	Up Regulated
ENSG00000256576	ENSG00000256576.2	LINC02361	132186735	132189728	-1	lncRNA	long intergenic non-protein coding RNA 2361 [Source:HGNC Symbol;Acc:HGNC:53283]	37.3729	-0.465575	0.257956	0.00956609	0.0381912	49	76	41	32	23	40	21	26	44.3251	58.7789	38.8556	32.1431	22.9448	40.9868	22.0006	27.8828	Down Regulated
ENSG00000275560	ENSG00000275560.1	AC008115.3	12718973	12719521	1	lncRNA	novel transcript	25.6914	-0.505549	0.308644	0.00957244	0.038207	33	78	44	24	20	17	36	19	29.8516	60.3257	41.6987	24.1073	19.952	17.4194	37.7152	20.3759	Down Regulated
ENSG00000230063	ENSG00000230063.1		212297448	212299579	1	lncRNA	novel transcript, sense intronic to PPP2R5A	19.0128	-0.522198	0.327886	0.00965334	0.0384619	22	26	31	37	15	10	15	20	19.901	20.1086	29.3786	37.1654	14.964	10.2467	15.7147	21.4483	Down Regulated
ENSG00000184068	ENSG00000184068.2	SREBF2-AS1	41831215	41834665	-1	lncRNA	SREBF2 antisense RNA 1 [Source:HGNC Symbol;Acc:HGNC:53953]	151.744	0.262125	0.113257	0.00966482	0.0384925	130	238	161	153	158	184	190	192	117.597	184.071	152.579	153.684	157.621	188.539	199.053	205.904	Up Regulated
ENSG00000280155	ENSG00000280155.1		132130252	132131795	-1	lncRNA	TEC	17.3389	0.636285	0.475856	0.00971314	0.0386471	9	10	6	3	17	11	14	7	8.14134	7.73407	5.68618	3.01341	16.9592	11.2714	14.667	7.50691	Up Regulated
ENSG00000277287	ENSG00000277287.1		3239705	3245382	1	lncRNA	novel transcript	16.8499	0.51369	0.320149	0.00975849	0.0387971	15	28	20	19	36	20	30	33	13.5689	21.6554	18.9539	19.085	35.9135	20.4934	31.4294	35.3897	Up Regulated
ENSG00000226200	ENSG00000226200.6	SGMS1-AS1	50623466	50641451	1	lncRNA	SGMS1 antisense RNA 1 [Source:HGNC Symbol;Acc:HGNC:49683]	136.609	-0.254545	0.112189	0.0100183	0.0397021	289	294	178	185	170	183	149	165	261.427	227.382	168.69	185.827	169.592	187.515	156.099	176.949	Down Regulated
ENSG00000253557	ENSG00000253557.5		19084992	19259469	-1	lncRNA	novel transcript	50.7381	0.564777	0.385793	0.0101657	0.0401331	10	12	10	6	21	17	12	10	9.04593	9.28088	9.47697	6.02683	20.9496	17.4194	12.5717	10.7242	Up Regulated
ENSG00000285857	ENSG00000285857.1		61527340	61529160	1	lncRNA	novel transcript, antisense to XPO1	56.5796	-0.356349	0.178742	0.0102457	0.0403938	112	145	113	95	75	62	82	75	101.314	112.144	107.09	95.4248	74.8199	63.5295	85.9069	80.4312	Down Regulated
ENSG00000284738	ENSG00000284738.1		153923284	153935245	1	lncRNA	novel transcript, antisense to DENND4B	39.8836	0.405142	0.216961	0.0103055	0.040567	25	50	31	17	41	39	35	39	22.6148	38.6703	29.3786	17.076	40.9015	39.9621	36.6676	41.8242	Up Regulated
ENSG00000223901	ENSG00000223901.2		46220269	46225364	1	lncRNA	novel transcript	31.2354	0.457149	0.266392	0.0103373	0.0406605	19	25	20	26	30	34	26	32	17.1873	19.3352	18.9539	26.1163	29.9279	34.8388	27.2388	34.3173	Up Regulated
ENSG00000253474	ENSG00000253474.1		49086301	49229174	1	lncRNA	novel transcript	396.983	0.257223	0.114393	0.0103828	0.040808	549	510	495	401	510	549	527	508	496.622	394.438	469.11	402.793	508.775	562.544	552.109	544.787	Up Regulated
ENSG00000279759	ENSG00000279759.1		40355842	40360606	1	lncRNA	TEC	110.532	0.326142	0.157646	0.0104166	0.0409011	112	112	141	76	123	139	122	124	101.314	86.6216	133.625	76.3398	122.705	142.429	127.813	132.98	Up Regulated
ENSG00000272219	ENSG00000272219.1		101960116	101961894	1	lncRNA	novel transcript, sense intronic to CUX1	37.8097	0.471421	0.283252	0.010441	0.0409417	38	70	61	38	76	48	53	106	34.3745	54.1385	57.8095	38.1699	75.8175	49.1841	55.5252	113.676	Up Regulated
ENSG00000232518	ENSG00000232518.3		38668202	38671421	-1	lncRNA	novel transcript	13.009	-0.670509	0.510715	0.0105319	0.041236	17	21	17	10	8	7	5	7	15.3781	16.2415	16.1108	10.0447	7.98079	7.17269	5.23823	7.50691	Down Regulated
ENSG00000234601	ENSG00000234601.1	CHRM3-AS1	239898016	239899872	-1	lncRNA	CHRM3 antisense RNA 1 [Source:HGNC Symbol;Acc:HGNC:40150]	19.6803	0.551697	0.383324	0.0106039	0.041458	14	5	20	6	23	15	14	19	12.6643	3.86703	18.9539	6.02683	22.9448	15.37	14.667	20.3759	Up Regulated
ENSG00000254433	ENSG00000254433.1		106085990	106101975	-1	lncRNA	novel transcript	27.1717	-0.506997	0.307861	0.0106287	0.0415162	26	33	25	33	15	16	14	17	23.5194	25.5224	23.6924	33.1476	14.964	16.3947	14.667	18.2311	Down Regulated
ENSG00000279155	ENSG00000279155.1		48939992	48940808	1	lncRNA	TEC	37.1342	0.400093	0.21604	0.0106325	0.0415162	55	42	59	48	58	57	58	85	49.7526	32.4831	55.9141	48.2146	57.8607	58.4062	60.7634	91.1553	Up Regulated
ENSG00000273373	ENSG00000273373.1	SLC16A4-AS1	110370154	110373003	1	lncRNA	SLC16A4 antisense RNA 1 [Source:HGNC Symbol;Acc:HGNC:56051]	354.802	-0.243059	0.107237	0.0106997	0.0417547	674	770	751	621	444	509	517	549	609.696	595.523	711.72	623.777	442.934	521.557	541.633	588.756	Down Regulated
ENSG00000243150	ENSG00000243150.5	MLF1-DT	158545189	158571066	-1	lncRNA	MLF1 divergent transcript [Source:HGNC Symbol;Acc:HGNC:55620]	19.6835	0.492512	0.310886	0.0108653	0.0422062	19	20	21	20	33	34	24	24	17.1873	15.4681	19.9016	20.0894	32.9207	34.8388	25.1435	25.738	Up Regulated
ENSG00000273828	ENSG00000273828.2		46364551	46397994	1	lncRNA	novel transcript, antisense to ELMO2	160.074	-0.344668	0.172797	0.0108724	0.0422095	191	106	158	126	104	91	76	107	172.777	81.9811	149.736	126.563	103.75	93.2449	79.621	114.748	Down Regulated
ENSG00000257754	ENSG00000257754.1		103819610	103822085	1	lncRNA	novel transcript, antisense to NT5DC3	15.0926	-0.515437	0.354228	0.0108805	0.0422329	36	41	31	63	22	20	22	23	32.5653	31.7097	29.3786	63.2817	21.9472	20.4934	23.0482	24.6656	Down Regulated
ENSG00000260924	ENSG00000260924.2	LINC01311	19171395	19172851	1	lncRNA	long intergenic non-protein coding RNA 1311 [Source:HGNC Symbol;Acc:HGNC:50503]	29.915	-0.437039	0.250724	0.0110293	0.0427123	26	47	32	42	17	20	24	23	23.5194	36.3501	30.3263	42.1878	16.9592	20.4934	25.1435	24.6656	Down Regulated
ENSG00000275765	ENSG00000275765.5		151769783	151771508	-1	lncRNA	novel transcript	31.7222	-0.411942	0.228018	0.0110819	0.0428507	64	57	33	41	25	37	31	22	57.8939	44.0842	31.274	41.1833	24.94	37.9128	32.477	23.5931	Down Regulated
ENSG00000233086	ENSG00000233086.7	LNCARSR	79505804	79567802	-1	lncRNA	lncRNA regulator of Akt signaling associated with HCC and RCC [Source:HGNC Symbol;Acc:HGNC:53864]	26.1438	-0.416216	0.233634	0.011211	0.0432923	60	52	37	50	27	32	27	31	54.2756	40.2172	35.0648	50.2236	26.9352	32.7894	28.2864	33.2449	Down Regulated
ENSG00000278464	ENSG00000278464.1		34892013	34903504	-1	lncRNA	novel transcript	35.7191	0.37248	0.195605	0.0112313	0.0433626	39	45	49	50	61	55	61	47	35.2791	34.8033	46.4372	50.2236	60.8535	56.3568	63.9064	50.4035	Up Regulated
ENSG00000203321	ENSG00000203321.2	CARNMT1-AS1	74952968	74996293	1	lncRNA	CARNMT1 antisense RNA 1 [Source:HGNC Symbol;Acc:HGNC:51188]	18.941	-0.453286	0.269263	0.0113157	0.0436056	40	34	38	34	27	14	21	20	36.1837	26.2958	36.0125	34.152	26.9352	14.3454	22.0006	21.4483	Down Regulated
ENSG00000248019	ENSG00000248019.2	FAM13A-AS1	88709298	88730103	1	lncRNA	FAM13A antisense RNA 1 [Source:HGNC Symbol;Acc:HGNC:19370]	163.374	0.290564	0.136666	0.0113243	0.0436096	206	230	245	254	270	245	250	280	186.346	177.884	232.186	255.136	269.352	251.044	261.911	300.276	Up Regulated
ENSG00000273010	ENSG00000273010.1		110963302	110964649	1	lncRNA	novel transcript, antisense to LRIF1	33.7076	0.425652	0.231468	0.0114355	0.0438966	25	43	33	17	32	37	41	40	22.6148	33.2565	31.274	17.076	31.9231	37.9128	42.9535	42.8966	Up Regulated
ENSG00000224138	ENSG00000224138.1		127350128	127351523	1	lncRNA	novel transcript	69.113	-0.303453	0.145757	0.0115447	0.0442446	97	106	96	128	74	66	81	68	87.7455	81.9811	90.9789	128.572	73.8223	67.6282	84.8593	72.9242	Down Regulated
ENSG00000261019	ENSG00000261019.1		42901272	42902639	-1	lncRNA	novel transcript	15.2188	-0.568543	0.429087	0.0117093	0.0448078	15	16	16	18	6	11	4	9	13.5689	12.3745	15.1632	18.0805	5.98559	11.2714	4.19058	9.65174	Down Regulated
ENSG00000280007	ENSG00000280007.1		18110759	18131154	-1	lncRNA	novel transcript, antisense to TUBA8	247.042	-0.342999	0.175099	0.011849	0.0452062	497	385	207	190	222	205	191	194	449.583	297.762	196.173	190.85	221.467	210.057	200.1	208.049	Down Regulated
ENSG00000272087	ENSG00000272087.1		158693120	158693768	-1	lncRNA	novel transcript	24.1403	-0.465354	0.288119	0.0119375	0.0454753	26	34	30	29	17	16	12	20	23.5194	26.2958	28.4309	29.1297	16.9592	16.3947	12.5717	21.4483	Down Regulated
ENSG00000279059	ENSG00000279059.1		54956760	54958426	-1	lncRNA	TEC	49.8484	-0.351954	0.181938	0.0119434	0.0454893	79	70	74	58	43	48	49	39	71.4628	54.1385	70.1296	58.2593	42.8967	49.1841	51.3346	41.8242	Down Regulated
ENSG00000267249	ENSG00000267249.1		12670426	12671145	-1	lncRNA	novel transcript, sense intronic CEP76	20.5677	-0.485819	0.315875	0.0120318	0.0458142	34	31	33	25	9	24	19	13	30.7562	23.9756	31.274	25.1118	8.97838	24.5921	19.9053	13.9414	Down Regulated
ENSG00000284642	ENSG00000284642.1		10395416	10397432	1	lncRNA	novel transcript	25.5933	-0.481992	0.312338	0.0120532	0.0458601	28	24	46	29	13	20	13	22	25.3286	18.5618	43.5941	29.1297	12.9688	20.4934	13.6194	23.5931	Down Regulated
ENSG00000265415	ENSG00000265415.1	PRR11-AS1	59202677	59203829	-1	lncRNA	PRR11 antisense RNA 1 [Source:HGNC Symbol;Acc:HGNC:56242]	98.2136	-0.377811	0.205348	0.0122224	0.0463433	276	339	157	90	129	133	135	118	249.668	262.185	148.788	90.4024	128.69	136.281	141.432	126.545	Down Regulated
ENSG00000249859	ENSG00000249859.10	PVT1	127794526	128187101	1	lncRNA	Pvt1 oncogene [Source:HGNC Symbol;Acc:HGNC:9709]	873.795	0.222987	0.0985571	0.0122345	0.0463807	1031	1211	1348	1541	1338	1284	1300	1470	932.635	936.596	1277.5	1547.89	1334.79	1315.68	1361.94	1576.45	Up Regulated
ENSG00000227170	ENSG00000227170.1	TRPS1-AS1	115509602	115511325	1	lncRNA	TRPS1 antisense RNA 1 [Source:HGNC Symbol;Acc:HGNC:56224]	167.699	0.308385	0.151032	0.0122692	0.0464861	148	183	218	163	189	203	231	187	133.88	141.533	206.598	163.729	188.546	208.008	242.006	200.542	Up Regulated
ENSG00000251513	ENSG00000251513.2	LIX1-AS1	97089075	97437217	1	lncRNA	LIX1 and RIOK2 antisense RNA 1 [Source:HGNC Symbol;Acc:HGNC:52976]	15.5142	-0.557295	0.434342	0.0122864	0.046519	21	18	14	36	21	5	9	7	18.9965	13.9213	13.2678	36.161	20.9496	5.12335	9.42881	7.50691	Down Regulated
ENSG00000204054	ENSG00000204054.13	LINC00963	129476946	129513687	1	lncRNA	long intergenic non-protein coding RNA 963 [Source:HGNC Symbol;Acc:HGNC:48716]	2438.88	0.211928	0.0928505	0.0123896	0.0467688	2081	1962	1922	1237	1898	1978	1737	1759	1882.46	1517.42	1821.47	1242.53	1893.44	2026.8	1819.76	1886.38	Up Regulated
ENSG00000260167	ENSG00000260167.1		30585907	30608593	1	lncRNA	novel transcript, antisense to ZNF689	21.0923	-0.45467	0.282927	0.0123899	0.0467688	26	62	47	40	21	25	29	21	23.5194	47.9512	44.5418	40.1789	20.9496	25.6167	30.3817	22.5207	Down Regulated
ENSG00000233783	ENSG00000233783.7		25928754	25952614	1	lncRNA	novel transcript	99.8378	0.338667	0.173695	0.0124451	0.0469163	126	173	181	187	231	167	165	226	113.979	133.799	171.533	187.836	230.445	171.12	172.861	242.366	Up Regulated
ENSG00000241577	ENSG00000241577.1		48883955	48935213	-1	lncRNA	novel transcript, sense intronic to LRRC18	50.4702	0.352695	0.185132	0.0125092	0.0470793	60	78	88	81	86	85	90	107	54.2756	60.3257	83.3973	81.3622	85.7934	87.0969	94.2881	114.748	Up Regulated
ENSG00000236859	ENSG00000236859.6	NIFK-AS1	121649320	121728563	1	lncRNA	NIFK antisense RNA 1 [Source:HGNC Symbol;Acc:HGNC:27385]	129.921	-0.240909	0.108926	0.0125342	0.0471454	176	206	172	123	122	124	123	115	159.208	159.322	163.004	123.55	121.707	127.059	128.86	123.328	Down Regulated
ENSG00000228763	ENSG00000228763.1	LIMS1-AS1	108676795	108678601	-1	lncRNA	LIMS1 antisense RNA 1 [Source:HGNC Symbol;Acc:HGNC:40342]	72.8815	0.398251	0.226101	0.0125367	0.0471454	43	28	71	41	68	40	59	68	38.8975	21.6554	67.2865	41.1833	67.8367	40.9868	61.8111	72.9242	Up Regulated
ENSG00000236154	ENSG00000236154.1		69572906	69577165	1	lncRNA	novel transcript	27.2657	-0.449198	0.281468	0.0128403	0.0481205	22	60	36	54	21	22	20	32	19.901	46.4044	34.1171	54.2415	20.9496	22.5427	20.9529	34.3173	Down Regulated
ENSG00000253669	ENSG00000253669.3	GASAL1	102805517	102810039	1	lncRNA	growth arrest associated lncRNA 1 [Source:HGNC Symbol;Acc:HGNC:53461]	49.9571	0.442544	0.274331	0.0128566	0.0481724	43	36	32	33	47	47	58	43	38.8975	27.8427	30.3263	33.1476	46.8871	48.1595	60.7634	46.1139	Up Regulated
ENSG00000236841	ENSG00000236841.7		162159762	162173223	1	lncRNA	novel transcript	14.0072	-0.639943	0.646033	0.012942	0.048421	13	22	6	7	3	6	4	5	11.7597	17.015	5.68618	7.0313	2.99279	6.14802	4.19058	5.36208	Down Regulated
ENSG00000276900	ENSG00000276900.1		31729117	31731204	1	lncRNA	novel transcript, antisense to AMN1	251.931	0.31057	0.154485	0.01295	0.048442	101	149	180	102	154	150	150	151	91.3639	115.238	170.585	102.456	153.63	153.7	157.147	161.935	Up Regulated
ENSG00000226791	ENSG00000226791.6	LINC02611	98761098	98775361	-1	lncRNA	long intergenic non-protein coding RNA 2611 [Source:HGNC Symbol;Acc:HGNC:54060]	116.321	0.398967	0.227449	0.0129888	0.0485515	28	52	57	4	43	56	43	35	25.3286	40.2172	54.0187	4.01789	42.8967	57.3815	45.0488	37.5345	Up Regulated
ENSG00000283103	ENSG00000283103.2		58309727	58327252	-1	lncRNA	novel transcript, antisense to ERVK3-1	47.3819	-0.370576	0.208073	0.0130022	0.0485783	67	58	63	39	34	32	35	38	60.6077	44.8576	59.7049	39.1744	33.9183	32.7894	36.6676	40.7518	Down Regulated
ENSG00000272153	ENSG00000272153.1		3785008	3785538	1	lncRNA	novel transcript, antisense to LRRC47	23.4663	-0.447749	0.278055	0.0130051	0.0485783	25	40	28	33	18	23	12	17	22.6148	30.9363	26.5355	33.1476	17.9568	23.5674	12.5717	18.2311	Down Regulated
ENSG00000236434	ENSG00000236434.2		51264916	51266074	-1	lncRNA	novel transcript	20.1213	0.441128	0.272636	0.0130101	0.0485862	22	27	19	26	44	24	27	32	19.901	20.882	18.0062	26.1163	43.8943	24.5921	28.2864	34.3173	Up Regulated
ENSG00000260742	ENSG00000260742.1	ITPRID2-DT	181887851	181891663	-1	lncRNA	ITPRID2 divergent transcript [Source:HGNC Symbol;Acc:HGNC:55386]	52.5211	-0.36213	0.193322	0.0130425	0.0486611	79	92	62	81	56	47	43	51	71.4628	71.1534	58.7572	81.3622	55.8655	48.1595	45.0488	54.6932	Down Regulated
ENSG00000248927	ENSG00000248927.1		120781218	120790778	1	lncRNA	novel transcript	43.7736	0.578239	0.486356	0.0130425	0.0486611	5	2	8	7	7	11	8	12	4.52296	1.54681	7.58158	7.0313	6.98319	11.2714	8.38116	12.869	Up Regulated
ENSG00000266389	ENSG00000266389.1	PIK3R5-DT	8965896	8967070	1	lncRNA	PIK3R5 divergent transcript [Source:HGNC Symbol;Acc:HGNC:55321]	23.3807	0.470155	0.309609	0.0131152	0.0488442	23	18	23	11	26	26	33	21	20.8056	13.9213	21.797	11.0492	25.9376	26.6414	34.5723	22.5207	Up Regulated
ENSG00000234428	ENSG00000234428.2		26623369	26649479	1	lncRNA	novel transcript, antisense to ITPR2	31.7661	0.376283	0.20776	0.0131382	0.0488906	54	37	53	30	55	49	56	55	48.848	28.6161	50.2279	30.1341	54.8679	50.2088	58.6681	58.9828	Up Regulated
ENSG00000249219	ENSG00000249219.1		9922814	9924146	1	lncRNA	novel transcript	14.4191	0.469178	0.308655	0.0131616	0.0489472	28	29	26	14	35	29	38	34	25.3286	22.4288	24.6401	14.0626	34.9159	29.7154	39.8105	36.4621	Up Regulated
ENSG00000262185	ENSG00000262185.2	LINC02861	3930806	3950586	-1	lncRNA	long intergenic non-protein coding RNA 2861 [Source:HGNC Symbol;Acc:HGNC:54406]	10.6586	0.53841	0.412846	0.0131621	0.0489472	12	17	7	4	18	13	16	16	10.8551	13.1479	6.63388	4.01789	17.9568	13.3207	16.7623	17.1586	Up Regulated
ENSG00000228302	ENSG00000228302.2		12244751	12247845	-1	lncRNA	novel transcript	62.4699	0.273089	0.125184	0.0132085	0.0490927	93	127	122	98	116	136	103	121	84.1271	98.2227	115.619	98.4382	115.721	139.355	107.907	129.762	Up Regulated
ENSG00000279078	ENSG00000279078.1	SND1-IT1	127997597	128000077	1	lncRNA	SND1 intronic transcript 1 [Source:HGNC Symbol;Acc:HGNC:24158]	134.691	0.33587	0.174714	0.0133601	0.0495134	146	203	226	218	270	210	191	267	132.071	157.002	214.18	218.975	269.352	215.181	200.1	286.335	Up Regulated
ENSG00000286042	ENSG00000286042.1	LCAL1	79307669	79313384	-1	lncRNA	lung cancer associated lncRNA 1 [Source:HGNC Symbol;Acc:HGNC:25837]	117.662	0.31269	0.157271	0.0133843	0.0495645	175	150	193	216	206	202	212	229	158.304	116.011	182.906	216.966	205.505	206.983	222.101	245.583	Up Regulated
ENSG00000224152	ENSG00000224152.1	BAZ2B-AS1	159615292	159618637	1	lncRNA	BAZ2B antisense RNA 1 [Source:HGNC Symbol;Acc:HGNC:55862]	341.746	0.194954	0.0852076	0.0134015	0.0496063	363	507	399	378	426	461	426	349	328.367	392.117	378.131	379.69	424.977	472.373	446.297	374.273	Up Regulated
ENSG00000223891	ENSG00000223891.5	OSER1-DT	44210907	44226027	1	lncRNA	OSER1 divergent transcript [Source:HGNC Symbol;Acc:HGNC:48585]	68.3626	-0.322465	0.167176	0.013412	0.0496223	113	127	68	52	48	59	68	57	102.219	98.2227	64.4434	52.2325	47.8847	60.4555	71.2399	61.1277	Down Regulated
ENSG00000278434	ENSG00000278434.1		4532216	4533670	-1	lncRNA	novel transcript, sense intronic to CDIP1	20.8002	0.457039	0.278973	0.0134486	0.0497485	23	32	22	20	34	40	28	29	20.8056	24.749	20.8493	20.0894	33.9183	40.9868	29.3341	31.1	Up Regulated
ENSG00000268895	ENSG00000268895.5	A1BG-AS1	58347718	58355455	1	lncRNA	A1BG antisense RNA 1 [Source:HGNC Symbol;Acc:HGNC:37133]	110.8	0.34282	0.180532	0.0134974	0.0498835	91	115	62	79	109	119	90	90	82.318	88.9418	58.7572	79.3532	108.738	121.936	94.2881	96.5174	Up Regulated

## Sheet: dotA
ENSEMBL ID	ENSEMBL ID with Version	Gene name	Gene start(bp)	Gene end(bp)	Strand	Type	Gene Description	baseMean	log2FoldChange	lfcSE	pvalue	padj	Raw Mock1	Raw Mock2	Raw Mock3	Raw Mock4	Raw ΔdotA_A	Raw ΔdotA_B	Raw ΔdotA_C	Raw ΔdotA_D	Raw ΔdotA_D	Norm Mock2	Norm Mock3	Norm Mock4	Norm ΔdotA_A	ΔdotA_B	Norm ΔdotA_C	Norm ΔdotA_D	Up/Down Regulation
ENSG00000232973	ENSG00000232973.12	CYP1B1-AS1	38073447	38231651	1	lncRNA	CYP1B1 antisense RNA 1 [Source:HGNC Symbol;Acc:HGNC:28543]	51.7052	1.4091	0.232259	6.34e-11	3e-08	40	16	23	72	91	98	80	113	22.0604	16.8514	23.6335	71.401	80.0646	86.5133	95.7844	104.583	Up Regulated
ENSG00000203709	ENSG00000203709.11	MIR29B2CHG	207801518	207879115	-1	lncRNA	MIR29B2 and MIR29C host gene [Source:HGNC Symbol;Acc:HGNC:32018]	378.757	0.497364	0.0884186	2.36e-09	4.7e-07	425	254	301	320	492	424	354	403	234.392	267.516	309.291	317.338	432.877	374.303	423.846	372.982	Up Regulated
ENSG00000223745	ENSG00000223745.7	CCDC18-AS1	93262186	93346025	-1	lncRNA	CCDC18 antisense RNA 1 [Source:HGNC Symbol;Acc:HGNC:52262]	1733.96	0.404182	0.0722145	4.14e-09	6.95e-07	2984	1628	1760	2067	2577	2470	1857	3216	1645.71	1714.63	1808.48	2049.8	2267.32	2180.49	2223.4	2976.45	Up Regulated
ENSG00000286242	ENSG00000286242.1		102814252	102819881	1	lncRNA	novel transcript, antisense to UBE2D3	250.086	0.593436	0.109484	6.48e-09	9.75e-07	372	145	187	206	321	272	231	400	205.162	152.716	192.151	204.286	282.426	240.119	276.578	370.206	Up Regulated
ENSG00000255455	ENSG00000255455.2		130866254	130870247	-1	lncRNA	novel transcript	352.031	0.556607	0.103487	8.6e-09	1.19e-06	552	261	272	337	448	440	381	600	304.434	274.889	279.492	334.196	394.164	388.427	456.173	555.308	Up Regulated
ENSG00000235531	ENSG00000235531.9	MSC-AS1	71828167	72118393	1	lncRNA	MSC antisense RNA 1 [Source:HGNC Symbol;Acc:HGNC:48724]	1009.25	0.711998	0.135798	1.31e-08	1.57e-06	1337	575	519	1030	1154	1207	1021	1714	737.37	605.597	533.295	1021.43	1015.33	1065.53	1222.45	1586.33	Up Regulated
ENSG00000234380	ENSG00000234380.2	LINC01426	34745756	34784886	1	lncRNA	long intergenic non-protein coding RNA 1426 [Source:HGNC Symbol;Acc:HGNC:50734]	297.308	0.556714	0.105509	1.43e-08	1.66e-06	321	181	174	305	335	368	269	350	177.035	190.632	178.793	302.462	294.743	324.866	322.075	323.93	Up Regulated
ENSG00000271122	ENSG00000271122.1	HERPUD2-AS1	35695214	35699413	1	lncRNA	HERPUD2 antisense RNA 1 [Source:HGNC Symbol;Acc:HGNC:55258]	412.816	0.423101	0.0798817	1.93e-08	2.11e-06	788	434	357	545	673	686	496	704	434.591	457.094	366.833	540.466	592.126	605.593	593.864	651.562	Up Regulated
ENSG00000281649	ENSG00000281649.1	EBLN3P	37079645	37090928	1	lncRNA	endogenous Bornavirus like nucleoprotein 3, pseudogene [Source:HGNC Symbol;Acc:HGNC:50682]	2181.26	0.405505	0.0766296	2.26e-08	2.38e-06	3472	2014	2054	2576	2840	2951	2199	4236	1914.85	2121.17	2110.57	2554.57	2498.72	2605.11	2632.87	3920.48	Up Regulated
ENSG00000250033	ENSG00000250033.5	SLC7A11-AS1	138057464	138178177	1	lncRNA	SLC7A11 antisense RNA 1 [Source:HGNC Symbol;Acc:HGNC:44064]	208.171	1.36705	0.276684	3.85e-08	3.52e-06	76	25	31	152	130	169	124	299	41.9149	26.3303	31.8539	150.735	114.378	149.191	148.466	276.729	Up Regulated
ENSG00000285591	ENSG00000285591.1		8488420	8505027	1	lncRNA	novel transcript	47.2641	1.2403	0.247721	3.89e-08	3.54e-06	38	21	18	26	74	49	59	43	20.9574	22.1175	18.4958	25.7837	65.1075	43.2567	70.641	39.7971	Up Regulated
ENSG00000244879	ENSG00000244879.7	GABPB1-AS1	50354944	50372202	1	lncRNA	GABPB1 antisense RNA 1 [Source:HGNC Symbol;Acc:HGNC:44157]	1571.69	0.422584	0.0820167	4.5e-08	3.94e-06	2555	1127	1349	1664	2059	1916	1500	2550	1409.11	1186.97	1386.16	1650.16	1811.57	1691.42	1795.96	2360.06	Up Regulated
ENSG00000206417	ENSG00000206417.8	H1-10-AS1	129315392	129326225	1	lncRNA	H1-10 antisense RNA 1 [Source:HGNC Symbol;Acc:HGNC:27953]	27.7597	-1.25237	0.255104	6.03e-08	4.92e-06	77	42	42	35	28	20	13	7	42.4664	44.2349	43.1568	34.7088	24.6353	17.6558	15.565	6.4786	Down Regulated
ENSG00000264112	ENSG00000264112.1		57989039	57994850	-1	lncRNA	novel transcript	1106.28	0.463109	0.0917214	6.55e-08	5.24e-06	1485	805	989	1124	1406	1282	1025	1857	818.994	847.836	1016.24	1114.65	1237.04	1131.74	1227.24	1718.68	Up Regulated
ENSG00000269506	ENSG00000269506.2		54059597	54061210	1	lncRNA	novel transcript, antisense to CHIC2	194.472	0.801117	0.163692	6.8e-08	5.36e-06	160	104	106	137	184	188	158	300	88.2418	109.534	108.92	135.86	161.889	165.964	189.174	277.654	Up Regulated
ENSG00000253352	ENSG00000253352.9	TUG1	30969245	30979395	1	lncRNA	taurine up-regulated 1 [Source:HGNC Symbol;Acc:HGNC:26066]	5398.18	0.377121	0.0738505	6.97e-08	5.44e-06	9655	4505	4818	5658	6506	6754	5219	9928	5324.84	4744.72	4950.71	5610.93	5724.18	5962.36	6248.74	9188.5	Up Regulated
ENSG00000235522	ENSG00000235522.6		105846534	105857177	-1	lncRNA	novel transcript	162.374	0.779644	0.162294	8.08e-08	6.01e-06	83	78	80	63	132	96	103	165	45.7754	82.1506	82.2035	62.4758	116.138	84.7477	123.322	152.71	Up Regulated
ENSG00000258168	ENSG00000258168.5		70468080	70543040	1	lncRNA	novel transcript, antisense to PTPRB	1248.83	0.3642	0.071693	8.49e-08	6.07e-06	2083	1079	1159	1327	1677	1518	1187	2156	1148.8	1136.42	1190.92	1315.96	1475.48	1340.07	1421.2	1995.41	Up Regulated
ENSG00000250698	ENSG00000250698.1		140128015	140134565	1	lncRNA	novel transcript	38.3614	1.38625	0.290188	8.63e-08	6.15e-06	34	27	19	29	76	58	64	77	18.7514	28.4367	19.5233	28.7587	66.8672	51.2018	76.6276	71.2646	Up Regulated
ENSG00000238057	ENSG00000238057.9	ZEB2-AS1	144517978	144521477	1	lncRNA	ZEB2 antisense RNA 1 [Source:HGNC Symbol;Acc:HGNC:37149]	764.864	0.516586	0.104477	9.32e-08	6.56e-06	753	467	513	562	736	664	541	1098	415.288	491.85	527.13	557.324	647.556	586.172	647.742	1016.21	Up Regulated
ENSG00000231106	ENSG00000231106.2	LINC01436	36005137	36007838	1	lncRNA	long intergenic non-protein coding RNA 1436 [Source:HGNC Symbol;Acc:HGNC:50754]	208.413	0.51214	0.108369	2.9e-07	1.61e-05	364	150	183	273	364	341	238	309	200.75	157.982	188.04	270.729	320.259	301.031	284.959	285.984	Up Regulated
ENSG00000257176	ENSG00000257176.2		29277955	29317848	-1	lncRNA	novel transcript, antisense to FAR2	428.177	0.553377	0.120062	4.38e-07	2.14e-05	367	210	269	274	440	339	267	484	202.405	221.175	276.409	271.72	387.126	299.265	319.681	447.949	Up Regulated
ENSG00000279530	ENSG00000279530.2		70321542	70324274	-1	lncRNA	TEC	342.347	0.557615	0.121283	4.58e-07	2.23e-05	424	232	280	312	387	391	327	587	233.841	244.345	287.712	309.404	340.495	345.17	391.519	543.277	Up Regulated
ENSG00000260855	ENSG00000260855.1		246772301	246775772	1	lncRNA	novel transcript	146.87	0.639665	0.140311	4.78e-07	2.27e-05	158	74	76	98	162	131	113	169	87.1388	77.9378	78.0933	97.1846	142.533	115.645	135.296	156.412	Up Regulated
ENSG00000270195	ENSG00000270195.2	AC016773.1	1712821	1715945	1	lncRNA	novel transcript	24.6075	-1.40504	0.310948	4.84e-07	2.29e-05	97	25	42	23	20	21	9	5	53.4966	26.3303	43.1568	22.8086	17.5966	18.5386	10.7757	4.62757	Down Regulated
ENSG00000279348	ENSG00000279348.1		216211404	216213519	1	lncRNA	TEC	265.803	0.477793	0.104373	6.24e-07	2.8e-05	301	176	214	195	263	265	247	348	166.005	185.365	219.894	193.378	231.396	233.939	295.734	322.079	Up Regulated
ENSG00000266900	ENSG00000266900.1		62245810	62247412	1	lncRNA	novel transcript, sense intronic to KIAA1468	54.4246	1.13658	0.261401	8.81e-07	3.69e-05	54	38	34	45	86	63	79	131	29.7816	40.0221	34.9365	44.6256	75.6655	55.6157	94.5871	121.242	Up Regulated
ENSG00000255666	ENSG00000255666.6	LINC02700	94638045	94652884	1	lncRNA	long intergenic non-protein coding RNA 2700 [Source:HGNC Symbol;Acc:HGNC:54214]	268.272	0.553464	0.124424	8.83e-07	3.69e-05	238	229	182	275	399	324	263	309	131.26	241.186	187.013	272.712	351.053	286.024	314.891	285.984	Up Regulated
ENSG00000236581	ENSG00000236581.8	STARD13-AS	33180401	33281584	1	lncRNA	STARD13 antisense RNA [Source:HGNC Symbol;Acc:HGNC:40873]	1035.18	0.725722	0.165997	9.46e-07	3.85e-05	1182	575	710	763	1297	1005	1007	1619	651.886	605.597	729.556	756.652	1141.14	887.203	1205.69	1498.41	Up Regulated
ENSG00000247809	ENSG00000247809.7	NR2F2-AS1	96110040	96327361	-1	lncRNA	NR2F2 antisense RNA 1 [Source:HGNC Symbol;Acc:HGNC:44222]	99.9974	0.772508	0.1781	9.49e-07	3.85e-05	90	90	85	124	146	168	124	212	49.636	94.7892	87.3412	122.968	128.455	148.309	148.466	196.209	Up Regulated
ENSG00000176659	ENSG00000176659.8	LINC02910	60055853	60072956	1	lncRNA	long intergenic non-protein coding RNA 2910 [Source:HGNC Symbol;Acc:HGNC:26601]	281.625	0.566369	0.127928	9.75e-07	3.89e-05	495	433	365	587	759	648	556	704	272.998	456.041	375.053	582.116	667.792	572.047	665.702	651.562	Up Regulated
ENSG00000251562	ENSG00000251562.8	MALAT1	65497688	65506516	1	lncRNA	metastasis associated lung adenocarcinoma transcript 1 [Source:HGNC Symbol;Acc:HGNC:29665]	205455	0.794184	0.185123	1.25e-06	4.76e-05	164229	68637	84585	89662	118193	138388	128411	255820	90574.1	72289.4	86914.8	88916	103990	122167	153747	236765	Up Regulated
ENSG00000284977	ENSG00000284977.1		117759390	118306252	1	lncRNA	novel transcript	95.1487	0.75003	0.175183	1.38e-06	5.14e-05	104	47	70	51	92	96	98	133	57.3572	49.501	71.9281	50.5757	80.9445	84.7477	117.336	123.093	Up Regulated
ENSG00000253168	ENSG00000253168.1		17703988	17706187	1	lncRNA	novel transcript	46.4769	0.995129	0.237539	1.55e-06	5.62e-05	71	48	44	75	106	112	93	149	39.1573	50.5542	45.2119	74.376	93.2621	98.8724	111.349	137.902	Up Regulated
ENSG00000225334	ENSG00000225334.2	LINC02813	224766324	224779335	1	lncRNA	long intergenic non-protein coding RNA 2813 [Source:HGNC Symbol;Acc:HGNC:54345]	40.0182	1.03721	0.246378	1.59e-06	5.75e-05	21	13	14	22	41	37	27	32	11.5817	13.6918	14.3856	21.817	36.0731	32.6632	32.3272	29.6165	Up Regulated
ENSG00000242861	ENSG00000242861.1		225840883	225846522	-1	lncRNA	novel transcript	91.7734	0.644659	0.149721	1.67e-06	5.93e-05	97	82	74	76	118	134	89	141	53.4966	86.3635	76.0382	75.3677	103.82	118.294	106.56	130.497	Up Regulated
ENSG00000237491	ENSG00000237491.9	LINC01409	778747	810065	1	lncRNA	long intergenic non-protein coding RNA 1409 [Source:HGNC Symbol;Acc:HGNC:50701]	104.445	0.7158	0.168875	1.75e-06	6.16e-05	125	63	61	82	155	109	113	122	68.9389	66.3524	62.6802	81.3178	136.374	96.224	135.296	112.913	Up Regulated
ENSG00000259735	ENSG00000259735.1		59348648	59359889	-1	lncRNA	novel transcript, sense intronic to MYO1E	50.7148	1.12282	0.271739	1.78e-06	6.22e-05	22	18	22	33	60	39	41	65	12.1332	18.9578	22.606	32.7254	52.7899	34.4288	49.0895	60.1584	Up Regulated
ENSG00000214106	ENSG00000214106.8	PAXIP1-AS2	154928460	154952188	1	lncRNA	PAXIP1 antisense RNA 2 [Source:HGNC Symbol;Acc:HGNC:48958]	289.437	0.315981	0.0710545	2.42e-06	7.94e-05	533	288	298	348	412	415	322	488	293.955	303.325	306.208	345.105	362.49	366.357	385.532	451.651	Up Regulated
ENSG00000228804	ENSG00000228804.5		187702313	187733849	1	lncRNA	novel transcript, antisense to RTP2 and BCL6	37.0484	1.22626	0.301056	2.63e-06	8.41e-05	19	9	10	16	27	33	26	36	10.4787	9.47892	10.2754	15.8669	23.7554	29.132	31.1299	33.3185	Up Regulated
ENSG00000258044	ENSG00000258044.1		79823778	79825496	1	lncRNA	novel transcript, antisense to PPP1R12A	89.3807	0.657094	0.158006	2.78e-06	8.85e-05	132	71	89	72	155	140	68	175	72.7995	74.7781	91.4514	71.401	136.374	123.59	81.4168	161.965	Up Regulated
ENSG00000251034	ENSG00000251034.1		22481588	22553444	-1	lncRNA	novel transcript	128.607	0.703999	0.17153	2.98e-06	9.3e-05	137	107	112	176	229	165	177	266	75.557	112.694	115.085	174.536	201.481	145.66	211.923	246.187	Up Regulated
ENSG00000260920	ENSG00000260920.2		40464319	40466767	1	lncRNA	novel transcript, sense overlapping with ZNF643	1154.62	0.450682	0.105819	3.04e-06	9.48e-05	1092	779	638	962	1062	1143	800	1433	602.25	820.453	655.573	953.996	934.381	1009.03	957.844	1326.26	Up Regulated
ENSG00000279537	ENSG00000279537.1		40244925	40247366	1	lncRNA	TEC	48.4509	-0.943265	0.234738	3.49e-06	0.000104447	138	69	94	45	42	41	41	22	76.1085	72.6717	96.5891	44.6256	36.9529	36.1943	49.0895	20.3613	Down Regulated
ENSG00000271533	ENSG00000271533.1		74209976	74213660	-1	lncRNA	novel transcript, sense intronic FTX	750.097	0.552144	0.133983	4.08e-06	0.000117747	1071	470	575	611	864	786	668	1305	590.669	495.01	590.838	605.917	760.174	693.872	799.8	1207.8	Up Regulated
ENSG00000228878	ENSG00000228878.7	SEPTIN7-DT	35751856	35800949	-1	lncRNA	SEPTIN7 divergent transcript [Source:HGNC Symbol;Acc:HGNC:51153]	171.963	0.449439	0.10757	4.33e-06	0.000123867	290	164	158	236	303	218	201	338	159.938	172.727	162.352	234.036	266.589	192.448	240.658	312.824	Up Regulated
ENSG00000282859	ENSG00000282859.1		114560961	114561517	1	lncRNA	novel transcript, sense intronic to FOXP2	70.4578	0.808176	0.203895	4.51e-06	0.000127856	56	39	51	50	87	66	54	125	30.8846	41.0753	52.4047	49.584	76.5453	58.2641	64.6545	115.689	Up Regulated
ENSG00000280138	ENSG00000280138.1		122870059	122888720	-1	lncRNA	novel transcript	492.978	0.574207	0.140832	4.6e-06	0.000129498	520	268	275	324	526	450	390	522	286.786	282.261	282.575	321.304	462.791	397.255	466.949	483.118	Up Regulated
ENSG00000226876	ENSG00000226876.3	SMYD3-AS1	246108626	246113866	1	lncRNA	SMYD3 antisense RNA 1 [Source:HGNC Symbol;Acc:HGNC:40708]	235.813	0.790625	0.201794	5.04e-06	0.000138093	454	201	285	351	609	405	418	686	250.386	211.696	292.85	348.08	535.817	357.53	500.474	634.903	Up Regulated
ENSG00000279447	ENSG00000279447.1		23071547	23072722	-1	lncRNA	TEC	23.0391	1.08647	0.27849	5.17e-06	0.0001407	27	16	12	30	41	38	36	60	14.8908	16.8514	12.3305	29.7504	36.0731	33.546	43.103	55.5308	Up Regulated
ENSG00000262097	ENSG00000262097.1	LINC02185	14001198	14016056	-1	lncRNA	long intergenic non-protein coding RNA 2185 [Source:HGNC Symbol;Acc:HGNC:53047]	179.654	0.644507	0.16135	5.39e-06	0.000145677	280	238	236	341	387	430	341	507	154.423	250.665	242.5	338.163	340.495	379.599	408.281	469.236	Up Regulated
ENSG00000248360	ENSG00000248360.7	LINC00504	14470465	14888169	-1	lncRNA	long intergenic non-protein coding RNA 504 [Source:HGNC Symbol;Acc:HGNC:43555]	1377.47	0.459872	0.112458	6.12e-06	0.000160737	1298	1229	1055	1412	1487	1626	1240	2264	715.862	1294.4	1084.06	1400.25	1308.31	1435.41	1484.66	2095.36	Up Regulated
ENSG00000226674	ENSG00000226674.10	TEX41	144666312	145262988	1	lncRNA	testis expressed 41 [Source:HGNC Symbol;Acc:HGNC:48667]	1054.76	0.543413	0.134946	6.16e-06	0.000161176	1651	882	1103	1318	1573	1549	1217	2419	910.545	928.934	1133.38	1307.03	1383.97	1367.44	1457.12	2238.82	Up Regulated
ENSG00000286059	ENSG00000286059.1		233977872	233980018	-1	lncRNA	novel transcript, antisense to TRPM8	57.4851	0.942592	0.243272	6.16e-06	0.000161176	53	32	50	76	106	84	76	136	29.2301	33.7028	51.3772	75.3677	93.2621	74.1543	90.9952	125.87	Up Regulated
ENSG00000246273	ENSG00000246273.7	SBF2-AS1	9758268	9811335	1	lncRNA	SBF2 antisense RNA 1 [Source:HGNC Symbol;Acc:HGNC:27438]	224.758	0.393319	0.0949025	6.37e-06	0.000165797	398	216	230	312	347	404	243	395	219.501	227.494	236.335	309.404	305.301	356.647	290.945	365.578	Up Regulated
ENSG00000231329	ENSG00000231329.8		139144204	139239653	-1	lncRNA	novel transcript	362.971	0.596662	0.150079	6.51e-06	0.000167914	383	282	303	331	467	424	366	619	211.229	297.006	311.346	328.246	410.881	374.303	438.214	572.893	Up Regulated
ENSG00000279400	ENSG00000279400.1	AC008957.3	36667717	36669958	1	lncRNA	novel transcript	130.94	0.763316	0.195869	6.72e-06	0.00017208	125	61	71	96	128	131	133	166	68.9389	64.246	72.9556	95.2013	112.618	115.645	159.242	153.635	Up Regulated
ENSG00000204464	ENSG00000204464.7	TMEM51-AS2	15164344	15171317	-1	lncRNA	TMEM51 antisense RNA 2 [Source:HGNC Symbol;Acc:HGNC:32332]	64.0834	0.834836	0.216533	7.34e-06	0.000184696	59	37	42	47	96	73	53	96	32.5392	38.9689	43.1568	46.609	84.4638	64.4436	63.4572	88.8494	Up Regulated
ENSG00000245904	ENSG00000245904.3	BTG1-DT	92145573	92226557	1	lncRNA	BTG1 divergent transcript [Source:HGNC Symbol;Acc:HGNC:55600]	162.161	0.646546	0.165084	7.45e-06	0.000185825	225	151	122	250	289	283	223	321	124.09	159.035	125.36	247.92	254.271	249.829	266.999	297.09	Up Regulated
ENSG00000285704	ENSG00000285704.1		865288	867139	-1	lncRNA	novel transcript, antisense to WNK1	97.7576	0.749537	0.193417	7.58e-06	0.000188799	76	34	43	67	91	61	69	126	41.9149	35.8092	44.1844	66.4426	80.0646	53.8501	82.6141	116.615	Up Regulated
ENSG00000234361	ENSG00000234361.1		157829143	157830573	-1	lncRNA	novel transcript	67.2745	0.845964	0.221713	8.21e-06	0.000201549	55	30	34	62	84	46	75	105	30.3331	31.5964	34.9365	61.4842	73.9058	40.6083	89.7979	97.179	Up Regulated
ENSG00000253317	ENSG00000253317.1		72196334	72202269	1	lncRNA	novel transcript	109.379	0.740953	0.19311	9.21e-06	0.000218645	119	54	50	75	109	101	89	161	65.6298	56.8735	51.3772	74.376	95.9016	89.1617	106.56	149.008	Up Regulated
ENSG00000251003	ENSG00000251003.8	ZFPM2-AS1	105546089	106060524	-1	lncRNA	ZFPM2 antisense RNA 1 [Source:HGNC Symbol;Acc:HGNC:50698]	960.39	0.462865	0.116009	9.31e-06	0.000220519	1339	756	674	843	1039	1090	858	1550	738.474	796.229	692.564	835.986	914.144	962.24	1027.29	1434.55	Up Regulated
ENSG00000245688	ENSG00000245688.1		178438681	178443094	-1	lncRNA	novel transcript	163.312	0.885129	0.234903	9.85e-06	0.000230761	139	54	74	117	245	168	162	95	76.6601	56.8735	76.0382	116.027	215.559	148.309	193.963	87.9238	Up Regulated
ENSG00000279679	ENSG00000279679.1		143375628	143375883	-1	lncRNA	TEC	41.925	0.850077	0.226027	1.02e-05	0.000237198	59	14	27	26	48	40	37	86	32.5392	14.745	27.7437	25.7837	42.2319	35.3116	44.3003	79.5942	Up Regulated
ENSG00000221817	ENSG00000221817.9	PPP3CB-AS1	73495525	73520070	1	lncRNA	PPP3CB antisense RNA 1 (head to head) [Source:HGNC Symbol;Acc:HGNC:50750]	222.15	0.375531	0.091221	1.06e-05	0.000244928	365	154	197	248	296	265	203	357	201.302	162.195	202.426	245.937	260.43	233.939	243.053	330.409	Up Regulated
ENSG00000259188	ENSG00000259188.5		49877299	49883525	1	lncRNA	novel transcript, antisense to ATP8B4	324.221	0.515714	0.133722	1.28e-05	0.000281479	184	118	150	153	236	168	168	238	101.478	124.279	154.132	151.727	207.64	148.309	201.147	220.272	Up Regulated
ENSG00000177406	ENSG00000177406.4	NINJ2-AS1	630858	664196	1	lncRNA	NINJ2 antisense RNA 1 [Source:HGNC Symbol;Acc:HGNC:40405]	272.344	0.413819	0.104823	1.32e-05	0.000286222	414	246	251	388	456	428	305	416	228.326	259.09	257.913	384.772	401.203	377.834	365.178	385.014	Up Regulated
ENSG00000254911	ENSG00000254911.3	SCARNA9	93721513	93721865	1	lncRNA	small Cajal body-specific RNA 9 [Source:HGNC Symbol;Acc:HGNC:32566]	75.0576	0.97092	0.263644	1.4e-05	0.000301839	97	57	46	59	56	145	82	204	53.4966	60.0331	47.267	58.5091	49.2705	128.004	98.179	188.805	Up Regulated
ENSG00000228274	ENSG00000228274.3		38667585	38681860	-1	lncRNA	novel transcript, antisense to CBY1	77.2272	-0.640486	0.169624	1.41e-05	0.000304017	242	102	129	80	88	73	64	66	133.466	107.428	132.553	79.3344	77.4251	64.4436	76.6276	61.0839	Down Regulated
ENSG00000259248	ENSG00000259248.6	USP3-AS1	63544247	63601589	-1	lncRNA	USP3 antisense RNA 1 [Source:HGNC Symbol;Acc:HGNC:44140]	183.948	0.567667	0.149754	1.46e-05	0.000311119	213	152	181	182	252	212	192	373	117.472	160.088	185.985	180.486	221.717	187.151	229.883	345.217	Up Regulated
ENSG00000229956	ENSG00000229956.10	ZRANB2-DT	71081324	71489976	1	lncRNA	ZRANB2 divergent transcript [Source:HGNC Symbol;Acc:HGNC:43595]	129.025	0.614993	0.163181	1.51e-05	0.000319606	171	65	82	114	151	128	104	225	94.3084	68.4588	84.2586	113.052	132.854	112.997	124.52	208.241	Up Regulated
ENSG00000273271	ENSG00000273271.1		31666728	31667247	-1	lncRNA	novel transcript, antisense to SOD1	43.5744	0.85704	0.233725	1.59e-05	0.000335616	57	22	27	34	53	57	46	82	31.4361	23.1707	27.7437	33.7171	46.631	50.319	55.0761	75.8922	Up Regulated
ENSG00000278600	ENSG00000278600.1		79920195	79922455	-1	lncRNA	novel transcript, sense intronic to ST20	398.574	0.41283	0.105907	1.61e-05	0.000339226	558	418	368	462	545	547	444	706	307.743	440.243	378.136	458.156	479.508	482.886	531.604	653.413	Up Regulated
ENSG00000270069	ENSG00000270069.1	MIR222HG	45745210	45770274	-1	lncRNA	miR222/221 cluster host gene [Source:HGNC Symbol;Acc:HGNC:49555]	1547.16	0.451327	0.117274	1.73e-05	0.000358133	1536	876	806	987	1167	1296	960	1846	847.121	922.614	828.2	978.788	1026.76	1144.09	1149.41	1708.5	Up Regulated
ENSG00000279166	ENSG00000279166.1		144494265	144496878	-1	lncRNA	TEC	2762.3	0.444764	0.115552	1.77e-05	0.000364693	2459	1053	1583	1461	2029	1862	1531	2693	1356.17	1109.03	1626.6	1448.84	1785.18	1643.75	1833.07	2492.41	Up Regulated
ENSG00000281398	ENSG00000281398.4	SNHG4	139274102	139284899	1	lncRNA	small nucleolar RNA host gene 4 [Source:HGNC Symbol;Acc:HGNC:32964]	546.455	0.370539	0.0947506	1.88e-05	0.000379839	710	455	379	588	627	689	505	710	391.573	479.212	389.439	583.108	551.654	608.242	604.639	657.115	Up Regulated
ENSG00000251209	ENSG00000251209.8	LINC00923	97572185	97875650	-1	lncRNA	long intergenic non-protein coding RNA 923 [Source:HGNC Symbol;Acc:HGNC:28088]	276.986	0.458589	0.119948	1.9e-05	0.000382019	570	216	278	314	490	385	332	486	314.361	227.494	285.657	311.388	431.117	339.874	397.505	449.8	Up Regulated
ENSG00000224138	ENSG00000224138.1		127350128	127351523	1	lncRNA	novel transcript	69.1131	0.629807	0.170407	1.9e-05	0.00038271	75	38	44	49	70	64	66	95	41.3633	40.0221	45.2119	48.5923	61.5882	56.4985	79.0222	87.9238	Up Regulated
ENSG00000238113	ENSG00000238113.6	LINC01410	62801461	62813486	1	lncRNA	long intergenic non-protein coding RNA 1410 [Source:HGNC Symbol;Acc:HGNC:50702]	766.576	0.376528	0.0988965	2.1e-05	0.00041422	1510	958	928	1171	1441	1317	1030	1725	832.782	1008.98	953.561	1161.26	1267.84	1162.63	1233.22	1596.51	Up Regulated
ENSG00000250102	ENSG00000250102.5	LINC02377	131379717	131591825	1	lncRNA	long intergenic non-protein coding RNA 2377 [Source:HGNC Symbol;Acc:HGNC:53300]	84.8126	0.654821	0.18032	2.13e-05	0.00041625	49	45	49	81	107	94	60	83	27.024	47.3946	50.3496	80.3261	94.1419	82.9822	71.8383	76.8177	Up Regulated
ENSG00000224093	ENSG00000224093.5	BCAR3-AS1	93591966	93610605	1	lncRNA	BCAR3 antisense RNA 1 [Source:HGNC Symbol;Acc:HGNC:40093]	97.9535	0.651447	0.178961	2.15e-05	0.000418089	124	70	105	84	174	124	146	121	68.3874	73.7249	107.892	83.3011	153.091	109.466	174.807	111.987	Up Regulated
ENSG00000258337	ENSG00000258337.1		116174502	116181295	-1	lncRNA	novel transcript, sense intronic to MED13L	62.8343	0.921074	0.263325	2.17e-05	0.00042287	31	28	31	38	58	42	46	98	17.0968	29.49	31.8539	37.6838	51.0302	37.0771	55.0761	90.7004	Up Regulated
ENSG00000247774	ENSG00000247774.6	PCED1B-AS1	47205893	47216487	-1	lncRNA	PCED1B antisense RNA 1 [Source:HGNC Symbol;Acc:HGNC:44166]	473.502	-0.53992	0.145806	2.3e-05	0.000441116	1157	664	581	421	451	509	332	335	638.098	699.333	597.003	417.497	396.804	449.34	397.505	310.047	Down Regulated
ENSG00000286153	ENSG00000286153.1		34836286	34884882	1	lncRNA	novel transcript, antisense to RUNX1	540.928	0.461296	0.123383	2.55e-05	0.000476453	645	396	421	508	733	621	455	735	355.725	417.072	432.596	503.773	644.916	548.212	544.774	680.253	Up Regulated
ENSG00000279811	ENSG00000279811.1		77002849	77006846	-1	lncRNA	TEC	146.483	0.533548	0.145185	2.56e-05	0.000477516	156	89	90	137	216	181	122	121	86.0357	93.7359	92.4789	135.86	190.044	159.785	146.071	111.987	Up Regulated
ENSG00000227598	ENSG00000227598.1		166969626	166999065	-1	lncRNA	novel transcript	45.064	-0.844882	0.237651	2.68e-05	0.00049309	92	33	46	36	40	22	14	17	50.739	34.756	47.267	35.7005	35.1932	19.4214	16.7623	15.7337	Down Regulated
ENSG00000235897	ENSG00000235897.1	TM4SF19-AS1	196318330	196325570	1	lncRNA	TM4SF19 antisense RNA 1 [Source:HGNC Symbol;Acc:HGNC:41085]	163.351	0.637432	0.178194	2.71e-05	0.000497883	106	141	116	185	228	227	183	217	58.4602	148.503	119.195	183.461	200.601	200.393	219.107	200.837	Up Regulated
ENSG00000203395	ENSG00000203395.2		68361214	68365584	-1	lncRNA	novel transcript, antisense to PLEK	112.284	0.841007	0.241207	2.85e-05	0.000515466	31	26	20	40	48	56	43	58	17.0968	27.3835	20.5509	39.6672	42.2319	49.4362	51.4841	53.6798	Up Regulated
ENSG00000285875	ENSG00000285875.1	AL035446.2	140575788	140898381	-1	lncRNA	novel transcript	520.18	0.317773	0.0824207	3.11e-05	0.000552853	837	527	466	586	700	682	516	845	461.615	555.043	478.835	581.125	615.882	602.062	617.81	782.059	Up Regulated
ENSG00000230590	ENSG00000230590.10	FTX	73940435	74293574	-1	lncRNA	FTX transcript, XIST regulator [Source:HGNC Symbol;Acc:HGNC:37190]	3095.23	0.389559	0.103601	3.19e-05	0.000563359	4563	2148	2666	2969	3768	3274	2726	4931	2516.55	2262.3	2739.43	2944.3	3315.2	2890.25	3263.85	4563.71	Up Regulated
ENSG00000283994	ENSG00000283994.1		143601517	143608759	1	lncRNA	novel transcript, sense intronic to ARHGAP15	93.894	0.626086	0.176407	3.25e-05	0.000572327	88	47	75	47	103	79	66	126	48.533	49.501	77.0658	46.609	90.6226	69.7403	79.0222	116.615	Up Regulated
ENSG00000251632	ENSG00000251632.1	LINC02172	137545731	137603430	1	lncRNA	long intergenic non-protein coding RNA 2172 [Source:HGNC Symbol;Acc:HGNC:53034]	62.9434	0.771792	0.223188	3.35e-05	0.00058605	44	36	36	54	41	75	68	98	24.2665	37.9157	36.9916	53.5507	36.0731	66.2092	81.4168	90.7004	Up Regulated
ENSG00000233725	ENSG00000233725.7	NRAD1	43908669	44030461	1	lncRNA	non-coding RNA in the aldehyde dehydrogenase 1A pathway [Source:HGNC Symbol;Acc:HGNC:26981]	13.6747	1.41232	0.416096	3.43e-05	0.000595696	10	8	4	8	18	18	22	23	5.51511	8.4257	4.11017	7.93344	15.837	15.8902	26.3407	21.2868	Up Regulated
ENSG00000259590	ENSG00000259590.1	LINC02244	99395179	99396593	-1	lncRNA	long intergenic non-protein coding RNA 2244 [Source:HGNC Symbol;Acc:HGNC:53929]	43.5209	0.863703	0.251226	3.47e-05	0.000599548	29	27	17	24	45	43	34	50	15.9938	28.4367	17.4682	23.8003	39.5924	37.9599	40.7084	46.2757	Up Regulated
ENSG00000267270	ENSG00000267270.5	PARD6G-AS1	80147908	80179839	1	lncRNA	PARD6G antisense RNA 1 [Source:HGNC Symbol;Acc:HGNC:44109]	108.903	-0.627752	0.172614	3.48e-05	0.000600608	252	73	111	65	86	81	52	43	138.981	76.8845	114.057	64.4592	75.6655	71.5059	62.2599	39.7971	Down Regulated
ENSG00000237845	ENSG00000237845.1		235942553	235943805	-1	lncRNA	novel transcript	20.7906	0.964993	0.283723	3.53e-05	0.00060504	10	15	18	20	33	43	22	26	5.51511	15.7982	18.4958	19.8336	29.0344	37.9599	26.3407	24.0634	Up Regulated
ENSG00000223911	ENSG00000223911.1		147899401	147902956	-1	lncRNA	novel transcript	28.8734	1.11435	0.33197	3.54e-05	0.00060504	14	18	9	34	36	30	38	64	7.72116	18.9578	9.24789	33.7171	31.6739	26.4837	45.4976	59.2329	Up Regulated
ENSG00000235652	ENSG00000235652.7	EPM2A-DT	145799409	145887430	1	lncRNA	EPM2A divergent transcript [Source:HGNC Symbol;Acc:HGNC:48990]	311.105	0.408657	0.110383	3.61e-05	0.000615459	435	276	300	289	455	348	288	509	239.907	290.687	308.263	286.596	400.323	307.211	344.824	471.087	Up Regulated
ENSG00000270077	ENSG00000270077.1		97144170	97144723	1	lncRNA	novel transcript, sense intronic to PGCP	104.743	0.676429	0.194365	3.79e-05	0.000641508	124	65	83	108	142	136	107	196	68.3874	68.4588	85.2861	107.101	124.936	120.059	128.112	181.401	Up Regulated
ENSG00000277684	ENSG00000277684.1		48340797	48341330	-1	lncRNA	novel transcript, antisense to RB1	17.8734	1.06101	0.314026	3.84e-05	0.000646642	16	10	10	21	30	24	20	45	8.82418	10.5321	10.2754	20.8253	26.3949	21.1869	23.9461	41.6481	Up Regulated
ENSG00000215068	ENSG00000215068.7	ANXA2R-AS1	43041572	43064272	1	lncRNA	ANXA2R antisense RNA 1 [Source:HGNC Symbol;Acc:HGNC:27208]	890.705	-0.391942	0.105789	4e-05	0.000668104	1293	452	585	525	562	536	369	340	713.104	476.052	601.113	520.632	494.465	473.175	441.806	314.675	Down Regulated
ENSG00000253123	ENSG00000253123.3		37326575	37331991	-1	lncRNA	novel transcript	260.949	0.573364	0.163036	4.13e-05	0.000682669	395	271	215	484	531	582	435	400	217.847	285.421	220.922	479.973	467.19	513.783	520.828	370.206	Up Regulated
ENSG00000237803	ENSG00000237803.5	LINC00211	37820498	37876274	-1	lncRNA	long intergenic non-protein coding RNA 211 [Source:HGNC Symbol;Acc:HGNC:37459]	16.8248	1.17058	0.353236	4.18e-05	0.000689511	7	14	8	19	38	37	15	25	3.86058	14.745	8.22035	18.8419	33.4336	32.6632	17.9596	23.1379	Up Regulated
ENSG00000249171	ENSG00000249171.1		83668510	83731755	-1	lncRNA	novel transcript	12.9588	1.17644	0.350833	4.28e-05	0.00070291	14	3	6	19	16	28	17	34	7.72116	3.15964	6.16526	18.8419	14.0773	24.7181	20.3542	31.4675	Up Regulated
ENSG00000239665	ENSG00000239665.8	AL157392.3	13631143	13668445	1	lncRNA	novel transcript	632.048	0.43228	0.119244	4.42e-05	0.000721713	541	279	300	432	583	469	387	490	298.368	293.846	308.263	428.406	512.942	414.028	463.357	453.502	Up Regulated
ENSG00000274561	ENSG00000274561.1		68131462	68131907	1	lncRNA	novel transcript	43.5998	0.59086	0.169306	4.47e-05	0.000726074	70	44	37	50	67	66	58	91	38.6058	46.3414	38.0191	49.584	58.9487	58.2641	69.4437	84.2218	Up Regulated
ENSG00000224897	ENSG00000224897.7	POT1-AS1	124929873	125482966	1	lncRNA	POT1 antisense RNA 1 [Source:HGNC Symbol;Acc:HGNC:49459]	65.4417	0.614175	0.178059	4.69e-05	0.000754819	88	64	55	97	104	109	85	148	48.533	67.4056	56.5149	96.193	91.5024	96.224	101.771	136.976	Up Regulated
ENSG00000254876	ENSG00000254876.5	SUGT1P4-STRA6LP	97238449	97297314	1	lncRNA	SUGT1P4-STRA6LP readthrough [Source:HGNC Symbol;Acc:HGNC:53834]	31.2852	0.767516	0.226956	5.01e-05	0.00079514	54	28	23	25	57	48	43	60	29.7816	29.49	23.6335	24.792	50.1504	42.3739	51.4841	55.5308	Up Regulated
ENSG00000268895	ENSG00000268895.5	A1BG-AS1	58347718	58355455	1	lncRNA	A1BG antisense RNA 1 [Source:HGNC Symbol;Acc:HGNC:37133]	110.8	-0.63172	0.183893	5.06e-05	0.000799714	258	93	133	130	115	111	75	23	142.29	97.9488	136.663	128.918	101.181	97.9896	89.7979	21.2868	Down Regulated
ENSG00000226522	ENSG00000226522.1	HDAC9-AS1	18892096	18899433	-1	lncRNA	HDAC9 antisense RNA 1 [Source:HGNC Symbol;Acc:HGNC:40664]	79.5286	0.756284	0.22513	5.29e-05	0.000831424	74	45	67	56	97	76	69	157	40.8118	47.3946	68.8454	55.5341	85.3436	67.092	82.6141	145.306	Up Regulated
ENSG00000231079	ENSG00000231079.7	KIF5C-AS1	148866470	148888823	-1	lncRNA	KIF5C antisense RNA 1 [Source:HGNC Symbol;Acc:HGNC:40325]	15.9217	0.931327	0.282381	5.45e-05	0.000850013	21	10	21	24	42	49	21	33	11.5817	10.5321	21.5784	23.8003	36.9529	43.2567	25.1434	30.542	Up Regulated
ENSG00000255517	ENSG00000255517.6	DPP3-DT	66473490	66480296	-1	lncRNA	DPP3 divergent transcript [Source:HGNC Symbol;Acc:HGNC:55494]	129.336	-0.669411	0.197732	5.49e-05	0.000855021	460	166	218	151	147	168	130	48	253.695	174.833	224.005	149.744	129.335	148.309	155.65	44.4247	Down Regulated
ENSG00000285999	ENSG00000285999.1		66085405	66093937	1	lncRNA	novel transcipt	183.343	0.54591	0.159058	5.82e-05	0.000900841	131	117	145	122	191	147	132	262	72.248	123.226	148.994	120.985	168.048	129.77	158.044	242.485	Up Regulated
ENSG00000233178	ENSG00000233178.7		68393881	68406500	-1	lncRNA	novel transcript, antisense to PGM5	39.7575	0.677636	0.200998	5.89e-05	0.000910562	53	23	37	26	46	54	39	70	29.2301	24.2239	38.0191	25.7837	40.4722	47.6706	46.6949	64.786	Up Regulated
ENSG00000231652	ENSG00000231652.2	CD109-AS1	73693903	73696131	-1	lncRNA	CD109 antisense RNA 1 [Source:HGNC Symbol;Acc:HGNC:55765]	47.1655	0.715317	0.214771	5.91e-05	0.000912469	66	42	55	60	116	66	71	103	36.3997	44.2349	56.5149	59.5008	102.06	58.2641	85.0087	95.328	Up Regulated
ENSG00000250748	ENSG00000250748.6	MSRB3-AS1	65466820	65642372	-1	lncRNA	MSRB3 antisense RNA 1 [Source:HGNC Symbol;Acc:HGNC:53386]	48.4001	0.871888	0.266942	6.02e-05	0.000925881	16	45	17	40	59	48	49	67	8.82418	47.3946	17.4682	39.6672	51.91	42.3739	58.668	62.0094	Up Regulated
ENSG00000257747	ENSG00000257747.1	LINC02426	81953719	81993136	1	lncRNA	long intergenic non-protein coding RNA 2426 [Source:HGNC Symbol;Acc:HGNC:53357]	11.8408	2.48049	0.755043	6.49e-05	0.000980579	0	1	0	5	9	8	14	9	0	1.05321	0	4.9584	7.91848	7.06231	16.7623	8.32963	Up Regulated
ENSG00000260742	ENSG00000260742.1	ITPRID2-DT	181887851	181891663	-1	lncRNA	ITPRID2 divergent transcript [Source:HGNC Symbol;Acc:HGNC:55386]	52.5211	0.652078	0.196651	6.94e-05	0.00103049	63	50	34	72	88	63	62	119	34.7452	52.6606	34.9365	71.401	77.4251	55.6157	74.2329	110.136	Up Regulated
ENSG00000277007	ENSG00000277007.1		219270774	219273387	1	lncRNA	novel transcript	120.399	0.530948	0.155981	6.95e-05	0.00103234	146	97	94	94	148	145	119	171	80.5206	102.162	96.5891	93.2179	130.215	128.004	142.479	158.263	Up Regulated
ENSG00000250659	ENSG00000250659.2		62537312	62542018	1	lncRNA	novel transcript	58.5518	-0.747029	0.22562	7.01e-05	0.00103663	131	58	82	44	43	47	34	28	72.248	61.0863	84.2586	43.6339	37.8327	41.4911	40.7084	25.9144	Down Regulated
ENSG00000229422	ENSG00000229422.2		62837139	62838302	-1	lncRNA	novel transcript	32.9797	-0.975656	0.301306	7.02e-05	0.00103663	116	40	38	46	28	39	12	15	63.9753	42.1285	39.0467	45.6173	24.6353	34.4288	14.3677	13.8827	Down Regulated
ENSG00000279159	ENSG00000279159.1		29978950	30028236	-1	lncRNA	novel transcript, antisense to MTMR3	865.551	0.390559	0.109928	7.09e-05	0.00104643	1386	497	621	727	1025	834	665	1229	764.395	523.447	638.105	720.951	901.827	736.246	796.208	1137.46	Up Regulated
ENSG00000279236	ENSG00000279236.1		62551203	62552505	1	lncRNA	novel transcript	56.4153	0.899098	0.282307	7.29e-05	0.00106334	28	36	27	41	57	48	65	80	15.4423	37.9157	27.7437	40.6589	50.1504	42.3739	77.8249	74.0411	Up Regulated
ENSG00000254635	ENSG00000254635.5	WAC-AS1	28522652	28533066	-1	lncRNA	WAC antisense RNA 1 (head to head) [Source:HGNC Symbol;Acc:HGNC:27347]	795.909	0.263016	0.0707226	7.48e-05	0.00108051	1653	783	794	1043	1128	1269	800	1385	911.648	824.666	815.87	1034.32	992.449	1120.26	957.844	1281.84	Up Regulated
ENSG00000274026	ENSG00000274026.2	FAM27E3	67717411	67719178	-1	lncRNA	family with sequence similarity 27 member E3 [Source:HGNC Symbol;Acc:HGNC:28655]	47.6784	-0.928736	0.288907	7.57e-05	0.00108953	127	52	54	31	40	30	17	20	70.0419	54.7671	55.4874	30.7421	35.1932	26.4837	20.3542	18.5103	Down Regulated
ENSG00000246263	ENSG00000246263.2	UBR5-DT	102239386	102253750	1	lncRNA	UBR5 divergent transcript [Source:HGNC Symbol;Acc:HGNC:51661]	73.5709	0.496948	0.146488	8.27e-05	0.00116394	147	53	51	101	118	124	75	137	81.0721	55.8203	52.4047	100.16	103.82	109.466	89.7979	126.795	Up Regulated
ENSG00000279862	ENSG00000279862.1		172301654	172303052	-1	lncRNA	novel transcript	244.838	0.556027	0.166707	8.29e-05	0.00116394	282	151	199	190	278	237	238	381	155.526	159.035	204.481	188.419	244.593	209.221	284.959	352.621	Up Regulated
ENSG00000272316	ENSG00000272316.1		57908560	57913911	-1	lncRNA	novel transcript	187.588	0.414076	0.119225	8.48e-05	0.00118488	377	178	199	232	303	254	231	404	207.92	187.472	204.481	230.07	266.589	224.228	276.578	373.908	Up Regulated
ENSG00000278922	ENSG00000278922.1		30526918	30528294	1	lncRNA	novel transcript	31.9127	-1.01089	0.321468	8.79e-05	0.00121559	85	39	44	33	16	37	19	5	46.8785	41.0753	45.2119	32.7254	14.0773	32.6632	22.7488	4.62757	Down Regulated
ENSG00000247092	ENSG00000247092.6	SNHG10	95521943	95534889	-1	lncRNA	small nucleolar RNA host gene 10 [Source:HGNC Symbol;Acc:HGNC:27510]	227.931	-0.381535	0.109067	8.91e-05	0.00122828	427	260	252	212	223	229	168	141	235.495	273.835	258.941	210.236	196.202	202.159	201.147	130.497	Down Regulated
ENSG00000259488	ENSG00000259488.2	DUT-AS1	48312353	48331856	-1	lncRNA	DUT antisense RNA 1 [Source:HGNC Symbol;Acc:HGNC:55420]	77.5165	-0.584254	0.17636	9.16e-05	0.00124505	159	59	75	60	52	55	32	54	87.6903	62.1396	77.0658	59.5008	45.7512	48.5534	38.3138	49.9778	Down Regulated
ENSG00000229852	ENSG00000229852.2	KHDC1-AS1	73263212	73301789	1	lncRNA	KHDC1 antisense RNA 1 [Source:HGNC Symbol;Acc:HGNC:55468]	141.728	-0.511425	0.150748	9.41e-05	0.00127391	320	96	182	112	99	104	84	122	176.484	101.108	187.013	111.068	87.1033	91.8101	100.574	112.913	Down Regulated
ENSG00000260034	ENSG00000260034.1	LCMT1-AS2	25140577	25149032	-1	lncRNA	LCMT1 antisense RNA 2 [Source:HGNC Symbol;Acc:HGNC:51178]	126.809	0.512902	0.15406	9.69e-05	0.00129806	133	62	99	77	131	115	96	150	73.351	65.2992	101.727	76.3594	115.258	101.521	114.941	138.827	Up Regulated
ENSG00000224078	ENSG00000224078.14	SNHG14	24978583	25420336	1	lncRNA	small nucleolar RNA host gene 14 [Source:HGNC Symbol;Acc:HGNC:37462]	4264.13	0.317587	0.0892603	0.00010008	0.00133038	5745	2719	3134	3412	4342	3742	3021	5729	3168.43	2863.69	3220.32	3383.61	3820.23	3303.4	3617.06	5302.27	Up Regulated
ENSG00000271781	ENSG00000271781.1		675826	676616	1	lncRNA	novel transcript, antisense to TPPP	31.9862	-1.17853	0.37379	0.000101236	0.00134136	32	18	22	5	9	8	9	0	17.6484	18.9578	22.606	4.9584	7.91848	7.06231	10.7757	0	Down Regulated
ENSG00000247828	ENSG00000247828.7	TMEM161B-DT	88268864	88439337	1	lncRNA	TMEM161B divergent transcript [Source:HGNC Symbol;Acc:HGNC:43839]	596.362	0.355319	0.102164	0.000109619	0.00142638	976	488	560	654	775	773	571	1005	538.275	513.968	575.424	648.559	681.869	682.396	683.661	930.142	Up Regulated
ENSG00000233061	ENSG00000233061.1	TTLL7-IT1	83979118	83984300	-1	lncRNA	TTLL7 intronic transcript 1 [Source:HGNC Symbol;Acc:HGNC:41486]	29.6028	-0.908546	0.293092	0.000114181	0.00146324	99	32	58	13	19	22	17	24	54.5996	33.7028	59.5975	12.8918	16.7168	19.4214	20.3542	22.2123	Down Regulated
ENSG00000230551	ENSG00000230551.4		149494314	149504670	-1	lncRNA	novel transcript	1771.89	0.293458	0.0824645	0.000114462	0.00146593	2970	1567	1729	1907	2342	2028	1690	3007	1637.99	1650.38	1776.62	1891.13	2060.56	1790.3	2023.45	2783.02	Up Regulated
ENSG00000236008	ENSG00000236008.2	LINC01814	8461703	8592903	-1	lncRNA	long intergenic non-protein coding RNA 1814 [Source:HGNC Symbol;Acc:HGNC:52618]	354.601	0.487134	0.147791	0.000117396	0.00149153	454	273	250	442	573	487	401	416	250.386	287.527	256.886	438.323	504.143	429.918	480.12	385.014	Up Regulated
ENSG00000261468	ENSG00000261468.1		30697661	30699576	1	lncRNA	novel transcript	85.8246	0.624658	0.19783	0.000125195	0.0015707	104	97	76	87	124	143	98	186	57.3572	102.162	78.0933	86.2762	109.099	126.239	117.336	172.146	Up Regulated
ENSG00000226771	ENSG00000226771.1		21223295	21226829	-1	lncRNA	novel transcript	14.4205	1.72036	0.565682	0.000129525	0.00161306	2	3	5	2	7	15	3	20	1.10302	3.15964	5.13772	1.98336	6.15882	13.2418	3.59192	18.5103	Up Regulated
ENSG00000245532	ENSG00000245532.8	NEAT1	65422774	65445540	1	lncRNA	nuclear paraspeckle assembly transcript 1 [Source:HGNC Symbol;Acc:HGNC:30815]	50730.8	0.458583	0.139106	0.000131389	0.00163228	64143	22424	23736	30110	48771	33899	35091	50814	35375.6	23617.2	24389.8	29859.5	42910.2	29925.7	42014.6	47029.1	Up Regulated
ENSG00000253671	ENSG00000253671.2		17808361	17822183	1	lncRNA	novel transcript	566.202	0.460083	0.13972	0.000132067	0.00163853	1383	863	832	1172	1411	1327	1065	1713	762.74	908.923	854.916	1162.25	1241.44	1171.46	1275.13	1585.41	Up Regulated
ENSG00000260948	ENSG00000260948.1		111431046	111433068	-1	lncRNA	novel transcript, sense overlapping WDR77 & OVGP1	70.6686	0.610462	0.194197	0.000140744	0.00171906	128	73	63	86	113	114	83	197	70.5934	76.8845	64.7353	85.2845	99.4209	100.638	99.3764	182.326	Up Regulated
ENSG00000236204	ENSG00000236204.6	LINC01376	18986451	19348067	-1	lncRNA	long intergenic non-protein coding RNA 1376 [Source:HGNC Symbol;Acc:HGNC:50637]	74.5241	0.513328	0.159938	0.000142885	0.00173811	99	64	69	90	123	104	78	131	54.5996	67.4056	70.9005	89.2512	108.219	91.8101	93.3898	121.242	Up Regulated
ENSG00000284930	ENSG00000284930.1		73458850	73466167	-1	lncRNA	novel transcript	71.8928	0.72654	0.238479	0.000143096	0.00173837	43	57	38	73	90	104	72	91	23.715	60.0331	39.0467	72.3926	79.1848	91.8101	86.206	84.2218	Up Regulated
ENSG00000271882	ENSG00000271882.1		101208148	101208558	1	lncRNA	novel transcript	99.309	0.481762	0.148531	0.000143993	0.00174718	108	67	60	69	93	92	80	128	59.5632	70.5653	61.6526	68.4259	81.8243	81.2166	95.7844	118.466	Up Regulated
ENSG00000238280	ENSG00000238280.2		62682652	62805887	-1	lncRNA	novel transcript	30.5556	0.85955	0.286	0.000147526	0.00177672	21	16	11	31	41	33	25	45	11.5817	16.8514	11.303	30.7421	36.0731	29.132	29.9326	41.6481	Up Regulated
ENSG00000267734	ENSG00000267734.1		86932199	86934891	-1	lncRNA	novel transcript, antisense to HS2ST1	78.6902	0.758123	0.25122	0.000150683	0.0018004	43	33	60	74	111	85	70	100	23.715	34.756	61.6526	73.3843	97.6612	75.0371	83.8114	92.5514	Up Regulated
ENSG00000254934	ENSG00000254934.5	LINC00678	27617626	27634627	-1	lncRNA	long intergenic non-protein coding RNA 678 [Source:HGNC Symbol;Acc:HGNC:44413]	12.5609	1.56178	0.525664	0.000153425	0.00182564	3	1	5	6	17	9	8	15	1.65453	1.05321	5.13772	5.95008	14.9571	7.9451	9.57844	13.8827	Up Regulated
ENSG00000233355	ENSG00000233355.7	CHRM3-AS2	239703381	239770130	-1	lncRNA	CHRM3 antisense RNA 2 [Source:HGNC Symbol;Acc:HGNC:43725]	575.43	0.662194	0.215692	0.000156431	0.00185057	417	380	362	435	775	477	544	733	229.98	400.221	371.971	431.381	681.869	421.09	651.334	678.402	Up Regulated
ENSG00000267751	ENSG00000267751.5	BSG-AS1	562360	572228	-1	lncRNA	BSG antisense RNA 1 [Source:HGNC Symbol;Acc:HGNC:55286]	48.3887	-0.630908	0.202124	0.000156595	0.00185144	103	34	54	42	39	38	30	15	56.8057	35.8092	55.4874	41.6506	34.3134	33.546	35.9192	13.8827	Down Regulated
ENSG00000261840	ENSG00000261840.2		30697704	30699058	-1	lncRNA	novel transcript, antisense to SRCAP	22.8201	-1.0657	0.357086	0.000162631	0.00190541	68	19	24	19	15	20	6	5	37.5028	20.011	24.661	18.8419	13.1975	17.6558	7.18383	4.62757	Down Regulated
ENSG00000279579	ENSG00000279579.3	LINC01666	8759077	8761335	1	lncRNA	long intergenic non-protein coding RNA 1666 [Source:HGNC Symbol;Acc:HGNC:52454]	19.7167	-0.963996	0.324688	0.000168947	0.00195982	52	31	31	18	20	18	10	5	28.6786	32.6496	31.8539	17.8502	17.5966	15.8902	11.9731	4.62757	Down Regulated
ENSG00000267724	ENSG00000267724.1		47105946	47108062	1	lncRNA	novel transcript, antisense to HDHD2	80.0179	0.553938	0.177341	0.000173934	0.00200736	97	39	55	76	91	88	65	124	53.4966	41.0753	56.5149	75.3677	80.0646	77.6854	77.8249	114.764	Up Regulated
ENSG00000268670	ENSG00000268670.1		4061615	4062749	-1	lncRNA	novel transcript, sense intronic to ZBTB7A	68.6115	-0.723678	0.234317	0.000174863	0.00201264	122	50	75	65	49	55	46	3	67.2844	52.6606	77.0658	64.4592	43.1117	48.5534	55.0761	2.77654	Down Regulated
ENSG00000229463	ENSG00000229463.2	LYST-AS1	235839483	235840182	1	lncRNA	LYST antisense RNA 1 [Source:HGNC Symbol;Acc:HGNC:41320]	161.688	0.597509	0.195201	0.000177934	0.00203528	79	60	85	110	134	113	105	148	43.5694	63.1928	87.3412	109.085	117.897	99.7552	125.717	136.976	Up Regulated
ENSG00000249175	ENSG00000249175.1		94788789	94793599	1	lncRNA	novel transcript	24.6489	0.953079	0.327837	0.000177957	0.00203528	19	15	18	22	45	32	28	43	10.4787	15.7982	18.4958	21.817	39.5924	28.2492	33.5246	39.7971	Up Regulated
ENSG00000257258	ENSG00000257258.1		29142969	29158537	-1	lncRNA	novel transcript	379.283	0.581336	0.189387	0.000185798	0.00210716	266	432	380	498	685	584	471	722	146.702	454.988	390.467	493.857	602.684	515.549	563.931	668.221	Up Regulated
ENSG00000257027	ENSG00000257027.1		9658567	9662085	1	lncRNA	novel transcript	587.513	0.370138	0.112728	0.000200026	0.00222988	764	545	593	714	882	781	625	916	421.355	574.001	609.333	708.06	776.011	689.458	748.316	847.771	Up Regulated
ENSG00000258162	ENSG00000258162.3		81378042	81556637	1	lncRNA	novel transcript, antisense to PPFIA2	35.5777	1.14786	0.40868	0.000200134	0.00222988	15	19	22	76	81	78	70	105	8.27267	20.011	22.606	75.3677	71.2663	68.8575	83.8114	97.179	Up Regulated
ENSG00000249379	ENSG00000249379.1		53503109	53507660	1	lncRNA	novel transcript	18.5487	1.06463	0.376936	0.000202452	0.00224032	13	15	15	24	38	39	32	42	7.16965	15.7982	15.4132	23.8003	33.4336	34.4288	38.3138	38.8716	Up Regulated
ENSG00000279722	ENSG00000279722.1		53487607	53489943	-1	lncRNA	novel transcript	23.9007	0.752103	0.254265	0.000203386	0.00224643	33	19	19	14	41	21	28	48	18.1999	20.011	19.5233	13.8835	36.0731	18.5386	33.5246	44.4247	Up Regulated
ENSG00000279433	ENSG00000279433.1		77108284	77110537	-1	lncRNA	TEC	192.125	0.712611	0.24079	0.000204455	0.002257	165	65	91	128	222	152	143	191	90.9993	68.4588	93.5065	126.935	195.322	134.184	171.215	176.773	Up Regulated
ENSG00000204860	ENSG00000204860.4	FAM201A	38620474	38624990	1	lncRNA	family with sequence similarity 201 member A [Source:HGNC Symbol;Acc:HGNC:27239]	170.321	-0.512419	0.165455	0.000225667	0.0024379	156	62	83	67	62	73	37	42	86.0357	65.2992	85.2861	66.4426	54.5495	64.4436	44.3003	38.8716	Down Regulated
ENSG00000224905	ENSG00000224905.6		14027415	14144468	1	lncRNA	novel transcript, antisense to LIPI	24.1008	-1.00086	0.349458	0.000226107	0.00243902	59	19	33	13	11	13	14	8	32.5392	20.011	33.9089	12.8918	9.67814	11.4763	16.7623	7.40411	Down Regulated
ENSG00000259932	ENSG00000259932.1		45198517	45199139	-1	lncRNA	novel transcript	128.992	-1.00543	0.35662	0.000230768	0.00247615	375	88	87	54	52	100	44	8	206.817	92.6827	89.3963	53.5507	45.7512	88.2789	52.6814	7.40411	Down Regulated
ENSG00000235731	ENSG00000235731.2	LINC02250	25456271	25578813	-1	lncRNA	long intergenic non-protein coding RNA 2250 [Source:HGNC Symbol;Acc:HGNC:53148]	22.9579	1.07575	0.377222	0.00023324	0.0024974	10	3	8	10	16	15	12	24	5.51511	3.15964	8.22035	9.9168	14.0773	13.2418	14.3677	22.2123	Up Regulated
ENSG00000236548	ENSG00000236548.1	RNF217-AS1	124644434	124963165	-1	lncRNA	RNF217 antisense RNA 1 (head to head) [Source:HGNC Symbol;Acc:HGNC:50866]	195.118	0.425258	0.134404	0.000233629	0.00249888	274	144	187	182	266	224	182	311	151.114	151.663	192.151	180.486	234.035	197.745	217.91	287.835	Up Regulated
ENSG00000273448	ENSG00000273448.1		67333047	67334383	1	lncRNA	novel transcript	51.3571	0.623754	0.210604	0.000234104	0.00250138	56	38	41	76	84	68	51	118	30.8846	40.0221	42.1293	75.3677	73.9058	60.0297	61.0626	109.211	Up Regulated
ENSG00000253698	ENSG00000253698.1		178350867	178352250	1	lncRNA	novel transcript	43.0057	0.910148	0.321658	0.000236505	0.00251908	27	16	15	29	58	44	36	28	14.8908	16.8514	15.4132	28.7587	51.0302	38.8427	43.103	25.9144	Up Regulated
ENSG00000285684	ENSG00000285684.1		80115733	80134368	-1	lncRNA	novel transcript	33.8114	0.797054	0.286424	0.000238342	0.00253732	14	41	22	32	52	45	34	73	7.72116	43.1817	22.606	31.7338	45.7512	39.7255	40.7084	67.5625	Up Regulated
ENSG00000273018	ENSG00000273018.6	FAM106A	18511221	18551705	-1	lncRNA	family with sequence similarity 106 member A [Source:HGNC Symbol;Acc:HGNC:25682]	296.309	0.337426	0.101818	0.00024143	0.00256187	432	206	252	302	395	280	235	462	238.253	216.962	258.941	299.487	347.533	247.181	281.367	427.588	Up Regulated
ENSG00000248008	ENSG00000248008.2	NRAV	120488079	120495954	-1	lncRNA	negative regulator of antiviral response [Source:HGNC Symbol;Acc:HGNC:48588]	97.8123	-0.501011	0.163017	0.000243181	0.00257533	231	97	114	83	86	76	76	64	127.399	102.162	117.14	82.3094	75.6655	67.092	90.9952	59.2329	Down Regulated
ENSG00000258441	ENSG00000258441.1	LINC00641	21200079	21206900	-1	lncRNA	long intergenic non-protein coding RNA 641 [Source:HGNC Symbol;Acc:HGNC:27511]	1137.75	0.429459	0.136596	0.000245355	0.00259267	1102	827	745	1038	1210	1099	865	1625	607.765	871.007	765.52	1029.36	1064.6	970.185	1035.67	1503.96	Up Regulated
ENSG00000276855	ENSG00000276855.1		15789016	15789705	1	lncRNA	novel transcript	55.2242	0.528048	0.173165	0.000245456	0.00259267	121	50	43	71	95	85	63	136	66.7329	52.6606	44.1844	70.4093	83.584	75.0371	75.4302	125.87	Up Regulated
ENSG00000233730	ENSG00000233730.1	LINC01765	115099580	115102686	1	lncRNA	long intergenic non-protein coding RNA 1765 [Source:HGNC Symbol;Acc:HGNC:52555]	29.5751	-0.677209	0.232512	0.000246617	0.0026018	132	35	79	45	35	43	21	45	72.7995	36.8625	81.1759	44.6256	30.7941	37.9599	25.1434	41.6481	Down Regulated
ENSG00000258875	ENSG00000258875.5		91242759	91252211	1	lncRNA	novel transcript, antisense to GPR68	82.9487	0.630497	0.215222	0.000252206	0.00264745	70	51	38	124	123	127	92	94	38.6058	53.7139	39.0467	122.968	108.219	112.114	110.152	86.9983	Up Regulated
ENSG00000285879	ENSG00000285879.1		62035944	62040352	1	lncRNA	novel transcript, antisense to MED13	71.3969	0.645157	0.219107	0.000254234	0.00266323	54	24	42	57	71	44	51	102	29.7816	25.2771	43.1568	56.5258	62.468	38.8427	61.0626	94.4024	Up Regulated
ENSG00000279069	ENSG00000279069.1		58006652	58009596	1	lncRNA	novel transcript	46.3063	-0.611756	0.204323	0.00025465	0.00266621	85	43	61	47	46	33	28	21	46.8785	45.2882	62.6802	46.609	40.4722	29.132	33.5246	19.4358	Down Regulated
ENSG00000275278	ENSG00000275278.1		29156448	29156991	-1	lncRNA	novel transcript, antisense to FAR2	397.052	0.528949	0.176437	0.000269224	0.00276885	270	390	333	452	609	481	407	648	148.908	410.753	342.172	448.239	535.817	424.622	487.303	599.733	Up Regulated
ENSG00000249476	ENSG00000249476.1		109237120	109326369	-1	lncRNA	novel transcript	200.058	0.477886	0.156993	0.000276429	0.00282578	151	90	109	133	158	175	124	182	83.2782	94.7892	112.002	131.893	139.013	154.488	148.466	168.444	Up Regulated
ENSG00000224707	ENSG00000224707.1	E2F3-IT1	20437821	20440178	1	lncRNA	E2F3 intronic transcript 1 [Source:HGNC Symbol;Acc:HGNC:41329]	32.3508	0.80718	0.287401	0.000277679	0.00283428	33	8	19	12	38	24	29	31	18.1999	8.4257	19.5233	11.9002	33.4336	21.1869	34.7219	28.6909	Up Regulated
ENSG00000253526	ENSG00000253526.1		105826570	105834038	1	lncRNA	novel transcript	76.4038	0.568691	0.192308	0.000280418	0.00284935	88	58	62	52	103	80	50	139	48.533	61.0863	63.7077	51.5674	90.6226	70.6231	59.8653	128.646	Up Regulated
ENSG00000264278	ENSG00000264278.1	ZNF236-DT	76794732	76822295	-1	lncRNA	ZNF236 divergent transcript [Source:HGNC Symbol;Acc:HGNC:53779]	75.894	-0.62036	0.21247	0.000280696	0.00285075	165	73	91	94	76	81	53	14	90.9993	76.8845	93.5065	93.2179	66.8672	71.5059	63.4572	12.9572	Down Regulated
ENSG00000224596	ENSG00000224596.7	ZMIZ1-AS1	78943328	79067895	-1	lncRNA	ZMIZ1 antisense RNA 1 [Source:HGNC Symbol;Acc:HGNC:27433]	485.294	0.474515	0.156262	0.000290204	0.00292102	424	206	231	447	450	444	376	442	233.841	216.962	237.363	443.281	395.924	391.958	450.187	409.077	Up Regulated
ENSG00000254165	ENSG00000254165.1		42537529	42538304	-1	lncRNA	novel transcript	147.36	0.469531	0.154159	0.00029332	0.00294218	193	91	103	109	180	127	111	217	106.442	95.8424	105.837	108.093	158.37	112.114	132.901	200.837	Up Regulated
ENSG00000253552	ENSG00000253552.7	HOXA-AS2	27107777	27134302	1	lncRNA	HOXA cluster antisense RNA 2 [Source:HGNC Symbol;Acc:HGNC:43745]	26.4907	0.80192	0.288049	0.000303855	0.00301411	22	12	15	30	36	39	30	33	12.1332	12.6386	15.4132	29.7504	31.6739	34.4288	35.9192	30.542	Up Regulated
ENSG00000257467	ENSG00000257467.5	PPFIA2-AS1	81270669	81312422	1	lncRNA	PPFIA2 antisense RNA 1 [Source:HGNC Symbol;Acc:HGNC:53397]	30.3208	1.10893	0.415002	0.000304052	0.00301411	15	7	13	64	64	51	37	91	8.27267	7.37249	13.3581	63.4675	56.3092	45.0222	44.3003	84.2218	Up Regulated
ENSG00000278017	ENSG00000278017.1		62525919	62526793	-1	lncRNA	novel transcript, antisense to ZCCHC2	42.3248	0.619541	0.215324	0.000306016	0.00303209	36	28	31	38	49	45	45	59	19.8544	29.49	31.8539	37.6838	43.1117	39.7255	53.8787	54.6053	Up Regulated
ENSG00000255446	ENSG00000255446.1		62421845	62426724	-1	lncRNA	novel transcript	28.3309	0.733586	0.263081	0.000309001	0.0030572	29	37	28	50	85	71	54	37	15.9938	38.9689	28.7712	49.584	74.7856	62.678	64.6545	34.244	Up Regulated
ENSG00000272654	ENSG00000272654.1	JTB-DT	153977727	153979160	1	lncRNA	JTB divergent transcript [Source:HGNC Symbol;Acc:HGNC:56047]	34.8623	0.668509	0.234522	0.000318211	0.00312095	39	17	26	28	39	49	29	52	21.5089	17.9046	26.7161	27.767	34.3134	43.2567	34.7219	48.1267	Up Regulated
ENSG00000274765	ENSG00000274765.1		55343141	55343575	-1	lncRNA	novel transcript, sense intronic to CCPG1	39.1018	0.606321	0.209225	0.000321063	0.00313832	51	26	25	26	56	37	28	64	28.1271	27.3835	25.6886	25.7837	49.2705	32.6632	33.5246	59.2329	Up Regulated
ENSG00000272477	ENSG00000272477.1		18408680	18409635	-1	lncRNA	novel transcript, sense intronic to SATB1	65.5897	0.772926	0.279307	0.00032484	0.00316459	74	43	40	69	104	74	81	125	40.8118	45.2882	41.1017	68.4259	91.5024	65.3264	96.9817	115.689	Up Regulated
ENSG00000286207	ENSG00000286207.1		152635268	152641275	-1	lncRNA	novel transcript, antisense to FMNL2	537.542	0.301777	0.0949938	0.000330474	0.00320104	925	500	548	584	857	681	554	791	510.148	526.606	563.094	579.141	754.015	601.179	663.307	732.082	Up Regulated
ENSG00000260032	ENSG00000260032.2	NORAD	36045618	36051018	-1	lncRNA	non-coding RNA activated by DNA damage [Source:HGNC Symbol;Acc:HGNC:44311]	9718.25	0.245521	0.073369	0.000332109	0.0032149	17248	9391	9435	11265	11625	13084	9208	16787	9512.47	9890.72	9694.87	11171.3	10228	11550.4	11024.8	15536.6	Up Regulated
ENSG00000254060	ENSG00000254060.1		81036964	81040831	1	lncRNA	novel transcript	62.9088	0.848685	0.317829	0.000343449	0.00329218	30	63	48	62	110	85	87	121	16.5453	66.3524	49.3221	61.4842	96.7814	75.0371	104.166	111.987	Up Regulated
ENSG00000267366	ENSG00000267366.1		13500641	13501289	-1	lncRNA	novel transcript, antisense C18orf1	78.9436	0.465743	0.157979	0.00035033	0.00333454	106	50	80	68	99	80	102	109	58.4602	52.6606	82.2035	67.4342	87.1033	70.6231	122.125	100.881	Up Regulated
ENSG00000281026	ENSG00000281026.1	N4BP2L2-IT2	32504506	32509395	-1	lncRNA	N4BPL2 intronic transcript 2 [Source:HGNC Symbol;Acc:HGNC:25038]	715.173	0.385768	0.12476	0.000356682	0.00337758	973	469	605	653	913	688	579	1083	536.62	493.957	621.664	647.567	803.286	607.359	693.24	1002.33	Up Regulated
ENSG00000268858	ENSG00000268858.2		63861212	63864293	-1	lncRNA	novel transcript, antisense to ABHD16B	585.916	-0.407934	0.134004	0.000376119	0.00351838	1073	464	506	537	536	508	379	189	591.772	488.691	519.937	532.532	471.589	448.457	453.779	174.922	Down Regulated
ENSG00000280347	ENSG00000280347.1		127359785	127364759	-1	lncRNA	TEC	536.094	0.359316	0.11582	0.000395024	0.00363448	578	292	331	309	453	380	315	617	318.773	307.538	340.117	306.429	398.563	335.46	377.151	571.042	Up Regulated
ENSG00000285921	ENSG00000285921.1		96092374	96137827	1	lncRNA	novel transcript	73.6402	0.571299	0.201935	0.000397945	0.00365253	90	75	66	73	127	87	79	150	49.636	78.991	67.8179	72.3926	111.739	76.8026	94.5871	138.827	Up Regulated
ENSG00000236345	ENSG00000236345.1	SCAT8	63805797	63822699	1	lncRNA	S-phase cancer associated transcript 8 [Source:HGNC Symbol;Acc:HGNC:40967]	235.305	0.544291	0.190813	0.000401065	0.00367333	217	207	164	275	319	339	259	339	119.678	218.015	168.517	272.712	280.666	299.265	310.102	313.749	Up Regulated
ENSG00000198496	ENSG00000198496.11	NBR2	43125551	43153671	1	lncRNA	neighbor of BRCA1 lncRNA 2 [Source:HGNC Symbol;Acc:HGNC:20691]	175.136	-0.315686	0.0997257	0.000401115	0.00367333	322	147	199	176	158	145	118	162	177.587	154.822	204.481	174.536	139.013	128.004	141.282	149.933	Down Regulated
ENSG00000247157	ENSG00000247157.6	LINC01252	11548030	11590369	1	lncRNA	long intergenic non-protein coding RNA 1252 [Source:HGNC Symbol;Acc:HGNC:27888]	27.9799	0.676504	0.241445	0.000407831	0.00371141	39	17	14	18	39	32	28	35	21.5089	17.9046	14.3856	17.8502	34.3134	28.2492	33.5246	32.393	Up Regulated
ENSG00000232124	ENSG00000232124.2		44200602	44207399	-1	lncRNA	novel transcript	17.2711	0.853092	0.320972	0.000418998	0.00378705	21	13	13	15	29	22	29	32	11.5817	13.6918	13.3581	14.8752	25.5151	19.4214	34.7219	29.6165	Up Regulated
ENSG00000259712	ENSG00000259712.1		52056675	52100523	-1	lncRNA	novel transcript, antisense to MAPK6	140.738	0.471087	0.15984	0.000419032	0.00378705	136	69	68	130	145	117	107	154	75.0055	72.6717	69.873	128.918	127.576	103.286	128.112	142.529	Up Regulated
ENSG00000229140	ENSG00000229140.9	CCDC26	128634199	129683770	-1	lncRNA	CCDC26 long non-coding RNA [Source:HGNC Symbol;Acc:HGNC:28416]	185.661	0.712779	0.263639	0.000420715	0.00379798	126	132	139	221	351	233	183	314	69.4904	139.024	142.829	219.161	308.821	205.69	219.107	290.611	Up Regulated
ENSG00000225498	ENSG00000225498.1		90312496	90322592	1	lncRNA	novel transcript	13.2739	-1.78535	0.67508	0.000422655	0.00380877	30	8	17	5	1	1	4	5	16.5453	8.4257	17.4682	4.9584	0.879831	0.882789	4.78922	4.62757	Down Regulated
ENSG00000278829	ENSG00000278829.1		42272069	42275571	-1	lncRNA	novel transcript, sense intronic to STAT5B	26.0257	0.800249	0.301618	0.000432025	0.00388116	29	19	27	11	32	33	38	46	15.9938	20.011	27.7437	10.9085	28.1546	29.132	45.4976	42.5736	Up Regulated
ENSG00000237324	ENSG00000237324.3		74341579	74378802	-1	lncRNA	novel transcript	36.8759	0.623627	0.225367	0.000436566	0.00391128	53	28	27	43	54	58	38	75	29.2301	29.49	27.7437	42.6422	47.5109	51.2018	45.4976	69.4136	Up Regulated
ENSG00000259673	ENSG00000259673.5	IQCH-AS1	67290636	67521844	-1	lncRNA	IQCH antisense RNA 1 [Source:HGNC Symbol;Acc:HGNC:44104]	312.961	0.30224	0.0954636	0.000437386	0.00391546	492	237	298	351	393	388	276	492	271.344	249.611	306.208	348.08	345.774	342.522	330.456	455.353	Up Regulated
ENSG00000247373	ENSG00000247373.3	TMED2-DT	123575891	123585115	-1	lncRNA	TMED2 divergent transcript [Source:HGNC Symbol;Acc:HGNC:53346]	90.7621	-0.43839	0.147365	0.000442543	0.00395115	272	95	104	90	87	100	63	87	150.011	100.055	106.865	89.2512	76.5453	88.2789	75.4302	80.5197	Down Regulated
ENSG00000246250	ENSG00000246250.2		43827517	43880726	-1	lncRNA	novel transcript	118.296	0.485673	0.165642	0.00044324	0.00395393	165	69	77	82	127	104	95	177	90.9993	72.6717	79.1209	81.3178	111.739	91.8101	113.744	163.816	Up Regulated
ENSG00000245864	ENSG00000245864.2	MEF2C-AS2	88676014	88779088	1	lncRNA	MEF2C antisense RNA 2 [Source:HGNC Symbol;Acc:HGNC:53115]	20.3044	0.894644	0.339094	0.000451323	0.00399915	9	19	10	9	25	28	6	33	4.9636	20.011	10.2754	8.92512	21.9958	24.7181	7.18383	30.542	Up Regulated
ENSG00000233338	ENSG00000233338.1	TLR8-AS1	12902817	12908333	-1	lncRNA	TLR8 antisense RNA 1 [Source:HGNC Symbol;Acc:HGNC:40720]	11.115	0.915774	0.353736	0.00045146	0.00399915	19	18	16	16	41	39	32	24	10.4787	18.9578	16.4407	15.8669	36.0731	34.4288	38.3138	22.2123	Up Regulated
ENSG00000260267	ENSG00000260267.1		31456711	31459736	-1	lncRNA	novel transcript, antisense to ARMC5	265.89	-0.350745	0.11413	0.000451695	0.00399949	392	225	214	283	271	210	161	114	216.192	236.973	219.894	280.645	238.434	185.386	192.766	105.509	Down Regulated
ENSG00000250802	ENSG00000250802.7	ZBED3-AS1	77086688	77166909	1	lncRNA	ZBED3 antisense RNA 1 [Source:HGNC Symbol;Acc:HGNC:44188]	73.5847	0.479098	0.167551	0.000459552	0.0040514	158	48	74	84	112	113	94	145	87.1388	50.5542	76.0382	83.3011	98.5411	99.7552	112.547	134.2	Up Regulated
ENSG00000257613	ENSG00000257613.1	LINC01481	70219132	70221862	-1	lncRNA	novel transcript	64.8122	0.569631	0.203926	0.000460393	0.00405529	100	49	59	47	88	69	68	132	55.1511	51.6074	60.6251	46.609	77.4251	60.9124	81.4168	122.168	Up Regulated
ENSG00000285410	ENSG00000285410.1	GABPB1-IT1	50348936	50354861	-1	lncRNA	GABPB1 intronic transcript [Source:HGNC Symbol;Acc:HGNC:25469]	453.465	0.256725	0.0793318	0.00046102	0.00405666	777	314	380	479	565	523	387	598	428.524	330.709	390.467	475.015	497.105	461.699	463.357	553.457	Up Regulated
ENSG00000243701	ENSG00000243701.6	DUBR	107220744	107348464	1	lncRNA	DPPA2 upstream binding RNA [Source:HGNC Symbol;Acc:HGNC:48569]	38.5563	-0.587771	0.208118	0.000462105	0.00406157	116	52	63	39	48	37	25	36	63.9753	54.7671	64.7353	38.6755	42.2319	32.6632	29.9326	33.3185	Down Regulated
ENSG00000229619	ENSG00000229619.3	MBNL1-AS1	152245262	152269590	-1	lncRNA	MBNL1 antisense RNA 1 [Source:HGNC Symbol;Acc:HGNC:44584]	1825.43	0.323174	0.103864	0.000465864	0.00408753	3077	1480	1742	1742	2322	2148	1648	3001	1697	1558.76	1789.98	1727.51	2042.97	1896.23	1973.16	2777.47	Up Regulated
ENSG00000261083	ENSG00000261083.2	LINC02516	124499940	124558445	-1	lncRNA	long intergenic non-protein coding RNA 2516 [Source:HGNC Symbol;Acc:HGNC:53505]	101.933	0.492538	0.175301	0.000473333	0.0041364	165	56	81	95	94	128	106	187	90.9993	58.9799	83.231	94.2096	82.7041	112.997	126.914	173.071	Up Regulated
ENSG00000232310	ENSG00000232310.7	LINC03002	134520163	134689399	-1	lncRNA	long intergenic non-protein coding RNA 3002 [Source:HGNC Symbol;Acc:HGNC:56123]	18.1706	0.98113	0.381288	0.000473712	0.00413673	11	9	13	8	23	24	19	19	6.06662	9.47892	13.3581	7.93344	20.2361	21.1869	22.7488	17.5848	Up Regulated
[truncated: 454 more rows]

## Sheet: dotB
ENSEMBL ID	ENSEMBL ID with Version	Gene name	Gene start(bp)	Gene end(bp)	Strand	Type	Gene Description	baseMean	log2FoldChange	lfcSE	pvalue	padj	Raw Mock1	Raw Mock2	Raw Mock3	Raw Mock4	Raw ΔdotB_A	Raw ΔdotB_B	Raw ΔdotB_C	Raw ΔdotB_D	Norm Mock1	Norm Mock2	Norm Mock3	Norm Mock4	Norm ΔdotB_A	Norm ΔdotB_B	Norm ΔdotB_C	Norm ΔdotB_D	Up/Down Regulation
[truncated: 569 more rows]

[truncated: 10 more sheets: EHEC, EHEC_NT, F.novicida, L.innocua, M.luteus, NMII, P.aeruginosa, R.radiobacter, S.Typhimurium, S.aureus]
