# Supplementary material for: CYP1B1-AS1 regulates CYP1B1 to promote Coxiella burnetii pathogenesis by inhibiting ROS and host cell death.
Source: Research Square preprint supplement (doi:10.21203/rs.3.rs-5390645/v1), 2024-12-11
Supplement: Supplementary file 2 [file Data S2. Differentially Expressed lncRNAs and Their Associated mRNA Pairs Across Different Infections.xlsx]

## Sheet: Sheet1
		CYP1B1-AS1 regulates CYP1B1 to promote Coxiella burnetii pathogenesis by inhibiting ROS and host cell death.
		Arunima et al. 2024
		Data S2. Differentially Expressed lncRNAs and Their Associated mRNA Pairs Across Different Infections.

## Sheet: NMII
	ENSEMBL ID	ENSEMBL ID with Version	Gene name	Gene start(bp)	Gene end(bp)	Strand	Type	Description	baseMean	log2FoldChange	lfcSE	pvalue	padj	Raw Mock1	Raw Mock2	Raw Mock3	Raw Mock4	Raw NMII_A	Raw NMII_B	Raw NMII_C	Raw NMII_D	Norm Mock1	Norm Mock2	Norm Mock3	Norm Mock4	Norm NMII_A	Norm NMII_B	Norm NMII_C	Norm NMII_D	Up/Down Regulation
Pair 1	ENSG00000260920	ENSG00000260920.2	NA	40464319	40466767	1	lncRNA	novel transcript, sense overlapping with ZNF643	1154.63	0.38464	0.109109	4.63e-05	0.00201167	1092	779	638	962	1025	967	1103	992	602.25	820.453	655.573	953.996	1059.19	997.188	977.324	1023.84	Up Regulated
	ENSG00000187801	ENSG00000187801.15	ZFP69B	40450102	40463718	1	mRNA	ZFP69 zinc finger protein B [Source:HGNC Symbol;Acc:HGNC:28053]	1552.76	0.283612	0.109617	0.00101096	0.0184996	1601	908	1002	1266	1344	1312	1435	1167	882.969	956.317	1029.6	1255.47	1388.83	1352.96	1271.5	1204.46	Up Regulated
Pair 2	ENSG00000238186	ENSG00000238186.1	NA	40515754	40517174	-1	lncRNA	novel transcript	171.594	-0.337907	0.149798	0.0018396	0.0282221	302	137	242	126	137	114	141	121	166.556	144.29	248.666	124.952	141.57	117.559	124.934	124.884	Down Regulated
	ENSG00000164002	ENSG00000164002.11	EXO5	40508741	40516038	1	mRNA	exonuclease 5 [Source:HGNC Symbol;Acc:HGNC:26115]	2292.85	-0.215173	0.0597048	6.22e-05	0.00247124	4935	2708	2789	2472	2202	2288	2571	2264	2721.71	2852.1	2865.82	2451.43	2275.45	2359.43	2278.06	2336.68	Down Regulated
Pair 3	ENSG00000233061	ENSG00000233061.1	TTLL7-IT1	83979118	83984300	-1	lncRNA	TTLL7 intronic transcript 1 [Source:HGNC Symbol;Acc:HGNC:41486]	29.6028	-1.5388	0.307211	3.9e-08	1.2e-05	99	32	58	13	9	15	16	13	54.5996	33.7028	59.5975	12.8918	9.30021	15.4683	14.177	13.4173	Down Regulated
	ENSG00000137941	ENSG00000137941.17	TTLL7	83865024	83999150	-1	mRNA	tubulin tyrosine ligase like 7 [Source:HGNC Symbol;Acc:HGNC:26242]	144.803	-0.781979	0.153377	1.86e-08	8.39e-06	365	141	227	125	88	93	106	114	201.302	148.503	233.252	123.96	90.9354	95.9033	93.9224	117.66	Down Regulated
Pair 4	ENSG00000261737	ENSG00000261737.1	NA	86703502	86704462	-1	lncRNA	novel transcript, antisense to SH3GLB1	61.4935	0.502918	0.238037	0.00137884	0.0231272	37	64	56	50	60	93	95	51	20.4059	67.4056	57.5424	49.584	62.0014	95.9033	84.1757	52.6372	Up Regulated
	ENSG00000097033	ENSG00000097033.14	SH3GLB1	86704570	86748184	1	mRNA	SH3 domain containing GRB2 like, endophilin B1 [Source:HGNC Symbol;Acc:HGNC:10833]	7434.49	0.288484	0.101268	0.000470391	0.0106875	7725	6934	6040	8022	8109	7823	9031	7794	4260.42	7302.98	6206.36	7955.26	8379.49	8067.22	8002.01	8044.2	Up Regulated
Pair 5	ENSG00000224699	ENSG00000224699.8	LAMTOR5-AS1	110347116	110443817	1	lncRNA	LAMTOR5 antisense RNA 1 [Source:HGNC Symbol;Acc:HGNC:40823]	333.318	-0.218667	0.0843202	0.0016269	0.0258169	625	307	357	347	264	291	323	285	344.695	323.336	366.833	344.113	272.806	300.085	286.197	294.149	Down Regulated
	ENSG00000168679	ENSG00000168679.18	SLC16A4	110362851	110391082	-1	mRNA	solute carrier family 16 member 4 [Source:HGNC Symbol;Acc:HGNC:10925]	254.999	-0.313815	0.152404	0.00317129	0.0411602	386	197	334	190	169	173	185	193	212.883	207.483	343.2	188.419	174.637	178.401	163.921	199.196	Down Regulated
Pair 6	ENSG00000272668	ENSG00000272668.2	NA	159854870	159867685	1	lncRNA	novel transcript, antisense to VSIG8	145.845	0.69684	0.167963	1.33e-06	0.000143083	173	164	110	248	274	260	272	259	95.4114	172.727	113.03	245.937	283.14	268.117	241.008	267.314	Up Regulated
	ENSG00000256029	ENSG00000256029.6	NA	159834474	159873053	-1	mRNA	novel protein	58.9984	0.947504	0.258472	9.55e-06	0.000637713	29	32	26	67	76	83	64	68	15.9938	33.7028	26.7161	66.4426	78.5351	85.5911	56.7078	70.1829	Up Regulated
Pair 7	ENSG00000232995	ENSG00000232995.7	NA	163244505	163321894	-1	lncRNA	novel transcript	122.837	-0.297758	0.137175	0.00262963	0.0363407	268	114	139	145	104	103	123	102	147.805	120.066	142.829	143.794	107.469	106.215	108.985	105.274	Down Regulated
	ENSG00000143228	ENSG00000143228.13	NUF2	163266576	163355764	1	mRNA	NUF2 component of NDC80 kinetochore complex [Source:HGNC Symbol;Acc:HGNC:14621]	529.552	-0.481685	0.15964	0.000143413	0.00460051	991	608	794	480	438	349	483	421	546.548	640.353	815.87	476.006	452.61	359.895	427.967	434.515	Down Regulated
Pair 8	ENSG00000224596	ENSG00000224596.7	ZMIZ1-AS1	78943328	79067895	-1	lncRNA	ZMIZ1 antisense RNA 1 [Source:HGNC Symbol;Acc:HGNC:27433]	485.294	0.524173	0.160849	6.07e-05	0.00242538	424	206	231	447	430	429	456	411	233.841	216.962	237.363	443.281	444.343	442.393	404.043	424.194	Up Regulated
	ENSG00000108175	ENSG00000108175.17	ZMIZ1	79068966	79316519	1	mRNA	zinc finger MIZ-type containing 1 [Source:HGNC Symbol;Acc:HGNC:16493]	3267.47	0.442795	0.152793	0.000224664	0.00624264	2322	1200	936	1673	1757	1857	1984	1875	1280.61	1263.86	961.781	1659.08	1815.61	1914.97	1757.94	1935.19	Up Regulated
Pair 9	ENSG00000244332	ENSG00000244332.1	NA	94577439	94611238	1	lncRNA	novel transcript	17.6546	-0.819947	0.492414	0.00304047	0.0401548	28	5	22	7	10	3	7	3	15.4423	5.26606	22.606	6.94176	10.3336	3.09365	6.20242	3.0963	Down Regulated
	ENSG00000119969	ENSG00000119969.15	HELLS	94501434	94613905	1	mRNA	helicase, lymphoid specific [Source:HGNC Symbol;Acc:HGNC:4861]	1407.57	-0.739605	0.142429	1.11e-08	7.11e-06	2183	827	1292	617	616	495	600	629	1203.95	871.007	1327.59	611.867	636.548	510.453	531.636	649.192	Down Regulated
Pair 10	ENSG00000245614	ENSG00000245614.3	DDX11-AS1	31019434	31073847	-1	lncRNA	DDX11 antisense RNA 1 [Source:HGNC Symbol;Acc:HGNC:44176]	41.3051	-0.487222	0.221482	0.00131401	0.0222106	100	45	56	51	44	33	36	25	55.1511	47.3946	57.5424	50.5757	45.4677	34.0302	31.8982	25.8025	Down Regulated
	ENSG00000013573	ENSG00000013573.17	DDX11	31073860	31104799	1	mRNA	DEAD/H-box helicase 11 [Source:HGNC Symbol;Acc:HGNC:2736]	962.188	-0.429732	0.166699	0.00057137	0.0121801	1913	1009	1268	850	690	760	816	722	1055.04	1062.69	1302.93	842.928	713.016	783.726	723.025	745.177	Down Regulated
Pair 11	ENSG00000258162	ENSG00000258162.3	NA	81378042	81556637	1	lncRNA	novel transcript, antisense to PPFIA2	35.5777	0.735285	0.503915	0.00315543	0.0411117	15	19	22	76	81	71	64	50	8.27267	20.011	22.606	75.3677	83.7019	73.2165	56.7078	51.6051	Up Regulated
	ENSG00000139220	ENSG00000139220.16	PPFIA2	81257975	81759553	-1	mRNA	PTPRF interacting protein alpha 2 [Source:HGNC Symbol;Acc:HGNC:9246]	298.673	0.748691	0.426883	0.00210304	0.0309543	155	152	141	722	560	543	618	571	85.4842	160.088	144.884	715.993	578.68	559.952	547.585	589.33	Up Regulated
Pair 12	ENSG00000257167	ENSG00000257167.2	TMPO-AS1	98512973	98516422	-1	lncRNA	TMPO antisense RNA 1 [Source:HGNC Symbol;Acc:HGNC:44158]	232.232	-0.439174	0.161112	0.000374478	0.00900165	316	188	260	134	136	107	166	131	174.278	198.004	267.161	132.885	140.536	110.34	147.086	135.205	Down Regulated
	ENSG00000120802	ENSG00000120802.13	TMPO	98515579	98550351	1	mRNA	thymopoietin [Source:HGNC Symbol;Acc:HGNC:11875]	4477.16	-0.313487	0.118129	0.000716623	0.01432	9973	6508	7529	4931	5000	4489	5193	4705	5500.22	6854.31	7736.38	4889.97	5166.78	4629.14	4601.31	4856.04	Down Regulated
Pair 13	ENSG00000281344	ENSG00000281344.1	HELLPAR	102197585	102402596	1	lncRNA	HELLP associated long non-coding RNA [Source:HGNC Symbol;Acc:HGNC:43984]	1044.22	-0.456708	0.165712	0.000328555	0.00819853	1189	615	1054	478	507	444	523	496	655.747	647.726	1083.03	474.023	523.912	457.861	463.409	511.922	Down Regulated
	ENSG00000185480	ENSG00000185480.11	PARPBP	102120183	102197520	1	mRNA	PARP1 binding protein [Source:HGNC Symbol;Acc:HGNC:26074]	275.224	-0.317236	0.131703	0.00122709	0.0211765	485	273	364	241	231	194	255	214	267.483	287.527	374.026	238.995	238.705	200.056	225.945	220.87	Down Regulated
Pair 14	ENSG00000276672	ENSG00000276672.1	NA	33846190	33850825	1	lncRNA	novel transcript, sense intronic to RFC3	282.009	-0.733628	0.150478	5.89e-08	1.55e-05	596	211	364	171	140	164	168	169	328.701	222.228	374.026	169.577	144.67	169.12	148.858	174.425	Down Regulated
	ENSG00000133119	ENSG00000133119.13	RFC3	33818069	33966558	1	mRNA	replication factor C subunit 3 [Source:HGNC Symbol;Acc:HGNC:9971]	728.507	-0.631334	0.122185	1.4e-08	7.7e-06	2253	841	1085	625	558	577	689	627	1242.55	885.752	1114.88	619.8	576.613	595.013	610.495	647.128	Down Regulated
Pair 15	ENSG00000170919	ENSG00000170919.15	TPT1-AS1	45341345	45417975	1	lncRNA	TPT1 antisense RNA 1 [Source:HGNC Symbol;Acc:HGNC:43686]	179.498	0.292993	0.144791	0.00360778	0.0450684	204	103	110	128	161	143	153	148	112.508	108.481	113.03	126.935	166.37	147.464	135.567	152.751	Up Regulated
	ENSG00000133112	ENSG00000133112.16	TPT1	45333471	45341284	-1	mRNA	tumor protein, translationally-controlled 1 [Source:HGNC Symbol;Acc:HGNC:12022]	13852.3	0.25411	0.0913455	0.000716985	0.01432	24283	14792	14191	17388	17984	17755	22623	17228	13392.3	15579.1	14581.9	17243.3	18583.9	18309.3	20045.3	17781	Up Regulated
Pair 16	ENSG00000282864	ENSG00000282864.1	NA	91485793	91486870	1	lncRNA	TEC	42.9105	-0.630131	0.330528	0.00202272	0.0301214	53	19	34	23	17	13	14	16	29.2301	20.011	34.9365	22.8086	17.5671	13.4058	12.4048	16.5136	Down Regulated
	ENSG00000179399	ENSG00000179399.15	GPC5	91398621	92873682	1	mRNA	glypican 5 [Source:HGNC Symbol;Acc:HGNC:4453]	275.258	-0.320574	0.162934	0.00348056	0.0439386	478	234	253	216	157	183	207	193	263.622	246.452	259.969	214.203	162.237	188.713	183.414	199.196	Down Regulated
Pair 17	ENSG00000284930	ENSG00000284930.1	NA	73458850	73466167	-1	lncRNA	novel transcript	71.8928	0.768382	0.241956	5.99e-05	0.0023991	43	57	38	73	86	86	128	59	23.715	60.0331	39.0467	72.3926	88.8687	88.6848	113.416	60.894	Up Regulated
	ENSG00000133961	ENSG00000133961.20	NUMB	73275107	73458617	-1	mRNA	NUMB endocytic adaptor protein [Source:HGNC Symbol;Acc:HGNC:8060]	3121.96	0.339725	0.121032	0.000409675	0.00964231	2605	2127	2035	2697	2710	2782	3072	2664	1436.69	2240.18	2091.05	2674.56	2800.4	2868.85	2721.98	2749.52	Up Regulated
Pair 18	ENSG00000258875	ENSG00000258875.5	NA	91242759	91252211	1	lncRNA	novel transcript, antisense to GPR68	82.9487	0.764313	0.215311	1.66e-05	0.000983093	70	51	38	124	110	115	128	107	38.6058	53.7139	39.0467	122.968	113.669	118.59	113.416	110.435	Up Regulated
	ENSG00000119714	ENSG00000119714.11	GPR68	91232532	91253925	-1	mRNA	G protein-coupled receptor 68 [Source:HGNC Symbol;Acc:HGNC:4519]	531.124	0.867798	0.196379	4.61e-07	6.6e-05	356	265	201	485	520	572	652	512	196.338	279.101	206.536	480.965	537.345	589.857	577.711	528.436	Up Regulated
Pair 19	ENSG00000259488	ENSG00000259488.2	DUT-AS1	48312353	48331856	-1	lncRNA	DUT antisense RNA 1 [Source:HGNC Symbol;Acc:HGNC:55420]	77.5165	-0.508662	0.184407	0.00031475	0.00795175	159	59	75	60	35	53	43	61	87.6903	62.1396	77.0658	59.5008	36.1675	54.6546	38.1006	62.9582	Down Regulated
	ENSG00000128951	ENSG00000128951.14	DUT	48331011	48343373	1	mRNA	deoxyuridine triphosphatase [Source:HGNC Symbol;Acc:HGNC:3078]	754.496	-0.308801	0.113603	0.000619323	0.012889	2098	843	1040	745	668	696	918	747	1157.07	887.858	1068.65	738.802	690.282	717.728	813.403	770.98	Down Regulated
Pair 20	ENSG00000259426	ENSG00000259426.5	KIF23-AS1	69396904	69415029	-1	lncRNA	KIF23 and PAQR5 antisense RNA 1 [Source:HGNC Symbol;Acc:HGNC:27075]	30.56	0.79238	0.308314	0.000381733	0.00915438	21	8	11	30	36	35	22	25	11.5817	8.4257	11.303	29.7504	37.2008	36.0926	19.4933	25.8025	Up Regulated
	ENSG00000137807	ENSG00000137807.15	KIF23	69414246	69448427	1	mRNA	kinesin family member 23 [Source:HGNC Symbol;Acc:HGNC:6392]	915.586	-0.320173	0.140214	0.00176769	0.0274716	1468	886	1161	676	721	624	763	640	809.618	933.147	1192.98	670.376	745.05	643.48	676.064	660.545	Down Regulated
Pair 21	ENSG00000259426	ENSG00000259426.5	KIF23-AS1	69396904	69415029	-1	lncRNA	KIF23 and PAQR5 antisense RNA 1 [Source:HGNC Symbol;Acc:HGNC:27075]	30.56	0.79238	0.308314	0.000381733	0.00915438	21	8	11	30	36	35	22	25	11.5817	8.4257	11.303	29.7504	37.2008	36.0926	19.4933	25.8025	Up Regulated
	ENSG00000137819	ENSG00000137819.13	PAQR5	69298912	69407780	1	mRNA	progestin and adipoQ receptor family member 5 [Source:HGNC Symbol;Acc:HGNC:29645]	1716.01	0.649165	0.129106	2.77e-08	1.04e-05	2032	1272	1075	2291	2329	2290	2561	2325	1120.67	1339.69	1104.61	2271.94	2406.69	2361.49	2269.2	2399.64	Up Regulated
Pair 22	ENSG00000261061	ENSG00000261061.1	NA	81030770	81031485	1	lncRNA	novel transcript	167.906	-0.32344	0.16369	0.00325252	0.0419333	342	224	260	154	160	156	153	158	188.617	235.92	267.161	152.719	165.337	160.87	135.567	163.072	Down Regulated
	ENSG00000166451	ENSG00000166451.13	CENPN	81006552	81033114	1	mRNA	centromere protein N [Source:HGNC Symbol;Acc:HGNC:30873]	374.847	-0.411244	0.151118	0.000407096	0.00961504	795	463	616	316	332	285	389	336	438.451	487.638	632.967	313.371	343.074	293.897	344.677	346.786	Down Regulated
Pair 23	ENSG00000229330	ENSG00000229330.2	NA	66676372	66677404	1	lncRNA	novel transcript	16.6769	-0.794085	0.437573	0.00203679	0.0303087	26	13	27	16	14	5	11	3	14.3393	13.6918	27.7437	15.8669	14.467	5.15609	9.74666	3.0963	Down Regulated
	ENSG00000154229	ENSG00000154229.12	PRKCA	66302613	66810743	1	mRNA	protein kinase C alpha [Source:HGNC Symbol;Acc:HGNC:9393]	2800.03	0.163141	0.0627465	0.00276927	0.037853	3983	2182	2472	2825	2740	2671	3063	2801	2196.67	2298.11	2540.09	2801.5	2831.4	2754.38	2714	2890.92	Up Regulated
Pair 24	ENSG00000266456	ENSG00000266456.1	NA	650229	652843	1	lncRNA	novel transcript, antisense to C18orf56	18.4057	-0.959691	0.371134	0.000426751	0.0099178	33	22	22	6	7	7	6	11	18.1999	23.1707	22.606	5.95008	7.2335	7.21853	5.31636	11.3531	Down Regulated
	ENSG00000176890	ENSG00000176890.16	TYMS	657653	673578	1	mRNA	thymidylate synthetase [Source:HGNC Symbol;Acc:HGNC:12441]	197.878	-0.853479	0.172055	3.6e-08	1.17e-05	450	197	272	121	113	91	121	133	248.18	207.483	279.492	119.993	116.769	93.8409	107.213	137.27	Down Regulated
Pair 25	ENSG00000279811	ENSG00000279811.1	NA	77002849	77006846	-1	lncRNA	TEC	146.483	0.498191	0.15043	5.2e-05	0.00220219	156	89	90	137	166	149	135	153	86.0357	93.7359	92.4789	135.86	171.537	153.652	119.618	157.912	Up Regulated
	ENSG00000197971	ENSG00000197971.15	MBP	76978827	77133683	-1	mRNA	myelin basic protein [Source:HGNC Symbol;Acc:HGNC:6925]	9894.44	0.295692	0.0555089	1.26e-08	7.38e-06	15244	9351	8609	11831	11807	11404	13726	11669	8407.24	9848.59	8846.12	11732.6	12200.8	11760	12162.1	12043.6	Up Regulated
Pair 26	ENSG00000267270	ENSG00000267270.5	PARD6G-AS1	80147908	80179839	1	lncRNA	PARD6G antisense RNA 1 [Source:HGNC Symbol;Acc:HGNC:44109]	108.903	-0.616322	0.177629	2.86e-05	0.00144706	252	73	111	65	60	55	67	68	138.981	76.8845	114.057	64.4592	62.0014	56.717	59.366	70.1829	Down Regulated
	ENSG00000178184	ENSG00000178184.16	PARD6G	80157232	80247514	-1	mRNA	par-6 family cell polarity regulator gamma [Source:HGNC Symbol;Acc:HGNC:16076]	131.419	-0.514466	0.167139	0.000116949	0.00393346	266	98	145	108	74	94	102	70	146.702	103.215	148.994	107.101	76.4684	96.9345	90.3781	72.2471	Down Regulated
Pair 27	ENSG00000269535	ENSG00000269535.1	NA	52300693	52345229	-1	lncRNA	novel transcript, antisense to ZNF480 and ZNF610	35.5015	-0.633372	0.297975	0.00156187	0.0251584	82	24	34	25	23	15	23	16	45.2239	25.2771	34.9365	24.792	23.7672	15.4683	20.3794	16.5136	Down Regulated
	ENSG00000198464	ENSG00000198464.14	ZNF480	52297169	52325922	1	mRNA	zinc finger protein 480 [Source:HGNC Symbol;Acc:HGNC:23305]	972.162	-0.266034	0.103178	0.00117473	0.0206769	2591	1053	1021	946	914	820	1072	870	1428.97	1109.03	1049.12	938.129	944.488	845.599	949.856	897.928	Down Regulated
Pair 28	ENSG00000232973	ENSG00000232973.12	CYP1B1-AS1	38073447	38231651	1	lncRNA	CYP1B1 antisense RNA 1 [Source:HGNC Symbol;Acc:HGNC:28543]	51.7052	1.19082	0.237459	2.29e-08	9.57e-06	40	16	23	72	77	76	84	84	22.0604	16.8514	23.6335	71.401	79.5685	78.3726	74.429	86.6965	Up Regulated
	ENSG00000138061	ENSG00000138061.12	CYP1B1	38066973	38109902	-1	mRNA	cytochrome P450 family 1 subfamily B member 1 [Source:HGNC Symbol;Acc:HGNC:2597]	2505.27	1.2681	0.436824	0.000126213	0.00418254	1848	697	651	5593	5455	5146	6507	5759	1019.19	734.089	668.931	5546.47	5636.96	5306.65	5765.59	5943.87	Up Regulated
Pair 29	ENSG00000227028	ENSG00000227028.6	SLC8A1-AS1	39786453	40255209	1	lncRNA	SLC8A1 antisense RNA 1 [Source:HGNC Symbol;Acc:HGNC:44102]	866.843	-0.474101	0.17205	0.000318904	0.00801681	2588	838	1075	858	783	646	785	689	1427.31	882.592	1104.61	850.861	809.118	666.167	695.557	711.118	Down Regulated
	ENSG00000183023	ENSG00000183023.18	SLC8A1	40097270	40611053	-1	mRNA	solute carrier family 8 member A1 [Source:HGNC Symbol;Acc:HGNC:11068]	8930.06	-0.240373	0.108098	0.00340176	0.0431854	29970	12840	14720	11809	11540	11201	12681	11122	16528.8	13523.3	15125.4	11710.7	11924.9	11550.7	11236.1	11479	Down Regulated
Pair 30	ENSG00000204380	ENSG00000204380.4	PKP4-AS1	158658337	158735002	-1	lncRNA	PKP4 antisense RNA 1 [Source:HGNC Symbol;Acc:HGNC:52580]	72.479	-0.643818	0.216474	0.000146037	0.00464458	112	42	66	36	25	31	44	27	61.7693	44.2349	67.8179	35.7005	25.8339	31.9678	38.9866	27.8667	Down Regulated
	ENSG00000144283	ENSG00000144283.21	PKP4	158456952	158682879	1	mRNA	plakophilin 4 [Source:HGNC Symbol;Acc:HGNC:9026]	1934.28	-0.259252	0.0736484	6.11e-05	0.00243412	3358	1637	1943	1411	1307	1433	1640	1389	1851.97	1724.11	1996.52	1399.26	1350.6	1477.74	1453.14	1433.59	Down Regulated
Pair 31	ENSG00000229267	ENSG00000229267.2	SNHG31	214810181	214963575	1	lncRNA	small nucleolar RNA host gene 31 [Source:HGNC Symbol;Acc:HGNC:54196]	48.9299	-0.78732	0.215515	1.29e-05	0.000806346	89	41	60	47	32	23	27	27	49.0845	43.1817	61.6526	46.609	33.0674	23.718	23.9236	27.8667	Down Regulated
	ENSG00000144452	ENSG00000144452.15	ABCA12	214931542	215138626	-1	mRNA	ATP binding cassette subfamily A member 12 [Source:HGNC Symbol;Acc:HGNC:14637]	87.0023	-0.655259	0.287823	0.000855908	0.0163088	135	67	104	23	40	36	38	41	74.454	70.5653	106.865	22.8086	41.3343	37.1239	33.6703	42.3162	Down Regulated
Pair 32	ENSG00000229267	ENSG00000229267.2	SNHG31	214810181	214963575	1	lncRNA	small nucleolar RNA host gene 31 [Source:HGNC Symbol;Acc:HGNC:54196]	48.9299	-0.78732	0.215515	1.29e-05	0.000806346	89	41	60	47	32	23	27	27	49.0845	43.1817	61.6526	46.609	33.0674	23.718	23.9236	27.8667	Down Regulated
	ENSG00000138376	ENSG00000138376.11	BARD1	214725646	214809683	-1	mRNA	BRCA1 associated RING domain 1 [Source:HGNC Symbol;Acc:HGNC:952]	1704.75	-0.262259	0.103801	0.00137137	0.0230208	3689	1846	2457	1662	1564	1469	1835	1735	2034.52	1944.23	2524.67	1648.17	1616.17	1514.86	1625.92	1790.7	Down Regulated
Pair 33	ENSG00000286059	ENSG00000286059.1	NA	233977872	233980018	-1	lncRNA	novel transcript, antisense to TRPM8	57.4851	0.467643	0.293363	0.0037832	0.0466289	53	32	50	76	69	75	72	84	29.2301	33.7028	51.3772	75.3677	71.3016	77.3414	63.7963	86.6965	Up Regulated
	ENSG00000144481	ENSG00000144481.17	TRPM8	233917373	234019522	1	mRNA	transient receptor potential cation channel subfamily M member 8 [Source:HGNC Symbol;Acc:HGNC:17961]	2585.26	0.377754	0.174003	0.00178129	0.0276143	3073	2509	2201	3665	3541	3400	4068	3446	1694.79	2642.51	2261.62	3634.51	3659.12	3506.14	3604.49	3556.62	Up Regulated
Pair 34	ENSG00000234869	ENSG00000234869.1	LINC02925	46541495	46548196	1	lncRNA	long intergenic non-protein coding RNA 2925 [Source:HGNC Symbol;Acc:HGNC:55756]	46.1097	0.560978	0.310325	0.0023331	0.0336932	34	20	17	55	46	55	48	40	18.7514	21.0643	17.4682	54.5424	47.5344	56.717	42.5309	41.2841	Up Regulated
	ENSG00000075275	ENSG00000075275.16	CELSR1	46360834	46537620	-1	mRNA	cadherin EGF LAG seven-pass G-type receptor 1 [Source:HGNC Symbol;Acc:HGNC:1850]	1376.33	0.421236	0.166872	0.000672217	0.0136652	1480	786	595	1042	1123	1155	1321	1148	816.237	827.825	611.388	1033.33	1160.46	1191.06	1170.49	1184.85	Up Regulated
Pair 35	ENSG00000229589	ENSG00000229589.1	ACVR2B-AS1	38451027	38454820	-1	lncRNA	ACVR2B antisense RNA 1 [Source:HGNC Symbol;Acc:HGNC:44161]	28.8494	0.537419	0.303801	0.00277231	0.0378597	32	14	14	14	33	17	25	30	17.6484	14.745	14.3856	13.8835	34.1008	17.5307	22.1515	30.963	Up Regulated
	ENSG00000114739	ENSG00000114739.14	ACVR2B	38453890	38493142	1	mRNA	activin A receptor type 2B [Source:HGNC Symbol;Acc:HGNC:174]	671.027	0.336976	0.089413	1.54e-05	0.000930378	740	395	433	602	603	568	691	568	408.118	416.019	444.926	596.991	623.114	585.732	612.268	586.234	Up Regulated
Pair 36	ENSG00000244300	ENSG00000244300.2	GATA2-AS1	128489212	128502970	1	lncRNA	GATA2 antisense RNA 1 [Source:HGNC Symbol;Acc:HGNC:51108]	175.412	0.321867	0.161133	0.00323722	0.0418551	228	112	113	174	163	181	197	179	125.745	117.96	116.112	172.552	168.437	186.651	174.554	184.746	Up Regulated
	ENSG00000179348	ENSG00000179348.11	GATA2	128479427	128493201	-1	mRNA	GATA binding protein 2 [Source:HGNC Symbol;Acc:HGNC:4171]	168.665	0.664443	0.220573	0.000113146	0.00382522	132	90	66	138	154	151	193	145	72.7995	94.7892	67.8179	136.852	159.137	155.714	171.01	149.655	Up Regulated
Pair 37	ENSG00000235897	ENSG00000235897.1	TM4SF19-AS1	196318330	196325570	1	lncRNA	TM4SF19 antisense RNA 1 [Source:HGNC Symbol;Acc:HGNC:41085]	163.351	0.670613	0.180962	9.67e-06	0.000641615	106	141	116	185	219	224	233	174	58.4602	148.503	119.195	183.461	226.305	230.993	206.452	179.586	Up Regulated
	ENSG00000145107	ENSG00000145107.15	TM4SF19	196319342	196338503	-1	mRNA	transmembrane 4 L six family member 19 [Source:HGNC Symbol;Acc:HGNC:25167]	302.395	0.677311	0.246874	0.000246335	0.00664979	154	382	250	461	551	516	572	479	84.9327	402.327	256.886	457.164	569.379	532.109	506.826	494.377	Up Regulated
Pair 38	ENSG00000251175	ENSG00000251175.5	GSTCD-AS1	105746245	105827172	-1	lncRNA	GSTCD antisense RNA 1 [Source:HGNC Symbol;Acc:HGNC:41117]	28.2252	-0.8612	0.366565	0.00070351	0.0141482	42	15	27	13	12	7	9	10	23.1635	15.7982	27.7437	12.8918	12.4003	7.21853	7.97454	10.321	Down Regulated
	ENSG00000138780	ENSG00000138780.14	GSTCD	105708778	105847725	1	mRNA	glutathione S-transferase C-terminal domain containing [Source:HGNC Symbol;Acc:HGNC:25806]	635.894	-0.328175	0.0924901	3.59e-05	0.00168359	1755	700	875	642	614	570	686	670	967.902	737.249	899.101	636.659	634.481	587.794	607.837	691.508	Down Regulated
Pair 39	ENSG00000286147	ENSG00000286147.1	NA	106525401	106938640	1	lncRNA	novel transcript, antisense to DKK2	31.4019	-1.02618	0.406643	0.000471971	0.0107114	37	15	17	18	10	7	2	11	20.4059	15.7982	17.4682	17.8502	10.3336	7.21853	1.77212	11.3531	Down Regulated
	ENSG00000155011	ENSG00000155011.9	DKK2	106921802	107283806	-1	mRNA	dickkopf WNT signaling pathway inhibitor 2 [Source:HGNC Symbol;Acc:HGNC:2892]	606.49	-0.329541	0.113997	0.000337575	0.00836198	1595	738	797	769	607	601	680	612	879.66	777.271	818.952	762.602	627.247	619.762	602.521	631.646	Down Regulated
Pair 40	ENSG00000245293	ENSG00000245293.2	CYP2U1-AS1	107863473	107989692	-1	lncRNA	CYP2U1 and SGMS2 antisense RNA 1 [Source:HGNC Symbol;Acc:HGNC:54817]	165.022	-0.563013	0.236482	0.000741871	0.0147301	475	131	231	113	81	127	129	129	261.968	137.971	237.363	112.06	83.7019	130.965	114.302	133.141	Down Regulated
	ENSG00000164023	ENSG00000164023.14	SGMS2	107824563	107915047	1	mRNA	sphingomyelin synthase 2 [Source:HGNC Symbol;Acc:HGNC:28395]	400.486	-0.706423	0.175621	2.89e-06	0.000264748	1222	435	691	297	264	309	337	345	673.947	458.148	710.033	294.529	272.806	318.646	298.602	356.075	Down Regulated
Pair 41	ENSG00000261668	ENSG00000261668.1	NA	127840198	127844040	-1	lncRNA	novel transcript, antisense HSPA4L	36.6375	-0.537431	0.326881	0.00354223	0.0444683	61	24	26	20	9	14	21	20	33.6422	25.2771	26.7161	19.8336	9.30021	14.4371	18.6073	20.642	Down Regulated
	ENSG00000164070	ENSG00000164070.12	HSPA4L	127781821	127840733	1	mRNA	heat shock protein family A (Hsp70) member 4 like [Source:HGNC Symbol;Acc:HGNC:17041]	582.748	-0.625998	0.110212	8.19e-10	1.1e-06	1274	561	704	439	354	397	430	387	702.625	590.852	723.391	435.348	365.808	409.394	381.006	399.423	Down Regulated
Pair 42	ENSG00000250033	ENSG00000250033.5	SLC7A11-AS1	138057464	138178177	1	lncRNA	SLC7A11 antisense RNA 1 [Source:HGNC Symbol;Acc:HGNC:44064]	208.171	0.98316	0.289653	2.73e-05	0.00140133	76	25	31	152	124	130	168	129	41.9149	26.3303	31.8539	150.735	128.136	134.058	148.858	133.141	Up Regulated
	ENSG00000151012	ENSG00000151012.13	SLC7A11	138164097	138242349	-1	mRNA	solute carrier family 7 member 11 [Source:HGNC Symbol;Acc:HGNC:11059]	2649.65	1.23864	0.313172	3.13e-06	0.000272939	1191	331	406	2504	2384	2374	3042	2456	656.85	348.613	417.183	2483.17	2463.52	2448.11	2695.39	2534.84	Up Regulated
Pair 43	ENSG00000231652	ENSG00000231652.2	CD109-AS1	73693903	73696131	-1	lncRNA	CD109 antisense RNA 1 [Source:HGNC Symbol;Acc:HGNC:55765]	47.1655	0.701286	0.220424	6.34e-05	0.00250225	66	42	55	60	92	80	92	79	36.3997	44.2349	56.5149	59.5008	95.0688	82.4975	81.5175	81.536	Up Regulated
	ENSG00000156535	ENSG00000156535.15	CD109	73695785	73828316	1	mRNA	CD109 molecule [Source:HGNC Symbol;Acc:HGNC:21685]	7529.6	0.578786	0.125016	2.15e-07	3.8e-05	8519	5845	5874	10687	10441	9969	11801	10529	4698.32	6156.03	6035.79	10598.1	10789.3	10280.2	10456.4	10867	Up Regulated
Pair 44	ENSG00000283122	ENSG00000283122.1	HYMAI	144004916	144008262	-1	lncRNA	hydatidiform mole associated and imprinted [Source:HGNC Symbol;Acc:HGNC:5326]	50.098	-0.769426	0.282994	0.000295854	0.00762613	65	24	36	31	24	10	21	14	35.8482	25.2771	36.9916	30.7421	24.8006	10.3122	18.6073	14.4494	Down Regulated
	ENSG00000118495	ENSG00000118495.19	PLAGL1	143940300	144064599	-1	mRNA	PLAG1 like zinc finger 1 [Source:HGNC Symbol;Acc:HGNC:9046]	862.218	-0.422505	0.08412	4.18e-08	1.21e-05	1711	634	802	608	525	550	589	589	943.636	667.737	824.09	602.941	542.512	567.17	521.889	607.908	Down Regulated
Pair 45	ENSG00000227627	ENSG00000227627.2	NA	152983331	152991322	1	lncRNA	novel transcript	32.7182	-0.500931	0.259392	0.00259126	0.0361246	72	30	42	24	27	21	24	17	39.7088	31.5964	43.1568	23.8003	27.9006	21.6556	21.2654	17.5457	Down Regulated
	ENSG00000112029	ENSG00000112029.10	FBXO5	152970519	152983579	-1	mRNA	F-box protein 5 [Source:HGNC Symbol;Acc:HGNC:13584]	774.597	-0.670142	0.157131	1.05e-06	0.000118614	1943	1092	1425	702	622	579	752	706	1071.59	1150.11	1464.25	696.159	642.748	597.075	666.317	728.664	Down Regulated
Pair 46	ENSG00000227598	ENSG00000227598.1	NA	166969626	166999065	-1	lncRNA	novel transcript	45.064	-0.629141	0.247429	0.000496436	0.0111053	92	33	46	36	19	27	29	26	50.739	34.756	47.267	35.7005	19.6338	27.8429	25.6957	26.8346	Down Regulated
	ENSG00000265828	ENSG00000265828.1	MIR3939	166997807	166997912	-1	mRNA	microRNA 3939 [Source:HGNC Symbol;Acc:HGNC:38931]	35.2243	-0.588785	0.282362	0.00148488	0.0242646	68	28	45	18	28	19	17	14	37.5028	29.49	46.2395	17.8502	28.934	19.5931	15.063	14.4494	Down Regulated
Pair 47	ENSG00000285730	ENSG00000285730.1	NA	166995735	166999511	-1	lncRNA	novel transcript	120.281	-0.476975	0.190838	0.000643866	0.0132525	246	92	155	91	68	69	91	97	135.672	96.8956	159.269	90.2429	70.2682	71.1541	80.6315	100.114	Down Regulated
	ENSG00000265828	ENSG00000265828.1	MIR3939	166997807	166997912	-1	mRNA	microRNA 3939 [Source:HGNC Symbol;Acc:HGNC:38931]	35.2243	-0.588785	0.282362	0.00148488	0.0242646	68	28	45	18	28	19	17	14	37.5028	29.49	46.2395	17.8502	28.934	19.5931	15.063	14.4494	Down Regulated
Pair 48	ENSG00000271122	ENSG00000271122.1	HERPUD2-AS1	35695214	35699413	1	lncRNA	HERPUD2 antisense RNA 1 [Source:HGNC Symbol;Acc:HGNC:55258]	412.816	0.328948	0.0820144	5.62e-06	0.000424735	788	434	357	545	591	521	651	566	434.591	457.094	366.833	540.466	610.714	537.265	576.825	584.17	Up Regulated
	ENSG00000122557	ENSG00000122557.10	HERPUD2	35632659	35697459	-1	mRNA	HERPUD family member 2 [Source:HGNC Symbol;Acc:HGNC:21915]	750.947	0.227051	0.0722352	0.000282737	0.00737221	1155	810	688	956	913	900	1081	876	636.995	853.102	706.95	948.046	943.455	928.096	957.831	904.121	Up Regulated
Pair 49	ENSG00000273117	ENSG00000273117.1	INSIG1-DT	155295918	155297541	-1	lncRNA	INSIG1 divergent transcript [Source:HGNC Symbol;Acc:HGNC:55155]	76.7829	0.657559	0.216514	0.000105046	0.00362236	90	52	61	77	113	111	92	97	49.636	54.7671	62.6802	76.3594	116.769	114.465	81.5175	100.114	Up Regulated
	ENSG00000186480	ENSG00000186480.13	INSIG1	155297776	155310235	1	mRNA	insulin induced gene 1 [Source:HGNC Symbol;Acc:HGNC:6083]	3960.91	0.628218	0.14623	9.41e-07	0.000109237	3351	2839	2774	4469	4564	5005	5529	4574	1848.11	2990.07	2850.41	4431.82	4716.24	5161.25	4899.03	4720.83	Up Regulated
Pair 50	ENSG00000183154	ENSG00000183154.1	NA	37734761	37737426	-1	lncRNA	novel transcript, antisense to ERLIN2	63.8922	0.462364	0.182185	0.000567855	0.0121286	82	67	49	101	111	92	104	82	45.2239	70.5653	50.3496	100.16	114.703	94.8721	92.1503	84.6323	Up Regulated
	ENSG00000147475	ENSG00000147475.15	ERLIN2	37736601	37758422	1	mRNA	ER lipid raft associated 2 [Source:HGNC Symbol;Acc:HGNC:1356]	6633.81	0.219773	0.0551844	1.34e-05	0.00082422	11674	6689	6161	7746	8142	7638	9055	7841	6438.34	7044.94	6330.7	7681.55	8413.59	7876.45	8023.27	8092.71	Up Regulated
Pair 51	ENSG00000246263	ENSG00000246263.2	UBR5-DT	102239386	102253750	1	lncRNA	UBR5 divergent transcript [Source:HGNC Symbol;Acc:HGNC:51661]	73.5709	0.42022	0.154996	0.000361861	0.00879149	147	53	51	101	105	92	122	103	81.0721	55.8203	52.4047	100.16	108.502	94.8721	108.099	106.306	Up Regulated
	ENSG00000048392	ENSG00000048392.11	RRM2B	102204502	102238961	-1	mRNA	ribonucleotide reductase regulatory TP53 inducible subunit M2B [Source:HGNC Symbol;Acc:HGNC:17296]	1882.72	0.219608	0.095411	0.00338433	0.0430718	3682	2088	2181	2599	2661	2609	3114	2620	2030.66	2199.11	2241.07	2577.38	2749.76	2690.45	2759.19	2704.11	Up Regulated
Pair 52	ENSG00000280303	ENSG00000280303.2	ERICD	140636281	140638283	1	lncRNA	E2F1-regulated inhibitor of cell death [Source:HGNC Symbol;Acc:HGNC:49404]	99.1021	0.6193	0.283364	0.00103098	0.0187655	45	45	25	62	58	76	80	61	24.818	47.3946	25.6886	61.4842	59.9347	78.3726	70.8848	62.9582	Up Regulated
	ENSG00000123908	ENSG00000123908.12	AGO2	140520156	140635633	-1	mRNA	argonaute RISC catalytic component 2 [Source:HGNC Symbol;Acc:HGNC:3263]	6815.25	0.286307	0.106603	0.000761524	0.0150614	5278	3413	3068	3952	4134	4203	4836	4162	2910.88	3594.62	3152.5	3919.12	4271.9	4334.21	4284.99	4295.61	Up Regulated
Pair 53	ENSG00000204860	ENSG00000204860.4	FAM201A	38620474	38624990	1	lncRNA	family with sequence similarity 201 member A [Source:HGNC Symbol;Acc:HGNC:27239]	170.321	-0.406033	0.175747	0.00124887	0.0214249	156	62	83	67	58	46	65	48	86.0357	65.2992	85.2861	66.4426	59.9347	47.436	57.5939	49.5409	Down Regulated
	ENSG00000180071	ENSG00000180071.20	ANKRD18A	38571358	38620596	-1	mRNA	ankyrin repeat domain 18A [Source:HGNC Symbol;Acc:HGNC:23643]	528.458	-0.612604	0.216304	0.000214061	0.00604271	463	132	187	100	104	117	93	104	255.35	139.024	192.151	99.168	107.469	120.653	82.4036	107.339	Down Regulated
Pair 54	ENSG00000285650	ENSG00000285650.1	NA	92600094	92612368	-1	lncRNA	Novel transcript, antisense to CENPP	60.4108	-0.68689	0.310901	0.00102292	0.018668	112	15	71	26	28	25	25	20	61.7693	15.7982	72.9556	25.7837	28.934	25.7805	22.1515	20.642	Down Regulated
	ENSG00000188312	ENSG00000188312.14	CENPP	92325953	92620529	1	mRNA	centromere protein P [Source:HGNC Symbol;Acc:HGNC:32933]	237.665	-0.604124	0.128542	1.58e-07	3.15e-05	560	230	285	183	157	133	196	178	308.846	242.239	292.85	181.477	162.237	137.152	173.668	183.714	Down Regulated
Pair 55	ENSG00000233338	ENSG00000233338.1	TLR8-AS1	12902817	12908333	-1	lncRNA	TLR8 antisense RNA 1 [Source:HGNC Symbol;Acc:HGNC:40720]	11.115	0.881588	0.367264	0.00054232	0.0118193	19	18	16	16	31	40	29	30	10.4787	18.9578	16.4407	15.8669	32.0341	41.2487	25.6957	30.963	Up Regulated
	ENSG00000101916	ENSG00000101916.11	TLR8	12906620	12923169	1	mRNA	toll like receptor 8 [Source:HGNC Symbol;Acc:HGNC:15632]	383.284	0.386141	0.204417	0.00302628	0.0400715	1089	557	576	882	864	906	1077	1001	600.596	586.64	591.865	874.662	892.82	934.284	954.287	1033.13	Up Regulated

## Sheet: B.subtilis
ENSEMBL ID	ENSEMBL ID with Version	Gene name	Gene start(bp)	Gene end(bp)	Strand	Type	Description	baseMean	log2FoldChange	lfcSE	pvalue	padj	Raw Mock1	Raw Mock2	Raw B.subtilis_A	Raw B.subtilis_B	Raw B.subtilis_C	Raw B.subtilis_D	Norm Mock1	Norm Mock2	Norm B.subtilis_A	Norm B.subtilis_B	Norm B.subtilis_C	Norm B.subtilis_D	Up/Down Regulation
ENSG00000285646	ENSG00000285646.1		11907940	11914298	1	lncRNA	novel transcript	145.4834	3.049974	0.2515003	3.81e-35	5.53e-32	51	31	269	362	238	274	45.46222	25.97017	284.2693	325.2474	295.5786	307.8129	Up Regulated
ENSG00000201801	ENSG00000201801.1	RNU5E-4P	11909808	11909927	-1	mRNA	RNA, U5E small nuclear 4, pseudogene [Source:HGNC Symbol;Acc:HGNC:42513]	55.80414	1.981783	0.2928578	6.870164e-13	7.974102e-11	34	30	110	127	116	80	30.30815	25.13242	116.244	114.1061	144.0635	89.87238	Up Regulated
ENSG00000228060	ENSG00000228060.2	PABPC4-AS1	39565052	39573860	1	lncRNA	PABPC4 antisense RNA 1 [Source:HGNC Symbol;Acc:HGNC:40424]	771.3002	1.620722	0.1964416	6.12e-18	1.34e-15	569	704	1711	1854	1403	1562	507.2157	589.7741	1808.122	1665.77	1742.423	1754.758	Up Regulated
ENSG00000201457	ENSG00000201457.1	SNORA55	39567374	39567508	-1	mRNA	small nucleolar RNA, H/ACA box 55 [Source:HGNC Symbol;Acc:HGNC:32649]	316.1437	1.424853	0.1985887	3.889984e-14	5.30291e-12	265	279	624	642	575	589	236.2253	233.7315	659.4202	576.82	714.108	661.6854	Up Regulated
ENSG00000228060	ENSG00000228060.2	PABPC4-AS1	39565052	39573860	1	lncRNA	PABPC4 antisense RNA 1 [Source:HGNC Symbol;Acc:HGNC:40424]	771.3002	1.620722	0.1964416	6.12e-18	1.34e-15	569	704	1711	1854	1403	1562	507.2157	589.7741	1808.122	1665.77	1742.423	1754.758	Up Regulated
ENSG00000090621	ENSG00000090621.14	PABPC4	39560709	39576790	-1	mRNA	poly(A) binding protein cytoplasmic 4 [Source:HGNC Symbol;Acc:HGNC:8557]	18537.85	0.71548	0.08834342	4.429373e-17	9.275199e-15	17870	18381	25655	27234	22081	22562	15929.6	15398.63	27111.26	24469.03	27422.99	25346.26	Up Regulated
ENSG00000259943	ENSG00000259943.1	ZMPSTE24-DT	40256333	40257971	-1	lncRNA	ZMPSTE24 divergent transcript [Source:HGNC Symbol;Acc:HGNC:55402]	1944.936	-0.393278	0.08721212	1.41e-06	4.98e-05	3364	3428	2055	2510	1866	1831	2998.724	2871.798	2171.648	2255.168	2317.436	2056.954	Down Regulated
ENSG00000231296	ENSG00000231296.1		40262672	40262984	-1	mRNA	pseudogene similar to part of RIO kinase 2 (yeast) (RIOK2)	77.82911	-1.106405	0.20464	4.47836e-09	2.824983e-07	152	190	70	85	38	55	135.4952	159.172	73.97343	76.37025	47.19322	61.78726	Down Regulated
ENSG00000285728	ENSG00000285728.1		42658687	42682207	-1	lncRNA	novel transcript, antisense to PPIH	129.9286	-0.4761895	0.1590798	0.000365147	0.006149974	203	211	104	129	132	92	180.9575	176.7647	109.9034	115.9031	163.9344	103.3532	Down Regulated
ENSG00000065978	ENSG00000065978.19	YBX1	42682418	42703805	1	mRNA	Y-box binding protein 1 [Source:HGNC Symbol;Acc:HGNC:8014]	49261.45	0.2041178	0.07450688	0.003209356	0.03662272	62654	65065	60416	71860	52341	57385	55850.78	54508.03	63845.41	64564.31	65003.7	64466.58	Up Regulated
ENSG00000285728	ENSG00000285728.1		42658687	42682207	-1	lncRNA	novel transcript, antisense to PPIH	129.9286	-0.4761895	0.1590798	0.000365147	0.006149974	203	211	104	129	132	92	180.9575	176.7647	109.9034	115.9031	163.9344	103.3532	Down Regulated
ENSG00000186409	ENSG00000186409.16	CCDC30	42463221	42657190	1	mRNA	coiled-coil domain containing 30 [Source:HGNC Symbol;Acc:HGNC:26103]	700.8692	-0.2977459	0.1209534	0.004124562	0.04449182	807	940	585	662	427	558	719.3727	787.4825	618.2065	594.7895	530.3028	626.8599	Down Regulated
ENSG00000234694	ENSG00000234694.1	CDC20-DT	43354684	43358676	-1	lncRNA	CDC20 divergent transcript [Source:HGNC Symbol;Acc:HGNC:55681]	35.20516	-0.8668222	0.3116672	0.00028312	0.00495753	55	42	18	16	22	20	49.02788	35.18539	19.02174	14.37558	27.32239	22.4681	Down Regulated
ENSG00000117400	ENSG00000117400.17	MPL	43337818	43354466	1	mRNA	MPL proto-oncogene, thrombopoietin receptor [Source:HGNC Symbol;Acc:HGNC:7217]	22.64755	-1.752095	0.3786421	2.509727e-07	1.070957e-05	32	30	3	11	7	6	28.52531	25.13242	3.17029	9.883208	8.693489	6.740429	Down Regulated
ENSG00000234807	ENSG00000234807.6	LINC01135	58784384	58901109	1	lncRNA	long intergenic non-protein coding RNA 1135 [Source:HGNC Symbol;Acc:HGNC:49450]	19.03975	2.26258	0.5001695	4.65e-07	1.86e-05	9	5	36	35	25	30	8.022744	4.188737	38.04348	31.44657	31.04817	33.70214	Up Regulated
ENSG00000177606	ENSG00000177606.6	JUN	58776845	58784048	-1	mRNA	Jun proto-oncogene, AP-1 transcription factor subunit [Source:HGNC Symbol;Acc:HGNC:6204]	9918.418	3.43783	0.1946292	1.812134e-71	3.680806e-67	2639	2395	23459	27167	20082	19499	2352.447	2006.405	24790.61	24408.83	24940.38	21905.27	Up Regulated
ENSG00000273338	ENSG00000273338.1		78004346	78004554	-1	lncRNA	novel transcript, antisense to DNAJB4	68.67149	2.312276	0.2943298	2.04e-16	3.93e-14	38	22	141	126	125	114	33.87381	18.43044	149.0036	113.2077	155.2409	128.0681	Up Regulated
ENSG00000162616	ENSG00000162616.9	DNAJB4	77979175	78017964	1	mRNA	DnaJ heat shock protein family (Hsp40) member B4 [Source:HGNC Symbol;Acc:HGNC:14886]	312.8024	0.8051758	0.1608954	3.788221e-08	1.964198e-06	253	310	449	460	339	405	225.5283	259.7017	474.4867	413.2978	421.0132	454.9789	Up Regulated
ENSG00000230735	ENSG00000230735.1		89629725	89676386	1	lncRNA	novel transcript	104.554	-1.375088	0.2968107	2.21e-07	9.52e-06	94	106	21	42	29	24	83.79311	88.80122	22.19203	37.73589	36.01588	26.96171	Down Regulated
ENSG00000226394	ENSG00000226394.2		89661212	89661353	-1	mRNA	NADH dehydrogenase (ubiquinone) 1 alpha subcomplex, 4, 9kDa (NDUFA4) pseudogene	71.95777	-1.591496	0.3561333	4.631968e-07	1.859378e-05	71	55	14	20	9	19	63.29054	46.0761	14.79469	17.96947	11.17734	21.34469	Down Regulated
ENSG00000228852	ENSG00000228852.6		95243167	95278940	-1	lncRNA	novel transcript, antisense to RWDD3	50.81474	-0.7060946	0.2531788	0.000372521	0.006263783	76	87	35	26	32	53	67.74762	72.88402	36.98671	23.36031	39.74166	59.54045	Down Regulated
ENSG00000122481	ENSG00000122481.17	RWDD3	95234210	95247225	1	mRNA	RWD domain containing 3 [Source:HGNC Symbol;Acc:HGNC:21393]	138.596	-0.5357543	0.1383383	1.295401e-05	0.0003453042	221	194	116	148	78	109	197.0029	162.523	122.5845	132.9741	96.8703	122.4511	Down Regulated
ENSG00000224699	ENSG00000224699.8	LAMTOR5-AS1	110347116	110443817	1	lncRNA	LAMTOR5 antisense RNA 1 [Source:HGNC Symbol;Acc:HGNC:40823]	333.3179	-0.6803226	0.1057759	1.24e-11	1.23e-09	360	403	190	214	149	205	320.9098	337.6122	200.785	192.2733	185.0471	230.298	Down Regulated
ENSG00000168679	ENSG00000168679.18	SLC16A4	110362851	110391082	-1	mRNA	solute carrier family 16 member 4 [Source:HGNC Symbol;Acc:HGNC:10925]	254.9986	-0.9016467	0.1738895	1.679641e-08	9.503305e-07	268	337	109	169	94	135	238.8995	282.3208	115.1872	151.842	116.7411	151.6596	Down Regulated
ENSG00000273373	ENSG00000273373.1	SLC16A4-AS1	110370154	110373003	1	lncRNA	SLC16A4 antisense RNA 1 [Source:HGNC Symbol;Acc:HGNC:56051]	354.8019	-0.8783507	0.1492632	3.21e-10	2.58e-08	329	399	154	189	121	160	293.2759	334.2612	162.7415	169.8115	150.2732	179.7448	Down Regulated
ENSG00000168679	ENSG00000168679.18	SLC16A4	110362851	110391082	-1	mRNA	solute carrier family 16 member 4 [Source:HGNC Symbol;Acc:HGNC:10925]	254.9986	-0.9016467	0.1738895	1.679641e-08	9.503305e-07	268	337	109	169	94	135	238.8995	282.3208	115.1872	151.842	116.7411	151.6596	Down Regulated
ENSG00000226167	ENSG00000226167.1	AP4B1-AS1	113856635	113901237	1	lncRNA	AP4B1 antisense RNA 1 [Source:HGNC Symbol;Acc:HGNC:44114]	30.38627	-0.7381554	0.2799908	0.000542313	0.008592402	40	61	24	24	17	23	35.65664	51.10259	25.36232	21.56336	21.11276	25.83831	Down Regulated
ENSG00000118655	ENSG00000118655.6	DCLRE1B	113904619	113914086	1	mRNA	DNA cross-link repair 1B [Source:HGNC Symbol;Acc:HGNC:17641]	1137.887	0.4033031	0.1255811	0.0002225599	0.004021919	1714	1778	1985	2182	1710	1859	1527.887	1489.515	2097.675	1960.469	2123.695	2088.409	Up Regulated
ENSG00000235527	ENSG00000235527.6	HIPK1-AS1	113924000	113929495	-1	lncRNA	HIPK1 antisense RNA 1 [Source:HGNC Symbol;Acc:HGNC:50576]	227.374	1.737105	0.2576428	5.85e-13	6.82e-11	173	146	408	611	383	429	154.215	122.3111	431.1594	548.9673	475.658	481.9406	Up Regulated
ENSG00000163349	ENSG00000163349.22	HIPK1	113929324	113977869	1	mRNA	homeodomain interacting protein kinase 1 [Source:HGNC Symbol;Acc:HGNC:19006]	8107.61	0.3269998	0.1198029	0.001516116	0.02015403	8416	9100	8678	10874	7765	9520	7502.157	7623.501	9170.591	9770.001	9643.563	10694.81	Up Regulated
ENSG00000274020	ENSG00000274020.3	LINC01138	148290889	148519604	-1	lncRNA	long intergenic non-protein coding RNA 1138 [Source:HGNC Symbol;Acc:HGNC:49454]	260.3243	-0.466025	0.1356152	8.73e-05	0.001816134	321	343	208	223	136	187	286.1446	287.3473	219.8067	200.3596	168.9021	210.0767	Down Regulated
ENSG00000274210	ENSG00000274210.1	RNVU1-27	148522601	148522765	1	mRNA	RNA, variant U1 small nuclear 27 [Source:HGNC Symbol;Acc:HGNC:54431]	582.8473	2.779055	0.182681	9.819921e-54	3.989245e-50	209	201	1244	1484	942	1011	186.306	168.3872	1314.613	1333.335	1169.895	1135.762	Up Regulated
ENSG00000274020	ENSG00000274020.3	LINC01138	148290889	148519604	-1	lncRNA	long intergenic non-protein coding RNA 1138 [Source:HGNC Symbol;Acc:HGNC:49454]	260.3243	-0.466025	0.1356152	8.73e-05	0.001816134	321	343	208	223	136	187	286.1446	287.3473	219.8067	200.3596	168.9021	210.0767	Down Regulated
ENSG00000201183	ENSG00000201183.1	RNVU1-3	148402715	148402875	1	mRNA	RNA, variant U1 small nuclear 3 [Source:HGNC Symbol;Acc:HGNC:48311]	53.13606	1.840551	0.3105382	1.514291e-10	1.286957e-08	31	36	121	128	77	93	27.6339	30.1589	127.8683	115.0046	95.62837	104.4766	Up Regulated
ENSG00000274020	ENSG00000274020.3	LINC01138	148290889	148519604	-1	lncRNA	long intergenic non-protein coding RNA 1138 [Source:HGNC Symbol;Acc:HGNC:49454]	260.3243	-0.466025	0.1356152	8.73e-05	0.001816134	321	343	208	223	136	187	286.1446	287.3473	219.8067	200.3596	168.9021	210.0767	Down Regulated
ENSG00000231551	ENSG00000231551.8	PDE4DIPP6	148415258	148428847	1	mRNA	PDE4DIP pseudogene 6 [Source:HGNC Symbol;Acc:HGNC:55097]	726.824	-0.3905523	0.1385913	0.0009285448	0.01332905	840	965	522	601	421	594	748.7895	808.4262	551.6304	539.9826	522.8512	667.3024	Down Regulated
ENSG00000274020	ENSG00000274020.3	LINC01138	148290889	148519604	-1	lncRNA	long intergenic non-protein coding RNA 1138 [Source:HGNC Symbol;Acc:HGNC:49454]	260.3243	-0.466025	0.1356152	8.73e-05	0.001816134	321	343	208	223	136	187	286.1446	287.3473	219.8067	200.3596	168.9021	210.0767	Down Regulated
ENSG00000238825	ENSG00000238825.1	RNVU1-2	148388490	148388651	-1	mRNA	RNA, variant U1 small nuclear 2 [Source:HGNC Symbol;Acc:HGNC:48308]	77.10202	3.24255	0.3214195	7.887739e-25	3.482951e-22	17	13	114	173	95	105	15.15407	10.89072	120.471	155.4359	117.9831	117.9575	Up Regulated
ENSG00000274020	ENSG00000274020.3	LINC01138	148290889	148519604	-1	lncRNA	long intergenic non-protein coding RNA 1138 [Source:HGNC Symbol;Acc:HGNC:49454]	260.3243	-0.466025	0.1356152	8.73e-05	0.001816134	321	343	208	223	136	187	286.1446	287.3473	219.8067	200.3596	168.9021	210.0767	Down Regulated
ENSG00000278596	ENSG00000278596.1	MIR6077	148388282	148388363	1	mRNA	microRNA 6077 [Source:HGNC Symbol;Acc:HGNC:50025]	30.26465	4.818211	0.8300606	5.583124e-09	3.478663e-07	0	3	50	65	27	30	0	2.513242	52.83816	58.40078	33.53203	33.70214	Up Regulated
ENSG00000274020	ENSG00000274020.3	LINC01138	148290889	148519604	-1	lncRNA	long intergenic non-protein coding RNA 1138 [Source:HGNC Symbol;Acc:HGNC:49454]	260.3243	-0.466025	0.1356152	8.73e-05	0.001816134	321	343	208	223	136	187	286.1446	287.3473	219.8067	200.3596	168.9021	210.0767	Down Regulated
ENSG00000283676	ENSG00000283676.1	MIR5087	148334479	148334554	-1	mRNA	microRNA 5087 [Source:HGNC Symbol;Acc:HGNC:43480]	34.33483	3.846404	0.5011632	4.749262e-15	7.595827e-13	4	6	70	81	49	57	3.565664	5.026484	73.97343	72.77635	60.85442	64.03407	Up Regulated
ENSG00000203804	ENSG00000203804.4	ADAMTSL4-AS1	150560202	150562115	-1	lncRNA	ADAMTSL4 antisense RNA 1 [Source:HGNC Symbol;Acc:HGNC:32041]	484.4153	1.136843	0.1846278	3.63e-11	3.43e-09	362	431	703	874	537	828	322.6926	361.0691	742.9045	785.2658	666.9148	930.1792	Up Regulated
ENSG00000143384	ENSG00000143384.13	MCL1	150560895	150579738	-1	mRNA	MCL1 apoptosis regulator, BCL2 family member [Source:HGNC Symbol;Acc:HGNC:6943]	32100.14	0.7832579	0.1020455	1.164708e-15	2.022013e-13	38912	39816	57737	65581	48758	51428	34686.78	33355.75	61014.34	58922.79	60553.87	57774.46	Up Regulated
ENSG00000203804	ENSG00000203804.4	ADAMTSL4-AS1	150560202	150562115	-1	lncRNA	ADAMTSL4 antisense RNA 1 [Source:HGNC Symbol;Acc:HGNC:32041]	484.4153	1.136843	0.1846278	3.63e-11	3.43e-09	362	431	703	874	537	828	322.6926	361.0691	742.9045	785.2658	666.9148	930.1792	Up Regulated
ENSG00000274963	ENSG00000274963.1	RN7SL600P	150568971	150569269	-1	mRNA	RNA, 7SL, cytoplasmic 600, pseudogene [Source:HGNC Symbol;Acc:HGNC:46616]	145.6335	1.271493	0.2472291	1.225031e-08	7.089127e-07	105	144	236	278	177	339	93.59868	120.6356	249.3961	249.7756	219.8211	380.8342	Up Regulated
ENSG00000203804	ENSG00000203804.4	ADAMTSL4-AS1	150560202	150562115	-1	lncRNA	ADAMTSL4 antisense RNA 1 [Source:HGNC Symbol;Acc:HGNC:32041]	484.4153	1.136843	0.1846278	3.63e-11	3.43e-09	362	431	703	874	537	828	322.6926	361.0691	742.9045	785.2658	666.9148	930.1792	Up Regulated
ENSG00000277452	ENSG00000277452.1	RN7SL473P	150566562	150566860	-1	mRNA	RNA, 7SL, cytoplasmic 473, pseudogene [Source:HGNC Symbol;Acc:HGNC:46489]	97.19467	1.58985	0.2912664	1.986239e-09	1.376945e-07	61	87	176	218	145	231	54.37638	72.88402	185.9903	195.8672	180.0794	259.5065	Up Regulated
ENSG00000228606	ENSG00000228606.2	DCAF8-DT	160261731	160263328	1	lncRNA	DCAF8 divergent transcript [Source:HGNC Symbol;Acc:HGNC:55792]	75.64464	0.5025355	0.2340636	0.00304637	0.03515159	63	86	79	119	69	111	56.15921	72.04627	83.48429	106.9183	85.69296	124.6979	Up Regulated
ENSG00000224261	ENSG00000224261.2	RPSAP18	160266340	160267225	-1	mRNA	ribosomal protein SA pseudogene 18 [Source:HGNC Symbol;Acc:HGNC:36106]	42.42019	0.8307773	0.2984209	0.000316636	0.005459687	29	41	39	74	49	64	25.85107	34.34764	41.21377	66.48704	60.85442	71.89791	Up Regulated
ENSG00000228606	ENSG00000228606.2	DCAF8-DT	160261731	160263328	1	lncRNA	DCAF8 divergent transcript [Source:HGNC Symbol;Acc:HGNC:55792]	75.64464	0.5025355	0.2340636	0.00304637	0.03515159	63	86	79	119	69	111	56.15921	72.04627	83.48429	106.9183	85.69296	124.6979	Up Regulated
ENSG00000258465	ENSG00000258465.7		160216800	160285130	-1	mRNA	novel protein	15.34688	1.321681	0.4244409	9.797487e-05	0.001994054	12	14	30	34	23	36	10.69699	11.72846	31.7029	30.5481	28.56432	40.44257	Up Regulated
ENSG00000228606	ENSG00000228606.2	DCAF8-DT	160261731	160263328	1	lncRNA	DCAF8 divergent transcript [Source:HGNC Symbol;Acc:HGNC:55792]	75.64464	0.5025355	0.2340636	0.00304637	0.03515159	63	86	79	119	69	111	56.15921	72.04627	83.48429	106.9183	85.69296	124.6979	Up Regulated
ENSG00000132716	ENSG00000132716.18	DCAF8	160215715	160262549	-1	mRNA	DDB1 and CUL4 associated factor 8 [Source:HGNC Symbol;Acc:HGNC:24891]	1630.617	0.2772936	0.07017332	2.789418e-05	0.0006729056	1581	1872	1746	2049	1450	1626	1409.329	1568.263	1845.109	1840.972	1800.794	1826.656	Up Regulated
ENSG00000233791	ENSG00000233791.5	BTG2-DT	203298758	203305315	-1	lncRNA	BTG2 divergent transcript [Source:HGNC Symbol;Acc:HGNC:49452]	44.57061	1.615798	0.322984	3.71e-08	1.94e-06	22	15	52	50	48	49	19.61115	12.56621	54.95169	44.92367	59.61249	55.04683	Up Regulated
ENSG00000159388	ENSG00000159388.6	BTG2	203305491	203309602	1	mRNA	BTG anti-proliferation factor 2 [Source:HGNC Symbol;Acc:HGNC:1131]	3416.018	2.714005	0.230548	1.486518e-33	1.677452e-30	899	1198	6676	6013	4986	5085	801.383	1003.621	7054.951	5402.521	6192.248	5712.513	Up Regulated
ENSG00000235862	ENSG00000235862.2		212624284	212626771	-1	lncRNA	novel transcript	19.71441	2.861004	0.5728274	3.32e-08	1.76e-06	10	4	41	62	42	48	8.91416	3.350989	43.32729	55.70536	52.16093	53.92343	Up Regulated
ENSG00000162772	ENSG00000162772.17	ATF3	212565334	212620777	1	mRNA	activating transcription factor 3 [Source:HGNC Symbol;Acc:HGNC:785]	22097.55	2.547057	0.241119	1.222546e-27	7.76011e-25	12278	12531	62612	72082	51141	57278	10944.81	10497.81	66166.06	64763.77	63513.39	64346.38	Up Regulated
ENSG00000278467	ENSG00000278467.1		223994262	223995196	1	lncRNA	novel transcript	59.62489	-0.5470305	0.2201319	0.001186175	0.01636792	90	156	64	78	52	56	80.22744	130.6886	67.63285	70.08093	64.5802	62.91067	Down Regulated
ENSG00000185495	ENSG00000185495.10	SEPTIN7P13	223995895	224003654	1	mRNA	septin 7 pseudogene 13 [Source:HGNC Symbol;Acc:HGNC:55092]	239.2986	-0.5683692	0.1731278	0.0001125335	0.002245365	361	468	231	263	161	207	321.8012	392.0658	244.1123	236.2985	199.9502	232.5448	Down Regulated
ENSG00000278467	ENSG00000278467.1		223994262	223995196	1	lncRNA	novel transcript	59.62489	-0.5470305	0.2201319	0.001186175	0.01636792	90	156	64	78	52	56	80.22744	130.6886	67.63285	70.08093	64.5802	62.91067	Down Regulated
ENSG00000272645	ENSG00000272645.3	GTF2IP20	223982754	223988154	-1	mRNA	general transcription factor IIi pseudogene 20 [Source:HGNC Symbol;Acc:HGNC:51732]	258.1285	-0.4043171	0.1450903	0.0009337445	0.01338477	251	273	150	205	113	150	223.7454	228.705	158.5145	184.1871	140.3377	168.5107	Down Regulated
ENSG00000229124	ENSG00000229124.6	VIM-AS1	17214239	17230018	-1	lncRNA	VIM antisense RNA 1 [Source:HGNC Symbol;Acc:HGNC:44879]	407.5224	1.177194	0.1863516	1.28e-11	1.26e-09	370	395	714	892	568	750	329.8239	330.9102	754.5289	801.4384	705.4145	842.5536	Up Regulated
ENSG00000026025	ENSG00000026025.16	VIM	17228241	17237593	1	mRNA	vimentin [Source:HGNC Symbol;Acc:HGNC:12692]	15112.81	1.009891	0.1258858	5.628224e-17	1.154752e-14	14060	14452	24329	27471	21188	21930	12533.31	12107.12	25709.99	24681.97	26313.95	24636.27	Up Regulated
ENSG00000268403	ENSG00000268403.2		9459549	9460702	-1	lncRNA	novel transcript, antisense to ZNF143	117.8179	0.6970692	0.190831	1.91e-05	0.000484764	149	161	233	226	200	199	132.821	134.8773	246.2258	203.055	248.3854	223.5575	Up Regulated
ENSG00000166478	ENSG00000166478.10	ZNF143	9460319	9528524	1	mRNA	zinc finger protein 143 [Source:HGNC Symbol;Acc:HGNC:12928]	617.2776	0.2155398	0.08011259	0.003493918	0.03920909	885	985	987	1009	768	809	788.9032	825.1811	1043.025	906.5598	953.7999	908.8345	Up Regulated
ENSG00000255521	ENSG00000255521.1	CD44-DT	35132655	35138951	-1	lncRNA	CD44 divergent transcript [Source:HGNC Symbol;Acc:HGNC:56175]	17.79268	4.684066	0.831733	7.51e-10	5.7e-08	2	7	98	113	114	120	1.782832	5.864231	103.5628	101.5275	141.5797	134.8086	Up Regulated
ENSG00000026508	ENSG00000026508.18	CD44	35138882	35232402	1	mRNA	CD44 molecule (Indian blood group) [Source:HGNC Symbol;Acc:HGNC:1681]	4895.568	0.5884532	0.3117218	0.003319489	0.03758387	5909	6940	9287	9952	7669	9016	5267.377	5813.966	9814.16	8941.608	9524.338	10128.62	Up Regulated
ENSG00000244926	ENSG00000244926.6	ALKBH3-AS1	43909289	43920944	-1	lncRNA	ALKBH3 antisense RNA 1 [Source:HGNC Symbol;Acc:HGNC:48670]	21.67046	-1.342687	0.3869548	2.76e-05	0.000667494	35	51	19	9	8	12	31.19956	42.72511	20.0785	8.086261	9.935416	13.48086	Down Regulated
ENSG00000187479	ENSG00000187479.7	C11orf96	43942637	43943878	1	mRNA	chromosome 11 open reading frame 96 [Source:HGNC Symbol;Acc:HGNC:38675]	29.43031	3.961718	0.6634353	1.935544e-10	1.631318e-08	4	5	71	95	43	60	3.565664	4.188737	75.03019	85.35498	53.40286	67.40429	Up Regulated
ENSG00000279491	ENSG00000279491.1		61967729	61969490	1	lncRNA	TEC	80.32739	1.111547	0.2178874	1.97e-08	1.09e-06	65	67	141	124	103	118	57.94204	56.12907	149.0036	111.4107	127.9185	132.5618	Up Regulated
ENSG00000167995	ENSG00000167995.16	BEST1	61950063	61965515	1	mRNA	bestrophin 1 [Source:HGNC Symbol;Acc:HGNC:12703]	1417.908	0.4205089	0.1167753	5.13848e-05	0.001152018	1658	1836	1960	2391	1627	1854	1477.968	1538.104	2071.256	2148.25	2020.615	2082.792	Up Regulated
ENSG00000254510	ENSG00000254510.1		66409158	66417227	1	lncRNA	novel transcript	47.30638	1.226208	0.3163189	7.2e-06	0.000204881	21	15	40	43	31	37	18.71974	12.56621	42.27053	38.63436	38.49974	41.56598	Up Regulated
ENSG00000174576	ENSG00000174576.10	NPAS4	66421004	66426707	1	mRNA	neuronal PAS domain protein 4 [Source:HGNC Symbol;Acc:HGNC:18983]	21.53626	1.788464	0.6218064	0.0002640786	0.004676517	4	5	10	13	16	25	3.565664	4.188737	10.56763	11.68016	19.87083	28.08512	Up Regulated
ENSG00000255517	ENSG00000255517.6	DPP3-DT	66473490	66480296	-1	lncRNA	DPP3 divergent transcript [Source:HGNC Symbol;Acc:HGNC:55494]	129.3356	-0.8907325	0.2409022	1.54e-05	0.00040452	252	216	82	120	82	98	224.6368	180.9534	86.65458	107.8168	101.838	110.0937	Down Regulated
ENSG00000174516	ENSG00000174516.15	PELI3	66466327	66477337	1	mRNA	pellino E3 ubiquitin protein ligase family member 3 [Source:HGNC Symbol;Acc:HGNC:30010]	406.747	-0.603375	0.2474488	0.00130626	0.01784315	755	710	360	454	254	364	673.0191	594.8006	380.4348	407.907	315.4494	408.9193	Down Regulated
ENSG00000258449	ENSG00000258449.1		25096868	25100980	-1	lncRNA	novel transcript, antisense to LRMP	19.05854	-3.463853	0.8143372	3.89e-06	0.00012004	17	18	2	1	0	1	15.15407	15.07945	2.113526	0.8984735	0	1.123405	Down Regulated
ENSG00000258546	ENSG00000258546.1	CENPUP2	25092715	25093900	-1	mRNA	centromere protein U pseudogene 2 [Source:HGNC Symbol;Acc:HGNC:49890]	60.70921	-3.04027	0.5008206	1.404344e-10	1.213832e-08	40	44	5	7	1	2	35.65664	36.86088	5.283816	6.289314	1.241927	2.24681	Down Regulated
ENSG00000258449	ENSG00000258449.1		25096868	25100980	-1	lncRNA	novel transcript, antisense to LRMP	19.05854	-3.463853	0.8143372	3.89e-06	0.00012004	17	18	2	1	0	1	15.15407	15.07945	2.113526	0.8984735	0	1.123405	Down Regulated
ENSG00000118308	ENSG00000118308.15	IRAG2	25004342	25108335	1	mRNA	inositol 1,4,5-triphosphate receptor associated 2 [Source:HGNC Symbol;Acc:HGNC:6690]	1915.215	-0.5175988	0.1830457	0.0005630484	0.008804188	963	995	498	619	446	523	858.4337	833.5586	526.2681	556.1551	553.8994	587.5407	Down Regulated
ENSG00000276842	ENSG00000276842.1		25103124	25103869	-1	lncRNA	novel transcript, antisense to LRMP	110.8622	-1.134483	0.3267858	2.97e-05	0.000711275	64	79	22	34	27	12	57.05063	66.18204	23.24879	30.5481	33.53203	13.48086	Down Regulated
ENSG00000118307	ENSG00000118307.19	DNAI7	25108289	25195162	-1	mRNA	dynein axonemal intermediate chain 7 [Source:HGNC Symbol;Acc:HGNC:29599]	35.83292	-0.7887478	0.3908762	0.002427196	0.02920687	44	45	18	18	19	15	39.22231	37.69863	19.02174	16.17252	23.59661	16.85107	Down Regulated
ENSG00000276842	ENSG00000276842.1		25103124	25103869	-1	lncRNA	novel transcript, antisense to LRMP	110.8622	-1.134483	0.3267858	2.97e-05	0.000711275	64	79	22	34	27	12	57.05063	66.18204	23.24879	30.5481	33.53203	13.48086	Down Regulated
ENSG00000118308	ENSG00000118308.15	IRAG2	25004342	25108335	1	mRNA	inositol 1,4,5-triphosphate receptor associated 2 [Source:HGNC Symbol;Acc:HGNC:6690]	1915.215	-0.5175988	0.1830457	0.0005630484	0.008804188	963	995	498	619	446	523	858.4337	833.5586	526.2681	556.1551	553.8994	587.5407	Down Regulated
ENSG00000258137	ENSG00000258137.5	GPR84-AS1	54353661	54497688	1	lncRNA	GPR84, ZNF385A, ITGA5 and GTSF1 antisense RNA 1 [Source:HGNC Symbol;Acc:HGNC:56187]	32.87882	1.096947	0.3496555	7.52e-05	0.001598961	39	38	70	85	74	72	34.76523	31.8344	73.97343	76.37025	91.90259	80.88514	Up Regulated
ENSG00000139572	ENSG00000139572.4	GPR84	54362445	54364487	-1	mRNA	G protein-coupled receptor 84 [Source:HGNC Symbol;Acc:HGNC:4535]	689.1659	1.4191	0.1612079	5.730691e-20	1.511712e-17	965	1005	2425	2578	1832	1941	860.2165	841.9361	2562.651	2316.265	2275.21	2180.529	Up Regulated
ENSG00000258086	ENSG00000258086.1	GPR84-AS1	54353792	54466985	1	lncRNA	GPR84, ZNF385A, ITGA5 and GTSF1 antisense RNA 1 [Source:HGNC Symbol;Acc:HGNC:56187]	160.99	1.14053	0.2121547	3.6e-09	2.33e-07	271	300	492	587	471	581	241.5737	251.3242	519.9275	527.4039	584.9476	652.6982	Up Regulated
ENSG00000139572	ENSG00000139572.4	GPR84	54362445	54364487	-1	mRNA	G protein-coupled receptor 84 [Source:HGNC Symbol;Acc:HGNC:4535]	689.1659	1.4191	0.1612079	5.730691e-20	1.511712e-17	965	1005	2425	2578	1832	1941	860.2165	841.9361	2562.651	2316.265	2275.21	2180.529	Up Regulated
ENSG00000277895	ENSG00000277895.1		64451591	64452901	-1	lncRNA	novel transcript, antisense to TBK1	50.89787	2.119768	0.2907998	1.9e-14	2.83e-12	28	27	102	134	78	98	24.95965	22.61918	107.7898	120.3954	96.8703	110.0937	Up Regulated
ENSG00000183735	ENSG00000183735.10	TBK1	64452090	64502114	1	mRNA	TANK binding kinase 1 [Source:HGNC Symbol;Acc:HGNC:11584]	1606.272	0.3716393	0.1077475	0.0001141091	0.002272337	1902	1945	2015	2471	1693	2127	1695.473	1629.419	2129.378	2220.128	2102.582	2389.482	Up Regulated
ENSG00000274021	ENSG00000274021.1		89351015	89353271	1	lncRNA	novel transcript, antisense to DUSP6	160.5712	1.492156	0.175298	8.47e-19	1.98e-16	149	126	329	379	261	325	132.821	105.5562	347.6751	340.5215	324.1429	365.1066	Up Regulated
ENSG00000139318	ENSG00000139318.8	DUSP6	89347235	89352501	-1	mRNA	dual specificity phosphatase 6 [Source:HGNC Symbol;Acc:HGNC:3072]	16562.17	0.4461527	0.1093582	6.717921e-06	0.0001932782	25342	24929	29252	33703	24420	26803	22590.27	20884.2	30912.44	30281.25	30327.86	30110.62	Up Regulated
ENSG00000245904	ENSG00000245904.3	BTG1-DT	92145573	92226557	1	lncRNA	BTG1 divergent transcript [Source:HGNC Symbol;Acc:HGNC:55600]	162.1614	0.5693119	0.2083237	0.000528871	0.008432048	179	223	271	290	224	253	159.5635	186.8177	286.3828	260.5573	278.1916	284.2214	Up Regulated
ENSG00000133639	ENSG00000133639.5	BTG1	92140278	92145846	-1	mRNA	BTG anti-proliferation factor 1 [Source:HGNC Symbol;Acc:HGNC:1130]	8553.42	0.5462042	0.1201641	5.868981e-07	2.301366e-05	12074	13318	17419	17266	13016	14058	10762.96	11157.12	18407.76	15513.04	16164.92	15792.82	Up Regulated
ENSG00000285621	ENSG00000285621.1		33335497	33349619	1	lncRNA	novel transcript, antisense to STARD13	293.5974	-0.6331032	0.2159519	0.000304658	0.005271053	258	419	152	187	113	202	229.9853	351.0161	160.628	168.0145	140.3377	226.9278	Down Regulated
ENSG00000133121	ENSG00000133121.21	STARD13	33103137	33350630	-1	mRNA	StAR related lipid transfer domain containing 13 [Source:HGNC Symbol;Acc:HGNC:19164]	2556.057	0.2529551	0.09148917	0.002191637	0.02694705	2233	2272	2184	2688	1945	2084	1990.532	1903.362	2307.971	2415.097	2415.548	2341.176	Up Regulated
ENSG00000258441	ENSG00000258441.1	LINC00641	21200079	21206900	-1	lncRNA	long intergenic non-protein coding RNA 641 [Source:HGNC Symbol;Acc:HGNC:27511]	1137.749	0.7116917	0.1694706	1.88e-06	6.34e-05	820	986	1173	1391	1106	1316	730.9612	826.0189	1239.583	1249.777	1373.571	1478.401	Up Regulated
ENSG00000092199	ENSG00000092199.17	HNRNPC	21209136	21269494	-1	mRNA	heterogeneous nuclear ribonucleoprotein C [Source:HGNC Symbol;Acc:HGNC:5035]	9567.904	0.2544281	0.06992861	0.0001101893	0.002207263	13165	12841	12753	14579	11488	12037	11735.49	10757.51	13476.9	13098.85	14267.26	13522.42	Up Regulated
ENSG00000259116	ENSG00000259116.2	HSPA2-AS1	64513952	64540368	-1	lncRNA	HSPA2 and ZBTB1 antisense RNA 1 [Source:HGNC Symbol;Acc:HGNC:55433]	63.46445	-0.7598606	0.2502284	0.000187693	0.003481672	65	107	31	42	27	51	57.94204	89.63896	32.75966	37.73589	33.53203	57.29364	Down Regulated
ENSG00000126803	ENSG00000126803.9	HSPA2	64535905	64546173	1	mRNA	heat shock protein family A (Hsp70) member 2 [Source:HGNC Symbol;Acc:HGNC:5235]	59.92875	-0.7748038	0.3160141	0.0008666642	0.01260106	48	65	17	36	9	33	42.78797	54.45358	17.96497	32.34505	11.17734	37.07236	Down Regulated
ENSG00000256705	ENSG00000256705.3		101833435	101839531	-1	lncRNA	novel transcript, antisense to PPP2R5C	23.35505	-1.51652	0.414525	1.39e-05	0.000367549	21	34	7	3	7	10	18.71974	28.48341	7.397343	2.69542	8.693489	11.23405	Down Regulated
ENSG00000259161	ENSG00000259161.2	NPM1P20	101843394	101844122	-1	mRNA	nucleophosmin 1 pseudogene 20 [Source:HGNC Symbol;Acc:HGNC:20140]	20.61939	-2.259485	0.4819807	2.137874e-07	9.278739e-06	23	34	3	8	3	3	20.50257	28.48341	3.17029	7.187788	3.725781	3.370214	Down Regulated
ENSG00000252690	ENSG00000252690.3		82752884	82757208	1	lncRNA	TEC	23.51731	-1.60908	0.3146301	1.69e-08	9.52e-07	63	104	22	19	18	22	56.15921	87.12572	23.24879	17.071	22.35468	24.71491	Down Regulated
ENSG00000186628	ENSG00000186628.12	FSD2	82755362	82806070	-1	mRNA	fibronectin type III and SPRY domain containing 2 [Source:HGNC Symbol;Acc:HGNC:18024]	71.85203	-0.8221196	0.1676809	7.084943e-08	3.467695e-06	135	147	53	69	65	61	120.3412	123.1489	56.00845	61.99467	80.72525	68.52769	Down Regulated
ENSG00000260608	ENSG00000260608.1		83012661	83061845	1	lncRNA	novel transcript, antisense to BTBD1	30.92332	-1.393016	0.3103284	4.65e-07	1.86e-05	42	44	9	15	12	13	37.43947	36.86088	9.510869	13.4771	14.90312	14.60426	Down Regulated
ENSG00000259308	ENSG00000259308.3	FABP5P8	83044368	83044771	1	mRNA	fatty acid binding protein 5 pseudogene 8 [Source:HGNC Symbol;Acc:HGNC:31063]	15.81309	-1.641975	0.5078992	6.868136e-05	0.001484102	21	16	3	3	3	7	18.71974	13.40396	3.17029	2.69542	3.725781	7.863833	Down Regulated
ENSG00000260608	ENSG00000260608.1		83012661	83061845	1	lncRNA	novel transcript, antisense to BTBD1	30.92332	-1.393016	0.3103284	4.65e-07	1.86e-05	42	44	9	15	12	13	37.43947	36.86088	9.510869	13.4771	14.90312	14.60426	Down Regulated
ENSG00000169609	ENSG00000169609.14	C15orf40	82988441	83011641	-1	mRNA	chromosome 15 open reading frame 40 [Source:HGNC Symbol;Acc:HGNC:28443]	436.7652	-0.2723318	0.07654926	0.0001392021	0.002705715	670	670	433	520	392	431	597.2488	561.2907	457.5785	467.2062	486.8354	484.1875	Down Regulated
ENSG00000274215	ENSG00000274215.1		92808451	92809057	1	lncRNA	novel transcript	11.6167	2.975261	0.6651127	6.49e-07	2.52e-05	5	3	27	41	21	36	4.45708	2.513242	28.53261	36.83741	26.08047	40.44257	Up Regulated
ENSG00000185442	ENSG00000185442.13	FAM174B	92617448	92809884	-1	mRNA	family with sequence similarity 174 member B [Source:HGNC Symbol;Acc:HGNC:34339]	84.93612	0.6644563	0.2014552	9.110341e-05	0.001869918	75	87	110	155	83	98	66.8562	72.88402	116.244	139.2634	103.0799	110.0937	Up Regulated
ENSG00000272888	ENSG00000272888.6	CHASERR	92819540	92899701	1	lncRNA	CHD2 adjacent suppressive regulatory RNA [Source:HGNC Symbol;Acc:HGNC:48626]	2733.714	0.5794839	0.1383574	2.67e-06	8.63e-05	2924	2991	3679	4296	3215	3646	2606.501	2505.702	3887.832	3859.842	3992.795	4095.934	Up Regulated
ENSG00000173575	ENSG00000173575.21	CHD2	92886203	93027996	1	mRNA	chromodomain helicase DNA binding protein 2 [Source:HGNC Symbol;Acc:HGNC:1917]	6291.513	0.2068195	0.06591427	0.0008935053	0.01288983	7021	7581	6660	7995	5912	7012	6258.632	6350.963	7038.043	7183.296	7342.272	7877.314	Up Regulated
ENSG00000259583	ENSG00000259583.2	ALDH1A3-AS1	100892343	100919391	-1	lncRNA	ALDH1A3 antisense RNA 1 [Source:HGNC Symbol;Acc:HGNC:55416]	55.12978	-0.8949062	0.214123	2.31e-06	7.6e-05	104	79	27	57	42	26	92.70727	66.18204	28.53261	51.21299	52.16093	29.20852	Down Regulated
ENSG00000184254	ENSG00000184254.17	ALDH1A3	100877714	100916626	1	mRNA	aldehyde dehydrogenase 1 family member A3 [Source:HGNC Symbol;Acc:HGNC:409]	21.41923	-0.7559807	0.4046534	0.003158453	0.0361462	27	37	11	18	9	13	24.06823	30.99665	11.6244	16.17252	11.17734	14.60426	Down Regulated
ENSG00000260719	ENSG00000260719.1		29745247	29748299	1	lncRNA	novel transcript, antisense to C16orf54	70.59176	-1.554439	0.2832529	2.48e-09	1.67e-07	100	73	19	28	18	25	89.1416	61.15556	20.0785	25.15726	22.35468	28.08512	Down Regulated
ENSG00000185905	ENSG00000185905.4	C16orf54	29742463	29745990	-1	mRNA	chromosome 16 open reading frame 54 [Source:HGNC Symbol;Acc:HGNC:26649]	2908.894	-0.4335535	0.169846	0.001653151	0.02164978	3867	3829	2034	2829	1845	2062	3447.106	3207.735	2149.456	2541.782	2291.355	2316.461	Down Regulated
ENSG00000260167	ENSG00000260167.1		30585907	30608593	1	lncRNA	novel transcript, antisense to ZNF689	21.09235	-2.148671	0.4021974	6.23e-09	3.82e-07	30	52	6	5	5	11	26.74248	43.56286	6.340579	4.492367	6.209635	12.35745	Down Regulated
ENSG00000197162	ENSG00000197162.9	ZNF785	30573740	30585769	-1	mRNA	zinc finger protein 785 [Source:HGNC Symbol;Acc:HGNC:26496]	165.2264	-1.003646	0.1489603	1.157132e-12	1.305759e-10	245	262	105	114	90	90	218.3969	219.4898	110.9601	102.426	111.7734	101.1064	Down Regulated
ENSG00000260616	ENSG00000260616.6		50783859	50803338	-1	lncRNA	novel transcript, antisense to CYLD	13.29731	1.613939	0.552411	0.000169189	0.003195615	5	11	22	28	18	30	4.45708	9.215221	23.24879	25.15726	22.35468	33.70214	Up Regulated
ENSG00000083799	ENSG00000083799.17	CYLD	50742050	50801935	1	mRNA	CYLD lysine 63 deubiquitinase [Source:HGNC Symbol;Acc:HGNC:2584]	2104.549	0.4737201	0.1177734	7.699033e-06	0.000216897	2405	2397	2944	3132	2385	2662	2143.856	2008.08	3111.111	2814.019	2961.996	2990.504	Up Regulated
ENSG00000261270	ENSG00000261270.1		56940278	56941342	1	lncRNA	novel transcript, sense intronic to HERPUD1	37.45515	-0.9352615	0.2474907	9.94e-06	0.000275421	58	77	28	28	22	28	51.70213	64.50654	29.58937	25.15726	27.32239	31.45533	Down Regulated
ENSG00000051108	ENSG00000051108.15	HERPUD1	56932142	56944864	1	mRNA	homocysteine inducible ER protein with ubiquitin like domain 1 [Source:HGNC Symbol;Acc:HGNC:13744]	1965.459	-0.2045754	0.05711269	0.0001285213	0.002514957	2014	2222	1496	1785	1245	1381	1795.312	1861.475	1580.918	1603.775	1546.199	1551.422	Down Regulated
ENSG00000277978	ENSG00000277978.1		66565620	66566001	-1	lncRNA	novel transcript, antisense to CKLF	17.63967	-1.211921	0.4101294	0.000153291	0.002942963	23	36	10	5	12	8	20.50257	30.1589	10.56763	4.492367	14.90312	8.987238	Down Regulated
ENSG00000217555	ENSG00000217555.12	CKLF	66552563	66566251	1	mRNA	chemokine like factor [Source:HGNC Symbol;Acc:HGNC:13253]	19.57646	-2.132759	0.4768274	4.799259e-07	1.911423e-05	32	40	7	1	7	8	28.52531	33.50989	7.397343	0.8984735	8.693489	8.987238	Down Regulated
ENSG00000261226	ENSG00000261226.1		88936779	88939651	-1	lncRNA	novel transcript	28.59902	1.238201	0.4726394	0.000388832	0.006484365	8	19	36	41	17	32	7.131328	15.9172	38.04348	36.83741	21.11276	35.94895	Up Regulated
ENSG00000129993	ENSG00000129993.14	CBFA2T3	88874858	88977207	-1	mRNA	CBFA2/RUNX1 partner transcriptional co-repressor 3 [Source:HGNC Symbol;Acc:HGNC:1537]	114.5603	0.8964646	0.2839932	8.549181e-05	0.001793915	53	51	67	101	88	89	47.24505	42.72511	70.80314	90.74582	109.2896	99.98302	Up Regulated
ENSG00000205018	ENSG00000205018.2		88939789	88951524	1	lncRNA	novel transcript, antisense to CBFA2T3	16.85479	1.669037	0.5307511	8.28e-05	0.001745601	6	11	29	22	26	28	5.348496	9.215221	30.64613	19.76642	32.2901	31.45533	Up Regulated
ENSG00000129993	ENSG00000129993.14	CBFA2T3	88874858	88977207	-1	mRNA	CBFA2/RUNX1 partner transcriptional co-repressor 3 [Source:HGNC Symbol;Acc:HGNC:1537]	114.5603	0.8964646	0.2839932	8.549181e-05	0.001793915	53	51	67	101	88	89	47.24505	42.72511	70.80314	90.74582	109.2896	99.98302	Up Regulated
ENSG00000266709	ENSG00000266709.1		14303854	14305505	1	lncRNA	novel transcript	54.22144	1.516406	0.3435533	3.89e-07	1.59e-05	64	49	149	159	124	145	57.05063	41.04962	157.4577	142.8573	153.9989	162.8937	Up Regulated
ENSG00000125430	ENSG00000125430.9	HS3ST3B1	14301081	14349404	1	mRNA	heparan sulfate-glucosamine 3-sulfotransferase 3B1 [Source:HGNC Symbol;Acc:HGNC:5198]	391.6451	0.5835676	0.2325577	0.0008882766	0.01286007	473	616	849	742	642	635	421.6398	516.0524	897.192	666.6673	797.3171	713.362	Up Regulated
ENSG00000266378	ENSG00000266378.1		14327335	14329474	1	lncRNA	novel transcript	13.8252	1.270029	0.5587195	0.00088718	0.01285336	7	14	27	30	15	33	6.239912	11.72846	28.53261	26.9542	18.6289	37.07236	Up Regulated
ENSG00000125430	ENSG00000125430.9	HS3ST3B1	14301081	14349404	1	mRNA	heparan sulfate-glucosamine 3-sulfotransferase 3B1 [Source:HGNC Symbol;Acc:HGNC:5198]	391.6451	0.5835676	0.2325577	0.0008882766	0.01286007	473	616	849	742	642	635	421.6398	516.0524	897.192	666.6673	797.3171	713.362	Up Regulated
ENSG00000263990	ENSG00000263990.1		31873926	31886666	1	lncRNA	novel transcript	45.69804	-0.6513735	0.2415829	0.000497818	0.008018785	57	75	30	34	27	33	50.81071	62.83105	31.7029	30.5481	33.53203	37.07236	Down Regulated
ENSG00000108651	ENSG00000108651.10	UTP6	31860904	31901708	-1	mRNA	UTP6 small subunit processome component [Source:HGNC Symbol;Acc:HGNC:18279]	1678.015	-0.1825673	0.06198143	0.001970708	0.02486275	2041	2177	1538	1745	1311	1385	1819.38	1823.776	1625.302	1567.836	1628.166	1555.916	Down Regulated
ENSG00000229980	ENSG00000229980.4	TOB1-AS1	50866679	50910774	1	lncRNA	TOB1 antisense RNA 1 [Source:HGNC Symbol;Acc:HGNC:44340]	21.96485	-1.643072	0.4304017	7.98e-06	0.000223747	21	32	7	7	4	6	18.71974	26.80791	7.397343	6.289314	4.967708	6.740429	Down Regulated
ENSG00000141232	ENSG00000141232.5	TOB1	50862223	50867978	-1	mRNA	transducer of ERBB2, 1 [Source:HGNC Symbol;Acc:HGNC:11979]	539.4291	0.2982992	0.1239088	0.004474157	0.04735752	375	399	376	475	374	374	334.281	334.2612	397.343	426.7749	464.4807	420.1534	Up Regulated
ENSG00000263847	ENSG00000263847.1		9112404	9115877	-1	lncRNA	novel transcript, antisense to NDUFV2	37.77498	-0.9429896	0.2596683	1.58e-05	0.000414338	70	60	28	27	16	30	62.39912	50.26484	29.58937	24.25878	19.87083	33.70214	Down Regulated
ENSG00000178127	ENSG00000178127.13	NDUFV2	9102630	9134345	1	mRNA	NADH:ubiquinone oxidoreductase core subunit V2 [Source:HGNC Symbol;Acc:HGNC:7717]	157.1832	-1.27126	0.1619954	2.757162e-16	5.185508e-14	287	310	99	93	94	102	255.8364	259.7017	104.6196	83.55804	116.7411	114.5873	Down Regulated
ENSG00000266053	ENSG00000266053.2	NDUFV2-AS1	9121179	9136645	-1	lncRNA	NDUFV2 antisense RNA 1 [Source:HGNC Symbol;Acc:HGNC:50826]	32.51239	-1.002894	0.2337105	1.15e-06	4.18e-05	72	84	22	45	22	30	64.18196	70.37078	23.24879	40.43131	27.32239	33.70214	Down Regulated
ENSG00000178127	ENSG00000178127.13	NDUFV2	9102630	9134345	1	mRNA	NADH:ubiquinone oxidoreductase core subunit V2 [Source:HGNC Symbol;Acc:HGNC:7717]	157.1832	-1.27126	0.1619954	2.757162e-16	5.185508e-14	287	310	99	93	94	102	255.8364	259.7017	104.6196	83.55804	116.7411	114.5873	Down Regulated
ENSG00000265778	ENSG00000265778.2	ZNF516-AS1	76491629	76493920	1	lncRNA	ZNF516 antisense RNA 1 [Source:HGNC Symbol;Acc:HGNC:55324]	61.26417	-1.024076	0.2433609	1.59e-06	5.52e-05	72	93	42	22	26	32	64.18196	77.9105	44.38406	19.76642	32.2901	35.94895	Down Regulated
ENSG00000101493	ENSG00000101493.11	ZNF516	76357682	76495242	-1	mRNA	zinc finger protein 516 [Source:HGNC Symbol;Acc:HGNC:28990]	3364.487	0.3136064	0.1208613	0.002412435	0.02908322	3936	3941	4216	4724	3736	3738	3508.614	3301.562	4455.314	4244.389	4639.839	4199.287	Up Regulated
ENSG00000267607	ENSG00000267607.1	ICAM4-AS1	10285801	10289019	-1	lncRNA	ICAM4 antisense RNA 1 [Source:HGNC Symbol;Acc:HGNC:55990]	19.9443	2.269146	0.5666838	2.01e-06	6.7e-05	14	19	90	74	75	63	12.47982	15.9172	95.10869	66.48704	93.14452	70.7745	Up Regulated
ENSG00000090339	ENSG00000090339.9	ICAM1	10271093	10286615	1	mRNA	intercellular adhesion molecule 1 [Source:HGNC Symbol;Acc:HGNC:5344]	3301.38	1.255707	0.3098247	1.854274e-06	6.287816e-05	5001	5145	11184	11467	9373	10763	4457.972	4310.21	11818.84	10302.8	11640.58	12091.21	Up Regulated
ENSG00000229951	ENSG00000229951.5	FOSL2-AS1	28384409	28394680	-1	lncRNA	FOSL2 antisense RNA 1 [Source:HGNC Symbol;Acc:HGNC:55784]	22.32266	3.710663	0.4162234	1.22e-19	3.1e-17	6	9	90	101	61	89	5.348496	7.539726	95.10869	90.74582	75.75754	99.98302	Up Regulated
ENSG00000075426	ENSG00000075426.12	FOSL2	28392448	28417317	1	mRNA	FOS like 2, AP-1 transcription factor subunit [Source:HGNC Symbol;Acc:HGNC:3798]	3910.801	0.860864	0.1788306	8.454144e-08	4.050013e-06	3316	3830	6300	5697	4844	5006	2955.936	3208.572	6657.608	5118.604	6015.894	5623.764	Up Regulated
ENSG00000270640	ENSG00000270640.1		28396815	28397110	1	lncRNA	novel transcript, sense intronic to FOSL2	56.76755	3.908287	0.3838285	1.53e-25	7.41e-23	13	20	276	196	166	202	11.58841	16.75495	291.6666	176.1008	206.1599	226.9278	Up Regulated
ENSG00000075426	ENSG00000075426.12	FOSL2	28392448	28417317	1	mRNA	FOS like 2, AP-1 transcription factor subunit [Source:HGNC Symbol;Acc:HGNC:3798]	3910.801	0.860864	0.1788306	8.454144e-08	4.050013e-06	3316	3830	6300	5697	4844	5006	2955.936	3208.572	6657.608	5118.604	6015.894	5623.764	Up Regulated
ENSG00000279873	ENSG00000279873.2	LINC01126	43227210	43228855	1	lncRNA	long intergenic non-protein coding RNA 1126 [Source:HGNC Symbol;Acc:HGNC:49275]	71.37043	-1.396521	0.2619877	4.78e-09	3e-07	49	75	11	21	24	15	43.67939	62.83105	11.6244	18.86794	29.80625	16.85107	Down Regulated
ENSG00000152518	ENSG00000152518.8	ZFP36L2	43222402	43226606	-1	mRNA	ZFP36 ring finger protein like 2 [Source:HGNC Symbol;Acc:HGNC:1108]	2923.67	0.4497517	0.1450824	0.0002615125	0.004643219	669	699	823	952	674	723	596.3573	585.5854	869.7161	855.3468	837.0588	812.2217	Up Regulated
ENSG00000203395	ENSG00000203395.2		68361214	68365584	-1	lncRNA	novel transcript, antisense to PLEK	112.2845	3.286876	0.3001219	5.75e-29	3.89e-26	22	19	179	197	125	176	19.61115	15.9172	189.1606	176.9993	155.2409	197.7192	Up Regulated
ENSG00000115956	ENSG00000115956.10	PLEK	68365282	68397453	1	mRNA	pleckstrin [Source:HGNC Symbol;Acc:HGNC:9070]	12754.7	0.5402828	0.1566545	5.564561e-05	0.001239335	12477	12689	16696	17641	13573	14182	11122.2	10630.18	17643.72	15849.97	16856.67	15932.13	Up Regulated
ENSG00000172965	ENSG00000172965.15	MIR4435-2HG	111006015	111523376	-1	lncRNA	MIR4435-2 host gene [Source:HGNC Symbol;Acc:HGNC:35163]	1231.612	0.4554872	0.07570821	2.84e-10	2.3e-08	1627	1840	2074	2230	1659	1837	1450.334	1541.455	2191.727	2003.596	2060.357	2063.695	Up Regulated
ENSG00000153094	ENSG00000153094.23	BCL2L11	111119378	111168445	1	mRNA	BCL2 like 11 [Source:HGNC Symbol;Acc:HGNC:994]	1216.02	0.3513038	0.1497355	0.003708762	0.04089706	575	526	579	721	513	590	512.5642	440.6551	611.8659	647.7994	637.1085	662.8088	Up Regulated
ENSG00000280228	ENSG00000280228.1		112840328	112844195	1	lncRNA	TEC	51.60995	5.936276	0.659216	1.28e-19	3.2e-17	2	4	176	187	150	148	1.782832	3.350989	185.9903	168.0145	186.289	166.2639	Up Regulated
ENSG00000125538	ENSG00000125538.11	IL1B	112829751	112836816	-1	mRNA	interleukin 1 beta [Source:HGNC Symbol;Acc:HGNC:5992]	10237.06	3.885071	0.5107251	5.123922e-16	9.461554e-14	3334	3535	48620	49016	39335	42196	2971.981	2961.437	51379.83	44039.58	48851.2	47403.19	Up Regulated
ENSG00000236859	ENSG00000236859.6	NIFK-AS1	121649320	121728563	1	lncRNA	NIFK antisense RNA 1 [Source:HGNC Symbol;Acc:HGNC:27385]	129.9207	-0.5591826	0.1336062	3.24e-06	0.000102736	203	223	123	118	96	116	180.9575	186.8177	129.9819	106.0199	119.225	130.315	Down Regulated
ENSG00000074054	ENSG00000074054.18	CLASP1	121337776	121649476	-1	mRNA	cytoplasmic linker associated protein 1 [Source:HGNC Symbol;Acc:HGNC:17088]	1870.7	0.1636488	0.04995205	0.0007092986	0.01071173	1737	1949	1715	2036	1454	1536	1548.39	1632.77	1812.349	1829.292	1805.762	1725.55	Up Regulated
ENSG00000283118	ENSG00000283118.1		144444848	144450450	1	lncRNA	novel transcript, antisense to ZEB2	538.2133	0.5116591	0.1841544	0.000548514	0.008663617	405	587	616	690	497	628	361.0235	491.7577	650.9661	619.9467	617.2377	705.4982	Up Regulated
ENSG00000169554	ENSG00000169554.20	ZEB2	144364364	144521057	-1	mRNA	zinc finger E-box binding homeobox 2 [Source:HGNC Symbol;Acc:HGNC:14881]	22212.96	0.6995217	0.08360213	4.866977e-18	1.074544e-15	18182	20853	27167	29089	22610	24829	16207.73	17469.55	28709.09	26135.7	28079.97	27893.02	Up Regulated
ENSG00000279166	ENSG00000279166.1		144494265	144496878	-1	lncRNA	TEC	2762.305	0.8617564	0.1407858	5.71e-11	5.23e-09	1946	2696	3373	4092	3061	3471	1734.696	2258.567	3564.462	3676.554	3801.538	3899.338	Up Regulated
ENSG00000169554	ENSG00000169554.20	ZEB2	144364364	144521057	-1	mRNA	zinc finger E-box binding homeobox 2 [Source:HGNC Symbol;Acc:HGNC:14881]	22212.96	0.6995217	0.08360213	4.866977e-18	1.074544e-15	18182	20853	27167	29089	22610	24829	16207.73	17469.55	28709.09	26135.7	28079.97	27893.02	Up Regulated
ENSG00000238057	ENSG00000238057.9	ZEB2-AS1	144517978	144521477	1	lncRNA	ZEB2 antisense RNA 1 [Source:HGNC Symbol;Acc:HGNC:37149]	764.8641	1.481047	0.1270858	1.01e-32	1.07e-29	491	510	1203	1293	993	1104	437.6853	427.2511	1271.286	1161.726	1233.233	1240.239	Up Regulated
ENSG00000169554	ENSG00000169554.20	ZEB2	144364364	144521057	-1	mRNA	zinc finger E-box binding homeobox 2 [Source:HGNC Symbol;Acc:HGNC:14881]	22212.96	0.6995217	0.08360213	4.866977e-18	1.074544e-15	18182	20853	27167	29089	22610	24829	16207.73	17469.55	28709.09	26135.7	28079.97	27893.02	Up Regulated
ENSG00000224467	ENSG00000224467.1	TANK-AS1	161096231	161160224	-1	lncRNA	TANK antisense RNA 1 [Source:HGNC Symbol;Acc:HGNC:40575]	59.73624	2.149661	0.2969998	2.53e-14	3.57e-12	35	20	103	125	90	102	31.19956	16.75495	108.8466	112.3092	111.7734	114.5873	Up Regulated
ENSG00000136560	ENSG00000136560.13	TANK	161136908	161236230	1	mRNA	TRAF family member associated NFKB activator [Source:HGNC Symbol;Acc:HGNC:11562]	3137.093	0.7605222	0.1329954	7.519521e-10	5.699124e-08	3657	3850	5218	6019	4640	5270	3259.908	3225.327	5514.19	5407.912	5762.541	5920.343	Up Regulated
ENSG00000235724	ENSG00000235724.9	PSMD14-DT	161222785	161308389	-1	lncRNA	PSMD14 divergent transcript [Source:HGNC Symbol;Acc:HGNC:56104]	78.54982	1.447699	0.2509904	3.65e-10	2.91e-08	77	96	178	229	160	239	68.63904	80.42374	188.1039	205.7504	198.7083	268.4937	Up Regulated
ENSG00000136560	ENSG00000136560.13	TANK	161136908	161236230	1	mRNA	TRAF family member associated NFKB activator [Source:HGNC Symbol;Acc:HGNC:11562]	3137.093	0.7605222	0.1329954	7.519521e-10	5.699124e-08	3657	3850	5218	6019	4640	5270	3259.908	3225.327	5514.19	5407.912	5762.541	5920.343	Up Regulated
ENSG00000222043	ENSG00000222043.2		177264359	177265515	1	lncRNA	novel transcript	26.57552	3.041405	0.4725183	2e-11	1.94e-09	7	5	50	52	30	46	6.239912	4.188737	52.83816	46.72062	37.25781	51.67662	Up Regulated
ENSG00000116044	ENSG00000116044.16	NFE2L2	177218667	177392756	-1	mRNA	NFE2 like bZIP transcription factor 2 [Source:HGNC Symbol;Acc:HGNC:7782]	5499.2	1.383531	0.1315495	3.123141e-27	1.812493e-24	4790	5081	10812	12032	9257	10286	4269.883	4256.594	11425.72	10810.43	11496.52	11555.34	Up Regulated
ENSG00000226312	ENSG00000226312.7	CFLAR-AS1	201140278	201157823	-1	lncRNA	CFLAR antisense RNA 1 [Source:HGNC Symbol;Acc:HGNC:14437]	289.5022	0.7279524	0.2848893	0.000554315	0.008714588	292	326	444	509	293	609	260.2935	273.1056	469.2029	457.323	363.8846	684.1535	Up Regulated
ENSG00000235579	ENSG00000235579.1	RPL38P5	201162484	201162680	-1	mRNA	RPL38 pseudogene 5 [Source:HGNC Symbol;Acc:HGNC:54607]	38.74688	1.062065	0.4119553	0.0005886589	0.009141315	10	13	19	35	17	22	8.91416	10.89072	20.0785	31.44657	21.11276	24.71491	Up Regulated
ENSG00000267034	ENSG00000267034.1	AC010980.2	222317242	222318653	-1	lncRNA	novel transcript	56.59017	0.8725631	0.3967062	0.001021909	0.01449513	132	102	258	186	185	189	117.6669	85.45023	272.6449	167.1161	229.7565	212.3235	Up Regulated
ENSG00000237732	ENSG00000237732.9	CT75	222318275	222321512	1	mRNA	cancer/testis associated transcript 75 [Source:HGNC Symbol;Acc:HGNC:37174]	42.1134	0.9928423	0.2873301	2.618163e-05	0.000638417	76	91	190	135	133	128	67.74762	76.23501	200.785	121.2939	165.1763	143.7958	Up Regulated
ENSG00000233538	ENSG00000233538.1		231452195	231453153	1	lncRNA	novel transcript	23.17726	1.036863	0.3631028	0.000244488	0.004371511	18	16	28	38	30	34	16.04549	13.40396	29.58937	34.14199	37.25781	38.19576	Up Regulated
ENSG00000207280	ENSG00000207280.1	SNORD20	231456444	231456523	-1	mRNA	small nucleolar RNA, C/D box 20 [Source:HGNC Symbol;Acc:HGNC:10143]	27.60434	0.7716296	0.2943675	0.0005607197	0.008781294	29	32	62	53	36	39	25.85107	26.80791	65.51932	47.6191	44.70937	43.81279	Up Regulated
ENSG00000275894	ENSG00000275894.1		45345115	45345823	-1	lncRNA	novel transcript, sense intronic to SDC4	61.27293	4.001242	0.4721734	1.18e-18	2.69e-16	12	13	212	171	162	150	10.69699	10.89072	224.0338	153.639	201.1922	168.5107	Up Regulated
ENSG00000124145	ENSG00000124145.6	SDC4	45325288	45348424	-1	mRNA	syndecan 4 [Source:HGNC Symbol;Acc:HGNC:10661]	1212.209	0.517309	0.1623196	0.0001496702	0.002881612	1489	1437	2001	2015	1507	1625	1327.318	1203.843	2114.583	1810.424	1871.584	1825.533	Up Regulated
ENSG00000260583	ENSG00000260583.1		25582770	25583326	-1	lncRNA	novel transcript, antisense to MRPL39	130.9768	4.045975	0.351512	4.75e-32	4.59e-29	28	26	364	439	290	420	24.95965	21.78143	384.6618	394.4299	360.1588	471.83	Up Regulated
ENSG00000154719	ENSG00000154719.13	MRPL39	25585656	25607517	-1	mRNA	mitochondrial ribosomal protein L39 [Source:HGNC Symbol;Acc:HGNC:14027]	285.5422	0.4667045	0.1439227	0.0001554023	0.002975053	358	351	420	483	377	377	319.1269	294.0493	443.8406	433.9627	468.2065	423.5236	Up Regulated
ENSG00000286153	ENSG00000286153.1		34836286	34884882	1	lncRNA	novel transcript, antisense to RUNX1	540.9278	0.4802655	0.1539345	0.000218163	0.003949483	464	513	568	658	521	562	413.617	429.7644	600.2415	591.1956	647.0439	631.3535	Up Regulated
ENSG00000159216	ENSG00000159216.18	RUNX1	34787801	36004667	-1	mRNA	RUNX family transcription factor 1 [Source:HGNC Symbol;Acc:HGNC:10471]	5229.63	0.3273862	0.09882917	0.0002353284	0.004226341	3648	3951	4086	4473	3554	3668	3251.886	3309.94	4317.934	4018.872	4413.808	4120.649	Up Regulated
ENSG00000237232	ENSG00000237232.7	ZNF295-AS1	42009194	42055130	1	lncRNA	ZNF295 antisense RNA 1 [Source:HGNC Symbol;Acc:HGNC:23130]	20.59831	0.6952791	0.4073428	0.003972225	0.04310034	26	29	58	48	33	38	23.17682	24.29467	61.29227	43.12673	40.98359	42.68938	Up Regulated
ENSG00000173276	ENSG00000173276.14	ZBTB21	41986831	42010387	-1	mRNA	zinc finger and BTB domain containing 21 [Source:HGNC Symbol;Acc:HGNC:13083]	1701.077	0.4300119	0.1092688	1.32326e-05	0.0003518071	2238	2456	2701	3049	2364	2393	1994.989	2057.507	2854.317	2739.446	2935.915	2688.308	Up Regulated
ENSG00000178803	ENSG00000178803.11	ADORA2A-AS1	24429206	24495074	-1	lncRNA	ADORA2A antisense RNA 1 [Source:HGNC Symbol;Acc:HGNC:37122]	19.34401	3.074255	0.6677026	1.71e-07	7.54e-06	6	8	58	63	46	62	5.348496	6.701979	61.29227	56.60383	57.12864	69.6511	Up Regulated
ENSG00000128271	ENSG00000128271.22	ADORA2A	24417879	24442357	1	mRNA	adenosine A2a receptor [Source:HGNC Symbol;Acc:HGNC:263]	17.0562	1.544864	0.6982028	0.0007256839	0.01091859	10	12	40	22	28	48	8.91416	10.05297	42.27053	19.76642	34.77395	53.92343	Up Regulated
ENSG00000229955	ENSG00000229955.1		38387918	38388857	-1	lncRNA	novel transcript, sense intronic to CSNK1E	18.98834	-1.647406	0.4609971	2.27e-05	0.00056175	27	22	4	6	7	5	24.06823	18.43044	4.227053	5.390841	8.693489	5.617024	Down Regulated
ENSG00000244627	ENSG00000244627.5	TPTEP2	38361381	38384096	-1	mRNA	TPTE pseudogene 2 [Source:HGNC Symbol;Acc:HGNC:53828]	151.4629	-0.3753072	0.1498404	0.002309672	0.02805865	162	167	96	121	70	106	144.4094	139.9038	101.4493	108.7153	86.93489	119.0809	Down Regulated
ENSG00000206567	ENSG00000206567.9		10004048	10011209	-1	lncRNA	novel transcript	103.5072	-0.4191881	0.1953731	0.004135861	0.04454799	122	129	45	92	68	76	108.7528	108.0694	47.55434	82.65956	84.45103	85.37876	Down Regulated
ENSG00000180385	ENSG00000180385.8	EMC3-AS1	9987904	9994331	1	mRNA	EMC3 antisense RNA 1 [Source:HGNC Symbol;Acc:HGNC:49223]	335.1748	-0.398722	0.1599061	0.002059059	0.02566139	245	277	161	152	114	178	218.3969	232.056	170.1389	136.568	141.5797	199.966	Down Regulated
ENSG00000249786	ENSG00000249786.7	EAF1-AS1	15436171	15455940	-1	lncRNA	EAF1 antisense RNA 1 [Source:HGNC Symbol;Acc:HGNC:42328]	42.29492	0.7157605	0.2623336	0.000454295	0.007451918	42	30	63	55	43	51	37.43947	25.13242	66.57608	49.41604	53.40286	57.29364	Up Regulated
ENSG00000144597	ENSG00000144597.14	EAF1	15427598	15450635	1	mRNA	ELL associated factor 1 [Source:HGNC Symbol;Acc:HGNC:20907]	999.0396	0.3457792	0.1104822	0.0003967295	0.006610639	1512	1611	1673	1920	1448	1575	1347.821	1349.611	1767.965	1725.069	1798.31	1769.363	Up Regulated
ENSG00000284669	ENSG00000284669.1		39148281	39172952	1	lncRNA	novel transcript, antisense CSRNP1	545.0125	3.233207	0.2359215	2.86e-44	5.82e-41	131	145	1050	1252	948	1053	116.7755	121.4734	1109.601	1124.889	1177.347	1182.945	Up Regulated
ENSG00000144655	ENSG00000144655.15	CSRNP1	39141855	39154562	-1	mRNA	cysteine and serine rich nuclear protein 1 [Source:HGNC Symbol;Acc:HGNC:14300]	1535.78	1.953555	0.2661922	6.925105e-15	1.082021e-12	1008	921	3219	3786	2771	2970	898.5474	771.5653	3401.721	3401.621	3441.38	3336.512	Up Regulated
ENSG00000223552	ENSG00000223552.1	CCR5AS	46364391	46407117	-1	lncRNA	CCR5 antisense RNA [Source:HGNC Symbol;Acc:HGNC:54398]	36.45562	2.109793	0.3981656	9.88e-09	5.8e-07	9	12	60	44	23	36	8.022744	10.05297	63.40579	39.53283	28.56432	40.44257	Up Regulated
ENSG00000121797	ENSG00000121797.10	CCRL2	46407166	46412997	1	mRNA	C-C motif chemokine receptor like 2 [Source:HGNC Symbol;Acc:HGNC:1612]	309.3253	1.768108	0.3432474	8.361111e-09	4.995026e-07	255	228	833	772	634	657	227.3111	191.0064	880.2838	693.6215	787.3817	738.0769	Up Regulated
ENSG00000273486	ENSG00000273486.1		136837338	136839021	-1	lncRNA	novel transcript, antisense to SLC35G2	134.5982	-0.5736829	0.1807992	0.000160037	0.003046544	171	187	85	107	70	107	152.4321	156.6588	89.82487	96.13666	86.93489	120.2043	Down Regulated
ENSG00000168917	ENSG00000168917.9	SLC35G2	136818647	136855888	1	mRNA	solute carrier family 35 member G2 [Source:HGNC Symbol;Acc:HGNC:28480]	195.9883	-0.4704819	0.1764913	0.001012594	0.01439315	249	304	147	171	131	158	221.9626	254.6752	155.3442	153.639	162.6924	177.498	Down Regulated
ENSG00000239213	ENSG00000239213.5	NCK1-DT	136835345	136862618	-1	lncRNA	NCK1 divergent transcript [Source:HGNC Symbol;Acc:HGNC:49645]	152.1101	-0.5608105	0.150314	2.13e-05	0.000531364	219	240	125	135	100	124	195.2201	201.0594	132.0954	121.2939	124.1927	139.3022	Down Regulated
ENSG00000168917	ENSG00000168917.9	SLC35G2	136818647	136855888	1	mRNA	solute carrier family 35 member G2 [Source:HGNC Symbol;Acc:HGNC:28480]	195.9883	-0.4704819	0.1764913	0.001012594	0.01439315	249	304	147	171	131	158	221.9626	254.6752	155.3442	153.639	162.6924	177.498	Down Regulated
ENSG00000234197	ENSG00000234197.1	ETV5-AS1	186079170	186080947	1	lncRNA	ETV5 antisense RNA 1 [Source:HGNC Symbol;Acc:HGNC:40222]	102.3749	-0.9114824	0.2413433	1.19e-05	0.000320008	142	159	52	79	48	64	126.5811	133.2018	54.95169	70.97941	59.61249	71.89791	Down Regulated
ENSG00000277118	ENSG00000277118.1	Metazoa_SRP	186076306	186076591	-1	mRNA	Metazoan signal recognition particle RNA [Source:RFAM;Acc:RF00017]	40.45781	-1.612939	0.3464023	2.229438e-07	9.564787e-06	63	74	12	23	10	22	56.15921	61.9933	12.68116	20.66489	12.41927	24.71491	Down Regulated
ENSG00000228804	ENSG00000228804.5		187702313	187733849	1	lncRNA	novel transcript, antisense to RTP2 and BCL6	37.0484	2.180344	0.3011412	2.85e-14	3.99e-12	23	26	85	121	91	84	20.50257	21.78143	89.82487	108.7153	113.0154	94.366	Up Regulated
ENSG00000113916	ENSG00000113916.18	BCL6	187721377	187745725	-1	mRNA	BCL6 transcription repressor [Source:HGNC Symbol;Acc:HGNC:1001]	4037.538	0.8978744	0.1401487	8.776102e-12	8.91301e-10	5131	5203	8768	8974	7189	7095	4573.856	4358.799	9265.7	8062.901	8928.213	7970.557	Up Regulated
ENSG00000273369	ENSG00000273369.1		44693946	44694386	-1	lncRNA	novel transcript, antisense to GUF1	31.9657	-1.194918	0.2919413	2.47e-06	8.07e-05	63	55	16	25	19	17	56.15921	46.0761	16.90821	22.46184	23.59661	19.09788	Down Regulated
ENSG00000163281	ENSG00000163281.11	GNPDA2	44682200	44726588	-1	mRNA	glucosamine-6-phosphate deaminase 2 [Source:HGNC Symbol;Acc:HGNC:21526]	584.2384	-0.3255078	0.1209267	0.001864211	0.02387507	796	819	554	638	397	446	709.5672	686.1151	585.4468	573.2261	493.045	501.0385	Down Regulated
ENSG00000269506	ENSG00000269506.2		54059597	54061210	1	lncRNA	novel transcript, antisense to CHIC2	194.4724	0.7476499	0.2058176	1.89e-05	0.000480355	138	128	185	252	165	174	123.0154	107.2317	195.5012	226.4153	204.9179	195.4724	Up Regulated
ENSG00000109220	ENSG00000109220.11	CHIC2	54009789	54064605	-1	mRNA	cysteine rich hydrophobic domain 2 [Source:HGNC Symbol;Acc:HGNC:1935]	382.843	0.6585399	0.109259	5.456098e-10	4.197889e-08	414	395	515	638	454	484	369.0462	330.9102	544.2331	573.2261	563.8348	543.7279	Up Regulated
ENSG00000260651	ENSG00000260651.1		102500841	102501319	-1	lncRNA	novel transcript, antisense NFKB1	16.56053	3.055104	0.5593217	9.1e-09	5.4e-07	4	4	32	38	32	22	3.565664	3.350989	33.81642	34.14199	39.74166	24.71491	Up Regulated
ENSG00000109320	ENSG00000109320.12	NFKB1	102501330	102617302	1	mRNA	nuclear factor kappa B subunit 1 [Source:HGNC Symbol;Acc:HGNC:7794]	2365.254	0.6572604	0.1935318	4.865042e-05	0.001099281	2792	2966	4046	4388	3564	3587	2488.834	2484.759	4275.664	3942.502	4426.228	4029.653	Up Regulated
ENSG00000250764	ENSG00000250764.1		32103445	32121941	-1	lncRNA	novel transcript	73.09833	-0.6122411	0.2626673	0.001504045	0.0200329	38	70	31	32	17	23	33.87381	58.64231	32.75966	28.75115	21.11276	25.83831	Down Regulated
ENSG00000133401	ENSG00000133401.16	PDZD2	31639131	32110932	1	mRNA	PDZ domain containing 2 [Source:HGNC Symbol;Acc:HGNC:18486]	479.7557	-0.5674435	0.1454741	1.625999e-05	0.0004234267	260	314	145	171	118	175	231.7682	263.0527	153.2307	153.639	146.5474	196.5958	Down Regulated
ENSG00000281357	ENSG00000281357.2	ARRDC3-AS1	91380349	91616105	1	lncRNA	ARRDC3 antisense RNA 1 [Source:HGNC Symbol;Acc:HGNC:44145]	160.9846	0.6430205	0.1313251	9.31e-08	4.39e-06	194	184	253	264	205	263	172.9347	154.1455	267.3611	237.197	254.595	295.4555	Up Regulated
ENSG00000113369	ENSG00000113369.9	ARRDC3	91368631	91383317	-1	mRNA	arrestin domain containing 3 [Source:HGNC Symbol;Acc:HGNC:29263]	7575.342	0.8835475	0.1858913	1.107795e-07	5.056523e-06	14253	13928	25170	25630	17512	20364	12705.35	11668.14	26598.73	23027.88	21748.62	22877.01	Up Regulated
ENSG00000250602	ENSG00000250602.6		126372477	126509021	-1	lncRNA	novel transcript, antisense to GRAMD3	44.26618	1.409062	0.2829596	4.12e-08	2.12e-06	20	32	50	65	58	66	17.82832	26.80791	52.83816	58.40078	72.03176	74.14472	Up Regulated
ENSG00000155324	ENSG00000155324.9	GRAMD2B	126360132	126496494	1	mRNA	GRAM domain containing 2B [Source:HGNC Symbol;Acc:HGNC:24911]	270.5522	0.6789861	0.2025499	8.674562e-05	0.001807156	209	210	285	313	220	327	186.306	175.9269	301.1775	281.2222	273.2239	367.3534	Up Regulated
ENSG00000232295	ENSG00000232295.7		71221457	71328228	-1	lncRNA	novel transcript, antisense OGFRL1	157.1138	3.157911	0.2827452	2.02e-30	1.48e-27	56	78	540	484	479	477	49.9193	65.34429	570.6521	434.8612	594.883	535.8641	Up Regulated
ENSG00000119900	ENSG00000119900.9	OGFRL1	71288811	71309059	1	mRNA	opioid growth factor receptor like 1 [Source:HGNC Symbol;Acc:HGNC:21378]	9304.304	0.86063	0.1761669	5.915525e-08	2.952239e-06	9185	8871	14584	15393	12483	12904	8187.656	7431.657	15411.83	13830.2	15502.97	14496.42	Up Regulated
ENSG00000225793	ENSG00000225793.2	TMEM30A-DT	75284992	75317525	1	lncRNA	TMEM30A divergent transcript [Source:HGNC Symbol;Acc:HGNC:48985]	217.1142	-0.3924441	0.1496438	0.001307189	0.01784384	305	277	159	220	133	174	271.8819	232.056	168.0254	197.6642	165.1763	195.4724	Down Regulated
ENSG00000118407	ENSG00000118407.15	FILIP1	75291859	75493800	-1	mRNA	filamin A interacting protein 1 [Source:HGNC Symbol;Acc:HGNC:21015]	246.4078	-1.025366	0.1480536	3.182378e-13	3.870686e-11	344	350	123	156	106	154	306.6471	293.2116	129.9819	140.1619	131.6443	173.0043	Down Regulated
ENSG00000271730	ENSG00000271730.1		108998482	108999125	1	lncRNA	novel transcript, antisense to SESN1	60.23461	-1.108368	0.2283599	8.04e-08	3.88e-06	113	152	40	67	39	43	100.73	127.3376	42.27053	60.19772	48.43515	48.30641	Down Regulated
ENSG00000080546	ENSG00000080546.13	SESN1	108984309	109094846	-1	mRNA	sestrin 1 [Source:HGNC Symbol;Acc:HGNC:21595]	3773.178	-0.2288928	0.08709463	0.003981352	0.0431763	5411	5461	3632	4565	3061	3588	4823.452	4574.938	3838.164	4101.532	3801.538	4030.776	Down Regulated
ENSG00000227502	ENSG00000227502.2	MROCKI	113868013	113873390	-1	lncRNA	MARCKS cis regulating lncRNA promoter of cytokines and inflammation [Source:HGNC Symbol;Acc:HGNC:50323]	1323.762	1.89455	0.2798337	4.13e-13	4.9e-11	886	790	2285	3213	2096	3112	789.7946	661.8204	2414.704	2886.795	2603.079	3496.036	Up Regulated
ENSG00000277443	ENSG00000277443.3	MARCKS	113857345	113863475	1	mRNA	myristoylated alanine rich protein kinase C substrate [Source:HGNC Symbol;Acc:HGNC:6759]	4928.985	0.7174439	0.2750408	0.0004803589	0.007793172	6668	6252	10085	10753	8577	8809	5943.962	5237.596	10657.46	9661.286	10652.01	9896.073	Up Regulated
ENSG00000232131	ENSG00000232131.1	NCOA7-AS1	125797856	125818858	-1	lncRNA	NCOA7 antisense RNA 1 [Source:HGNC Symbol;Acc:HGNC:40954]	24.72053	-2.046204	0.352805	4.55e-10	3.57e-08	47	63	7	16	11	6	41.89655	52.77808	7.397343	14.37558	13.6612	6.740429	Down Regulated
ENSG00000111912	ENSG00000111912.20	NCOA7	125781161	125932034	1	mRNA	nuclear receptor coactivator 7 [Source:HGNC Symbol;Acc:HGNC:21081]	4223.868	0.4879231	0.1676179	0.0003975783	0.006619353	3556	3623	3977	5246	3656	4393	3169.875	3035.159	4202.747	4713.392	4540.485	4935.117	Up Regulated
ENSG00000237499	ENSG00000237499.6	WAKMAR2	137823673	137868233	-1	lncRNA	wound and keratinocyte migration associated lncRNA 2 [Source:HGNC Symbol;Acc:HGNC:53754]	347.4621	3.041052	0.2534076	1.11e-34	1.41e-31	106	95	743	770	574	678	94.4901	79.586	785.1751	691.8246	712.8661	761.6684	Up Regulated
ENSG00000118503	ENSG00000118503.15	TNFAIP3	137867214	137883314	1	mRNA	TNF alpha induced protein 3 [Source:HGNC Symbol;Acc:HGNC:11896]	6604.385	3.549367	0.4241274	1.158451e-18	2.673915e-16	2035	2233	23604	23541	18916	20332	1814.032	1870.69	24943.84	21150.96	23492.29	22841.07	Up Regulated
ENSG00000278206	ENSG00000278206.1		143484979	143507327	1	lncRNA	novel transcript	52.07235	-1.060699	0.2487713	1.25e-06	4.5e-05	76	58	23	35	15	25	67.74762	48.58935	24.30555	31.44657	18.6289	28.08512	Down Regulated
ENSG00000229036	ENSG00000229036.7	VDAC1P8	143490424	143506406	1	mRNA	voltage dependent anion channel 1 pseudogene 8 [Source:HGNC Symbol;Acc:HGNC:37483]	277.4973	-0.9212636	0.1396692	3.355136e-12	3.605795e-10	381	420	197	195	119	160	339.6295	351.8539	208.1824	175.2023	147.7893	179.7448	Down Regulated
ENSG00000285730	ENSG00000285730.1		166995735	166999511	-1	lncRNA	novel transcript	120.2815	-0.5957597	0.2954932	0.004211849	0.04519339	46	57	29	19	19	31	41.00514	47.7516	30.64613	17.071	23.59661	34.82555	Down Regulated
ENSG00000213066	ENSG00000213066.13	CEP43	166999174	167052718	1	mRNA	centrosomal protein 43 [Source:HGNC Symbol;Acc:HGNC:17012]	477.2477	-0.3103461	0.1292274	0.004455801	0.04723707	496	564	318	417	260	343	442.1424	472.4895	336.0507	374.6634	322.901	385.3278	Down Regulated
ENSG00000285730	ENSG00000285730.1		166995735	166999511	-1	lncRNA	novel transcript	120.2815	-0.5957597	0.2954932	0.004211849	0.04519339	46	57	29	19	19	31	41.00514	47.7516	30.64613	17.071	23.59661	34.82555	Down Regulated
ENSG00000265828	ENSG00000265828.1	MIR3939	166997807	166997912	-1	mRNA	microRNA 3939 [Source:HGNC Symbol;Acc:HGNC:38931]	35.22434	-0.8207526	0.5279976	0.004601199	0.04852521	10	23	5	2	6	10	8.91416	19.26819	5.283816	1.796947	7.451562	11.23405	Down Regulated
ENSG00000272980	ENSG00000272980.4		166999336	167139138	1	lncRNA	novel protein	32.12514	-1.407884	0.3680769	7.31e-06	0.000207575	40	65	20	13	7	17	35.65664	54.45358	21.13526	11.68016	8.693489	19.09788	Down Regulated
ENSG00000213066	ENSG00000213066.13	CEP43	166999174	167052718	1	mRNA	centrosomal protein 43 [Source:HGNC Symbol;Acc:HGNC:17012]	477.2477	-0.3103461	0.1292274	0.004455801	0.04723707	496	564	318	417	260	343	442.1424	472.4895	336.0507	374.6634	322.901	385.3278	Down Regulated
ENSG00000272980	ENSG00000272980.4		166999336	167139138	1	lncRNA	novel protein	32.12514	-1.407884	0.3680769	7.31e-06	0.000207575	40	65	20	13	7	17	35.65664	54.45358	21.13526	11.68016	8.693489	19.09788	Down Regulated
ENSG00000265828	ENSG00000265828.1	MIR3939	166997807	166997912	-1	mRNA	microRNA 3939 [Source:HGNC Symbol;Acc:HGNC:38931]	35.22434	-0.8207526	0.5279976	0.004601199	0.04852521	10	23	5	2	6	10	8.91416	19.26819	5.283816	1.796947	7.451562	11.23405	Down Regulated
ENSG00000232821	ENSG00000232821.1		19112474	19114271	1	lncRNA	novel transcript	94.43158	0.9578149	0.2544639	8.43e-06	0.000235605	112	123	205	202	184	202	99.8386	103.0429	216.6365	181.4916	228.5146	226.9278	Up Regulated
ENSG00000122691	ENSG00000122691.13	TWIST1	19020991	19117636	-1	mRNA	twist family bHLH transcription factor 1 [Source:HGNC Symbol;Acc:HGNC:12428]	700.0746	1.099517	0.2393726	1.917361e-07	8.393412e-06	1099	1291	2437	2459	1872	2050	979.6662	1081.532	2575.332	2209.346	2324.887	2302.98	Up Regulated
ENSG00000236536	ENSG00000236536.1		19117773	19121920	1	lncRNA	novel transcript	17.21858	0.8256571	0.3564332	0.001116614	0.01562029	27	17	31	46	30	41	24.06823	14.2417	32.75966	41.32978	37.25781	46.0596	Up Regulated
ENSG00000122691	ENSG00000122691.13	TWIST1	19020991	19117636	-1	mRNA	twist family bHLH transcription factor 1 [Source:HGNC Symbol;Acc:HGNC:12428]	700.0746	1.099517	0.2393726	1.917361e-07	8.393412e-06	1099	1291	2437	2459	1872	2050	979.6662	1081.532	2575.332	2209.346	2324.887	2302.98	Up Regulated
ENSG00000228649	ENSG00000228649.8	SNHG26	22854126	22872952	1	lncRNA	small nucleolar RNA host gene 26 [Source:HGNC Symbol;Acc:HGNC:53131]	240.4002	0.3814902	0.1699099	0.004012515	0.04346784	305	353	350	443	299	388	271.8819	295.7248	369.8671	398.0238	371.3362	435.8811	Up Regulated
ENSG00000226329	ENSG00000226329.2		22863874	22881350	-1	mRNA	solute carrier family 40 (iron-regulated transporter), member 1 (SLC40A1) pseudogene	66.27771	0.5465665	0.2637992	0.003088081	0.03547799	55	52	65	80	78	60	49.02788	43.56286	68.68961	71.87788	96.8703	67.40429	Up Regulated
ENSG00000233429	ENSG00000233429.9	HOTAIRM1	27095647	27100265	1	lncRNA	HOXA transcript antisense RNA, myeloid-specific 1 [Source:HGNC Symbol;Acc:HGNC:37117]	38.25656	-1.085351	0.2522094	1.03e-06	3.79e-05	70	86	35	28	22	26	62.39912	72.04627	36.98671	25.15726	27.32239	29.20852	Down Regulated
ENSG00000105996	ENSG00000105996.7	HOXA2	27100354	27102686	-1	mRNA	homeobox A2 [Source:HGNC Symbol;Acc:HGNC:5103]	18.91564	-2.260042	0.3810253	2.114059e-10	1.76711e-08	35	62	2	11	12	5	31.19956	51.94033	2.113526	9.883208	14.90312	5.617024	Down Regulated
ENSG00000240449	ENSG00000240449.1	REPIN1-AS1	150363777	150372590	-1	lncRNA	REPIN1 antisense RNA 1 [Source:HGNC Symbol;Acc:HGNC:41201]	56.9331	1.232864	0.3070657	2.65e-06	8.6e-05	54	59	124	137	97	114	48.13647	49.42709	131.0386	123.0909	120.4669	128.0681	Up Regulated
ENSG00000214022	ENSG00000214022.11	REPIN1	150368189	150374044	1	mRNA	replication initiator 1 [Source:HGNC Symbol;Acc:HGNC:17922]	2152.246	1.071931	0.2217423	6.092581e-08	3.025733e-06	2132	2183	3747	4761	3326	3756	1900.499	1828.802	3959.692	4277.632	4130.649	4219.508	Up Regulated
ENSG00000245025	ENSG00000245025.2		22984596	23019335	-1	lncRNA	novel transcript, antisense to RHOBTB2	28.3756	-0.7908767	0.3442108	0.001175074	0.01627001	29	34	14	13	10	14	25.85107	28.48341	14.79469	11.68016	12.41927	15.72767	Down Regulated
ENSG00000120889	ENSG00000120889.13	TNFRSF10B	23020133	23069031	-1	mRNA	TNF receptor superfamily member 10b [Source:HGNC Symbol;Acc:HGNC:11905]	1014.392	0.5777832	0.206725	0.0004122684	0.006841501	1356	1457	1980	2028	1510	1793	1208.76	1220.598	2092.391	1822.104	1875.31	2014.265	Up Regulated
ENSG00000246130	ENSG00000246130.1		23068229	23083619	1	lncRNA	novel transcript	10.4171	2.97041	0.6356542	4.1e-07	1.67e-05	2	5	27	38	12	31	1.782832	4.188737	28.53261	34.14199	14.90312	34.82555	Up Regulated
ENSG00000120889	ENSG00000120889.13	TNFRSF10B	23020133	23069031	-1	mRNA	TNF receptor superfamily member 10b [Source:HGNC Symbol;Acc:HGNC:11905]	1014.392	0.5777832	0.206725	0.0004122684	0.006841501	1356	1457	1980	2028	1510	1793	1208.76	1220.598	2092.391	1822.104	1875.31	2014.265	Up Regulated
ENSG00000253535	ENSG00000253535.5	ADAM7-AS1	24295814	24912073	-1	lncRNA	ADAM7, ADAMDEC1 and ADAM28 antisense RNA 1 [Source:HGNC Symbol;Acc:HGNC:56152]	205.8725	2.491204	0.3563185	7.63e-14	1.03e-11	185	241	1095	1216	888	945	164.912	201.8971	1157.156	1092.544	1102.831	1061.618	Up Regulated
ENSG00000042980	ENSG00000042980.12	ADAM28	24294069	24359014	1	mRNA	ADAM metallopeptidase domain 28 [Source:HGNC Symbol;Acc:HGNC:206]	2409.612	0.385402	0.1538707	0.002019508	0.02532114	3377	3582	3947	4326	3434	3760	3010.312	3000.811	4171.044	3886.796	4264.777	4224.002	Up Regulated
ENSG00000250295	ENSG00000250295.6	RDH10-AS1	73297711	73356461	-1	lncRNA	RDH10 antisense RNA 1 [Source:HGNC Symbol;Acc:HGNC:51658]	324.7169	2.288743	0.2476227	7.84e-22	2.45e-19	214	265	887	1169	802	1071	190.763	222.003	937.349	1050.316	996.0254	1203.167	Up Regulated
ENSG00000121039	ENSG00000121039.10	RDH10	73294602	73325281	1	mRNA	retinol dehydrogenase 10 [Source:HGNC Symbol;Acc:HGNC:19975]	1294.956	0.8471343	0.1787179	1.246171e-07	5.612466e-06	1795	1898	2717	3262	2376	2896	1600.092	1590.044	2871.226	2930.821	2950.818	3253.38	Up Regulated
ENSG00000286113	ENSG00000286113.1		73879046	73882733	1	lncRNA	long intergenic non-protein coding RNA 1617	95.64982	2.336384	0.3026626	8.46e-16	1.51e-13	24	19	92	140	71	74	21.39399	15.9172	97.22222	125.7863	88.17681	83.13195	Up Regulated
ENSG00000104343	ENSG00000104343.20	UBE2W	73780097	73878910	-1	mRNA	ubiquitin conjugating enzyme E2 W [Source:HGNC Symbol;Acc:HGNC:25616]	3711.128	0.3580066	0.09037661	1.67961e-05	0.0004346018	3629	3735	4017	4503	3430	3644	3234.949	3128.986	4245.018	4045.826	4259.809	4093.687	Up Regulated
ENSG00000251867	ENSG00000251867.4		80484561	80486699	-1	lncRNA	novel transcript, antisense to ZBTB10	31.91495	1.850333	0.3899478	1.41e-07	6.27e-06	8	18	47	53	36	33	7.131328	15.07945	49.66787	47.6191	44.70937	37.07236	Up Regulated
ENSG00000205189	ENSG00000205189.12	ZBTB10	80485619	80526265	1	mRNA	zinc finger and BTB domain containing 10 [Source:HGNC Symbol;Acc:HGNC:30953]	1472.313	2.105058	0.328603	4.348983e-12	4.577023e-10	595	588	2182	2445	1949	2221	530.3925	492.5954	2305.857	2196.768	2420.516	2495.082	Up Regulated
ENSG00000272425	ENSG00000272425.1		81275399	81277570	-1	lncRNA	novel transcript	38.89663	-0.6891649	0.3505874	0.002896718	0.03364101	59	56	21	35	23	20	52.59355	46.91385	22.19203	31.44657	28.56432	22.4681	Down Regulated
ENSG00000164687	ENSG00000164687.11	FABP5	81280536	81284777	1	mRNA	fatty acid binding protein 5 [Source:HGNC Symbol;Acc:HGNC:3560]	182.0925	-2.055258	0.2678962	1.29912e-15	2.198977e-13	677	898	162	165	122	136	603.4887	752.2971	171.1956	148.2481	151.5151	152.783	Down Regulated
ENSG00000254027	ENSG00000254027.1	LNMICC	81279871	81281446	-1	lncRNA	lncRNA associated with lymph node metastasis in cervical cancer [Source:HGNC Symbol;Acc:HGNC:56001]	27.30785	-1.067849	0.3973132	0.000364727	0.006148002	47	48	14	22	17	10	41.89655	40.21187	14.79469	19.76642	21.11276	11.23405	Down Regulated
ENSG00000164687	ENSG00000164687.11	FABP5	81280536	81284777	1	mRNA	fatty acid binding protein 5 [Source:HGNC Symbol;Acc:HGNC:3560]	182.0925	-2.055258	0.2678962	1.29912e-15	2.198977e-13	677	898	162	165	122	136	603.4887	752.2971	171.1956	148.2481	151.5151	152.783	Down Regulated
ENSG00000260493	ENSG00000260493.1	E2F5-DT	85172077	85177062	-1	lncRNA	E2F5 divergent transcript [Source:HGNC Symbol;Acc:HGNC:55393]	17.18852	-1.928482	0.40875	1.47e-07	6.53e-06	42	39	9	9	7	6	37.43947	32.67215	9.510869	8.086261	8.693489	6.740429	Down Regulated
ENSG00000133740	ENSG00000133740.11	E2F5	85177154	85217158	1	mRNA	E2F transcription factor 5 [Source:HGNC Symbol;Acc:HGNC:3119]	158.8826	-0.7115651	0.1717131	3.039706e-06	9.677509e-05	331	324	153	192	116	162	295.0587	271.4301	161.6848	172.5069	144.0635	181.9916	Down Regulated
ENSG00000253549	ENSG00000253549.5	CA3-AS1	85440596	85464915	-1	lncRNA	CA3 antisense RNA 1 [Source:HGNC Symbol;Acc:HGNC:51657]	27.07974	1.582472	0.4924408	7.17e-05	0.001538703	6	12	28	28	24	24	5.348496	10.05297	29.58937	25.15726	29.80625	26.96171	Up Regulated
ENSG00000104267	ENSG00000104267.10	CA2	85463968	85481493	1	mRNA	carbonic anhydrase 2 [Source:HGNC Symbol;Acc:HGNC:1373]	2279.037	0.4599522	0.2158058	0.003397875	0.03830058	756	723	866	1118	769	864	673.9105	605.6913	915.1569	1004.493	955.0418	970.6217	Up Regulated
ENSG00000251136	ENSG00000251136.8	RIPK2-DT	89545424	89757812	-1	lncRNA	RIPK2 divergent transcript [Source:HGNC Symbol;Acc:HGNC:55545]	687.2952	0.759597	0.1770107	1.17e-06	4.22e-05	532	639	797	930	724	899	474.2333	535.3205	842.2403	835.5804	899.1551	1009.941	Up Regulated
ENSG00000104312	ENSG00000104312.8	RIPK2	89757806	89791064	1	mRNA	receptor interacting serine/threonine kinase 2 [Source:HGNC Symbol;Acc:HGNC:10020]	816.9748	1.082595	0.2392007	2.671692e-07	1.130571e-05	931	947	1831	1968	1467	1607	829.9083	793.3467	1934.933	1768.196	1821.907	1805.311	Up Regulated
ENSG00000253854	ENSG00000253854.1		93719574	93721167	1	lncRNA	novel transcript	104.2848	-0.4142241	0.1750189	0.002412624	0.02908322	120	170	78	84	68	98	106.9699	142.417	82.42753	75.47177	84.45103	110.0937	Down Regulated
ENSG00000188343	ENSG00000188343.12	CIBAR1	93698561	93731527	1	mRNA	CBY1 interacting BAR domain containing 1 [Source:HGNC Symbol;Acc:HGNC:30452]	615.7402	-0.4251126	0.118868	6.210772e-05	0.001362346	730	785	467	528	374	410	650.7337	657.6317	493.5084	474.394	464.4807	460.596	Down Regulated
ENSG00000279331	ENSG00000279331.1	RBM12B-AS1	93740121	93740773	1	lncRNA	RBM12B antisense RNA 1 [Source:HGNC Symbol;Acc:HGNC:28818]	95.269	-0.5409902	0.2018674	0.000721527	0.01088022	124	130	67	78	40	79	110.5356	108.9072	70.80314	70.08093	49.67708	88.74898	Down Regulated
ENSG00000183808	ENSG00000183808.11	RBM12B	93728155	93741017	-1	mRNA	RNA binding motif protein 12B [Source:HGNC Symbol;Acc:HGNC:32310]	1565.606	-0.23971	0.06928105	0.0001467103	0.002838076	1906	1893	1336	1559	1097	1153	1699.039	1585.856	1411.836	1400.72	1362.394	1295.286	Down Regulated
ENSG00000280077	ENSG00000280077.1		41012231	41014133	1	lncRNA	TEC	198.6049	-0.7355843	0.1524659	1.25e-07	5.63e-06	356	373	187	199	129	172	317.3441	312.4798	197.6147	178.7962	160.2086	193.2256	Down Regulated
ENSG00000277778	ENSG00000277778.2	PGM5P2	41039611	41074448	-1	mRNA	phosphoglucomutase 5 pseudogene 2 [Source:HGNC Symbol;Acc:HGNC:18965]	143.3796	-0.6759367	0.1636167	3.310013e-06	0.0001046889	206	264	106	130	89	131	183.6317	221.1653	112.0169	116.8016	110.5315	147.166	Down Regulated
ENSG00000273066	ENSG00000273066.5		136799223	136810042	1	lncRNA	novel transcript	36.38005	-1.02727	0.2840016	1.91e-05	0.000484764	51	61	19	28	14	21	45.46222	51.10259	20.0785	25.15726	17.38698	23.5915	Down Regulated
ENSG00000213212	ENSG00000213212.3	NCLP1	136812788	136815536	-1	mRNA	nucleolin pseudogene 1 [Source:HGNC Symbol;Acc:HGNC:35472]	69.40754	-0.7959675	0.228449	3.457603e-05	0.0008166377	84	86	42	43	31	32	74.87895	72.04627	44.38406	38.63436	38.49974	35.94895	Down Regulated
ENSG00000270069	ENSG00000270069.1	MIR222HG	45745210	45770274	-1	lncRNA	miR222/221 cluster host gene [Source:HGNC Symbol;Acc:HGNC:49555]	1547.158	1.407259	0.1417155	1.34e-24	5.8e-22	1050	1020	2273	2601	1979	2219	935.9868	854.5023	2402.023	2336.93	2457.773	2492.835	Up Regulated
ENSG00000207725	ENSG00000207725.3	MIR222	45747015	45747124	-1	mRNA	microRNA 222 [Source:HGNC Symbol;Acc:HGNC:31602]	23.6958	1.151305	0.3884978	0.0001795334	0.003363287	15	17	39	32	26	35	13.37124	14.2417	41.21377	28.75115	32.2901	39.31917	Up Regulated
ENSG00000270069	ENSG00000270069.1	MIR222HG	45745210	45770274	-1	lncRNA	miR222/221 cluster host gene [Source:HGNC Symbol;Acc:HGNC:49555]	1547.158	1.407259	0.1417155	1.34e-24	5.8e-22	1050	1020	2273	2601	1979	2219	935.9868	854.5023	2402.023	2336.93	2457.773	2492.835	Up Regulated
ENSG00000207870	ENSG00000207870.1	MIR221	45746157	45746266	-1	mRNA	microRNA 221 [Source:HGNC Symbol;Acc:HGNC:31601]	42.10937	0.7865536	0.2719518	0.0002449793	0.004376447	46	31	63	68	44	64	41.00514	25.97017	66.57608	61.0962	54.64479	71.89791	Up Regulated
ENSG00000232160	ENSG00000232160.6	RAP2C-AS1	132217053	132432862	1	lncRNA	RAP2C antisense RNA 1 [Source:HGNC Symbol;Acc:HGNC:40957]	93.72118	0.9521932	0.1666416	8e-10	6.04e-08	76	103	134	169	125	153	67.74762	86.28797	141.6063	151.842	155.2409	171.8809	Up Regulated
ENSG00000123728	ENSG00000123728.10	RAP2C	132203024	132219480	-1	mRNA	RAP2C, member of RAS oncogene family [Source:HGNC Symbol;Acc:HGNC:21165]	1584.37	0.881739	0.2247125	4.48852e-06	0.0001358731	1495	1489	2388	2662	2209	2225	1332.667	1247.406	2523.551	2391.736	2743.417	2499.576	Up Regulated

## Sheet: Dh5a
ENSEMBL ID	ENSEMBL ID with Version	Gene name	Gene start(bp)	Gene end(bp)	Strand	Type	Description	baseMean	log2FoldChange	lfcSE	pvalue	padj	Raw Mock1	Raw Mock2	Raw Mock3	Raw Mock4	Raw DH5α_A	Raw DH5α_B	Raw DH5α_C	Raw DH5α_D	Norm Mock1	Norm Mock2	Norm Mock3	Norm Mock4	Norm DH5α_A	Norm DH5α_B	Norm DH5α_C	Norm DH5α_D	Up/Down Regulation
ENSG00000285646	ENSG00000285646.1		11907940	11914298	1	lncRNA	novel transcript	145.4834	2.734064	0.2182185	5.22e-37	5.58e-34	29	39	21	14	150	152	148	154	26.2332	30.16287	19.90164	14.0626	149.6397	155.7498	155.0515	165.152	Up Regulated
ENSG00000201801	ENSG00000201801.1	RNU5E-4P	11909808	11909927	-1	mRNA	RNA, U5E small nuclear 4, pseudogene [Source:HGNC Symbol;Acc:HGNC:42513]	55.80414	1.061945	0.265501	4.098006e-06	7.01844e-05	17	31	21	22	52	36	49	41	15.37808	23.97562	19.90164	22.09837	51.87511	36.88811	51.33462	43.96903	Up Regulated
ENSG00000228140	ENSG00000228140.1	EFHD2-AS1	15402979	15409433	-1	lncRNA	EFHD2 antisense RNA 1 [Source:HGNC Symbol;Acc:HGNC:55801]	45.12631	1.805692	0.2432874	7.95e-15	1.26e-12	20	20	18	17	57	59	64	58	18.09186	15.46814	17.05855	17.07601	56.8631	60.45551	67.0493	62.20009	Up Regulated
ENSG00000142621	ENSG00000142621.19	FHAD1	15236521	15400283	1	mRNA	forkhead associated phosphopeptide binding domain 1 [Source:HGNC Symbol;Acc:HGNC:29408]	60.76958	0.3742977	0.2060108	0.01316089	0.04894719	48	46	45	26	44	52	45	61	43.42046	35.57672	42.64636	26.11625	43.89432	53.28283	47.14404	65.41734	Up Regulated
ENSG00000230068	ENSG00000230068.2	CDC42-IT1	22059197	22064199	1	lncRNA	CDC42 intronic transcript 1 [Source:HGNC Symbol;Acc:HGNC:41317]	72.74885	0.6410681	0.157607	5.77e-06	9.4e-05	90	113	115	88	149	139	120	164	81.41337	87.39499	108.9852	88.39348	148.6421	142.4291	125.7174	175.8761	Up Regulated
ENSG00000271428	ENSG00000271428.1	MPHOSPH6P1	22068340	22068827	-1	mRNA	MPHOSPH6 pseudogene 1 [Source:HGNC Symbol;Acc:HGNC:54549]	56.88357	0.4860729	0.216311	0.003134895	0.01584374	47	74	84	71	66	85	90	125	42.51587	57.23212	79.60655	71.31746	65.84148	87.09693	94.28808	134.0519	Up Regulated
ENSG00000284602	ENSG00000284602.1		25232586	25234775	1	lncRNA	novel transcript	55.16545	-0.3554542	0.1698431	0.0070381	0.03013446	66	103	86	76	57	44	60	49	59.70314	79.66092	81.50194	76.33982	56.8631	45.08547	62.85872	52.54835	Down Regulated
ENSG00000117614	ENSG00000117614.10	SYF2	25222276	25232502	-1	mRNA	SYF2 pre-mRNA splicing factor [Source:HGNC Symbol;Acc:HGNC:19824]	1009.161	-0.2372829	0.08529674	0.002683249	0.01401084	876	951	753	690	590	647	635	500	792.4234	735.51	713.6158	693.0852	588.5829	662.9613	665.2548	536.2077	Down Regulated
ENSG00000284657	ENSG00000284657.1		25239494	25240253	1	lncRNA	novel transcript	14.53854	0.5852755	0.3783224	0.0082922	0.0341826	11	19	15	15	28	18	25	24	9.950523	14.69473	14.21545	15.06707	27.93275	18.44406	26.19113	25.73797	Up Regulated
ENSG00000117616	ENSG00000117616.18	RSRP1	25242249	25338213	-1	mRNA	arginine and serine rich protein 1 [Source:HGNC Symbol;Acc:HGNC:25234]	1634.196	-0.2836496	0.08872751	0.0005478755	0.003946258	1655	2271	1342	1562	1145	1252	1172	1188	1497.101	1756.407	1271.809	1568.984	1142.25	1282.886	1227.84	1274.029	Down Regulated
ENSG00000269971	ENSG00000269971.1		27773858	27774041	1	lncRNA	novel transcript, sense intronic to STX12	33.00312	1.123002	0.2466635	3.44e-07	9.07e-06	26	22	30	15	47	43	42	56	23.51942	17.01495	28.43091	15.06707	46.88712	44.0608	44.00111	60.05526	Up Regulated
ENSG00000117758	ENSG00000117758.14	STX12	27773219	27824443	1	mRNA	syntaxin 12 [Source:HGNC Symbol;Acc:HGNC:11430]	2275.031	0.1844726	0.07183694	0.006625203	0.02876681	1284	1642	1455	1074	1364	1339	1394	1328	1161.497	1269.934	1378.899	1078.802	1360.724	1372.033	1460.418	1424.168	Up Regulated
ENSG00000236065	ENSG00000236065.2		32987075	33032469	1	lncRNA	novel transcript	25.40663	-0.6093834	0.2976373	0.00303917	0.01547158	39	78	44	92	41	24	26	36	35.27913	60.32574	41.69867	92.41136	40.90153	24.59207	27.23878	38.60695	Down Regulated
ENSG00000004455	ENSG00000004455.16	AK2	33007986	33080996	-1	mRNA	adenylate kinase 2 [Source:HGNC Symbol;Acc:HGNC:362]	3605.338	-0.3492952	0.06509152	2.444335e-08	1.017404e-06	5234	7431	4483	5570	3819	4018	3883	3567	4734.64	5747.187	4248.526	5594.905	3809.828	4117.123	4068.007	3825.306	Down Regulated
ENSG00000228060	ENSG00000228060.2	PABPC4-AS1	39565052	39573860	1	lncRNA	PABPC4 antisense RNA 1 [Source:HGNC Symbol;Acc:HGNC:40424]	771.3002	1.109614	0.1627066	5.98e-13	7.23e-11	285	391	400	435	653	687	723	880	257.809	302.4021	379.0788	436.945	651.4316	703.9481	757.4476	943.7255	Up Regulated
ENSG00000201457	ENSG00000201457.1	SNORA55	39567374	39567508	-1	mRNA	small nucleolar RNA, H/ACA box 55 [Source:HGNC Symbol;Acc:HGNC:32649]	316.1437	0.4760055	0.1673208	0.0006700805	0.004610662	170	297	198	224	251	252	273	349	153.7808	229.7019	187.644	225.0016	250.3972	258.2168	286.0072	374.273	Up Regulated
ENSG00000228060	ENSG00000228060.2	PABPC4-AS1	39565052	39573860	1	lncRNA	PABPC4 antisense RNA 1 [Source:HGNC Symbol;Acc:HGNC:40424]	771.3002	1.109614	0.1627066	5.98e-13	7.23e-11	285	391	400	435	653	687	723	880	257.809	302.4021	379.0788	436.945	651.4316	703.9481	757.4476	943.7255	Up Regulated
ENSG00000090621	ENSG00000090621.14	PABPC4	39560709	39576790	-1	mRNA	poly(A) binding protein cytoplasmic 4 [Source:HGNC Symbol;Acc:HGNC:8557]	18537.85	0.3521414	0.07158955	2.60798e-07	7.177952e-06	11845	17306	13361	13887	16156	15142	15560	16356	10714.9	13384.58	12662.18	13949.09	16117.2	15515.55	16301.36	17540.43	Up Regulated
ENSG00000236546	ENSG00000236546.1	MYCL-AS1	39897745	39899098	1	lncRNA	MYCL antisense RNA 1 [Source:HGNC Symbol;Acc:HGNC:40386]	80.50283	0.4785154	0.1824503	0.001259367	0.007646244	116	103	124	68	154	135	113	129	104.9328	79.66092	117.5144	68.30405	153.6301	138.3304	118.3839	138.3416	Up Regulated
ENSG00000116990	ENSG00000116990.11	MYCL	39895426	39902256	-1	mRNA	MYCL proto-oncogene, bHLH transcription factor [Source:HGNC Symbol;Acc:HGNC:7555]	880.594	0.4026453	0.07468694	1.66915e-08	7.386445e-07	831	927	808	929	1088	985	924	1090	751.7168	716.9483	765.7392	933.1538	1085.387	1009.3	968.0243	1168.933	Up Regulated
ENSG00000259943	ENSG00000259943.1	ZMPSTE24-DT	40256333	40257971	-1	lncRNA	ZMPSTE24 divergent transcript [Source:HGNC Symbol;Acc:HGNC:55402]	1944.936	-0.3750863	0.07400347	1.08e-07	3.5e-06	1832	1846	1643	1159	1059	1118	1131	972	1657.214	1427.709	1557.066	1164.182	1056.457	1145.581	1184.887	1042.388	Down Regulated
ENSG00000231296	ENSG00000231296.1		40262672	40262984	-1	mRNA	pseudogene similar to part of RIO kinase 2 (yeast) (RIOK2)	77.82911	-0.5262207	0.1877283	0.0006368558	0.004422501	83	101	82	101	54	51	59	45	75.08122	78.1141	77.71115	101.4516	53.8703	52.25816	61.81108	48.25869	Down Regulated
ENSG00000259943	ENSG00000259943.1	ZMPSTE24-DT	40256333	40257971	-1	lncRNA	ZMPSTE24 divergent transcript [Source:HGNC Symbol;Acc:HGNC:55402]	1944.936	-0.3750863	0.07400347	1.08e-07	3.5e-06	1832	1846	1643	1159	1059	1118	1131	972	1657.214	1427.709	1557.066	1164.182	1056.457	1145.581	1184.887	1042.388	Down Regulated
ENSG00000084073	ENSG00000084073.9	ZMPSTE24	40258041	40294180	1	mRNA	zinc metallopeptidase STE24 [Source:HGNC Symbol;Acc:HGNC:12877]	22077.08	-0.2742284	0.07446633	9.7858e-05	0.0009830325	21205	25693	20498	19578	15221	15528	15907	15030	19181.89	19871.15	19425.89	19665.54	15184.44	15911.07	16664.89	16118.4	Down Regulated
ENSG00000259943	ENSG00000259943.1	ZMPSTE24-DT	40256333	40257971	-1	lncRNA	ZMPSTE24 divergent transcript [Source:HGNC Symbol;Acc:HGNC:55402]	1944.936	-0.3750863	0.07400347	1.08e-07	3.5e-06	1832	1846	1643	1159	1059	1118	1131	972	1657.214	1427.709	1557.066	1164.182	1056.457	1145.581	1184.887	1042.388	Down Regulated
ENSG00000188800	ENSG00000188800.6	TMCO2	40245947	40251684	1	mRNA	transmembrane and coiled-coil domains 2 [Source:HGNC Symbol;Acc:HGNC:23312]	45.06047	-0.4853112	0.2342425	0.00475287	0.02208655	45	64	46	51	36	23	26	31	40.70668	49.49805	43.59406	51.22804	35.91354	23.5674	27.23878	33.24488	Down Regulated
ENSG00000279667	ENSG00000279667.1		40473055	40474059	1	lncRNA	TEC	169.1518	-0.3787442	0.1584663	0.003966812	0.01918883	179	251	147	320	127	142	159	148	161.9221	194.1252	139.3115	321.4308	126.695	145.5031	166.5756	158.7175	Down Regulated
ENSG00000187815	ENSG00000187815.10	ZFP69	40477290	40496343	1	mRNA	ZFP69 zinc finger protein [Source:HGNC Symbol;Acc:HGNC:24708]	3391.202	-0.2913649	0.06333101	1.682341e-06	3.39344e-05	3894	4854	3370	3195	2611	2684	2737	2676	3522.485	3754.117	3193.739	3209.286	2604.729	2750.214	2867.405	2869.784	Down Regulated
ENSG00000238287	ENSG00000238287.1	EXO5-DT	40493157	40508661	-1	lncRNA	EXO5 divergent transcript [Source:HGNC Symbol;Acc:HGNC:55647]	274.3133	-0.3064577	0.1160682	0.002738649	0.01425614	338	469	354	422	272	247	275	288	305.7524	362.7279	335.4847	423.8869	271.3467	253.0934	288.1025	308.8556	Down Regulated
ENSG00000164002	ENSG00000164002.11	EXO5	40508741	40516038	1	mRNA	exonuclease 5 [Source:HGNC Symbol;Acc:HGNC:26115]	2292.85	-0.2145137	0.05858077	0.0001450045	0.001350569	2751	3900	2681	2353	2198	2193	2148	2080	2488.535	3016.287	2540.776	2363.521	2192.721	2247.101	2250.342	2230.624	Down Regulated
ENSG00000238287	ENSG00000238287.1	EXO5-DT	40493157	40508661	-1	lncRNA	EXO5 divergent transcript [Source:HGNC Symbol;Acc:HGNC:55647]	274.3133	-0.3064577	0.1160682	0.002738649	0.01425614	338	469	354	422	272	247	275	288	305.7524	362.7279	335.4847	423.8869	271.3467	253.0934	288.1025	308.8556	Down Regulated
ENSG00000187815	ENSG00000187815.10	ZFP69	40477290	40496343	1	mRNA	ZFP69 zinc finger protein [Source:HGNC Symbol;Acc:HGNC:24708]	3391.202	-0.2913649	0.06333101	1.682341e-06	3.39344e-05	3894	4854	3370	3195	2611	2684	2737	2676	3522.485	3754.117	3193.739	3209.286	2604.729	2750.214	2867.405	2869.784	Down Regulated
ENSG00000285728	ENSG00000285728.1		42658687	42682207	-1	lncRNA	novel transcript, antisense to PPIH	129.9286	-0.3440841	0.1265521	0.001781058	0.0100631	161	236	198	212	139	119	127	150	145.6395	182.524	187.644	212.9479	138.6662	121.9357	133.051	160.8623	Down Regulated
ENSG00000171960	ENSG00000171960.11	PPIH	42658335	42676758	1	mRNA	peptidylprolyl isomerase H [Source:HGNC Symbol;Acc:HGNC:14651]	899.3376	-0.3372021	0.07269618	1.113833e-06	2.414534e-05	1090	1505	1112	1142	818	856	829	789	986.0063	1163.978	1053.839	1147.106	816.0353	877.1173	868.498	846.1357	Down Regulated
ENSG00000229431	ENSG00000229431.1	MED8-AS1	43385113	43389155	1	lncRNA	MED8 antisense RNA 1 [Source:HGNC Symbol;Acc:HGNC:40908]	56.33991	-0.4935788	0.223635	0.00339081	0.0168892	40	91	75	67	39	39	42	34	36.18372	70.38004	71.07727	67.29958	38.90633	39.96212	44.00111	36.46212	Down Regulated
ENSG00000198198	ENSG00000198198.16	SZT2	43389882	43454247	1	mRNA	SZT2 subunit of KICSTOR complex [Source:HGNC Symbol;Acc:HGNC:29040]	8885.641	0.3724174	0.1186323	0.0004206309	0.003206972	9694	11618	10185	9304	12364	11352	10939	12676	8769.124	8985.442	9652.294	9345.601	12334.3	11632.05	11460.19	13593.94	Up Regulated
ENSG00000236434	ENSG00000236434.2		51264916	51266074	-1	lncRNA	novel transcript	20.1213	0.4411285	0.2726356	0.01301007	0.04858624	22	27	19	26	44	24	27	32	19.90105	20.88199	18.00624	26.11625	43.89432	24.59207	28.28642	34.31729	Up Regulated
ENSG00000123091	ENSG00000123091.5	RNF11	51236273	51273447	1	mRNA	ring finger protein 11 [Source:HGNC Symbol;Acc:HGNC:10056]	3954.748	-0.2989665	0.08037995	7.452378e-05	0.0007868925	3701	3651	2956	2450	2197	2316	2262	2085	3347.899	2823.709	2801.392	2460.955	2191.723	2373.135	2369.774	2235.986	Down Regulated
ENSG00000228369	ENSG00000228369.2	TXNDC12-AS1	52050918	52052683	1	lncRNA	TXNDC12 antisense RNA 1 [Source:HGNC Symbol;Acc:HGNC:30008]	16.96858	-0.6924107	0.2946314	0.001402117	0.008303149	46	32	30	38	16	18	17	19	41.61128	24.74902	28.43091	38.16991	15.96157	18.44406	17.80997	20.37589	Down Regulated
ENSG00000134717	ENSG00000134717.18	BTF3L4	52056199	52090716	1	mRNA	basic transcription factor 3 like 4 [Source:HGNC Symbol;Acc:HGNC:30547]	1892.287	-0.2196878	0.07254396	0.001357576	0.008105552	2026	2440	1676	1594	1478	1347	1462	1389	1832.705	1887.113	1588.34	1601.127	1474.45	1380.23	1531.658	1489.585	Down Regulated
ENSG00000280378	ENSG00000280378.1		54033126	54034880	-1	lncRNA	TEC	30.43076	-0.5589227	0.2289353	0.00137685	0.008198936	65	58	49	47	35	28	31	24	58.79854	44.8576	46.43715	47.21015	34.91594	28.69075	32.47701	25.73797	Down Regulated
ENSG00000116209	ENSG00000116209.11	TMEM59	54026681	54053504	-1	mRNA	transmembrane protein 59 [Source:HGNC Symbol;Acc:HGNC:1239]	6379.775	-0.2531636	0.07583825	0.0003950917	0.003056018	7139	7651	5348	3744	4241	4555	4290	3912	6457.889	5917.337	5068.283	3760.741	4230.814	4667.371	4494.399	4195.289	Down Regulated
ENSG00000234807	ENSG00000234807.6	LINC01135	58784384	58901109	1	lncRNA	long intergenic non-protein coding RNA 1135 [Source:HGNC Symbol;Acc:HGNC:49450]	19.03975	1.262096	0.3795775	5.07e-05	0.000573444	20	10	5	3	25	27	22	16	18.09186	7.73407	4.738485	3.013414	24.93996	27.66608	23.0482	17.15865	Up Regulated
ENSG00000177606	ENSG00000177606.6	JUN	58776845	58784048	-1	mRNA	Jun proto-oncogene, AP-1 transcription factor subunit [Source:HGNC Symbol;Acc:HGNC:6204]	9918.418	2.571339	0.1583401	1.447415e-60	8.835333e-57	3130	3289	3192	2075	16274	15865	14505	14438	2831.376	2543.736	3025.049	2084.278	16234.91	16256.39	15196.1	15483.53	Up Regulated
ENSG00000273338	ENSG00000273338.1		78004346	78004554	-1	lncRNA	novel transcript, antisense to DNAJB4	68.67149	2.189193	0.265104	1.04e-17	2.4e-15	19	20	10	18	64	68	88	57	17.18727	15.46814	9.47697	18.08048	63.84629	69.67754	92.19279	61.12768	Up Regulated
ENSG00000162616	ENSG00000162616.9	DNAJB4	77979175	78017964	1	mRNA	DnaJ heat shock protein family (Hsp40) member B4 [Source:HGNC Symbol;Acc:HGNC:14886]	312.8024	0.7138634	0.1287136	2.921994e-09	1.644087e-07	319	368	235	233	398	397	443	438	288.5652	284.6138	222.7088	234.0418	397.0441	406.7939	464.1069	469.7179	Up Regulated
ENSG00000280099	ENSG00000280099.1		85152487	85154203	-1	lncRNA	TEC	23.07039	-1.141452	0.2859371	4.16e-06	7.11e-05	46	67	17	56	21	13	18	15	41.61128	51.81827	16.11085	56.25039	20.94956	13.32071	18.85762	16.08623	Down Regulated
ENSG00000097096	ENSG00000097096.9	SYDE2	85156889	85201724	-1	mRNA	synapse defective Rho GTPase homolog 2 [Source:HGNC Symbol;Acc:HGNC:25841]	232.6358	-1.127947	0.1497943	3.505335e-15	5.983223e-13	389	470	158	293	128	110	131	132	351.8867	363.5013	149.7361	294.3101	127.6926	112.7137	137.2415	141.5588	Down Regulated
ENSG00000272931	ENSG00000272931.1	LRRC8D-DT	89820174	89820868	-1	lncRNA	LRRC8D divergent transcript [Source:HGNC Symbol;Acc:HGNC:55186]	41.40546	-0.5973886	0.225589	0.000846054	0.005552517	57	72	48	80	34	35	38	30	51.5618	55.6853	45.48945	80.3577	33.91834	35.86344	39.81052	32.17246	Down Regulated
ENSG00000171492	ENSG00000171492.14	LRRC8D	89821014	89936611	1	mRNA	leucine rich repeat containing 8 VRAC subunit D [Source:HGNC Symbol;Acc:HGNC:16992]	1836.628	-0.20795	0.05769861	0.0001706434	0.001535715	1772	2308	1714	1934	1422	1486	1421	1444	1602.939	1785.023	1624.353	1942.648	1418.585	1522.659	1488.704	1548.568	Down Regulated
ENSG00000273487	ENSG00000273487.1		92189237	92190707	1	lncRNA	novel transcript	13.48103	-0.753966	0.3685841	0.002528286	0.01335619	27	25	18	28	17	11	6	9	24.42401	19.33517	17.05855	28.1252	16.95917	11.27137	6.285872	9.651739	Down Regulated
ENSG00000189195	ENSG00000189195.13	BTBD8	92080305	92184725	1	mRNA	BTB domain containing 8 [Source:HGNC Symbol;Acc:HGNC:21019]	553.7267	-0.4537597	0.1131428	1.110251e-05	0.0001627994	748	712	531	608	381	408	410	410	676.6355	550.6658	503.2271	610.7186	380.0849	418.0652	429.5346	439.6903	Down Regulated
ENSG00000228852	ENSG00000228852.6		95243167	95278940	-1	lncRNA	novel transcript, antisense to RWDD3	50.81474	-0.7533893	0.2193546	4.36e-05	0.000506891	51	82	57	69	24	36	30	34	46.13424	63.41937	54.01873	69.30852	23.94236	36.88811	31.42936	36.46212	Down Regulated
ENSG00000122481	ENSG00000122481.17	RWDD3	95234210	95247225	1	mRNA	RWD domain containing 3 [Source:HGNC Symbol;Acc:HGNC:21393]	138.596	-0.5254631	0.1252341	3.988887e-06	6.86048e-05	133	160	160	141	71	103	69	106	120.3109	123.7451	151.6315	141.6305	70.82947	105.541	72.28753	113.676	Down Regulated
ENSG00000224699	ENSG00000224699.8	LAMTOR5-AS1	110347116	110443817	1	lncRNA	LAMTOR5 antisense RNA 1 [Source:HGNC Symbol;Acc:HGNC:40823]	333.3179	-0.2773658	0.07515983	9.35e-05	0.000952219	610	683	591	517	429	446	389	437	551.8017	528.237	560.0889	519.3117	427.9696	457.0027	407.534	468.6455	Down Regulated
ENSG00000134248	ENSG00000134248.13	LAMTOR5	110401249	110407942	-1	mRNA	late endosomal/lysosomal adaptor, MAPK and MTOR activator 5 [Source:HGNC Symbol;Acc:HGNC:17955]	932.7295	-0.2849502	0.09406644	0.0009485871	0.006083589	764	898	765	759	554	575	588	518	691.109	694.5195	724.9882	762.3937	552.6694	589.1851	616.0155	555.5112	Down Regulated
ENSG00000224699	ENSG00000224699.8	LAMTOR5-AS1	110347116	110443817	1	lncRNA	LAMTOR5 antisense RNA 1 [Source:HGNC Symbol;Acc:HGNC:40823]	333.3179	-0.2773658	0.07515983	9.35e-05	0.000952219	610	683	591	517	429	446	389	437	551.8017	528.237	560.0889	519.3117	427.9696	457.0027	407.534	468.6455	Down Regulated
ENSG00000162775	ENSG00000162775.15	RBM15	110338506	110346681	1	mRNA	RNA binding motif protein 15 [Source:HGNC Symbol;Acc:HGNC:14959]	2311.234	-0.158389	0.05433421	0.002606666	0.01369545	3642	4231	3278	2853	2700	2808	2737	2563	3294.528	3272.285	3106.551	2865.757	2693.515	2877.273	2867.405	2748.601	Down Regulated
ENSG00000273010	ENSG00000273010.1		110963302	110964649	1	lncRNA	novel transcript, antisense to LRIF1	33.70759	0.425652	0.2314685	0.01143547	0.04389664	25	43	33	17	32	37	41	40	22.61482	33.2565	31.274	17.07601	31.92314	37.91278	42.95346	42.89662	Up Regulated
ENSG00000121931	ENSG00000121931.16	LRIF1	110947190	110963965	-1	mRNA	ligand dependent nuclear receptor interacting factor 1 [Source:HGNC Symbol;Acc:HGNC:30299]	1127.588	-0.428552	0.09557249	1.528302e-06	3.147411e-05	927	1293	748	1012	639	565	697	611	838.5577	1000.015	708.8773	1016.525	637.4653	578.9384	730.2088	655.2458	Down Regulated
ENSG00000243960	ENSG00000243960.1		111438638	111441364	-1	lncRNA	novel transcript	21.25168	-1.214588	0.3573199	4.15e-05	0.000485875	27	18	15	41	11	5	9	9	24.42401	13.92133	14.21545	41.18332	10.97358	5.123349	9.428808	9.651739	Down Regulated
ENSG00000233337	ENSG00000233337.1	UBE2FP3	111437514	111438037	1	mRNA	UBE2F pseudogene 3 [Source:HGNC Symbol;Acc:HGNC:44537]	33.4143	-0.5323677	0.2615664	0.004383497	0.02076921	28	36	30	45	23	17	13	22	25.3286	27.84265	28.43091	45.20121	22.94476	17.41939	13.61939	23.59314	Down Regulated
ENSG00000235527	ENSG00000235527.6	HIPK1-AS1	113924000	113929495	-1	lncRNA	HIPK1 antisense RNA 1 [Source:HGNC Symbol;Acc:HGNC:50576]	227.374	1.133896	0.2131903	6.57e-09	3.32e-07	137	140	140	91	258	276	253	230	123.9292	108.277	132.6776	91.40689	257.3803	282.8088	265.0543	246.6555	Up Regulated
ENSG00000163349	ENSG00000163349.22	HIPK1	113929324	113977869	1	mRNA	homeodomain interacting protein kinase 1 [Source:HGNC Symbol;Acc:HGNC:19006]	8107.61	0.3005524	0.09605326	0.0006329785	0.004403103	9647	11519	10056	11237	11662	11582	11699	11726	8726.608	8908.875	9530.041	11287.24	11633.99	11867.72	12256.4	12575.14	Up Regulated
ENSG00000237781	ENSG00000237781.3	ADAMTSL4-AS2	150548562	150557724	-1	lncRNA	ADAMTSL4 antisense RNA 2 [Source:HGNC Symbol;Acc:HGNC:40895]	53.15017	1.134269	0.2406626	1.59e-07	4.83e-06	15	26	27	24	45	45	48	49	13.56889	20.10858	25.58782	24.10731	44.89192	46.11014	50.28698	52.54835	Up Regulated
ENSG00000143382	ENSG00000143382.14	ADAMTSL4	150549369	150560937	1	mRNA	ADAMTS like 4 [Source:HGNC Symbol;Acc:HGNC:19706]	728.1196	0.5614193	0.2246423	0.001296595	0.007810334	434	731	546	504	791	723	675	880	392.5933	565.3605	517.4426	506.2535	789.1002	740.8362	707.1606	943.7255	Up Regulated
ENSG00000203804	ENSG00000203804.4	ADAMTSL4-AS1	150560202	150562115	-1	lncRNA	ADAMTSL4 antisense RNA 1 [Source:HGNC Symbol;Acc:HGNC:32041]	484.4153	1.068549	0.1490146	5.07e-14	7.47e-12	231	415	356	437	668	583	615	840	208.961	320.9639	337.3801	438.954	666.3956	597.3825	644.3019	900.8289	Up Regulated
ENSG00000143384	ENSG00000143384.13	MCL1	150560895	150579738	-1	mRNA	MCL1 apoptosis regulator, BCL2 family member [Source:HGNC Symbol;Acc:HGNC:6943]	32100.14	0.566366	0.08301471	1.262836e-12	1.457428e-10	15758	22446	19325	18476	23935	25309	24956	24977	14254.58	17359.89	18314.24	18558.61	23877.51	25933.37	26145.04	26785.72	Up Regulated
ENSG00000203804	ENSG00000203804.4	ADAMTSL4-AS1	150560202	150562115	-1	lncRNA	ADAMTSL4 antisense RNA 1 [Source:HGNC Symbol;Acc:HGNC:32041]	484.4153	1.068549	0.1490146	5.07e-14	7.47e-12	231	415	356	437	668	583	615	840	208.961	320.9639	337.3801	438.954	666.3956	597.3825	644.3019	900.8289	Up Regulated
ENSG00000274963	ENSG00000274963.1	RN7SL600P	150568971	150569269	-1	mRNA	RNA, 7SL, cytoplasmic 600, pseudogene [Source:HGNC Symbol;Acc:HGNC:46616]	145.6335	1.508828	0.2011911	3.584133e-15	6.066742e-13	41	101	92	111	210	229	191	259	37.08831	78.1141	87.18812	111.4963	209.4956	234.6494	200.1003	277.7556	Up Regulated
ENSG00000203804	ENSG00000203804.4	ADAMTSL4-AS1	150560202	150562115	-1	lncRNA	ADAMTSL4 antisense RNA 1 [Source:HGNC Symbol;Acc:HGNC:32041]	484.4153	1.068549	0.1490146	5.07e-14	7.47e-12	231	415	356	437	668	583	615	840	208.961	320.9639	337.3801	438.954	666.3956	597.3825	644.3019	900.8289	Up Regulated
ENSG00000277452	ENSG00000277452.1	RN7SL473P	150566562	150566860	-1	mRNA	RNA, 7SL, cytoplasmic 473, pseudogene [Source:HGNC Symbol;Acc:HGNC:46489]	97.19467	1.189032	0.2423948	5.365029e-08	1.965592e-06	23	59	60	83	94	107	115	162	20.80564	45.63101	56.86182	83.37112	93.77423	109.6397	120.4792	173.7313	Up Regulated
ENSG00000203804	ENSG00000203804.4	ADAMTSL4-AS1	150560202	150562115	-1	lncRNA	ADAMTSL4 antisense RNA 1 [Source:HGNC Symbol;Acc:HGNC:32041]	484.4153	1.068549	0.1490146	5.07e-14	7.47e-12	231	415	356	437	668	583	615	840	208.961	320.9639	337.3801	438.954	666.3956	597.3825	644.3019	900.8289	Up Regulated
ENSG00000143382	ENSG00000143382.14	ADAMTSL4	150549369	150560937	1	mRNA	ADAMTS like 4 [Source:HGNC Symbol;Acc:HGNC:19706]	728.1196	0.5614193	0.2246423	0.001296595	0.007810334	434	731	546	504	791	723	675	880	392.5933	565.3605	517.4426	506.2535	789.1002	740.8362	707.1606	943.7255	Up Regulated
ENSG00000284738	ENSG00000284738.1		153923284	153935245	1	lncRNA	novel transcript, antisense to DENND4B	39.88362	0.4051422	0.2169605	0.01030551	0.04056697	25	50	31	17	41	39	35	39	22.61482	38.67035	29.37861	17.07601	40.90153	39.96212	36.66759	41.8242	Up Regulated
ENSG00000198837	ENSG00000198837.10	DENND4B	153929501	153946718	-1	mRNA	DENN domain containing 4B [Source:HGNC Symbol;Acc:HGNC:29044]	4613.306	0.4252677	0.1428982	0.0005556123	0.003986435	4608	5656	4678	4280	6454	5809	5502	5610	4168.364	4374.39	4433.326	4299.137	6438.499	5952.306	5764.145	6016.25	Up Regulated
ENSG00000231064	ENSG00000231064.7	THBS3-AS1	155194996	155205495	1	lncRNA	THBS3 antisense RNA 1 [Source:HGNC Symbol;Acc:HGNC:40582]	98.50922	0.5912951	0.1666247	4.33e-05	0.00050416	91	84	96	126	143	164	119	127	82.31796	64.96619	90.97891	126.5634	142.6565	168.0458	124.6698	136.1968	Up Regulated
ENSG00000169231	ENSG00000169231.13	THBS3	155195588	155209051	-1	mRNA	thrombospondin 3 [Source:HGNC Symbol;Acc:HGNC:11787]	690.973	0.5467532	0.1322318	4.799606e-06	8.037065e-05	723	716	747	703	1035	1011	868	908	654.0207	553.7594	707.9296	706.1433	1032.514	1035.941	909.3562	973.7532	Up Regulated
ENSG00000227741	ENSG00000227741.1		160202199	160208869	-1	lncRNA	novel transcript	129.4221	1.557452	0.1502225	2.14e-26	1.03e-23	63	94	67	89	199	211	198	209	56.98936	72.70026	63.4957	89.39795	198.522	216.2053	207.4338	224.1348	Up Regulated
ENSG00000162734	ENSG00000162734.12	PEA15	160205380	160215376	1	mRNA	proliferation and apoptosis adaptor protein 15 [Source:HGNC Symbol;Acc:HGNC:8822]	6700.081	0.2229282	0.09702113	0.01120341	0.04327129	4558	4933	4311	3824	5265	4827	4164	4042	4123.135	3815.217	4085.522	3841.098	5252.355	4946.081	4362.395	4334.703	Up Regulated
ENSG00000228606	ENSG00000228606.2	DCAF8-DT	160261731	160263328	1	lncRNA	DCAF8 divergent transcript [Source:HGNC Symbol;Acc:HGNC:55792]	75.64464	0.7809442	0.1931605	4.43e-06	7.5e-05	46	69	46	46	93	86	66	80	41.61128	53.36508	43.59406	46.20568	92.77663	88.1216	69.14459	85.79323	Up Regulated
ENSG00000224261	ENSG00000224261.2	RPSAP18	160266340	160267225	-1	mRNA	ribosomal protein SA pseudogene 18 [Source:HGNC Symbol;Acc:HGNC:36106]	42.42019	1.697062	0.2576771	2.732864e-12	3.000537e-10	16	12	22	20	43	55	56	55	14.47349	9.280884	20.84933	20.08943	42.89672	56.35684	58.66814	58.98285	Up Regulated
ENSG00000228606	ENSG00000228606.2	DCAF8-DT	160261731	160263328	1	lncRNA	DCAF8 divergent transcript [Source:HGNC Symbol;Acc:HGNC:55792]	75.64464	0.7809442	0.1931605	4.43e-06	7.5e-05	46	69	46	46	93	86	66	80	41.61128	53.36508	43.59406	46.20568	92.77663	88.1216	69.14459	85.79323	Up Regulated
ENSG00000258465	ENSG00000258465.7		160216800	160285130	-1	mRNA	novel protein	15.34688	1.418284	0.4613587	0.0001220514	0.001174933	2	2	9	6	18	16	11	8	1.809186	1.546814	8.529273	6.026828	17.95677	16.39472	11.5241	8.579323	Up Regulated
ENSG00000228606	ENSG00000228606.2	DCAF8-DT	160261731	160263328	1	lncRNA	DCAF8 divergent transcript [Source:HGNC Symbol;Acc:HGNC:55792]	75.64464	0.7809442	0.1931605	4.43e-06	7.5e-05	46	69	46	46	93	86	66	80	41.61128	53.36508	43.59406	46.20568	92.77663	88.1216	69.14459	85.79323	Up Regulated
ENSG00000132716	ENSG00000132716.18	DCAF8	160215715	160262549	-1	mRNA	DDB1 and CUL4 associated factor 8 [Source:HGNC Symbol;Acc:HGNC:24891]	1630.617	0.2343581	0.05747431	2.410536e-05	0.0003116665	1502	1709	1513	1441	1690	1606	1564	1507	1358.699	1321.753	1433.866	1447.443	1685.941	1645.62	1638.517	1616.13	Up Regulated
ENSG00000273129	ENSG00000273129.1	PACERR	186680601	186683165	1	lncRNA	PTGS2 antisense NFKB1 complex-mediated expression regulator RNA [Source:HGNC Symbol;Acc:HGNC:50552]	12.62117	1.98333	0.5334278	1.11e-05	0.000162799	3	12	5	3	29	21	14	28	2.713779	9.280884	4.738485	3.013414	28.93035	21.51806	14.66704	30.02763	Up Regulated
ENSG00000073756	ENSG00000073756.12	PTGS2	186671791	186680922	-1	mRNA	prostaglandin-endoperoxide synthase 2 [Source:HGNC Symbol;Acc:HGNC:9605]	765.2004	4.212703	0.6011295	1.057306e-13	1.460952e-11	72	90	57	75	1119	1138	1500	1530	65.13069	69.60663	54.01873	75.33535	1116.312	1166.074	1571.468	1640.796	Up Regulated
ENSG00000233791	ENSG00000233791.5	BTG2-DT	203298758	203305315	-1	lncRNA	BTG2 divergent transcript [Source:HGNC Symbol;Acc:HGNC:49452]	44.57061	1.910691	0.2171774	8.84e-20	2.53e-17	33	25	28	24	91	102	110	70	29.85157	19.33517	26.53552	24.10731	90.78144	104.5163	115.241	75.06908	Up Regulated
ENSG00000159388	ENSG00000159388.6	BTG2	203305491	203309602	1	mRNA	BTG anti-proliferation factor 2 [Source:HGNC Symbol;Acc:HGNC:1131]	3416.018	2.056439	0.1866466	1.738025e-29	1.103211e-26	2286	1971	1518	1069	5880	5975	6870	6339	2067.9	1524.385	1438.604	1073.78	5865.878	6122.402	7197.324	6798.041	Up Regulated
ENSG00000235862	ENSG00000235862.2		212624284	212626771	-1	lncRNA	novel transcript	19.71441	2.615665	0.5743874	4.11e-07	1.06e-05	5	0	4	2	18	17	23	12	4.522965	0	3.790788	2.008943	17.95677	17.41939	24.09584	12.86898	Up Regulated
ENSG00000162772	ENSG00000162772.17	ATF3	212565334	212620777	1	mRNA	activating transcription factor 3 [Source:HGNC Symbol;Acc:HGNC:785]	22097.55	2.632874	0.1954061	1.174995e-42	1.70475e-39	4724	2993	6002	4023	24671	25745	25129	24182	4273.297	2314.807	5688.077	4040.988	24611.75	26380.12	26326.28	25933.15	Up Regulated
ENSG00000234478	ENSG00000234478.1	ACBD3-AS1	226148003	226155071	1	lncRNA	ACBD3 antisense RNA 1 [Source:HGNC Symbol;Acc:HGNC:40701]	19.26391	-0.6664928	0.3253315	0.003061516	0.01555416	26	25	24	20	11	13	10	11	23.51942	19.33517	22.74473	20.08943	10.97358	13.32071	10.47645	11.79657	Down Regulated
ENSG00000182827	ENSG00000182827.9	ACBD3	226144679	226186741	-1	mRNA	acyl-CoA binding domain containing 3 [Source:HGNC Symbol;Acc:HGNC:15453]	2443.804	-0.2884421	0.0691117	1.202183e-05	0.0001737988	1879	2215	1523	1810	1281	1369	1362	1216	1699.73	1713.096	1443.342	1818.093	1277.923	1402.773	1426.893	1304.057	Down Regulated
ENSG00000286071	ENSG00000286071.1		231767464	231847803	-1	lncRNA	disrupted in schizophrenia 2	1186.906	0.3532274	0.164292	0.007461102	0.03143537	1445	1945	2645	2147	2436	2267	2277	2766	1307.137	1504.277	2506.659	2156.6	2430.149	2322.926	2385.489	2966.301	Up Regulated
ENSG00000162946	ENSG00000162946.22	DISC1	231626790	232041272	1	mRNA	DISC1 scaffold protein [Source:HGNC Symbol;Acc:HGNC:2888]	3027.328	0.2794468	0.0589371	9.09276e-07	2.034055e-05	3263	4269	3929	3109	3919	3857	3740	3960	2951.687	3301.674	3723.501	3122.901	3909.587	3952.151	3918.194	4246.765	Up Regulated
ENSG00000226758	ENSG00000226758.1	DISC1-IT1	231925834	231945233	1	lncRNA	DISC1 intronic transcript 1 [Source:HGNC Symbol;Acc:HGNC:41325]	97.69626	0.6651439	0.2287919	0.000315148	0.002555401	78	152	181	144	214	209	169	242	70.55825	117.5579	171.5332	144.6439	213.486	214.156	177.0521	259.5245	Up Regulated
ENSG00000162946	ENSG00000162946.22	DISC1	231626790	232041272	1	mRNA	DISC1 scaffold protein [Source:HGNC Symbol;Acc:HGNC:2888]	3027.328	0.2794468	0.0589371	9.09276e-07	2.034055e-05	3263	4269	3929	3109	3919	3857	3740	3960	2951.687	3301.674	3723.501	3122.901	3909.587	3952.151	3918.194	4246.765	Up Regulated
ENSG00000231663	ENSG00000231663.1	COA6-AS1	234372807	234373664	-1	lncRNA	COA6 antisense RNA 1 [Source:HGNC Symbol;Acc:HGNC:40825]	29.80632	-0.5664288	0.2554704	0.002780248	0.01442094	48	49	28	34	25	22	19	18	43.42046	37.89694	26.53552	34.15202	24.93996	22.54273	19.90526	19.30348	Down Regulated
ENSG00000168275	ENSG00000168275.15	COA6	234373456	234385080	1	mRNA	cytochrome c oxidase assembly factor 6 [Source:HGNC Symbol;Acc:HGNC:18025]	647.8294	-0.2164703	0.08371429	0.005317025	0.02410701	416	552	461	529	351	400	380	319	376.3107	426.9207	436.8883	531.3653	350.157	409.8679	398.1052	342.1005	Down Regulated
ENSG00000273058	ENSG00000273058.2		236536162	236536704	-1	lncRNA	novel transcript	66.13522	-0.4070143	0.182451	0.004642432	0.02167251	82	106	74	116	63	52	55	63	74.17662	81.98114	70.12958	116.5187	62.84869	53.28283	57.6205	67.56217	Down Regulated
ENSG00000116977	ENSG00000116977.18	LGALS8	236518000	236552981	1	mRNA	galectin 8 [Source:HGNC Symbol;Acc:HGNC:6569]	3145.123	-0.246497	0.0577129	9.724687e-06	0.0001452411	3148	3592	2747	2353	2159	2244	2099	2073	2847.659	2778.078	2603.324	2363.521	2153.815	2299.359	2199.008	2223.117	Down Regulated
ENSG00000233355	ENSG00000233355.7	CHRM3-AS2	239703381	239770130	-1	lncRNA	CHRM3 antisense RNA 2 [Source:HGNC Symbol;Acc:HGNC:43725]	575.4296	0.5151696	0.2152937	0.001973829	0.01097821	430	197	535	237	585	461	430	452	388.975	152.3612	507.0179	238.0597	583.595	472.3727	450.4875	484.7318	Up Regulated
ENSG00000133019	ENSG00000133019.11	CHRM3	239386565	239915452	1	mRNA	cholinergic receptor muscarinic 3 [Source:HGNC Symbol;Acc:HGNC:1952]	1584.271	0.3688373	0.1629096	0.005209306	0.02371921	851	479	974	362	939	845	733	690	769.8086	370.4619	923.0569	363.6186	936.7447	865.8459	767.9241	739.9666	Up Regulated
ENSG00000234601	ENSG00000234601.1	CHRM3-AS1	239898016	239899872	-1	lncRNA	CHRM3 antisense RNA 1 [Source:HGNC Symbol;Acc:HGNC:40150]	19.68026	0.5516974	0.3833245	0.01060386	0.04145802	14	5	20	6	23	15	14	19	12.6643	3.867035	18.95394	6.026828	22.94476	15.37005	14.66704	20.37589	Up Regulated
ENSG00000133019	ENSG00000133019.11	CHRM3	239386565	239915452	1	mRNA	cholinergic receptor muscarinic 3 [Source:HGNC Symbol;Acc:HGNC:1952]	1584.271	0.3688373	0.1629096	0.005209306	0.02371921	851	479	974	362	939	845	733	690	769.8086	370.4619	923.0569	363.6186	936.7447	865.8459	767.9241	739.9666	Up Regulated
ENSG00000237943	ENSG00000237943.6	PRKCQ-AS1	6580419	6616921	1	lncRNA	PRKCQ antisense RNA 1 [Source:HGNC Symbol;Acc:HGNC:44689]	47.94363	-0.5025871	0.1638993	0.000307526	0.002505604	90	126	96	114	54	76	57	62	81.41337	97.44928	90.97891	114.5097	53.8703	77.8749	59.71579	66.48975	Down Regulated
ENSG00000065675	ENSG00000065675.14	PRKCQ	6427143	6580301	-1	mRNA	protein kinase C theta [Source:HGNC Symbol;Acc:HGNC:9410]	54.40472	-0.3574367	0.1502864	0.004205832	0.02008673	154	172	89	118	90	82	94	77	139.3073	133.026	84.34503	118.5276	89.78384	84.02292	98.47866	82.57599	Down Regulated
ENSG00000228302	ENSG00000228302.2		12244751	12247845	-1	lncRNA	novel transcript	62.46987	0.273089	0.1251843	0.01320854	0.04909273	93	127	122	98	116	136	103	121	84.12715	98.22269	115.619	98.43819	115.7214	139.3551	107.9075	129.7623	Up Regulated
ENSG00000151465	ENSG00000151465.14	CDC123	12195965	12250589	1	mRNA	cell division cycle 123 [Source:HGNC Symbol;Acc:HGNC:16827]	1117.607	-0.215561	0.07161186	0.001470344	0.008624204	1659	1729	1335	1290	1192	1240	1023	999	1500.72	1337.221	1265.175	1295.768	1189.137	1270.59	1071.741	1071.343	Down Regulated
ENSG00000229124	ENSG00000229124.6	VIM-AS1	17214239	17230018	-1	lncRNA	VIM antisense RNA 1 [Source:HGNC Symbol;Acc:HGNC:44879]	407.5224	0.652278	0.152437	1.95e-06	3.85e-05	325	368	439	384	503	563	525	580	293.9927	284.6138	416.039	385.717	501.7919	576.8891	550.0138	622.0009	Up Regulated
ENSG00000026025	ENSG00000026025.16	VIM	17228241	17237593	1	mRNA	vimentin [Source:HGNC Symbol;Acc:HGNC:12692]	15112.81	0.7856855	0.1023473	1.518941e-15	2.682847e-13	10478	14442	11327	8471	16862	17017	17213	16396	9478.325	11169.54	10734.56	8508.876	16821.5	17436.8	18033.12	17583.32	Up Regulated
ENSG00000165511	ENSG00000165511.6	ZNF22-AS1	44997698	45000888	-1	lncRNA	ZNF22 antisense RNA 1 [Source:HGNC Symbol;Acc:HGNC:23509]	71.15712	-0.6621655	0.1682538	8.57e-06	0.000130953	108	140	64	93	44	52	56	59	97.69604	108.277	60.65261	93.41583	43.89432	53.28283	58.66814	63.27251	Down Regulated
ENSG00000165512	ENSG00000165512.5	ZNF22	45000923	45005326	1	mRNA	zinc finger protein 22 [Source:HGNC Symbol;Acc:HGNC:13012]	261.1338	-0.6316515	0.1327109	2.201371e-07	6.285424e-06	273	426	219	295	175	164	171	146	246.9539	329.4714	207.5456	296.319	174.5797	168.0458	179.1474	156.5726	Down Regulated
ENSG00000241577	ENSG00000241577.1		48883955	48935213	-1	lncRNA	novel transcript, sense intronic to LRRC18	50.47019	0.3526953	0.1851317	0.0125092	0.04707927	60	78	88	81	86	85	90	107	54.27558	60.32574	83.39733	81.36218	85.79345	87.09693	94.28808	114.7484	Up Regulated
ENSG00000128815	ENSG00000128815.19	WDFY4	48684873	48982956	1	mRNA	WDFY family member 4 [Source:HGNC Symbol;Acc:HGNC:29323]	6011.883	0.2667089	0.1148597	0.008186844	0.03386579	8331	9589	8391	7469	9637	9054	8756	8950	7536.164	7416.2	7952.125	7502.396	9613.854	9277.36	9173.183	9598.118	Up Regulated
ENSG00000238280	ENSG00000238280.2		62682652	62805887	-1	lncRNA	novel transcript	30.55554	-0.6550991	0.3748279	0.005397362	0.02439243	32	13	13	24	11	9	8	10	28.94697	10.05429	12.32006	24.10731	10.97358	9.222028	8.381163	10.72415	Down Regulated
ENSG00000181915	ENSG00000181915.4	ADO	62804720	62808479	1	mRNA	2-aminoethanethiol dioxygenase [Source:HGNC Symbol;Acc:HGNC:23506]	1340.159	-0.3478148	0.1085014	0.0003778994	0.002953403	1549	1486	960	1077	900	917	824	729	1401.215	1149.283	909.7891	1081.816	897.8384	939.6221	863.2598	781.7908	Down Regulated
ENSG00000224596	ENSG00000224596.7	ZMIZ1-AS1	78943328	79067895	-1	lncRNA	ZMIZ1 antisense RNA 1 [Source:HGNC Symbol;Acc:HGNC:27433]	485.2937	0.6489069	0.1696779	1.31e-05	0.000186659	118	111	166	93	179	188	161	174	106.742	85.84817	157.3177	93.41583	178.5701	192.6379	168.6709	186.6003	Up Regulated
ENSG00000108175	ENSG00000108175.17	ZMIZ1	79068966	79316519	1	mRNA	zinc finger MIZ-type containing 1 [Source:HGNC Symbol;Acc:HGNC:16493]	3267.471	0.3901158	0.1424026	0.001337817	0.008016024	4856	4828	4082	3533	6113	4429	4516	5479	4392.703	3734.009	3868.499	3548.797	6098.318	4538.262	4731.166	5875.764	Up Regulated
ENSG00000271933	ENSG00000271933.1		84138420	84140582	-1	lncRNA	novel transcript, antisense to GHITM	67.89673	0.3583279	0.1523674	0.004443628	0.02096608	79	86	95	105	102	107	93	128	71.46284	66.513	90.03121	105.4695	101.755	109.6397	97.43102	137.2692	Up Regulated
ENSG00000165678	ENSG00000165678.21	GHITM	84139482	84154841	1	mRNA	growth hormone inducible transmembrane protein [Source:HGNC Symbol;Acc:HGNC:17281]	2525.99	-0.2015017	0.0571531	0.0002591257	0.002179446	2867	3447	2742	2573	2202	2267	2266	1990	2593.468	2665.934	2598.585	2584.505	2196.711	2322.926	2373.964	2134.107	Down Regulated
ENSG00000227896	ENSG00000227896.2	WAPL-DT	86521945	86525101	1	lncRNA	WAPL divergent transcript [Source:HGNC Symbol;Acc:HGNC:55805]	17.50498	-0.8757258	0.2846598	0.000143663	0.001340382	30	56	31	53	23	13	22	15	27.13779	43.31079	29.37861	53.23698	22.94476	13.32071	23.0482	16.08623	Down Regulated
ENSG00000062650	ENSG00000062650.19	WAPL	86435256	86521792	-1	mRNA	WAPL cohesin release factor [Source:HGNC Symbol;Acc:HGNC:23293]	2970.402	-0.1680233	0.06008466	0.003621796	0.01777813	4078	4966	4070	3502	3014	3167	3355	3190	3688.93	3840.739	3857.127	3517.659	3006.761	3245.129	3514.85	3421.005	Down Regulated
ENSG00000236308	ENSG00000236308.1		100190036	100190747	1	lncRNA	novel transcript, antisense to CHUK	11.01365	-0.5455071	0.3158134	0.007278828	0.03082726	25	33	33	30	15	16	17	14	22.61482	25.52243	31.274	30.13414	14.96397	16.39472	17.80997	15.01382	Down Regulated
ENSG00000213341	ENSG00000213341.11	CHUK	100188300	100229596	-1	mRNA	component of inhibitor of nuclear factor kappa B kinase complex [Source:HGNC Symbol;Acc:HGNC:1974]	738.2935	-0.2669829	0.07953911	0.0003431862	0.002737941	985	1218	878	1008	781	747	705	683	891.0241	942.0097	832.0779	1012.507	779.1242	765.4283	738.59	732.4597	Down Regulated
ENSG00000236308	ENSG00000236308.1		100190036	100190747	1	lncRNA	novel transcript, antisense to CHUK	11.01365	-0.5455071	0.3158134	0.007278828	0.03082726	25	33	33	30	15	16	17	14	22.61482	25.52243	31.274	30.13414	14.96397	16.39472	17.80997	15.01382	Down Regulated
ENSG00000107566	ENSG00000107566.14	ERLIN1	100150094	100186033	-1	mRNA	ER lipid raft associated 1 [Source:HGNC Symbol;Acc:HGNC:16947]	773.6523	-0.4185024	0.08559605	1.279957e-07	4.043312e-06	2118	3405	1706	2107	1462	1493	1501	1411	1915.928	2633.451	1616.771	2116.421	1458.489	1529.832	1572.516	1513.178	Down Regulated
ENSG00000269609	ENSG00000269609.5	C10orf95-AS1	102449816	102461106	1	lncRNA	C10orf95 antisense RNA 1 [Source:HGNC Symbol;Acc:HGNC:45238]	114.4998	-0.5626498	0.1348879	2.83e-06	5.24e-05	172	261	156	145	126	85	109	92	155.59	201.8592	147.8407	145.6483	125.6974	87.09693	114.1933	98.66222	Down Regulated
ENSG00000138111	ENSG00000138111.14	MFSD13A	102461395	102477045	1	mRNA	major facilitator superfamily domain containing 13A [Source:HGNC Symbol;Acc:HGNC:26196]	329.546	0.4326916	0.1355554	0.0004029328	0.003100656	514	564	547	300	587	616	579	528	464.9608	436.2015	518.3902	301.3414	585.5902	631.1966	606.5867	566.2353	Up Regulated
ENSG00000280693	ENSG00000280693.2	SH3PXD2A-AS1	103745966	103755423	1	lncRNA	SH3PXD2A antisense RNA 1 [Source:HGNC Symbol;Acc:HGNC:45242]	27.94314	0.7903371	0.2623325	0.000217993	0.001887415	36	22	38	22	52	37	38	67	32.56535	17.01495	36.01249	22.09837	51.87511	37.91278	39.81052	71.85183	Up Regulated
ENSG00000107957	ENSG00000107957.16	SH3PXD2A	103594027	103855584	-1	mRNA	SH3 and PX domains 2A [Source:HGNC Symbol;Acc:HGNC:23664]	1279.691	0.3893323	0.08120118	4.085506e-07	1.049113e-05	1677	1757	1728	1674	2076	1829	1919	2117	1517.002	1358.876	1637.62	1681.485	2071.014	1874.121	2010.431	2270.303	Up Regulated
ENSG00000228261	ENSG00000228261.1	ITPRIP-AS1	104323369	104327004	1	lncRNA	ITPRIP antisense RNA 1 [Source:HGNC Symbol;Acc:HGNC:54100]	30.82247	1.323069	0.2048157	6.63e-12	6.8e-10	25	60	47	49	90	89	90	139	22.61482	46.40442	44.54176	49.21909	89.78384	91.19561	94.28808	149.0657	Up Regulated
ENSG00000148841	ENSG00000148841.17	ITPRIP	104309698	104338465	-1	mRNA	inositol 1,4,5-trisphosphate receptor interacting protein [Source:HGNC Symbol;Acc:HGNC:29370]	796.2391	0.3440576	0.1232448	0.001447198	0.008520434	889	1008	746	977	1095	966	1038	1045	804.1831	779.5942	706.9819	981.3685	1092.37	989.831	1087.456	1120.674	Up Regulated
ENSG00000232934	ENSG00000232934.7		112395813	112425589	-1	lncRNA	novel transcript, antisense to ACSL5	58.96238	0.8506115	0.2097593	3.67e-06	6.44e-05	50	66	68	72	89	97	106	135	45.22965	51.04486	64.44339	72.32193	88.78624	99.39296	111.0504	144.7761	Up Regulated
ENSG00000023041	ENSG00000023041.11	ZDHHC6	112424428	112447572	-1	mRNA	zinc finger DHHC-type palmitoyltransferase 6 [Source:HGNC Symbol;Acc:HGNC:19160]	933.6291	-0.1899923	0.08209141	0.01276794	0.04788923	1418	1732	1354	1162	1105	1118	1019	1003	1282.713	1339.541	1283.182	1167.196	1102.346	1145.581	1067.551	1075.633	Down Regulated
ENSG00000183242	ENSG00000183242.11	WT1-AS	32435518	32500632	1	lncRNA	WT1 antisense RNA [Source:HGNC Symbol;Acc:HGNC:18135]	133.2261	-0.5870759	0.1639884	3.9e-05	0.000461994	261	300	210	343	164	156	159	142	236.0988	232.0221	199.0164	344.5337	163.6061	159.8485	166.5756	152.283	Down Regulated
ENSG00000184937	ENSG00000184937.14	WT1	32387775	32435564	-1	mRNA	WT1 transcription factor [Source:HGNC Symbol;Acc:HGNC:12796]	418.1289	-0.3092131	0.1202402	0.003263275	0.01636633	614	705	508	748	449	468	426	420	555.4201	545.2519	481.4301	751.3445	447.9216	479.5454	446.2969	450.4145	Down Regulated
ENSG00000283341	ENSG00000283341.1		43578889	43840030	1	lncRNA	novel transcript	20.19417	-1.338667	0.3807536	2.55e-05	0.000326347	17	32	38	25	7	10	9	8	15.37808	24.74902	36.01249	25.11178	6.983188	10.2467	9.428808	8.579323	Down Regulated
ENSG00000149084	ENSG00000149084.13	HSD17B12	43680680	43856617	1	mRNA	hydroxysteroid 17-beta dehydrogenase 12 [Source:HGNC Symbol;Acc:HGNC:18646]	1661.07	-0.3139297	0.07114997	3.631415e-06	6.402891e-05	1083	1579	1061	1284	937	903	783	838	979.6742	1221.21	1005.506	1289.741	934.7495	925.2768	820.3063	898.6841	Down Regulated
ENSG00000270072	ENSG00000270072.1		47513605	47514889	-1	lncRNA	novel transcript	36.96837	0.4903238	0.2776552	0.008094859	0.03361054	39	31	67	30	58	47	39	90	35.27913	23.97562	63.4957	30.13414	57.8607	48.15948	40.85817	96.51739	Up Regulated
ENSG00000149187	ENSG00000149187.18	CELF1	47465933	47565569	-1	mRNA	CUGBP Elav-like family member 1 [Source:HGNC Symbol;Acc:HGNC:2549]	7194.483	0.2559453	0.0549875	1.56282e-06	3.196778e-05	6898	7443	7158	6172	7749	7384	6943	6955	6239.882	5756.468	6783.615	6199.597	7730.389	7566.161	7273.802	7458.649	Up Regulated
ENSG00000279491	ENSG00000279491.1		61967729	61969490	1	lncRNA	TEC	80.32739	2.25272	0.1851059	2.98e-35	2.33e-32	45	37	32	33	155	174	157	137	40.70668	28.61606	30.3263	33.14755	154.6277	178.2925	164.4803	146.9209	Up Regulated
ENSG00000167996	ENSG00000167996.16	FTH1	61959718	61967634	-1	mRNA	ferritin heavy chain 1 [Source:HGNC Symbol;Acc:HGNC:3976]	4501.096	0.7420346	0.3267825	0.001452959	0.008541515	2336	3582	3291	2761	6163	5319	4623	3940	2113.129	2770.344	3118.871	2773.345	6148.198	5450.218	4843.265	4225.317	Up Regulated
ENSG00000279491	ENSG00000279491.1		61967729	61969490	1	lncRNA	TEC	80.32739	2.25272	0.1851059	2.98e-35	2.33e-32	45	37	32	33	155	174	157	137	40.70668	28.61606	30.3263	33.14755	154.6277	178.2925	164.4803	146.9209	Up Regulated
ENSG00000167995	ENSG00000167995.16	BEST1	61950063	61965515	1	mRNA	bestrophin 1 [Source:HGNC Symbol;Acc:HGNC:12703]	1417.908	0.5779383	0.09649194	2.817047e-10	2.080722e-08	810	1072	1006	842	1256	1243	1217	1213	732.7203	829.0923	953.3832	845.7648	1252.983	1273.664	1274.984	1300.84	Up Regulated
ENSG00000254510	ENSG00000254510.1		66409158	66417227	1	lncRNA	novel transcript	47.30638	0.599188	0.164072	2.95e-05	0.000367371	83	82	68	90	124	124	109	91	75.08122	63.41937	64.44339	90.40242	123.7022	127.059	114.1933	97.5898	Up Regulated
ENSG00000174576	ENSG00000174576.10	NPAS4	66421004	66426707	1	mRNA	neuronal PAS domain protein 4 [Source:HGNC Symbol;Acc:HGNC:18983]	21.53626	0.7553662	0.3079127	0.0009318318	0.006006781	31	34	28	50	58	59	62	61	28.04238	26.29584	26.53552	50.22357	57.8607	60.45551	64.95401	65.41734	Up Regulated
ENSG00000247137	ENSG00000247137.8	ANKRD42-DT	83184491	83193794	-1	lncRNA	ANKRD42 divergent transcript [Source:HGNC Symbol;Acc:HGNC:55590]	135.8977	0.5166756	0.1437996	5.99e-05	0.000658344	116	149	130	149	191	194	158	160	104.9328	115.2376	123.2006	149.6662	190.5413	198.7859	165.528	171.5865	Up Regulated
ENSG00000137494	ENSG00000137494.13	ANKRD42	83193712	83260694	1	mRNA	ankyrin repeat domain 42 [Source:HGNC Symbol;Acc:HGNC:26752]	456.1196	0.522865	0.1137658	6.30303e-07	1.502666e-05	433	322	486	576	670	612	577	524	391.6888	249.037	460.5807	578.5755	668.3908	627.0979	604.4914	561.9457	Up Regulated
ENSG00000254551	ENSG00000254551.1		83209431	83213379	-1	lncRNA	novel transcript	10.78777	0.7297343	0.4279511	0.005185431	0.0236317	8	3	14	22	22	22	22	19	7.236744	2.320221	13.26776	22.09837	21.94716	22.54273	23.0482	20.37589	Up Regulated
ENSG00000137494	ENSG00000137494.13	ANKRD42	83193712	83260694	1	mRNA	ankyrin repeat domain 42 [Source:HGNC Symbol;Acc:HGNC:26752]	456.1196	0.522865	0.1137658	6.30303e-07	1.502666e-05	433	322	486	576	670	612	577	524	391.6888	249.037	460.5807	578.5755	668.3908	627.0979	604.4914	561.9457	Up Regulated
ENSG00000254433	ENSG00000254433.1		106085990	106101975	-1	lncRNA	novel transcript	27.17173	-0.5069973	0.3078612	0.01062873	0.0415162	26	33	25	33	15	16	14	17	23.51942	25.52243	23.69242	33.14755	14.96397	16.39472	14.66704	18.23106	Down Regulated
ENSG00000149313	ENSG00000149313.11	AASDHPPT	106075501	106098699	1	mRNA	aminoadipate-semialdehyde dehydrogenase-phosphopantetheinyl transferase [Source:HGNC Symbol;Acc:HGNC:14235]	1229.953	-0.4729349	0.08286352	2.12794e-09	1.245612e-07	877	1237	890	733	590	578	610	514	793.328	956.7044	843.4503	736.2775	588.5829	592.2591	639.0637	551.2215	Down Regulated
ENSG00000256972	ENSG00000256972.1		115333577	115340262	1	lncRNA	novel transcript	67.58254	0.5713944	0.2028511	0.000529049	0.00384266	43	74	97	43	68	96	99	92	38.8975	57.23212	91.92661	43.19227	67.83668	98.36829	103.7169	98.66222	Up Regulated
ENSG00000182985	ENSG00000182985.17	CADM1	115169218	115504957	-1	mRNA	cell adhesion molecule 1 [Source:HGNC Symbol;Acc:HGNC:5951]	5352.922	0.2766197	0.1229933	0.009246496	0.03726485	4649	6216	5589	1833	4939	5125	4995	4496	4205.453	4807.498	5296.678	1841.196	4927.138	5251.432	5232.989	4821.58	Up Regulated
ENSG00000256315	ENSG00000256315.1	CADM1-AS1	115396756	115397658	1	lncRNA	CADM1 antisense RNA 1 [Source:HGNC Symbol;Acc:HGNC:56177]	145.0411	0.3872163	0.142447	0.001426527	0.008413361	106	134	209	145	179	180	185	168	95.88685	103.6365	198.0687	145.6483	178.5701	184.4406	193.8144	180.1658	Up Regulated
ENSG00000182985	ENSG00000182985.17	CADM1	115169218	115504957	-1	mRNA	cell adhesion molecule 1 [Source:HGNC Symbol;Acc:HGNC:5951]	5352.922	0.2766197	0.1229933	0.009246496	0.03726485	4649	6216	5589	1833	4939	5125	4995	4496	4205.453	4807.498	5296.678	1841.196	4927.138	5251.432	5232.989	4821.58	Up Regulated
ENSG00000255422	ENSG00000255422.3		118700415	118750263	1	lncRNA	novel transcript	132.6463	0.9112576	0.228912	4.84e-06	8.08e-05	49	91	112	12	124	116	111	104	44.32506	70.38004	106.1421	12.05366	123.7022	118.8617	116.2886	111.5312	Up Regulated
ENSG00000110367	ENSG00000110367.13	DDX6	118747763	118791164	-1	mRNA	DEAD-box helicase 6 [Source:HGNC Symbol;Acc:HGNC:2747]	5649.815	-0.2090188	0.08202118	0.006149825	0.02708483	7556	9142	6303	4920	5585	5041	4848	5013	6835.104	7070.487	5973.334	4941.999	5571.586	5165.36	5078.985	5376.018	Down Regulated
ENSG00000245248	ENSG00000245248.7	USP2-AS1	119356467	119659284	1	lncRNA	USP2 antisense RNA 1 [Source:HGNC Symbol;Acc:HGNC:48673]	210.3566	-0.3358558	0.1549985	0.007153653	0.03045581	301	236	182	218	160	153	141	159	272.2825	182.524	172.4809	218.9747	159.6157	156.7745	147.718	170.514	Down Regulated
ENSG00000036672	ENSG00000036672.16	USP2	119355215	119381711	-1	mRNA	ubiquitin specific peptidase 2 [Source:HGNC Symbol;Acc:HGNC:12618]	1146.866	0.3992462	0.1337622	0.0006092867	0.004286744	1291	1517	1251	749	1799	1309	1276	1292	1167.83	1173.258	1185.569	752.349	1794.679	1341.293	1336.795	1385.561	Up Regulated
ENSG00000250132	ENSG00000250132.6		974133	991190	-1	lncRNA	novel transcript	43.72911	-0.5720363	0.2081825	0.000508015	0.003718143	59	51	55	34	23	24	21	39	53.37098	39.44376	52.12333	34.15202	22.94476	24.59207	22.00055	41.8242	Down Regulated
ENSG00000082805	ENSG00000082805.20	ERC1	990509	1495933	1	mRNA	ELKS/RAB6-interacting/CAST family member 1 [Source:HGNC Symbol;Acc:HGNC:17072]	581.7547	0.1620865	0.06826362	0.01249365	0.04703819	756	814	727	750	799	670	760	771	683.8723	629.5533	688.9757	753.3535	797.081	686.5287	796.2105	826.8323	Up Regulated
ENSG00000226397	ENSG00000226397.8	LINC02909	24993424	25006403	-1	lncRNA	long intergenic non-protein coding RNA 2909 [Source:HGNC Symbol;Acc:HGNC:27282]	10.72233	-1.12231	0.5710888	0.001805938	0.01018385	62	45	15	12	10	9	14	7	56.08476	34.80331	14.21545	12.05366	9.975982	9.222028	14.66704	7.506908	Down Regulated
ENSG00000118308	ENSG00000118308.15	IRAG2	25004342	25108335	1	mRNA	inositol 1,4,5-triphosphate receptor associated 2 [Source:HGNC Symbol;Acc:HGNC:6690]	1915.215	-0.6863253	0.1433467	1.654867e-07	4.97808e-06	6005	5433	3739	3371	2603	2547	2301	2190	5432.081	4201.92	3543.439	3386.073	2596.748	2609.834	2410.632	2348.59	Down Regulated
ENSG00000258449	ENSG00000258449.1		25096868	25100980	-1	lncRNA	novel transcript, antisense to LRMP	19.05854	-0.8863834	0.3494854	0.00061606	0.004314972	66	71	50	56	24	22	23	30	59.70314	54.9119	47.38485	56.25039	23.94236	22.54273	24.09584	32.17246	Down Regulated
ENSG00000258546	ENSG00000258546.1	CENPUP2	25092715	25093900	-1	mRNA	centromere protein U pseudogene 2 [Source:HGNC Symbol;Acc:HGNC:49890]	60.70921	-0.6536591	0.2746444	0.001336927	0.008015248	264	196	154	115	96	96	73	94	238.8125	151.5878	145.9453	115.5142	95.76943	98.36829	76.47811	100.807	Down Regulated
ENSG00000258449	ENSG00000258449.1		25096868	25100980	-1	lncRNA	novel transcript, antisense to LRMP	19.05854	-0.8863834	0.3494854	0.00061606	0.004314972	66	71	50	56	24	22	23	30	59.70314	54.9119	47.38485	56.25039	23.94236	22.54273	24.09584	32.17246	Down Regulated
ENSG00000118308	ENSG00000118308.15	IRAG2	25004342	25108335	1	mRNA	inositol 1,4,5-triphosphate receptor associated 2 [Source:HGNC Symbol;Acc:HGNC:6690]	1915.215	-0.6863253	0.1433467	1.654867e-07	4.97808e-06	6005	5433	3739	3371	2603	2547	2301	2190	5432.081	4201.92	3543.439	3386.073	2596.748	2609.834	2410.632	2348.59	Down Regulated
ENSG00000276842	ENSG00000276842.1		25103124	25103869	-1	lncRNA	novel transcript, antisense to LRMP	110.8622	-0.4435674	0.2227844	0.006474223	0.02821983	363	242	209	182	139	143	141	157	328.3672	187.1645	198.0687	182.8138	138.6662	146.5278	147.718	168.3692	Down Regulated
ENSG00000118308	ENSG00000118308.15	IRAG2	25004342	25108335	1	mRNA	inositol 1,4,5-triphosphate receptor associated 2 [Source:HGNC Symbol;Acc:HGNC:6690]	1915.215	-0.6863253	0.1433467	1.654867e-07	4.97808e-06	6005	5433	3739	3371	2603	2547	2301	2190	5432.081	4201.92	3543.439	3386.073	2596.748	2609.834	2410.632	2348.59	Down Regulated
ENSG00000246695	ENSG00000246695.7	RASSF8-AS1	25936683	25959765	-1	lncRNA	RASSF8 antisense RNA 1 [Source:HGNC Symbol;Acc:HGNC:48637]	245.8718	-0.3390851	0.1180754	0.001157736	0.007163706	176	178	176	229	141	114	132	124	159.2084	137.6664	166.7947	230.0239	140.6613	116.8123	138.2892	132.9795	Down Regulated
ENSG00000123094	ENSG00000123094.15	RASSF8	25958232	26079892	1	mRNA	Ras association domain family member 8 [Source:HGNC Symbol;Acc:HGNC:13232]	1029.251	-0.2615758	0.09876857	0.003457641	0.01713384	564	561	545	553	343	436	399	409	510.1904	433.8813	516.4949	555.4726	342.1762	446.756	418.0105	438.6179	Down Regulated
ENSG00000247903	ENSG00000247903.1		26971586	26979582	1	lncRNA	novel transcript, antisense to TM7SF3	47.27652	-0.3501052	0.1593502	0.006786935	0.02926884	94	98	95	91	59	60	62	64	85.03174	75.79388	90.03121	91.40689	58.85829	61.48018	64.95401	68.63458	Down Regulated
ENSG00000064115	ENSG00000064115.11	TM7SF3	26971579	27014434	-1	mRNA	transmembrane 7 superfamily member 3 [Source:HGNC Symbol;Acc:HGNC:23049]	2352.223	-0.236704	0.07424109	0.0007273286	0.004926141	3436	4147	2846	2175	2426	2328	2293	2047	3108.181	3207.319	2697.146	2184.725	2420.173	2385.431	2402.251	2195.234	Down Regulated
ENSG00000247903	ENSG00000247903.1		26971586	26979582	1	lncRNA	novel transcript, antisense to TM7SF3	47.27652	-0.3501052	0.1593502	0.006786935	0.02926884	94	98	95	91	59	60	62	64	85.03174	75.79388	90.03121	91.40689	58.85829	61.48018	64.95401	68.63458	Down Regulated
ENSG00000111790	ENSG00000111790.14	FGFR1OP2	26938470	26966650	1	mRNA	FGFR1 oncogene partner 2 [Source:HGNC Symbol;Acc:HGNC:23098]	1852.473	-0.4132194	0.08301297	1.448317e-07	4.470854e-06	1393	1739	1559	1554	952	1041	1034	1006	1260.098	1344.955	1477.46	1560.948	949.7135	1066.681	1083.265	1078.85	Down Regulated
ENSG00000257258	ENSG00000257258.1		29142969	29158537	-1	lncRNA	novel transcript	379.283	-0.4582781	0.1866125	0.002084858	0.01145766	610	642	452	841	391	380	344	412	551.8017	496.5273	428.359	844.7604	390.0609	389.3745	360.39	441.8351	Down Regulated
ENSG00000064763	ENSG00000064763.11	FAR2	29149016	29341121	1	mRNA	fatty acyl-CoA reductase 2 [Source:HGNC Symbol;Acc:HGNC:25531]	4419.162	-0.8583873	0.1138258	3.828472e-15	6.374092e-13	13342	12927	5756	6978	4599	4770	4500	4219	12069.08	9997.832	5454.944	7009.201	4587.954	4887.675	4714.404	4524.521	Down Regulated
ENSG00000275278	ENSG00000275278.1		29156448	29156991	-1	lncRNA	novel transcript, antisense to FAR2	397.0524	-0.4542056	0.1716396	0.001277787	0.007733733	694	852	611	910	500	456	421	476	627.7875	658.9427	579.0429	914.0689	498.7991	467.2494	441.0587	510.4697	Down Regulated
ENSG00000064763	ENSG00000064763.11	FAR2	29149016	29341121	1	mRNA	fatty acyl-CoA reductase 2 [Source:HGNC Symbol;Acc:HGNC:25531]	4419.162	-0.8583873	0.1138258	3.828472e-15	6.374092e-13	13342	12927	5756	6978	4599	4770	4500	4219	12069.08	9997.832	5454.944	7009.201	4587.954	4887.675	4714.404	4524.521	Down Regulated
ENSG00000274315	ENSG00000274315.1		29331434	29331936	-1	lncRNA	novel transcript, antisense to FAR2	105.4424	-0.4439448	0.1364716	0.000205647	0.001802026	213	243	149	214	123	125	115	141	192.6783	187.9379	141.2068	214.9569	122.7046	128.0837	120.4792	151.2106	Down Regulated
ENSG00000064763	ENSG00000064763.11	FAR2	29149016	29341121	1	mRNA	fatty acyl-CoA reductase 2 [Source:HGNC Symbol;Acc:HGNC:25531]	4419.162	-0.8583873	0.1138258	3.828472e-15	6.374092e-13	13342	12927	5756	6978	4599	4770	4500	4219	12069.08	9997.832	5454.944	7009.201	4587.954	4887.675	4714.404	4524.521	Down Regulated
ENSG00000273680	ENSG00000273680.1		29332733	29333383	-1	lncRNA	novel transcript, antisense to FAR2	106.4175	-0.4440339	0.1252074	7.27e-05	0.000774523	280	224	149	176	122	141	130	120	253.286	173.2432	141.2068	176.787	121.707	144.4784	136.1939	128.6898	Down Regulated
ENSG00000087502	ENSG00000087502.18	ERGIC2	29337352	29381189	-1	mRNA	ERGIC and golgi 2 [Source:HGNC Symbol;Acc:HGNC:30208]	2042.243	-0.354702	0.08460523	7.886222e-06	0.0001228412	2257	2705	2225	2483	1509	1697	1659	1630	2041.666	2092.066	2108.626	2494.102	1505.376	1738.865	1738.044	1748.037	Down Regulated
ENSG00000273680	ENSG00000273680.1		29332733	29333383	-1	lncRNA	novel transcript, antisense to FAR2	106.4175	-0.4440339	0.1252074	7.27e-05	0.000774523	280	224	149	176	122	141	130	120	253.286	173.2432	141.2068	176.787	121.707	144.4784	136.1939	128.6898	Down Regulated
ENSG00000064763	ENSG00000064763.11	FAR2	29149016	29341121	1	mRNA	fatty acyl-CoA reductase 2 [Source:HGNC Symbol;Acc:HGNC:25531]	4419.162	-0.8583873	0.1138258	3.828472e-15	6.374092e-13	13342	12927	5756	6978	4599	4770	4500	4219	12069.08	9997.832	5454.944	7009.201	4587.954	4887.675	4714.404	4524.521	Down Regulated
ENSG00000257953	ENSG00000257953.1		57837092	57842745	1	lncRNA	novel transcript, antisense to CTDSP2	17.9477	-0.7230306	0.3162752	0.00152806	0.008880673	44	41	42	27	19	16	20	16	39.80209	31.70969	39.80327	27.12073	18.95437	16.39472	20.95291	17.15865	Down Regulated
ENSG00000175215	ENSG00000175215.11	CTDSP2	57819927	57846729	-1	mRNA	CTD small phosphatase 2 [Source:HGNC Symbol;Acc:HGNC:17077]	3695.614	-0.2387541	0.09422719	0.005441021	0.02453775	5530	5680	2924	3704	3550	3219	3105	2915	5002.399	4392.952	2771.066	3720.562	3541.474	3298.412	3252.939	3126.091	Down Regulated
ENSG00000277895	ENSG00000277895.1		64451591	64452901	-1	lncRNA	novel transcript, antisense to TBK1	50.89787	1.585664	0.2453784	6.72e-12	6.82e-10	28	24	22	15	70	58	74	42	25.3286	18.56177	20.84933	15.06707	69.83188	59.43084	77.52576	45.04145	Up Regulated
ENSG00000184575	ENSG00000184575.12	XPOT	64404392	64451125	1	mRNA	exportin for tRNA [Source:HGNC Symbol;Acc:HGNC:12826]	2914.739	-0.3321923	0.07671375	4.783233e-06	8.016257e-05	2668	3339	2626	3142	1990	2097	2091	1886	2413.454	2582.406	2488.652	3156.049	1985.22	2148.732	2190.626	2022.575	Down Regulated
ENSG00000250748	ENSG00000250748.6	MSRB3-AS1	65466820	65642372	-1	lncRNA	MSRB3 antisense RNA 1 [Source:HGNC Symbol;Acc:HGNC:53386]	48.40008	-0.79557	0.5160323	0.00634011	0.02774242	19	5	9	16	5	2	7	5	17.18727	3.867035	8.529273	16.07154	4.987991	2.049339	7.333518	5.362077	Down Regulated
ENSG00000174099	ENSG00000174099.11	MSRB3	65278643	65491430	1	mRNA	methionine sulfoxide reductase B3 [Source:HGNC Symbol;Acc:HGNC:27375]	276.6374	-0.910161	0.2142253	1.445906e-06	3.009144e-05	634	990	475	1561	392	423	406	406	573.5119	765.6729	450.1561	1567.98	391.0585	433.4353	425.344	435.4006	Down Regulated
ENSG00000257497	ENSG00000257497.2	GLIPR1-AS1	75483454	75489820	-1	lncRNA	GLIPR1 antisense RNA 1 [Source:HGNC Symbol;Acc:HGNC:56075]	156.4165	0.7684584	0.1448891	1.02e-08	4.84e-07	152	168	200	105	238	250	238	229	137.4981	129.9324	189.5394	105.4695	237.4284	256.1674	249.3396	245.5831	Up Regulated
ENSG00000139278	ENSG00000139278.10	GLIPR1	75480753	75503863	1	mRNA	GLI pathogenesis related 1 [Source:HGNC Symbol;Acc:HGNC:17001]	3227.194	0.274317	0.1154935	0.006819722	0.02937075	2781	3021	2699	1202	2538	2828	2616	2394	2515.673	2336.462	2557.834	1207.375	2531.904	2897.766	2740.64	2567.362	Up Regulated
ENSG00000258225	ENSG00000258225.1		78052181	78091737	-1	lncRNA	novel transcript, antisense to NAV3	9.938581	1.501545	0.4588907	4.83e-05	0.000550928	5	9	16	15	11	30	44	46	4.522965	6.960663	15.16315	15.06707	10.97358	30.74009	46.0964	49.33111	Up Regulated
ENSG00000067798	ENSG00000067798.16	NAV3	77324641	78213010	1	mRNA	neuron navigator 3 [Source:HGNC Symbol;Acc:HGNC:15998]	977.6688	0.9422493	0.2338971	3.735126e-06	6.512265e-05	299	1193	1620	1181	1686	1779	2204	2072	270.4733	922.6745	1535.269	1186.281	1681.951	1822.887	2309.01	2222.045	Up Regulated
ENSG00000257467	ENSG00000257467.5	PPFIA2-AS1	81270669	81312422	1	lncRNA	PPFIA2 antisense RNA 1 [Source:HGNC Symbol;Acc:HGNC:53397]	30.32076	-2.068804	0.4343908	1.02e-07	3.35e-06	97	40	22	40	14	9	9	5	87.74552	30.93628	20.84933	40.17885	13.96638	9.222028	9.428808	5.362077	Down Regulated
ENSG00000139220	ENSG00000139220.16	PPFIA2	81257975	81759553	-1	mRNA	PTPRF interacting protein alpha 2 [Source:HGNC Symbol;Acc:HGNC:9246]	298.6735	-2.671676	0.3589529	4.800841e-15	7.864088e-13	721	300	65	421	54	51	50	40	652.2115	232.0221	61.6003	422.8824	53.8703	52.25816	52.38227	42.89662	Down Regulated
ENSG00000258162	ENSG00000258162.3		81378042	81556637	1	lncRNA	novel transcript, antisense to PPFIA2	35.5777	-2.808785	0.4890961	6.31e-10	4.15e-08	91	24	10	52	7	3	4	6	82.31796	18.56177	9.47697	52.23251	6.983188	3.074009	4.190581	6.434492	Down Regulated
ENSG00000139220	ENSG00000139220.16	PPFIA2	81257975	81759553	-1	mRNA	PTPRF interacting protein alpha 2 [Source:HGNC Symbol;Acc:HGNC:9246]	298.6735	-2.671676	0.3589529	4.800841e-15	7.864088e-13	721	300	65	421	54	51	50	40	652.2115	232.0221	61.6003	422.8824	53.8703	52.25816	52.38227	42.89662	Down Regulated
ENSG00000274021	ENSG00000274021.1		89351015	89353271	1	lncRNA	novel transcript, antisense to DUSP6	160.5712	1.576839	0.1571847	1.82e-25	7.72e-23	73	75	78	46	214	210	171	137	66.03529	58.00552	73.92036	46.20568	213.486	215.1806	179.1474	146.9209	Up Regulated
ENSG00000139318	ENSG00000139318.8	DUSP6	89347235	89352501	-1	mRNA	dual specificity phosphatase 6 [Source:HGNC Symbol;Acc:HGNC:3072]	16562.17	0.664163	0.0887501	8.179225e-15	1.287879e-12	6381	7195	9108	5226	9877	10645	9918	8720	5772.208	5564.663	8631.624	5249.367	9853.278	10907.61	10390.55	9351.462	Up Regulated
ENSG00000258136	ENSG00000258136.1	PRDM4-AS1	107736555	107759968	1	lncRNA	PRDM4 antisense RNA 1 [Source:HGNC Symbol;Acc:HGNC:56186]	35.83658	-0.7918387	0.2544647	0.000138545	0.001302835	42	53	76	33	24	19	19	32	37.9929	40.99057	72.02497	33.14755	23.94236	19.46872	19.90526	34.31729	Down Regulated
ENSG00000110851	ENSG00000110851.12	PRDM4	107732871	107761272	-1	mRNA	PR/SET domain 4 [Source:HGNC Symbol;Acc:HGNC:9348]	1234.721	0.1776197	0.05538664	0.0009143877	0.005914982	874	984	1000	736	937	945	878	801	790.6143	761.0325	947.697	739.2909	934.7495	968.3129	919.8326	859.0047	Up Regulated
ENSG00000234608	ENSG00000234608.7	MAPKAPK5-AS1	111839758	111842902	-1	lncRNA	MAPKAPK5 antisense RNA 1 [Source:HGNC Symbol;Acc:HGNC:24091]	248.4642	-0.343664	0.09736752	8.31e-05	0.000863219	209	289	214	214	173	165	138	141	189.0599	223.5146	202.8072	214.9569	172.5845	169.0705	144.5751	151.2106	Down Regulated
ENSG00000089022	ENSG00000089022.14	MAPKAPK5	111842228	111902222	1	mRNA	MAPK activated protein kinase 5 [Source:HGNC Symbol;Acc:HGNC:6889]	1061.58	-0.1889402	0.05907894	0.0008879463	0.005778734	1055	1180	1041	1230	845	827	865	896	954.3456	912.6202	986.5526	1235.5	842.9705	847.4019	906.2132	960.8842	Down Regulated
ENSG00000247373	ENSG00000247373.3	TMED2-DT	123575891	123585115	-1	lncRNA	TMED2 divergent transcript [Source:HGNC Symbol;Acc:HGNC:53346]	90.76207	-0.3954421	0.1422062	0.001161607	0.007182514	154	183	136	104	100	91	86	87	139.3073	141.5335	128.8868	104.465	99.75982	93.24495	90.0975	93.30014	Down Regulated
ENSG00000086598	ENSG00000086598.11	TMED2	123584533	123598582	1	mRNA	transmembrane p24 trafficking protein 2 [Source:HGNC Symbol;Acc:HGNC:16996]	5051.619	-0.4976771	0.07561134	7.94952e-12	7.954219e-10	4298	5309	3525	3361	2449	2431	2589	2486	3887.941	4106.018	3340.632	3376.028	2443.118	2490.972	2712.354	2666.025	Down Regulated
ENSG00000286092	ENSG00000286092.1		123713408	123723169	-1	lncRNA	novel transcript, antisense to ATP6V0A2	18.55782	-0.7998697	0.3987088	0.002257556	0.01223792	30	34	26	33	13	11	12	15	27.13779	26.29584	24.64012	33.14755	12.96878	11.27137	12.57174	16.08623	Down Regulated
ENSG00000185344	ENSG00000185344.14	ATP6V0A2	123712353	123761755	1	mRNA	ATPase H+ transporting V0 subunit a2 [Source:HGNC Symbol;Acc:HGNC:18481]	1081.689	-0.248553	0.07371552	0.0003584594	0.002834187	1104	1204	977	1058	792	812	809	737	998.6706	931.182	925.8999	1062.731	790.0978	832.0318	847.5451	790.3701	Down Regulated
ENSG00000279500	ENSG00000279500.1		128813186	128814750	-1	lncRNA	novel transcript	24.0881	-1.02291	0.3172681	7.15e-05	0.000764098	34	47	53	76	25	14	19	24	30.75616	36.35013	50.22794	76.33982	24.93996	14.34538	19.90526	25.73797	Down Regulated
ENSG00000139370	ENSG00000139370.12	SLC15A4	128793194	128823958	-1	mRNA	solute carrier family 15 member 4 [Source:HGNC Symbol;Acc:HGNC:23090]	550.4722	-0.1982239	0.0640399	0.001215389	0.007433598	592	814	521	627	545	453	451	467	535.519	629.5533	493.7501	629.8035	543.691	464.1754	472.4881	500.818	Down Regulated
ENSG00000250790	ENSG00000250790.4		132911470	132914732	1	lncRNA	novel transcript	25.51567	-0.5173172	0.236649	0.003309089	0.01657102	51	30	40	46	26	27	25	15	46.13424	23.20221	37.90788	46.20568	25.93755	27.66608	26.19113	16.08623	Down Regulated
ENSG00000196458	ENSG00000196458.11	ZNF605	132918306	132956306	-1	mRNA	zinc finger protein 605 [Source:HGNC Symbol;Acc:HGNC:28068]	992.1449	-0.1886314	0.08307008	0.01050226	0.04115799	923	1256	940	941	703	802	767	753	834.9393	971.3992	890.8352	945.2075	701.3115	821.7851	803.544	807.5288	Down Regulated
ENSG00000237637	ENSG00000237637.1	FRY-AS1	32025314	32031639	-1	lncRNA	FRY antisense RNA 1 [Source:HGNC Symbol;Acc:HGNC:39725]	37.50541	-0.5014384	0.2138068	0.002352721	0.01262242	72	110	78	87	43	55	48	50	65.13069	85.07477	73.92036	87.389	42.89672	56.35684	50.28698	53.62077	Down Regulated
ENSG00000073910	ENSG00000073910.21	FRY	31846713	32299125	1	mRNA	FRY microtubule binding protein [Source:HGNC Symbol;Acc:HGNC:20367]	5165.556	0.2866696	0.08502523	0.0002957883	0.002424557	8814	12520	10970	10163	11112	11029	11840	11781	7973.082	9683.055	10396.24	10208.44	11085.31	11301.08	12404.12	12634.13	Up Regulated
ENSG00000236581	ENSG00000236581.8	STARD13-AS	33180401	33281584	1	lncRNA	STARD13 antisense RNA [Source:HGNC Symbol;Acc:HGNC:40873]	1035.179	0.4305891	0.1634263	0.001485627	0.008680656	1138	1162	2065	1280	1764	1740	1777	1808	1029.427	898.6989	1956.994	1285.723	1759.763	1782.925	1861.666	1938.927	Up Regulated
ENSG00000133121	ENSG00000133121.21	STARD13	33103137	33350630	-1	mRNA	StAR related lipid transfer domain containing 13 [Source:HGNC Symbol;Acc:HGNC:19164]	2556.057	0.4391299	0.07495205	9.801127e-10	6.125553e-08	2182	2875	3228	1817	3120	3017	2959	2943	1973.822	2223.545	3059.166	1825.124	3112.506	3091.429	3099.983	3156.118	Up Regulated
ENSG00000277386	ENSG00000277386.1		33336216	33336716	-1	lncRNA	novel transcript, sense intronic to STARD13	72.76754	0.4600923	0.1820643	0.001755863	0.00994842	79	108	122	64	120	117	110	127	71.46284	83.52795	115.619	64.28616	119.7118	119.8864	115.241	136.1968	Up Regulated
ENSG00000133121	ENSG00000133121.21	STARD13	33103137	33350630	-1	mRNA	StAR related lipid transfer domain containing 13 [Source:HGNC Symbol;Acc:HGNC:19164]	2556.057	0.4391299	0.07495205	9.801127e-10	6.125553e-08	2182	2875	3228	1817	3120	3017	2959	2943	1973.822	2223.545	3059.166	1825.124	3112.506	3091.429	3099.983	3156.118	Up Regulated
ENSG00000280060	ENSG00000280060.1		43894725	43895182	-1	lncRNA	TEC	24.56008	1.031271	0.404147	0.000591556	0.00419434	9	3	8	8	14	5	20	20	8.141337	2.320221	7.581576	8.03577	13.96638	5.123349	20.95291	21.44831	Up Regulated
ENSG00000281883	ENSG00000281883.1		43883800	44028526	1	mRNA	novel transcript	28.56292	0.7063761	0.4474849	0.006047448	0.02672667	8	4	10	8	11	19	14	10	7.236744	3.093628	9.47697	8.03577	10.97358	19.46872	14.66704	10.72415	Up Regulated
ENSG00000280060	ENSG00000280060.1		43894725	43895182	-1	lncRNA	TEC	24.56008	1.031271	0.404147	0.000591556	0.00419434	9	3	8	8	14	5	20	20	8.141337	2.320221	7.581576	8.03577	13.96638	5.123349	20.95291	21.44831	Up Regulated
ENSG00000179630	ENSG00000179630.11	LACC1	43879284	43893932	1	mRNA	laccase domain containing 1 [Source:HGNC Symbol;Acc:HGNC:26789]	4043.988	0.3858061	0.1503871	0.002204648	0.01197989	803	760	1177	492	920	998	1023	924	726.3882	587.7893	1115.439	494.1999	917.7904	1022.62	1071.741	990.9118	Up Regulated
ENSG00000233672	ENSG00000233672.6	RNASEH2B-AS1	50862172	50910764	-1	lncRNA	RNASEH2B antisense RNA 1 [Source:HGNC Symbol;Acc:HGNC:39967]	222.8571	-0.4451986	0.165881	0.001195846	0.007327305	258	386	219	482	204	181	208	228	233.385	298.5351	207.5456	484.1552	203.51	185.4652	217.9102	244.5107	Down Regulated
ENSG00000136104	ENSG00000136104.20	RNASEH2B	50909747	51024120	1	mRNA	ribonuclease H2 subunit B [Source:HGNC Symbol;Acc:HGNC:25671]	2270.073	-0.2060864	0.06648945	0.001146813	0.007110519	4004	5564	3866	3788	3166	3208	3230	3177	3621.99	4303.236	3663.797	3804.937	3158.396	3287.14	3383.895	3407.064	Down Regulated
ENSG00000236778	ENSG00000236778.7	INTS6-AS1	51452364	51554678	1	lncRNA	INTS6 antisense RNA 1 [Source:HGNC Symbol;Acc:HGNC:42691]	267.2439	-0.3360295	0.09498403	0.000123723	0.00118655	332	361	239	300	214	219	205	194	300.3249	279.1999	226.4996	301.3414	213.486	224.4027	214.7673	208.0486	Down Regulated
ENSG00000224892	ENSG00000224892.6	RPS4XP16	51454164	51461315	1	mRNA	ribosomal protein S4X pseudogene 16 [Source:HGNC Symbol;Acc:HGNC:36365]	263.3967	-0.3091965	0.09076582	0.0002314766	0.001988897	232	301	248	219	189	190	157	153	209.8656	232.7955	235.0289	219.9792	188.5461	194.6872	164.4803	164.0796	Down Regulated
ENSG00000231856	ENSG00000231856.2		51803838	51813832	1	lncRNA	novel transcript	70.48664	1.182405	0.1938165	7.3e-11	6.13e-09	32	46	36	36	83	84	79	62	28.94697	35.57672	34.11709	36.16097	82.80065	86.07226	82.76398	66.48975	Up Regulated
ENSG00000102796	ENSG00000102796.11	DHRS12	51767993	51804163	-1	mRNA	dehydrogenase/reductase 12 [Source:HGNC Symbol;Acc:HGNC:25832]	170.8292	0.2614713	0.1134637	0.008788824	0.03582553	226	315	300	337	339	339	281	314	204.438	243.6232	284.3091	338.5068	338.1858	347.363	294.3883	336.7384	Up Regulated
ENSG00000282864	ENSG00000282864.1		91485793	91486870	1	lncRNA	TEC	42.91052	-0.4325748	0.2070528	0.00561909	0.02513986	133	113	69	83	51	57	56	71	120.3109	87.39499	65.39109	83.37112	50.87751	58.40617	58.66814	76.14149	Down Regulated
ENSG00000179399	ENSG00000179399.15	GPC5	91398621	92873682	1	mRNA	glypican 5 [Source:HGNC Symbol;Acc:HGNC:4453]	275.2575	-0.4301175	0.1419223	0.0004548852	0.003405687	738	673	299	287	280	331	331	273	667.5896	520.5029	283.3614	288.2833	279.3275	339.1657	346.7706	292.7694	Down Regulated
ENSG00000282865	ENSG00000282865.1		92239835	92241951	-1	lncRNA	TEC	46.71106	-0.6068248	0.2111931	0.000409717	0.003141625	106	100	46	77	44	40	49	41	95.88685	77.3407	43.59406	77.34429	43.89432	40.98679	51.33462	43.96903	Down Regulated
ENSG00000179399	ENSG00000179399.15	GPC5	91398621	92873682	1	mRNA	glypican 5 [Source:HGNC Symbol;Acc:HGNC:4453]	275.2575	-0.4301175	0.1419223	0.0004548852	0.003405687	738	673	299	287	280	331	331	273	667.5896	520.5029	283.3614	288.2833	279.3275	339.1657	346.7706	292.7694	Down Regulated
ENSG00000247400	ENSG00000247400.3	DNAJC3-DT	95648711	95676973	-1	lncRNA	DNAJC3 divergent transcript [Source:HGNC Symbol;Acc:HGNC:39808]	100.0725	-0.3794558	0.1583896	0.003601606	0.01771756	96	128	76	113	68	70	59	65	86.84092	98.99609	72.02497	113.5053	67.83668	71.72688	61.81108	69.707	Down Regulated
ENSG00000134874	ENSG00000134874.17	DZIP1	95578202	95644706	-1	mRNA	DAZ interacting zinc finger protein 1 [Source:HGNC Symbol;Acc:HGNC:20908]	123.9843	-0.667468	0.1613281	3.58173e-06	6.355703e-05	197	198	77	140	71	91	84	73	178.2048	153.1346	72.97267	140.626	70.82947	93.24495	88.00221	78.28632	Down Regulated
ENSG00000232684	ENSG00000232684.1	ATP11A-AS1	112745449	112754693	-1	lncRNA	ATP11A antisense RNA 1 [Source:HGNC Symbol;Acc:HGNC:40645]	27.43926	0.7537509	0.2312362	8.81e-05	0.000905466	35	43	35	40	62	59	49	72	31.66075	33.2565	33.16939	40.17885	61.85109	60.45551	51.33462	77.21391	Up Regulated
ENSG00000068650	ENSG00000068650.18	ATP11A	112690038	112887168	1	mRNA	ATPase phospholipid transporting 11A [Source:HGNC Symbol;Acc:HGNC:13552]	1911.132	0.3790289	0.1014593	4.705174e-05	0.000538431	1634	2612	2238	2322	2850	2353	2337	2673	1478.105	2020.139	2120.946	2332.382	2843.155	2411.048	2448.347	2866.566	Up Regulated
ENSG00000258450	ENSG00000258450.1		49629291	49629890	-1	lncRNA	novel transcript	24.626	0.514785	0.319906	0.009446449	0.03783049	38	21	27	31	58	39	39	37	34.37453	16.24155	25.58782	31.13861	57.8607	39.96212	40.85817	39.67937	Up Regulated
ENSG00000165506	ENSG00000165506.14	DNAAF2	49625174	49635244	-1	mRNA	dynein axonemal assembly factor 2 [Source:HGNC Symbol;Acc:HGNC:20188]	495.3664	0.3341856	0.1037662	0.000385223	0.002995828	447	460	451	513	542	587	507	484	404.3531	355.7672	427.4113	515.2938	540.6982	601.4811	531.1562	519.049	Up Regulated
ENSG00000258658	ENSG00000258658.1	TOMM20L-DT	58370023	58395641	-1	lncRNA	TOMM20L divergent transcript [Source:HGNC Symbol;Acc:HGNC:55443]	18.18159	0.7167172	0.3399841	0.002411077	0.01286753	13	22	27	17	34	36	39	22	11.75971	17.01495	25.58782	17.07601	33.91834	36.88811	40.85817	23.59314	Up Regulated
ENSG00000032219	ENSG00000032219.18	ARID4A	58298504	58373887	1	mRNA	AT-rich interaction domain 4A [Source:HGNC Symbol;Acc:HGNC:9885]	1708.647	0.2146271	0.08884375	0.008627123	0.03534371	1932	2136	2475	1768	2003	1967	2216	2367	1747.674	1651.997	2345.55	1775.905	1998.189	2015.525	2321.582	2538.407	Up Regulated
ENSG00000273797	ENSG00000273797.1		69617122	69617648	1	lncRNA	novel transcript, sense intronic to KIAA0247	45.10265	1.773114	0.2380009	5.18e-15	8.42e-13	11	33	38	41	91	95	107	91	9.950523	25.52243	36.01249	41.18332	90.78144	97.34362	112.0981	97.5898	Up Regulated
ENSG00000100647	ENSG00000100647.8	SUSD6	69611596	69715144	1	mRNA	sushi domain containing 6 [Source:HGNC Symbol;Acc:HGNC:19956]	2491.453	0.2922544	0.1123182	0.003335649	0.01667419	2659	2491	2284	1812	2662	2496	2448	2512	2405.313	1926.557	2164.54	1820.102	2655.606	2557.576	2564.636	2693.907	Up Regulated
ENSG00000259488	ENSG00000259488.2	DUT-AS1	48312353	48331856	-1	lncRNA	DUT antisense RNA 1 [Source:HGNC Symbol;Acc:HGNC:55420]	77.51645	-0.3685825	0.1404928	0.002059617	0.01135585	153	230	121	189	110	99	123	114	138.4027	177.8836	114.6713	189.8451	109.7358	101.4423	128.8604	122.2554	Down Regulated
ENSG00000128951	ENSG00000128951.14	DUT	48331011	48343373	1	mRNA	deoxyuridine triphosphatase [Source:HGNC Symbol;Acc:HGNC:3078]	754.4964	-0.4894354	0.1087156	1.11174e-06	2.412818e-05	1155	1528	985	1104	767	722	733	654	1044.805	1181.766	933.4815	1108.936	765.1578	739.8115	767.9241	701.3597	Down Regulated
ENSG00000259668	ENSG00000259668.5		51455268	51460582	1	lncRNA	novel transcript, antisense to DMXL2	94.84017	0.6522395	0.1957622	8.19e-05	0.000852368	62	67	85	57	84	93	90	127	56.08476	51.81827	80.55424	57.25486	83.79825	95.29428	94.28808	136.1968	Up Regulated
ENSG00000104093	ENSG00000104093.13	DMXL2	51447711	51622833	-1	mRNA	Dmx like 2 [Source:HGNC Symbol;Acc:HGNC:2938]	5535.821	0.5615193	0.1284359	1.622139e-06	3.29489e-05	3050	4391	4703	2107	4063	4712	4991	4892	2759.009	3396.03	4457.019	2116.421	4053.242	4828.244	5228.798	5246.256	Up Regulated
ENSG00000279145	ENSG00000279145.2		55171378	55176739	-1	lncRNA	TEC	118.7493	-0.4872911	0.1523014	0.00021147	0.001845427	93	144	114	128	84	70	68	63	84.12715	111.3706	108.0375	128.5723	83.79825	71.72688	71.23989	67.56217	Down Regulated
ENSG00000137876	ENSG00000137876.10	RSL24D1	55180806	55197049	-1	mRNA	ribosomal L24 domain containing 1 [Source:HGNC Symbol;Acc:HGNC:18479]	2049.46	-0.4084282	0.08716928	6.378983e-07	1.517212e-05	1142	1442	1215	1227	794	833	837	783	1033.045	1115.253	1151.452	1232.486	792.093	853.5499	876.8792	839.7013	Down Regulated
ENSG00000277245	ENSG00000277245.1		56447120	56447697	1	lncRNA	novel transcript, antisense to MNS1	35.12947	-0.78716	0.3071897	0.000667709	0.004599018	74	30	53	54	26	20	30	20	66.93988	23.20221	50.22794	54.24145	25.93755	20.49339	31.42936	21.44831	Down Regulated
ENSG00000151575	ENSG00000151575.14	TEX9	56243971	56445997	1	mRNA	testis expressed 9 [Source:HGNC Symbol;Acc:HGNC:29585]	679.8962	-0.4145405	0.1915957	0.004502446	0.02117473	823	373	506	430	316	362	323	302	744.48	288.4808	479.5347	431.9227	315.241	370.9304	338.3895	323.8694	Down Regulated
ENSG00000245975	ENSG00000245975.2	MINDY2-DT	58768072	58770974	-1	lncRNA	MINDY2 divergent transcript [Source:HGNC Symbol;Acc:HGNC:55889]	15.70737	-0.6156934	0.4172052	0.008344563	0.03434544	55	23	22	10	15	13	11	11	49.75261	17.78836	20.84933	10.04471	14.96397	13.32071	11.5241	11.79657	Down Regulated
ENSG00000128923	ENSG00000128923.11	MINDY2	58771192	58861900	1	mRNA	MINDY lysine 48 deubiquitinase 2 [Source:HGNC Symbol;Acc:HGNC:26954]	3796.659	-0.4644573	0.1113256	5.350559e-06	8.82864e-05	6751	5375	3808	3611	3046	2984	2971	2960	6106.907	4157.063	3608.83	3627.146	3038.684	3057.614	3112.554	3174.35	Down Regulated
ENSG00000225798	ENSG00000225798.1		58889967	58894082	1	lncRNA	novel transcript	19.47571	-1.148073	0.3985612	0.000213296	0.001857038	31	22	22	25	15	8	8	3	28.04238	17.01495	20.84933	25.11178	14.96397	8.197358	8.381163	3.217246	Down Regulated
ENSG00000137776	ENSG00000137776.17	SLTM	58879050	58933679	-1	mRNA	SAFB like transcription modulator [Source:HGNC Symbol;Acc:HGNC:20709]	3388.492	-0.2297685	0.06020488	7.260224e-05	0.000774119	3278	3676	3135	3266	2384	2479	2512	2480	2965.256	2843.044	2971.03	3280.603	2378.274	2540.156	2631.685	2659.59	Down Regulated
ENSG00000261296	ENSG00000261296.1		62274163	62278365	1	lncRNA	novel transcript	63.56534	1.655861	0.2989394	1.94e-09	1.15e-07	10	6	19	11	28	41	33	34	9.04593	4.640442	18.00624	11.04918	27.93275	42.01146	34.5723	36.46212	Up Regulated
ENSG00000260062	ENSG00000260062.3	GOLGA2P11	62253730	62270680	-1	mRNA	GOLGA2 pseudogene 11 [Source:HGNC Symbol;Acc:HGNC:26788]	52.6683	0.6716947	0.3599257	0.003773259	0.01841924	6	9	30	44	42	27	37	45	5.427558	6.960663	28.43091	44.19674	41.89913	27.66608	38.76288	48.25869	Up Regulated
ENSG00000259370	ENSG00000259370.2		62827675	62884034	-1	lncRNA	novel transcript, antisense to TLN2	48.47218	0.634029	0.2055571	0.00019703	0.001737007	72	64	95	48	120	102	84	99	65.13069	49.49805	90.03121	48.21462	119.7118	104.5163	88.00221	106.1691	Up Regulated
ENSG00000171914	ENSG00000171914.16	TLN2	62390526	62844631	1	mRNA	talin 2 [Source:HGNC Symbol;Acc:HGNC:15447]	1011.367	0.4764025	0.1071363	1.522204e-06	3.145372e-05	1545	1401	1778	1021	1947	1810	1653	1733	1397.596	1083.543	1685.005	1025.565	1942.324	1854.652	1731.758	1858.496	Up Regulated
ENSG00000260898	ENSG00000260898.5	ADPGK-AS1	72782835	72798199	1	lncRNA	ADPGK antisense RNA 1 [Source:HGNC Symbol;Acc:HGNC:44144]	226.1062	0.6423554	0.09296917	5.86e-13	7.13e-11	237	244	217	156	314	272	297	291	214.3885	188.7113	205.6502	156.6975	313.2458	278.7102	311.1507	312.0729	Up Regulated
ENSG00000159322	ENSG00000159322.17	ADPGK	72751294	72785846	-1	mRNA	ADP dependent glucokinase [Source:HGNC Symbol;Acc:HGNC:25250]	5672.552	0.1447222	0.04651472	0.001452027	0.008538964	4989	6329	5219	3926	4838	4956	4826	4999	4513.014	4894.893	4946.031	3943.554	4826.38	5078.263	5055.937	5361.005	Up Regulated
ENSG00000278600	ENSG00000278600.1		79920195	79922455	-1	lncRNA	novel transcript, sense intronic to ST20	398.5736	-0.4300559	0.1119625	2.45e-05	0.000315359	357	451	300	421	244	220	242	257	322.9397	348.8065	284.3091	422.8824	243.414	225.4273	253.5302	275.6108	Down Regulated
ENSG00000180953	ENSG00000180953.11	ST20	79898840	79923702	-1	mRNA	suppressor of tumorigenicity 20 [Source:HGNC Symbol;Acc:HGNC:33520]	237.1715	-0.4070173	0.1134773	7.281111e-05	0.0007751254	279	258	195	263	168	158	147	165	252.3814	199.539	184.8009	264.176	167.5965	161.8978	154.0039	176.9485	Down Regulated
ENSG00000252690	ENSG00000252690.3		82752884	82757208	1	lncRNA	TEC	23.51731	-1.565661	0.322443	6.93e-08	2.43e-06	19	54	40	47	8	12	11	12	17.18727	41.76398	37.90788	47.21015	7.980786	12.29604	11.5241	12.86898	Down Regulated
ENSG00000186628	ENSG00000186628.12	FSD2	82755362	82806070	-1	mRNA	fibronectin type III and SPRY domain containing 2 [Source:HGNC Symbol;Acc:HGNC:18024]	71.85203	-0.3611975	0.144089	0.002975216	0.01521465	98	111	96	97	77	66	59	59	88.65011	85.84817	90.97891	97.43372	76.81506	67.6282	61.81108	63.27251	Down Regulated
ENSG00000285667	ENSG00000285667.1		84717474	84746837	-1	lncRNA	novel transcript	37.83196	-0.7236933	0.1820529	6.5e-06	0.000104309	78	80	70	75	31	39	41	41	70.55825	61.87256	66.33879	75.33535	30.92554	39.96212	42.95346	43.96903	Down Regulated
ENSG00000140612	ENSG00000140612.14	SEC11A	84669538	84716460	-1	mRNA	SEC11 homolog A, signal peptidase complex subunit [Source:HGNC Symbol;Acc:HGNC:17718]	2352.698	-0.3304832	0.06664483	2.352195e-07	6.617421e-06	2347	2770	2160	1798	1601	1622	1544	1421	2123.08	2142.337	2047.025	1806.039	1597.155	1662.014	1617.564	1523.902	Down Regulated
ENSG00000259367	ENSG00000259367.1	AKAP13-AS1	85619623	85670948	-1	lncRNA	AKAP13 antisense RNA 1 [Source:HGNC Symbol;Acc:HGNC:55975]	39.16103	1.188626	0.2962163	3.67e-06	6.44e-05	6	24	22	14	28	39	34	41	5.427558	18.56177	20.84933	14.0626	27.93275	39.96212	35.61994	43.96903	Up Regulated
ENSG00000170776	ENSG00000170776.21	AKAP13	85380571	85749358	1	mRNA	A-kinase anchoring protein 13 [Source:HGNC Symbol;Acc:HGNC:371]	4522.875	0.2018712	0.05278944	8.126902e-05	0.0008478359	3542	4625	4023	3339	3926	3914	3900	3849	3204.068	3577.007	3812.585	3353.93	3916.571	4010.557	4085.817	4127.727	Up Regulated
ENSG00000259276	ENSG00000259276.1		85621264	85627689	-1	lncRNA	novel transcript, antisense to AKAP13	72.30332	0.5772042	0.1914975	0.000279863	0.002324034	41	55	80	83	90	84	90	98	37.08831	42.53738	75.81576	83.37112	89.78384	86.07226	94.28808	105.0967	Up Regulated
ENSG00000170776	ENSG00000170776.21	AKAP13	85380571	85749358	1	mRNA	A-kinase anchoring protein 13 [Source:HGNC Symbol;Acc:HGNC:371]	4522.875	0.2018712	0.05278944	8.126902e-05	0.0008478359	3542	4625	4023	3339	3926	3914	3900	3849	3204.068	3577.007	3812.585	3353.93	3916.571	4010.557	4085.817	4127.727	Up Regulated
ENSG00000274215	ENSG00000274215.1		92808451	92809057	1	lncRNA	novel transcript	11.6167	3.225826	0.6876408	3.9e-07	1.01e-05	3	0	2	1	11	20	16	13	2.713779	0	1.895394	1.004471	10.97358	20.49339	16.76233	13.9414	Up Regulated
ENSG00000185442	ENSG00000185442.13	FAM174B	92617448	92809884	-1	mRNA	family with sequence similarity 174 member B [Source:HGNC Symbol;Acc:HGNC:34339]	84.93612	0.4769331	0.163383	0.0005364882	0.003882133	81	87	54	79	88	109	90	96	73.27203	67.28641	51.17564	79.35323	87.78864	111.689	94.28808	102.9519	Up Regulated
ENSG00000279356	ENSG00000279356.1		50072862	50074986	1	lncRNA	novel transcript	30.39475	-0.6451588	0.3227079	0.003245824	0.01630296	37	52	48	48	18	20	18	33	33.46994	40.21716	45.48945	48.21462	17.95677	20.49339	18.85762	35.38971	Down Regulated
ENSG00000155393	ENSG00000155393.13	HEATR3	50065967	50107272	1	mRNA	HEAT repeat containing 3 [Source:HGNC Symbol;Acc:HGNC:26087]	987.7188	-0.2531642	0.07652865	0.0004391262	0.003310888	702	936	824	807	631	613	583	536	635.0243	723.9089	780.9023	810.6083	629.4845	628.1225	610.7773	574.8146	Down Regulated
ENSG00000261644	ENSG00000261644.2	CYLD-AS1	50727417	50742815	-1	lncRNA	CYLD antisense RNA 1 [Source:HGNC Symbol;Acc:HGNC:55352]	50.87183	0.7630379	0.1798349	1.99e-06	3.92e-05	43	52	46	25	66	68	67	55	38.8975	40.21716	43.59406	25.11178	65.84148	69.67754	70.19224	58.98285	Up Regulated
ENSG00000083799	ENSG00000083799.17	CYLD	50742050	50801935	1	mRNA	CYLD lysine 63 deubiquitinase [Source:HGNC Symbol;Acc:HGNC:2584]	2104.549	0.3338047	0.09517999	0.0001402195	0.001315841	1441	1825	1746	1267	1647	1680	1905	1767	1303.518	1411.468	1654.679	1272.665	1643.044	1721.445	1995.764	1894.958	Up Regulated
ENSG00000260616	ENSG00000260616.6		50783859	50803338	-1	lncRNA	novel transcript, antisense to CYLD	13.29731	0.6551074	0.4629007	0.008053702	0.03347387	10	11	10	14	9	28	19	23	9.04593	8.507477	9.47697	14.0626	8.978384	28.69075	19.90526	24.66555	Up Regulated
ENSG00000083799	ENSG00000083799.17	CYLD	50742050	50801935	1	mRNA	CYLD lysine 63 deubiquitinase [Source:HGNC Symbol;Acc:HGNC:2584]	2104.549	0.3338047	0.09517999	0.0001402195	0.001315841	1441	1825	1746	1267	1647	1680	1905	1767	1303.518	1411.468	1654.679	1272.665	1643.044	1721.445	1995.764	1894.958	Up Regulated
ENSG00000260135	ENSG00000260135.6	MMP2-AS1	55426797	55462297	-1	lncRNA	MMP2 antisense RNA 1 [Source:HGNC Symbol;Acc:HGNC:53142]	39.45533	2.212712	0.4386439	2.64e-08	1.08e-06	5	7	4	11	21	26	40	35	4.522965	5.413849	3.790788	11.04918	20.94956	26.64141	41.90581	37.53454	Up Regulated
ENSG00000087245	ENSG00000087245.13	MMP2	55389700	55506691	1	mRNA	matrix metallopeptidase 2 [Source:HGNC Symbol;Acc:HGNC:7166]	1720.829	0.4279975	0.1582447	0.001231329	0.007500819	852	1151	1107	613	1208	1099	1172	1068	770.7132	890.1914	1049.101	615.7409	1205.099	1126.112	1227.84	1145.34	Up Regulated
ENSG00000261270	ENSG00000261270.1		56940278	56941342	1	lncRNA	novel transcript, sense intronic to HERPUD1	37.45515	-0.4802523	0.2282066	0.004584251	0.02147349	43	53	35	42	23	21	23	31	38.8975	40.99057	33.16939	42.18779	22.94476	21.51806	24.09584	33.24488	Down Regulated
ENSG00000051108	ENSG00000051108.15	HERPUD1	56932142	56944864	1	mRNA	homocysteine inducible ER protein with ubiquitin like domain 1 [Source:HGNC Symbol;Acc:HGNC:13744]	1965.459	-0.1690163	0.04861082	0.0003606693	0.002849442	1548	1904	1415	1444	1315	1245	1179	1116	1400.31	1472.567	1340.991	1450.457	1311.842	1275.714	1235.174	1196.816	Down Regulated
ENSG00000277978	ENSG00000277978.1		66565620	66566001	-1	lncRNA	novel transcript, antisense to CKLF	17.63967	-0.8981152	0.4324561	0.002391279	0.01278874	14	11	17	22	6	6	6	7	12.6643	8.507477	16.11085	22.09837	5.985589	6.148018	6.285872	7.506908	Down Regulated
ENSG00000217555	ENSG00000217555.12	CKLF	66552563	66566251	1	mRNA	chemokine like factor [Source:HGNC Symbol;Acc:HGNC:13253]	19.57646	-0.59587	0.4101614	0.008976638	0.03639391	9	23	41	37	17	16	11	8	8.141337	17.78836	38.85558	37.16544	16.95917	16.39472	11.5241	8.579323	Down Regulated
ENSG00000279412	ENSG00000279412.1		70713987	70716890	1	lncRNA	novel transcript	280.4752	0.463551	0.1548339	0.000443775	0.003340981	179	243	291	232	337	273	258	328	161.9221	187.9379	275.7798	233.0373	336.1906	279.7348	270.2925	351.7522	Up Regulated
ENSG00000103043	ENSG00000103043.15	VAC14	70687439	70801160	-1	mRNA	VAC14 component of PIKFYVE complex [Source:HGNC Symbol;Acc:HGNC:25507]	2502.863	0.4696948	0.1556896	0.0004037981	0.003102448	1253	1545	1576	1185	1846	1755	1698	1728	1133.455	1194.914	1493.57	1190.298	1841.566	1798.295	1778.902	1853.134	Up Regulated
ENSG00000214353	ENSG00000214353.7	VAC14-AS1	70755035	70773251	1	lncRNA	VAC14 antisense RNA 1 [Source:HGNC Symbol;Acc:HGNC:48605]	112.7269	0.3743715	0.1602803	0.003066408	0.01557023	53	71	83	72	103	70	63	101	47.94343	54.9119	78.65885	72.32193	102.7526	71.72688	66.00166	108.314	Up Regulated
ENSG00000103043	ENSG00000103043.15	VAC14	70687439	70801160	-1	mRNA	VAC14 component of PIKFYVE complex [Source:HGNC Symbol;Acc:HGNC:25507]	2502.863	0.4696948	0.1556896	0.0004037981	0.003102448	1253	1545	1576	1185	1846	1755	1698	1728	1133.455	1194.914	1493.57	1190.298	1841.566	1798.295	1778.902	1853.134	Up Regulated
ENSG00000259972	ENSG00000259972.2		74305127	74335346	-1	lncRNA	novel transcript, antisense to PSMD7	222.3201	0.3084451	0.09328428	0.000328742	0.002647666	205	258	237	217	252	254	224	277	185.4416	199.539	224.6042	217.9703	251.3948	260.2661	234.6726	297.0591	Up Regulated
ENSG00000103035	ENSG00000103035.11	PSMD7	74296814	74306288	1	mRNA	proteasome 26S subunit, non-ATPase 7 [Source:HGNC Symbol;Acc:HGNC:9565]	739.4481	-0.1958257	0.07574667	0.005771281	0.02570188	499	698	562	482	411	462	387	416	451.3919	539.8381	532.6057	484.1552	410.0129	473.3974	405.4388	446.1248	Down Regulated
ENSG00000260213	ENSG00000260213.6	CENPN-AS1	81016792	81035759	-1	lncRNA	CENPN antisense RNA 1 [Source:HGNC Symbol;Acc:HGNC:55106]	26.06979	0.556133	0.2239089	0.001375106	0.008190951	26	28	45	47	44	49	58	54	23.51942	21.6554	42.64636	47.21015	43.89432	50.20882	60.76343	57.91043	Up Regulated
ENSG00000166454	ENSG00000166454.10	ATMIN	81035842	81047350	1	mRNA	ATM interactor [Source:HGNC Symbol;Acc:HGNC:29034]	2107.995	-0.2345568	0.05969794	4.498579e-05	0.0005188821	1850	1914	1539	1325	1241	1265	1228	1117	1673.497	1480.301	1458.506	1330.924	1238.019	1296.207	1286.509	1197.888	Down Regulated
ENSG00000285163	ENSG00000285163.1		85924984	85948824	1	lncRNA	novel transcript	60.58097	-0.8089824	0.366482	0.001451713	0.008538964	57	190	62	282	60	69	67	58	51.5618	146.9473	58.75721	283.2609	59.85589	70.70221	70.19224	62.20009	Down Regulated
ENSG00000140968	ENSG00000140968.11	IRF8	85899116	85922606	1	mRNA	interferon regulatory factor 8 [Source:HGNC Symbol;Acc:HGNC:5358]	3329.346	-0.3352217	0.1739349	0.01310734	0.04882488	4204	9552	4006	6069	3620	3846	3995	3668	3802.909	7387.583	3796.474	6096.136	3611.306	3940.88	4185.343	3933.62	Down Regulated
ENSG00000263050	ENSG00000263050.1	DPH1-AS1	2043475	2044968	-1	lncRNA	DPH1 antisense RNA 1 [Source:HGNC Symbol;Acc:HGNC:56040]	57.29673	1.858386	0.266567	1.63e-13	2.17e-11	20	19	37	29	92	91	86	84	18.09186	14.69473	35.06479	29.12967	91.77904	93.24495	90.0975	90.08289	Up Regulated
ENSG00000108963	ENSG00000108963.17	DPH1	2030137	2043898	1	mRNA	diphthamide biosynthesis 1 [Source:HGNC Symbol;Acc:HGNC:3003]	185.2866	0.6525028	0.1625178	6.050544e-06	9.812222e-05	132	153	132	145	238	206	165	197	119.4063	118.3313	125.096	145.6483	237.4284	211.082	172.8615	211.2658	Up Regulated
ENSG00000266389	ENSG00000266389.1	PIK3R5-DT	8965896	8967070	1	lncRNA	PIK3R5 divergent transcript [Source:HGNC Symbol;Acc:HGNC:55321]	23.38074	0.4701551	0.3096093	0.01311523	0.04884424	23	18	23	11	26	26	33	21	20.80564	13.92133	21.79703	11.04918	25.93755	26.64141	34.5723	22.52072	Up Regulated
ENSG00000141506	ENSG00000141506.13	PIK3R5	8878911	8965712	-1	mRNA	phosphoinositide-3-kinase regulatory subunit 5 [Source:HGNC Symbol;Acc:HGNC:30035]	914.5591	0.423627	0.1298647	0.0002177311	0.001885954	384	536	491	427	574	580	516	551	347.3637	414.5461	465.3192	428.9092	572.6214	594.3084	540.585	590.9009	Up Regulated
ENSG00000266709	ENSG00000266709.1		14303854	14305505	1	lncRNA	novel transcript	54.22144	0.8093535	0.3043496	0.000498804	0.003665598	20	48	41	37	56	56	64	73	18.09186	37.12353	38.85558	37.16544	55.8655	57.3815	67.0493	78.28632	Up Regulated
ENSG00000125430	ENSG00000125430.9	HS3ST3B1	14301081	14349404	1	mRNA	heparan sulfate-glucosamine 3-sulfotransferase 3B1 [Source:HGNC Symbol;Acc:HGNC:5198]	391.6451	0.3718533	0.1826557	0.008603948	0.03528435	278	328	303	228	372	339	334	324	251.4768	253.6775	287.1522	229.0195	371.1065	347.363	349.9136	347.4626	Up Regulated
ENSG00000266378	ENSG00000266378.1		14327335	14329474	1	lncRNA	novel transcript	13.8252	0.6630237	0.4853605	0.008447002	0.03470378	11	15	11	6	15	21	16	24	9.950523	11.6011	10.42467	6.026828	14.96397	21.51806	16.76233	25.73797	Up Regulated
ENSG00000125430	ENSG00000125430.9	HS3ST3B1	14301081	14349404	1	mRNA	heparan sulfate-glucosamine 3-sulfotransferase 3B1 [Source:HGNC Symbol;Acc:HGNC:5198]	391.6451	0.3718533	0.1826557	0.008603948	0.03528435	278	328	303	228	372	339	334	324	251.4768	253.6775	287.1522	229.0195	371.1065	347.363	349.9136	347.4626	Up Regulated
ENSG00000175061	ENSG00000175061.17	SNHG29	16438767	16480249	1	lncRNA	small nucleolar RNA host gene 29 [Source:HGNC Symbol;Acc:HGNC:28619]	1461.598	-0.3525165	0.07118704	2.19e-07	6.28e-06	1531	2122	1568	1593	1252	1181	1135	1016	1384.932	1641.17	1485.989	1600.123	1248.993	1210.135	1189.077	1089.574	Down Regulated
ENSG00000181350	ENSG00000181350.11	LRRC75A	16441577	16492193	-1	mRNA	leucine rich repeat containing 75A [Source:HGNC Symbol;Acc:HGNC:32403]	84.47354	-0.407077	0.1821652	0.004087598	0.01965608	82	107	96	158	45	87	76	66	74.17662	82.75455	90.97891	158.7065	44.89192	89.14627	79.62105	70.77942	Down Regulated
ENSG00000263370	ENSG00000263370.1		29639627	29640825	1	lncRNA	novel transcript, antisense to SSH2	17.50266	0.586562	0.292845	0.003799538	0.0185297	8	28	36	28	31	28	47	43	7.236744	21.6554	34.11709	28.1252	30.92554	28.69075	49.23933	46.11386	Up Regulated
ENSG00000141298	ENSG00000141298.19	SSH2	29625938	29930276	-1	mRNA	slingshot protein phosphatase 2 [Source:HGNC Symbol;Acc:HGNC:30580]	2965.86	0.2900521	0.05398235	3.184388e-08	1.275765e-06	3691	5697	4600	3996	4777	4728	4784	4871	3338.853	4406.1	4359.406	4013.867	4765.527	4844.638	5011.935	5223.735	Up Regulated
ENSG00000286194	ENSG00000286194.1		30968785	30970307	1	lncRNA	Novel transcript	82.97308	0.4989266	0.1751705	0.000621	0.004340591	42	66	70	26	66	65	62	71	37.9929	51.04486	66.33879	26.11625	65.84148	66.60353	64.95401	76.14149	Up Regulated
ENSG00000181481	ENSG00000181481.14	RNF135	30970984	30999911	1	mRNA	ring finger protein 135 [Source:HGNC Symbol;Acc:HGNC:21158]	1324.766	0.2402597	0.07862808	0.001120957	0.00696509	1157	1262	1126	657	1129	1120	1090	1006	1046.614	976.0396	1067.107	659.9376	1126.288	1147.63	1141.933	1078.85	Up Regulated
ENSG00000267745	ENSG00000267745.1		35406684	35409768	-1	lncRNA	novel transcript	21.61136	-0.7613052	0.3335086	0.001499992	0.00875261	40	52	20	14	12	14	15	14	36.18372	40.21716	18.95394	14.0626	11.97118	14.34538	15.71468	15.01382	Down Regulated
ENSG00000172123	ENSG00000172123.12	SLFN12	35410922	35433283	-1	mRNA	schlafen family member 12 [Source:HGNC Symbol;Acc:HGNC:25500]	284.4331	-0.5045729	0.1166625	2.413565e-06	4.590293e-05	442	477	298	237	238	199	206	216	399.8301	368.9151	282.4137	238.0597	237.4284	203.9093	215.8149	231.6417	Down Regulated
ENSG00000267632	ENSG00000267632.1		42509784	42511519	1	lncRNA	novel transcript	167.2243	0.3297377	0.1113765	0.001013418	0.006426643	176	209	195	177	197	192	202	257	159.2084	161.6421	184.8009	177.7914	196.5268	196.7366	211.6244	275.6108	Up Regulated
ENSG00000033627	ENSG00000033627.16	ATP6V0A1	42458844	42522582	1	mRNA	ATPase H+ transporting V0 subunit a1 [Source:HGNC Symbol;Acc:HGNC:865]	3237.257	0.1538343	0.04528107	0.0005148781	0.003763297	3822	4704	3579	3422	3929	3751	3649	3704	3457.354	3638.106	3391.807	3437.301	3919.563	3843.536	3822.858	3972.227	Up Regulated
ENSG00000264895	ENSG00000264895.1		51249579	51251748	-1	lncRNA	novel transcript, sense intronic to MBTD1	47.82327	-0.7019748	0.1841864	7.76e-06	0.000121159	79	118	79	72	46	33	46	48	71.46284	91.26202	74.86806	72.32193	45.88952	33.8141	48.19169	51.47594	Down Regulated
ENSG00000011258	ENSG00000011258.16	MBTD1	51177425	51260163	-1	mRNA	mbt domain containing 1 [Source:HGNC Symbol;Acc:HGNC:19866]	715.698	-0.3347278	0.0937668	0.0001096799	0.00108036	926	1293	829	1034	728	619	681	725	837.6531	1000.015	785.6408	1038.623	726.2515	634.2706	713.4465	777.5012	Down Regulated
ENSG00000279059	ENSG00000279059.1		54956760	54958426	-1	lncRNA	TEC	49.84835	-0.3519543	0.1819375	0.01194339	0.04548925	79	70	74	58	43	48	49	39	71.46284	54.13849	70.12958	58.25934	42.89672	49.18415	51.33462	41.8242	Down Regulated
ENSG00000166260	ENSG00000166260.11	COX11	54951902	54968703	-1	mRNA	cytochrome c oxidase copper chaperone COX11 [Source:HGNC Symbol;Acc:HGNC:2261]	429.9375	-0.2345663	0.08359943	0.002533554	0.01337706	348	357	306	300	241	257	238	220	314.7984	276.1063	289.9953	301.3414	240.4212	263.3401	249.3396	235.9314	Down Regulated
ENSG00000279059	ENSG00000279059.1		54956760	54958426	-1	lncRNA	TEC	49.84835	-0.3519543	0.1819375	0.01194339	0.04548925	79	70	74	58	43	48	49	39	71.46284	54.13849	70.12958	58.25934	42.89672	49.18415	51.33462	41.8242	Down Regulated
ENSG00000141198	ENSG00000141198.16	TOM1L1	54899387	54961956	1	mRNA	target of myb1 like 1 membrane trafficking protein [Source:HGNC Symbol;Acc:HGNC:11983]	56.26372	-0.5318787	0.1906844	0.0007283286	0.004929627	68	65	39	46	28	39	29	27	61.51232	50.27145	36.96018	46.20568	27.93275	39.96212	30.38172	28.95522	Down Regulated
ENSG00000265415	ENSG00000265415.1	PRR11-AS1	59202677	59203829	-1	lncRNA	PRR11 antisense RNA 1 [Source:HGNC Symbol;Acc:HGNC:56242]	98.21362	-0.3778107	0.2053482	0.01222239	0.04634331	276	339	157	90	129	133	135	118	249.6677	262.185	148.7884	90.40242	128.6902	136.2811	141.4321	126.545	Down Regulated
ENSG00000068489	ENSG00000068489.12	PRR11	59155732	59206709	1	mRNA	proline rich 11 [Source:HGNC Symbol;Acc:HGNC:25619]	802.1602	-0.3517026	0.1628578	0.007244844	0.03072818	2056	2684	1430	699	1067	1128	1119	981	1859.843	2075.824	1355.207	702.1254	1064.437	1155.827	1172.315	1052.039	Down Regulated
ENSG00000279570	ENSG00000279570.1		78691266	78691979	-1	lncRNA	TEC	51.07779	0.4727021	0.2119358	0.004250842	0.02025407	43	50	65	83	73	79	71	94	38.8975	38.67035	61.6003	83.37112	72.82467	80.94891	74.38282	100.807	Up Regulated
ENSG00000108669	ENSG00000108669.16	CYTH1	78674048	78782297	-1	mRNA	cytohesin 1 [Source:HGNC Symbol;Acc:HGNC:9501]	2033.884	0.3389636	0.0919221	6.89242e-05	0.0007412921	1718	1950	1912	1807	2246	2136	1874	2073	1554.091	1508.144	1811.997	1815.08	2240.606	2188.695	1963.287	2223.117	Up Regulated
ENSG00000263069	ENSG00000263069.5	RNF213-AS1	80351828	80415168	-1	lncRNA	RNF213 antisense RNA 1 [Source:HGNC Symbol;Acc:HGNC:54402]	90.0971	0.7528005	0.2270113	7.14e-05	0.000764098	111	114	133	72	177	180	117	203	100.4098	88.1684	126.0437	72.32193	176.5749	184.4406	122.5745	217.7003	Up Regulated
ENSG00000173821	ENSG00000173821.19	RNF213	80260852	80398794	1	mRNA	ring finger protein 213 [Source:HGNC Symbol;Acc:HGNC:14539]	13226.92	0.4225063	0.1351328	0.0003480198	0.002769976	21246	23004	18082	8691	21269	20720	19260	23136	19218.98	17791.45	17136.26	8729.86	21217.92	21231.16	20177.65	24811.4	Up Regulated
ENSG00000267249	ENSG00000267249.1		12670426	12671145	-1	lncRNA	novel transcript, sense intronic CEP76	20.56767	-0.4858189	0.3158753	0.01203179	0.04581418	34	31	33	25	9	24	19	13	30.75616	23.97562	31.274	25.11178	8.978384	24.59207	19.90526	13.9414	Down Regulated
ENSG00000101624	ENSG00000101624.10	CEP76	12661833	12702777	-1	mRNA	centrosomal protein 76 [Source:HGNC Symbol;Acc:HGNC:25727]	233.6426	-0.3842849	0.1168692	0.0002402667	0.002050545	286	395	276	221	199	199	199	160	258.7136	305.4958	261.5644	221.9882	198.522	203.9093	208.4814	171.5865	Down Regulated
ENSG00000267249	ENSG00000267249.1		12670426	12671145	-1	lncRNA	novel transcript, sense intronic CEP76	20.56767	-0.4858189	0.3158753	0.01203179	0.04581418	34	31	33	25	9	24	19	13	30.75616	23.97562	31.274	25.11178	8.978384	24.59207	19.90526	13.9414	Down Regulated
ENSG00000128789	ENSG00000128789.21	PSMG2	12658043	12728945	1	mRNA	proteasome assembly chaperone 2 [Source:HGNC Symbol;Acc:HGNC:24929]	845.1152	-0.2844111	0.06350195	3.109492e-06	5.644326e-05	1000	1151	876	834	697	694	710	626	904.593	890.1914	830.1826	837.7291	695.326	711.1208	743.8282	671.332	Down Regulated
ENSG00000263393	ENSG00000263393.1		32122400	32124478	-1	lncRNA	novel transcript, antisense to RNF138	40.26793	-0.4561274	0.2277446	0.006036904	0.02669168	52	69	86	74	41	27	41	54	47.03883	53.36508	81.50194	74.33088	40.90153	27.66608	42.95346	57.91043	Down Regulated
ENSG00000141441	ENSG00000141441.16	GAREM1	32124877	32470882	-1	mRNA	GRB2 associated regulator of MAPK1 subtype 1 [Source:HGNC Symbol;Acc:HGNC:26136]	744.9458	-0.5038665	0.1336341	2.289061e-05	0.0002973207	978	568	571	788	478	472	413	386	884.6919	439.2952	541.135	791.5234	476.8519	483.6441	432.6775	413.9523	Down Regulated
ENSG00000263393	ENSG00000263393.1		32122400	32124478	-1	lncRNA	novel transcript, antisense to RNF138	40.26793	-0.4561274	0.2277446	0.006036904	0.02669168	52	69	86	74	41	27	41	54	47.03883	53.36508	81.50194	74.33088	40.90153	27.66608	42.95346	57.91043	Down Regulated
ENSG00000134758	ENSG00000134758.14	RNF138	32091874	32131561	1	mRNA	ring finger protein 138 [Source:HGNC Symbol;Acc:HGNC:17765]	1235.067	-0.3689491	0.09719182	3.848537e-05	0.0004579466	1465	1839	1245	1522	936	919	1059	1081	1325.229	1422.295	1179.883	1528.805	933.7519	941.6715	1109.456	1159.281	Down Regulated
ENSG00000263982	ENSG00000263982.1		76372717	76378275	1	lncRNA	novel transcript, antisense to ZFN156	32.19299	0.4047154	0.2048491	0.008262197	0.03411011	31	70	60	50	71	57	62	73	28.04238	54.13849	56.86182	50.22357	70.82947	58.40617	64.95401	78.28632	Up Regulated
ENSG00000101493	ENSG00000101493.11	ZNF516	76357682	76495242	-1	mRNA	zinc finger protein 516 [Source:HGNC Symbol;Acc:HGNC:28990]	3364.487	0.4386463	0.09848997	1.702953e-06	3.428185e-05	3168	4818	3980	3492	4809	4494	4543	4680	2865.751	3726.275	3771.834	3507.614	4797.45	4604.866	4759.453	5018.904	Up Regulated
ENSG00000280205	ENSG00000280205.1		76385642	76389406	-1	lncRNA	TEC	72.94199	0.6598795	0.2432971	0.000566098	0.004044524	89	185	124	155	206	158	161	300	80.50877	143.0803	117.5144	155.6931	205.5052	161.8978	168.6709	321.7246	Up Regulated
ENSG00000101493	ENSG00000101493.11	ZNF516	76357682	76495242	-1	mRNA	zinc finger protein 516 [Source:HGNC Symbol;Acc:HGNC:28990]	3364.487	0.4386463	0.09848997	1.702953e-06	3.428185e-05	3168	4818	3980	3492	4809	4494	4543	4680	2865.751	3726.275	3771.834	3507.614	4797.45	4604.866	4759.453	5018.904	Up Regulated
ENSG00000279077	ENSG00000279077.1		79352458	79354567	1	lncRNA	TEC	60.96268	0.5205788	0.181972	0.000535857	0.003881714	62	48	109	66	98	81	90	113	56.08476	37.12353	103.299	66.29511	97.76463	82.99825	94.28808	121.1829	Up Regulated
ENSG00000166377	ENSG00000166377.20	ATP9B	79069285	79378287	1	mRNA	ATPase phospholipid transporting 9B (putative) [Source:HGNC Symbol;Acc:HGNC:13541]	1368.335	0.201071	0.05372449	0.0001127116	0.001101202	1316	1536	1548	1207	1490	1402	1370	1387	1190.444	1187.953	1467.035	1212.397	1486.421	1436.587	1435.274	1487.44	Up Regulated
ENSG00000267607	ENSG00000267607.1	ICAM4-AS1	10285801	10289019	-1	lncRNA	ICAM4 antisense RNA 1 [Source:HGNC Symbol;Acc:HGNC:55990]	19.9443	2.792739	0.8470808	0.000106892	0.001057568	1	0	1	2	4	10	13	7	0.904593	0	0.947697	2.008943	3.990393	10.2467	13.61939	7.506908	Up Regulated
ENSG00000090339	ENSG00000090339.9	ICAM1	10271093	10286615	1	mRNA	intercellular adhesion molecule 1 [Source:HGNC Symbol;Acc:HGNC:5344]	3301.38	1.427435	0.2472931	4.209778e-10	2.918397e-08	367	306	321	412	790	904	946	883	331.9856	236.6625	304.2107	413.8422	788.1026	926.3014	991.0725	946.9428	Up Regulated
ENSG00000278897	ENSG00000278897.1		11856032	11858302	1	lncRNA	TEC	87.01084	-0.3610432	0.138207	0.001980686	0.01101032	200	300	150	168	119	125	130	149	180.9186	232.0221	142.1545	168.7512	118.7142	128.0837	136.1939	159.7899	Down Regulated
ENSG00000171291	ENSG00000171291.8	ZNF439	11848726	11883750	1	mRNA	zinc finger protein 439 [Source:HGNC Symbol;Acc:HGNC:20873]	277.1867	-0.429717	0.1144503	3.472005e-05	0.0004212865	579	813	405	459	309	368	365	355	523.7593	628.7799	383.8173	461.0523	308.2578	377.0785	382.3906	380.7075	Down Regulated
ENSG00000269243	ENSG00000269243.1		16123661	16139892	-1	lncRNA	novel transcript, antisense RAB8A	88.71684	-0.8264974	0.2831284	0.000220609	0.001906001	119	309	130	532	145	106	129	114	107.6466	238.9828	123.2006	534.3787	144.6517	108.615	135.1463	122.2554	Down Regulated
ENSG00000196684	ENSG00000196684.12	HSH2D	16134028	16158575	1	mRNA	hematopoietic SH2 domain containing [Source:HGNC Symbol;Acc:HGNC:24920]	17.39773	-1.107046	0.5209479	0.001294522	0.007805694	18	33	10	93	10	19	10	12	16.28267	25.52243	9.47697	93.41583	9.975982	19.46872	10.47645	12.86898	Down Regulated
ENSG00000269044	ENSG00000269044.2		16633797	16635269	-1	lncRNA	novel transcript, sense intronic C19orf42	100.5037	-0.3728027	0.1355795	0.001424365	0.008405079	93	131	139	89	72	78	74	68	84.12715	101.3163	131.7299	89.39795	71.82707	79.92424	77.52576	72.92425	Down Regulated
ENSG00000214046	ENSG00000214046.8	SMIM7	16630751	16660442	-1	mRNA	small integral membrane protein 7 [Source:HGNC Symbol;Acc:HGNC:28419]	856.5032	-0.3335978	0.06289534	3.723258e-08	1.457164e-06	766	1051	768	821	539	615	566	605	692.9182	812.8507	727.8313	824.6709	537.7054	630.1719	592.9673	648.8113	Down Regulated
ENSG00000280061	ENSG00000280061.1		30553956	30558058	1	lncRNA	TEC	51.85246	-0.9584606	0.2343475	3.03e-06	5.52e-05	66	85	51	62	26	24	27	33	59.70314	65.73959	48.33255	62.27722	25.93755	24.59207	28.28642	35.38971	Down Regulated
ENSG00000198597	ENSG00000198597.9	ZNF536	30224891	30713586	1	mRNA	zinc finger protein 536 [Source:HGNC Symbol;Acc:HGNC:29025]	202.9898	-0.6293298	0.1860857	7.885874e-05	0.0008248088	68	89	36	53	33	30	40	27	61.51232	68.83322	34.11709	53.23698	32.92074	30.74009	41.90581	28.95522	Down Regulated
ENSG00000280106	ENSG00000280106.1		34949038	34951205	-1	lncRNA	TEC	34.23261	-0.4660347	0.225171	0.005256965	0.02388803	36	57	38	37	19	26	22	29	32.56535	44.0842	36.01249	37.16544	18.95437	26.64141	23.0482	31.10005	Down Regulated
ENSG00000168661	ENSG00000168661.14	ZNF30	34926903	34945170	1	mRNA	zinc finger protein 30 [Source:HGNC Symbol;Acc:HGNC:13090]	30.84399	-1.11886	0.4992028	0.001485951	0.008680656	14	14	8	11	4	6	1	4	12.6643	10.8277	7.581576	11.04918	3.990393	6.148018	1.047645	4.289662	Down Regulated
ENSG00000268001	ENSG00000268001.1	CARD8-AS1	48255675	48258199	1	lncRNA	CARD8 antisense RNA 1 [Source:HGNC Symbol;Acc:HGNC:51408]	450.4877	-0.5145285	0.1056812	1.24e-07	3.96e-06	323	387	300	217	174	178	199	172	292.1835	299.3085	284.3091	217.9703	173.5821	182.3912	208.4814	184.4554	Down Regulated
ENSG00000105483	ENSG00000105483.18	CARD8	48180770	48255946	-1	mRNA	caspase recruitment domain family member 8 [Source:HGNC Symbol;Acc:HGNC:17057]	3223.236	-0.2013016	0.0565605	0.0002285082	0.001965887	3020	3745	2888	3107	2383	2447	2344	2416	2731.871	2896.409	2736.949	3120.892	2377.277	2507.367	2455.681	2590.956	Down Regulated
ENSG00000268157	ENSG00000268157.1		49356152	49357769	1	lncRNA	novel transcript, antisense to TEAD2	39.37242	-0.6670231	0.2405571	0.000468871	0.003488538	87	65	45	37	37	35	21	24	78.69959	50.27145	42.64636	37.16544	36.91113	35.86344	22.00055	25.73797	Down Regulated
ENSG00000074219	ENSG00000074219.13	TEAD2	49340595	49362457	-1	mRNA	TEA domain transcription factor 2 [Source:HGNC Symbol;Acc:HGNC:11715]	32.6076	-0.4926577	0.2549027	0.006086229	0.02684028	78	64	45	28	32	33	33	20	70.55825	49.49805	42.64636	28.1252	31.92314	33.8141	34.5723	21.44831	Down Regulated
ENSG00000267858	ENSG00000267858.5	MZF1-AS1	58559125	58574797	1	lncRNA	MZF1 antisense RNA 1 [Source:HGNC Symbol;Acc:HGNC:51271]	157.0375	0.3747746	0.1276581	0.000799575	0.005297116	184	195	160	162	234	232	180	174	166.4451	150.8144	151.6315	162.7244	233.438	237.7234	188.5762	186.6003	Up Regulated
ENSG00000099326	ENSG00000099326.8	MZF1	58561931	58573575	-1	mRNA	myeloid zinc finger 1 [Source:HGNC Symbol;Acc:HGNC:13108]	705.8285	0.4175678	0.0941357	2.005638e-06	3.939896e-05	692	824	771	739	975	942	841	840	625.9783	637.2874	730.6744	742.3043	972.6583	965.2389	881.0698	900.8289	Up Regulated
ENSG00000271855	ENSG00000271855.1		9555899	9556775	1	lncRNA	novel transcript	24.2627	0.7821897	0.3342853	0.001230516	0.00749902	13	14	15	13	27	31	22	15	11.75971	10.8277	14.21545	13.05813	26.93515	31.76476	23.0482	16.08623	Up Regulated
ENSG00000151694	ENSG00000151694.13	ADAM17	9488486	9556732	-1	mRNA	ADAM metallopeptidase domain 17 [Source:HGNC Symbol;Acc:HGNC:195]	7102.913	0.2012915	0.07513099	0.004412157	0.02086606	3936	3847	4413	4304	4155	4182	4118	4426	3560.478	2975.297	4182.187	4323.245	4145.021	4285.169	4314.204	4746.511	Up Regulated
ENSG00000228925	ENSG00000228925.1		46899275	46908678	1	lncRNA	novel transcript, antisense to MCFD2	43.60622	-0.8308632	0.2349068	2.95e-05	0.000367371	47	42	63	84	26	22	23	38	42.51587	32.48309	59.70491	84.37559	25.93755	22.54273	24.09584	40.75178	Down Regulated
ENSG00000180398	ENSG00000180398.12	MCFD2	46901870	46941855	-1	mRNA	multiple coagulation factor deficiency 2, ER cargo receptor complex subunit [Source:HGNC Symbol;Acc:HGNC:18451]	6776.794	-0.1782554	0.05439738	0.0007135946	0.004849292	6149	6971	5086	4301	4465	4421	4294	3909	5562.342	5391.42	4819.987	4320.231	4454.276	4530.065	4498.589	4192.072	Down Regulated
ENSG00000233845	ENSG00000233845.1		47035279	47040524	-1	lncRNA	novel transcript	104.047	0.5490299	0.207867	0.000930654	0.006001095	111	232	240	148	237	197	251	310	100.4098	179.4304	227.4473	148.6618	236.4308	201.8599	262.959	332.4488	Up Regulated
ENSG00000068724	ENSG00000068724.16	TTC7A	46915869	47076137	1	mRNA	tetratricopeptide repeat domain 7A [Source:HGNC Symbol;Acc:HGNC:19750]	4251.09	0.3912507	0.159151	0.002884298	0.01483938	5938	9841	6907	4908	8465	7992	7840	8333	5371.473	7611.098	6545.743	4929.945	8444.669	8189.16	8213.54	8936.437	Up Regulated
ENSG00000225187	ENSG00000225187.1		47067822	47071204	1	lncRNA	novel transcript	54.6038	0.4980118	0.2499733	0.005470867	0.02464499	65	120	123	80	127	111	143	146	58.79854	92.80884	116.5667	80.3577	126.695	113.7383	149.8133	156.5726	Up Regulated
ENSG00000239605	ENSG00000239605.11	STPG4	47045538	47155308	-1	mRNA	sperm-tail PG-rich repeat containing 4 [Source:HGNC Symbol;Acc:HGNC:26850]	58.34752	0.4018153	0.1683245	0.003277737	0.01643075	81	107	111	80	120	100	121	120	73.27203	82.75455	105.1944	80.3577	119.7118	102.467	126.7651	128.6898	Up Regulated
ENSG00000225187	ENSG00000225187.1		47067822	47071204	1	lncRNA	novel transcript	54.6038	0.4980118	0.2499733	0.005470867	0.02464499	65	120	123	80	127	111	143	146	58.79854	92.80884	116.5667	80.3577	126.695	113.7383	149.8133	156.5726	Up Regulated
ENSG00000068724	ENSG00000068724.16	TTC7A	46915869	47076137	1	mRNA	tetratricopeptide repeat domain 7A [Source:HGNC Symbol;Acc:HGNC:19750]	4251.09	0.3912507	0.159151	0.002884298	0.01483938	5938	9841	6907	4908	8465	7992	7840	8333	5371.473	7611.098	6545.743	4929.945	8444.669	8189.16	8213.54	8936.437	Up Regulated
ENSG00000212978	ENSG00000212978.6	C2orf74-DT	61141592	61144969	-1	lncRNA	C2orf74 divergent transcript [Source:HGNC Symbol;Acc:HGNC:27941]	423.4271	-0.2412174	0.0923138	0.004322467	0.02051354	675	694	438	364	408	416	390	340	610.6003	536.7444	415.0913	365.6276	407.0201	426.2626	408.5817	364.6212	Down Regulated
ENSG00000162929	ENSG00000162929.13	SANBR	61065871	61138034	1	mRNA	SANT and BTB domain regulator of CSR [Source:HGNC Symbol;Acc:HGNC:29387]	399.2619	-0.2937361	0.1098823	0.002677292	0.01398702	476	611	509	549	393	308	371	413	430.5863	472.5517	482.3778	551.4547	392.0561	315.5983	388.6764	442.9076	Down Regulated
ENSG00000228079	ENSG00000228079.2		64086353	64088246	-1	lncRNA	novel transcript	22.30218	1.118971	0.474002	0.000786035	0.00523038	6	6	17	12	16	22	22	36	5.427558	4.640442	16.11085	12.05366	15.96157	22.54273	23.0482	38.60695	Up Regulated
ENSG00000197329	ENSG00000197329.12	PELI1	64092652	64144420	-1	mRNA	pellino E3 ubiquitin protein ligase 1 [Source:HGNC Symbol;Acc:HGNC:8827]	895.3441	1.004354	0.1998953	3.380553e-08	1.343753e-06	481	509	610	467	888	941	968	1008	435.1092	393.6642	578.0952	469.0881	885.8672	964.2142	1014.121	1080.995	Up Regulated
ENSG00000225889	ENSG00000225889.7		64143239	64257610	1	lncRNA	novel transcript, antisense to PELI1	41.93975	1.175067	0.2026912	4.72e-10	3.23e-08	38	32	36	18	69	63	52	70	34.37453	24.74902	34.11709	18.08048	68.83428	64.55419	54.47756	75.06908	Up Regulated
ENSG00000197329	ENSG00000197329.12	PELI1	64092652	64144420	-1	mRNA	pellino E3 ubiquitin protein ligase 1 [Source:HGNC Symbol;Acc:HGNC:8827]	895.3441	1.004354	0.1998953	3.380553e-08	1.343753e-06	481	509	610	467	888	941	968	1008	435.1092	393.6642	578.0952	469.0881	885.8672	964.2142	1014.121	1080.995	Up Regulated
ENSG00000273064	ENSG00000273064.1		68252870	68253848	1	lncRNA	novel transcript	14.33677	-0.563436	0.3368017	0.007430458	0.03136481	23	34	28	37	12	17	19	13	20.80564	26.29584	26.53552	37.16544	11.97118	17.41939	19.90526	13.9414	Down Regulated
ENSG00000221823	ENSG00000221823.11	PPP3R1	68178857	68256237	-1	mRNA	protein phosphatase 3 regulatory subunit B, alpha [Source:HGNC Symbol;Acc:HGNC:9317]	817.6425	-0.1919898	0.07525231	0.006660392	0.02887639	1171	1301	991	1031	906	825	790	860	1059.278	1006.202	939.1677	1035.61	903.824	845.3525	827.6398	922.2772	Down Regulated
ENSG00000203395	ENSG00000203395.2		68361214	68365584	-1	lncRNA	novel transcript, antisense to PLEK	112.2845	2.699446	0.1857584	6.85e-49	1.55e-45	70	87	48	30	308	339	332	350	63.32151	67.28641	45.48945	30.13414	307.2603	347.363	347.8183	375.3454	Up Regulated
ENSG00000115956	ENSG00000115956.10	PLEK	68365282	68397453	1	mRNA	pleckstrin [Source:HGNC Symbol;Acc:HGNC:9070]	12754.7	0.5382796	0.1250024	2.33858e-06	4.485481e-05	10679	12128	9525	7716	12181	12692	13396	13384	9660.148	9379.88	9026.814	7750.501	12151.74	13005.11	14034.26	14353.21	Up Regulated
ENSG00000235499	ENSG00000235499.1		73985132	73986343	1	lncRNA	novel transcript (LOC100132318)	103.5643	0.4272923	0.167755	0.001938013	0.01080581	115	146	103	133	174	141	141	159	104.0282	112.9174	97.61279	133.5947	173.5821	144.4784	147.718	170.514	Up Regulated
ENSG00000187605	ENSG00000187605.15	TET3	73984910	74108176	1	mRNA	tet methylcytosine dioxygenase 3 [Source:HGNC Symbol;Acc:HGNC:28313]	3771.296	0.232521	0.0713328	0.0005841675	0.004148815	4687	5729	4833	5530	5761	5011	5227	5575	4239.827	4430.849	4580.219	5554.726	5747.163	5134.62	5476.042	5978.716	Up Regulated
ENSG00000230393	ENSG00000230393.1		100104919	100107504	1	lncRNA	novel transcript	12.75471	-0.7403241	0.5193029	0.006362719	0.02782358	19	26	22	56	14	16	4	16	17.18727	20.10858	20.84933	56.25039	13.96638	16.39472	4.190581	17.15865	Down Regulated
ENSG00000144218	ENSG00000144218.18	AFF3	99545419	100192428	-1	mRNA	ALF transcription elongation factor 3 [Source:HGNC Symbol;Acc:HGNC:6473]	427.2177	-0.3771764	0.1981606	0.01075076	0.04190548	552	793	499	1509	542	443	538	602	499.3353	613.3117	472.9008	1515.747	540.6982	453.9287	563.6332	645.5941	Down Regulated
ENSG00000172965	ENSG00000172965.15	MIR4435-2HG	111006015	111523376	-1	lncRNA	MIR4435-2 host gene [Source:HGNC Symbol;Acc:HGNC:35163]	1231.612	0.4179495	0.06408418	4.64e-11	4.11e-09	1033	1080	1198	939	1344	1174	1198	1255	934.4445	835.2795	1135.341	943.1986	1340.772	1202.962	1255.079	1345.881	Up Regulated
ENSG00000226928	ENSG00000226928.1	RPS14P4	111295629	111296046	-1	mRNA	ribosomal protein S14 pseudogene 4 [Source:HGNC Symbol;Acc:HGNC:36419]	22.00785	0.530563	0.2507571	0.003621098	0.01777813	26	17	36	20	37	37	31	34	23.51942	13.14792	34.11709	20.08943	36.91113	37.91278	32.47701	36.46212	Up Regulated
ENSG00000280228	ENSG00000280228.1		112840328	112844195	1	lncRNA	TEC	51.60995	1.727625	0.3207697	4.25e-09	2.29e-07	32	34	18	9	69	54	81	79	28.94697	26.29584	17.05855	9.040242	68.83428	55.33217	84.85927	84.72082	Up Regulated
ENSG00000125538	ENSG00000125538.11	IL1B	112829751	112836816	-1	mRNA	interleukin 1 beta [Source:HGNC Symbol;Acc:HGNC:5992]	10237.06	5.566696	0.4120685	5.250532e-43	8.203754e-40	88	133	72	150	4379	4523	5318	4962	79.60418	102.8631	68.23418	150.6707	4368.483	4634.581	5571.378	5321.325	Up Regulated
ENSG00000234199	ENSG00000234199.2	LINC01191	113970719	114007304	1	lncRNA	long intergenic non-protein coding RNA 1191 [Source:HGNC Symbol;Acc:HGNC:49595]	33.49501	0.5400216	0.268723	0.004391623	0.020798	27	27	23	15	18	32	40	40	24.42401	20.88199	21.79703	15.06707	17.95677	32.78943	41.90581	42.89662	Up Regulated
ENSG00000212182	ENSG00000212182.2	U3	114005440	114005655	-1	mRNA	Small nucleolar RNA U3 [Source:RFAM;Acc:RF00012]	12.20217	0.7581907	0.4742923	0.005419104	0.02444976	13	9	3	6	17	18	14	9	11.75971	6.960663	2.843091	6.026828	16.95917	18.44406	14.66704	9.651739	Up Regulated
ENSG00000236859	ENSG00000236859.6	NIFK-AS1	121649320	121728563	1	lncRNA	NIFK antisense RNA 1 [Source:HGNC Symbol;Acc:HGNC:27385]	129.9207	-0.2409088	0.1089258	0.0125342	0.04714541	176	206	172	123	122	124	123	115	159.2084	159.3218	163.0039	123.55	121.707	127.059	128.8604	123.3278	Down Regulated
ENSG00000155438	ENSG00000155438.12	NIFK	121726945	121736911	-1	mRNA	nucleolar protein interacting with the FHA domain of MKI67 [Source:HGNC Symbol;Acc:HGNC:17838]	783.5953	-0.2312781	0.084039	0.002696406	0.01407592	465	686	611	630	432	460	421	435	420.6357	530.5572	579.0429	632.8169	430.9624	471.3481	441.0587	466.5007	Down Regulated
ENSG00000236859	ENSG00000236859.6	NIFK-AS1	121649320	121728563	1	lncRNA	NIFK antisense RNA 1 [Source:HGNC Symbol;Acc:HGNC:27385]	129.9207	-0.2409088	0.1089258	0.0125342	0.04714541	176	206	172	123	122	124	123	115	159.2084	159.3218	163.0039	123.55	121.707	127.059	128.8604	123.3278	Down Regulated
ENSG00000213239	ENSG00000213239.3	NPM1P32	121708512	121709115	-1	mRNA	nucleophosmin 1 pseudogene 32 [Source:HGNC Symbol;Acc:HGNC:45211]	92.73591	-0.3612971	0.1810205	0.01000118	0.03964559	77	79	60	66	26	54	47	51	69.65366	61.09915	56.86182	66.29511	25.93755	55.33217	49.23933	54.69318	Down Regulated
ENSG00000283118	ENSG00000283118.1		144444848	144450450	1	lncRNA	novel transcript, antisense to ZEB2	538.2133	0.5554651	0.1426443	1.28e-05	0.000183435	654	758	949	806	929	940	1155	1210	591.6038	586.2425	899.3644	809.6039	926.7687	963.1895	1210.03	1297.623	Up Regulated
ENSG00000169554	ENSG00000169554.20	ZEB2	144364364	144521057	-1	mRNA	zinc finger E-box binding homeobox 2 [Source:HGNC Symbol;Acc:HGNC:14881]	22212.96	0.4057022	0.06773148	5.080455e-10	3.439807e-08	23867	31639	28306	21211	29522	29707	31127	31267	21589.92	24469.82	26825.51	21305.84	29451.09	30439.86	32610.06	33531.21	Up Regulated
ENSG00000279166	ENSG00000279166.1		144494265	144496878	-1	lncRNA	TEC	2762.305	0.5070847	0.1133781	1.22e-06	2.59e-05	2972	4431	3911	3466	4305	4353	4862	5157	2688.45	3426.966	3706.443	3481.498	4294.66	4460.387	5093.652	5530.446	Up Regulated
ENSG00000169554	ENSG00000169554.20	ZEB2	144364364	144521057	-1	mRNA	zinc finger E-box binding homeobox 2 [Source:HGNC Symbol;Acc:HGNC:14881]	22212.96	0.4057022	0.06773148	5.080455e-10	3.439807e-08	23867	31639	28306	21211	29522	29707	31127	31267	21589.92	24469.82	26825.51	21305.84	29451.09	30439.86	32610.06	33531.21	Up Regulated
ENSG00000238057	ENSG00000238057.9	ZEB2-AS1	144517978	144521477	1	lncRNA	ZEB2 antisense RNA 1 [Source:HGNC Symbol;Acc:HGNC:37149]	764.8641	0.5634416	0.1024388	5.3e-09	2.75e-07	672	956	647	508	886	922	887	906	607.8865	739.3771	613.1599	510.2714	883.872	944.7455	929.2614	971.6083	Up Regulated
ENSG00000169554	ENSG00000169554.20	ZEB2	144364364	144521057	-1	mRNA	zinc finger E-box binding homeobox 2 [Source:HGNC Symbol;Acc:HGNC:14881]	22212.96	0.4057022	0.06773148	5.080455e-10	3.439807e-08	23867	31639	28306	21211	29522	29707	31127	31267	21589.92	24469.82	26825.51	21305.84	29451.09	30439.86	32610.06	33531.21	Up Regulated
ENSG00000286207	ENSG00000286207.1		152635268	152641275	-1	lncRNA	novel transcript, antisense to FMNL2	537.5421	0.5878827	0.09856516	3.14e-10	2.29e-08	371	405	557	380	605	556	552	584	335.604	313.2298	527.8672	381.6991	603.5469	569.7164	578.3002	626.2906	Up Regulated
ENSG00000157827	ENSG00000157827.20	FMNL2	152335174	152649826	1	mRNA	formin like 2 [Source:HGNC Symbol;Acc:HGNC:18267]	6372.823	0.2642232	0.08816138	0.001186189	0.007287924	3236	3648	4189	2455	3855	3624	3442	3470	2927.263	2821.389	3969.903	2465.977	3845.741	3713.403	3605.995	3721.281	Up Regulated
ENSG00000224467	ENSG00000224467.1	TANK-AS1	161096231	161160224	-1	lncRNA	TANK antisense RNA 1 [Source:HGNC Symbol;Acc:HGNC:40575]	59.73624	2.901284	0.2334532	1.48e-36	1.51e-33	18	29	36	11	153	126	169	175	16.28267	22.4288	34.11709	11.04918	152.6325	129.1084	177.0521	187.6727	Up Regulated
ENSG00000136560	ENSG00000136560.13	TANK	161136908	161236230	1	mRNA	TRAF family member associated NFKB activator [Source:HGNC Symbol;Acc:HGNC:11562]	3137.093	0.9469718	0.1080714	1.481973e-19	4.18081e-17	1785	1824	1872	1526	2589	2790	3330	3232	1614.698	1410.694	1774.089	1532.823	2582.782	2858.829	3488.659	3466.047	Up Regulated
ENSG00000235724	ENSG00000235724.9	PSMD14-DT	161222785	161308389	-1	lncRNA	PSMD14 divergent transcript [Source:HGNC Symbol;Acc:HGNC:56104]	78.54982	1.119602	0.225414	4.21e-08	1.61e-06	36	46	43	48	62	68	87	128	32.56535	35.57672	40.75097	48.21462	61.85109	69.67754	91.14515	137.2692	Up Regulated
ENSG00000115233	ENSG00000115233.12	PSMD14	161308425	161411717	1	mRNA	proteasome 26S subunit, non-ATPase 14 [Source:HGNC Symbol;Acc:HGNC:16889]	1713.717	-0.271784	0.0657982	1.579978e-05	0.0002177239	1384	1586	1319	1216	909	1112	1007	898	1251.957	1226.623	1250.012	1221.437	906.8168	1139.433	1054.979	963.029	Down Regulated
ENSG00000235724	ENSG00000235724.9	PSMD14-DT	161222785	161308389	-1	lncRNA	PSMD14 divergent transcript [Source:HGNC Symbol;Acc:HGNC:56104]	78.54982	1.119602	0.225414	4.21e-08	1.61e-06	36	46	43	48	62	68	87	128	32.56535	35.57672	40.75097	48.21462	61.85109	69.67754	91.14515	137.2692	Up Regulated
ENSG00000136560	ENSG00000136560.13	TANK	161136908	161236230	1	mRNA	TRAF family member associated NFKB activator [Source:HGNC Symbol;Acc:HGNC:11562]	3137.093	0.9469718	0.1080714	1.481973e-19	4.18081e-17	1785	1824	1872	1526	2589	2790	3330	3232	1614.698	1410.694	1774.089	1532.823	2582.782	2858.829	3488.659	3466.047	Up Regulated
ENSG00000236841	ENSG00000236841.7		162159762	162173223	1	lncRNA	novel transcript	14.0072	-0.6399428	0.6460334	0.01294199	0.04842102	13	22	6	7	3	6	4	5	11.75971	17.01495	5.686182	7.031299	2.992795	6.148018	4.190581	5.362077	Down Regulated
ENSG00000078098	ENSG00000078098.14	FAP	162170684	162245151	-1	mRNA	fibroblast activation protein alpha [Source:HGNC Symbol;Acc:HGNC:3590]	226.6243	-0.6359873	0.2558853	0.001099349	0.006858099	219	204	71	62	69	79	71	56	198.1059	157.775	67.28649	62.27722	68.83428	80.94891	74.38282	60.05526	Down Regulated
ENSG00000235321	ENSG00000235321.1		169100743	169101210	1	lncRNA	novel transcript	34.18177	-1.213787	0.3707971	5.08e-05	0.00057383	47	85	37	174	28	26	32	30	42.51587	65.73959	35.06479	174.778	27.93275	26.64141	33.52465	32.17246	Down Regulated
ENSG00000073737	ENSG00000073737.16	DHRS9	169064789	169096167	1	mRNA	dehydrogenase/reductase 9 [Source:HGNC Symbol;Acc:HGNC:16888]	1664.903	-0.5736524	0.2537194	0.002179559	0.01188489	2228	4240	1968	4393	1642	1855	1718	1565	2015.433	3279.246	1865.068	4412.642	1638.056	1900.762	1799.855	1678.33	Down Regulated
ENSG00000222043	ENSG00000222043.2		177264359	177265515	1	lncRNA	novel transcript	26.57552	2.097166	0.2865892	1.97e-14	3.04e-12	13	14	14	8	57	54	35	46	11.75971	10.8277	13.26776	8.03577	56.8631	55.33217	36.66759	49.33111	Up Regulated
ENSG00000116044	ENSG00000116044.16	NFE2L2	177218667	177392756	-1	mRNA	NFE2 like bZIP transcription factor 2 [Source:HGNC Symbol;Acc:HGNC:7782]	5499.2	1.176441	0.1074405	4.533895e-29	2.790681e-26	2987	3354	2822	2567	5423	5693	6027	6150	2702.019	2594.007	2674.401	2578.478	5409.975	5833.445	6314.159	6595.355	Up Regulated
ENSG00000223960	ENSG00000223960.6	CHROMR	178413635	178440243	1	lncRNA	cholesterol induced regulator of metabolism RNA [Source:HGNC Symbol;Acc:HGNC:54059]	503.5017	-0.3209157	0.09513841	0.000243173	0.002069016	899	997	660	548	503	503	567	523	813.2291	771.0868	625.48	550.4503	501.7919	515.4089	594.0149	560.8732	Down Regulated
ENSG00000180228	ENSG00000180228.13	PRKRA	178431292	178451512	-1	mRNA	protein activator of interferon induced protein kinase EIF2AK2 [Source:HGNC Symbol;Acc:HGNC:9438]	368.8227	-0.2809317	0.09308206	0.001061936	0.006667708	445	443	382	360	295	277	291	284	402.5439	342.6193	362.0202	361.6097	294.2915	283.8335	304.8648	304.566	Down Regulated
ENSG00000260742	ENSG00000260742.1	ITPRID2-DT	181887851	181891663	-1	lncRNA	ITPRID2 divergent transcript [Source:HGNC Symbol;Acc:HGNC:55386]	52.52108	-0.3621299	0.1933217	0.01304249	0.04866112	79	92	62	81	56	47	43	51	71.46284	71.15344	58.75721	81.36218	55.8655	48.15948	45.04875	54.69318	Down Regulated
ENSG00000138434	ENSG00000138434.17	ITPRID2	181891730	181930738	1	mRNA	ITPR interacting domain containing 2 [Source:HGNC Symbol;Acc:HGNC:11319]	5480.333	-0.2581613	0.05443926	1.002022e-06	2.203967e-05	5541	6333	4744	4978	3832	3962	3976	3810	5012.35	4897.986	4495.874	5000.258	3822.796	4059.741	4165.438	4085.903	Down Regulated
ENSG00000231621	ENSG00000231621.1	ANKRD44-AS1	197197927	197199276	1	lncRNA	ANKRD44 antisense RNA 1 [Source:HGNC Symbol;Acc:HGNC:41090]	13.82468	0.5710828	0.3362525	0.006964685	0.02989181	20	12	16	11	22	18	21	29	18.09186	9.280884	15.16315	11.04918	21.94716	18.44406	22.00055	31.10005	Up Regulated
ENSG00000065413	ENSG00000065413.20	ANKRD44	196967017	197311173	-1	mRNA	ankyrin repeat domain 44 [Source:HGNC Symbol;Acc:HGNC:25259]	3372.059	0.2363256	0.07748273	0.001162925	0.007184105	2917	2780	3187	1679	2827	2793	2682	2650	2638.698	2150.071	3020.31	1686.507	2820.21	2861.903	2809.785	2841.901	Up Regulated
ENSG00000226312	ENSG00000226312.7	CFLAR-AS1	201140278	201157823	-1	lncRNA	CFLAR antisense RNA 1 [Source:HGNC Symbol;Acc:HGNC:14437]	289.5022	0.8482384	0.2184798	7.47e-06	0.000117006	253	273	314	287	437	434	457	565	228.862	211.1401	297.5769	288.2833	435.9504	444.7067	478.7739	605.9147	Up Regulated
ENSG00000235579	ENSG00000235579.1	RPL38P5	201162484	201162680	-1	mRNA	RPL38 pseudogene 5 [Source:HGNC Symbol;Acc:HGNC:54607]	38.74688	0.7035031	0.3304867	0.002316691	0.01249181	10	16	11	12	14	21	23	22	9.04593	12.37451	10.42467	12.05366	13.96638	21.51806	24.09584	23.59314	Up Regulated
ENSG00000237892	ENSG00000237892.1	KLF7-IT1	207120884	207122044	-1	lncRNA	KLF7 intronic transcript 1 [Source:HGNC Symbol;Acc:HGNC:41355]	92.29072	0.6275876	0.1391162	8.77e-07	1.97e-05	113	128	135	114	165	147	181	186	102.219	98.99609	127.9391	114.5097	164.6037	150.6264	189.6238	199.4693	Up Regulated
ENSG00000118263	ENSG00000118263.15	KLF7	207074137	207173856	-1	mRNA	KLF transcription factor 7 [Source:HGNC Symbol;Acc:HGNC:6350]	1988.913	0.3239756	0.07781652	1.055031e-05	0.0001557048	2426	2749	2131	2146	2652	2669	2525	2568	2194.543	2126.096	2019.542	2155.595	2645.63	2734.844	2645.305	2753.963	Up Regulated
ENSG00000286059	ENSG00000286059.1		233977872	233980018	-1	lncRNA	novel transcript, antisense to TRPM8	57.48512	0.6514158	0.3371118	0.003647073	0.01788061	11	12	27	14	28	26	21	28	9.950523	9.280884	25.58782	14.0626	27.93275	26.64141	22.00055	30.02763	Up Regulated
ENSG00000144481	ENSG00000144481.17	TRPM8	233917373	234019522	1	mRNA	transient receptor potential cation channel subfamily M member 8 [Source:HGNC Symbol;Acc:HGNC:17961]	2585.262	0.5497883	0.1678368	0.0001291367	0.001228583	314	318	675	163	542	523	466	453	284.0422	245.9434	639.6955	163.7288	540.6982	535.9023	488.2027	485.8042	Up Regulated
ENSG00000225057	ENSG00000225057.2		238231684	238255633	1	lncRNA	novel transcript	112.8416	0.6946382	0.1890131	2.13e-05	0.000280773	76	110	125	145	168	165	163	190	68.74907	85.07477	118.4621	145.6483	167.5965	169.0705	170.7662	203.7589	Up Regulated
ENSG00000132326	ENSG00000132326.12	PER2	238244044	238290102	-1	mRNA	period circadian regulator 2 [Source:HGNC Symbol;Acc:HGNC:8846]	1813.494	0.5896797	0.1492957	9.237392e-06	0.0001390098	1373	1510	1716	2029	2250	2275	2265	2377	1242.006	1167.845	1626.248	2038.072	2244.596	2331.124	2372.917	2549.131	Up Regulated
ENSG00000236526	ENSG00000236526.1	BTBD3-AS1	11909404	11918677	-1	lncRNA	BTBD3 antisense RNA 1 [Source:HGNC Symbol;Acc:HGNC:40728]	85.91981	-0.5636968	0.1839456	0.00024779	0.002098006	161	118	133	195	91	77	97	78	145.6395	91.26202	126.0437	195.8719	90.78144	78.89957	101.6216	83.6484	Down Regulated
ENSG00000132640	ENSG00000132640.15	BTBD3	11890723	11926609	1	mRNA	BTB domain containing 3 [Source:HGNC Symbol;Acc:HGNC:15854]	865.7284	-0.4552592	0.08226348	2.691039e-09	1.535404e-07	1032	909	809	935	644	571	602	489	933.5399	703.0269	766.6869	939.1807	642.4533	585.0864	630.6825	524.4111	Down Regulated
ENSG00000275576	ENSG00000275576.1		32116171	32116629	1	lncRNA	novel transcript, sense intronic to TM9SF4	23.84526	0.5210503	0.2682367	0.005334454	0.02416446	22	28	24	25	31	34	30	44	19.90105	21.6554	22.74473	25.11178	30.92554	34.83877	31.42936	47.18628	Up Regulated
ENSG00000101337	ENSG00000101337.15	TM9SF4	32109714	32167258	1	mRNA	transmembrane 9 superfamily member 4 [Source:HGNC Symbol;Acc:HGNC:30797]	1934.404	0.2653747	0.08218529	0.0005448658	0.003929656	2273	2316	2245	1940	2381	2370	2339	2248	2056.14	1791.211	2127.58	1948.674	2375.281	2428.467	2450.443	2410.79	Up Regulated
ENSG00000230753	ENSG00000230753.5	ZNF341-AS1	33787373	33811109	-1	lncRNA	ZNF341 antisense RNA 1 [Source:HGNC Symbol;Acc:HGNC:50736]	29.7019	1.054494	0.329316	8.59e-05	0.000888034	11	11	14	5	22	17	19	25	9.950523	8.507477	13.26776	5.022357	21.94716	17.41939	19.90526	26.81038	Up Regulated
ENSG00000101421	ENSG00000101421.4	CHMP4B	33811348	33854366	1	mRNA	charged multivesicular body protein 4B [Source:HGNC Symbol;Acc:HGNC:16171]	1107.532	0.2900297	0.08171604	0.0001512039	0.00139349	828	1036	799	666	936	858	888	890	749.003	801.2496	757.2099	668.9779	933.7519	879.1666	930.3091	954.4497	Up Regulated
ENSG00000230753	ENSG00000230753.5	ZNF341-AS1	33787373	33811109	-1	lncRNA	ZNF341 antisense RNA 1 [Source:HGNC Symbol;Acc:HGNC:50736]	29.7019	1.054494	0.329316	8.59e-05	0.000888034	11	11	14	5	22	17	19	25	9.950523	8.507477	13.26776	5.022357	21.94716	17.41939	19.90526	26.81038	Up Regulated
ENSG00000131061	ENSG00000131061.14	ZNF341	33731657	33792269	1	mRNA	zinc finger protein 341 [Source:HGNC Symbol;Acc:HGNC:15992]	168.8224	0.3636282	0.1452792	0.0029492	0.01511586	206	234	214	161	242	242	260	208	186.3462	180.9772	202.8072	161.7199	241.4188	247.9701	272.3878	223.0624	Up Regulated
ENSG00000177410	ENSG00000177410.12	ZFAS1	49278178	49299600	1	lncRNA	ZNFX1 antisense RNA 1 [Source:HGNC Symbol;Acc:HGNC:33101]	1013.629	0.4517591	0.09627621	5.21e-07	1.29e-05	856	1041	1010	883	1227	1252	1112	1023	774.3316	805.1167	957.1739	886.9482	1224.053	1282.886	1164.982	1097.081	Up Regulated
ENSG00000158445	ENSG00000158445.10	KCNB1	49293394	49484297	-1	mRNA	potassium voltage-gated channel subfamily B member 1 [Source:HGNC Symbol;Acc:HGNC:6231]	28.10019	0.9353355	0.5047927	0.002556569	0.01348018	12	7	17	16	20	32	26	34	10.85512	5.413849	16.11085	16.07154	19.95196	32.78943	27.23878	36.46212	Up Regulated
ENSG00000177410	ENSG00000177410.12	ZFAS1	49278178	49299600	1	lncRNA	ZNFX1 antisense RNA 1 [Source:HGNC Symbol;Acc:HGNC:33101]	1013.629	0.4517591	0.09627621	5.21e-07	1.29e-05	856	1041	1010	883	1227	1252	1112	1023	774.3316	805.1167	957.1739	886.9482	1224.053	1282.886	1164.982	1097.081	Up Regulated
ENSG00000222365	ENSG00000222365.1	SNORD12B	49280319	49280409	1	mRNA	small nucleolar RNA, C/D box 12B [Source:HGNC Symbol;Acc:HGNC:33573]	73.15	0.8171355	0.1733701	2.018607e-07	5.891083e-06	59	71	56	61	105	104	94	92	53.37098	54.9119	53.07103	61.27275	104.7478	106.5657	98.47866	98.66222	Up Regulated
ENSG00000177410	ENSG00000177410.12	ZFAS1	49278178	49299600	1	lncRNA	ZNFX1 antisense RNA 1 [Source:HGNC Symbol;Acc:HGNC:33101]	1013.629	0.4517591	0.09627621	5.21e-07	1.29e-05	856	1041	1010	883	1227	1252	1112	1023	774.3316	805.1167	957.1739	886.9482	1224.053	1282.886	1164.982	1097.081	Up Regulated
ENSG00000209042	ENSG00000209042.1	SNORD12C	49278940	49279028	1	mRNA	small nucleolar RNA, C/D box 12C [Source:HGNC Symbol;Acc:HGNC:10105]	42.38134	0.9140854	0.2545176	2.185483e-05	0.0002869523	32	28	37	28	61	53	52	57	28.94697	21.6554	35.06479	28.1252	60.85349	54.3075	54.47756	61.12768	Up Regulated
ENSG00000177410	ENSG00000177410.12	ZFAS1	49278178	49299600	1	lncRNA	ZNFX1 antisense RNA 1 [Source:HGNC Symbol;Acc:HGNC:33101]	1013.629	0.4517591	0.09627621	5.21e-07	1.29e-05	856	1041	1010	883	1227	1252	1112	1023	774.3316	805.1167	957.1739	886.9482	1224.053	1282.886	1164.982	1097.081	Up Regulated
ENSG00000124201	ENSG00000124201.15	ZNFX1	49237946	49278426	-1	mRNA	zinc finger NFX1-type containing 1 [Source:HGNC Symbol;Acc:HGNC:29271]	3738.852	0.296886	0.112989	0.003024854	0.01541416	4004	3932	3498	2819	4102	3934	3793	3813	3621.99	3041.036	3315.044	2831.605	4092.148	4031.051	3973.719	4089.12	Up Regulated
ENSG00000268858	ENSG00000268858.2		63861212	63864293	-1	lncRNA	novel transcript, antisense to ABHD16B	585.9164	0.3112962	0.1293753	0.005066502	0.02322205	482	594	534	439	601	575	565	551	436.0138	459.4037	506.0702	440.9629	599.5565	589.1851	591.9196	590.9009	Up Regulated
ENSG00000101150	ENSG00000101150.17	TPD52L2	63865228	63891545	1	mRNA	TPD52 like 2 [Source:HGNC Symbol;Acc:HGNC:12007]	6150.671	0.1899959	0.08133485	0.0121258	0.04605448	3515	4574	4312	3037	4263	3976	3751	3510	3179.644	3537.564	4086.469	3050.579	4252.761	4074.087	3929.718	3764.178	Up Regulated
ENSG00000231125	ENSG00000231125.2		29058073	29060095	-1	lncRNA	novel transcript, sense intronic to CCT8	51.44879	-0.6364327	0.2294781	0.000502263	0.003688348	68	92	68	100	34	54	49	33	61.51232	71.15344	64.44339	100.4471	33.91834	55.33217	51.33462	35.38971	Down Regulated
ENSG00000156261	ENSG00000156261.13	CCT8	29055805	29073797	-1	mRNA	chaperonin containing TCP1 subunit 8 [Source:HGNC Symbol;Acc:HGNC:1623]	4418.344	-0.4746969	0.07958724	4.466422e-10	3.064931e-08	3912	4946	3560	5073	2763	2917	2712	2488	3538.768	3825.271	3373.801	5095.683	2756.364	2988.962	2841.214	2668.169	Down Regulated
ENSG00000231125	ENSG00000231125.2		29058073	29060095	-1	lncRNA	novel transcript, sense intronic to CCT8	51.44879	-0.6364327	0.2294781	0.000502263	0.003688348	68	92	68	100	34	54	49	33	61.51232	71.15344	64.44339	100.4471	33.91834	55.33217	51.33462	35.38971	Down Regulated
ENSG00000156256	ENSG00000156256.15	USP16	29024629	29054488	1	mRNA	ubiquitin specific peptidase 16 [Source:HGNC Symbol;Acc:HGNC:12614]	1580.603	-0.2034622	0.0797226	0.006423152	0.02803934	1120	1292	1116	1218	785	915	986	866	1013.144	999.2418	1057.63	1223.446	783.1146	937.5728	1032.978	928.7117	Down Regulated
ENSG00000286018	ENSG00000286018.1		29063446	29064368	1	lncRNA	novel transcript, antisense to CCT8	104.0446	-0.4191158	0.1430214	0.000655511	0.004530365	130	175	138	169	98	86	108	91	117.5971	135.3462	130.7822	169.7557	97.76463	88.1216	113.1457	97.5898	Down Regulated
ENSG00000156261	ENSG00000156261.13	CCT8	29055805	29073797	-1	mRNA	chaperonin containing TCP1 subunit 8 [Source:HGNC Symbol;Acc:HGNC:1623]	4418.344	-0.4746969	0.07958724	4.466422e-10	3.064931e-08	3912	4946	3560	5073	2763	2917	2712	2488	3538.768	3825.271	3373.801	5095.683	2756.364	2988.962	2841.214	2668.169	Down Regulated
ENSG00000286153	ENSG00000286153.1		34836286	34884882	1	lncRNA	novel transcript, antisense to RUNX1	540.9278	0.3404314	0.1192422	0.001217236	0.007442653	510	649	733	668	703	701	700	825	461.3424	501.9411	694.6619	670.9868	701.3115	718.2935	733.3518	884.7427	Up Regulated
ENSG00000159216	ENSG00000159216.18	RUNX1	34787801	36004667	-1	mRNA	RUNX family transcription factor 1 [Source:HGNC Symbol;Acc:HGNC:10471]	5229.63	0.3253999	0.07910245	1.298843e-05	0.0001856258	6341	8351	7527	7948	8904	7736	7942	8922	5736.024	6458.722	7133.315	7983.538	8882.615	7926.845	8320.4	9568.09	Up Regulated
ENSG00000231106	ENSG00000231106.2	LINC01436	36005137	36007838	1	lncRNA	long intergenic non-protein coding RNA 1436 [Source:HGNC Symbol;Acc:HGNC:50754]	208.4131	-0.6548215	0.1179247	3.17e-09	1.78e-07	276	300	200	203	132	119	151	124	249.6677	232.0221	189.5394	203.9077	131.683	121.9357	158.1945	132.9795	Down Regulated
ENSG00000159216	ENSG00000159216.18	RUNX1	34787801	36004667	-1	mRNA	RUNX family transcription factor 1 [Source:HGNC Symbol;Acc:HGNC:10471]	5229.63	0.3253999	0.07910245	1.298843e-05	0.0001856258	6341	8351	7527	7948	8904	7736	7942	8922	5736.024	6458.722	7133.315	7983.538	8882.615	7926.845	8320.4	9568.09	Up Regulated
ENSG00000223901	ENSG00000223901.2		46220269	46225364	1	lncRNA	novel transcript	31.23535	0.4571492	0.2663922	0.01033727	0.04066046	19	25	20	26	30	34	26	32	17.18727	19.33517	18.95394	26.11625	29.92795	34.83877	27.23878	34.31729	Up Regulated
ENSG00000160285	ENSG00000160285.15	LSS	46188141	46228824	-1	mRNA	lanosterol synthase [Source:HGNC Symbol;Acc:HGNC:6708]	78.76175	0.4809233	0.2376387	0.005325625	0.02414061	35	101	52	34	85	78	79	50	31.66075	78.1141	49.28024	34.15202	84.79585	79.92424	82.76398	53.62077	Up Regulated
ENSG00000235478	ENSG00000235478.4	LINC01664	17121530	17132105	1	lncRNA	long intergenic non-protein coding RNA 1664 [Source:HGNC Symbol;Acc:HGNC:52452]	35.12035	-0.5877772	0.2794981	0.002977799	0.01522402	46	53	22	60	29	16	34	14	41.61128	40.99057	20.84933	60.26828	28.93035	16.39472	35.61994	15.01382	Down Regulated
ENSG00000183307	ENSG00000183307.3	TMEM121B	17116297	17121367	-1	mRNA	transmembrane protein 121B [Source:HGNC Symbol;Acc:HGNC:1844]	749.2281	-0.3575286	0.1508022	0.004226899	0.02016838	1065	1336	719	1793	875	812	766	769	963.3915	1033.272	681.3941	1801.017	872.8984	832.0318	802.4964	824.6874	Down Regulated
ENSG00000280007	ENSG00000280007.1		18110759	18131154	-1	lncRNA	novel transcript, antisense to TUBA8	247.0415	-0.3429986	0.1750991	0.01184904	0.04520617	497	385	207	190	222	205	191	194	449.5827	297.7617	196.1733	190.8495	221.4668	210.0573	200.1003	208.0486	Down Regulated
ENSG00000183785	ENSG00000183785.15	TUBA8	18110100	18146683	1	mRNA	tubulin alpha 8 [Source:HGNC Symbol;Acc:HGNC:12410]	38.72194	-0.6450987	0.2715518	0.001324718	0.007954911	90	63	36	38	29	27	24	32	81.41337	48.72464	34.11709	38.16991	28.93035	27.66608	25.14349	34.31729	Down Regulated
ENSG00000226471	ENSG00000226471.6		28800683	28848559	1	lncRNA	novel transcript	43.4442	0.6004693	0.2073098	0.000394082	0.003052859	27	53	26	39	48	41	60	55	24.42401	40.99057	24.64012	39.17438	47.88471	42.01146	62.85872	58.98285	Up Regulated
ENSG00000100219	ENSG00000100219.16	XBP1	28794555	28800597	-1	mRNA	X-box binding protein 1 [Source:HGNC Symbol;Acc:HGNC:12801]	2592.713	0.3796065	0.1380195	0.001359229	0.008109771	1370	2061	1139	1842	1732	1837	2076	1882	1239.292	1593.992	1079.427	1850.236	1727.84	1882.318	2174.912	2018.286	Up Regulated
ENSG00000272720	ENSG00000272720.1		38090127	38091559	1	lncRNA	novel transcript, antisense to BAIAP2L2	117.3722	0.3251307	0.1321879	0.004079832	0.01963268	135	136	121	106	167	129	132	136	122.1201	105.1833	114.6713	106.474	166.5989	132.1824	138.2892	145.8485	Up Regulated
ENSG00000128298	ENSG00000128298.17	BAIAP2L2	38084652	38111015	-1	mRNA	BAR/IMD domain containing adaptor protein 2 like 2 [Source:HGNC Symbol;Acc:HGNC:26203]	58.18266	0.426896	0.2294019	0.009597458	0.03827399	71	80	56	78	106	91	62	109	64.2261	61.87256	53.07103	78.34876	105.7454	93.24495	64.95401	116.8933	Up Regulated
ENSG00000229955	ENSG00000229955.1		38387918	38388857	-1	lncRNA	novel transcript, sense intronic to CSNK1E	18.98834	-0.6398929	0.2975424	0.002453519	0.0130324	35	51	36	45	27	9	22	24	31.66075	39.44376	34.11709	45.20121	26.93515	9.222028	23.0482	25.73797	Down Regulated
ENSG00000244627	ENSG00000244627.5	TPTEP2	38361381	38384096	-1	mRNA	TPTE pseudogene 2 [Source:HGNC Symbol;Acc:HGNC:53828]	151.4629	-0.2997932	0.1076705	0.001872275	0.01051705	239	268	222	259	180	175	161	167	216.1977	207.2731	210.3887	260.1581	179.5677	179.3172	168.6709	179.0934	Down Regulated
ENSG00000280383	ENSG00000280383.1		45657019	45680130	1	lncRNA	novel transcript, sense overlapping ATXN10	218.0554	-0.4008502	0.1426302	0.000861287	0.005630661	289	424	272	425	230	207	207	245	261.4274	327.9246	257.7736	426.9003	229.4476	212.1066	216.8626	262.7418	Down Regulated
ENSG00000130638	ENSG00000130638.17	ATXN10	45671798	45845307	1	mRNA	ataxin 10 [Source:HGNC Symbol;Acc:HGNC:10549]	1633.935	-0.2607689	0.0536165	5.423562e-07	1.333697e-05	1477	1787	1360	1342	1117	1078	1106	996	1336.084	1382.078	1288.868	1348	1114.317	1104.594	1158.696	1068.126	Down Regulated
ENSG00000233912	ENSG00000233912.1		5156905	5187329	-1	lncRNA	novel transcript, antisense to ARL8B	67.26569	0.4552448	0.2069237	0.003968178	0.01919087	60	96	117	118	122	117	114	157	54.27558	74.24707	110.8805	118.5276	121.707	119.8864	119.4316	168.3692	Up Regulated
ENSG00000134109	ENSG00000134109.11	EDEM1	5187646	5219958	1	mRNA	ER degradation enhancing alpha-mannosidase like protein 1 [Source:HGNC Symbol;Acc:HGNC:18967]	5463.437	-0.2638377	0.08610471	0.0009487616	0.006083589	7076	10555	5700	9317	5659	5771	5766	6013	6400.9	8163.311	5401.873	9358.659	5645.408	5913.369	6040.723	6448.434	Down Regulated
ENSG00000228242	ENSG00000228242.6	XPC-AS1	14144637	14165978	1	lncRNA	XPC antisense RNA 1 [Source:HGNC Symbol;Acc:HGNC:55014]	133.0259	0.3248295	0.1465292	0.00745251	0.0314122	124	122	137	125	133	168	132	150	112.1695	94.35565	129.8345	125.5589	132.6806	172.1445	138.2892	160.8623	Up Regulated
ENSG00000170876	ENSG00000170876.7	TMEM43	14125015	14143680	1	mRNA	transmembrane protein 43 [Source:HGNC Symbol;Acc:HGNC:28472]	2247.302	-0.2613037	0.06904438	6.985376e-05	0.0007495349	1339	1517	1400	1827	1185	1127	1063	1047	1211.25	1173.258	1326.776	1835.169	1182.154	1154.803	1113.647	1122.819	Down Regulated
ENSG00000225733	ENSG00000225733.5	FGD5-AS1	14920347	14948424	-1	lncRNA	FGD5 antisense RNA 1 [Source:HGNC Symbol;Acc:HGNC:40410]	3647.569	-0.2561078	0.07776813	0.000455763	0.003409748	4488	4899	3648	2710	2862	2977	2908	2473	4059.813	3788.921	3457.199	2722.117	2855.126	3050.442	3046.553	2652.083	Down Regulated
ENSG00000154783	ENSG00000154783.11	FGD5	14810853	14934571	1	mRNA	FYVE, RhoGEF and PH domain containing 5 [Source:HGNC Symbol;Acc:HGNC:19117]	53.7425	0.5406805	0.31275	0.007154715	0.03045581	51	32	74	19	88	76	52	46	46.13424	24.74902	70.12958	19.08495	87.78864	77.8749	54.47756	49.33111	Up Regulated
ENSG00000279465	ENSG00000279465.1		15731877	15732536	1	lncRNA	TEC	66.85743	0.7975107	0.3597064	0.001473224	0.008633622	28	29	87	78	113	92	102	99	25.3286	22.4288	82.44964	78.34876	112.7286	94.26961	106.8598	106.1691	Up Regulated
ENSG00000270409	ENSG00000270409.1		15732252	15733404	1	mRNA	chromosome 9 open reading frame 64 (C9orf64) pseudogene	320.1997	0.8726369	0.3766077	0.0010587	0.006653563	103	121	354	419	386	453	501	602	93.17308	93.58224	335.4847	420.8735	385.0729	464.1754	524.8703	645.5941	Up Regulated
ENSG00000279465	ENSG00000279465.1		15731877	15732536	1	lncRNA	TEC	66.85743	0.7975107	0.3597064	0.001473224	0.008633622	28	29	87	78	113	92	102	99	25.3286	22.4288	82.44964	78.34876	112.7286	94.26961	106.8598	106.1691	Up Regulated
ENSG00000206560	ENSG00000206560.11	ANKRD28	15667236	15859771	-1	mRNA	ankyrin repeat domain 28 [Source:HGNC Symbol;Acc:HGNC:29024]	7994.192	0.5114653	0.09875581	3.533975e-08	1.396539e-06	4473	4100	5015	5685	5601	6195	6683	6286	4046.244	3170.969	4752.7	5710.419	5587.548	6347.829	7001.414	6741.203	Up Regulated
ENSG00000272477	ENSG00000272477.1		18408680	18409635	-1	lncRNA	novel transcript, sense intronic to SATB1	65.58974	-0.8301323	0.2619953	0.000102521	0.00102229	193	285	128	103	57	78	84	89	174.5864	220.421	121.3052	103.4605	56.8631	79.92424	88.00221	95.44497	Down Regulated
ENSG00000182568	ENSG00000182568.17	SATB1	18345377	18445621	-1	mRNA	SATB homeobox 1 [Source:HGNC Symbol;Acc:HGNC:10541]	6695.567	-0.3001153	0.05775494	7.836156e-08	2.697763e-06	12624	15275	9014	10765	8437	8273	8417	8067	11419.58	11813.79	8542.541	10813.13	8416.736	8477.093	8818.031	8651.175	Down Regulated
ENSG00000228956	ENSG00000228956.8	SATB1-AS1	18445024	18923280	1	lncRNA	SATB1 antisense RNA 1 [Source:HGNC Symbol;Acc:HGNC:50687]	604.7156	-0.5830054	0.1002169	7.71e-10	4.94e-08	1230	1534	1005	1592	767	724	841	739	1112.649	1186.406	952.4355	1599.118	765.1578	741.8609	881.0698	792.515	Down Regulated
ENSG00000182568	ENSG00000182568.17	SATB1	18345377	18445621	-1	mRNA	SATB homeobox 1 [Source:HGNC Symbol;Acc:HGNC:10541]	6695.567	-0.3001153	0.05775494	7.836156e-08	2.697763e-06	12624	15275	9014	10765	8437	8273	8417	8067	11419.58	11813.79	8542.541	10813.13	8416.736	8477.093	8818.031	8651.175	Down Regulated
ENSG00000271643	ENSG00000271643.2	PDCD6IP-DT	33793644	33798539	-1	lncRNA	PDCD6IP divergent transcript [Source:HGNC Symbol;Acc:HGNC:55244]	155.0095	-0.3687909	0.1730486	0.007194935	0.03057396	135	111	77	57	64	57	53	65	122.1201	85.84817	72.97267	57.25486	63.84629	58.40617	55.5252	69.707	Down Regulated
ENSG00000170248	ENSG00000170248.15	PDCD6IP	33798571	33869707	1	mRNA	programmed cell death 6 interacting protein [Source:HGNC Symbol;Acc:HGNC:8766]	5167.526	-0.1444079	0.0468446	0.00159381	0.009191784	4962	6087	4880	4073	3856	4006	4051	3698	4488.59	4707.728	4624.761	4091.212	3846.739	4104.827	4244.011	3965.792	Down Regulated
ENSG00000284669	ENSG00000284669.1		39148281	39172952	1	lncRNA	novel transcript, antisense CSRNP1	545.0125	2.953226	0.1895901	4.46e-56	1.29e-52	145	101	137	149	960	932	907	907	131.166	78.1141	129.8345	149.6662	957.6943	954.9922	950.2143	972.6808	Up Regulated
ENSG00000144655	ENSG00000144655.15	CSRNP1	39141855	39154562	-1	mRNA	cysteine and serine rich nuclear protein 1 [Source:HGNC Symbol;Acc:HGNC:14300]	1535.78	1.516688	0.2169383	1.51418e-13	2.023423e-11	724	403	481	594	1511	1494	1444	1361	654.9253	311.683	455.8422	596.656	1507.371	1530.857	1512.8	1459.557	Up Regulated
ENSG00000223552	ENSG00000223552.1	CCR5AS	46364391	46407117	-1	lncRNA	CCR5 antisense RNA [Source:HGNC Symbol;Acc:HGNC:54398]	36.45562	0.5068864	0.2448126	0.004398071	0.02081884	35	54	41	18	38	57	53	52	31.66075	41.76398	38.85558	18.08048	37.90873	58.40617	55.5252	55.7656	Up Regulated
ENSG00000121797	ENSG00000121797.10	CCRL2	46407166	46412997	1	mRNA	C-C motif chemokine receptor like 2 [Source:HGNC Symbol;Acc:HGNC:1612]	309.3253	1.877849	0.3698201	2.118377e-08	9.058627e-07	6	13	20	5	33	33	52	36	5.427558	10.05429	18.95394	5.022357	32.92074	33.8141	54.47756	38.60695	Up Regulated
ENSG00000227398	ENSG00000227398.3	KIF9-AS1	47164186	47246601	1	lncRNA	KIF9 antisense RNA 1 [Source:HGNC Symbol;Acc:HGNC:26822]	71.36775	0.9743593	0.2741591	2.27e-05	0.000295717	40	44	52	73	101	81	110	104	36.18372	34.02991	49.28024	73.32641	100.7574	82.99825	115.241	111.5312	Up Regulated
ENSG00000088727	ENSG00000088727.12	KIF9	47227998	47283451	-1	mRNA	kinesin family member 9 [Source:HGNC Symbol;Acc:HGNC:16666]	487.9239	0.3276658	0.1541728	0.009072324	0.03669481	486	342	544	548	573	573	521	587	439.6322	264.5052	515.5472	550.4503	571.6238	587.1358	545.8232	629.5078	Up Regulated
ENSG00000240549	ENSG00000240549.2	THOC7-AS1	63860645	63861819	1	lncRNA	THOC7 antisense RNA 1 [Source:HGNC Symbol;Acc:HGNC:41249]	17.07294	-0.7463871	0.3023399	0.000897575	0.005828501	24	52	43	41	15	13	18	27	21.71023	40.21716	40.75097	41.18332	14.96397	13.32071	18.85762	28.95522	Down Regulated
ENSG00000163634	ENSG00000163634.12	THOC7	63833870	63863868	-1	mRNA	THO complex subunit 7 [Source:HGNC Symbol;Acc:HGNC:29874]	444.3195	-0.3424686	0.1008303	0.0002008407	0.001765243	382	548	361	375	255	327	290	240	345.5545	423.827	342.1186	376.6767	254.3875	335.067	303.8172	257.3797	Down Regulated
ENSG00000270562	ENSG00000270562.1	FOXP1-DT	71584943	71587409	1	lncRNA	FOXP1 divergent transcript [Source:HGNC Symbol;Acc:HGNC:56284]	464.2725	0.3516107	0.130116	0.001802903	0.01016956	433	602	538	596	570	600	638	697	391.6888	465.591	509.861	598.6649	568.631	614.8018	668.3977	747.4735	Up Regulated
ENSG00000114861	ENSG00000114861.20	FOXP1	70954693	71583978	-1	mRNA	forkhead box P1 [Source:HGNC Symbol;Acc:HGNC:3823]	2866.904	0.2459942	0.09121332	0.003307161	0.01656598	3597	4441	4539	4466	4371	4385	4585	4690	3253.821	3434.7	4301.597	4485.969	4360.502	4493.177	4803.454	5029.628	Up Regulated
ENSG00000241163	ENSG00000241163.7	LINC00877	71943592	72279503	-1	lncRNA	long intergenic non-protein coding RNA 877 [Source:HGNC Symbol;Acc:HGNC:27706]	152.993	2.352396	0.248509	1.5e-22	4.82e-20	46	30	36	34	173	182	143	179	41.61128	23.20221	34.11709	34.15202	172.5845	186.4899	149.8133	191.9624	Up Regulated
ENSG00000242609	ENSG00000242609.1	CCDC137P	72086888	72087725	1	mRNA	coiled-coil domain containing 137 pseudogene [Source:HGNC Symbol;Acc:HGNC:33459]	14.72756	0.5952319	0.4079403	0.008980207	0.03640111	12	8	19	19	25	23	25	23	10.85512	6.187256	18.00624	19.08495	24.93996	23.5674	26.19113	24.66555	Up Regulated
ENSG00000250592	ENSG00000250592.1		130899414	130929976	-1	lncRNA	novel transcript, antisense to ATP2C1	19.47454	0.787291	0.2883204	0.000424286	0.003220513	19	12	33	24	36	28	43	42	17.18727	9.280884	31.274	24.10731	35.91354	28.69075	45.04875	45.04145	Up Regulated
ENSG00000251579	ENSG00000251579.1		130927754	130928276	-1	mRNA	pseudogene similar to part of makorin ring finger protein 1	16.88801	1.142404	0.3192562	2.061641e-05	0.000273521	14	12	21	16	36	39	30	30	12.6643	9.280884	19.90164	16.07154	35.91354	39.96212	31.42936	32.17246	Up Regulated
ENSG00000250592	ENSG00000250592.1		130899414	130929976	-1	lncRNA	novel transcript, antisense to ATP2C1	19.47454	0.787291	0.2883204	0.000424286	0.003220513	19	12	33	24	36	28	43	42	17.18727	9.280884	31.274	24.10731	35.91354	28.69075	45.04875	45.04145	Up Regulated
ENSG00000249098	ENSG00000249098.1		130918226	130919120	-1	mRNA	cysteine and glycine-rich protein 2 pseudogene	24.15915	1.24692	0.2682197	1.940928e-07	5.713641e-06	17	18	42	21	50	63	46	60	15.37808	13.92133	39.80327	21.0939	49.87991	64.55419	48.19169	64.34492	Up Regulated
ENSG00000240888	ENSG00000240888.1		143313067	143314429	-1	lncRNA	novel transcript	16.94369	0.7277525	0.4221794	0.004614877	0.02157362	7	5	22	3	14	16	18	18	6.332151	3.867035	20.84933	3.013414	13.96638	16.39472	18.85762	19.30348	Up Regulated
ENSG00000181804	ENSG00000181804.15	SLC9A9	143265222	143848485	-1	mRNA	solute carrier family 9 member A9 [Source:HGNC Symbol;Acc:HGNC:20653]	734.1353	0.3649263	0.1943426	0.01228703	0.04651895	307	331	451	90	361	384	363	309	277.71	255.9977	427.4113	90.40242	360.133	393.4732	380.2953	331.3764	Up Regulated
ENSG00000272087	ENSG00000272087.1		158693120	158693768	-1	lncRNA	novel transcript	24.14032	-0.4653536	0.288119	0.01193749	0.0454753	26	34	30	29	17	16	12	20	23.51942	26.29584	28.43091	29.12967	16.95917	16.39472	12.57174	21.44831	Down Regulated
ENSG00000168827	ENSG00000168827.14	GFM1	158644527	158695581	1	mRNA	G elongation factor mitochondrial 1 [Source:HGNC Symbol;Acc:HGNC:13780]	1590.093	-0.3330794	0.0757463	3.516065e-06	6.264764e-05	1299	1627	1346	1383	979	953	1003	927	1175.066	1258.333	1275.6	1389.184	976.6487	976.5103	1050.788	994.1291	Down Regulated
ENSG00000244040	ENSG00000244040.6	IL12A-AS1	159902045	160225299	-1	lncRNA	IL12A antisense RNA 1 [Source:HGNC Symbol;Acc:HGNC:49094]	106.4545	-1.00657	0.20462	6.11e-08	2.19e-06	193	135	61	76	58	43	43	46	174.5864	104.4099	57.80952	76.33982	57.8607	44.0608	45.04875	49.33111	Down Regulated
ENSG00000180044	ENSG00000180044.5	C3orf80	160225422	160228213	1	mRNA	chromosome 3 open reading frame 80 [Source:HGNC Symbol;Acc:HGNC:40048]	466.4023	-0.761965	0.1917887	5.868427e-06	9.551241e-05	745	507	235	205	264	223	189	137	673.9218	392.1173	222.7088	205.9166	263.3659	228.5013	198.005	146.9209	Down Regulated
ENSG00000244040	ENSG00000244040.6	IL12A-AS1	159902045	160225299	-1	lncRNA	IL12A antisense RNA 1 [Source:HGNC Symbol;Acc:HGNC:49094]	106.4545	-1.00657	0.20462	6.11e-08	2.19e-06	193	135	61	76	58	43	43	46	174.5864	104.4099	57.80952	76.33982	57.8607	44.0608	45.04875	49.33111	Down Regulated
ENSG00000184100	ENSG00000184100.6	BRD7P2	160100850	160102793	1	mRNA	bromodomain containing 7 pseudogene 2 [Source:HGNC Symbol;Acc:HGNC:33541]	908.0925	-0.2130126	0.07272244	0.001930874	0.0107747	961	1085	907	824	658	683	784	674	869.3138	839.1466	859.5612	827.6844	656.4196	699.8494	821.354	722.808	Down Regulated
ENSG00000228804	ENSG00000228804.5		187702313	187733849	1	lncRNA	novel transcript, antisense to RTP2 and BCL6	37.0484	1.822921	0.2700068	9.61e-13	1.13e-10	7	17	22	16	47	42	46	66	6.332151	13.14792	20.84933	16.07154	46.88712	43.03613	48.19169	70.77942	Up Regulated
ENSG00000113916	ENSG00000113916.18	BCL6	187721377	187745725	-1	mRNA	BCL6 transcription repressor [Source:HGNC Symbol;Acc:HGNC:1001]	4037.538	0.8644178	0.1143688	3.393782e-15	5.891837e-13	1768	2101	2173	1906	3303	3377	3104	3113	1599.32	1624.928	2059.346	1914.522	3295.067	3460.31	3251.891	3338.429	Up Regulated
ENSG00000285454	ENSG00000285454.1		42151028	42268110	1	lncRNA	novel transcript	17.03214	-1.506549	0.3683697	2.19e-06	4.26e-05	45	68	10	94	19	11	15	15	40.70668	52.59167	9.47697	94.4203	18.95437	11.27137	15.71468	16.08623	Down Regulated
ENSG00000188848	ENSG00000188848.16	BEND4	42110853	42152878	-1	mRNA	BEN domain containing 4 [Source:HGNC Symbol;Acc:HGNC:23815]	409.5227	-1.548448	0.1888286	1.337295e-17	2.984959e-15	1341	1748	324	1114	306	298	338	336	1213.059	1351.915	307.0538	1118.981	305.2651	305.3516	354.1041	360.3316	Down Regulated
ENSG00000273369	ENSG00000273369.1		44693946	44694386	-1	lncRNA	novel transcript, antisense to GUF1	31.9657	-0.472474	0.2532014	0.007258926	0.03077506	35	51	39	45	20	27	27	21	31.66075	39.44376	36.96018	45.20121	19.95196	27.66608	28.28642	22.52072	Down Regulated
ENSG00000163281	ENSG00000163281.11	GNPDA2	44682200	44726588	-1	mRNA	glucosamine-6-phosphate deaminase 2 [Source:HGNC Symbol;Acc:HGNC:21526]	584.2384	-0.4648706	0.103061	1.16749e-06	2.506699e-05	636	657	564	558	377	368	391	357	575.3211	508.1284	534.5011	560.495	376.0945	377.0785	409.6293	382.8523	Down Regulated
ENSG00000273369	ENSG00000273369.1		44693946	44694386	-1	lncRNA	novel transcript, antisense to GUF1	31.9657	-0.472474	0.2532014	0.007258926	0.03077506	35	51	39	45	20	27	27	21	31.66075	39.44376	36.96018	45.20121	19.95196	27.66608	28.28642	22.52072	Down Regulated
ENSG00000151806	ENSG00000151806.14	GUF1	44678420	44700928	1	mRNA	GTP binding elongation factor GUF1 [Source:HGNC Symbol;Acc:HGNC:25799]	1237.321	-0.2886077	0.079603	0.0001131119	0.00110405	1235	1555	1213	1173	863	896	967	899	1117.172	1202.648	1149.556	1178.245	860.9273	918.1041	1013.073	964.1014	Down Regulated
ENSG00000269506	ENSG00000269506.2		54059597	54061210	1	lncRNA	novel transcript, antisense to CHIC2	194.4724	0.4359765	0.1570672	0.000966428	0.006182701	212	183	200	160	188	229	255	262	191.7737	141.5335	189.5394	160.7154	187.5485	234.6494	267.1496	280.9728	Up Regulated
ENSG00000109220	ENSG00000109220.11	CHIC2	54009789	54064605	-1	mRNA	cysteine rich hydrophobic domain 2 [Source:HGNC Symbol;Acc:HGNC:1935]	382.843	0.2141653	0.09087715	0.01009065	0.03991457	329	332	330	259	327	336	326	296	297.6111	256.7711	312.74	260.1581	326.2146	344.289	341.5324	317.435	Up Regulated
ENSG00000286035	ENSG00000286035.1		83075957	83085600	1	lncRNA	novel transcript	18.65939	-0.6956608	0.4303796	0.005359208	0.02426036	89	138	45	35	40	22	37	29	80.50877	106.7302	42.64636	35.1565	39.90393	22.54273	38.76288	31.10005	Down Regulated
ENSG00000138663	ENSG00000138663.9	COPS4	83034447	83075818	1	mRNA	COP9 signalosome subunit 4 [Source:HGNC Symbol;Acc:HGNC:16702]	529.5356	-0.3176857	0.09541997	0.0002913116	0.002393658	457	638	412	329	296	336	314	296	413.399	493.4337	390.4512	330.4711	295.2891	344.289	328.9606	317.435	Down Regulated
ENSG00000284968	ENSG00000284968.1		86924630	86936202	-1	lncRNA	Novel transcript, antisense to AFF1	85.67573	-0.4667398	0.160253	0.000529528	0.003844092	96	135	155	107	65	71	63	96	86.84092	104.4099	146.893	107.4784	64.84388	72.75155	66.00166	102.9519	Down Regulated
ENSG00000172493	ENSG00000172493.20	AFF1	86935002	87141039	1	mRNA	ALF transcription elongation factor 1 [Source:HGNC Symbol;Acc:HGNC:7135]	3955.338	0.1332958	0.04842043	0.004765624	0.02212557	5199	6510	5234	5030	5456	5092	5106	5356	4702.979	5034.879	4960.246	5052.491	5442.896	5217.618	5349.277	5743.857	Up Regulated
ENSG00000248019	ENSG00000248019.2	FAM13A-AS1	88709298	88730103	1	lncRNA	FAM13A antisense RNA 1 [Source:HGNC Symbol;Acc:HGNC:19370]	163.3744	0.290564	0.1366656	0.01132431	0.04360961	206	230	245	254	270	245	250	280	186.3462	177.8836	232.1858	255.1357	269.3515	251.0441	261.9113	300.2763	Up Regulated
ENSG00000138640	ENSG00000138640.15	FAM13A	88725955	89111398	-1	mRNA	family with sequence similarity 13 member A [Source:HGNC Symbol;Acc:HGNC:19367]	288.8585	0.6321802	0.1324923	2.027494e-07	5.900065e-06	185	243	306	238	333	357	330	340	167.3497	187.9379	289.9953	239.0642	332.2002	365.8071	345.723	364.6212	Up Regulated
ENSG00000260651	ENSG00000260651.1		102500841	102501319	-1	lncRNA	novel transcript, antisense NFKB1	16.56053	3.362793	0.5019448	5.24e-12	5.49e-10	4	4	1	1	29	22	31	17	3.618372	3.093628	0.947697	1.004471	28.93035	22.54273	32.47701	18.23106	Up Regulated
ENSG00000109320	ENSG00000109320.12	NFKB1	102501330	102617302	1	mRNA	nuclear factor kappa B subunit 1 [Source:HGNC Symbol;Acc:HGNC:7794]	2365.254	1.052651	0.1525725	3.615812e-13	4.533603e-11	1346	1462	1254	1505	2400	2474	2746	2757	1217.582	1130.721	1188.412	1511.729	2394.236	2535.033	2876.834	2956.649	Up Regulated
ENSG00000286136	ENSG00000286136.1		108669949	108678874	1	lncRNA	novel transcript	27.10247	-0.559417	0.2882296	0.004966098	0.02288371	27	27	25	27	14	13	19	9	24.42401	20.88199	23.69242	27.12073	13.96638	13.32071	19.90526	9.651739	Down Regulated
ENSG00000198856	ENSG00000198856.13	OSTC	108650585	108667820	1	mRNA	oligosaccharyltransferase complex non-catalytic subunit [Source:HGNC Symbol;Acc:HGNC:24448]	1838.507	-0.4373896	0.08558724	6.635238e-08	2.347996e-06	1055	1288	916	994	658	704	704	619	954.3456	996.1482	868.0904	998.4445	656.4196	721.3675	737.5423	663.8251	Down Regulated
ENSG00000248335	ENSG00000248335.1		140712168	140716081	1	lncRNA	novel transcript	18.13769	1.481606	0.4321962	3.07e-05	0.000379433	11	3	12	5	24	12	22	30	9.950523	2.320221	11.37236	5.022357	23.94236	12.29604	23.0482	32.17246	Up Regulated
ENSG00000109436	ENSG00000109436.8	TBC1D9	140620782	140756385	-1	mRNA	TBC1 domain family member 9 [Source:HGNC Symbol;Acc:HGNC:21710]	851.1456	0.3082329	0.07810982	2.866751e-05	0.0003598853	536	528	514	359	540	568	526	479	484.8618	408.3589	487.1162	360.6052	538.703	582.0124	551.0615	513.687	Up Regulated
ENSG00000273472	ENSG00000273472.1		140756410	140757927	1	lncRNA	novel transcript	45.4456	0.5324232	0.2665634	0.004611115	0.02156978	43	31	36	11	59	45	42	25	38.8975	23.97562	34.11709	11.04918	58.85829	46.11014	44.00111	26.81038	Up Regulated
ENSG00000109436	ENSG00000109436.8	TBC1D9	140620782	140756385	-1	mRNA	TBC1 domain family member 9 [Source:HGNC Symbol;Acc:HGNC:21710]	851.1456	0.3082329	0.07810982	2.866751e-05	0.0003598853	536	528	514	359	540	568	526	479	484.8618	408.3589	487.1162	360.6052	538.703	582.0124	551.0615	513.687	Up Regulated
ENSG00000248206	ENSG00000248206.1		183987669	183996680	1	lncRNA	novel transcript	66.46356	0.4403904	0.1953389	0.003761809	0.01838101	66	52	43	51	77	65	63	65	59.70314	40.21716	40.75097	51.22804	76.81506	66.60353	66.00166	69.707	Up Regulated
ENSG00000173320	ENSG00000173320.12	STOX2	183797692	184023526	1	mRNA	storkhead box 2 [Source:HGNC Symbol;Acc:HGNC:25450]	390.5937	0.592346	0.1583081	2.097744e-05	0.0002775854	298	287	331	242	368	406	415	402	269.5687	221.9678	313.6877	243.0821	367.1161	416.0159	434.7728	431.111	Up Regulated
ENSG00000283355	ENSG00000283355.1		184014035	184016382	1	lncRNA	TEC	34.28167	0.6851046	0.3335072	0.00258088	0.01358456	13	15	40	43	43	52	46	44	11.75971	11.6011	37.90788	43.19227	42.89672	53.28283	48.19169	47.18628	Up Regulated
ENSG00000173320	ENSG00000173320.12	STOX2	183797692	184023526	1	mRNA	storkhead box 2 [Source:HGNC Symbol;Acc:HGNC:25450]	390.5937	0.592346	0.1583081	2.097744e-05	0.0002775854	298	287	331	242	368	406	415	402	269.5687	221.9678	313.6877	243.0821	367.1161	416.0159	434.7728	431.111	Up Regulated
ENSG00000260774	ENSG00000260774.1		213898	217279	-1	lncRNA	novel transcript	15.83386	-0.6641362	0.3292931	0.003110592	0.01574834	24	56	32	35	23	14	10	22	21.71023	43.31079	30.3263	35.1565	22.94476	14.34538	10.47645	23.59314	Down Regulated
ENSG00000164366	ENSG00000164366.3	CCDC127	196868	218153	-1	mRNA	coiled-coil domain containing 127 [Source:HGNC Symbol;Acc:HGNC:30520]	378.7259	-0.3002708	0.08975302	0.0003013873	0.002467464	549	706	436	383	374	368	340	343	496.6215	546.0253	413.1959	384.7125	373.1017	377.0785	356.1994	367.8385	Down Regulated
ENSG00000251141	ENSG00000251141.5	MRPS30-DT	44742420	44808777	-1	lncRNA	MRPS30 divergent transcript [Source:HGNC Symbol;Acc:HGNC:53420]	69.11777	-0.3850791	0.1344449	0.000936291	0.006029643	198	230	182	190	130	112	148	123	179.1094	177.8836	172.4809	190.8495	129.6878	114.763	155.0515	131.9071	Down Regulated
ENSG00000112996	ENSG00000112996.11	MRPS30	44808947	44820428	1	mRNA	mitochondrial ribosomal protein S30 [Source:HGNC Symbol;Acc:HGNC:8769]	2456.776	-0.3367367	0.06363235	3.896629e-08	1.513353e-06	3656	4982	3646	4133	2830	2825	2920	2629	3307.192	3853.114	3455.303	4151.48	2823.203	2894.692	3059.124	2819.38	Down Regulated
ENSG00000271828	ENSG00000271828.1		56927874	56929573	1	lncRNA	novel transcript, antisense to MIER3	29.82603	-0.6124188	0.2258775	0.000679077	0.004653614	42	54	37	39	21	26	22	21	37.9929	41.76398	35.06479	39.17438	20.94956	26.64141	23.0482	22.52072	Down Regulated
ENSG00000155545	ENSG00000155545.19	MIER3	56919602	56971675	-1	mRNA	MIER family member 3 [Source:HGNC Symbol;Acc:HGNC:26678]	693.4795	-0.3880461	0.09643882	1.391579e-05	0.0001965244	679	748	506	631	367	420	464	417	614.2186	578.5084	479.5347	633.8214	366.1185	430.3613	486.1075	447.1972	Down Regulated
ENSG00000271828	ENSG00000271828.1		56927874	56929573	1	lncRNA	novel transcript, antisense to MIER3	29.82603	-0.6124188	0.2258775	0.000679077	0.004653614	42	54	37	39	21	26	22	21	37.9929	41.76398	35.06479	39.17438	20.94956	26.64141	23.0482	22.52072	Down Regulated
ENSG00000155542	ENSG00000155542.11	SETD9	56909260	56925532	1	mRNA	SET domain containing 9 [Source:HGNC Symbol;Acc:HGNC:28508]	92.58078	-0.5728996	0.1457219	7.388493e-06	0.0001160673	121	149	127	128	86	75	68	65	109.4557	115.2376	120.3575	128.5723	85.79345	76.85023	71.23989	69.707	Down Regulated
ENSG00000152931	ENSG00000152931.7	PART1	60487713	60548813	1	lncRNA	prostate androgen-regulated transcript 1 [Source:HGNC Symbol;Acc:HGNC:17263]	111.0721	0.5451475	0.2386626	0.002289274	0.01236038	57	49	86	80	90	88	103	105	51.5618	37.89694	81.50194	80.3577	89.78384	90.17094	107.9075	112.6036	Up Regulated
ENSG00000113448	ENSG00000113448.19	PDE4D	58969038	60522120	-1	mRNA	phosphodiesterase 4D [Source:HGNC Symbol;Acc:HGNC:8783]	888.9899	0.447671	0.1442122	0.0003331837	0.002672838	471	728	1057	732	830	889	1043	969	426.0633	563.0403	1001.716	735.273	828.0065	910.9314	1092.694	1039.171	Up Regulated
ENSG00000269961	ENSG00000269961.1	ERBIN-DT	65924629	65925135	-1	lncRNA	ERBIN divergent transcript [Source:HGNC Symbol;Acc:HGNC:55270]	29.30886	0.7803082	0.2423545	0.000102313	0.001020716	22	32	22	14	35	49	30	31	19.90105	24.74902	20.84933	14.0626	34.91594	50.20882	31.42936	33.24488	Up Regulated
ENSG00000112851	ENSG00000112851.14	ERBIN	65883128	66082546	1	mRNA	erbb2 interacting protein [Source:HGNC Symbol;Acc:HGNC:15842]	7117.984	-0.3182806	0.0857564	6.936444e-05	0.0007450717	6402	7377	5860	6045	4160	4384	4724	4354	5791.204	5705.423	5553.504	6072.029	4150.009	4492.152	4949.077	4669.297	Down Regulated
ENSG00000280187	ENSG00000280187.1		69186359	69189511	-1	lncRNA	TEC	171.2447	-0.3284627	0.1174712	0.001550322	0.008984349	197	180	179	159	117	134	112	119	178.2048	139.2133	169.6378	159.7109	116.719	137.3057	117.3363	127.6174	Down Regulated
ENSG00000153044	ENSG00000153044.10	CENPH	69189574	69210357	1	mRNA	centromere protein H [Source:HGNC Symbol;Acc:HGNC:17268]	210.6308	-0.5417091	0.1194004	8.047155e-07	1.849025e-05	401	408	289	265	206	184	197	202	362.7418	315.55	273.8844	266.1849	205.5052	188.5392	206.3861	216.6279	Down Regulated
ENSG00000247828	ENSG00000247828.7	TMEM161B-DT	88268864	88439337	1	lncRNA	TMEM161B divergent transcript [Source:HGNC Symbol;Acc:HGNC:43839]	596.3618	-0.2638947	0.09977232	0.003432529	0.01705693	712	849	815	998	562	539	656	657	644.0702	656.6225	772.373	1002.462	560.6502	552.297	687.2554	704.5769	Down Regulated
ENSG00000164180	ENSG00000164180.13	TMEM161B	88189633	88269476	-1	mRNA	transmembrane protein 161B [Source:HGNC Symbol;Acc:HGNC:28483]	1143.896	-0.2664617	0.08227386	0.0005196488	0.003792708	1341	1478	1310	1430	939	1014	1029	998	1213.059	1143.096	1241.483	1436.394	936.7447	1039.015	1078.027	1070.271	Down Regulated
ENSG00000281357	ENSG00000281357.2	ARRDC3-AS1	91380349	91616105	1	lncRNA	ARRDC3 antisense RNA 1 [Source:HGNC Symbol;Acc:HGNC:44145]	160.9846	0.5002905	0.1157675	2.45e-06	4.65e-05	114	136	148	128	172	172	161	161	103.1236	105.1833	140.2592	128.5723	171.5869	176.2432	168.6709	172.6589	Up Regulated
ENSG00000113369	ENSG00000113369.9	ARRDC3	91368631	91383317	-1	mRNA	arrestin domain containing 3 [Source:HGNC Symbol;Acc:HGNC:29263]	7575.342	0.6654895	0.1512783	1.106007e-06	2.405269e-05	1749	2279	2306	906	2461	2644	2698	2437	1582.133	1762.595	2185.389	910.051	2455.089	2709.227	2826.547	2613.476	Up Regulated
ENSG00000237187	ENSG00000237187.8	NR2F1-AS1	93360779	93585649	-1	lncRNA	NR2F1 antisense RNA 1 [Source:HGNC Symbol;Acc:HGNC:48622]	67.44204	-0.5353766	0.2257407	0.001773169	0.01002989	94	77	46	58	36	31	42	41	85.03174	59.55234	43.59406	58.25934	35.91354	31.76476	44.00111	43.96903	Down Regulated
ENSG00000175745	ENSG00000175745.13	NR2F1	93583222	93594611	1	mRNA	nuclear receptor subfamily 2 group F member 1 [Source:HGNC Symbol;Acc:HGNC:7975]	137.35	-0.6659252	0.1555678	1.889881e-06	3.75977e-05	247	232	106	234	120	113	113	87	223.4345	179.4304	100.4559	235.0463	119.7118	115.7877	118.3839	93.30014	Down Regulated
ENSG00000270133	ENSG00000270133.1		94611906	94618122	-1	lncRNA	novel transcript, sense intronic to C5orf36	22.63959	-0.9720487	0.3371024	0.000215774	0.001874594	51	39	60	59	20	15	21	27	46.13424	30.16287	56.86182	59.26381	19.95196	15.37005	22.00055	28.95522	Down Regulated
ENSG00000133302	ENSG00000133302.13	SLF1	94618669	94739436	1	mRNA	SMC5-SMC6 complex localization factor 1 [Source:HGNC Symbol;Acc:HGNC:25408]	578.0912	-0.3305292	0.1081731	0.0006773102	0.004647812	766	925	828	846	533	554	594	595	692.9182	715.4015	784.6931	849.7827	531.7199	567.667	622.3013	638.0872	Down Regulated
ENSG00000250240	ENSG00000250240.5		95701249	95732295	-1	lncRNA	novel transcript	48.3962	-1.174686	0.222799	9.68e-09	4.62e-07	85	101	42	41	26	22	22	27	76.8904	78.1141	39.80327	41.18332	25.93755	22.54273	23.0482	28.95522	Down Regulated
ENSG00000164292	ENSG00000164292.13	RHOBTB3	95713522	95824383	1	mRNA	Rho related BTB domain containing 3 [Source:HGNC Symbol;Acc:HGNC:18757]	2570.524	-1.037004	0.1282589	4.436802e-17	9.587269e-15	2455	2543	949	1614	787	801	767	745	2220.776	1966.774	899.3644	1621.217	785.1098	820.7605	803.544	798.9495	Down Regulated
ENSG00000250240	ENSG00000250240.5		95701249	95732295	-1	lncRNA	novel transcript	48.3962	-1.174686	0.222799	9.68e-09	4.62e-07	85	101	42	41	26	22	22	27	76.8904	78.1141	39.80327	41.18332	25.93755	22.54273	23.0482	28.95522	Down Regulated
ENSG00000145757	ENSG00000145757.16	SPATA9	95652181	95698711	-1	mRNA	spermatogenesis associated 9 [Source:HGNC Symbol;Acc:HGNC:22988]	112.7104	-0.6530902	0.1695177	8.005008e-06	0.0001239567	155	151	80	92	63	58	72	55	140.2119	116.7845	75.81576	92.41136	62.84869	59.43084	75.43047	58.98285	Down Regulated
ENSG00000251513	ENSG00000251513.2	LIX1-AS1	97089075	97437217	1	lncRNA	LIX1 and RIOK2 antisense RNA 1 [Source:HGNC Symbol;Acc:HGNC:52976]	15.5142	-0.5572946	0.4343424	0.01228644	0.04651895	21	18	14	36	21	5	9	7	18.99645	13.92133	13.26776	36.16097	20.94956	5.123349	9.428808	7.506908	Down Regulated
ENSG00000058729	ENSG00000058729.11	RIOK2	97160867	97183247	-1	mRNA	RIO kinase 2 [Source:HGNC Symbol;Acc:HGNC:18999]	749.8427	-0.4328149	0.09765145	1.898461e-06	3.773145e-05	602	745	641	663	391	438	438	412	544.565	576.1882	607.4738	665.9645	390.0609	448.8053	458.8687	441.8351	Down Regulated
ENSG00000251513	ENSG00000251513.2	LIX1-AS1	97089075	97437217	1	lncRNA	LIX1 and RIOK2 antisense RNA 1 [Source:HGNC Symbol;Acc:HGNC:52976]	15.5142	-0.5572946	0.4343424	0.01228644	0.04651895	21	18	14	36	21	5	9	7	18.99645	13.92133	13.26776	36.16097	20.94956	5.123349	9.428808	7.506908	Down Regulated
ENSG00000145721	ENSG00000145721.12	LIX1	97091867	97142753	-1	mRNA	limb and CNS expressed 1 [Source:HGNC Symbol;Acc:HGNC:18581]	16.49664	-0.7802353	0.4089151	0.002839937	0.0146706	51	20	17	81	16	15	20	22	46.13424	15.46814	16.11085	81.36218	15.96157	15.37005	20.95291	23.59314	Down Regulated
ENSG00000246859	ENSG00000246859.2	STARD4-AS1	111510396	111739726	1	lncRNA	STARD4 antisense RNA 1 [Source:HGNC Symbol;Acc:HGNC:44117]	965.6223	-0.4828678	0.1654441	0.00051466	0.003763058	2110	1819	1392	1612	1150	1023	1009	932	1908.691	1406.827	1319.194	1619.208	1147.238	1048.237	1057.074	999.4911	Down Regulated
ENSG00000134986	ENSG00000134986.13	NREP	111662621	111997464	-1	mRNA	neuronal regeneration related protein [Source:HGNC Symbol;Acc:HGNC:16834]	2834.748	-0.7058199	0.1590745	8.454495e-07	1.920892e-05	7040	5896	3457	4062	3008	2799	2518	2123	6368.334	4560.008	3276.188	4080.162	3000.775	2868.051	2637.971	2276.738	Down Regulated
ENSG00000246859	ENSG00000246859.2	STARD4-AS1	111510396	111739726	1	lncRNA	STARD4 antisense RNA 1 [Source:HGNC Symbol;Acc:HGNC:44117]	965.6223	-0.4828678	0.1654441	0.00051466	0.003763058	2110	1819	1392	1612	1150	1023	1009	932	1908.691	1406.827	1319.194	1619.208	1147.238	1048.237	1057.074	999.4911	Down Regulated
ENSG00000164211	ENSG00000164211.13	STARD4	111496033	111512590	-1	mRNA	StAR related lipid transfer domain containing 4 [Source:HGNC Symbol;Acc:HGNC:18058]	2910.782	-0.5707694	0.1405421	6.068963e-06	9.823101e-05	2484	3530	1994	2602	1482	1602	1476	1400	2247.009	2730.127	1889.708	2613.634	1478.441	1641.521	1546.325	1501.382	Down Regulated
ENSG00000271797	ENSG00000271797.1		115262505	115263448	1	lncRNA	novel transcript, antisense to PGGT1B	34.92069	-0.5133593	0.2513723	0.004595711	0.02151869	63	56	41	22	27	33	23	16	56.98936	43.31079	38.85558	22.09837	26.93515	33.8141	24.09584	17.15865	Down Regulated
ENSG00000164219	ENSG00000164219.10	PGGT1B	115204012	115262877	-1	mRNA	protein geranylgeranyltransferase type I subunit beta [Source:HGNC Symbol;Acc:HGNC:8895]	1541.416	-0.3051448	0.09383015	0.0004029643	0.003100656	1629	1738	1431	1266	966	1031	1109	1068	1473.582	1344.181	1356.154	1271.661	963.6799	1056.434	1161.839	1145.34	Down Regulated
ENSG00000249249	ENSG00000249249.1	TICAM2-AS1	115602057	115623897	1	lncRNA	TICAM2 antisense RNA 1 [Source:HGNC Symbol;Acc:HGNC:55575]	30.17114	-0.5637993	0.3087827	0.005661688	0.02529701	29	35	39	56	24	11	19	28	26.2332	27.06924	36.96018	56.25039	23.94236	11.27137	19.90526	30.02763	Down Regulated
ENSG00000134970	ENSG00000134970.14	TMED7	115613210	115632992	-1	mRNA	transmembrane p24 trafficking protein 7 [Source:HGNC Symbol;Acc:HGNC:24253]	3080.44	-0.3917015	0.09598945	1.07922e-05	0.0001585882	2340	2899	1996	1673	1406	1477	1534	1317	2116.748	2242.107	1891.603	1680.48	1402.623	1513.437	1607.088	1412.371	Down Regulated
ENSG00000197536	ENSG00000197536.11	IRF1-AS1	132410636	132488702	1	lncRNA	IRF1 antisense RNA 1 [Source:HGNC Symbol;Acc:HGNC:33838]	203.7851	0.3469391	0.112364	0.000567781	0.004050852	317	365	364	236	384	369	309	392	286.756	282.2935	344.9617	237.0552	383.0777	378.1031	323.7224	420.3868	Up Regulated
ENSG00000125347	ENSG00000125347.14	IRF1	132440440	132508719	-1	mRNA	interferon regulatory factor 1 [Source:HGNC Symbol;Acc:HGNC:6116]	1067.254	0.4248634	0.1377509	0.0003929774	0.003046625	1037	946	812	826	1137	1178	1081	1012	938.0629	731.643	769.5299	829.6933	1134.269	1207.061	1132.505	1085.284	Up Regulated
ENSG00000281398	ENSG00000281398.4	SNHG4	139274102	139284899	1	lncRNA	small nucleolar RNA host gene 4 [Source:HGNC Symbol;Acc:HGNC:32964]	546.4554	-0.5790689	0.09775063	4.11e-10	2.86e-08	574	592	486	700	356	356	323	324	519.2364	457.8569	460.5807	703.1299	355.145	364.7824	338.3895	347.4626	Down Regulated
ENSG00000200959	ENSG00000200959.1	SNORA74A	139278781	139278978	1	mRNA	small nucleolar RNA, H/ACA box 74A [Source:HGNC Symbol;Acc:HGNC:10119]	1463.62	-0.5382447	0.2059648	0.001020061	0.006458693	2980	2771	1349	887	1648	788	796	1121	2695.687	2143.111	1278.443	890.966	1644.042	807.4397	833.9257	1202.178	Down Regulated
ENSG00000226272	ENSG00000226272.5	ARHGAP26-AS1	142859604	142868922	-1	lncRNA	ARHGAP26 antisense RNA 1 [Source:HGNC Symbol;Acc:HGNC:40792]	112.333	0.9202667	0.2817045	6.6e-05	0.000715438	50	80	188	179	194	222	232	279	45.22965	61.87256	178.167	179.8004	193.5341	227.4767	243.0537	299.2039	Up Regulated
ENSG00000145819	ENSG00000145819.17	ARHGAP26	142770377	143229011	1	mRNA	Rho GTPase activating protein 26 [Source:HGNC Symbol;Acc:HGNC:17073]	4700.929	0.357784	0.07338494	3.152621e-07	8.425795e-06	3638	4118	5024	4074	5071	4703	4616	4809	3290.909	3184.89	4761.23	4092.216	5058.821	4819.022	4835.931	5157.246	Up Regulated
ENSG00000285366	ENSG00000285366.1		142946569	142947105	-1	lncRNA	TEC	83.79612	0.653285	0.1955009	8.73e-05	0.00089883	62	77	140	84	139	124	132	137	56.08476	59.55234	132.6776	84.37559	138.6662	127.059	138.2892	146.9209	Up Regulated
ENSG00000145819	ENSG00000145819.17	ARHGAP26	142770377	143229011	1	mRNA	Rho GTPase activating protein 26 [Source:HGNC Symbol;Acc:HGNC:17073]	4700.929	0.357784	0.07338494	3.152621e-07	8.425795e-06	3638	4118	5024	4074	5071	4703	4616	4809	3290.909	3184.89	4761.23	4092.216	5058.821	4819.022	4835.931	5157.246	Up Regulated
ENSG00000275765	ENSG00000275765.5		151769783	151771508	-1	lncRNA	novel transcript	31.72224	-0.411942	0.2280176	0.01108187	0.04285073	64	57	33	41	25	37	31	22	57.89395	44.0842	31.274	41.18332	24.93996	37.91278	32.47701	23.59314	Down Regulated
ENSG00000145907	ENSG00000145907.15	G3BP1	151771045	151812911	1	mRNA	G3BP stress granule assembly factor 1 [Source:HGNC Symbol;Acc:HGNC:30292]	7708.428	-0.2392962	0.08255938	0.001848411	0.0103945	8357	10200	7472	6986	5743	5912	6174	5995	7559.683	7888.751	7081.192	7017.237	5729.207	6057.847	6468.163	6429.13	Down Regulated
ENSG00000253269	ENSG00000253269.1		169772966	169779365	-1	lncRNA	novel transcript	42.12327	0.4777007	0.2268062	0.004803315	0.0222751	34	48	45	56	68	66	55	55	30.75616	37.12353	42.64636	56.25039	67.83668	67.6282	57.6205	58.98285	Up Regulated
ENSG00000134516	ENSG00000134516.16	DOCK2	169637268	170083382	1	mRNA	dedicator of cytokinesis 2 [Source:HGNC Symbol;Acc:HGNC:2988]	7133.625	0.1105589	0.03897174	0.003944406	0.01909863	5463	7018	6239	5668	5718	5779	5785	5684	4941.791	5427.77	5912.681	5693.343	5704.267	5921.566	6060.628	6095.609	Up Regulated
ENSG00000285865	ENSG00000285865.1		179974584	179980186	1	lncRNA	Novel transcript, antisense to RNF130	89.05824	0.4075948	0.1863402	0.004879513	0.02257823	70	85	132	88	128	116	100	125	63.32151	65.73959	125.096	88.39348	127.6926	118.8617	104.7645	134.0519	Up Regulated
ENSG00000113269	ENSG00000113269.14	RNF130	179911651	180072113	-1	mRNA	ring finger protein 130 [Source:HGNC Symbol;Acc:HGNC:18280]	5571.328	0.2825956	0.06851956	1.542133e-05	0.0002135228	2596	3783	3894	2437	3427	3491	3481	3159	2348.323	2925.799	3690.332	2447.897	3418.769	3577.122	3646.854	3387.76	Up Regulated
ENSG00000225092	ENSG00000225092.2		7183083	7185287	1	lncRNA	novel transcript	133.182	0.3786082	0.1589479	0.003724298	0.01821964	214	236	263	191	280	234	249	316	193.5829	182.524	249.2443	191.854	279.3275	239.7727	260.8637	338.8833	Up Regulated
ENSG00000124782	ENSG00000124782.20	RREB1	7107597	7251980	1	mRNA	ras responsive element binding protein 1 [Source:HGNC Symbol;Acc:HGNC:10449]	3800.833	0.3200456	0.08166667	3.028566e-05	0.0003752057	6130	7106	5434	4985	7123	5893	6025	6904	5545.155	5495.83	5149.785	5007.289	7105.892	6038.379	6312.063	7403.956	Up Regulated
ENSG00000229931	ENSG00000229931.1	ATXN1-AS1	16761138	16763947	1	lncRNA	ATXN1 antisense RNA 1 [Source:HGNC Symbol;Acc:HGNC:40515]	27.11771	0.5369897	0.3074913	0.007129506	0.03038651	13	18	25	19	23	26	32	29	11.75971	13.92133	23.69242	19.08495	22.94476	26.64141	33.52465	31.10005	Up Regulated
ENSG00000124788	ENSG00000124788.18	ATXN1	16299112	16761491	-1	mRNA	ataxin 1 [Source:HGNC Symbol;Acc:HGNC:10548]	1221.526	0.2350223	0.07154335	0.0005246555	0.003821174	1126	1330	1556	1382	1419	1356	1335	1521	1018.572	1028.631	1474.616	1388.179	1415.592	1389.452	1398.607	1631.144	Up Regulated
ENSG00000270362	ENSG00000270362.1	HMGN3-AS1	79233699	79236797	1	lncRNA	HMGN3 antisense RNA 1 [Source:HGNC Symbol;Acc:HGNC:48984]	551.6185	-0.2901972	0.08760072	0.000352424	0.002796266	655	714	737	659	472	522	458	492	592.5084	552.2126	698.4527	661.9466	470.8664	534.8776	479.8216	527.6284	Down Regulated
ENSG00000118418	ENSG00000118418.14	HMGN3	79201245	79234689	-1	mRNA	high mobility group nucleosomal binding domain 3 [Source:HGNC Symbol;Acc:HGNC:12312]	1636.091	-0.3958959	0.09984713	1.713747e-05	0.000233465	1895	2453	1773	1618	1110	1234	1346	1279	1714.204	1897.167	1680.267	1625.235	1107.334	1264.442	1410.131	1371.619	Down Regulated
ENSG00000261366	ENSG00000261366.1	MANEA-DT	95575183	95577450	-1	lncRNA	MANEA divergent transcript [Source:HGNC Symbol;Acc:HGNC:43732]	185.8911	-0.4620165	0.1271717	3.72e-05	0.000446442	251	253	269	184	139	163	159	122	227.0528	195.672	254.9305	184.8227	138.6662	167.0212	166.5756	130.8347	Down Regulated
ENSG00000172469	ENSG00000172469.16	MANEA	95577485	95609470	1	mRNA	mannosidase endo-alpha [Source:HGNC Symbol;Acc:HGNC:21072]	1159.682	-0.3434775	0.11191	0.0006078071	0.004280783	1228	1489	1114	872	768	742	837	763	1110.84	1151.603	1055.734	875.899	766.1554	760.3049	876.8792	818.2529	Down Regulated
ENSG00000260000	ENSG00000260000.2		100881450	100882993	1	lncRNA	novel transcript, antisense to ASCC3	52.85314	-0.4070736	0.2016921	0.007563583	0.03178802	71	73	59	36	37	40	36	31	64.2261	56.45871	55.91412	36.16097	36.91113	40.98679	37.71523	33.24488	Down Regulated
ENSG00000112249	ENSG00000112249.14	ASCC3	100508194	100881372	-1	mRNA	activating signal cointegrator 1 complex subunit 3 [Source:HGNC Symbol;Acc:HGNC:18697]	4564.975	-0.172007	0.07326214	0.01277684	0.04790019	4057	4785	4442	3950	3181	3334	3495	3185	3669.934	3700.752	4209.67	3967.662	3173.36	3416.249	3661.521	3415.643	Down Regulated
ENSG00000203808	ENSG00000203808.11	BVES-AS1	105136308	105199559	1	lncRNA	BVES antisense RNA 1 [Source:HGNC Symbol;Acc:HGNC:21223]	43.34611	-1.014928	0.2318059	7.97e-07	1.84e-05	135	139	44	76	45	32	42	38	122.1201	107.5036	41.69867	76.33982	44.89192	32.78943	44.00111	40.75178	Down Regulated
ENSG00000132429	ENSG00000132429.10	POPDC3	105157900	105180014	-1	mRNA	popeye domain containing 3 [Source:HGNC Symbol;Acc:HGNC:17649]	204.341	-1.046396	0.159706	3.981176e-12	4.301364e-10	348	396	145	297	136	119	109	117	314.7984	306.2692	137.4161	298.328	135.6734	121.9357	114.1933	125.4726	Down Regulated
ENSG00000203808	ENSG00000203808.11	BVES-AS1	105136308	105199559	1	lncRNA	BVES antisense RNA 1 [Source:HGNC Symbol;Acc:HGNC:21223]	43.34611	-1.014928	0.2318059	7.97e-07	1.84e-05	135	139	44	76	45	32	42	38	122.1201	107.5036	41.69867	76.33982	44.89192	32.78943	44.00111	40.75178	Down Regulated
ENSG00000112276	ENSG00000112276.14	BVES	105096822	105137157	-1	mRNA	blood vessel epicardial substance [Source:HGNC Symbol;Acc:HGNC:1152]	1053.709	-0.8781967	0.1201858	2.206215e-14	3.344226e-12	2824	3073	1163	1636	975	957	1035	990	2554.571	2376.68	1102.172	1643.315	972.6583	980.6089	1084.313	1061.691	Down Regulated
ENSG00000269919	ENSG00000269919.1		106100140	106100593	1	lncRNA	novel transcript, sense intronic to PRDM1	36.19382	1.39983	0.2808746	3.6e-08	1.42e-06	14	36	30	27	64	46	76	76	12.6643	27.84265	28.43091	27.12073	63.84629	47.13481	79.62105	81.50357	Up Regulated
ENSG00000057663	ENSG00000057663.16	ATG5	106045423	106325791	-1	mRNA	autophagy related 5 [Source:HGNC Symbol;Acc:HGNC:589]	1565.033	-0.3103202	0.06930708	2.728083e-06	5.083746e-05	1519	1846	1468	1354	1005	1090	1112	1074	1374.077	1427.709	1391.219	1360.054	1002.586	1116.89	1164.982	1151.774	Down Regulated
ENSG00000269919	ENSG00000269919.1		106100140	106100593	1	lncRNA	novel transcript, sense intronic to PRDM1	36.19382	1.39983	0.2808746	3.6e-08	1.42e-06	14	36	30	27	64	46	76	76	12.6643	27.84265	28.43091	27.12073	63.84629	47.13481	79.62105	81.50357	Up Regulated
ENSG00000057657	ENSG00000057657.17	PRDM1	105993463	106109939	1	mRNA	PR/SET domain 1 [Source:HGNC Symbol;Acc:HGNC:9346]	1950.466	1.1466	0.1618779	9.378199e-14	1.304726e-11	2115	2084	1856	861	3208	3041	3510	3748	1913.214	1611.78	1758.926	864.8498	3200.295	3116.021	3677.235	4019.413	Up Regulated
ENSG00000234206	ENSG00000234206.5		107509803	107511721	-1	lncRNA	novel transcript	38.27547	-1.388024	0.2211777	2.34e-11	2.15e-09	113	109	50	73	32	32	22	23	102.219	84.30136	47.38485	73.32641	31.92314	32.78943	23.0482	24.66555	Down Regulated
ENSG00000112320	ENSG00000112320.12	SOBP	107490106	107661306	1	mRNA	sine oculis binding protein homolog [Source:HGNC Symbol;Acc:HGNC:29256]	350.4087	-1.033231	0.1451797	7.7745e-14	1.089073e-11	852	864	291	598	261	290	248	268	770.7132	668.2236	275.7798	600.6738	260.3731	297.1542	259.8161	287.4073	Down Regulated
ENSG00000227502	ENSG00000227502.2	MROCKI	113868013	113873390	-1	lncRNA	MARCKS cis regulating lncRNA promoter of cytokines and inflammation [Source:HGNC Symbol;Acc:HGNC:50323]	1323.762	0.8642254	0.2322513	1.39e-05	0.000196524	963	1204	1143	629	1445	1626	1766	1777	871.123	931.182	1083.218	631.8125	1441.529	1666.113	1850.142	1905.682	Up Regulated
ENSG00000277443	ENSG00000277443.3	MARCKS	113857345	113863475	1	mRNA	myristoylated alanine rich protein kinase C substrate [Source:HGNC Symbol;Acc:HGNC:6759]	4928.985	0.5130441	0.2143512	0.001998313	0.01109312	2895	3893	3349	1435	3472	3750	4172	3888	2618.797	3010.873	3173.837	1441.416	3463.661	3842.511	4370.776	4169.551	Up Regulated
ENSG00000236703	ENSG00000236703.1	MYB-AS1	135195083	135195995	-1	lncRNA	MYB antisense RNA 1 [Source:HGNC Symbol;Acc:HGNC:37457]	20.41085	-0.8572471	0.2621238	7.29e-05	0.000775401	67	142	64	59	43	38	27	35	60.60773	109.8238	60.65261	59.26381	42.89672	38.93745	28.28642	37.53454	Down Regulated
ENSG00000118513	ENSG00000118513.19	MYB	135181308	135219173	1	mRNA	MYB proto-oncogene, transcription factor [Source:HGNC Symbol;Acc:HGNC:7545]	1531.795	-0.6056204	0.1140182	1.301497e-08	5.954054e-07	4148	7433	3587	4705	2671	2663	2877	2726	3752.252	5748.734	3399.389	4726.038	2664.585	2728.695	3014.076	2923.404	Down Regulated
ENSG00000237596	ENSG00000237596.6		135991936	136225751	-1	lncRNA	novel transcript	91.80657	-0.5609175	0.1672395	9.42e-05	0.000957084	207	252	230	353	168	139	128	159	187.2507	194.8986	217.9703	354.5784	167.5965	142.4291	134.0986	170.514	Down Regulated
ENSG00000171408	ENSG00000171408.14	PDE7B	135851701	136195574	1	mRNA	phosphodiesterase 7B [Source:HGNC Symbol;Acc:HGNC:8792]	318.089	-0.3390879	0.1400048	0.004108571	0.01974292	396	738	342	800	374	361	393	377	358.2188	570.7744	324.1124	803.577	373.1017	369.9058	411.7246	404.3006	Down Regulated
ENSG00000237499	ENSG00000237499.6	WAKMAR2	137823673	137868233	-1	lncRNA	wound and keratinocyte migration associated lncRNA 2 [Source:HGNC Symbol;Acc:HGNC:53754]	347.4621	3.22109	0.2057428	1.28e-56	4.35e-53	95	69	47	104	671	599	722	640	85.93633	53.36508	44.54176	104.465	669.3884	613.7772	756.4	686.3458	Up Regulated
ENSG00000118503	ENSG00000118503.15	TNFAIP3	137867214	137883314	1	mRNA	TNF alpha induced protein 3 [Source:HGNC Symbol;Acc:HGNC:11896]	6604.385	3.601393	0.341139	2.299395e-27	1.253522e-24	874	781	639	904	7493	8023	10333	9678	790.6143	604.0309	605.5784	908.0421	7475.003	8220.925	10825.32	10378.84	Up Regulated
ENSG00000227627	ENSG00000227627.2		152983331	152991322	1	lncRNA	novel transcript	32.71825	-0.4237072	0.1804119	0.00334837	0.01672291	83	107	62	59	58	42	45	43	75.08122	82.75455	58.75721	59.26381	57.8607	43.03613	47.14404	46.11386	Down Regulated
ENSG00000112031	ENSG00000112031.16	MTRF1L	152987362	153002709	-1	mRNA	mitochondrial translation release factor 1 like [Source:HGNC Symbol;Acc:HGNC:21051]	311.2379	-0.2315277	0.1034542	0.01130504	0.04358524	501	487	483	362	288	328	365	342	453.2011	376.6492	457.7376	363.6186	287.3083	336.0917	382.3906	366.7661	Down Regulated
ENSG00000227627	ENSG00000227627.2		152983331	152991322	1	lncRNA	novel transcript	32.71825	-0.4237072	0.1804119	0.00334837	0.01672291	83	107	62	59	58	42	45	43	75.08122	82.75455	58.75721	59.26381	57.8607	43.03613	47.14404	46.11386	Down Regulated
ENSG00000112029	ENSG00000112029.10	FBXO5	152970519	152983579	-1	mRNA	F-box protein 5 [Source:HGNC Symbol;Acc:HGNC:13584]	774.5974	-0.3909922	0.1523345	0.002131544	0.01166063	1478	1805	1199	772	794	855	834	782	1336.988	1396	1136.289	775.4518	792.093	876.0926	873.7362	838.6288	Down Regulated
ENSG00000271913	ENSG00000271913.6	TAGAP-AS1	158988178	159088114	1	lncRNA	TAGAP antisense RNA 1 [Source:HGNC Symbol;Acc:HGNC:55239]	220.7396	-0.2646786	0.116459	0.009254105	0.03728811	305	371	376	397	255	242	259	270	275.9009	286.934	356.3341	398.7751	254.3875	247.9701	271.3402	289.5522	Down Regulated
ENSG00000130363	ENSG00000130363.11	RSPH3	158972871	159000202	-1	mRNA	radial spoke head 3 [Source:HGNC Symbol;Acc:HGNC:21054]	1316.553	-0.1428913	0.05936122	0.01234803	0.04667161	1306	1337	1290	1270	1072	1012	1049	964	1181.398	1034.045	1222.529	1275.679	1069.425	1036.966	1098.98	1033.808	Down Regulated
ENSG00000268257	ENSG00000268257.2	AIRN	160003291	160007664	-1	lncRNA	antisense of IGF2R non-protein coding RNA [Source:HGNC Symbol;Acc:HGNC:34515]	147.8228	0.613866	0.1206988	4.35e-08	1.65e-06	171	150	189	153	257	210	213	231	154.6854	116.011	179.1147	153.6841	256.3827	215.1806	223.1485	247.728	Up Regulated
ENSG00000197081	ENSG00000197081.13	IGF2R	159969082	160113507	1	mRNA	insulin like growth factor 2 receptor [Source:HGNC Symbol;Acc:HGNC:5467]	17278.97	0.2703328	0.08050488	0.0003379407	0.002706724	16938	21923	16741	16031	20102	17973	17069	20755	15322	16955.4	15865.4	16102.68	20053.72	18416.39	17882.26	22257.98	Up Regulated
ENSG00000279355	ENSG00000279355.1	AGPAT4-IT1	161160105	161161982	-1	lncRNA	novel transcript	329.8548	0.456822	0.1232793	3.74e-05	0.000448023	237	166	242	151	295	252	228	213	214.3885	128.3856	229.3427	151.6752	294.2915	258.2168	238.8631	228.4245	Up Regulated
ENSG00000026652	ENSG00000026652.14	AGPAT4	161129967	161274061	-1	mRNA	1-acylglycerol-3-phosphate O-acyltransferase 4 [Source:HGNC Symbol;Acc:HGNC:20885]	2162.039	0.3651585	0.07715341	6.157388e-07	1.471398e-05	1663	1330	1792	1235	1885	1786	1604	1624	1504.338	1028.631	1698.273	1240.522	1880.473	1830.06	1680.423	1741.603	Up Regulated
ENSG00000232082	ENSG00000232082.1	RPS6KA2-IT1	166460663	166465383	-1	lncRNA	RPS6KA2 intronic transcript 1 [Source:HGNC Symbol;Acc:HGNC:41378]	68.37993	0.8324388	0.2003508	2.46e-06	4.65e-05	38	42	62	51	86	65	73	94	34.37453	32.48309	58.75721	51.22804	85.79345	66.60353	76.47811	100.807	Up Regulated
ENSG00000071242	ENSG00000071242.12	RPS6KA2	166409364	166906451	-1	mRNA	ribosomal protein S6 kinase A2 [Source:HGNC Symbol;Acc:HGNC:10431]	3929.101	0.5859858	0.1269435	4.870544e-07	1.222874e-05	1875	2234	2430	1463	2896	2663	2466	2718	1696.112	1727.791	2302.904	1469.542	2889.044	2728.695	2583.493	2914.825	Up Regulated
ENSG00000249852	ENSG00000249852.1		227554	229557	-1	lncRNA	TEC	117.5219	0.4918374	0.2320527	0.004100671	0.01970961	111	155	131	78	181	128	130	193	100.4098	119.8781	124.1483	78.34876	180.5653	131.1577	136.1939	206.9762	Up Regulated
ENSG00000177706	ENSG00000177706.9	FAM20C	192571	260772	1	mRNA	FAM20C golgi associated secretory pathway kinase [Source:HGNC Symbol;Acc:HGNC:22140]	4173.229	0.4657082	0.2048476	0.003209914	0.01614255	3398	3139	3284	1850	4134	3654	3548	3771	3073.807	2427.725	3112.237	1858.272	4124.071	3744.143	3717.046	4044.078	Up Regulated
ENSG00000232821	ENSG00000232821.1		19112474	19114271	1	lncRNA	novel transcript	94.43158	0.9128094	0.2167572	1.77e-06	3.56e-05	49	76	62	68	99	109	128	107	44.32506	58.77893	58.75721	68.30405	98.76222	111.689	134.0986	114.7484	Up Regulated
ENSG00000122691	ENSG00000122691.13	TWIST1	19020991	19117636	-1	mRNA	twist family bHLH transcription factor 1 [Source:HGNC Symbol;Acc:HGNC:12428]	700.0746	0.4005948	0.195874	0.007239329	0.03072404	505	576	370	413	586	599	572	540	456.8194	445.4824	350.6479	414.8466	584.5926	613.7772	599.2532	579.1043	Up Regulated
ENSG00000253187	ENSG00000253187.2	HOXA10-AS	27168619	27171915	1	lncRNA	HOXA10 antisense RNA [Source:HGNC Symbol;Acc:HGNC:40281]	42.63761	-0.6342616	0.1970532	0.0001303	0.001237328	71	81	70	56	31	34	45	36	64.2261	62.64597	66.33879	56.25039	30.92554	34.83877	47.14404	38.60695	Down Regulated
ENSG00000253293	ENSG00000253293.5	HOXA10	27170605	27180261	-1	mRNA	homeobox A10 [Source:HGNC Symbol;Acc:HGNC:5100]	314.3127	-0.3664918	0.1025947	9.557603e-05	0.0009672846	560	653	331	341	317	308	331	272	506.5721	505.0348	313.6877	342.5247	316.2386	315.5983	346.7706	291.697	Down Regulated
ENSG00000253187	ENSG00000253187.2	HOXA10-AS	27168619	27171915	1	lncRNA	HOXA10 antisense RNA [Source:HGNC Symbol;Acc:HGNC:40281]	42.63761	-0.6342616	0.1970532	0.0001303	0.001237328	71	81	70	56	31	34	45	36	64.2261	62.64597	66.33879	56.25039	30.92554	34.83877	47.14404	38.60695	Down Regulated
ENSG00000078399	ENSG00000078399.18	HOXA9	27162438	27175180	-1	mRNA	homeobox A9 [Source:HGNC Symbol;Acc:HGNC:5109]	552.0143	-0.2072202	0.09124209	0.01307889	0.04876256	527	848	526	439	436	428	409	437	476.7205	655.8491	498.4886	440.9629	434.9528	438.5586	428.487	468.6455	Down Regulated
ENSG00000273014	ENSG00000273014.1		32758882	32759353	1	lncRNA	novel transcript	42.16393	-0.4091612	0.1980697	0.005846377	0.02598504	106	113	56	73	49	53	48	58	95.88685	87.39499	53.07103	73.32641	48.88231	54.3075	50.28698	62.20009	Down Regulated
ENSG00000229358	ENSG00000229358.3	DPY19L1P1	32580949	32761787	-1	mRNA	DPY19L1 pseudogene 1 [Source:HGNC Symbol;Acc:HGNC:22395]	167.5982	-0.338689	0.1052574	0.0003659993	0.002881465	286	337	267	299	177	199	199	223	258.7136	260.6382	253.0351	300.3369	176.5749	203.9093	208.4814	239.1486	Down Regulated
ENSG00000224101	ENSG00000224101.1	ELMO1-AS1	36997796	37013630	1	lncRNA	ELMO1 antisense RNA 1 [Source:HGNC Symbol;Acc:HGNC:40765]	22.54202	0.5826669	0.2472513	0.001915565	0.01070398	34	40	53	36	59	51	64	60	30.75616	30.93628	50.22794	36.16097	58.85829	52.25816	67.0493	64.34492	Up Regulated
ENSG00000155849	ENSG00000155849.15	ELMO1	36852906	37449223	-1	mRNA	engulfment and cell motility 1 [Source:HGNC Symbol;Acc:HGNC:16286]	1161.736	0.4890627	0.09041883	1.098612e-08	5.15358e-07	1644	1856	2181	1304	2214	2067	2205	2190	1487.151	1435.443	2066.927	1309.831	2208.682	2117.992	2310.058	2348.59	Up Regulated
ENSG00000224116	ENSG00000224116.6	INHBA-AS1	41693884	41779388	1	lncRNA	INHBA antisense RNA 1 [Source:HGNC Symbol;Acc:HGNC:40303]	43.74823	-1.817489	0.4093763	4.05e-07	1.04e-05	129	103	38	299	58	28	27	18	116.6925	79.66092	36.01249	300.3369	57.8607	28.69075	28.28642	19.30348	Down Regulated
ENSG00000122641	ENSG00000122641.11	INHBA	41667168	41705834	-1	mRNA	inhibin subunit beta A [Source:HGNC Symbol;Acc:HGNC:6066]	62.097	-2.290424	0.646155	1.421767e-05	0.0002001056	88	53	37	420	32	26	17	17	79.60418	40.99057	35.06479	421.8779	31.92314	26.64141	17.80997	18.23106	Down Regulated
ENSG00000272219	ENSG00000272219.1		101960116	101961894	1	lncRNA	novel transcript, sense intronic to CUX1	37.80965	0.4714205	0.2832525	0.01044103	0.04094173	38	70	61	38	76	48	53	106	34.37453	54.13849	57.80952	38.16991	75.81746	49.18415	55.5252	113.676	Up Regulated
ENSG00000257923	ENSG00000257923.11	CUX1	101815904	102283958	1	mRNA	cut like homeobox 1 [Source:HGNC Symbol;Acc:HGNC:2557]	2625.743	0.2379289	0.07191386	0.0004787228	0.003548838	3546	3796	3083	2759	3748	3202	3071	3620	3207.687	2935.853	2921.75	2771.336	3738.998	3280.992	3217.319	3882.144	Up Regulated
ENSG00000224897	ENSG00000224897.7	POT1-AS1	124929873	125482966	1	lncRNA	POT1 antisense RNA 1 [Source:HGNC Symbol;Acc:HGNC:49459]	65.44174	-0.471154	0.2610154	0.008594503	0.03525274	37	34	30	35	27	13	23	13	33.46994	26.29584	28.43091	35.1565	26.93515	13.32071	24.09584	13.9414	Down Regulated
ENSG00000128513	ENSG00000128513.15	POT1	124822386	124929983	-1	mRNA	protection of telomeres 1 [Source:HGNC Symbol;Acc:HGNC:17284]	737.4444	-0.2549398	0.08169396	0.0008296921	0.005464561	737	927	720	672	557	584	565	485	666.685	716.9483	682.3418	675.0047	555.6622	598.4071	591.9196	520.1215	Down Regulated
ENSG00000240449	ENSG00000240449.1	REPIN1-AS1	150363777	150372590	-1	lncRNA	REPIN1 antisense RNA 1 [Source:HGNC Symbol;Acc:HGNC:41201]	56.9331	0.602849	0.2795557	0.00260398	0.01368487	35	33	40	31	41	50	50	66	31.66075	25.52243	37.90788	31.13861	40.90153	51.23349	52.38227	70.77942	Up Regulated
ENSG00000214022	ENSG00000214022.11	REPIN1	150368189	150374044	1	mRNA	replication initiator 1 [Source:HGNC Symbol;Acc:HGNC:17922]	2152.246	0.9318878	0.1782622	1.250505e-08	5.759695e-07	1736	1929	1714	1091	2823	2870	2839	2571	1570.373	1491.902	1624.353	1095.878	2816.22	2940.802	2974.265	2757.18	Up Regulated
ENSG00000222012	ENSG00000222012.1		157614023	157618765	1	lncRNA	novel transcript, antisense to PTPRN2	25.25087	-0.9590589	0.2436833	5.71e-06	9.34e-05	60	106	40	68	38	23	27	25	54.27558	81.98114	37.90788	68.30405	37.90873	23.5674	28.28642	26.81038	Down Regulated
ENSG00000155093	ENSG00000155093.19	PTPRN2	157539056	158587823	-1	mRNA	protein tyrosine phosphatase receptor type N2 [Source:HGNC Symbol;Acc:HGNC:9677]	514.2562	-0.4233614	0.1093211	2.230679e-05	0.0002913798	727	836	510	571	482	412	395	376	657.6391	646.5682	483.3255	573.5531	480.8423	422.1639	413.8199	403.2282	Down Regulated
ENSG00000272240	ENSG00000272240.1		234347	234887	-1	lncRNA	novel transcript, antisense to ZNF596	33.2698	-0.5622471	0.2575898	0.002963828	0.01516405	38	50	27	24	17	19	12	25	34.37453	38.67035	25.58782	24.10731	16.95917	19.46872	12.57174	26.81038	Down Regulated
ENSG00000172748	ENSG00000172748.14	ZNF596	232137	264703	1	mRNA	zinc finger protein 596 [Source:HGNC Symbol;Acc:HGNC:27268]	262.8093	-0.5085451	0.1187684	2.86245e-06	5.274824e-05	259	296	192	134	128	151	116	124	234.2896	228.9285	181.9578	134.5992	127.6926	154.7251	121.5269	132.9795	Down Regulated
ENSG00000273402	ENSG00000273402.1		237045	237669	1	lncRNA	novel transcript, antisense to ZNF596	17.2618	-1.588626	0.4247239	1.36e-05	0.000193328	13	30	18	15	4	4	10	1	11.75971	23.20221	17.05855	15.06707	3.990393	4.098679	10.47645	1.072415	Down Regulated
ENSG00000172748	ENSG00000172748.14	ZNF596	232137	264703	1	mRNA	zinc finger protein 596 [Source:HGNC Symbol;Acc:HGNC:27268]	262.8093	-0.5085451	0.1187684	2.86245e-06	5.274824e-05	259	296	192	134	128	151	116	124	234.2896	228.9285	181.9578	134.5992	127.6926	154.7251	121.5269	132.9795	Down Regulated
ENSG00000253535	ENSG00000253535.5	ADAM7-AS1	24295814	24912073	-1	lncRNA	ADAM7, ADAMDEC1 and ADAM28 antisense RNA 1 [Source:HGNC Symbol;Acc:HGNC:56152]	205.8725	2.453994	0.3520526	1.7e-13	2.25e-11	7	16	21	13	57	84	73	77	6.332151	12.37451	19.90164	13.05813	56.8631	86.07226	76.47811	82.57599	Up Regulated
ENSG00000134028	ENSG00000134028.14	ADAMDEC1	24384285	24406013	1	mRNA	ADAM like decysin 1 [Source:HGNC Symbol;Acc:HGNC:16299]	5951.349	0.3430185	0.1716032	0.01088889	0.0422574	367	692	610	226	474	560	588	559	331.9856	535.1976	578.0952	227.0105	472.8616	573.815	616.0155	599.4802	Up Regulated
ENSG00000253535	ENSG00000253535.5	ADAM7-AS1	24295814	24912073	-1	lncRNA	ADAM7, ADAMDEC1 and ADAM28 antisense RNA 1 [Source:HGNC Symbol;Acc:HGNC:56152]	205.8725	2.453994	0.3520526	1.7e-13	2.25e-11	7	16	21	13	57	84	73	77	6.332151	12.37451	19.90164	13.05813	56.8631	86.07226	76.47811	82.57599	Up Regulated
ENSG00000042980	ENSG00000042980.12	ADAM28	24294069	24359014	1	mRNA	ADAM metallopeptidase domain 28 [Source:HGNC Symbol;Acc:HGNC:206]	2409.612	0.5043909	0.1268235	1.067946e-05	0.0001571892	676	1093	1163	582	1050	1122	1123	1144	611.5048	845.3338	1102.172	584.6023	1047.478	1149.679	1176.506	1226.843	Up Regulated
ENSG00000269924	ENSG00000269924.1		47527397	47528148	1	lncRNA	novel transcript, sense intronic to KIAA0146	83.04014	0.4173073	0.1947196	0.005356736	0.02425457	82	105	147	165	157	148	139	191	74.17662	81.20773	139.3115	165.7378	156.6229	151.6511	145.6227	204.8313	Up Regulated
ENSG00000164808	ENSG00000164808.16	SPIDR	47260878	47736306	1	mRNA	scaffold protein involved in DNA repair [Source:HGNC Symbol;Acc:HGNC:28971]	2461.932	0.2205556	0.06201421	0.00021052	0.001839967	2058	2702	2813	2668	2678	2594	2624	2644	1861.652	2089.746	2665.872	2679.929	2671.568	2657.993	2749.021	2835.466	Up Regulated
ENSG00000254006	ENSG00000254006.5		64801236	64817573	-1	lncRNA	novel transcript	94.51385	-0.8341137	0.2350528	2.7e-05	0.000341981	193	251	115	223	75	83	110	85	174.5864	194.1252	108.9852	223.9971	74.81987	85.04759	115.241	91.15531	Down Regulated
ENSG00000172817	ENSG00000172817.4	CYP7B1	64587763	64798737	-1	mRNA	cytochrome P450 family 7 subfamily B member 1 [Source:HGNC Symbol;Acc:HGNC:2652]	1400.173	-0.3896168	0.1494595	0.00193032	0.01077457	1178	1037	793	766	614	598	625	552	1065.611	802.023	751.5237	769.425	612.5253	612.7525	654.7784	591.9733	Down Regulated
ENSG00000251136	ENSG00000251136.8	RIPK2-DT	89545424	89757812	-1	lncRNA	RIPK2 divergent transcript [Source:HGNC Symbol;Acc:HGNC:55545]	687.2952	0.5600083	0.1409724	9.11e-06	0.000137535	648	620	698	835	896	867	981	1031	586.1762	479.5123	661.4925	838.7335	893.848	888.3887	1027.74	1105.66	Up Regulated
ENSG00000104312	ENSG00000104312.8	RIPK2	89757806	89791064	1	mRNA	receptor interacting serine/threonine kinase 2 [Source:HGNC Symbol;Acc:HGNC:10020]	816.9748	0.9394269	0.1944911	9.561089e-08	3.168105e-06	344	481	418	442	775	644	760	777	311.18	372.0088	396.1373	443.9763	773.1386	659.8873	796.2105	833.2668	Up Regulated
ENSG00000253385	ENSG00000253385.1		102854455	102856075	1	lncRNA	novel transcript	88.26396	1.192967	0.1829158	4.3e-12	4.62e-10	77	97	105	103	159	168	209	253	69.65366	75.02048	99.50818	103.4605	158.6181	172.1445	218.9579	271.3211	Up Regulated
ENSG00000155096	ENSG00000155096.14	AZIN1	102826111	102893864	-1	mRNA	antizyme inhibitor 1 [Source:HGNC Symbol;Acc:HGNC:16432]	7076.695	-0.2097709	0.07255079	0.002210252	0.01200712	6634	8394	6068	7302	5107	5117	5759	5147	6001.07	6491.978	5750.625	7334.649	5094.734	5243.235	6033.39	5519.722	Down Regulated
ENSG00000253320	ENSG00000253320.6	MAILR	102864271	103002424	1	lncRNA	macrophage interferon regulatory lncRNA [Source:HGNC Symbol;Acc:HGNC:51558]	703.197	2.739664	0.2797057	6.08e-24	2.24e-21	191	184	146	165	858	889	1138	1248	172.7773	142.3069	138.3638	165.7378	855.9393	910.9314	1192.22	1338.374	Up Regulated
ENSG00000155096	ENSG00000155096.14	AZIN1	102826111	102893864	-1	mRNA	antizyme inhibitor 1 [Source:HGNC Symbol;Acc:HGNC:16432]	7076.695	-0.2097709	0.07255079	0.002210252	0.01200712	6634	8394	6068	7302	5107	5117	5759	5147	6001.07	6491.978	5750.625	7334.649	5094.734	5243.235	6033.39	5519.722	Down Regulated
ENSG00000245149	ENSG00000245149.3	RNF139-DT	124462485	124474582	-1	lncRNA	RNF139 divergent transcript [Source:HGNC Symbol;Acc:HGNC:48940]	250.8719	-0.4382085	0.1296151	9.08e-05	0.000927577	316	244	325	392	220	220	185	177	285.8514	188.7113	308.0015	393.7528	219.4716	225.4273	193.8144	189.8175	Down Regulated
ENSG00000183665	ENSG00000183665.5	TRMT12	124450820	124462150	1	mRNA	tRNA methyltransferase 12 homolog [Source:HGNC Symbol;Acc:HGNC:26091]	536.114	-0.2664766	0.0832453	0.00059161	0.00419434	475	478	436	465	344	374	277	332	429.6817	369.6885	413.1959	467.0792	343.1738	383.2265	290.1978	356.0419	Down Regulated
ENSG00000281769	ENSG00000281769.1	LINC01230	1045625	1048641	1	lncRNA	long intergenic non-protein coding RNA 1230 [Source:HGNC Symbol;Acc:HGNC:49686]	50.31378	-0.934041	0.3403292	0.000329097	0.002649476	49	48	21	145	28	36	17	28	44.32506	37.12353	19.90164	145.6483	27.93275	36.88811	17.80997	30.02763	Down Regulated
ENSG00000173253	ENSG00000173253.15	DMRT2	1049858	1057552	1	mRNA	doublesex and mab-3 related transcription factor 2 [Source:HGNC Symbol;Acc:HGNC:2935]	295.4183	-0.8597394	0.2620983	6.777843e-05	0.0007326852	141	137	94	289	88	68	83	60	127.5476	105.9568	89.08352	290.2922	87.78864	69.67754	86.95457	64.34492	Down Regulated
ENSG00000236404	ENSG00000236404.9	VLDLR-AS1	2421597	2622457	-1	lncRNA	VLDLR antisense RNA 1 [Source:HGNC Symbol;Acc:HGNC:49621]	106.1564	-0.8872553	0.17781	4.53e-08	1.71e-06	254	287	119	216	99	98	92	103	229.7666	221.9678	112.7759	216.9658	98.76222	100.4176	96.38337	110.4588	Down Regulated
ENSG00000147852	ENSG00000147852.16	VLDLR	2621182	2660056	1	mRNA	very low density lipoprotein receptor [Source:HGNC Symbol;Acc:HGNC:12698]	1357.615	-0.7675006	0.123512	4.672471e-11	4.108538e-09	3632	4928	1838	2596	1571	1586	1637	1557	3285.482	3811.35	1741.867	2607.608	1567.227	1625.126	1714.995	1669.751	Down Regulated
ENSG00000260912	ENSG00000260912.1		19453209	19455173	1	lncRNA	novel transcript, overlapping ACER2	76.73796	-0.7537753	0.1959629	8.1e-06	0.000124998	111	110	67	83	33	53	45	48	100.4098	85.07477	63.4957	83.37112	32.92074	54.3075	47.14404	51.47594	Down Regulated
ENSG00000177076	ENSG00000177076.6	ACER2	19409009	19452505	1	mRNA	alkaline ceramidase 2 [Source:HGNC Symbol;Acc:HGNC:23675]	107.1292	-0.5658957	0.1623987	6.043963e-05	0.0006628779	140	144	99	126	88	67	63	68	126.643	111.3706	93.822	126.5634	87.78864	68.65287	66.00166	72.92425	Down Regulated
ENSG00000281491	ENSG00000281491.1	DNAJB5-DT	34985410	34989379	-1	lncRNA	DNAJB5 divergent transcript [Source:HGNC Symbol;Acc:HGNC:49846]	25.06582	1.898005	0.3186332	1.88e-10	1.44e-08	9	6	9	12	43	30	26	27	8.141337	4.640442	8.529273	12.05366	42.89672	30.74009	27.23878	28.95522	Up Regulated
ENSG00000137094	ENSG00000137094.14	DNAJB5	34989641	34998900	1	mRNA	DnaJ heat shock protein family (Hsp40) member B5 [Source:HGNC Symbol;Acc:HGNC:14887]	830.3976	0.7148821	0.1652087	1.376165e-06	2.887671e-05	397	359	532	521	723	742	602	682	359.1234	277.6531	504.1748	523.3296	721.2635	760.3049	630.6825	731.3873	Up Regulated
ENSG00000203321	ENSG00000203321.2	CARNMT1-AS1	74952968	74996293	1	lncRNA	CARNMT1 antisense RNA 1 [Source:HGNC Symbol;Acc:HGNC:51188]	18.94104	-0.4532859	0.2692627	0.01131574	0.04360563	40	34	38	34	27	14	21	20	36.18372	26.29584	36.01249	34.15202	26.93515	14.34538	22.00055	21.44831	Down Regulated
ENSG00000156017	ENSG00000156017.13	CARNMT1	74980790	75028423	-1	mRNA	carnosine N-methyltransferase 1 [Source:HGNC Symbol;Acc:HGNC:23435]	713.0567	-0.2929417	0.08947356	0.0003982195	0.00307319	549	694	558	647	414	426	433	439	496.6215	536.7444	528.8149	649.8929	413.0057	436.5093	453.6304	470.7904	Down Regulated
ENSG00000203321	ENSG00000203321.2	CARNMT1-AS1	74952968	74996293	1	lncRNA	CARNMT1 antisense RNA 1 [Source:HGNC Symbol;Acc:HGNC:51188]	18.94104	-0.4532859	0.2692627	0.01131574	0.04360563	40	34	38	34	27	14	21	20	36.18372	26.29584	36.01249	34.15202	26.93515	14.34538	22.00055	21.44831	Down Regulated
ENSG00000135045	ENSG00000135045.7	C9orf40	74946583	74952912	-1	mRNA	chromosome 9 open reading frame 40 [Source:HGNC Symbol;Acc:HGNC:23433]	210.1743	-0.6027595	0.1401279	1.998083e-06	3.936475e-05	417	596	252	279	195	208	219	215	377.2153	460.9506	238.8196	280.2475	194.5317	213.1313	229.4343	230.5693	Down Regulated
ENSG00000273066	ENSG00000273066.5		136799223	136810042	1	lncRNA	novel transcript	36.38005	-0.4467392	0.2195194	0.005390926	0.02437678	46	57	49	74	32	26	36	38	41.61128	44.0842	46.43715	74.33088	31.92314	26.64141	37.71523	40.75178	Down Regulated
ENSG00000213212	ENSG00000213212.3	NCLP1	136812788	136815536	-1	mRNA	nucleolin pseudogene 1 [Source:HGNC Symbol;Acc:HGNC:35472]	69.40754	-0.6276433	0.1689474	2.151646e-05	0.0002836096	77	130	113	141	58	76	56	59	69.65366	100.5429	107.0898	141.6305	57.8607	77.8749	58.66814	63.27251	Down Regulated
ENSG00000270069	ENSG00000270069.1	MIR222HG	45745210	45770274	-1	lncRNA	miR222/221 cluster host gene [Source:HGNC Symbol;Acc:HGNC:49555]	1547.158	1.004795	0.115123	1.89e-19	5.12e-17	943	1020	1193	1218	1881	1942	2030	2007	853.0312	788.8751	1130.602	1223.446	1876.482	1989.909	2126.72	2152.338	Up Regulated
ENSG00000207725	ENSG00000207725.3	MIR222	45747015	45747124	-1	mRNA	microRNA 222 [Source:HGNC Symbol;Acc:HGNC:31602]	23.6958	0.5711165	0.2938365	0.004422756	0.02089186	14	16	23	36	25	42	32	34	12.6643	12.37451	21.79703	36.16097	24.93996	43.03613	33.52465	36.46212	Up Regulated
ENSG00000270069	ENSG00000270069.1	MIR222HG	45745210	45770274	-1	lncRNA	miR222/221 cluster host gene [Source:HGNC Symbol;Acc:HGNC:49555]	1547.158	1.004795	0.115123	1.89e-19	5.12e-17	943	1020	1193	1218	1881	1942	2030	2007	853.0312	788.8751	1130.602	1223.446	1876.482	1989.909	2126.72	2152.338	Up Regulated
ENSG00000207870	ENSG00000207870.1	MIR221	45746157	45746266	-1	mRNA	microRNA 221 [Source:HGNC Symbol;Acc:HGNC:31601]	42.10937	1.052569	0.221451	2.023522e-07	5.896954e-06	26	43	27	22	46	63	53	59	23.51942	33.2565	25.58782	22.09837	45.88952	64.55419	55.5252	63.27251	Up Regulated
ENSG00000274536	ENSG00000274536.6	MIR223HG	66015414	66020426	1	lncRNA	MIR223 host gene [Source:HGNC Symbol;Acc:HGNC:54520]	323.2512	-0.5013584	0.1649337	0.000328525	0.002646964	442	654	469	932	371	400	400	313	399.8301	505.8082	444.4699	936.1673	370.1089	409.8679	419.0581	335.666	Down Regulated
ENSG00000155659	ENSG00000155659.15	VSIG4	66021738	66040125	-1	mRNA	V-set and immunoglobulin domain containing 4 [Source:HGNC Symbol;Acc:HGNC:17032]	395.6895	-0.6998999	0.1640861	1.885358e-06	3.75445e-05	282	413	204	324	179	133	175	138	255.0952	319.4171	193.3302	325.4487	178.5701	136.2811	183.3379	147.9933	Down Regulated
ENSG00000232160	ENSG00000232160.6	RAP2C-AS1	132217053	132432862	1	lncRNA	RAP2C antisense RNA 1 [Source:HGNC Symbol;Acc:HGNC:40957]	93.72118	0.8768433	0.1480349	2.59e-10	1.92e-08	78	57	63	49	103	108	97	99	70.55825	44.0842	59.70491	49.21909	102.7526	110.6643	101.6216	106.1691	Up Regulated
ENSG00000123728	ENSG00000123728.10	RAP2C	132203024	132219480	-1	mRNA	RAP2C, member of RAS oncogene family [Source:HGNC Symbol;Acc:HGNC:21165]	1584.37	0.3606981	0.1774054	0.009196837	0.03710152	1155	1096	885	761	1019	1073	1239	1287	1044.805	847.654	838.7118	764.4027	1016.553	1099.471	1298.033	1380.199	Up Regulated
ENSG00000235703	ENSG00000235703.5	EOLA2-DT	149938613	150224580	1	lncRNA	EOLA2 divergent transcript [Source:HGNC Symbol;Acc:HGNC:48579]	122.5091	0.3010533	0.1386515	0.00955653	0.03818852	136	166	181	188	199	161	200	196	123.0246	128.3856	171.5332	188.8406	198.522	164.9718	209.5291	210.1934	Up Regulated
ENSG00000183171	ENSG00000183171.5		150114378	150116520	1	mRNA	nucleolar protein 11, pseudogene	321.1837	-0.2178761	0.0936485	0.01069472	0.04174312	206	312	239	260	200	208	179	160	186.3462	241.303	226.4996	261.1625	199.5196	213.1313	187.5285	171.5865	Down Regulated

## Sheet: dotA
ENSEMBL ID	ENSEMBL ID with Version	Gene name	Gene start(bp)	Gene end(bp)	Strand	Type	Description	baseMean	log2FoldChange	lfcSE	pvalue	padj	Raw Mock1	Raw Mock2	Raw Mock3	Raw Mock4	Raw ΔdotA_A	Raw ΔdotA_B	Raw ΔdotA_C	Raw ΔdotA_D	Norm Mock1	Norm Mock2	Norm Mock3	Norm Mock4	Norm ΔdotA_A	Norm ΔdotA_B	Norm ΔdotA_C	Norm ΔdotA_D	Up/Down Regulation
ENSG00000237301	ENSG00000237301.1		15586136	15603626	-1	lncRNA	novel transcript	13.98997	-0.6582908	0.3944625	0.004956944	0.02392715	35	19	18	14	6	17	11	5	19.30289	20.01105	18.49579	13.88352	5.278986	15.00741	13.17036	4.627571	Down Regulated
ENSG00000235084	ENSG00000235084.3	CHCHD2P6	15604597	15605043	1	mRNA	coiled-coil-helix-coiled-coil-helix domain containing 2 pseudogene 6 [Source:HGNC Symbol;Acc:HGNC:39590]	425.365	-0.6986662	0.2047638	4.70157e-05	0.0007555245	1158	549	558	556	485	513	327	88	638.65	578.2139	573.3694	551.3741	426.7181	452.8708	391.5189	81.44524	Down Regulated
ENSG00000242125	ENSG00000242125.3	SNHG3	28505980	28510892	1	lncRNA	small nucleolar RNA host gene 3 [Source:HGNC Symbol;Acc:HGNC:10118]	1011.242	-0.3093178	0.1263525	0.003606717	0.01901366	2207	702	788	753	830	790	600	638	1217.185	739.3555	809.7044	746.7351	730.2598	697.4033	718.3833	590.478	Down Regulated
ENSG00000180198	ENSG00000180198.16	RCC1	28505943	28539300	1	mRNA	regulator of chromosome condensation 1 [Source:HGNC Symbol;Acc:HGNC:1913]	942.3306	-0.3313159	0.1004093	0.0002347297	0.002502798	1835	1009	1060	974	1060	1021	762	494	1012.023	1062.692	1089.196	965.8964	932.6209	901.3276	912.3468	457.204	Down Regulated
ENSG00000260920	ENSG00000260920.2		40464319	40466767	1	lncRNA	novel transcript, sense overlapping with ZNF643	1154.625	0.4506819	0.1058194	3.04e-06	9.48e-05	1092	779	638	962	1062	1143	800	1433	602.2502	820.4528	655.5729	953.9962	934.3806	1009.028	957.8444	1326.262	Up Regulated
ENSG00000187801	ENSG00000187801.15	ZFP69B	40450102	40463718	1	mRNA	ZFP69 zinc finger protein B [Source:HGNC Symbol;Acc:HGNC:28053]	1552.76	0.4824815	0.1053158	6.250636e-07	2.802713e-05	1601	908	1002	1266	1509	1563	1255	1810	882.9694	956.3173	1029.599	1255.467	1327.665	1379.799	1502.618	1675.181	Up Regulated
ENSG00000279667	ENSG00000279667.1		40473055	40474059	1	lncRNA	TEC	169.1518	0.3928553	0.1719642	0.002845013	0.01588016	117	93	90	121	136	124	82	205	64.52681	97.9488	92.47893	119.9933	119.657	109.4658	98.17905	189.7304	Up Regulated
ENSG00000187815	ENSG00000187815.10	ZFP69	40477290	40496343	1	mRNA	ZFP69 zinc finger protein [Source:HGNC Symbol;Acc:HGNC:24708]	3391.202	0.2988853	0.06293997	6.373655e-07	2.845312e-05	5542	3344	3259	3989	4618	4527	3280	5646	3056.475	3521.944	3348.765	3955.812	4063.06	3996.386	3927.162	5225.453	Up Regulated
ENSG00000234694	ENSG00000234694.1	CDC20-DT	43354684	43358676	-1	lncRNA	CDC20 divergent transcript [Source:HGNC Symbol;Acc:HGNC:55681]	35.20516	-0.4182055	0.2292599	0.007992982	0.03375332	118	42	50	42	52	37	34	22	65.07832	44.23494	51.37718	41.65056	45.75121	32.66319	40.70839	20.36131	Down Regulated
ENSG00000066322	ENSG00000066322.15	ELOVL1	43363398	43368074	-1	mRNA	ELOVL fatty acid elongase 1 [Source:HGNC Symbol;Acc:HGNC:14418]	4640.306	-0.4282266	0.114602	2.95063e-05	0.000529727	10102	4822	4778	4387	4463	4724	3415	2366	5571.366	5078.593	4909.604	4350.5	3926.686	4170.295	4088.798	2189.766	Down Regulated
ENSG00000234694	ENSG00000234694.1	CDC20-DT	43354684	43358676	-1	lncRNA	CDC20 divergent transcript [Source:HGNC Symbol;Acc:HGNC:55681]	35.20516	-0.4182055	0.2292599	0.007992982	0.03375332	118	42	50	42	52	37	34	22	65.07832	44.23494	51.37718	41.65056	45.75121	32.66319	40.70839	20.36131	Down Regulated
ENSG00000117399	ENSG00000117399.14	CDC20	43358981	43363203	1	mRNA	cell division cycle 20 [Source:HGNC Symbol;Acc:HGNC:1723]	1764.906	-0.4767176	0.1949813	0.001565506	0.01019956	2377	1413	1752	1328	1696	1204	866	384	1310.942	1488.19	1800.257	1316.951	1492.193	1062.878	1036.867	355.3974	Down Regulated
ENSG00000266993	ENSG00000266993.3		51793934	51799154	1	lncRNA	novel transcript, antisense to NRD1	65.99984	0.4786457	0.1666099	0.000481301	0.0041886	85	47	53	51	75	71	56	106	46.87845	49.50101	54.45981	50.57568	65.98733	62.67802	67.04911	98.10449	Up Regulated
ENSG00000078618	ENSG00000078618.21	NRDC	51789191	51878805	-1	mRNA	nardilysin convertase [Source:HGNC Symbol;Acc:HGNC:7995]	3983.014	0.1953806	0.05626223	0.0002846141	0.00287616	6298	3211	3405	3659	4212	4564	3131	5004	3473.418	3381.867	3498.786	3628.557	3705.848	4029.049	3748.763	4631.273	Up Regulated
ENSG00000266993	ENSG00000266993.3		51793934	51799154	1	lncRNA	novel transcript, antisense to NRD1	65.99984	0.4786457	0.1666099	0.000481301	0.0041886	85	47	53	51	75	71	56	106	46.87845	49.50101	54.45981	50.57568	65.98733	62.67802	67.04911	98.10449	Up Regulated
ENSG00000117859	ENSG00000117859.19	OSBPL9	51577179	51798427	1	mRNA	oxysterol binding protein like 9 [Source:HGNC Symbol;Acc:HGNC:16386]	2955.46	0.2214136	0.0562994	4.040308e-05	0.0006721272	5317	2869	2702	2953	3459	3715	2567	4632	2932.385	3021.668	2776.423	2928.431	3043.336	3279.561	3073.483	4286.981	Up Regulated
ENSG00000229956	ENSG00000229956.10	ZRANB2-DT	71081324	71489976	1	lncRNA	ZRANB2 divergent transcript [Source:HGNC Symbol;Acc:HGNC:43595]	129.0246	0.6149929	0.1631812	1.51e-05	0.000319606	171	65	82	114	151	128	104	225	94.30842	68.45884	84.25858	113.0515	132.8545	112.997	124.5198	208.2407	Up Regulated
ENSG00000132485	ENSG00000132485.14	ZRANB2	71063291	71081289	-1	mRNA	zinc finger RANBP2-type containing 2 [Source:HGNC Symbol;Acc:HGNC:13058]	1678.941	0.2898939	0.09213959	0.0004446328	0.00396287	3398	1643	1711	2012	2071	2303	1770	3482	1874.035	1730.429	1758.127	1995.26	1822.13	2033.063	2119.231	3222.64	Up Regulated
ENSG00000237324	ENSG00000237324.3		74341579	74378802	-1	lncRNA	novel transcript	36.87594	0.6236266	0.2253673	0.000436566	0.00391128	53	28	27	43	54	58	38	75	29.23009	29.48996	27.74368	42.64224	47.51088	51.20176	45.49761	69.41356	Up Regulated
ENSG00000116783	ENSG00000116783.15	TNNI3K	74235387	74544428	1	mRNA	TNNI3 interacting kinase [Source:HGNC Symbol;Acc:HGNC:19661]	34.33925	0.6578438	0.2487936	0.0005725563	0.004768251	39	26	24	22	30	43	31	67	21.50894	27.38354	24.66105	21.81696	26.39493	37.95993	37.11647	62.00944	Up Regulated
ENSG00000237324	ENSG00000237324.3		74341579	74378802	-1	lncRNA	novel transcript	36.87594	0.6236266	0.2253673	0.000436566	0.00391128	53	28	27	43	54	58	38	75	29.23009	29.48996	27.74368	42.64224	47.51088	51.20176	45.49761	69.41356	Up Regulated
ENSG00000259030	ENSG00000259030.7	FPGT-TNNI3K	74198235	74544393	1	mRNA	FPGT-TNNI3K readthrough [Source:HGNC Symbol;Acc:HGNC:42952]	325.4668	0.490805	0.1262129	1.275052e-05	0.0002802906	567	264	336	391	415	452	383	752	312.7069	278.0482	345.2547	387.7469	365.1299	399.0206	458.568	695.9866	Up Regulated
ENSG00000233061	ENSG00000233061.1	TTLL7-IT1	83979118	83984300	-1	lncRNA	TTLL7 intronic transcript 1 [Source:HGNC Symbol;Acc:HGNC:41486]	29.60284	-0.9085456	0.2930918	0.000114181	0.001463242	99	32	58	13	19	22	17	24	54.59961	33.70281	59.59753	12.89184	16.71679	19.42136	20.35419	22.21234	Down Regulated
ENSG00000137941	ENSG00000137941.17	TTLL7	83865024	83999150	-1	mRNA	tubulin tyrosine ligase like 7 [Source:HGNC Symbol;Acc:HGNC:26242]	144.8033	-0.4696685	0.1496531	0.0002208517	0.002401467	365	141	227	125	122	126	83	184	201.3016	148.503	233.2524	123.96	107.3394	111.2314	99.37636	170.2946	Down Regulated
ENSG00000284882	ENSG00000284882.1		84574114	84583620	1	lncRNA	novel transcript	266.6807	0.2853669	0.102163	0.001546872	0.01011918	339	220	241	316	354	335	265	310	186.9623	231.7068	247.638	313.3709	311.4602	295.7343	317.286	286.9094	Up Regulated
ENSG00000117151	ENSG00000117151.13	CTBS	84549611	84574480	-1	mRNA	chitobiase [Source:HGNC Symbol;Acc:HGNC:2496]	572.774	0.2262803	0.08159022	0.002445518	0.01423713	955	520	530	577	639	657	507	919	526.6932	547.6707	544.5981	572.1994	562.212	579.9924	607.0339	850.5475	Up Regulated
ENSG00000236915	ENSG00000236915.2	CLCA4-AS1	86569024	86704484	-1	lncRNA	CLCA4 antisense RNA 1 [Source:HGNC Symbol;Acc:HGNC:54055]	166.5796	0.5793705	0.264436	0.001967891	0.01217168	32	131	95	144	178	149	157	188	17.64836	137.9709	97.61665	142.8019	156.6099	131.5356	187.977	173.9967	Up Regulated
ENSG00000153923	ENSG00000153923.10	CLCA3P	86634276	86654745	1	mRNA	chloride channel accessory 3, pseudogene [Source:HGNC Symbol;Acc:HGNC:2017]	130.2835	1.053425	0.2672136	3.875225e-06	0.0001135838	26	63	75	75	123	116	108	182	14.33929	66.35241	77.06577	74.376	108.2192	102.4035	129.309	168.4436	Up Regulated
ENSG00000236915	ENSG00000236915.2	CLCA4-AS1	86569024	86704484	-1	lncRNA	CLCA4 antisense RNA 1 [Source:HGNC Symbol;Acc:HGNC:54055]	166.5796	0.5793705	0.264436	0.001967891	0.01217168	32	131	95	144	178	149	157	188	17.64836	137.9709	97.61665	142.8019	156.6099	131.5356	187.977	173.9967	Up Regulated
ENSG00000016602	ENSG00000016602.9	CLCA4	86547078	86580754	1	mRNA	chloride channel accessory 4 [Source:HGNC Symbol;Acc:HGNC:2018]	70.77312	0.7119798	0.3059794	0.001053919	0.007548379	8	50	45	56	91	65	46	98	4.41209	52.66064	46.23946	55.53408	80.06463	57.38129	55.07605	90.70038	Up Regulated
ENSG00000267734	ENSG00000267734.1		86932199	86934891	-1	lncRNA	novel transcript, antisense to HS2ST1	78.69024	0.7581228	0.2512201	0.000150683	0.0018004	43	33	60	74	111	85	70	100	23.71498	34.75603	61.65262	73.38432	97.66125	75.03707	83.81138	92.55141	Up Regulated
ENSG00000153936	ENSG00000153936.17	HS2ST1	86914635	87109982	1	mRNA	heparan sulfate 2-O-sulfotransferase 1 [Source:HGNC Symbol;Acc:HGNC:5193]	4662.896	0.6419925	0.1380948	3.006523e-07	1.646051e-05	3405	4713	3882	5201	6107	6473	5087	9251	1877.896	4963.792	3988.925	5157.728	5373.128	5714.293	6090.693	8561.931	Up Regulated
ENSG00000273487	ENSG00000273487.1		92189237	92190707	1	lncRNA	novel transcript	13.48103	0.8109013	0.4068047	0.002091597	0.0127773	7	9	9	12	19	22	9	22	3.860578	9.478916	9.247893	11.90016	16.71679	19.42136	10.77575	20.36131	Up Regulated
ENSG00000189195	ENSG00000189195.13	BTBD8	92080305	92184725	1	mRNA	BTB domain containing 8 [Source:HGNC Symbol;Acc:HGNC:21019]	553.7267	0.4682679	0.1115735	3.674683e-06	0.0001083311	591	566	496	667	820	791	532	960	325.9431	596.1185	509.6617	661.4506	721.4615	698.2861	636.9665	888.4935	Up Regulated
ENSG00000223745	ENSG00000223745.7	CCDC18-AS1	93262186	93346025	-1	lncRNA	CCDC18 antisense RNA 1 [Source:HGNC Symbol;Acc:HGNC:52262]	1733.96	0.4041823	0.07221446	4.14e-09	6.95e-07	2984	1628	1760	2067	2577	2470	1857	3216	1645.709	1714.631	1808.477	2049.803	2267.325	2180.489	2223.396	2976.453	Up Regulated
ENSG00000122483	ENSG00000122483.17	CCDC18	93179919	93278730	1	mRNA	coiled-coil domain containing 18 [Source:HGNC Symbol;Acc:HGNC:30370]	1380.69	0.2022758	0.08040601	0.005987494	0.02732988	2335	1285	1450	1327	1610	1619	1229	2202	1287.779	1353.379	1489.938	1315.959	1416.528	1429.235	1471.488	2037.982	Up Regulated
ENSG00000261654	ENSG00000261654.1		110936369	110942353	-1	lncRNA	novel transcript, sense overlapping C1orf103	266.5667	0.2970127	0.1368519	0.007551691	0.03236758	251	193	207	151	198	217	175	347	138.4293	203.2701	212.7015	149.7437	174.2065	191.5652	209.5285	321.1534	Up Regulated
ENSG00000121931	ENSG00000121931.16	LRIF1	110947190	110963965	-1	mRNA	ligand dependent nuclear receptor interacting factor 1 [Source:HGNC Symbol;Acc:HGNC:30299]	1127.588	0.3760395	0.09268921	1.00583e-05	0.0002348586	1671	1091	1058	1210	1453	1486	1046	2061	921.5752	1149.055	1087.141	1199.933	1278.395	1311.824	1252.382	1907.485	Up Regulated
ENSG00000232811	ENSG00000232811.1		110943467	110952848	1	lncRNA	novel transcript	127.0475	0.418379	0.1495797	0.000765699	0.005952115	155	72	90	86	114	104	100	178	85.48424	75.83133	92.47893	85.28448	100.3007	91.81006	119.7305	164.7415	Up Regulated
ENSG00000121931	ENSG00000121931.16	LRIF1	110947190	110963965	-1	mRNA	ligand dependent nuclear receptor interacting factor 1 [Source:HGNC Symbol;Acc:HGNC:30299]	1127.588	0.3760395	0.09268921	1.00583e-05	0.0002348586	1671	1091	1058	1210	1453	1486	1046	2061	921.5752	1149.055	1087.141	1199.933	1278.395	1311.824	1252.382	1907.485	Up Regulated
ENSG00000260948	ENSG00000260948.1		111431046	111433068	-1	lncRNA	novel transcript, sense overlapping WDR77 & OVGP1	70.66863	0.6104623	0.1941973	0.000140744	0.001719062	128	73	63	86	113	114	83	197	70.59343	76.88454	64.73525	85.28448	99.42091	100.6379	99.37636	182.3263	Up Regulated
ENSG00000085465	ENSG00000085465.12	OVGP1	111414319	111427735	-1	mRNA	oviductal glycoprotein 1 [Source:HGNC Symbol;Acc:HGNC:8524]	75.01944	0.3422855	0.1565482	0.005503587	0.02575187	108	68	64	72	84	108	86	93	59.56321	71.61848	65.76279	71.40096	73.90581	95.34121	102.9683	86.07281	Up Regulated
ENSG00000231346	ENSG00000231346.5	LINC01160	111599655	111608723	-1	lncRNA	long intergenic non-protein coding RNA 1160 [Source:HGNC Symbol;Acc:HGNC:49525]	126.0123	0.4041826	0.1515661	0.001135863	0.008010817	126	120	129	130	180	184	132	155	69.49041	126.3855	132.5531	128.9184	158.3696	162.4332	158.0443	143.4547	Up Regulated
ENSG00000116473	ENSG00000116473.14	RAP1A	111542218	111716691	1	mRNA	RAP1A, member of RAS oncogene family [Source:HGNC Symbol;Acc:HGNC:9855]	2371.85	0.4690138	0.108664	2.23211e-06	7.408271e-05	3602	2198	1998	2483	2913	3043	2517	4574	1986.543	2314.962	2053.032	2462.342	2562.948	2686.327	3013.618	4233.301	Up Regulated
ENSG00000237993	ENSG00000237993.1		116013813	116017705	-1	lncRNA	novel transcript	98.11521	0.3802947	0.2084792	0.009213955	0.03740833	66	48	57	55	78	60	61	93	36.39974	50.55422	58.56999	54.5424	68.62682	52.96734	73.03563	86.07281	Up Regulated
ENSG00000163393	ENSG00000163393.13	SLC22A15	115976513	116070054	1	mRNA	solute carrier family 22 member 15 [Source:HGNC Symbol;Acc:HGNC:20301]	1550.293	0.5228186	0.1074371	1.366472e-07	9.01162e-06	1425	964	1067	1190	1643	1526	1188	1902	785.9035	1015.297	1096.389	1180.099	1445.562	1347.136	1422.399	1760.328	Up Regulated
ENSG00000231064	ENSG00000231064.7	THBS3-AS1	155194996	155205495	1	lncRNA	THBS3 antisense RNA 1 [Source:HGNC Symbol;Acc:HGNC:40582]	98.50922	-0.3381115	0.1775036	0.01243306	0.04630367	201	81	78	73	70	69	69	64	110.8538	85.31024	80.14841	72.39264	61.58817	60.91244	82.61408	59.2329	Down Regulated
ENSG00000173171	ENSG00000173171.14	MTX1	155208695	155213824	1	mRNA	metaxin 1 [Source:HGNC Symbol;Acc:HGNC:7504]	338.4816	-0.3242556	0.1054453	0.0005691306	0.00475141	896	392	439	352	398	444	320	229	494.154	412.8595	451.0917	349.0714	350.1728	391.9583	383.1378	211.9427	Down Regulated
ENSG00000231064	ENSG00000231064.7	THBS3-AS1	155194996	155205495	1	lncRNA	THBS3 antisense RNA 1 [Source:HGNC Symbol;Acc:HGNC:40582]	98.50922	-0.3381115	0.1775036	0.01243306	0.04630367	201	81	78	73	70	69	69	64	110.8538	85.31024	80.14841	72.39264	61.58817	60.91244	82.61408	59.2329	Down Regulated
ENSG00000169231	ENSG00000169231.13	THBS3	155195588	155209051	-1	mRNA	thrombospondin 3 [Source:HGNC Symbol;Acc:HGNC:11787]	690.973	-0.3074549	0.1326182	0.005033642	0.02415958	1215	591	605	621	671	649	465	260	670.0861	622.4488	621.6639	615.8333	590.3666	572.9301	556.7471	240.6337	Down Regulated
ENSG00000225855	ENSG00000225855.6	RUSC1-AS1	155316863	155324176	-1	lncRNA	RUSC1 antisense RNA 1 [Source:HGNC Symbol;Acc:HGNC:26680]	260.339	0.3206686	0.1251464	0.002036117	0.0124968	361	193	238	240	319	284	223	377	199.0955	203.2701	244.5554	238.0032	280.6661	250.7121	266.9991	348.9188	Up Regulated
ENSG00000160753	ENSG00000160753.16	RUSC1	155320894	155331114	1	mRNA	RUN and SH3 domain containing 1 [Source:HGNC Symbol;Acc:HGNC:17153]	594.1158	-0.8588413	0.1277202	1.290801e-12	2.016827e-09	1180	598	714	453	462	431	300	196	650.7832	629.8213	733.6662	449.2311	406.4819	380.4821	359.1916	181.4008	Down Regulated
ENSG00000272668	ENSG00000272668.2		159854870	159867685	1	lncRNA	novel transcript, antisense to VSIG8	145.8445	0.4688992	0.1680027	0.000612705	0.005042654	173	164	110	248	289	285	204	170	95.41144	172.7269	113.0298	245.9366	254.2712	251.5949	244.2503	157.3374	Up Regulated
ENSG00000256029	ENSG00000256029.6		159834474	159873053	-1	mRNA	novel protein	58.99843	0.8378835	0.2591757	6.682218e-05	0.0009999839	29	32	26	67	66	58	54	104	15.99382	33.70281	26.71614	66.44256	58.06885	51.20176	64.6545	96.25347	Up Regulated
ENSG00000229531	ENSG00000229531.5	RABGAP1L-AS1	174934947	174954261	-1	lncRNA	RABGAP1L antisense RNA 1 [Source:HGNC Symbol;Acc:HGNC:41057]	51.46095	0.6875224	0.302955	0.001327143	0.009006655	43	27	38	43	65	45	49	93	23.71498	28.43675	39.04666	42.64224	57.18902	39.72551	58.66797	86.07281	Up Regulated
ENSG00000152061	ENSG00000152061.23	RABGAP1L	174159410	174995308	1	mRNA	RAB GTPase activating protein 1 like [Source:HGNC Symbol;Acc:HGNC:24663]	4697.424	0.4441096	0.1024393	2.241459e-06	7.427163e-05	5222	3647	3782	4844	5721	5466	4209	7041	2879.992	3841.067	3886.17	4803.698	5033.513	4825.325	5039.459	6516.545	Up Regulated
ENSG00000279838	ENSG00000279838.1		185292384	185294372	-1	lncRNA	TEC	291.429	0.3500067	0.1383846	0.00227673	0.01350917	600	292	278	361	370	416	380	608	330.9067	307.5382	285.6571	357.9965	325.5375	367.2402	454.9761	562.7126	Up Regulated
ENSG00000116679	ENSG00000116679.16	IVNS1ABP	185296388	185317273	-1	mRNA	influenza virus NS1A binding protein [Source:HGNC Symbol;Acc:HGNC:16951]	8567.898	0.3388119	0.07677092	2.542613e-06	8.210741e-05	16408	8532	7496	9985	10913	11387	8951	16548	9049.196	8986.012	7702.467	9901.925	9601.596	10052.32	10717.08	15315.41	Up Regulated
ENSG00000279838	ENSG00000279838.1		185292384	185294372	-1	lncRNA	TEC	291.429	0.3500067	0.1383846	0.00227673	0.01350917	600	292	278	361	370	416	380	608	330.9067	307.5382	285.6571	357.9965	325.5375	367.2402	454.9761	562.7126	Up Regulated
ENSG00000116668	ENSG00000116668.13	SWT1	185157080	185291781	1	mRNA	SWT1 RNA endoribonuclease homolog [Source:HGNC Symbol;Acc:HGNC:16785]	488.8102	0.6806616	0.1110759	7.629282e-11	3.443688e-08	617	459	450	653	832	782	561	1131	340.2824	483.4247	462.3946	647.5671	732.0194	690.341	671.6884	1046.756	Up Regulated
ENSG00000285280	ENSG00000285280.1		192167786	192957713	-1	lncRNA	novel transcript	280.2061	0.323651	0.1336032	0.002995513	0.01655192	325	185	233	289	323	286	229	390	179.2411	194.8444	239.4177	286.5955	284.1854	252.4777	274.183	360.9505	Up Regulated
ENSG00000116741	ENSG00000116741.8	RGS2	192809039	192812275	1	mRNA	regulator of G protein signaling 2 [Source:HGNC Symbol;Acc:HGNC:9998]	3594.37	0.3539454	0.1209723	0.0007109818	0.005647815	7701	3703	3629	5835	5881	6563	4318	7778	4247.188	3900.047	3728.956	5786.453	5174.286	5793.744	5169.965	7198.649	Up Regulated
ENSG00000285280	ENSG00000285280.1		192167786	192957713	-1	lncRNA	novel transcript	280.2061	0.323651	0.1336032	0.002995513	0.01655192	325	185	233	289	323	286	229	390	179.2411	194.8444	239.4177	286.5955	284.1854	252.4777	274.183	360.9505	Up Regulated
ENSG00000127074	ENSG00000127074.14	RGS13	192636138	192660311	1	mRNA	regulator of G protein signaling 13 [Source:HGNC Symbol;Acc:HGNC:9995]	816.5616	0.7047418	0.2042696	4.039837e-05	0.0006721272	786	1042	758	1377	1583	1442	1280	2346	433.4878	1097.448	778.8781	1365.543	1392.773	1272.982	1532.551	2171.256	Up Regulated
ENSG00000285280	ENSG00000285280.1		192167786	192957713	-1	lncRNA	novel transcript	280.2061	0.323651	0.1336032	0.002995513	0.01655192	325	185	233	289	323	286	229	390	179.2411	194.8444	239.4177	286.5955	284.1854	252.4777	274.183	360.9505	Up Regulated
ENSG00000090104	ENSG00000090104.12	RGS1	192575763	192580024	1	mRNA	regulator of G protein signaling 1 [Source:HGNC Symbol;Acc:HGNC:9991]	24816.77	0.7676797	0.1561205	6.59146e-08	5.236499e-06	31196	27991	18791	40477	44823	50390	35625	65618	17204.94	29480.48	19308.57	40140.23	39436.67	44483.74	42654.01	60730.38	Up Regulated
ENSG00000203721	ENSG00000203721.6	LINC00862	200253419	200400705	-1	lncRNA	long intergenic non-protein coding RNA 862 [Source:HGNC Symbol;Acc:HGNC:21901]	82.80015	0.4278664	0.2284652	0.006671706	0.02954584	65	53	47	55	86	78	50	86	35.84823	55.82028	48.29455	54.5424	75.66547	68.85754	59.86527	79.59421	Up Regulated
ENSG00000162702	ENSG00000162702.8	ZNF281	200404940	200410056	-1	mRNA	zinc finger protein 281 [Source:HGNC Symbol;Acc:HGNC:13075]	4129.364	0.3470411	0.1016917	0.0001447969	0.001755889	5822	4309	3327	4497	5248	5499	4005	6564	3210.898	4538.294	3418.638	4459.585	4617.353	4854.457	4795.208	6075.075	Up Regulated
ENSG00000234915	ENSG00000234915.1		212299495	212331713	-1	lncRNA	novel transcript, antisense to PPP2R5A	18.68062	0.4540119	0.2938982	0.01019909	0.04023382	27	21	16	25	39	33	20	36	14.8908	22.11747	16.4407	24.792	34.31341	29.13204	23.94611	33.31851	Up Regulated
ENSG00000066027	ENSG00000066027.12	PPP2R5A	212285410	212361853	1	mRNA	protein phosphatase 2 regulatory subunit B alpha [Source:HGNC Symbol;Acc:HGNC:9309]	2367.617	0.1653233	0.0540477	0.001429236	0.009512009	4298	2626	2499	2946	3213	3289	2256	3810	2370.395	2765.737	2567.832	2921.489	2826.897	2903.493	2701.121	3526.209	Up Regulated
ENSG00000228063	ENSG00000228063.1	LYPLAL1-DT	218976672	219173961	-1	lncRNA	LYPLAL1 divergent transcript [Source:HGNC Symbol;Acc:HGNC:50560]	29.31363	0.5226398	0.206084	0.001068529	0.00764493	56	32	35	47	53	70	34	80	30.88463	33.70281	35.96403	46.60896	46.63105	61.79523	40.70839	74.04113	Up Regulated
ENSG00000143353	ENSG00000143353.12	LYPLAL1	219173869	219212865	1	mRNA	lysophospholipase like 1 [Source:HGNC Symbol;Acc:HGNC:20440]	1699.409	0.5339656	0.09150808	6.568616e-10	1.688883e-07	3374	1929	1781	2484	2851	3005	2289	4465	1860.799	2031.648	1830.055	2463.333	2508.398	2652.781	2740.632	4132.42	Up Regulated
ENSG00000286071	ENSG00000286071.1		231767464	231847803	-1	lncRNA	disrupted in schizophrenia 2	1186.906	0.331554	0.1678636	0.00936332	0.03785584	1671	760	919	971	1470	1068	1000	1555	921.5752	800.4418	944.3126	962.9213	1293.352	942.8187	1197.305	1439.174	Up Regulated
ENSG00000162946	ENSG00000162946.22	DISC1	231626790	232041272	1	mRNA	DISC1 scaffold protein [Source:HGNC Symbol;Acc:HGNC:2888]	3027.328	0.1499168	0.05801749	0.006716676	0.02969078	5754	2953	3360	3401	4188	3649	3003	4466	3173.395	3110.138	3452.547	3372.704	3684.732	3221.297	3595.508	4133.346	Up Regulated
ENSG00000229463	ENSG00000229463.2	LYST-AS1	235839483	235840182	1	lncRNA	LYST antisense RNA 1 [Source:HGNC Symbol;Acc:HGNC:41320]	161.6878	0.5975087	0.1952006	0.000177934	0.002035284	79	60	85	110	134	113	105	148	43.56939	63.19277	87.34121	109.0848	117.8974	99.75516	125.7171	136.9761	Up Regulated
ENSG00000143669	ENSG00000143669.13	LYST	235661041	235883724	-1	mRNA	lysosomal trafficking regulator [Source:HGNC Symbol;Acc:HGNC:1968]	30890.43	0.5111232	0.1089816	3.419032e-07	1.794506e-05	29958	23009	25579	31281	39202	35426	27894	47370	16522.17	24233.38	26283.54	31020.74	34491.14	31273.68	33397.64	43841.6	Up Regulated
ENSG00000233355	ENSG00000233355.7	CHRM3-AS2	239703381	239770130	-1	lncRNA	CHRM3 antisense RNA 2 [Source:HGNC Symbol;Acc:HGNC:43725]	575.4296	0.6621937	0.2156919	0.000156431	0.00185057	417	380	362	435	775	477	544	733	229.9802	400.2209	371.9708	431.3808	681.8691	421.0904	651.3342	678.4018	Up Regulated
ENSG00000133019	ENSG00000133019.11	CHRM3	239386565	239915452	1	mRNA	cholinergic receptor muscarinic 3 [Source:HGNC Symbol;Acc:HGNC:1952]	1584.271	0.3993375	0.1637798	0.002218684	0.01327811	1568	1713	1164	1764	2332	2044	1681	2118	864.7696	1804.154	1196.061	1749.324	2051.766	1804.421	2012.671	1960.239	Up Regulated
ENSG00000234601	ENSG00000234601.1	CHRM3-AS1	239898016	239899872	-1	lncRNA	CHRM3 antisense RNA 1 [Source:HGNC Symbol;Acc:HGNC:40150]	19.68026	0.6355542	0.3651286	0.004618288	0.02265006	17	14	9	13	26	23	14	25	9.375691	14.74498	9.247893	12.89184	22.87561	20.30415	16.76228	23.13785	Up Regulated
ENSG00000133019	ENSG00000133019.11	CHRM3	239386565	239915452	1	mRNA	cholinergic receptor muscarinic 3 [Source:HGNC Symbol;Acc:HGNC:1952]	1584.271	0.3993375	0.1637798	0.002218684	0.01327811	1568	1713	1164	1764	2332	2044	1681	2118	864.7696	1804.154	1196.061	1749.324	2051.766	1804.421	2012.671	1960.239	Up Regulated
ENSG00000235096	ENSG00000235096.2		246025897	246035603	1	lncRNA	novel transcript, antisense to SMYD3	108.2605	0.3986185	0.2304588	0.00901572	0.03678733	198	65	73	123	217	97	114	154	109.1992	68.45884	75.01069	121.9766	190.9233	85.63053	136.4928	142.5292	Up Regulated
ENSG00000185420	ENSG00000185420.19	SMYD3	245749342	246507312	-1	mRNA	SET and MYND domain containing 3 [Source:HGNC Symbol;Acc:HGNC:15513]	2029.679	0.3830252	0.09145341	5.585869e-06	0.0001493022	4483	2126	2323	3288	4082	3830	2824	3680	2472.425	2239.131	2386.984	3260.644	3591.47	3381.082	3381.191	3405.892	Up Regulated
ENSG00000226876	ENSG00000226876.3	SMYD3-AS1	246108626	246113866	1	lncRNA	SMYD3 antisense RNA 1 [Source:HGNC Symbol;Acc:HGNC:40708]	235.8132	0.7906247	0.2017943	5.04e-06	0.000138093	454	201	285	351	609	405	418	686	250.3861	211.6958	292.8499	348.0797	535.8171	357.5295	500.4737	634.9027	Up Regulated
ENSG00000185420	ENSG00000185420.19	SMYD3	245749342	246507312	-1	mRNA	SET and MYND domain containing 3 [Source:HGNC Symbol;Acc:HGNC:15513]	2029.679	0.3830252	0.09145341	5.585869e-06	0.0001493022	4483	2126	2323	3288	4082	3830	2824	3680	2472.425	2239.131	2386.984	3260.644	3591.47	3381.082	3381.191	3405.892	Up Regulated
ENSG00000224034	ENSG00000224034.1	LINC02561	5266033	5271236	-1	lncRNA	long intergenic non-protein coding RNA 2561 [Source:HGNC Symbol;Acc:HGNC:53601]	16.63738	0.7061974	0.3848953	0.003223601	0.01751579	24	6	16	21	28	30	24	34	13.23627	6.319277	16.4407	20.82528	24.63527	26.48367	28.73533	31.46748	Up Regulated
ENSG00000215267	ENSG00000215267.8	AKR1C7P	5275173	5288470	-1	mRNA	aldo-keto reductase family 1 member C7, pseudogene [Source:HGNC Symbol;Acc:HGNC:44681]	22.96707	0.6423485	0.2618341	0.0009417067	0.006930415	26	21	24	30	42	38	29	50	14.33929	22.11747	24.66105	29.7504	36.9529	33.54598	34.72186	46.27571	Up Regulated
ENSG00000226647	ENSG00000226647.2		5712174	5744067	-1	lncRNA	novel transcript	27.49815	0.6985306	0.3556185	0.002568869	0.01474185	15	9	15	16	23	14	15	43	8.272668	9.478916	15.41315	15.86688	20.23611	12.35905	17.95958	39.79711	Up Regulated
ENSG00000108021	ENSG00000108021.20	TASOR2	5684731	5763779	1	mRNA	transcription activation suppressor family member 2 [Source:HGNC Symbol;Acc:HGNC:23484]	2405.343	0.2780518	0.07663914	9.666941e-05	0.001296928	3371	1537	1621	1906	2131	2176	1816	2903	1859.144	1618.788	1665.648	1890.142	1874.92	1920.949	2174.307	2686.767	Up Regulated
ENSG00000230322	ENSG00000230322.1		11168922	11171376	-1	lncRNA	novel transcript	155.3729	0.4462241	0.1907751	0.001904033	0.01187799	166	80	108	125	156	144	121	210	91.55086	84.25703	110.9747	123.96	137.2536	127.1216	144.874	194.358	Up Regulated
ENSG00000048740	ENSG00000048740.18	CELF2	10798397	11336675	1	mRNA	CUGBP Elav-like family member 2 [Source:HGNC Symbol;Acc:HGNC:2550]	6373.503	0.1906352	0.04644252	2.320496e-05	0.0004442404	7057	3900	4096	4782	5859	5197	3918	5372	3892.015	4107.53	4208.819	4742.214	5154.93	4587.854	4691.043	4971.862	Up Regulated
ENSG00000181800	ENSG00000181800.5	CELF2-AS1	11316833	11319884	-1	lncRNA	CELF2 antisense RNA 1 [Source:HGNC Symbol;Acc:HGNC:23515]	497.143	0.3087435	0.1225312	0.002952823	0.01637841	378	211	226	224	347	284	258	292	208.4712	222.2279	232.2249	222.1363	305.3014	250.7121	308.9048	270.2501	Up Regulated
ENSG00000048740	ENSG00000048740.18	CELF2	10798397	11336675	1	mRNA	CUGBP Elav-like family member 2 [Source:HGNC Symbol;Acc:HGNC:2550]	6373.503	0.1906352	0.04644252	2.320496e-05	0.0004442404	7057	3900	4096	4782	5859	5197	3918	5372	3892.015	4107.53	4208.819	4742.214	5154.93	4587.854	4691.043	4971.862	Up Regulated
ENSG00000239665	ENSG00000239665.8	AL157392.3	13631143	13668445	1	lncRNA	novel transcript	632.0479	0.4322797	0.1192438	4.42e-05	0.000721713	541	279	300	432	583	469	387	490	298.3676	293.8464	308.2631	428.4058	512.9415	414.028	463.3572	453.5019	Up Regulated
ENSG00000151474	ENSG00000151474.23	FRMD4A	13643706	14462142	-1	mRNA	FERM domain containing 4A [Source:HGNC Symbol;Acc:HGNC:25491]	1043.264	0.2463285	0.08959061	0.002297588	0.0135971	1287	703	710	875	1021	1200	920	678	709.7949	740.4087	729.556	867.72	898.3075	1059.347	1101.521	627.4986	Up Regulated
ENSG00000238280	ENSG00000238280.2		62682652	62805887	-1	lncRNA	novel transcript	30.55555	0.8595498	0.2860002	0.000147526	0.001776724	21	16	11	31	41	33	25	45	11.58174	16.85141	11.30298	30.74208	36.07307	29.13204	29.93264	41.64813	Up Regulated
ENSG00000181915	ENSG00000181915.4	ADO	62804720	62808479	1	mRNA	2-aminoethanethiol dioxygenase [Source:HGNC Symbol;Acc:HGNC:23506]	1340.159	0.3580994	0.1082572	0.0001966474	0.002199505	1438	1160	935	1561	1530	1548	1111	2046	793.0731	1221.727	960.7533	1548.013	1346.142	1366.557	1330.206	1893.602	Up Regulated
ENSG00000221817	ENSG00000221817.9	PPP3CB-AS1	73495525	73520070	1	lncRNA	PPP3CB antisense RNA 1 (head to head) [Source:HGNC Symbol;Acc:HGNC:50750]	222.1496	0.3755309	0.09122097	1.06e-05	0.000244928	365	154	197	248	296	265	203	357	201.3016	162.1948	202.4261	245.9366	260.43	233.9391	243.053	330.4085	Up Regulated
ENSG00000166348	ENSG00000166348.18	USP54	73497538	73626117	-1	mRNA	ubiquitin specific peptidase 54 [Source:HGNC Symbol;Acc:HGNC:23513]	267.1014	-0.2447542	0.1025323	0.006395876	0.0286152	351	193	201	169	179	170	143	169	193.5804	203.2701	206.5363	167.5939	157.4898	150.0741	171.2147	156.4119	Down Regulated
ENSG00000221817	ENSG00000221817.9	PPP3CB-AS1	73495525	73520070	1	lncRNA	PPP3CB antisense RNA 1 (head to head) [Source:HGNC Symbol;Acc:HGNC:50750]	222.1496	0.3755309	0.09122097	1.06e-05	0.000244928	365	154	197	248	296	265	203	357	201.3016	162.1948	202.4261	245.9366	260.43	233.9391	243.053	330.4085	Up Regulated
ENSG00000107758	ENSG00000107758.15	PPP3CB	73436433	73496024	-1	mRNA	protein phosphatase 3 catalytic subunit beta [Source:HGNC Symbol;Acc:HGNC:9315]	784.9647	0.4713988	0.07980829	5.152036e-10	1.453447e-07	725	358	398	441	552	556	481	788	399.8456	377.0502	408.9624	437.3309	485.6667	490.8307	575.9039	729.3051	Up Regulated
ENSG00000232342	ENSG00000232342.7		74506081	74530553	-1	lncRNA	novel transcript	68.52319	0.4059408	0.2677474	0.01140151	0.04351511	57	30	47	58	76	55	48	89	31.43614	31.59639	48.29455	57.51744	66.86716	48.5534	57.47066	82.37075	Up Regulated
ENSG00000156110	ENSG00000156110.13	ADK	74151202	74709963	1	mRNA	adenosine kinase [Source:HGNC Symbol;Acc:HGNC:257]	1079.88	0.4500011	0.1183421	2.076293e-05	0.0004098509	1540	973	948	1405	1488	1650	1178	1922	849.3273	1024.776	974.1114	1393.31	1309.189	1456.602	1410.426	1778.838	Up Regulated
ENSG00000237149	ENSG00000237149.5	ZNF503-AS2	75401519	75408982	1	lncRNA	ZNF503 antisense RNA 2 [Source:HGNC Symbol;Acc:HGNC:23525]	35.36362	-0.5335612	0.3143442	0.006623249	0.02938009	64	25	16	18	32	13	12	5	35.29672	26.33032	16.4407	17.85024	28.15459	11.47626	14.36767	4.627571	Down Regulated
ENSG00000165655	ENSG00000165655.17	ZNF503	75397830	75401764	-1	mRNA	zinc finger protein 503 [Source:HGNC Symbol;Acc:HGNC:23589]	101.228	-0.4953258	0.2323772	0.003324323	0.01794887	212	45	46	30	50	56	36	28	116.9204	47.39458	47.26701	29.7504	43.99155	49.43618	43.103	25.91439	Down Regulated
ENSG00000224596	ENSG00000224596.7	ZMIZ1-AS1	78943328	79067895	-1	lncRNA	ZMIZ1 antisense RNA 1 [Source:HGNC Symbol;Acc:HGNC:27433]	485.2937	0.4745152	0.1562624	0.000290204	0.002921024	424	206	231	447	450	444	376	442	233.8408	216.9619	237.3626	443.281	395.924	391.9583	450.1869	409.0772	Up Regulated
ENSG00000108175	ENSG00000108175.17	ZMIZ1	79068966	79316519	1	mRNA	zinc finger MIZ-type containing 1 [Source:HGNC Symbol;Acc:HGNC:16493]	3267.471	0.308456	0.1434127	0.007416067	0.03191423	2322	1200	936	1673	2258	2072	1699	938	1280.609	1263.855	961.7809	1659.081	1986.659	1829.139	2034.222	868.1322	Up Regulated
ENSG00000277687	ENSG00000277687.1		118692361	118693535	-1	lncRNA	novel transcript, sense intronic to CACUL1	82.79647	0.4438495	0.1876155	0.002146863	0.01301704	80	31	58	58	65	62	49	119	44.1209	32.6496	59.59753	57.51744	57.18902	54.73292	58.66797	110.1362	Up Regulated
ENSG00000151893	ENSG00000151893.15	CACUL1	118674167	118755249	-1	mRNA	CDK2 associated cullin domain 1 [Source:HGNC Symbol;Acc:HGNC:23727]	2280.251	0.2027512	0.06503865	0.0009488809	0.006978157	2778	1608	1627	1774	1933	1983	1474	2706	1532.098	1693.566	1671.814	1759.24	1700.713	1750.571	1764.828	2504.441	Up Regulated
ENSG00000273599	ENSG00000273599.1		124996064	125001491	1	lncRNA	novel transcript, antisense to CTBP2	110.5609	-0.3957729	0.1998053	0.006606709	0.02933234	98	43	62	46	53	55	35	10	54.0481	45.28815	63.70771	45.61728	46.63105	48.5534	41.90569	9.255141	Down Regulated
ENSG00000175029	ENSG00000175029.17	CTBP2	124984317	125161170	-1	mRNA	C-terminal binding protein 2 [Source:HGNC Symbol;Acc:HGNC:2495]	534.6365	-0.2283365	0.07032071	0.0005276928	0.004499789	718	369	331	354	341	378	288	299	395.985	388.6356	340.117	351.0547	300.0224	333.6942	344.824	276.7287	Down Regulated
ENSG00000246273	ENSG00000246273.7	SBF2-AS1	9758268	9811335	1	lncRNA	SBF2 antisense RNA 1 [Source:HGNC Symbol;Acc:HGNC:27438]	224.7582	0.3933189	0.09490253	6.37e-06	0.000165797	398	216	230	312	347	404	243	395	219.5015	227.494	236.335	309.4042	305.3014	356.6468	290.9452	365.5781	Up Regulated
ENSG00000133812	ENSG00000133812.15	SBF2	9776776	10304877	-1	mRNA	SET binding factor 2 [Source:HGNC Symbol;Acc:HGNC:2135]	963.2062	0.2539228	0.06573134	2.880312e-05	0.0005205061	1374	687	834	923	1072	1021	778	1243	757.7764	723.5573	856.9714	915.3207	943.1789	901.3276	931.5037	1150.414	Up Regulated
ENSG00000245573	ENSG00000245573.8	BDNF-AS	27506830	27698231	1	lncRNA	BDNF antisense RNA [Source:HGNC Symbol;Acc:HGNC:20608]	221.2703	0.2308684	0.08504556	0.002817428	0.01578257	363	176	202	245	269	251	214	306	200.1986	185.3655	207.5638	242.9616	236.6746	221.58	256.2234	283.2073	Up Regulated
ENSG00000176697	ENSG00000176697.19	BDNF	27654893	27722058	-1	mRNA	brain derived neurotrophic factor [Source:HGNC Symbol;Acc:HGNC:1033]	48.5901	0.4249182	0.2261742	0.006764516	0.02985677	43	20	35	33	51	30	36	56	23.71498	21.06426	35.96403	32.72544	44.87138	26.48367	43.103	51.82879	Up Regulated
ENSG00000246250	ENSG00000246250.2		43827517	43880726	-1	lncRNA	novel transcript	118.2956	0.485673	0.1656422	0.00044324	0.003953926	165	69	77	82	127	104	95	177	90.99935	72.67169	79.12086	81.31776	111.7385	91.81006	113.744	163.816	Up Regulated
ENSG00000149084	ENSG00000149084.13	HSD17B12	43680680	43856617	1	mRNA	hydroxysteroid 17-beta dehydrogenase 12 [Source:HGNC Symbol;Acc:HGNC:18646]	1661.07	0.2016658	0.06645211	0.001261887	0.008656348	3638	1759	1689	1986	2264	2239	1800	2886	2006.398	1852.601	1735.521	1969.477	1991.938	1976.565	2155.15	2671.034	Up Regulated
ENSG00000250659	ENSG00000250659.2		62537312	62542018	1	lncRNA	novel transcript	58.55177	-0.7470285	0.2256199	7.01e-05	0.001036635	131	58	82	44	43	47	34	28	72.24797	61.08635	84.25858	43.63392	37.83274	41.49108	40.70839	25.91439	Down Regulated
ENSG00000124942	ENSG00000124942.14	AHNAK	62433542	62556235	-1	mRNA	AHNAK nucleoprotein [Source:HGNC Symbol;Acc:HGNC:347]	60575.23	0.3888013	0.09972038	1.836319e-05	0.0003752446	71702	45754	52724	71260	79020	83879	65726	67231	39544.46	48188.7	54176.21	70667.12	69524.25	74047.46	78694.1	62223.24	Up Regulated
ENSG00000255717	ENSG00000255717.6	SNHG1	62851978	62855953	-1	lncRNA	small nucleolar RNA host gene 1 [Source:HGNC Symbol;Acc:HGNC:32688]	880.5913	-0.3667744	0.1215324	0.000503453	0.004333108	2688	831	1013	756	814	770	599	1086	1482.462	875.2199	1040.902	749.7101	716.1825	679.7475	717.186	1005.108	Down Regulated
ENSG00000168003	ENSG00000168003.16	SLC3A2	62856004	62888880	1	mRNA	solute carrier family 3 member 2 [Source:HGNC Symbol;Acc:HGNC:11026]	3515.428	-0.5093284	0.1028285	9.339877e-08	6.564414e-06	6700	3060	3005	2943	2897	3069	2057	1261	3695.125	3222.831	3087.769	2918.514	2548.871	2709.279	2462.857	1167.073	Down Regulated
ENSG00000255468	ENSG00000255468.7	B4GAT1-DT	66347950	66364804	1	lncRNA	B4GAT1 divergent transcript [Source:HGNC Symbol;Acc:HGNC:56070]	27.72036	-0.5894328	0.3081952	0.003889286	0.01998967	49	26	18	22	18	15	8	17	27.02405	27.38354	18.49579	21.81696	15.83696	13.24184	9.578444	15.73374	Down Regulated
ENSG00000174744	ENSG00000174744.14	BRMS1	66337333	66345125	-1	mRNA	BRMS1 transcriptional repressor and anoikis regulator [Source:HGNC Symbol;Acc:HGNC:17262]	733.8176	-0.5157959	0.1912585	0.0006978941	0.005580131	1761	889	850	753	808	887	574	134	971.2112	936.3063	873.4121	746.7351	710.9035	783.0338	687.2533	124.0189	Down Regulated
ENSG00000255517	ENSG00000255517.6	DPP3-DT	66473490	66480296	-1	lncRNA	DPP3 divergent transcript [Source:HGNC Symbol;Acc:HGNC:55494]	129.3356	-0.6694114	0.197732	5.49e-05	0.000855021	460	166	218	151	147	168	130	48	253.6952	174.8333	224.0045	149.7437	129.3352	148.3086	155.6497	44.42468	Down Regulated
ENSG00000254986	ENSG00000254986.7	DPP3	66480013	66509657	1	mRNA	dipeptidyl peptidase 3 [Source:HGNC Symbol;Acc:HGNC:3008]	1328.488	-0.3577655	0.1432863	0.002369128	0.013904	2369	1244	1272	1295	1240	1392	1023	360	1306.53	1310.197	1307.036	1284.226	1090.991	1228.842	1224.844	333.1851	Down Regulated
ENSG00000255517	ENSG00000255517.6	DPP3-DT	66473490	66480296	-1	lncRNA	DPP3 divergent transcript [Source:HGNC Symbol;Acc:HGNC:55494]	129.3356	-0.6694114	0.197732	5.49e-05	0.000855021	460	166	218	151	147	168	130	48	253.6952	174.8333	224.0045	149.7437	129.3352	148.3086	155.6497	44.42468	Down Regulated
ENSG00000174516	ENSG00000174516.15	PELI3	66466327	66477337	1	mRNA	pellino E3 ubiquitin protein ligase family member 3 [Source:HGNC Symbol;Acc:HGNC:30010]	406.747	-0.8877328	0.1967652	4.142872e-07	2.072661e-05	1719	566	692	492	489	496	361	120	948.0478	596.1185	711.0602	487.9066	430.2374	437.8633	432.2273	111.0617	Down Regulated
ENSG00000246889	ENSG00000246889.2	CTTN-DT	70372246	70398488	-1	lncRNA	CTTN divergent transcript [Source:HGNC Symbol;Acc:HGNC:55592]	34.58964	0.4115605	0.2177283	0.007141419	0.03105031	53	19	22	25	42	34	33	43	29.23009	20.01105	22.60596	24.792	36.9529	30.01483	39.51108	39.79711	Up Regulated
ENSG00000085733	ENSG00000085733.16	CTTN	70398404	70436584	1	mRNA	cortactin [Source:HGNC Symbol;Acc:HGNC:3338]	446.9034	0.4337413	0.1967929	0.003280021	0.01775427	231	180	159	328	326	409	285	195	127.3991	189.5783	163.3794	325.2711	286.8249	361.0607	341.2321	180.4752	Up Regulated
ENSG00000285921	ENSG00000285921.1		96092374	96137827	1	lncRNA	novel transcript	73.64024	0.5712991	0.2019354	0.000397945	0.003652533	90	75	66	73	127	87	79	150	49.63601	78.99097	67.81788	72.39264	111.7385	76.80264	94.58713	138.8271	Up Regulated
ENSG00000184384	ENSG00000184384.14	MAML2	95976598	96343195	-1	mRNA	mastermind like transcriptional coactivator 2 [Source:HGNC Symbol;Acc:HGNC:16259]	3720.938	0.4737679	0.09250671	4.328029e-08	3.855742e-06	3963	3166	2834	4168	4819	4679	3568	5497	2185.639	3334.472	2912.059	4133.322	4239.906	4130.57	4271.986	5087.551	Up Regulated
ENSG00000255422	ENSG00000255422.3		118700415	118750263	1	lncRNA	novel transcript	132.6463	-0.4650096	0.2154604	0.003243628	0.01759738	622	232	227	201	185	207	160	154	343.04	244.3454	233.2524	199.3277	162.7687	182.7373	191.5689	142.5292	Down Regulated
ENSG00000110367	ENSG00000110367.13	DDX6	118747763	118791164	-1	mRNA	DEAD-box helicase 6 [Source:HGNC Symbol;Acc:HGNC:2747]	5649.815	0.2390618	0.08288973	0.001610074	0.01041609	8951	4802	5148	5322	6057	6457	4827	8487	4936.577	5057.528	5289.795	5277.721	5329.137	5700.169	5779.394	7854.838	Up Regulated
ENSG00000261799	ENSG00000261799.1		273954	277123	-1	lncRNA	novel transcript	128.0765	0.3110612	0.1288576	0.003637175	0.01912548	166	85	116	118	126	145	107	181	91.55086	89.5231	119.1951	117.0182	110.8587	128.0044	128.1117	167.5181	Up Regulated
ENSG00000073614	ENSG00000073614.12	KDM5A	280057	389320	-1	mRNA	lysine demethylase 5A [Source:HGNC Symbol;Acc:HGNC:9886]	2157.284	0.291654	0.05086398	3.218965e-09	6.054038e-07	3445	1872	2028	2365	2656	2716	2041	3264	1899.956	1971.615	2083.859	2345.323	2336.831	2397.655	2443.7	3020.878	Up Regulated
ENSG00000285704	ENSG00000285704.1		865288	867139	-1	lncRNA	novel transcript, antisense to WNK1	97.75765	0.7495369	0.193417	7.58e-06	0.000188799	76	34	43	67	91	61	69	126	41.91485	35.80924	44.18438	66.44256	80.06463	53.85013	82.61408	116.6148	Up Regulated
ENSG00000060237	ENSG00000060237.17	WNK1	752579	911452	1	mRNA	WNK lysine deficient protein kinase 1 [Source:HGNC Symbol;Acc:HGNC:14540]	12547.89	0.3056877	0.0742521	1.130788e-05	0.0002557747	13539	7190	7101	8581	10686	10476	8006	11214	7466.91	7572.601	7296.588	8509.606	9401.875	9248.098	9585.628	10378.72	Up Regulated
ENSG00000257027	ENSG00000257027.1		9658567	9662085	1	lncRNA	novel transcript	587.5134	0.3701382	0.1127279	0.000200026	0.002229877	764	545	593	714	882	781	625	916	421.3546	574.001	609.3334	708.0595	776.011	689.4582	748.3159	847.7709	Up Regulated
ENSG00000069493	ENSG00000069493.15	CLEC2D	9664969	9699553	1	mRNA	C-type lectin domain family 2 member D [Source:HGNC Symbol;Acc:HGNC:14351]	726.3574	0.4560112	0.1274968	4.211248e-05	0.000693746	943	611	683	833	1012	953	777	1248	520.0751	643.5131	701.8123	826.0695	890.389	841.2979	930.3064	1155.042	Up Regulated
ENSG00000257027	ENSG00000257027.1		9658567	9662085	1	lncRNA	novel transcript	587.5134	0.3701382	0.1127279	0.000200026	0.002229877	764	545	593	714	882	781	625	916	421.3546	574.001	609.3334	708.0595	776.011	689.4582	748.3159	847.7709	Up Regulated
ENSG00000256594	ENSG00000256594.8		9653683	9657043	1	mRNA	C-type lectin domain family 2 (CLEC2) pseudogene	155.4801	0.37952	0.12352	0.0004103227	0.003727885	222	161	118	184	202	221	160	246	122.4355	169.5673	121.2502	182.4691	177.7259	195.0964	191.5689	227.6765	Up Regulated
ENSG00000256973	ENSG00000256973.1		22460519	22463914	-1	lncRNA	novel transcript	47.28114	0.5359518	0.252424	0.00287573	0.0160164	66	24	39	31	54	61	44	66	36.39974	25.27711	40.0742	30.74208	47.51088	53.85013	52.68144	61.08393	Up Regulated
ENSG00000111731	ENSG00000111731.12	C2CD5	22448583	22544546	-1	mRNA	C2 calcium dependent domain containing 5 [Source:HGNC Symbol;Acc:HGNC:29062]	1184.564	0.304237	0.07908425	3.531202e-05	0.0006050401	2336	1085	1171	1242	1516	1547	1144	2195	1288.33	1142.736	1203.254	1231.667	1333.824	1365.675	1369.717	2031.503	Up Regulated
ENSG00000273989	ENSG00000273989.1		28236227	28236828	1	lncRNA	novel transcript, sense intronic to CCDC91	16.50723	0.5949697	0.5102974	0.008817401	0.03621821	15	5	10	16	10	15	12	46	8.272668	5.266064	10.27544	15.86688	8.798311	13.24184	14.36767	42.57365	Up Regulated
ENSG00000123106	ENSG00000123106.10	CCDC91	28133249	28581511	1	mRNA	coiled-coil domain containing 91 [Source:HGNC Symbol;Acc:HGNC:24855]	848.0291	0.3436361	0.09193266	4.366603e-05	0.0007147014	1382	740	726	878	1017	1042	750	1479	762.1885	779.3775	745.9967	870.6951	894.7882	919.8661	897.9791	1368.835	Up Regulated
ENSG00000257258	ENSG00000257258.1		29142969	29158537	-1	lncRNA	novel transcript	379.283	0.5813362	0.1893869	0.000185798	0.002107158	266	432	380	498	685	584	471	722	146.702	454.988	390.4666	493.8567	602.6843	515.5488	563.9309	668.2212	Up Regulated
ENSG00000064763	ENSG00000064763.11	FAR2	29149016	29341121	1	mRNA	fatty acyl-CoA reductase 2 [Source:HGNC Symbol;Acc:HGNC:25531]	4419.162	0.3144774	0.1140836	0.001472468	0.0097518	3543	3059	2819	3340	4261	3664	2854	4518	1954.004	3221.778	2896.646	3312.211	3748.96	3234.539	3417.11	4181.473	Up Regulated
ENSG00000275278	ENSG00000275278.1		29156448	29156991	-1	lncRNA	novel transcript, antisense to FAR2	397.0524	0.5289486	0.1764368	0.000269224	0.002768846	270	390	333	452	609	481	407	648	148.908	410.753	342.172	448.2394	535.8171	424.6215	487.3033	599.7331	Up Regulated
ENSG00000064763	ENSG00000064763.11	FAR2	29149016	29341121	1	mRNA	fatty acyl-CoA reductase 2 [Source:HGNC Symbol;Acc:HGNC:25531]	4419.162	0.3144774	0.1140836	0.001472468	0.0097518	3543	3059	2819	3340	4261	3664	2854	4518	1954.004	3221.778	2896.646	3312.211	3748.96	3234.539	3417.11	4181.473	Up Regulated
ENSG00000275476	ENSG00000275476.1		29277397	29277882	-1	lncRNA	novel transcript, antisense to FAR2	71.85943	0.3864091	0.2304618	0.0118509	0.04471773	57	26	31	38	61	49	29	58	31.43614	27.38354	31.85385	37.68384	53.66969	43.25666	34.72186	53.67982	Up Regulated
ENSG00000064763	ENSG00000064763.11	FAR2	29149016	29341121	1	mRNA	fatty acyl-CoA reductase 2 [Source:HGNC Symbol;Acc:HGNC:25531]	4419.162	0.3144774	0.1140836	0.001472468	0.0097518	3543	3059	2819	3340	4261	3664	2854	4518	1954.004	3221.778	2896.646	3312.211	3748.96	3234.539	3417.11	4181.473	Up Regulated
ENSG00000257176	ENSG00000257176.2		29277955	29317848	-1	lncRNA	novel transcript, antisense to FAR2	428.1773	0.553377	0.1200623	4.38e-07	2.14e-05	367	210	269	274	440	339	267	484	202.4046	221.1747	276.4092	271.7203	387.1257	299.2655	319.6806	447.9488	Up Regulated
ENSG00000064763	ENSG00000064763.11	FAR2	29149016	29341121	1	mRNA	fatty acyl-CoA reductase 2 [Source:HGNC Symbol;Acc:HGNC:25531]	4419.162	0.3144774	0.1140836	0.001472468	0.0097518	3543	3059	2819	3340	4261	3664	2854	4518	1954.004	3221.778	2896.646	3312.211	3748.96	3234.539	3417.11	4181.473	Up Regulated
ENSG00000274315	ENSG00000274315.1		29331434	29331936	-1	lncRNA	novel transcript, antisense to FAR2	105.4424	0.3217	0.1578373	0.008777561	0.03608375	105	65	67	70	82	87	65	129	57.90868	68.45884	68.84543	69.4176	72.14615	76.80264	77.82486	119.3913	Up Regulated
ENSG00000064763	ENSG00000064763.11	FAR2	29149016	29341121	1	mRNA	fatty acyl-CoA reductase 2 [Source:HGNC Symbol;Acc:HGNC:25531]	4419.162	0.3144774	0.1140836	0.001472468	0.0097518	3543	3059	2819	3340	4261	3664	2854	4518	1954.004	3221.778	2896.646	3312.211	3748.96	3234.539	3417.11	4181.473	Up Regulated
ENSG00000257456	ENSG00000257456.1		29519731	29529974	1	lncRNA	novel transcript	20.92926	0.7563723	0.4182096	0.003070909	0.01685391	13	4	9	8	14	16	6	27	7.169646	4.212852	9.247893	7.93344	12.31763	14.12462	7.183833	24.98888	Up Regulated
ENSG00000133687	ENSG00000133687.16	TMTC1	29500840	29784759	-1	mRNA	transmembrane O-mannosyltransferase targeting cadherins 1 [Source:HGNC Symbol;Acc:HGNC:24099]	7769.886	0.3045533	0.08839029	0.0001628148	0.001905406	6399	3872	3363	4681	5138	5339	4115	6038	3529.12	4078.04	3455.629	4642.054	4520.572	4713.21	4926.912	5588.254	Up Regulated
ENSG00000247774	ENSG00000247774.6	PCED1B-AS1	47205893	47216487	-1	lncRNA	PCED1B antisense RNA 1 [Source:HGNC Symbol;Acc:HGNC:44166]	473.5015	-0.5399204	0.1458064	2.3e-05	0.000441116	1157	664	581	421	451	509	332	335	638.0985	699.3334	597.0029	417.4973	396.8038	449.3396	397.5054	310.0472	Down Regulated
ENSG00000179715	ENSG00000179715.13	PCED1B	47079603	47236662	1	mRNA	PC-esterase domain containing 1B [Source:HGNC Symbol;Acc:HGNC:28255]	207.6326	-0.4961793	0.1556195	0.0001649073	0.001922845	489	306	287	180	222	223	179	124	269.689	322.2831	294.905	178.5024	195.3225	196.8619	214.3177	114.7637	Down Regulated
ENSG00000277895	ENSG00000277895.1		64451591	64452901	-1	lncRNA	novel transcript, antisense to TBK1	50.89787	0.4320266	0.2707568	0.010485	0.0410666	39	26	21	22	42	30	28	48	21.50894	27.38354	21.57842	21.81696	36.9529	26.48367	33.52455	44.42468	Up Regulated
ENSG00000183735	ENSG00000183735.10	TBK1	64452090	64502114	1	mRNA	TANK binding kinase 1 [Source:HGNC Symbol;Acc:HGNC:11584]	1606.272	0.1984681	0.0850648	0.009980871	0.03965019	2543	1614	1496	1666	1762	1841	1372	2716	1402.493	1699.886	1537.205	1652.139	1550.262	1625.215	1642.703	2513.696	Up Regulated
ENSG00000197301	ENSG00000197301.7	HMGA2-AS1	65851340	65882167	-1	lncRNA	HMGA2 antisense RNA 1 [Source:HGNC Symbol;Acc:HGNC:53973]	881.2604	0.3881143	0.1616402	0.002565089	0.01473059	649	928	796	907	1203	1020	847	1338	357.9308	977.3816	817.9248	899.4538	1058.437	900.4448	1014.118	1238.338	Up Regulated
ENSG00000149948	ENSG00000149948.13	HMGA2	65824460	65966291	1	mRNA	high mobility group AT-hook 2 [Source:HGNC Symbol;Acc:HGNC:5009]	954.896	0.4669	0.2281697	0.004008573	0.02044387	290	482	270	312	426	449	441	651	159.9382	507.6486	277.4368	309.4042	374.808	396.3723	528.0117	602.5097	Up Regulated
ENSG00000257815	ENSG00000257815.5	PRANCR	69901918	70243405	-1	lncRNA	progenitor renewal associated non-coding RNA [Source:HGNC Symbol;Acc:HGNC:51126]	109.5159	0.3851577	0.1563715	0.001778727	0.01127637	173	84	114	121	144	132	114	218	95.41144	88.46988	117.14	119.9933	126.6957	116.5281	136.4928	201.7621	Up Regulated
ENSG00000111596	ENSG00000111596.12	CNOT2	70243002	70354993	1	mRNA	CCR4-NOT transcription complex subunit 2 [Source:HGNC Symbol;Acc:HGNC:7878]	2354.202	0.2057497	0.06076272	0.0003669784	0.003452554	4130	2255	2131	2617	2784	2858	2107	3750	2277.741	2374.995	2189.696	2595.227	2449.45	2523.011	2522.723	3470.678	Up Regulated
ENSG00000279530	ENSG00000279530.2		70321542	70324274	-1	lncRNA	TEC	342.3472	0.5576147	0.121283	4.58e-07	2.23e-05	424	232	280	312	387	391	327	587	233.8408	244.3454	287.7122	309.4042	340.4946	345.1705	391.5189	543.2768	Up Regulated
ENSG00000111596	ENSG00000111596.12	CNOT2	70243002	70354993	1	mRNA	CCR4-NOT transcription complex subunit 2 [Source:HGNC Symbol;Acc:HGNC:7878]	2354.202	0.2057497	0.06076272	0.0003669784	0.003452554	4130	2255	2131	2617	2784	2858	2107	3750	2277.741	2374.995	2189.696	2595.227	2449.45	2523.011	2522.723	3470.678	Up Regulated
ENSG00000258168	ENSG00000258168.5		70468080	70543040	1	lncRNA	novel transcript, antisense to PTPRB	1248.826	0.3642	0.071693	8.49e-08	6.07e-06	2083	1079	1159	1327	1677	1518	1187	2156	1148.798	1136.417	1190.923	1315.959	1475.477	1340.074	1421.202	1995.408	Up Regulated
ENSG00000127329	ENSG00000127329.15	PTPRB	70515870	70637440	-1	mRNA	protein tyrosine phosphatase receptor type B [Source:HGNC Symbol;Acc:HGNC:9665]	1535.513	0.3988099	0.1023388	1.771186e-05	0.0003646926	2500	1204	1463	1461	2048	1840	1452	2579	1378.778	1268.068	1503.296	1448.845	1801.894	1624.332	1738.488	2386.901	Up Regulated
ENSG00000258044	ENSG00000258044.1		79823778	79825496	1	lncRNA	novel transcript, antisense to PPP1R12A	89.38068	0.657094	0.158006	2.78e-06	8.85e-05	132	71	89	72	155	140	68	175	72.79948	74.77812	91.45139	71.40096	136.3738	123.5905	81.41677	161.965	Up Regulated
ENSG00000058272	ENSG00000058272.19	PPP1R12A	79773563	79935460	-1	mRNA	protein phosphatase 1 regulatory subunit 12A [Source:HGNC Symbol;Acc:HGNC:7618]	3322.726	0.2497647	0.07157967	0.0001926768	0.00216463	5481	3019	3241	3417	3776	3998	2838	5714	3022.833	3179.65	3330.269	3388.571	3322.242	3529.39	3397.953	5288.388	Up Regulated
ENSG00000257467	ENSG00000257467.5	PPFIA2-AS1	81270669	81312422	1	lncRNA	PPFIA2 antisense RNA 1 [Source:HGNC Symbol;Acc:HGNC:53397]	30.32076	1.108927	0.4150023	0.000304052	0.003014106	15	7	13	64	64	51	37	91	8.272668	7.37249	13.35807	63.46752	56.30919	45.02224	44.3003	84.22178	Up Regulated
ENSG00000139220	ENSG00000139220.16	PPFIA2	81257975	81759553	-1	mRNA	PTPRF interacting protein alpha 2 [Source:HGNC Symbol;Acc:HGNC:9246]	298.6735	1.066306	0.3721673	0.000184347	0.002097735	155	152	141	722	653	638	563	913	85.48424	160.0884	144.8837	715.993	574.5297	563.2194	674.083	844.9944	Up Regulated
ENSG00000258162	ENSG00000258162.3		81378042	81556637	1	lncRNA	novel transcript, antisense to PPFIA2	35.5777	1.147864	0.4086796	0.000200134	0.002229877	15	19	22	76	81	78	70	105	8.272668	20.01105	22.60596	75.36768	71.26632	68.85754	83.81138	97.17898	Up Regulated
ENSG00000139220	ENSG00000139220.16	PPFIA2	81257975	81759553	-1	mRNA	PTPRF interacting protein alpha 2 [Source:HGNC Symbol;Acc:HGNC:9246]	298.6735	1.066306	0.3721673	0.000184347	0.002097735	155	152	141	722	653	638	563	913	85.48424	160.0884	144.8837	715.993	574.5297	563.2194	674.083	844.9944	Up Regulated
ENSG00000258337	ENSG00000258337.1		116174502	116181295	-1	lncRNA	novel transcript, sense intronic to MED13L	62.83429	0.9210745	0.2633246	2.17e-05	0.00042287	31	28	31	38	58	42	46	98	17.09685	29.48996	31.85385	37.68384	51.0302	37.07714	55.07605	90.70038	Up Regulated
ENSG00000123066	ENSG00000123066.8	MED13L	115957905	116277693	-1	mRNA	mediator complex subunit 13L [Source:HGNC Symbol;Acc:HGNC:22962]	10766.63	0.3325341	0.05871917	3.944694e-09	6.733161e-07	13892	8972	9259	10641	13222	12472	9747	13863	7661.594	9449.426	9514.027	10552.47	11633.13	11010.14	11670.14	12830.4	Up Regulated
ENSG00000261485	ENSG00000261485.1	PAN3-AS1	28136843	28138193	-1	lncRNA	PAN3 antisense RNA 1 [Source:HGNC Symbol;Acc:HGNC:39932]	114.5969	0.4045702	0.1847442	0.003967271	0.02030827	142	80	74	78	161	104	78	130	78.31459	84.25703	76.03823	77.35104	141.6528	91.81006	93.38983	120.3168	Up Regulated
ENSG00000152520	ENSG00000152520.14	PAN3	28138506	28295335	1	mRNA	poly(A) specific ribonuclease subunit PAN3 [Source:HGNC Symbol;Acc:HGNC:29991]	2216.569	0.3959214	0.08295432	3.474273e-07	1.809473e-05	2707	1547	1726	1862	2358	2152	1754	3155	1492.941	1629.32	1773.54	1846.508	2074.642	1899.762	2100.074	2919.997	Up Regulated
ENSG00000281026	ENSG00000281026.1	N4BP2L2-IT2	32504506	32509395	-1	lncRNA	N4BPL2 intronic transcript 2 [Source:HGNC Symbol;Acc:HGNC:25038]	715.1727	0.3857678	0.1247604	0.000356682	0.003377584	973	469	605	653	913	688	579	1083	536.6204	493.9568	621.6639	647.5671	803.2858	607.3588	693.2399	1002.332	Up Regulated
ENSG00000244754	ENSG00000244754.8	N4BP2L2	32432417	32538885	-1	mRNA	NEDD4 binding protein 2 like 2 [Source:HGNC Symbol;Acc:HGNC:26916]	5421.657	0.3343518	0.0722116	9.412757e-07	3.842859e-05	8782	4408	4875	5231	6566	6181	4692	8922	4843.371	4642.562	5009.275	5187.478	5776.971	5456.519	5617.757	8257.437	Up Regulated
ENSG00000276672	ENSG00000276672.1		33846190	33850825	1	lncRNA	novel transcript, sense intronic to RFC3	282.0087	-0.3602425	0.1460137	0.002567122	0.0147381	596	211	364	171	234	198	147	278	328.7007	222.2279	374.0259	169.5773	205.8805	174.7922	176.0039	257.2929	Down Regulated
ENSG00000133119	ENSG00000133119.13	RFC3	33818069	33966558	1	mRNA	replication factor C subunit 3 [Source:HGNC Symbol;Acc:HGNC:9971]	728.5067	-0.509326	0.1208674	3.135697e-06	9.709189e-05	2253	841	1085	625	695	702	458	928	1242.555	885.752	1114.885	619.8	611.4826	619.7179	548.3659	858.8771	Down Regulated
ENSG00000280060	ENSG00000280060.1		43894725	43895182	-1	lncRNA	TEC	24.56008	0.6346655	0.2781443	0.001536279	0.01007325	44	24	16	14	32	37	38	40	24.26649	25.27711	16.4407	13.88352	28.15459	32.66319	45.49761	37.02056	Up Regulated
ENSG00000179630	ENSG00000179630.11	LACC1	43879284	43893932	1	mRNA	laccase domain containing 1 [Source:HGNC Symbol;Acc:HGNC:26789]	4043.988	0.6861316	0.1489766	3.429643e-07	1.795436e-05	5168	2409	2143	3692	3863	4871	3902	6904	2850.21	2537.19	2202.026	3661.283	3398.787	4300.065	4671.886	6389.749	Up Regulated
ENSG00000170919	ENSG00000170919.15	TPT1-AS1	45341345	45417975	1	lncRNA	TPT1 antisense RNA 1 [Source:HGNC Symbol;Acc:HGNC:43686]	179.4985	0.3033634	0.1329688	0.005214905	0.02476623	204	103	110	128	165	174	134	147	112.5083	108.4809	113.0298	126.935	145.1721	153.6053	160.4389	136.0506	Up Regulated
ENSG00000133112	ENSG00000133112.16	TPT1	45333471	45341284	-1	mRNA	tumor protein, translationally-controlled 1 [Source:HGNC Symbol;Acc:HGNC:12022]	13852.33	0.3842088	0.08885547	3.049088e-06	9.48439e-05	24283	14792	14191	17388	19635	24346	14234	26933	13392.35	15579.13	14581.87	17243.33	17275.48	21492.38	17042.45	24926.87	Up Regulated
ENSG00000229152	ENSG00000229152.2	ANKRD10-IT1	110894639	110899172	-1	lncRNA	ANKRD10 intronic transcript 1 [Source:HGNC Symbol;Acc:HGNC:39891]	806.9445	0.3293974	0.1098943	0.000647529	0.005274652	1341	779	861	933	991	949	844	1760	739.5765	820.4528	884.7151	925.2375	871.9126	837.7668	1010.526	1628.905	Up Regulated
ENSG00000088448	ENSG00000088448.14	ANKRD10	110878540	110915069	-1	mRNA	ankyrin repeat domain 10 [Source:HGNC Symbol;Acc:HGNC:20265]	6013.206	0.186227	0.05791909	0.0007514678	0.005869612	11133	5829	6102	6997	7262	7566	5999	9674	6139.974	6139.178	6270.071	6938.785	6389.333	6679.182	7182.636	8953.423	Up Regulated
ENSG00000258441	ENSG00000258441.1	LINC00641	21200079	21206900	-1	lncRNA	long intergenic non-protein coding RNA 641 [Source:HGNC Symbol;Acc:HGNC:27511]	1137.749	0.4294588	0.1365963	0.000245355	0.002592666	1102	827	745	1038	1210	1099	865	1625	607.7653	871.0071	765.52	1029.364	1064.596	970.1851	1035.669	1503.96	Up Regulated
ENSG00000092199	ENSG00000092199.17	HNRNPC	21209136	21269494	-1	mRNA	heterogeneous nuclear ribonucleoprotein C [Source:HGNC Symbol;Acc:HGNC:5035]	9567.904	0.1557125	0.05641248	0.003880291	0.01997377	17064	9755	9364	10229	11283	12216	8739	14086	9410.987	10274.09	9621.919	10143.9	9927.134	10784.15	10463.25	13036.79	Up Regulated
ENSG00000270062	ENSG00000270062.1		50723777	50724272	-1	lncRNA	novel transcript, sense intronic to NIN	36.98626	0.3995699	0.2295898	0.009855346	0.039313	84	32	32	32	50	46	40	91	46.32694	33.70281	32.8814	31.73376	43.99155	40.60829	47.89222	84.22178	Up Regulated
ENSG00000100503	ENSG00000100503.23	NIN	50719763	50831162	-1	mRNA	ninein [Source:HGNC Symbol;Acc:HGNC:14906]	6231.384	0.1571288	0.05697196	0.003875497	0.01995428	10329	5604	6178	6074	6849	7383	5546	8330	5696.559	5902.205	6348.165	6023.465	6025.963	6517.631	6640.256	7709.532	Up Regulated
ENSG00000285774	ENSG00000285774.1	SAMD4A-AS1	54684026	54729324	-1	lncRNA	SAMD4A antisense RNA 1 [Source:HGNC Symbol;Acc:HGNC:54803]	40.53075	0.5922494	0.2929452	0.002730337	0.01541565	23	21	25	34	36	38	38	50	12.68476	22.11747	25.68859	33.71712	31.67392	33.54598	45.49761	46.27571	Up Regulated
ENSG00000020577	ENSG00000020577.13	SAMD4A	54566117	54793315	1	mRNA	sterile alpha motif domain containing 4A [Source:HGNC Symbol;Acc:HGNC:23023]	1329.075	0.5525497	0.172215	0.0001294263	0.001612826	1004	1172	1002	1859	2049	2088	1533	1854	553.7173	1234.366	1029.599	1843.533	1802.774	1843.263	1835.469	1715.903	Up Regulated
ENSG00000284930	ENSG00000284930.1		73458850	73466167	-1	lncRNA	novel transcript	71.89278	0.7265402	0.2384794	0.000143096	0.001738371	43	57	38	73	90	104	72	91	23.71498	60.03314	39.04666	72.39264	79.18479	91.81006	86.206	84.22178	Up Regulated
ENSG00000133961	ENSG00000133961.20	NUMB	73275107	73458617	-1	mRNA	NUMB endocytic adaptor protein [Source:HGNC Symbol;Acc:HGNC:8060]	3121.955	0.3152394	0.1147515	0.001505978	0.009907078	2605	2127	2035	2697	2799	3035	2379	3059	1436.687	2240.184	2091.051	2674.561	2462.647	2679.265	2848.39	2831.148	Up Regulated
ENSG00000258875	ENSG00000258875.5		91242759	91252211	1	lncRNA	novel transcript, antisense to GPR68	82.94873	0.6304974	0.2152222	0.000252206	0.002647445	70	51	38	124	123	127	92	94	38.60578	53.71386	39.04666	122.9683	108.2192	112.1142	110.1521	86.99833	Up Regulated
ENSG00000119714	ENSG00000119714.11	GPR68	91232532	91253925	-1	mRNA	G protein-coupled receptor 68 [Source:HGNC Symbol;Acc:HGNC:4519]	531.1238	0.5630042	0.1994968	0.0004184412	0.003785915	356	265	201	485	544	620	516	209	196.338	279.1014	206.5363	480.9648	478.6281	547.3292	617.8096	193.4324	Up Regulated
ENSG00000276182	ENSG00000276182.1	AL163051.2	96537170	96537904	1	lncRNA	novel transcript	112.7045	0.294055	0.1454746	0.01094826	0.042318	194	107	97	86	149	129	98	173	106.9932	112.6938	99.67174	85.28448	131.0948	113.8798	117.3359	160.1139	Up Regulated
ENSG00000090060	ENSG00000090060.17	PAPOLA	96501433	96567116	1	mRNA	poly(A) polymerase alpha [Source:HGNC Symbol;Acc:HGNC:14981]	5797.433	0.1993122	0.06872619	0.001966735	0.01217168	10609	5099	5566	5954	6600	6883	5115	9189	5850.982	5370.333	5719.308	5904.463	5806.885	6076.237	6124.218	8504.549	Up Regulated
ENSG00000260285	ENSG00000260285.1	TRMT61A-DT	103525010	103529072	-1	lncRNA	TRMT61A divergent transcript [Source:HGNC Symbol;Acc:HGNC:56082]	87.75474	-0.4767837	0.1931588	0.001454948	0.009657812	133	82	94	84	75	66	69	23	73.35099	86.36346	96.5891	83.30112	65.98733	58.26407	82.61408	21.28682	Down Regulated
ENSG00000166166	ENSG00000166166.13	TRMT61A	103529196	103537073	1	mRNA	tRNA methyltransferase 61A [Source:HGNC Symbol;Acc:HGNC:23790]	341.1527	-0.7613764	0.279345	0.0003728408	0.003491537	829	406	314	342	294	310	231	14	457.2028	427.6044	322.6487	339.1546	258.6703	273.6646	276.5776	12.9572	Down Regulated
ENSG00000260285	ENSG00000260285.1	TRMT61A-DT	103525010	103529072	-1	lncRNA	TRMT61A divergent transcript [Source:HGNC Symbol;Acc:HGNC:56082]	87.75474	-0.4767837	0.1931588	0.001454948	0.009657812	133	82	94	84	75	66	69	23	73.35099	86.36346	96.5891	83.30112	65.98733	58.26407	82.61408	21.28682	Down Regulated
ENSG00000166165	ENSG00000166165.13	CKB	103519667	103522833	-1	mRNA	creatine kinase B [Source:HGNC Symbol;Acc:HGNC:1991]	196.9652	-0.6697528	0.428593	0.005300314	0.02505469	306	117	107	97	98	112	46	14	168.7624	123.2259	109.9472	96.19296	86.22344	98.87237	55.07605	12.9572	Down Regulated
ENSG00000224078	ENSG00000224078.14	SNHG14	24978583	25420336	1	lncRNA	small nucleolar RNA host gene 14 [Source:HGNC Symbol;Acc:HGNC:37462]	4264.127	0.3175866	0.08926027	0.00010008	0.001330378	5745	2719	3134	3412	4342	3742	3021	5729	3168.432	2863.686	3220.322	3383.612	3820.226	3303.396	3617.06	5302.27	Up Regulated
ENSG00000114062	ENSG00000114062.19	UBE3A	25333728	25439051	-1	mRNA	ubiquitin protein ligase E3A [Source:HGNC Symbol;Acc:HGNC:12496]	3191.348	0.2421038	0.0662802	0.0001092922	0.001423953	5962	2964	2891	3244	3697	3965	2826	5313	3288.11	3121.723	2970.629	3217.01	3252.735	3500.258	3383.585	4917.256	Up Regulated
ENSG00000224078	ENSG00000224078.14	SNHG14	24978583	25420336	1	lncRNA	small nucleolar RNA host gene 14 [Source:HGNC Symbol;Acc:HGNC:37462]	4264.127	0.3175866	0.08926027	0.00010008	0.001330378	5745	2719	3134	3412	4342	3742	3021	5729	3168.432	2863.686	3220.322	3383.612	3820.226	3303.396	3617.06	5302.27	Up Regulated
ENSG00000207279	ENSG00000207279.1	SNORD116-24	25094037	25094128	1	mRNA	small nucleolar RNA, C/D box 116-24 [Source:HGNC Symbol;Acc:HGNC:33090]	23.2408	0.7112115	0.3979052	0.003626169	0.01909143	34	15	10	13	23	60	12	30	18.75138	15.79819	10.27544	12.89184	20.23611	52.96734	14.36767	27.76542	Up Regulated
ENSG00000224078	ENSG00000224078.14	SNHG14	24978583	25420336	1	lncRNA	small nucleolar RNA host gene 14 [Source:HGNC Symbol;Acc:HGNC:37462]	4264.127	0.3175866	0.08926027	0.00010008	0.001330378	5745	2719	3134	3412	4342	3742	3021	5729	3168.432	2863.686	3220.322	3383.612	3820.226	3303.396	3617.06	5302.27	Up Regulated
ENSG00000206621	ENSG00000206621.1	SNORD116-14	25080142	25080233	1	mRNA	small nucleolar RNA, C/D box 116-14 [Source:HGNC Symbol;Acc:HGNC:33080]	20.70348	0.498459	0.3330374	0.009066779	0.0369575	36	14	17	10	30	37	24	21	19.8544	14.74498	17.46824	9.9168	26.39493	32.66319	28.73533	19.4358	Up Regulated
ENSG00000261529	ENSG00000261529.1		25345633	25347235	-1	lncRNA	novel transcript, sense intronic to UBE3A	48.0492	0.4233523	0.2319209	0.006758093	0.02984139	31	25	33	41	34	42	33	68	17.09685	26.33032	33.90894	40.65888	29.91426	37.07714	39.51108	62.93496	Up Regulated
ENSG00000114062	ENSG00000114062.19	UBE3A	25333728	25439051	-1	mRNA	ubiquitin protein ligase E3A [Source:HGNC Symbol;Acc:HGNC:12496]	3191.348	0.2421038	0.0662802	0.0001092922	0.001423953	5962	2964	2891	3244	3697	3965	2826	5313	3288.11	3121.723	2970.629	3217.01	3252.735	3500.258	3383.585	4917.256	Up Regulated
ENSG00000279537	ENSG00000279537.1		40244925	40247366	1	lncRNA	TEC	48.45087	-0.9432652	0.2347375	3.49e-06	0.000104447	138	69	94	45	42	41	41	22	76.10855	72.67169	96.5891	44.6256	36.9529	36.19435	49.08952	20.36131	Down Regulated
ENSG00000137843	ENSG00000137843.11	PAK6	40217428	40277487	1	mRNA	p21 (RAC1) activated kinase 6 [Source:HGNC Symbol;Acc:HGNC:16061]	41.65288	-0.5621726	0.2486983	0.001849385	0.01161015	82	44	68	50	50	36	35	12	45.22392	46.34137	69.87297	49.584	43.99155	31.7804	41.90569	11.10617	Down Regulated
ENSG00000259488	ENSG00000259488.2	DUT-AS1	48312353	48331856	-1	lncRNA	DUT antisense RNA 1 [Source:HGNC Symbol;Acc:HGNC:55420]	77.51645	-0.5842539	0.1763601	9.16e-05	0.001245048	159	59	75	60	52	55	32	54	87.69028	62.13956	77.06577	59.5008	45.75121	48.5534	38.31378	49.97776	Down Regulated
ENSG00000128951	ENSG00000128951.14	DUT	48331011	48343373	1	mRNA	deoxyuridine triphosphatase [Source:HGNC Symbol;Acc:HGNC:3078]	754.4964	-0.2463915	0.1058838	0.007398778	0.03186008	2098	843	1040	745	716	821	626	1144	1157.071	887.8585	1068.645	738.8016	629.959	724.7698	749.5132	1058.788	Down Regulated
ENSG00000259188	ENSG00000259188.5		49877299	49883525	1	lncRNA	novel transcript, antisense to ATP8B4	324.2215	0.5157142	0.1337217	1.28e-05	0.000281479	184	118	150	153	236	168	168	238	101.4781	124.2791	154.1315	151.727	207.6401	148.3086	201.1473	220.2724	Up Regulated
ENSG00000104043	ENSG00000104043.14	ATP8B4	49858238	50182817	-1	mRNA	ATPase phospholipid transporting 8B4 (putative) [Source:HGNC Symbol;Acc:HGNC:13536]	8233.001	0.4452008	0.08153779	7.643466e-09	1.101093e-06	8235	5330	5693	6490	9054	7426	5941	10073	4541.695	5613.625	5849.806	6436.003	7965.99	6555.591	7113.192	9322.704	Up Regulated
ENSG00000259712	ENSG00000259712.1		52056675	52100523	-1	lncRNA	novel transcript, antisense to MAPK6	140.7384	0.4710872	0.1598403	0.000419032	0.003787046	136	69	68	130	145	117	107	154	75.00552	72.67169	69.87297	128.9184	127.5755	103.2863	128.1117	142.5292	Up Regulated
ENSG00000069956	ENSG00000069956.12	MAPK6	51952106	52067375	1	mRNA	mitogen-activated protein kinase 6 [Source:HGNC Symbol;Acc:HGNC:6879]	5426.642	0.4060052	0.07923921	5.581252e-08	4.6272e-06	8381	4797	4450	5703	6256	6909	5124	9708	4622.215	5052.262	4572.569	5655.551	5504.223	6099.189	6134.993	8984.891	Up Regulated
ENSG00000259935	ENSG00000259935.1		52648634	52649866	-1	lncRNA	novel transcript, intronic to KIAA1370	66.61402	0.5758509	0.244923	0.001395429	0.009354438	69	68	85	46	107	83	74	147	38.05427	71.61848	87.34121	45.61728	94.14192	73.27149	88.60061	136.0506	Up Regulated
ENSG00000047346	ENSG00000047346.12	ATOSA	52581317	52709817	-1	mRNA	atos homolog A [Source:HGNC Symbol;Acc:HGNC:25609]	1078.433	0.3431611	0.1109938	0.0004449668	0.003963669	1703	761	1039	913	1208	1182	968	1710	939.2236	801.495	1067.618	905.4039	1062.836	1043.457	1158.992	1582.629	Up Regulated
ENSG00000279145	ENSG00000279145.2		55171378	55176739	-1	lncRNA	TEC	118.7493	0.3485348	0.1490111	0.003653233	0.01915943	102	71	87	98	122	109	78	127	56.25414	74.77812	89.3963	97.18464	107.3394	96.224	93.38983	117.5403	Up Regulated
ENSG00000137876	ENSG00000137876.10	RSL24D1	55180806	55197049	-1	mRNA	ribosomal L24 domain containing 1 [Source:HGNC Symbol;Acc:HGNC:18479]	2049.46	0.3115121	0.08284911	4.762582e-05	0.0007623133	3909	2323	2036	2777	2929	3247	2102	4260	2155.857	2446.614	2092.079	2753.895	2577.025	2866.416	2516.736	3942.69	Up Regulated
ENSG00000274765	ENSG00000274765.1		55343141	55343575	-1	lncRNA	novel transcript, sense intronic to CCPG1	39.10176	0.6063209	0.2092247	0.000321063	0.003138318	51	26	25	26	56	37	28	64	28.12707	27.38354	25.68859	25.78368	49.27054	32.66319	33.52455	59.2329	Up Regulated
ENSG00000260916	ENSG00000260916.7	CCPG1	55340032	55408510	-1	mRNA	cell cycle progression 1 [Source:HGNC Symbol;Acc:HGNC:24227]	1143.354	0.2391505	0.08110093	0.001314234	0.008933975	1843	980	1032	1186	1336	1290	952	1811	1016.435	1032.149	1060.425	1176.133	1175.454	1138.798	1139.835	1676.106	Up Regulated
ENSG00000274765	ENSG00000274765.1		55343141	55343575	-1	lncRNA	novel transcript, sense intronic to CCPG1	39.10176	0.6063209	0.2092247	0.000321063	0.003138318	51	26	25	26	56	37	28	64	28.12707	27.38354	25.68859	25.78368	49.27054	32.66319	33.52455	59.2329	Up Regulated
ENSG00000069943	ENSG00000069943.10	PIGB	55318960	55355648	1	mRNA	phosphatidylinositol glycan anchor biosynthesis class B [Source:HGNC Symbol;Acc:HGNC:8959]	619.926	0.2484185	0.0892117	0.00206126	0.01261094	1001	472	555	557	701	631	492	936	552.0627	497.1165	570.2867	552.3658	616.7616	557.0399	589.0743	866.2812	Up Regulated
ENSG00000259248	ENSG00000259248.6	USP3-AS1	63544247	63601589	-1	lncRNA	USP3 antisense RNA 1 [Source:HGNC Symbol;Acc:HGNC:44140]	183.9482	0.5676666	0.1497543	1.46e-05	0.000311119	213	152	181	182	252	212	192	373	117.4719	160.0884	185.9854	180.4858	221.7174	187.1513	229.8827	345.2168	Up Regulated
ENSG00000140455	ENSG00000140455.17	USP3	63504511	63594640	1	mRNA	ubiquitin specific peptidase 3 [Source:HGNC Symbol;Acc:HGNC:12626]	1633.766	0.4384877	0.06939633	4.328892e-11	2.313907e-08	2184	1467	1344	1823	2166	2186	1624	2508	1204.5	1545.063	1381.019	1807.833	1905.714	1929.777	1944.424	2321.189	Up Regulated
ENSG00000259202	ENSG00000259202.1		67142734	67146939	-1	lncRNA	novel transcript, antisense to SMAD3	25.70387	0.448587	0.436784	0.0136338	0.04970917	8	6	13	14	26	11	21	9	4.41209	6.319277	13.35807	13.88352	22.87561	9.710679	25.14342	8.329627	Up Regulated
ENSG00000166949	ENSG00000166949.16	SMAD3	67063763	67195173	1	mRNA	SMAD family member 3 [Source:HGNC Symbol;Acc:HGNC:6769]	1364.979	0.3799768	0.1097688	0.0001014952	0.001343918	1168	947	982	1336	1688	1539	1158	1151	644.1651	997.3926	1009.048	1324.885	1485.155	1358.612	1386.48	1065.267	Up Regulated
ENSG00000259426	ENSG00000259426.5	KIF23-AS1	69396904	69415029	-1	lncRNA	KIF23 and PAQR5 antisense RNA 1 [Source:HGNC Symbol;Acc:HGNC:27075]	30.56003	0.704999	0.3050614	0.001221412	0.008435673	21	8	11	30	32	38	25	21	11.58174	8.425703	11.30298	29.7504	28.15459	33.54598	29.93264	19.4358	Up Regulated
ENSG00000137819	ENSG00000137819.13	PAQR5	69298912	69407780	1	mRNA	progestin and adipoQ receptor family member 5 [Source:HGNC Symbol;Acc:HGNC:29645]	1716.005	0.614902	0.127946	1.482138e-07	9.587638e-06	2032	1272	1075	2291	2244	2675	1825	2880	1120.671	1339.687	1104.609	2271.939	1974.341	2361.461	2185.083	2665.481	Up Regulated
ENSG00000247240	ENSG00000247240.7	UBL7-DT	74461248	74513971	1	lncRNA	UBL7 divergent transcript [Source:HGNC Symbol;Acc:HGNC:48614]	136.869	-0.3166584	0.1392183	0.005328781	0.02516582	294	146	184	158	181	134	92	126	162.1443	153.7691	189.068	156.6854	159.2494	118.2937	110.1521	116.6148	Down Regulated
ENSG00000138629	ENSG00000138629.16	UBL7	74445977	74461182	-1	mRNA	ubiquitin like 7 [Source:HGNC Symbol;Acc:HGNC:28221]	635.1217	-0.2723902	0.1185993	0.006659186	0.02950728	1048	558	614	600	681	595	446	273	577.9837	587.6928	630.9118	595.008	599.1649	525.2595	533.9982	252.6653	Down Regulated
ENSG00000246877	ENSG00000246877.1	DNM1P35	75727670	75738629	-1	lncRNA	dynamin 1 pseudogene 35 [Source:HGNC Symbol;Acc:HGNC:35182]	75.9934	-0.3715863	0.1760746	0.005639801	0.02618557	164	70	100	70	65	91	62	36	90.44784	73.7249	102.7544	69.4176	57.18902	80.3338	74.23294	33.31851	Down Regulated
ENSG00000182950	ENSG00000182950.3	ODF3L1	75724041	75727688	1	mRNA	outer dense fiber of sperm tails 3 like 1 [Source:HGNC Symbol;Acc:HGNC:28735]	60.88675	-1.246081	0.2436512	2.237478e-08	2.379458e-06	233	79	99	69	50	51	50	8	128.5021	83.20382	101.7268	68.42592	43.99155	45.02224	59.86527	7.404113	Down Regulated
ENSG00000278600	ENSG00000278600.1		79920195	79922455	-1	lncRNA	novel transcript, sense intronic to ST20	398.5736	0.4128295	0.1059069	1.61e-05	0.000339226	558	418	368	462	545	547	444	706	307.7433	440.243	378.1361	458.1562	479.5079	482.8856	531.6036	653.413	Up Regulated
ENSG00000180953	ENSG00000180953.11	ST20	79898840	79923702	-1	mRNA	suppressor of tumorigenicity 20 [Source:HGNC Symbol;Acc:HGNC:33520]	237.1715	0.3377985	0.1091883	0.0003467973	0.003311776	304	199	171	227	241	257	206	349	167.6594	209.5894	175.71	225.1114	212.0393	226.8768	246.6449	323.0044	Up Regulated
ENSG00000272888	ENSG00000272888.6	CHASERR	92819540	92899701	1	lncRNA	CHD2 adjacent suppressive regulatory RNA [Source:HGNC Symbol;Acc:HGNC:48626]	2733.714	0.2961632	0.109728	0.001953135	0.01211361	5624	2289	2768	3002	3295	3648	2700	5376	3101.699	2410.804	2844.241	2977.023	2899.043	3220.414	3232.725	4975.564	Up Regulated
ENSG00000173575	ENSG00000173575.21	CHD2	92886203	93027996	1	mRNA	chromodomain helicase DNA binding protein 2 [Source:HGNC Symbol;Acc:HGNC:1917]	6291.513	0.205117	0.05412776	7.942993e-05	0.001131882	9926	4828	5536	5690	6882	6836	5321	7496	5474.3	5084.912	5688.482	5642.659	6054.997	6034.746	6370.862	6937.654	Up Regulated
ENSG00000259590	ENSG00000259590.1	LINC02244	99395179	99396593	-1	lncRNA	long intergenic non-protein coding RNA 2244 [Source:HGNC Symbol;Acc:HGNC:53929]	43.52093	0.8637027	0.2512255	3.47e-05	0.000599548	29	27	17	24	45	43	34	50	15.99382	28.43675	17.46824	23.80032	39.5924	37.95993	40.70839	46.27571	Up Regulated
ENSG00000168904	ENSG00000168904.15	LRRC28	99251362	99390729	1	mRNA	leucine rich repeat containing 28 [Source:HGNC Symbol;Acc:HGNC:28355]	556.9542	0.2472131	0.07476136	0.0003694295	0.003467584	650	424	423	456	523	524	442	615	358.4823	446.5623	434.651	452.2061	460.1516	462.5814	529.209	569.1912	Up Regulated
ENSG00000278987	ENSG00000278987.1		1688355	1690536	1	lncRNA	TEC	34.28522	-0.4399172	0.2465872	0.007871526	0.03340784	56	26	32	34	22	24	12	28	30.88463	27.38354	32.8814	33.71712	19.35628	21.18694	14.36767	25.91439	Down Regulated
ENSG00000206053	ENSG00000206053.13	JPT2	1678256	1702280	1	mRNA	Jupiter microtubule associated homolog 2 [Source:HGNC Symbol;Acc:HGNC:14137]	1539.451	-0.3745197	0.07581465	1.68333e-07	1.058569e-05	3155	1572	1630	1271	1337	1391	990	1330	1740.018	1655.651	1674.896	1260.425	1176.334	1227.959	1185.332	1230.934	Down Regulated
ENSG00000260260	ENSG00000260260.1	SNHG19	2154792	2155405	-1	lncRNA	small nucleolar RNA host gene 19 [Source:HGNC Symbol;Acc:HGNC:49574]	56.36173	-0.4717472	0.2378774	0.004676827	0.02285749	110	51	37	48	49	40	36	12	60.66623	53.71386	38.01912	47.60064	43.11172	35.31156	43.103	11.10617	Down Regulated
ENSG00000131653	ENSG00000131653.13	TRAF7	2155698	2178129	1	mRNA	TNF receptor associated factor 7 [Source:HGNC Symbol;Acc:HGNC:20456]	1561.969	-0.385281	0.2256276	0.01110805	0.04269999	2488	1496	1383	1361	1404	1491	1049	143	1372.16	1575.606	1421.093	1349.677	1235.283	1316.238	1255.973	132.3485	Down Regulated
ENSG00000260260	ENSG00000260260.1	SNHG19	2154792	2155405	-1	lncRNA	small nucleolar RNA host gene 19 [Source:HGNC Symbol;Acc:HGNC:49574]	56.36173	-0.4717472	0.2378774	0.004676827	0.02285749	110	51	37	48	49	40	36	12	60.66623	53.71386	38.01912	47.60064	43.11172	35.31156	43.103	11.10617	Down Regulated
ENSG00000167964	ENSG00000167964.12	RAB26	2140803	2154165	1	mRNA	RAB26, member RAS oncogene family [Source:HGNC Symbol;Acc:HGNC:14259]	67.76995	-0.7931076	0.3290471	0.0008508549	0.006446313	177	38	71	69	60	46	31	12	97.61748	40.02209	72.9556	68.42592	52.78986	40.60829	37.11647	11.10617	Down Regulated
ENSG00000259895	ENSG00000259895.1	TEDC2-AS1	2464950	2468213	-1	lncRNA	TEDC2 antisense RNA 1 [Source:HGNC Symbol;Acc:HGNC:55403]	35.33795	-0.7675755	0.2964562	0.000613866	0.00505016	60	23	25	23	21	17	15	6	33.09067	24.2239	25.68859	22.80864	18.47645	15.00741	17.95958	5.553085	Down Regulated
ENSG00000162068	ENSG00000162068.1	NTN3	2471297	2474145	1	mRNA	netrin 3 [Source:HGNC Symbol;Acc:HGNC:8030]	28.48175	-0.663392	0.3264555	0.002680482	0.01521262	60	21	18	21	24	19	9	4	33.09067	22.11747	18.49579	20.82528	21.11595	16.77299	10.77575	3.702056	Down Regulated
ENSG00000259895	ENSG00000259895.1	TEDC2-AS1	2464950	2468213	-1	lncRNA	TEDC2 antisense RNA 1 [Source:HGNC Symbol;Acc:HGNC:55403]	35.33795	-0.7675755	0.2964562	0.000613866	0.00505016	60	23	25	23	21	17	15	6	33.09067	24.2239	25.68859	22.80864	18.47645	15.00741	17.95958	5.553085	Down Regulated
ENSG00000162062	ENSG00000162062.15	TEDC2	2460086	2464963	1	mRNA	tubulin epsilon and delta complex 2 [Source:HGNC Symbol;Acc:HGNC:25849]	136.0256	-1.030905	0.2171851	1.269354e-07	8.45348e-06	308	140	157	115	120	102	58	10	169.8655	147.4498	161.3244	114.0432	105.5797	90.04448	69.44372	9.255141	Down Regulated
ENSG00000262703	ENSG00000262703.1		11348143	11349321	-1	lncRNA	novel transcript, antisense to RMI2	18.42067	-0.7238683	0.2784173	0.000622706	0.005110469	48	24	32	20	15	13	18	13	26.47254	25.27711	32.8814	19.8336	13.19747	11.47626	21.5515	12.03168	Down Regulated
ENSG00000175643	ENSG00000175643.10	RMI2	11249619	11381662	1	mRNA	RecQ mediated genome instability 2 [Source:HGNC Symbol;Acc:HGNC:28349]	159.668	-0.3084788	0.1309584	0.004203669	0.02115583	285	168	189	117	130	153	93	145	157.1807	176.9398	194.2058	116.0266	114.378	135.0667	111.3494	134.1995	Down Regulated
ENSG00000277369	ENSG00000277369.1		11797456	11798275	1	lncRNA	novel transcript	45.532	-0.5906617	0.2265773	0.000750473	0.005867443	150	53	81	51	54	58	41	22	82.72668	55.82028	83.23104	50.57568	47.51088	51.20176	49.08952	20.36131	Down Regulated
ENSG00000122299	ENSG00000122299.12	ZC3H7A	11750586	11797258	-1	mRNA	zinc finger CCCH-type containing 7A [Source:HGNC Symbol;Acc:HGNC:30959]	1065.896	0.2903662	0.07445691	3.07071e-05	0.0005476055	1649	813	944	957	1232	1197	886	1470	909.442	856.2621	970.0012	949.0378	1083.952	1056.698	1060.813	1360.506	Up Regulated
ENSG00000276564	ENSG00000276564.1		14150833	14153235	1	lncRNA	novel transcript	50.70574	0.6353977	0.2548264	0.000748202	0.005854191	69	25	25	41	70	47	40	84	38.05427	26.33032	25.68859	40.65888	61.58817	41.49108	47.89222	77.74318	Up Regulated
ENSG00000186260	ENSG00000186260.16	MRTFB	14071319	14266773	1	mRNA	myocardin related transcription factor B [Source:HGNC Symbol;Acc:HGNC:29819]	1079.978	0.3637086	0.08954054	1.183386e-05	0.0002656014	1396	609	696	746	932	959	874	1133	769.9096	641.4067	715.1704	739.7933	820.0025	846.5947	1046.445	1048.607	Up Regulated
ENSG00000275807	ENSG00000275807.1		28822431	28823969	-1	lncRNA	novel transcript, antisense to ATXN2L	27.40267	-0.6068621	0.2783512	0.002185996	0.01316003	72	28	23	28	33	23	11	9	39.70881	29.48996	23.6335	27.76704	29.03442	20.30415	13.17036	8.329627	Down Regulated
ENSG00000168488	ENSG00000168488.18	ATXN2L	28822999	28837237	1	mRNA	ataxin 2 like [Source:HGNC Symbol;Acc:HGNC:31326]	1613.947	-0.2974306	0.1421698	0.009113321	0.03709615	2322	988	1152	1056	1275	1085	877	431	1280.609	1040.574	1183.73	1047.214	1121.785	957.8261	1050.037	398.8966	Down Regulated
ENSG00000260853	ENSG00000260853.2	NFATC2IP-AS1	28952816	28966883	-1	lncRNA	NFATC2IP antisense RNA 1 [Source:HGNC Symbol;Acc:HGNC:56085]	155.5467	-0.3095784	0.121035	0.002720188	0.0153778	311	140	171	142	146	160	93	123	171.52	147.4498	175.71	140.8186	128.4553	141.2462	111.3494	113.8382	Down Regulated
ENSG00000176953	ENSG00000176953.12	NFATC2IP	28950807	28967092	1	mRNA	nuclear factor of activated T cells 2 interacting protein [Source:HGNC Symbol;Acc:HGNC:25906]	1026.049	-0.3294348	0.08117166	1.085882e-05	0.0002486633	1985	975	1239	926	1064	976	774	701	1094.75	1026.883	1273.127	918.2957	936.1402	861.6021	926.7144	648.7854	Down Regulated
ENSG00000279583	ENSG00000279583.1		29595130	29596137	-1	lncRNA	novel transcript	13.72755	-0.6099545	0.5336526	0.01068805	0.0416291	18	9	13	9	10	5	3	3	9.927202	9.478916	13.35807	8.92512	8.798311	4.413945	3.591916	2.776542	Down Regulated
ENSG00000205534	ENSG00000205534.6	SMG1P2	29527568	29594966	-1	mRNA	SMG1 pseudogene 2 [Source:HGNC Symbol;Acc:HGNC:49859]	75.61316	0.4094933	0.1718577	0.002442053	0.01422512	101	47	54	79	104	68	68	112	55.70263	49.50101	55.48736	78.34272	91.50243	60.02965	81.41677	103.6576	Up Regulated
ENSG00000260719	ENSG00000260719.1		29745247	29748299	1	lncRNA	novel transcript, antisense to C16orf54	70.59177	-0.5917478	0.2145457	0.000501817	0.004323155	207	77	114	74	85	70	57	37	114.1628	81.09739	117.14	73.38432	74.78564	61.79523	68.24641	34.24402	Down Regulated
ENSG00000185905	ENSG00000185905.4	C16orf54	29742463	29745990	-1	mRNA	chromosome 16 open reading frame 54 [Source:HGNC Symbol;Acc:HGNC:26649]	2908.894	-0.8194368	0.1374942	1.87179e-10	7.040704e-08	8395	3463	3693	2762	2722	2763	1865	1185	4629.937	3647.276	3794.719	2739.02	2394.9	2439.146	2232.975	1096.734	Down Regulated
ENSG00000278922	ENSG00000278922.1		30526918	30528294	1	lncRNA	novel transcript	31.91275	-1.010891	0.3214679	8.79e-05	0.001215591	85	39	44	33	16	37	19	5	46.87845	41.0753	45.21192	32.72544	14.0773	32.66319	22.7488	4.627571	Down Regulated
ENSG00000169957	ENSG00000169957.10	ZNF768	30524004	30526821	-1	mRNA	zinc finger protein 768 [Source:HGNC Symbol;Acc:HGNC:26273]	558.5443	-0.5277116	0.1499855	4.740835e-05	0.0007600304	921	510	442	427	407	496	311	119	507.9418	537.1386	454.1743	423.4474	358.0912	437.8633	372.362	110.1362	Down Regulated
ENSG00000260167	ENSG00000260167.1		30585907	30608593	1	lncRNA	novel transcript, antisense to ZNF689	21.09235	-0.5406429	0.3267076	0.00652507	0.02907542	45	23	44	21	23	26	11	10	24.818	24.2239	45.21192	20.82528	20.23611	22.95251	13.17036	9.255141	Down Regulated
ENSG00000156853	ENSG00000156853.12	ZNF689	30602558	30624012	-1	mRNA	zinc finger protein 689 [Source:HGNC Symbol;Acc:HGNC:25173]	368.7641	-0.3719883	0.09005346	7.6606e-06	0.0001904555	831	385	386	378	400	362	295	242	458.3058	405.487	396.6319	374.8551	351.9324	319.5696	353.2051	223.9744	Down Regulated
ENSG00000280067	ENSG00000280067.1		48343755	48346058	-1	lncRNA	novel transcript	132.6519	0.4461827	0.1606623	0.000727545	0.005736756	176	66	111	101	155	159	100	162	97.06597	69.51205	114.0573	100.1597	136.3738	140.3635	119.7305	149.9333	Up Regulated
ENSG00000102910	ENSG00000102910.13	LONP2	48244300	48363122	1	mRNA	lon peptidase 2, peroxisomal [Source:HGNC Symbol;Acc:HGNC:20598]	2742.673	0.1022298	0.03735728	0.005293182	0.02503325	5561	2738	2674	2849	3434	3441	2494	3635	3066.954	2883.697	2747.652	2825.296	3021.34	3037.677	2986.08	3364.244	Up Regulated
ENSG00000279722	ENSG00000279722.1		53487607	53489943	-1	lncRNA	novel transcript	23.90075	0.752103	0.2542648	0.000203386	0.002246429	33	19	19	14	41	21	28	48	18.19987	20.01105	19.52333	13.88352	36.07307	18.53857	33.52455	44.42468	Up Regulated
ENSG00000103479	ENSG00000103479.16	RBL2	53433977	53491648	1	mRNA	RB transcriptional corepressor like 2 [Source:HGNC Symbol;Acc:HGNC:9894]	1931.936	0.3067363	0.06222962	2.462413e-07	1.425258e-05	3116	1868	1782	2167	2584	2462	1920	3029	1718.509	1967.402	1831.083	2148.971	2273.483	2173.427	2298.827	2803.382	Up Regulated
ENSG00000274093	ENSG00000274093.1		69632141	69632571	1	lncRNA	novel transcript, sense intronic to NFAT5	28.70009	0.6682729	0.2696496	0.000771642	0.005989147	28	21	12	22	35	24	19	54	15.44231	22.11747	12.33052	21.81696	30.79409	21.18694	22.7488	49.97776	Up Regulated
ENSG00000102908	ENSG00000102908.21	NFAT5	69565094	69704666	1	mRNA	nuclear factor of activated T cells 5 [Source:HGNC Symbol;Acc:HGNC:7774]	2113.308	0.2961335	0.1136916	0.002545846	0.01465322	2180	1274	1380	1479	1823	1688	1326	2363	1202.294	1341.793	1418.01	1466.695	1603.932	1490.148	1587.627	2186.99	Up Regulated
ENSG00000261061	ENSG00000261061.1		81030770	81031485	1	lncRNA	novel transcript	167.9064	-0.3907937	0.150928	0.001563229	0.01019336	342	224	260	154	198	149	107	188	188.6168	235.9197	267.1614	152.7187	174.2065	131.5356	128.1117	173.9967	Down Regulated
ENSG00000166451	ENSG00000166451.13	CENPN	81006552	81033114	1	mRNA	centromere protein N [Source:HGNC Symbol;Acc:HGNC:30873]	374.847	-0.3266702	0.1412836	0.004534171	0.02234306	795	463	616	316	341	390	261	501	438.4514	487.6376	632.9669	313.3709	300.0224	344.2877	312.4967	463.6826	Down Regulated
ENSG00000233223	ENSG00000233223.2		7581964	7584098	-1	lncRNA	novel transcript, antisense to MPDU1 and CD68	35.68518	-0.4400452	0.2971781	0.0118196	0.04462834	43	45	29	31	37	25	19	4	23.71498	47.39458	29.79877	30.74208	32.55375	22.06973	22.7488	3.702056	Down Regulated
ENSG00000129255	ENSG00000129255.16	MPDU1	7583529	7592789	1	mRNA	mannose-P-dolichol utilization defect 1 [Source:HGNC Symbol;Acc:HGNC:7207]	477.9547	-0.6618061	0.09773078	1.245544e-12	2.016827e-09	974	478	473	410	388	372	269	231	537.1719	503.4358	486.0282	406.5888	341.3744	328.3975	322.0752	213.7938	Down Regulated
ENSG00000233223	ENSG00000233223.2		7581964	7584098	-1	lncRNA	novel transcript, antisense to MPDU1 and CD68	35.68518	-0.4400452	0.2971781	0.0118196	0.04462834	43	45	29	31	37	25	19	4	23.71498	47.39458	29.79877	30.74208	32.55375	22.06973	22.7488	3.702056	Down Regulated
ENSG00000161960	ENSG00000161960.15	EIF4A1	7572824	7579006	1	mRNA	eukaryotic translation initiation factor 4A1 [Source:HGNC Symbol;Acc:HGNC:3282]	336.873	0.2099016	0.08237518	0.005858498	0.02692868	581	265	251	307	393	401	270	375	320.428	279.1014	257.9135	304.4458	345.7736	353.9984	323.2725	347.0678	Up Regulated
ENSG00000273018	ENSG00000273018.6	FAM106A	18511221	18551705	-1	lncRNA	family with sequence similarity 106 member A [Source:HGNC Symbol;Acc:HGNC:25682]	296.3088	0.3374263	0.1018184	0.00024143	0.002561866	432	206	252	302	395	280	235	462	238.2528	216.9619	258.941	299.4874	347.5333	247.1809	281.3668	427.5875	Up Regulated
ENSG00000154874	ENSG00000154874.15	CCDC144BP	18542155	18625447	-1	mRNA	coiled-coil domain containing 144B, pseudogene [Source:HGNC Symbol;Acc:HGNC:26704]	669.4126	0.4425145	0.09762307	8.996648e-07	3.729386e-05	983	576	645	782	892	875	715	1256	542.1355	606.6506	662.7657	775.4938	784.8093	772.4404	856.0734	1162.446	Up Regulated
ENSG00000214719	ENSG00000214719.12		30576464	30672789	1	lncRNA	novel transcript	41.65162	-0.4065624	0.202207	0.005967767	0.02726973	76	40	36	40	33	30	24	30	41.91485	42.12852	36.99157	39.6672	29.03442	26.48367	28.73533	27.76542	Down Regulated
ENSG00000231870	ENSG00000231870.4	KRT17P3	30567700	30571748	-1	mRNA	keratin 17 pseudogene 3 [Source:HGNC Symbol;Acc:HGNC:33697]	56.51862	-0.5453725	0.36127	0.007524365	0.03229134	180	73	79	80	68	72	49	11	99.27202	76.88454	81.17595	79.3344	59.82851	63.56081	58.66797	10.18066	Down Regulated
ENSG00000267658	ENSG00000267658.1	RAB5C-AS1	42154600	42155972	1	lncRNA	RAB5C antisense RNA 1 [Source:HGNC Symbol;Acc:HGNC:55289]	16.93876	-0.6931951	0.3742232	0.003572259	0.01888487	35	12	17	20	7	18	7	6	19.30289	12.63855	17.46824	19.8336	6.158817	15.8902	8.381138	5.553085	Down Regulated
ENSG00000108774	ENSG00000108774.14	RAB5C	42124978	42155044	-1	mRNA	RAB5C, member RAS oncogene family [Source:HGNC Symbol;Acc:HGNC:9785]	1344.244	-0.2501491	0.1011357	0.004902809	0.02373352	2273	1192	1129	1188	1227	1249	991	656	1253.585	1255.43	1160.097	1178.116	1079.553	1102.603	1186.53	607.1373	Down Regulated
ENSG00000198496	ENSG00000198496.11	NBR2	43125551	43153671	1	lncRNA	neighbor of BRCA1 lncRNA 2 [Source:HGNC Symbol;Acc:HGNC:20691]	175.1363	-0.3156861	0.09972569	0.000401115	0.003673327	322	147	199	176	158	145	118	162	177.5866	154.8223	204.4812	174.5357	139.0133	128.0044	141.282	149.9333	Down Regulated
ENSG00000012048	ENSG00000012048.22	BRCA1	43044295	43170245	-1	mRNA	BRCA1 DNA repair associated [Source:HGNC Symbol;Acc:HGNC:1100]	2384.021	-0.4469901	0.1281661	7.005652e-05	0.001036408	6145	2788	3855	1980	2074	2384	1517	3165	3389.036	2936.358	3961.181	1963.526	1824.77	2104.569	1816.312	2929.252	Down Regulated
ENSG00000267080	ENSG00000267080.5	ASB16-AS1	44175968	44186723	-1	lncRNA	ASB16 antisense RNA 1 [Source:HGNC Symbol;Acc:HGNC:25442]	207.0273	-0.2732735	0.1190583	0.006567221	0.0292209	307	193	239	198	237	159	157	119	169.3139	203.2701	245.5829	196.3526	208.52	140.3635	187.977	110.1362	Down Regulated
[truncated: 355 more rows]

## Sheet: dotB
ENSEMBL ID	ENSEMBL ID with Version	Gene name	Gene start(bp)	Gene end(bp)	Strand	Type	Description	baseMean	log2FoldChange	lfcSE	pvalue	padj	Raw Mock1	Raw Mock2	Raw Mock3	Raw Mock4	Raw ΔdotB_A	Raw ΔdotB_B	Raw ΔdotB_C	Raw ΔdotB_D	Norm Mock1	Norm Mock2	Norm Mock3	Norm Mock4	Norm ΔdotB_A	Norm ΔdotB_B	Norm ΔdotB_C	Norm ΔdotB_D	Up/Down Regulation
[truncated: 500 more rows]

[truncated: 9 more sheets: EHEC, EHEC_NT, F.novicida, L.innocua, M.luteus, P.aeruginosa, Radio, S.Typhimurium, Staph]
