# Supplementary material for: CYP1B1-AS1 regulates CYP1B1 to promote Coxiella burnetii pathogenesis by inhibiting ROS and host cell death.
Source: Research Square preprint supplement (doi:10.21203/rs.3.rs-5390645/v1), 2024-12-11
Supplement: Supplementary file 3 [file Data S4. Host Transcriptome Changes in Response to C. burnetii NMII Infection and a List of Differentially Expressed lncRNAs and Associated mRNAs.xlsx]

## Sheet: Sheet1
	CYP1B1-AS1 regulates CYP1B1 to promote Coxiella burnetii pathogenesis by inhibiting ROS and host cell death.
	Arunima et al. 2024
	Data S4. Host Transcriptome Changes in Response to C. burnetii NMII Infection and a List of Differentially Expressed lncRNAs and Associated mRNAs.

## Sheet: Overall transcriptome_Data S4a
ENSEMBL ID	ENSEMBL ID with Version	Gene name	Gene start(bp)	Gene end(bp)	Strand	Type	Description	baseMean	log2FoldChange	lfcSE	pvalue	padj	Raw Mock1	Raw Mock2	Raw Mock3	Raw Mock4	Raw NMII_A	Raw NMII_B	Raw NMII_C	Raw NMII_D	Norm Mock1	Norm Mock2	Norm Mock3	Norm Mock4	Norm NMII_A	Norm NMII_B	Norm NMII_C	Norm NMII_D	Up/Down Regulation
ENSG00000112312	ENSG00000112312.10	GMNN	24774931	24786099	1	mRNA	geminin DNA replication inhibitor [Source:HGNC Symbol;Acc:HGNC:17493]	156.317	-0.835801	0.134428	1.87e-11	2.22e-07	467	207	247	148	124	94	137	127	257.556	218.015	253.803	146.769	128.136	96.9345	121.39	131.077	Down Regulated
ENSG00000176225	ENSG00000176225.13	RTTN	70003031	70205726	-1	mRNA	rotatin [Source:HGNC Symbol;Acc:HGNC:18654]	868.971	-0.640859	0.102207	2.19e-11	2.22e-07	1733	789	1027	642	519	530	598	559	955.769	830.985	1055.29	636.659	536.312	546.546	529.864	576.945	Down Regulated
ENSG00000273703	ENSG00000273703.1	H2BC14	27815022	27815489	1	mRNA	H2B clustered histone 14 [Source:HGNC Symbol;Acc:HGNC:4750]	945.552	-1.3331	0.217908	4.45e-11	3.01e-07	1500	1166	1338	473	373	283	424	411	827.267	1228.05	1374.85	469.065	385.442	291.835	375.689	424.194	Down Regulated
ENSG00000197153	ENSG00000197153.4	H3C12	27890315	27893106	-1	mRNA	H3 clustered histone 12 [Source:HGNC Symbol;Acc:HGNC:4774]	579.489	-1.48583	0.248681	1.06e-10	4.92e-07	1288	822	1029	301	236	197	277	290	710.346	865.741	1057.34	298.496	243.872	203.15	245.439	299.309	Down Regulated
ENSG00000125810	ENSG00000125810.10	CD93	23079360	23086324	-1	mRNA	CD93 molecule [Source:HGNC Symbol;Acc:HGNC:15855]	7398.59	0.474353	0.0786874	1.21e-10	4.92e-07	9878	6361	5620	9173	9510	9403	10400	9081	5447.83	6699.49	5774.8	9096.68	9827.22	9696.55	9215.03	9372.52	Up Regulated
ENSG00000145087	ENSG00000145087.12	STXBP5L	120908072	121424761	1	mRNA	syntaxin binding protein 5L [Source:HGNC Symbol;Acc:HGNC:30757]	386.043	-0.802962	0.13526	1.62e-10	5.49e-07	520	239	316	195	145	108	178	165	286.786	251.718	324.704	193.378	149.837	111.372	157.719	170.297	Down Regulated
ENSG00000122952	ENSG00000122952.17	ZWINT	56357227	56361273	-1	mRNA	ZW10 interacting kinetochore protein [Source:HGNC Symbol;Acc:HGNC:13195]	1242.41	-0.766595	0.13005	2.04e-10	5.92e-07	2073	1037	1359	707	563	568	701	668	1143.28	1092.18	1396.43	701.118	581.78	585.732	621.128	689.444	Down Regulated
ENSG00000146918	ENSG00000146918.19	NCAPG2	158631169	158704804	-1	mRNA	non-SMC condensin II complex subunit G2 [Source:HGNC Symbol;Acc:HGNC:21904]	1495.97	-0.615763	0.103977	2.41e-10	6.11e-07	3076	1593	2054	1196	1016	981	1192	1119	1696.45	1677.77	2110.57	1186.05	1049.89	1011.63	1056.18	1154.92	Down Regulated
ENSG00000171241	ENSG00000171241.9	SHCBP1	46578591	46621379	-1	mRNA	SHC binding and spindle associated 1 [Source:HGNC Symbol;Acc:HGNC:29547]	988.474	-0.744344	0.128016	3.31e-10	7.47e-07	1896	1056	1424	691	667	555	677	619	1045.67	1112.19	1463.22	685.251	689.249	572.326	599.863	638.871	Down Regulated
ENSG00000149269	ENSG00000149269.9	PAK1	77322017	77474635	-1	mRNA	p21 (RAC1) activated kinase 1 [Source:HGNC Symbol;Acc:HGNC:8590]	1836.3	-0.434543	0.0743111	4.01e-10	7.73e-07	4623	2160	2434	1670	1568	1594	1863	1591	2549.64	2274.94	2501.04	1656.11	1620.3	1643.76	1650.73	1642.07	Down Regulated
ENSG00000010278	ENSG00000010278.14	CD9	6199715	6238271	1	mRNA	CD9 molecule [Source:HGNC Symbol;Acc:HGNC:1709]	1465.18	0.867165	0.150474	4.19e-10	7.73e-07	1295	1398	1087	2325	2462	2612	2992	2585	714.207	1472.39	1116.94	2305.66	2544.12	2693.54	2651.09	2667.98	Up Regulated
ENSG00000085840	ENSG00000085840.13	ORC1	52372829	52404423	-1	mRNA	origin recognition complex subunit 1 [Source:HGNC Symbol;Acc:HGNC:8487]	1008.2	-0.727423	0.127475	6.41e-10	1.09e-06	2770	1165	1467	845	730	704	850	742	1527.69	1226.99	1507.41	837.97	754.35	725.978	753.151	765.819	Down Regulated
ENSG00000127423	ENSG00000127423.10	AUNIP	25831913	25859458	-1	mRNA	aurora kinase A and ninein interacting protein [Source:HGNC Symbol;Acc:HGNC:28363]	142.619	-0.714974	0.125661	7.5e-10	1.1e-06	393	182	226	171	102	104	150	131	216.744	191.685	232.225	169.577	105.402	107.247	132.909	135.205	Down Regulated
ENSG00000181938	ENSG00000181938.13	GINS3	58295080	58406147	1	mRNA	GINS complex subunit 3 [Source:HGNC Symbol;Acc:HGNC:25851]	306.622	-0.617199	0.108424	7.57e-10	1.1e-06	801	376	443	280	235	227	292	259	441.76	396.008	455.202	277.67	242.839	234.087	258.73	267.314	Down Regulated
ENSG00000164070	ENSG00000164070.12	HSPA4L	127781821	127840733	1	mRNA	heat shock protein family A (Hsp70) member 4 like [Source:HGNC Symbol;Acc:HGNC:17041]	582.748	-0.625998	0.110212	8.19e-10	1.1e-06	1274	561	704	439	354	397	430	387	702.625	590.852	723.391	435.348	365.808	409.394	381.006	399.423	Down Regulated
ENSG00000156876	ENSG00000156876.10	SASS6	100083563	100132955	-1	mRNA	SAS-6 centriolar assembly protein [Source:HGNC Symbol;Acc:HGNC:25403]	535.722	-0.635627	0.111674	8.65e-10	1.1e-06	1186	521	773	452	389	338	456	374	654.092	548.724	794.291	448.239	401.976	348.552	404.043	386.006	Down Regulated
ENSG00000135931	ENSG00000135931.17	ARMC9	231198546	231376848	1	mRNA	armadillo repeat containing 9 [Source:HGNC Symbol;Acc:HGNC:20730]	1277.33	0.773909	0.139799	1.62e-09	1.94e-06	1196	653	683	1663	1584	1609	1764	1607	659.607	687.748	701.812	1649.16	1636.84	1659.23	1563.01	1658.59	Up Regulated
ENSG00000197093	ENSG00000197093.11	GAL3ST4	100159244	100168617	-1	mRNA	galactose-3-O-sulfotransferase 4 [Source:HGNC Symbol;Acc:HGNC:24145]	83.8158	-1.60581	0.291543	1.74e-09	1.96e-06	477	169	119	61	51	43	50	50	263.071	177.993	122.278	60.4925	52.7012	44.3424	44.303	51.6051	Down Regulated
ENSG00000165304	ENSG00000165304.8	MELK	36572862	36677683	1	mRNA	maternal embryonic leucine zipper kinase [Source:HGNC Symbol;Acc:HGNC:16870]	672.764	-0.784655	0.143865	2.58e-09	2.76e-06	1426	826	1057	493	448	387	519	477	786.455	869.954	1086.11	488.898	462.944	399.081	459.865	492.312	Down Regulated
ENSG00000140525	ENSG00000140525.17	FANCI	89243945	89317261	1	mRNA	FA complementation group I [Source:HGNC Symbol;Acc:HGNC:25568]	1336.4	-0.77602	0.143944	3.69e-09	3.75e-06	3075	1496	2053	915	846	770	994	973	1695.9	1575.61	2109.55	907.387	874.22	794.038	880.744	1004.23	Down Regulated
ENSG00000106462	ENSG00000106462.10	EZH2	148807257	148884321	-1	mRNA	enhancer of zeste 2 polycomb repressive complex 2 subunit [Source:HGNC Symbol;Acc:HGNC:3527]	1055.36	-0.585565	0.108594	4.25e-09	3.95e-06	2096	1050	1420	788	704	721	811	716	1155.97	1105.87	1459.11	781.444	727.483	743.508	718.595	738.985	Down Regulated
ENSG00000120334	ENSG00000120334.15	CENPL	173799550	173824883	-1	mRNA	centromere protein L [Source:HGNC Symbol;Acc:HGNC:17879]	671.19	-0.630087	0.117097	4.28e-09	3.95e-06	1309	843	1001	594	523	471	580	472	721.928	887.858	1028.57	589.058	540.445	485.704	513.915	487.152	Down Regulated
ENSG00000111602	ENSG00000111602.12	TIMELESS	56416363	56449426	-1	mRNA	timeless circadian regulator [Source:HGNC Symbol;Acc:HGNC:11813]	805.142	-0.744056	0.139851	5.58e-09	4.93e-06	2050	863	1270	595	511	527	643	615	1130.6	908.923	1304.98	590.05	528.045	543.452	569.737	634.743	Down Regulated
ENSG00000145703	ENSG00000145703.16	IQGAP2	76403285	76708132	1	mRNA	IQ motif containing GTPase activating protein 2 [Source:HGNC Symbol;Acc:HGNC:6111]	1321.69	0.59745	0.112556	6.47e-09	5.03e-06	1345	1218	1225	1675	1868	1859	2163	1831	741.783	1282.81	1258.74	1661.06	1930.31	1917.03	1916.55	1889.78	Up Regulated
ENSG00000274267	ENSG00000274267.1		NA	NA	NA	mRNA		2009.49	-1.22098	0.231978	6.49e-09	5.03e-06	4305	2639	3192	1257	895	909	1137	1024	2374.26	2779.43	3279.92	1246.54	924.854	937.377	1007.45	1056.87	Down Regulated
ENSG00000276410	ENSG00000276410.3	H2BC3	26043227	26043713	-1	mRNA	H2B clustered histone 3 [Source:HGNC Symbol;Acc:HGNC:4751]	1005.65	-1.25105	0.237778	6.51e-09	5.03e-06	1931	1359	1739	611	481	436	504	529	1064.97	1431.32	1786.9	605.917	497.044	449.611	446.574	545.982	Down Regulated
ENSG00000257017	ENSG00000257017.8	HP	72054505	72061055	1	mRNA	haptoglobin [Source:HGNC Symbol;Acc:HGNC:5141]	21.8858	-2.19368	0.412424	6.69e-09	5.03e-06	195	23	35	11	2	9	13	13	107.545	24.2239	35.964	10.9085	2.06671	9.28096	11.5188	13.4173	Down Regulated
ENSG00000181019	ENSG00000181019.13	NQO1	69706996	69726668	-1	mRNA	NAD(P)H quinone dehydrogenase 1 [Source:HGNC Symbol;Acc:HGNC:2874]	3738.48	0.542282	0.102764	8.41e-09	6.1e-06	7154	3318	2975	6286	5828	6226	7194	5936	3945.51	3494.56	3056.94	6233.7	6022.4	6420.36	6374.32	6126.56	Up Regulated
ENSG00000103995	ENSG00000103995.14	CEP152	48712928	48811146	-1	mRNA	centrosomal protein 152 [Source:HGNC Symbol;Acc:HGNC:29298]	828.377	-0.623143	0.11889	9.26e-09	6.48e-06	1678	854	1326	664	599	558	670	620	925.436	899.444	1362.52	658.476	618.981	575.42	593.66	639.903	Down Regulated
ENSG00000144554	ENSG00000144554.10	FANCD2	10026370	10101932	1	mRNA	FA complementation group D2 [Source:HGNC Symbol;Acc:HGNC:3585]	1250.31	-0.650016	0.124624	1.04e-08	7.07e-06	2734	1233	1702	952	876	739	959	861	1507.83	1298.61	1748.88	944.079	905.22	762.07	849.732	888.64	Down Regulated
ENSG00000119969	ENSG00000119969.15	HELLS	94501434	94613905	1	mRNA	helicase, lymphoid specific [Source:HGNC Symbol;Acc:HGNC:4861]	1407.57	-0.739605	0.142429	1.11e-08	7.11e-06	2183	827	1292	617	616	495	600	629	1203.95	871.007	1327.59	611.867	636.548	510.453	531.636	649.192	Down Regulated
ENSG00000051341	ENSG00000051341.14	POLQ	121431431	121545988	-1	mRNA	DNA polymerase theta [Source:HGNC Symbol;Acc:HGNC:9186]	1614.75	-0.652042	0.125356	1.12e-08	7.11e-06	3097	1499	2262	1165	1016	940	1198	1066	1708.03	1578.77	2324.3	1155.31	1049.89	969.345	1061.5	1100.22	Down Regulated
ENSG00000197971	ENSG00000197971.15	MBP	76978827	77133683	-1	mRNA	myelin basic protein [Source:HGNC Symbol;Acc:HGNC:6925]	9894.44	0.295692	0.0555089	1.26e-08	7.38e-06	15244	9351	8609	11831	11807	11404	13726	11669	8407.24	9848.59	8846.12	11732.6	12200.8	11760	12162.1	12043.6	Up Regulated
ENSG00000165029	ENSG00000165029.16	ABCA1	104781006	104928155	-1	mRNA	ATP binding cassette subfamily A member 1 [Source:HGNC Symbol;Acc:HGNC:29]	5543.15	0.864466	0.167727	1.27e-08	7.38e-06	4327	3227	4056	8129	8124	8156	9746	8438	2386.39	3398.72	4167.72	8061.37	8394.99	8410.62	8635.54	8708.87	Up Regulated
ENSG00000143476	ENSG00000143476.18	DTL	212035553	212107400	1	mRNA	denticleless E3 ubiquitin protein ligase homolog [Source:HGNC Symbol;Acc:HGNC:30288]	1757.11	-0.61278	0.118188	1.27e-08	7.38e-06	4173	1996	2564	1621	1298	1295	1523	1429	2301.46	2102.21	2634.62	1607.51	1341.3	1335.43	1349.47	1474.87	Down Regulated
ENSG00000133119	ENSG00000133119.13	RFC3	33818069	33966558	1	mRNA	replication factor C subunit 3 [Source:HGNC Symbol;Acc:HGNC:9971]	728.507	-0.631334	0.122185	1.4e-08	7.7e-06	2253	841	1085	625	558	577	689	627	1242.55	885.752	1114.88	619.8	576.613	595.013	610.495	647.128	Down Regulated
ENSG00000135298	ENSG00000135298.14	ADGRB3	68635282	69390571	1	mRNA	adhesion G protein-coupled receptor B3 [Source:HGNC Symbol;Acc:HGNC:945]	115.169	-0.906617	0.175269	1.4e-08	7.7e-06	282	74	92	67	48	46	60	56	155.526	77.9378	94.534	66.4426	49.6011	47.436	53.1636	57.7977	Down Regulated
ENSG00000117748	ENSG00000117748.10	RPA2	27891524	27914746	-1	mRNA	replication protein A2 [Source:HGNC Symbol;Acc:HGNC:10290]	675.426	-0.483704	0.0931065	1.45e-08	7.77e-06	1921	894	953	751	652	571	731	682	1059.45	941.572	979.249	744.752	673.748	588.826	647.71	703.893	Down Regulated
ENSG00000083720	ENSG00000083720.13	OXCT1	41730065	41870425	-1	mRNA	3-oxoacid CoA-transferase 1 [Source:HGNC Symbol;Acc:HGNC:8527]	656.785	-0.56632	0.109706	1.52e-08	7.94e-06	942	511	575	357	314	272	388	358	519.524	538.192	590.838	354.03	324.474	280.491	343.791	369.492	Down Regulated
ENSG00000130340	ENSG00000130340.15	SNX9	157700387	157945077	1	mRNA	sorting nexin 9 [Source:HGNC Symbol;Acc:HGNC:14973]	2612.68	0.53146	0.103135	1.64e-08	8.23e-06	2660	1815	1460	2782	2680	2788	3169	2753	1467.02	1911.58	1500.21	2758.85	2769.4	2875.04	2807.92	2841.38	Up Regulated
ENSG00000129173	ENSG00000129173.13	E2F8	19224063	19241620	-1	mRNA	E2F transcription factor 8 [Source:HGNC Symbol;Acc:HGNC:24727]	543.574	-0.82188	0.161012	1.69e-08	8.23e-06	1263	584	856	365	326	337	362	373	696.559	615.076	879.577	361.963	336.874	347.521	320.754	384.974	Down Regulated
ENSG00000174371	ENSG00000174371.17	EXO1	241847967	241895148	1	mRNA	exonuclease 1 [Source:HGNC Symbol;Acc:HGNC:3511]	1151.69	-0.72581	0.141985	1.71e-08	8.23e-06	3388	1604	2057	1091	913	924	1113	1032	1868.52	1689.35	2113.66	1081.92	943.455	952.846	986.185	1065.13	Down Regulated
ENSG00000131981	ENSG00000131981.16	LGALS3	55124110	55145423	1	mRNA	galectin 3 [Source:HGNC Symbol;Acc:HGNC:6563]	1473.91	0.473594	0.0919449	1.81e-08	8.34e-06	1847	1315	1188	1906	1858	1875	2164	1966	1018.64	1384.97	1220.72	1890.14	1919.98	1933.53	1917.43	2029.11	Up Regulated
ENSG00000137941	ENSG00000137941.17	TTLL7	83865024	83999150	-1	mRNA	tubulin tyrosine ligase like 7 [Source:HGNC Symbol;Acc:HGNC:26242]	144.803	-0.781979	0.153377	1.86e-08	8.39e-06	365	141	227	125	88	93	106	114	201.302	148.503	233.252	123.96	90.9354	95.9033	93.9224	117.66	Down Regulated
ENSG00000149636	ENSG00000149636.15	DSN1	36751791	36773818	-1	mRNA	DSN1 component of MIS12 kinetochore complex [Source:HGNC Symbol;Acc:HGNC:16165]	615.6	-0.553112	0.108666	2.24e-08	9.57e-06	1588	840	978	691	531	534	659	590	875.8	884.699	1004.94	685.251	548.712	550.671	583.914	608.94	Down Regulated
ENSG00000171848	ENSG00000171848.15	RRM2	10120698	10211725	1	mRNA	ribonucleotide reductase regulatory subunit M2 [Source:HGNC Symbol;Acc:HGNC:10452]	1821.39	-0.882833	0.175101	2.27e-08	9.57e-06	4889	2224	3146	1310	1178	1054	1418	1367	2696.34	2342.35	3232.65	1299.1	1217.29	1086.9	1256.43	1410.88	Down Regulated
ENSG00000149548	ENSG00000149548.15	CCDC15	124954121	125041489	1	mRNA	coiled-coil domain containing 15 [Source:HGNC Symbol;Acc:HGNC:25798]	285.49	-0.566226	0.11342	2.31e-08	9.57e-06	612	375	427	290	228	246	263	221	337.525	394.955	438.761	287.587	235.605	253.68	233.034	228.094	Down Regulated
ENSG00000102384	ENSG00000102384.13	CENPI	101098188	101166126	1	mRNA	centromere protein I [Source:HGNC Symbol;Acc:HGNC:3968]	341.892	-0.737155	0.14602	2.37e-08	9.62e-06	748	407	510	249	245	206	260	230	412.53	428.658	524.047	246.928	253.172	212.431	230.376	237.383	Down Regulated
ENSG00000168913	ENSG00000168913.7	ENHO	34521043	34522990	-1	mRNA	energy homeostasis associated [Source:HGNC Symbol;Acc:HGNC:24838]	33.4111	-2.0078	0.400922	2.49e-08	9.93e-06	283	87	103	21	19	28	21	17	156.078	91.6295	105.837	20.8253	19.6338	28.8741	18.6073	17.5457	Down Regulated
ENSG00000146670	ENSG00000146670.10	CDCA5	65066300	65084164	-1	mRNA	cell division cycle associated 5 [Source:HGNC Symbol;Acc:HGNC:14626]	655.5	-0.836399	0.166585	2.57e-08	1e-05	1664	937	1235	611	487	451	562	547	917.715	986.86	1269.02	605.917	503.245	465.079	497.966	564.56	Down Regulated
ENSG00000092853	ENSG00000092853.14	CLSPN	35720218	35769978	-1	mRNA	claspin [Source:HGNC Symbol;Acc:HGNC:19715]	1444.02	-0.727582	0.144897	2.72e-08	1.04e-05	3183	1467	2388	1165	1015	969	975	1082	1755.46	1545.06	2453.77	1155.31	1048.86	999.251	863.909	1116.73	Down Regulated
ENSG00000137819	ENSG00000137819.13	PAQR5	69298912	69407780	1	mRNA	progestin and adipoQ receptor family member 5 [Source:HGNC Symbol;Acc:HGNC:29645]	1716.01	0.649165	0.129106	2.77e-08	1.04e-05	2032	1272	1075	2291	2329	2290	2561	2325	1120.67	1339.69	1104.61	2271.94	2406.69	2361.49	2269.2	2399.64	Up Regulated
ENSG00000163507	ENSG00000163507.14	CIP2A	108549864	108589644	-1	mRNA	cellular inhibitor of PP2A [Source:HGNC Symbol;Acc:HGNC:29302]	588.377	-0.726147	0.144973	2.93e-08	1.08e-05	1399	596	942	424	411	352	444	433	771.564	627.715	967.946	420.472	424.71	362.989	393.411	446.9	Down Regulated
ENSG00000071539	ENSG00000071539.14	TRIP13	892884	919357	1	mRNA	thyroid hormone receptor interactor 13 [Source:HGNC Symbol;Acc:HGNC:12307]	507.195	-0.659791	0.131528	2.96e-08	1.08e-05	797	431	508	273	257	224	300	263	439.554	453.935	521.992	270.729	265.573	230.993	265.818	271.443	Down Regulated
ENSG00000137804	ENSG00000137804.13	NUSAP1	41320794	41381050	1	mRNA	nucleolar and spindle associated protein 1 [Source:HGNC Symbol;Acc:HGNC:18538]	276.024	-0.813253	0.163398	3.23e-08	1.15e-05	587	351	489	273	216	189	219	182	323.737	369.678	502.469	270.729	223.205	194.9	194.047	187.842	Down Regulated
ENSG00000128050	ENSG00000128050.8	PAICS	56435741	56464578	1	mRNA	phosphoribosylaminoimidazole carboxylase and phosphoribosylaminoimidazolesuccinocarboxamide synthase [Source:HGNC Symbol;Acc:HGNC:8587]	3468.4	-0.444028	0.0879457	3.37e-08	1.17e-05	9160	3419	3974	2955	2721	2712	3144	2817	5051.84	3600.93	4083.46	2930.41	2811.76	2796.66	2785.77	2907.43	Down Regulated
ENSG00000276180	ENSG00000276180.1	H4C9	27139282	27139678	1	mRNA	H4 clustered histone 9 [Source:HGNC Symbol;Acc:HGNC:4793]	932.845	-1.05114	0.212426	3.48e-08	1.17e-05	1669	1263	1303	576	442	455	592	437	920.472	1330.21	1338.89	571.208	456.744	469.204	524.548	451.028	Down Regulated
ENSG00000176890	ENSG00000176890.16	TYMS	657653	673578	1	mRNA	thymidylate synthetase [Source:HGNC Symbol;Acc:HGNC:12441]	197.878	-0.853479	0.172055	3.6e-08	1.17e-05	450	197	272	121	113	91	121	133	248.18	207.483	279.492	119.993	116.769	93.8409	107.213	137.27	Down Regulated
ENSG00000184445	ENSG00000184445.12	KNTC1	122527246	122626396	1	mRNA	kinetochore associated 1 [Source:HGNC Symbol;Acc:HGNC:17255]	2392.06	-0.516121	0.103087	3.64e-08	1.17e-05	5647	2671	3466	2065	1982	1820	2184	1953	3114.38	2813.13	3561.47	2047.82	2048.11	1876.82	1935.16	2015.69	Down Regulated
ENSG00000143493	ENSG00000143493.13	INTS7	211940399	212035557	-1	mRNA	integrator complex subunit 7 [Source:HGNC Symbol;Acc:HGNC:24484]	1249.19	-0.401348	0.0793834	3.64e-08	1.17e-05	2800	1183	1577	1120	1000	977	1208	971	1544.23	1245.95	1620.44	1110.68	1033.36	1007.5	1070.36	1002.17	Down Regulated
ENSG00000227739	ENSG00000227739.10	TUBB	30710059	30715284	1	mRNA	tubulin beta class I [Source:HGNC Symbol;Acc:HGNC:20778]	1088.42	-0.704918	0.141944	3.67e-08	1.17e-05	1755	1030	1201	595	568	512	647	589	967.902	1084.81	1234.08	590.05	586.947	527.984	573.281	607.908	Down Regulated
ENSG00000124575	ENSG00000124575.6	H1-3	26234212	26234987	-1	mRNA	H1.3 linker histone, cluster member [Source:HGNC Symbol;Acc:HGNC:4717]	1883.59	-0.9865	0.199722	3.7e-08	1.17e-05	5323	3364	4073	1652	1370	1346	1628	1605	2935.69	3543.01	4185.19	1638.26	1415.7	1388.02	1442.51	1656.52	Down Regulated
ENSG00000198431	ENSG00000198431.16	TXNRD1	104215779	104350307	1	mRNA	thioredoxin reductase 1 [Source:HGNC Symbol;Acc:HGNC:12437]	8242.6	0.446322	0.0888933	3.84e-08	1.2e-05	12808	6272	6246	10420	10132	10258	12071	10240	7063.76	6605.75	6418.04	10333.3	10470	10578.2	10695.6	10568.7	Up Regulated
ENSG00000172578	ENSG00000172578.12	KLHL6	183487551	183555706	-1	mRNA	kelch like family member 6 [Source:HGNC Symbol;Acc:HGNC:18653]	1545.64	0.313459	0.0616004	4.09e-08	1.21e-05	2430	1349	1439	1917	1867	1962	2096	1844	1340.17	1420.78	1478.64	1901.05	1929.28	2023.25	1857.18	1903.2	Up Regulated
ENSG00000104738	ENSG00000104738.17	MCM4	47960185	47978160	1	mRNA	minichromosome maintenance complex component 4 [Source:HGNC Symbol;Acc:HGNC:6947]	6156.44	-0.538711	0.108246	4.1e-08	1.21e-05	16216	7094	8692	5347	4794	4825	5821	5307	8943.31	7471.49	8931.41	5302.51	4953.91	4975.63	5157.76	5477.36	Down Regulated
ENSG00000085999	ENSG00000085999.12	RAD54L	46246461	46278480	1	mRNA	RAD54 like [Source:HGNC Symbol;Acc:HGNC:9826]	426.471	-0.63625	0.128417	4.18e-08	1.21e-05	768	362	545	241	235	232	306	239	423.561	381.263	560.011	238.995	242.839	239.243	271.134	246.672	Down Regulated
ENSG00000118495	ENSG00000118495.19	PLAGL1	143940300	144064599	-1	mRNA	PLAG1 like zinc finger 1 [Source:HGNC Symbol;Acc:HGNC:9046]	862.218	-0.422505	0.08412	4.18e-08	1.21e-05	1711	634	802	608	525	550	589	589	943.636	667.737	824.09	602.941	542.512	567.17	521.889	607.908	Down Regulated
ENSG00000138796	ENSG00000138796.16	HADH	107989714	108035241	1	mRNA	hydroxyacyl-CoA dehydrogenase [Source:HGNC Symbol;Acc:HGNC:4799]	1588.13	-0.27914	0.0547411	4.7e-08	1.35e-05	3341	1778	2003	1586	1444	1484	1700	1414	1842.6	1872.61	2058.17	1572.8	1492.17	1530.33	1506.3	1459.39	Down Regulated
ENSG00000106823	ENSG00000106823.12	ECM2	92493554	92536655	-1	mRNA	extracellular matrix protein 2 [Source:HGNC Symbol;Acc:HGNC:3154]	227.125	-0.994792	0.203794	5.12e-08	1.44e-05	388	148	250	106	93	87	92	80	213.986	155.876	256.886	105.118	96.1022	89.716	81.5175	82.5681	Down Regulated
ENSG00000214018	ENSG00000214018.3	RRM2P3	44309314	44310476	-1	mRNA	ribonucleotide reductase M2 polypeptide pseudogene 3 [Source:HGNC Symbol;Acc:HGNC:10455]	102.205	-0.955941	0.193111	5.19e-08	1.44e-05	284	130	176	81	72	50	80	76	156.629	136.918	180.848	80.3261	74.4017	51.5609	70.8848	78.4397	Down Regulated
ENSG00000198700	ENSG00000198700.10	IPO9	201829149	201884291	1	mRNA	importin 9 [Source:HGNC Symbol;Acc:HGNC:19425]	3669.45	-0.247901	0.0484863	5.35e-08	1.47e-05	7248	3503	3886	3162	3050	3017	3392	3016	3997.35	3689.4	3993.03	3135.69	3151.74	3111.19	3005.52	3112.82	Down Regulated
ENSG00000112118	ENSG00000112118.19	MCM3	52264014	52284881	-1	mRNA	minichromosome maintenance complex component 3 [Source:HGNC Symbol;Acc:HGNC:6945]	4298.57	-0.53803	0.109505	5.67e-08	1.54e-05	11618	4696	5994	3604	3373	3260	3875	3749	6407.46	4945.89	6159.1	3574.01	3485.51	3361.77	3433.48	3869.35	Down Regulated
ENSG00000146263	ENSG00000146263.11	MMS22L	97142161	97283217	-1	mRNA	MMS22 like, DNA repair protein [Source:HGNC Symbol;Acc:HGNC:21475]	1858.18	-0.590309	0.120564	5.8e-08	1.55e-05	4062	1679	2382	1410	1229	1141	1442	1302	2240.24	1768.34	2447.61	1398.27	1270	1176.62	1277.7	1343.8	Down Regulated
ENSG00000275714	ENSG00000275714.1	H3C1	26020451	26020958	1	mRNA	H3 clustered histone 1 [Source:HGNC Symbol;Acc:HGNC:4766]	268.214	-1.31813	0.272903	6.02e-08	1.57e-05	700	415	521	193	131	132	172	150	386.058	437.083	535.35	191.394	135.37	136.121	152.402	154.815	Down Regulated
ENSG00000159147	ENSG00000159147.18	DONSON	33559542	33588706	-1	mRNA	DNA replication fork stabilization factor DONSON [Source:HGNC Symbol;Acc:HGNC:2993]	532.066	-0.550264	0.112483	6.29e-08	1.62e-05	1235	548	721	413	383	400	445	389	681.116	577.161	740.859	409.564	395.776	412.487	394.297	401.488	Down Regulated
ENSG00000114541	ENSG00000114541.15	FRMD4B	69168782	69542583	-1	mRNA	FERM domain containing 4B [Source:HGNC Symbol;Acc:HGNC:24886]	1755.03	0.308941	0.0617859	6.58e-08	1.67e-05	2450	1558	1589	1914	2015	1977	2330	1912	1351.2	1640.91	1632.77	1898.08	2082.21	2038.72	2064.52	1973.38	Up Regulated
ENSG00000012048	ENSG00000012048.22	BRCA1	43044295	43170245	-1	mRNA	BRCA1 DNA repair associated [Source:HGNC Symbol;Acc:HGNC:1100]	2384.02	-0.628158	0.12947	6.95e-08	1.74e-05	6145	2788	3855	1980	1883	1735	2155	1969	3389.04	2936.36	3961.18	1963.53	1945.81	1789.16	1909.46	2032.21	Down Regulated
ENSG00000111879	ENSG00000111879.19	FAM184A	118959763	119149387	-1	mRNA	family with sequence similarity 184 member A [Source:HGNC Symbol;Acc:HGNC:20991]	269.766	-0.587433	0.120732	7.01e-08	1.74e-05	658	304	327	231	194	198	226	199	362.894	320.177	336.007	229.078	200.471	204.181	200.25	205.388	Down Regulated
ENSG00000125885	ENSG00000125885.13	MCM8	5950652	5998977	1	mRNA	minichromosome maintenance 8 homologous recombination repair factor [Source:HGNC Symbol;Acc:HGNC:16147]	182.186	-0.669217	0.138174	7.22e-08	1.77e-05	490	208	297	147	156	140	144	137	270.24	219.068	305.18	145.777	161.204	144.371	127.593	141.398	Down Regulated
ENSG00000275713	ENSG00000275713.2	H2BC9	26251614	26252075	1	mRNA	H2B clustered histone 9 [Source:HGNC Symbol;Acc:HGNC:4755]	1284.06	-1.273	0.265898	7.43e-08	1.8e-05	2920	1994	2376	802	622	601	732	746	1610.41	2100.11	2441.44	795.327	642.748	619.762	648.596	769.948	Down Regulated
ENSG00000189212	ENSG00000189212.12	DPY19L2P1	35079989	35186248	-1	mRNA	DPY19L2 pseudogene 1 [Source:HGNC Symbol;Acc:HGNC:22305]	145.496	-0.73095	0.151642	7.94e-08	1.9e-05	321	120	183	129	100	80	95	89	177.035	126.386	188.04	127.927	103.336	82.4975	84.1757	91.857	Down Regulated
ENSG00000167378	ENSG00000167378.8	IRGQ	43584367	43596134	-1	mRNA	immunity related GTPase Q [Source:HGNC Symbol;Acc:HGNC:24868]	4097.17	0.492878	0.101715	8.43e-08	1.99e-05	3181	2728	1896	3319	3593	3496	3917	3319	1754.36	2873.16	1948.22	3291.39	3712.85	3605.14	3470.7	3425.55	Up Regulated
ENSG00000117632	ENSG00000117632.23	STMN1	25884181	25906991	-1	mRNA	stathmin 1 [Source:HGNC Symbol;Acc:HGNC:6510]	3941.85	-0.701407	0.146222	8.58e-08	2e-05	9437	4561	6360	3072	2786	2571	3258	3093	5204.61	4803.7	6535.18	3046.44	2878.93	2651.26	2886.78	3192.29	Down Regulated
ENSG00000058668	ENSG00000058668.14	ATP2B4	203626787	203744081	1	mRNA	ATPase plasma membrane Ca2+ transporting 4 [Source:HGNC Symbol;Acc:HGNC:817]	5674.82	-0.566349	0.117687	9.07e-08	2.09e-05	11355	3703	4751	3326	2850	2720	3327	3239	6262.41	3900.05	4881.86	3298.33	2945.07	2804.91	2947.92	3342.98	Down Regulated
ENSG00000144354	ENSG00000144354.14	CDCA7	173354820	173368997	1	mRNA	cell division cycle associated 7 [Source:HGNC Symbol;Acc:HGNC:14628]	553.206	-0.638403	0.13335	9.67e-08	2.21e-05	1558	591	753	469	384	383	498	447	859.254	622.449	773.74	465.098	396.809	394.957	441.258	461.349	Down Regulated
ENSG00000101868	ENSG00000101868.10	POLA1	24693873	24996986	1	mRNA	DNA polymerase alpha 1, catalytic subunit [Source:HGNC Symbol;Acc:HGNC:9173]	1051.04	-0.51852	0.10829	1.09e-07	2.46e-05	2495	1208	1503	821	880	781	949	824	1376.02	1272.28	1544.4	814.169	909.354	805.381	840.871	850.452	Down Regulated
ENSG00000187741	ENSG00000187741.15	FANCA	89726683	89816977	-1	mRNA	FA complementation group A [Source:HGNC Symbol;Acc:HGNC:3582]	650.328	-0.616194	0.129466	1.13e-07	2.52e-05	1400	570	726	434	399	353	443	431	772.116	600.331	745.997	430.389	412.309	364.02	392.525	444.836	Down Regulated
ENSG00000134779	ENSG00000134779.15	TPGS2	36777647	36829216	-1	mRNA	tubulin polyglutamylase complex subunit 2 [Source:HGNC Symbol;Acc:HGNC:24561]	1968.13	-0.352166	0.0724684	1.15e-07	2.53e-05	5591	2570	3003	2348	2096	2138	2272	2192	3083.5	2706.76	3085.71	2328.46	2165.92	2204.74	2013.13	2262.37	Down Regulated
ENSG00000184270	ENSG00000184270.5	H2AC21	149887469	149887965	-1	mRNA	H2A clustered histone 21 [Source:HGNC Symbol;Acc:HGNC:20508]	1028.56	-0.921437	0.196301	1.27e-07	2.76e-05	1861	1458	1777	759	582	561	762	698	1026.36	1535.58	1825.95	752.685	601.413	578.513	675.178	720.407	Down Regulated
ENSG00000134830	ENSG00000134830.5	C5AR2	47332175	47347329	1	mRNA	complement C5a receptor 2 [Source:HGNC Symbol;Acc:HGNC:4527]	2278.33	0.999096	0.213295	1.3e-07	2.79e-05	979	1383	798	2709	2689	3103	3316	2624	539.929	1456.59	819.98	2686.46	2778.7	3199.87	2938.18	2708.23	Up Regulated
ENSG00000097046	ENSG00000097046.13	CDC7	91500851	91525764	1	mRNA	cell division cycle 7 [Source:HGNC Symbol;Acc:HGNC:1745]	553.773	-0.563366	0.118872	1.3e-07	2.79e-05	1219	614	771	463	429	352	479	444	672.292	646.673	792.236	459.148	443.31	362.989	424.423	458.253	Down Regulated
ENSG00000110090	ENSG00000110090.13	CPT1A	68754620	68844410	-1	mRNA	carnitine palmitoyltransferase 1A [Source:HGNC Symbol;Acc:HGNC:2328]	1712.13	0.38818	0.0807712	1.33e-07	2.82e-05	2482	1044	990	1761	1694	1670	1924	1754	1368.85	1099.55	1017.27	1746.35	1750.51	1722.13	1704.78	1810.31	Up Regulated
ENSG00000134291	ENSG00000134291.12	TMEM106C	47963569	47968878	1	mRNA	transmembrane protein 106C [Source:HGNC Symbol;Acc:HGNC:28775]	527.694	-0.816236	0.174182	1.37e-07	2.86e-05	1431	934	1174	546	488	463	519	453	789.213	983.701	1206.34	541.457	504.278	477.454	459.865	467.542	Down Regulated
ENSG00000159259	ENSG00000159259.8	CHAF1B	36385392	36419015	1	mRNA	chromatin assembly factor 1 subunit B [Source:HGNC Symbol;Acc:HGNC:1911]	431.597	-0.593839	0.125829	1.39e-07	2.86e-05	1027	523	618	372	301	282	408	386	566.402	550.83	635.022	368.905	311.04	290.804	361.513	398.391	Down Regulated
ENSG00000185950	ENSG00000185950.9	IRS2	109752695	109786583	-1	mRNA	insulin receptor substrate 2 [Source:HGNC Symbol;Acc:HGNC:6126]	2251.84	0.532599	0.112562	1.4e-07	2.86e-05	2213	1205	1156	1938	1833	2034	2595	1971	1220.49	1269.12	1187.84	1921.88	1894.14	2097.5	2299.33	2034.27	Up Regulated
ENSG00000180998	ENSG00000180998.12	GPR137C	52552836	52637713	1	mRNA	G protein-coupled receptor 137C [Source:HGNC Symbol;Acc:HGNC:25445]	99.8238	-0.876929	0.186837	1.48e-07	2.98e-05	149	49	87	61	42	39	38	31	82.1752	51.6074	89.3963	60.4925	43.401	40.2175	33.6703	31.9952	Down Regulated
ENSG00000111445	ENSG00000111445.14	RFC5	118013588	118033130	1	mRNA	replication factor C subunit 5 [Source:HGNC Symbol;Acc:HGNC:9973]	526.479	-0.552481	0.117135	1.48e-07	2.98e-05	1582	700	865	476	459	477	498	547	872.491	737.249	888.825	472.04	474.311	491.891	441.258	564.56	Down Regulated
ENSG00000188312	ENSG00000188312.14	CENPP	92325953	92620529	1	mRNA	centromere protein P [Source:HGNC Symbol;Acc:HGNC:32933]	237.665	-0.604124	0.128542	1.58e-07	3.15e-05	560	230	285	183	157	133	196	178	308.846	242.239	292.85	181.477	162.237	137.152	173.668	183.714	Down Regulated
ENSG00000140416	ENSG00000140416.21	TPM1	63042632	63071915	1	mRNA	tropomyosin 1 [Source:HGNC Symbol;Acc:HGNC:12010]	759.79	-0.260907	0.0535179	1.67e-07	3.27e-05	1994	1064	1102	992	954	822	1017	821	1099.71	1120.62	1132.35	983.747	985.822	847.661	901.123	847.355	Down Regulated
ENSG00000106809	ENSG00000106809.11	OGN	92383268	92404696	-1	mRNA	osteoglycin [Source:HGNC Symbol;Acc:HGNC:8126]	171.15	-0.962217	0.207389	1.67e-07	3.27e-05	286	127	207	100	80	64	85	67	157.732	133.758	212.702	99.168	82.6685	65.998	75.3151	69.1508	Down Regulated
ENSG00000231300	ENSG00000231300.1	EZH2P1	35599732	35600022	-1	mRNA	enhancer of zeste 2 polycomb repressive complex 2 subunit pseudogene 1 [Source:HGNC Symbol;Acc:HGNC:39918]	33.9582	-1.19635	0.257185	1.76e-07	3.4e-05	90	39	58	34	22	14	23	17	49.636	41.0753	59.5975	33.7171	22.7338	14.4371	20.3794	17.5457	Down Regulated
ENSG00000136492	ENSG00000136492.8	BRIP1	61679139	61863559	-1	mRNA	BRCA1 interacting helicase 1 [Source:HGNC Symbol;Acc:HGNC:20473]	988.357	-0.60261	0.129256	1.79e-07	3.44e-05	2258	1266	1625	880	819	733	890	844	1245.31	1333.37	1669.76	872.678	846.319	755.883	788.593	871.094	Down Regulated
ENSG00000136824	ENSG00000136824.19	SMC2	104094260	104141419	1	mRNA	structural maintenance of chromosomes 2 [Source:HGNC Symbol;Acc:HGNC:14011]	1693.35	-0.602502	0.129371	1.84e-07	3.5e-05	4107	2070	2691	1364	1334	1259	1452	1447	2265.06	2180.15	2765.12	1352.65	1378.5	1298.3	1286.56	1493.45	Down Regulated
ENSG00000140199	ENSG00000140199.11	SLC12A6	34229784	34338060	-1	mRNA	solute carrier family 12 member 6 [Source:HGNC Symbol;Acc:HGNC:10914]	3634.17	0.420013	0.0890911	1.88e-07	3.53e-05	4090	3038	2808	4063	4155	4148	4633	4083	2255.68	3199.66	2885.34	4029.2	4293.6	4277.49	4105.12	4214.07	Up Regulated
ENSG00000138092	ENSG00000138092.11	CENPO	24793136	24822376	1	mRNA	centromere protein O [Source:HGNC Symbol;Acc:HGNC:28152]	472.212	-0.533893	0.114438	1.92e-07	3.56e-05	874	466	640	325	318	298	345	357	482.021	490.797	657.628	322.296	328.607	307.303	305.691	368.46	Down Regulated
ENSG00000124098	ENSG00000124098.10	FAM210B	56358974	56368663	1	mRNA	family with sequence similarity 210 member B [Source:HGNC Symbol;Acc:HGNC:16102]	735.914	0.38655	0.0818007	1.93e-07	3.56e-05	1125	694	622	981	933	947	1141	952	620.45	730.93	639.132	972.838	964.122	976.564	1010.99	982.561	Up Regulated
ENSG00000171320	ENSG00000171320.14	ESCO2	27771949	27812640	1	mRNA	establishment of sister chromatid cohesion N-acetyltransferase 2 [Source:HGNC Symbol;Acc:HGNC:27230]	1368.99	-0.754104	0.163278	1.96e-07	3.59e-05	3525	1888	2650	1268	1098	969	1270	1196	1944.08	1988.47	2722.99	1257.45	1134.63	999.251	1125.3	1234.39	Down Regulated
ENSG00000132646	ENSG00000132646.11	PCNA	5114953	5126626	-1	mRNA	proliferating cell nuclear antigen [Source:HGNC Symbol;Acc:HGNC:8729]	1024.03	-0.531968	0.114239	2.03e-07	3.68e-05	2904	1270	1586	1001	863	854	1068	990	1601.59	1337.58	1629.68	992.672	891.787	880.66	946.312	1021.78	Down Regulated
ENSG00000109685	ENSG00000109685.18	NSD2	1871393	1982207	1	mRNA	nuclear receptor binding SET domain protein 2 [Source:HGNC Symbol;Acc:HGNC:12766]	3584.63	-0.426679	0.0910133	2.11e-07	3.79e-05	5957	3134	4013	2534	2279	2229	2699	2497	3285.35	3300.77	4123.53	2512.92	2355.02	2298.59	2391.48	2577.16	Down Regulated
ENSG00000197061	ENSG00000197061.4	H4C3	26103933	26104337	1	mRNA	H4 clustered histone 3 [Source:HGNC Symbol;Acc:HGNC:4787]	1120.5	-0.832336	0.181244	2.13e-07	3.79e-05	3025	2010	2461	1208	954	977	1101	1017	1668.32	2116.96	2528.78	1197.95	985.822	1007.5	975.552	1049.65	Down Regulated
ENSG00000156535	ENSG00000156535.15	CD109	73695785	73828316	1	mRNA	CD109 molecule [Source:HGNC Symbol;Acc:HGNC:21685]	7529.6	0.578786	0.125016	2.15e-07	3.8e-05	8519	5845	5874	10687	10441	9969	11801	10529	4698.32	6156.03	6035.79	10598.1	10789.3	10280.2	10456.4	10867	Up Regulated
ENSG00000139734	ENSG00000139734.18	DIAPH3	59665583	60163928	-1	mRNA	diaphanous related formin 3 [Source:HGNC Symbol;Acc:HGNC:15480]	526.102	-0.625013	0.136064	2.42e-07	4.24e-05	999	546	762	378	371	323	365	377	550.96	575.054	782.988	374.855	383.375	333.084	323.412	389.102	Down Regulated
ENSG00000175029	ENSG00000175029.17	CTBP2	124984317	125161170	-1	mRNA	C-terminal binding protein 2 [Source:HGNC Symbol;Acc:HGNC:2495]	534.637	-0.347691	0.0739527	2.62e-07	4.55e-05	718	369	331	354	276	290	330	261	395.985	388.636	340.117	351.055	285.206	299.053	292.4	269.379	Down Regulated
ENSG00000152495	ENSG00000152495.11	CAMK4	111223653	111494886	1	mRNA	calcium/calmodulin dependent protein kinase IV [Source:HGNC Symbol;Acc:HGNC:1464]	268.268	-0.575195	0.125153	2.69e-07	4.61e-05	922	436	493	291	278	289	299	290	508.493	459.201	506.579	288.579	287.273	298.022	264.932	299.309	Down Regulated
ENSG00000054793	ENSG00000054793.13	ATP9A	51596514	51768390	-1	mRNA	ATPase phospholipid transporting 9A (putative) [Source:HGNC Symbol;Acc:HGNC:13540]	3580.74	0.589051	0.128665	2.7e-07	4.61e-05	3104	2654	2331	4427	4272	4451	4793	4166	1711.89	2795.23	2395.2	4390.17	4414.5	4589.95	4246.89	4299.74	Up Regulated
ENSG00000101773	ENSG00000101773.19	RBBP8	22798261	23026488	1	mRNA	RB binding protein 8, endonuclease [Source:HGNC Symbol;Acc:HGNC:9891]	585.219	-0.623755	0.136613	2.8e-07	4.72e-05	1751	808	999	586	534	469	607	555	965.696	850.996	1026.52	581.125	551.812	483.641	537.838	572.816	Down Regulated
ENSG00000249992	ENSG00000249992.1	TMEM158	45224466	45226287	-1	mRNA	transmembrane protein 158 [Source:HGNC Symbol;Acc:HGNC:30293]	515.217	0.82136	0.181398	2.81e-07	4.72e-05	314	338	211	462	549	561	648	487	173.175	355.986	216.812	458.156	567.313	578.513	574.167	502.634	Up Regulated
ENSG00000273983	ENSG00000273983.1	H3C8	26270918	26271413	-1	mRNA	H3 clustered histone 8 [Source:HGNC Symbol;Acc:HGNC:4772]	902.144	-1.23676	0.274482	2.87e-07	4.77e-05	1302	774	982	351	259	277	321	290	718.068	815.187	1009.05	348.08	267.639	285.647	284.425	299.309	Down Regulated
ENSG00000145545	ENSG00000145545.12	SRD5A1	6633427	6674386	1	mRNA	steroid 5 alpha-reductase 1 [Source:HGNC Symbol;Acc:HGNC:11284]	1038.3	0.41095	0.0889707	3e-07	4.95e-05	1393	1022	834	1244	1358	1346	1413	1247	768.255	1076.38	856.971	1233.65	1403.3	1388.02	1252	1287.03	Up Regulated
ENSG00000116830	ENSG00000116830.12	TTF2	117060326	117107453	1	mRNA	transcription termination factor 2 [Source:HGNC Symbol;Acc:HGNC:12398]	1579.69	-0.46883	0.102159	3.08e-07	5.05e-05	3084	1872	2183	1365	1210	1192	1536	1235	1700.86	1971.61	2243.13	1353.64	1250.36	1229.21	1360.99	1274.65	Down Regulated
ENSG00000180113	ENSG00000180113.16	TDRD6	46687875	46704319	1	mRNA	tudor domain containing 6 [Source:HGNC Symbol;Acc:HGNC:21339]	183.264	0.854145	0.189782	3.11e-07	5.06e-05	178	114	133	321	330	268	352	332	98.169	120.066	136.663	318.329	341.008	276.366	311.893	342.658	Up Regulated
ENSG00000146072	ENSG00000146072.6	TNFRSF21	47231532	47309905	-1	mRNA	TNF receptor superfamily member 21 [Source:HGNC Symbol;Acc:HGNC:13469]	2941.32	0.399128	0.0865142	3.22e-07	5.18e-05	3904	2957	2690	3649	3877	3818	4320	3777	2153.1	3114.35	2764.09	3618.64	4006.32	3937.19	3827.78	3898.25	Up Regulated
ENSG00000000460	ENSG00000000460.17	C1orf112	169662007	169854080	1	mRNA	chromosome 1 open reading frame 112 [Source:HGNC Symbol;Acc:HGNC:25565]	392.372	-0.512484	0.112241	3.25e-07	5.18e-05	940	429	545	352	311	299	361	323	518.421	451.828	560.011	349.071	321.374	308.334	319.868	333.369	Down Regulated
ENSG00000186638	ENSG00000186638.16	KIF24	34252380	34329268	-1	mRNA	kinesin family member 24 [Source:HGNC Symbol;Acc:HGNC:19916]	585.833	-0.435198	0.0949436	3.27e-07	5.18e-05	1023	544	688	457	379	406	461	425	564.196	572.948	706.95	453.198	391.642	418.675	408.474	438.643	Down Regulated
ENSG00000170873	ENSG00000170873.18	MTSS1	124550784	124728473	-1	mRNA	MTSS I-BAR domain containing 1 [Source:HGNC Symbol;Acc:HGNC:20443]	5189.83	0.576992	0.127355	3.42e-07	5.39e-05	3026	2573	1891	2877	3421	3663	3986	3194	1668.87	2709.92	1943.09	2853.06	3535.11	3777.35	3531.84	3296.53	Up Regulated
ENSG00000111554	ENSG00000111554.14	MDM1	68272443	68332381	-1	mRNA	Mdm1 nuclear protein [Source:HGNC Symbol;Acc:HGNC:29917]	293.084	-0.546973	0.120602	3.57e-07	5.57e-05	797	380	451	261	251	251	284	261	439.554	400.221	463.422	258.828	259.372	258.836	251.641	269.379	Down Regulated
ENSG00000158373	ENSG00000158373.8	H2BC5	26158122	26171349	1	mRNA	H2B clustered histone 5 [Source:HGNC Symbol;Acc:HGNC:4747]	1248	-0.96381	0.215768	3.64e-07	5.6e-05	3169	2085	2457	1000	799	875	1044	921	1747.74	2195.95	2524.67	991.68	825.652	902.316	925.047	950.566	Down Regulated
ENSG00000106399	ENSG00000106399.11	RPA3	7636518	7718607	-1	mRNA	replication protein A3 [Source:HGNC Symbol;Acc:HGNC:10291]	344.87	-0.540431	0.119303	3.64e-07	5.6e-05	904	468	533	414	290	339	364	318	498.566	492.904	547.681	410.556	299.673	349.583	322.526	328.208	Down Regulated
ENSG00000094804	ENSG00000094804.11	CDC6	40287879	40304657	1	mRNA	cell division cycle 6 [Source:HGNC Symbol;Acc:HGNC:1744]	1135.6	-0.558684	0.12363	3.74e-07	5.71e-05	3209	1384	1826	1024	1046	876	1100	1034	1769.8	1457.65	1876.29	1015.48	1080.89	903.347	974.666	1067.19	Down Regulated
ENSG00000147536	ENSG00000147536.12	GINS4	41529218	41545030	1	mRNA	GINS complex subunit 4 [Source:HGNC Symbol;Acc:HGNC:28226]	604.065	-0.594125	0.132101	4e-07	6.07e-05	1677	628	848	510	427	450	535	505	924.884	661.418	871.357	505.757	441.243	464.048	474.042	521.211	Down Regulated
ENSG00000178150	ENSG00000178150.10	ZNF114	48270081	48287608	1	mRNA	zinc finger protein 114 [Source:HGNC Symbol;Acc:HGNC:12894]	75.5531	-0.68253	0.154314	4.05e-07	6.09e-05	172	96	100	80	64	43	56	63	94.8599	101.108	102.754	79.3344	66.1348	44.3424	49.6194	65.0224	Down Regulated
ENSG00000176208	ENSG00000176208.9	ATAD5	30831966	30895869	1	mRNA	ATPase family AAA domain containing 5 [Source:HGNC Symbol;Acc:HGNC:25752]	1116.72	-0.438624	0.0966073	4.16e-07	6.2e-05	2564	1225	1551	1050	970	884	1055	968	1414.07	1290.19	1593.72	1041.26	1002.36	911.597	934.793	999.074	Down Regulated
ENSG00000065328	ENSG00000065328.16	MCM10	13161558	13211110	1	mRNA	minichromosome maintenance 10 replication initiation factor [Source:HGNC Symbol;Acc:HGNC:18043]	608.772	-0.602763	0.134383	4.2e-07	6.2e-05	1206	504	716	371	308	329	448	396	665.123	530.819	735.721	367.913	318.274	339.271	396.955	408.712	Down Regulated
ENSG00000090863	ENSG00000090863.11	GLG1	74447427	74607144	-1	mRNA	golgi glycoprotein 1 [Source:HGNC Symbol;Acc:HGNC:4316]	4171.44	0.244442	0.0519227	4.22e-07	6.2e-05	6122	3270	3366	3921	4108	4146	4704	4132	3376.35	3444.01	3458.71	3888.38	4245.03	4275.43	4168.03	4264.64	Up Regulated
ENSG00000273802	ENSG00000273802.2	H2BC8	26216200	26216688	-1	mRNA	H2B clustered histone 8 [Source:HGNC Symbol;Acc:HGNC:4746]	1454.93	-0.935151	0.210919	4.27e-07	6.24e-05	3118	2196	2592	1061	887	914	1114	945	1719.61	2312.86	2663.39	1052.17	916.587	942.534	987.071	975.336	Down Regulated
ENSG00000074266	ENSG00000074266.20	EED	86244753	86278813	1	mRNA	embryonic ectoderm development [Source:HGNC Symbol;Acc:HGNC:3188]	470.657	-0.43679	0.0962588	4.35e-07	6.31e-05	1133	472	579	412	382	358	437	377	624.862	497.116	594.948	408.572	394.742	369.176	387.208	389.102	Down Regulated
ENSG00000163508	ENSG00000163508.12	EOMES	27715949	27722711	-1	mRNA	eomesodermin [Source:HGNC Symbol;Acc:HGNC:3372]	111.732	-0.779753	0.175351	4.44e-07	6.39e-05	205	143	152	60	67	67	85	49	113.06	150.609	156.187	59.5008	69.2349	69.0916	75.3151	50.573	Down Regulated
ENSG00000119714	ENSG00000119714.11	GPR68	91232532	91253925	-1	mRNA	G protein-coupled receptor 68 [Source:HGNC Symbol;Acc:HGNC:4519]	531.124	0.867798	0.196379	4.61e-07	6.6e-05	356	265	201	485	520	572	652	512	196.338	279.101	206.536	480.965	537.345	589.857	577.711	528.436	Up Regulated
ENSG00000144395	ENSG00000144395.18	CCDC150	196639554	196763490	1	mRNA	coiled-coil domain containing 150 [Source:HGNC Symbol;Acc:HGNC:26834]	186.594	-0.6267	0.140815	4.78e-07	6.74e-05	391	188	294	142	150	111	144	133	215.641	198.004	302.098	140.819	155.003	114.465	127.593	137.27	Down Regulated
ENSG00000143797	ENSG00000143797.12	MBOAT2	8852690	9003709	-1	mRNA	membrane bound O-acyltransferase domain containing 2 [Source:HGNC Symbol;Acc:HGNC:25193]	463.272	-0.496335	0.11059	4.82e-07	6.74e-05	1155	469	597	395	346	333	396	413	636.995	493.957	613.444	391.714	357.541	343.396	350.88	426.258	Down Regulated
ENSG00000189362	ENSG00000189362.12	NEMP2	190504338	190534722	-1	mRNA	nuclear envelope integral membrane protein 2 [Source:HGNC Symbol;Acc:HGNC:33700]	558.047	-0.460132	0.101056	4.86e-07	6.74e-05	1076	448	558	372	366	338	411	332	593.426	471.839	573.369	368.905	378.208	348.552	364.171	342.658	Down Regulated
ENSG00000120254	ENSG00000120254.15	MTHFD1L	150865679	151101887	1	mRNA	methylenetetrahydrofolate dehydrogenase (NADP+ dependent) 1 like [Source:HGNC Symbol;Acc:HGNC:21055]	1359.41	-0.298625	0.0646643	4.87e-07	6.74e-05	2616	1086	1153	961	915	895	1118	919	1442.75	1143.79	1184.76	953.005	945.521	922.94	990.615	948.501	Down Regulated
ENSG00000008083	ENSG00000008083.14	JARID2	15246069	15522042	1	mRNA	jumonji and AT-rich interaction domain containing 2 [Source:HGNC Symbol;Acc:HGNC:6196]	2028.84	0.37155	0.081819	4.88e-07	6.74e-05	1827	1245	1351	1692	1719	1734	1983	1707	1007.61	1311.25	1388.21	1677.92	1776.34	1788.13	1757.06	1761.8	Up Regulated
ENSG00000076382	ENSG00000076382.17	SPAG5	28577565	28599025	-1	mRNA	sperm associated antigen 5 [Source:HGNC Symbol;Acc:HGNC:13452]	1206.67	-0.568149	0.127584	4.95e-07	6.75e-05	1909	1203	1649	799	772	740	851	791	1052.83	1267.02	1694.42	792.352	797.751	763.102	754.037	816.392	Down Regulated
ENSG00000131389	ENSG00000131389.17	SLC6A6	14402576	14489349	1	mRNA	solute carrier family 6 member 6 [Source:HGNC Symbol;Acc:HGNC:11052]	3397.66	0.449027	0.100243	5.37e-07	7.27e-05	5105	2574	2510	4087	4009	4346	4736	4077	2815.46	2710.97	2579.13	4053	4142.73	4481.67	4196.38	4207.88	Up Regulated
ENSG00000113645	ENSG00000113645.14	WWC1	168291645	168472303	1	mRNA	WW and C2 domain containing 1 [Source:HGNC Symbol;Acc:HGNC:29435]	196.383	-0.577184	0.13006	5.53e-07	7.44e-05	292	163	139	130	85	93	109	109	161.041	171.674	142.829	128.918	87.8353	95.9033	96.5806	112.499	Down Regulated
ENSG00000035862	ENSG00000035862.12	TIMP2	78852977	78925387	-1	mRNA	TIMP metallopeptidase inhibitor 2 [Source:HGNC Symbol;Acc:HGNC:11821]	4044.32	0.295437	0.0644838	5.66e-07	7.55e-05	5614	3102	2908	3904	3826	3834	4531	4396	3096.18	3267.07	2988.1	3871.52	3953.62	3953.69	4014.74	4537.12	Up Regulated
ENSG00000109158	ENSG00000109158.11	GABRA4	46918900	46993581	-1	mRNA	gamma-aminobutyric acid type A receptor subunit alpha4 [Source:HGNC Symbol;Acc:HGNC:4078]	227.106	-0.905743	0.207328	5.69e-07	7.55e-05	422	446	474	163	132	172	175	203	232.738	469.733	487.056	161.644	136.403	177.37	155.061	209.517	Down Regulated
ENSG00000189057	ENSG00000189057.11	FAM111B	59107185	59127412	1	mRNA	FAM111 trypsin like peptidase B [Source:HGNC Symbol;Acc:HGNC:24200]	872.776	-0.776615	0.177458	5.95e-07	7.85e-05	3161	1343	1890	909	786	711	965	907	1743.33	1414.46	1942.06	901.437	812.218	733.196	855.048	936.116	Down Regulated
ENSG00000175857	ENSG00000175857.8	GAPT	58491435	58497090	1	mRNA	GRB2 binding adaptor protein, transmembrane [Source:HGNC Symbol;Acc:HGNC:26588]	1121.42	-0.690305	0.157448	6.09e-07	7.98e-05	5293	1925	2039	1137	1103	1162	1431	1209	2919.15	2027.43	2095.16	1127.54	1139.79	1198.28	1267.95	1247.81	Down Regulated
ENSG00000160191	ENSG00000160191.18	PDE9A	42653621	42775509	1	mRNA	phosphodiesterase 9A [Source:HGNC Symbol;Acc:HGNC:8795]	28.1233	1.16712	0.268192	6.27e-07	8.16e-05	39	20	13	37	52	59	75	41	21.5089	21.0643	13.3581	36.6922	53.7345	60.8419	66.4545	42.3162	Up Regulated
ENSG00000142856	ENSG00000142856.16	ITGB3BP	63440770	63593721	-1	mRNA	integrin subunit beta 3 binding protein [Source:HGNC Symbol;Acc:HGNC:6157]	375.237	-0.591901	0.13474	6.43e-07	8.27e-05	859	421	574	308	291	251	343	287	473.748	443.403	589.81	305.437	300.707	258.836	303.919	296.213	Down Regulated
ENSG00000155760	ENSG00000155760.2	FZD7	202033855	202038441	1	mRNA	frizzled class receptor 7 [Source:HGNC Symbol;Acc:HGNC:4045]	615.432	0.642903	0.146979	6.43e-07	8.27e-05	652	739	507	959	1041	1082	1167	969	359.585	778.324	520.965	951.021	1075.72	1115.78	1034.03	1000.11	Up Regulated
ENSG00000093009	ENSG00000093009.9	CDC45	19479457	19520612	1	mRNA	cell division cycle 45 [Source:HGNC Symbol;Acc:HGNC:1739]	371.629	-0.703018	0.160962	6.59e-07	8.36e-05	1142	453	546	302	251	272	322	324	629.826	477.105	561.039	299.487	259.372	280.491	285.311	334.401	Down Regulated
ENSG00000272899	ENSG00000272899.4	ATP6V1FNB	128866330	128872047	1	mRNA	ATP6V1F neighbor [Source:HGNC Symbol;Acc:HGNC:52392]	177.653	0.848338	0.195835	6.63e-07	8.36e-05	139	117	130	255	276	276	306	255	76.6601	123.226	133.581	252.878	285.206	284.616	271.134	263.186	Up Regulated
ENSG00000166845	ENSG00000166845.15	C18orf54	54357906	54385218	1	mRNA	chromosome 18 open reading frame 54 [Source:HGNC Symbol;Acc:HGNC:13796]	251.189	-0.638719	0.144668	6.63e-07	8.36e-05	452	251	254	164	158	109	160	159	249.283	264.356	260.996	162.636	163.27	112.403	141.77	164.104	Down Regulated
ENSG00000168883	ENSG00000168883.20	USP39	85602856	85649283	1	mRNA	ubiquitin specific peptidase 39 [Source:HGNC Symbol;Acc:HGNC:20071]	981.352	-0.251681	0.0547515	6.99e-07	8.73e-05	2173	1068	1143	971	877	879	1094	902	1198.43	1124.83	1174.48	962.921	906.254	906.441	969.35	930.956	Down Regulated
ENSG00000138449	ENSG00000138449.10	SLC40A1	189560590	189583758	-1	mRNA	solute carrier family 40 member 1 [Source:HGNC Symbol;Acc:HGNC:10909]	150.668	-0.748917	0.171579	7.01e-07	8.73e-05	595	157	179	126	99	99	145	125	328.149	165.354	183.93	124.952	102.302	102.091	128.479	129.013	Down Regulated
ENSG00000101407	ENSG00000101407.13	TTI1	37983007	38033461	-1	mRNA	TELO2 interacting protein 1 [Source:HGNC Symbol;Acc:HGNC:29029]	1106.29	-0.274003	0.060611	7.05e-07	8.74e-05	2121	1224	1231	1048	946	969	1026	964	1169.76	1289.13	1264.91	1039.28	977.555	999.251	909.098	994.946	Down Regulated
ENSG00000167325	ENSG00000167325.15	RRM1	4094707	4138932	1	mRNA	ribonucleotide reductase catalytic subunit M1 [Source:HGNC Symbol;Acc:HGNC:10451]	2501.88	-0.543724	0.124306	7.36e-07	9.07e-05	6404	3162	4055	2251	2156	1998	2489	2235	3531.88	3330.26	4166.69	2232.27	2227.92	2060.37	2205.4	2306.75	Down Regulated
ENSG00000274641	ENSG00000274641.1	H2BC17	27893425	27893891	1	mRNA	H2B clustered histone 17 [Source:HGNC Symbol;Acc:HGNC:4758]	1015.89	-1.07699	0.251152	7.88e-07	9.59e-05	1806	1318	1728	647	468	482	619	570	996.029	1388.13	1775.6	641.617	483.611	497.047	548.471	588.298	Down Regulated
ENSG00000127589	ENSG00000127589.4	TUBBP1	30351873	30353518	1	mRNA	tubulin beta pseudogene 1 [Source:HGNC Symbol;Acc:HGNC:12414]	1075.86	-0.657841	0.151983	7.97e-07	9.64e-05	1770	966	1233	627	571	581	612	609	976.175	1017.4	1266.96	621.783	590.047	599.138	542.269	628.55	Down Regulated
ENSG00000132002	ENSG00000132002.8	DNAJB1	14514769	14560391	-1	mRNA	DnaJ heat shock protein family (Hsp40) member B1 [Source:HGNC Symbol;Acc:HGNC:5270]	1629.22	-0.468068	0.106771	8.04e-07	9.66e-05	3186	1535	1462	1133	1042	1055	1116	1037	1757.11	1616.68	1502.27	1123.57	1076.76	1087.94	988.843	1070.29	Down Regulated
ENSG00000156970	ENSG00000156970.12	BUB1B	40161023	40221123	1	mRNA	BUB1 mitotic checkpoint serine/threonine kinase B [Source:HGNC Symbol;Acc:HGNC:1149]	924.529	-0.62409	0.144531	8.59e-07	0.000102653	1824	1104	1412	704	661	585	750	717	1005.96	1162.75	1450.89	698.143	683.049	603.263	664.545	740.017	Down Regulated
ENSG00000092470	ENSG00000092470.12	WDR76	43826980	43868412	1	mRNA	WD repeat domain 76 [Source:HGNC Symbol;Acc:HGNC:25773]	904.978	-0.619141	0.143441	8.77e-07	0.000104116	2836	1157	1629	815	826	724	910	864	1564.09	1218.57	1673.87	808.219	853.552	746.602	806.315	891.736	Down Regulated
ENSG00000139112	ENSG00000139112.11	GABARAPL1	10212458	10223128	1	mRNA	GABA type A receptor associated protein like 1 [Source:HGNC Symbol;Acc:HGNC:4068]	760.766	0.401813	0.0916104	9.14e-07	0.00010797	1421	847	822	1208	1215	1251	1372	1218	783.697	892.071	844.641	1197.95	1255.53	1290.05	1215.67	1257.1	Up Regulated
ENSG00000077152	ENSG00000077152.10	UBE2T	202331657	202341980	-1	mRNA	ubiquitin conjugating enzyme E2 T [Source:HGNC Symbol;Acc:HGNC:25009]	383.218	-0.625513	0.145349	9.23e-07	0.000108342	888	478	574	295	284	259	335	301	489.742	503.436	589.81	292.546	293.473	267.086	296.83	310.663	Down Regulated
ENSG00000162892	ENSG00000162892.15	IL24	206897443	206904139	1	mRNA	interleukin 24 [Source:HGNC Symbol;Acc:HGNC:11346]	22.2692	1.31928	0.31343	9.32e-07	0.000108761	6	18	14	24	46	31	47	31	3.30907	18.9578	14.3856	23.8003	47.5344	31.9678	41.6448	31.9952	Up Regulated
ENSG00000186480	ENSG00000186480.13	INSIG1	155297776	155310235	1	mRNA	insulin induced gene 1 [Source:HGNC Symbol;Acc:HGNC:6083]	3960.91	0.628218	0.14623	9.41e-07	0.000109237	3351	2839	2774	4469	4564	5005	5529	4574	1848.11	2990.07	2850.41	4431.82	4716.24	5161.25	4899.03	4720.83	Up Regulated
ENSG00000153823	ENSG00000153823.18	PID1	228850526	229271287	-1	mRNA	phosphotyrosine interaction domain containing 1 [Source:HGNC Symbol;Acc:HGNC:26084]	51.3722	0.804102	0.188363	9.57e-07	0.000110443	93	44	48	78	91	89	114	121	51.2905	46.3414	49.3221	77.351	94.0354	91.7784	101.011	124.884	Up Regulated
ENSG00000051180	ENSG00000051180.17	RAD51	40694774	40732340	1	mRNA	RAD51 recombinase [Source:HGNC Symbol;Acc:HGNC:9817]	306.978	-0.599492	0.139564	9.92e-07	0.000113876	772	341	469	272	213	207	283	284	425.767	359.146	481.918	269.737	220.105	213.462	250.755	293.117	Down Regulated
ENSG00000107798	ENSG00000107798.18	LIPA	89213569	89414557	-1	mRNA	lipase A, lysosomal acid type [Source:HGNC Symbol;Acc:HGNC:6617]	16880	0.550083	0.12812	1.04e-06	0.000118614	18024	14037	13011	21207	20996	21440	25544	22492	9940.44	14783.9	13369.4	21030.6	21696.4	22109.3	22633.5	23214	Up Regulated
ENSG00000112029	ENSG00000112029.10	FBXO5	152970519	152983579	-1	mRNA	F-box protein 5 [Source:HGNC Symbol;Acc:HGNC:13584]	774.597	-0.670142	0.157131	1.05e-06	0.000118614	1943	1092	1425	702	622	579	752	706	1071.59	1150.11	1464.25	696.159	642.748	597.075	666.317	728.664	Down Regulated
ENSG00000163359	ENSG00000163359.15	COL6A3	237324003	237414328	-1	mRNA	collagen type VI alpha 3 chain [Source:HGNC Symbol;Acc:HGNC:2213]	62.4706	1.08481	0.259495	1.07e-06	0.000121014	16	19	19	33	33	49	45	50	8.82418	20.011	19.5233	32.7254	34.1008	50.5297	39.8727	51.6051	Up Regulated
ENSG00000077684	ENSG00000077684.16	JADE1	128809700	128875224	1	mRNA	jade family PHD finger 1 [Source:HGNC Symbol;Acc:HGNC:30027]	874.635	-0.389359	0.0893098	1.11e-06	0.000124239	1696	720	822	635	631	526	667	570	935.363	758.313	844.641	629.717	652.048	542.421	591.002	588.298	Down Regulated
ENSG00000116237	ENSG00000116237.16	ICMT	6221193	6235972	-1	mRNA	isoprenylcysteine carboxyl methyltransferase [Source:HGNC Symbol;Acc:HGNC:5350]	3349.54	-0.361113	0.0825873	1.12e-06	0.000125267	6730	3524	3934	2873	2614	2661	2991	2738	3711.67	3711.52	4042.36	2849.1	2701.19	2744.07	2650.21	2825.89	Down Regulated
ENSG00000168496	ENSG00000168496.4	FEN1	61792911	61797238	1	mRNA	flap structure-specific endonuclease 1 [Source:HGNC Symbol;Acc:HGNC:3650]	1554.97	-0.5599	0.13147	1.2e-06	0.000133614	4002	2024	2536	1339	1231	1287	1537	1407	2207.15	2131.7	2605.85	1327.86	1272.06	1327.18	1361.87	1452.17	Down Regulated
ENSG00000110583	ENSG00000110583.13	NAA40	63938959	63957319	1	mRNA	N-alpha-acetyltransferase 40, NatD catalytic subunit [Source:HGNC Symbol;Acc:HGNC:25845]	995.558	-0.446171	0.103863	1.25e-06	0.000137783	2767	1123	1317	967	845	869	1002	907	1526.03	1182.76	1353.28	958.955	873.186	896.129	887.832	936.116	Down Regulated
ENSG00000164463	ENSG00000164463.12	CREBRF	173056352	173139284	1	mRNA	CREB3 regulatory factor [Source:HGNC Symbol;Acc:HGNC:24050]	1485.54	0.373963	0.0864572	1.31e-06	0.00014221	1953	1203	1330	1631	1736	1739	1939	1684	1077.1	1267.02	1366.63	1617.43	1793.91	1793.29	1718.07	1738.06	Up Regulated
ENSG00000227825	ENSG00000227825.4	SLC9A7P1	98453835	98457145	-1	mRNA	solute carrier family 9 member 7 pseudogene 1 [Source:HGNC Symbol;Acc:HGNC:32679]	335.736	0.587951	0.139299	1.31e-06	0.00014221	364	417	361	572	627	653	635	545	200.75	439.19	370.943	567.241	647.915	673.386	562.648	562.495	Up Regulated
ENSG00000130844	ENSG00000130844.17	ZNF331	53519527	53580269	1	mRNA	zinc finger protein 331 [Source:HGNC Symbol;Acc:HGNC:15489]	226.23	-0.411206	0.0954784	1.32e-06	0.00014221	462	225	301	223	178	162	227	190	254.798	236.973	309.291	221.145	183.937	167.057	201.136	196.099	Down Regulated
ENSG00000148019	ENSG00000148019.13	CEP78	78236062	78279690	1	mRNA	centrosomal protein 78 [Source:HGNC Symbol;Acc:HGNC:25740]	992.794	-0.462047	0.108396	1.39e-06	0.000148683	2805	1371	1728	1002	1104	969	1105	916	1546.99	1443.95	1775.6	993.663	1140.83	999.251	979.096	945.405	Down Regulated
ENSG00000197275	ENSG00000197275.14	RAD54B	94371960	94475115	-1	mRNA	RAD54 homolog B [Source:HGNC Symbol;Acc:HGNC:17228]	76.6095	-0.785417	0.187204	1.44e-06	0.000153634	182	70	110	54	46	39	57	49	100.375	73.7249	113.03	53.5507	47.5344	40.2175	50.5054	50.573	Down Regulated
ENSG00000142230	ENSG00000142230.11	SAE1	47113274	47210636	1	mRNA	SUMO1 activating enzyme subunit 1 [Source:HGNC Symbol;Acc:HGNC:30660]	1681.33	-0.366099	0.0850502	1.5e-06	0.000158295	3607	1836	2124	1610	1444	1414	1616	1423	1989.3	1933.7	2182.5	1596.6	1492.17	1458.14	1431.87	1468.68	Down Regulated
ENSG00000197702	ENSG00000197702.13	PARVA	12377563	12535356	1	mRNA	parvin alpha [Source:HGNC Symbol;Acc:HGNC:14652]	936.629	0.279119	0.0636258	1.51e-06	0.000158424	1294	710	717	974	921	985	1053	953	713.656	747.781	736.749	965.896	951.721	1015.75	933.021	983.593	Up Regulated
ENSG00000159212	ENSG00000159212.12	CLIC6	34668994	34718227	1	mRNA	chloride intracellular channel 6 [Source:HGNC Symbol;Acc:HGNC:2065]	97.6913	0.814385	0.196566	1.53e-06	0.000159881	99	76	82	159	152	181	209	157	54.5996	80.0442	84.2586	157.677	157.07	186.651	185.187	162.04	Up Regulated
ENSG00000161888	ENSG00000161888.11	SPC24	11131520	11155807	-1	mRNA	SPC24 component of NDC80 kinetochore complex [Source:HGNC Symbol;Acc:HGNC:26913]	696.594	-0.846838	0.204056	1.54e-06	0.000159881	1221	820	1069	458	425	373	427	403	673.395	863.635	1098.44	454.189	439.177	384.644	378.348	415.937	Down Regulated
ENSG00000156398	ENSG00000156398.13	SFXN2	102714538	102743492	1	mRNA	sideroflexin 2 [Source:HGNC Symbol;Acc:HGNC:16086]	212.264	-0.559349	0.132732	1.54e-06	0.000159881	396	175	192	120	111	114	120	133	218.398	184.312	197.288	119.002	114.703	117.559	106.327	137.27	Down Regulated
ENSG00000174080	ENSG00000174080.11	CTSF	66563464	66568879	-1	mRNA	cathepsin F [Source:HGNC Symbol;Acc:HGNC:2531]	103.766	0.927664	0.223678	1.57e-06	0.000161817	68	62	55	111	144	127	149	121	37.5028	65.2992	56.5149	110.076	148.803	130.965	132.023	124.884	Up Regulated
ENSG00000137809	ENSG00000137809.17	ITGA11	68296532	68432163	-1	mRNA	integrin subunit alpha 11 [Source:HGNC Symbol;Acc:HGNC:6136]	196.795	0.53406	0.127213	1.58e-06	0.000161817	206	121	123	159	203	183	196	204	113.611	127.439	126.388	157.677	209.771	188.713	173.668	210.549	Up Regulated
ENSG00000149554	ENSG00000149554.12	CHEK1	125625163	125676255	1	mRNA	checkpoint kinase 1 [Source:HGNC Symbol;Acc:HGNC:1925]	740.409	-0.485514	0.115255	1.67e-06	0.00017051	1711	725	971	566	558	529	658	542	943.636	763.579	997.745	561.291	576.613	545.514	583.028	559.399	Down Regulated
ENSG00000131470	ENSG00000131470.14	PSMC3IP	42572310	42577831	-1	mRNA	PSMC3 interacting protein [Source:HGNC Symbol;Acc:HGNC:17928]	106.53	-0.642343	0.154498	1.71e-06	0.000174098	347	147	190	118	93	91	111	114	191.374	154.822	195.233	117.018	96.1022	93.8409	98.3527	117.66	Down Regulated
ENSG00000277224	ENSG00000277224.2	H2BC7	26199516	26199988	1	mRNA	H2B clustered histone 7 [Source:HGNC Symbol;Acc:HGNC:4752]	811.266	-0.944721	0.229694	1.74e-06	0.000175429	1152	983	1197	491	343	392	465	458	635.341	1035.31	1229.97	486.915	354.441	404.238	412.018	472.703	Down Regulated
ENSG00000286169	ENSG00000286169.1		NA	NA	NA	mRNA		3467.69	0.421432	0.0996019	1.74e-06	0.000175429	3449	1820	1784	2646	2775	2739	3238	2730	1902.16	1916.85	1833.14	2623.99	2867.56	2824.51	2869.06	2817.64	Up Regulated
ENSG00000160213	ENSG00000160213.7	CSTB	43772511	43776330	-1	mRNA	cystatin B [Source:HGNC Symbol;Acc:HGNC:2482]	3071.5	0.404143	0.0954331	1.79e-06	0.000179409	3884	2694	2453	3888	3383	3587	4674	3930	2142.07	2837.36	2520.56	3855.65	3495.85	3698.98	4141.44	4056.16	Up Regulated
ENSG00000116729	ENSG00000116729.14	WLS	68098473	68233120	-1	mRNA	Wnt ligand secretion mediator [Source:HGNC Symbol;Acc:HGNC:30238]	251.033	-0.47884	0.114491	1.81e-06	0.00017992	828	425	488	291	277	271	340	302	456.651	447.615	501.441	288.579	286.24	279.46	301.26	311.695	Down Regulated
ENSG00000134207	ENSG00000134207.16	SYT6	114089291	114153880	-1	mRNA	synaptotagmin 6 [Source:HGNC Symbol;Acc:HGNC:18638]	13.281	-1.72698	0.415467	1.83e-06	0.000181691	110	17	21	14	6	11	8	7	60.6662	17.9046	21.5784	13.8835	6.20014	11.3434	7.08848	7.22471	Down Regulated
ENSG00000164045	ENSG00000164045.11	CDC25A	48157146	48188417	-1	mRNA	cell division cycle 25A [Source:HGNC Symbol;Acc:HGNC:1725]	600.544	-0.633065	0.153363	1.97e-06	0.00019443	1721	750	887	454	438	422	547	527	949.151	789.91	911.431	450.223	452.61	435.174	484.675	543.918	Down Regulated
ENSG00000107863	ENSG00000107863.18	ARHGAP21	24583609	24723887	-1	mRNA	Rho GTPase activating protein 21 [Source:HGNC Symbol;Acc:HGNC:23725]	1502.7	-0.327406	0.0767397	2.08e-06	0.000202436	1757	892	975	752	687	688	809	704	969.005	939.466	1001.86	745.743	709.916	709.478	716.823	726.6	Down Regulated
ENSG00000106819	ENSG00000106819.12	ASPN	92456205	92482506	-1	mRNA	asporin [Source:HGNC Symbol;Acc:HGNC:14872]	158.153	-0.882424	0.215825	2.08e-06	0.000202436	306	103	169	88	68	46	78	86	168.762	108.481	173.655	87.2678	70.2682	47.436	69.1127	88.7607	Down Regulated
ENSG00000047056	ENSG00000047056.15	WDR37	1049538	1132384	1	mRNA	WD repeat domain 37 [Source:HGNC Symbol;Acc:HGNC:31406]	1451.54	0.308949	0.0722634	2.08e-06	0.000202436	1285	973	961	1081	1172	1136	1362	1124	708.692	1024.78	987.469	1072.01	1211.09	1171.46	1206.81	1160.08	Up Regulated
ENSG00000278463	ENSG00000278463.1	H2AC4	26033092	26033618	-1	mRNA	H2A clustered histone 4 [Source:HGNC Symbol;Acc:HGNC:4734]	341.625	-1.19334	0.294288	2.1e-06	0.000202675	866	576	696	222	177	192	248	201	477.609	606.651	715.17	220.153	182.904	197.994	219.743	207.452	Down Regulated
ENSG00000126775	ENSG00000126775.8	ATG14	55366391	55411830	-1	mRNA	autophagy related 14 [Source:HGNC Symbol;Acc:HGNC:19962]	805.484	0.312495	0.0732197	2.2e-06	0.000211889	1151	695	656	911	926	864	1092	862	634.789	731.983	674.069	903.421	956.888	890.973	967.578	889.672	Up Regulated
ENSG00000123219	ENSG00000123219.13	CENPK	65517766	65563168	-1	mRNA	centromere protein K [Source:HGNC Symbol;Acc:HGNC:29479]	430.006	-0.659636	0.161509	2.31e-06	0.000221019	848	366	564	245	246	239	266	269	467.682	385.476	579.535	242.962	254.206	246.461	235.692	277.635	Down Regulated
ENSG00000124635	ENSG00000124635.8	H2BC11	27125897	27132795	-1	mRNA	H2B clustered histone 11 [Source:HGNC Symbol;Acc:HGNC:4761]	1137.17	-1.0851	0.268894	2.32e-06	0.000221019	2407	1857	2264	866	643	661	791	741	1327.49	1955.82	2326.36	858.795	664.448	681.635	700.874	764.787	Down Regulated
ENSG00000100629	ENSG00000100629.17	CEP128	80476983	80959517	-1	mRNA	centrosomal protein 128 [Source:HGNC Symbol;Acc:HGNC:20359]	466.62	-0.467609	0.112976	2.38e-06	0.000225827	787	385	469	290	245	293	320	282	434.039	405.487	481.918	287.587	253.172	302.147	283.539	291.053	Down Regulated
ENSG00000276043	ENSG00000276043.5	UHRF1	4903080	4962154	1	mRNA	ubiquitin like with PHD and ring finger domains 1 [Source:HGNC Symbol;Acc:HGNC:12556]	886.966	-0.531118	0.129522	2.5e-06	0.00023585	2194	980	1132	634	594	650	792	687	1210.02	1032.15	1163.18	628.725	613.814	670.292	701.76	709.054	Down Regulated
ENSG00000278637	ENSG00000278637.1	H4C1	26021649	26022050	1	mRNA	H4 clustered histone 1 [Source:HGNC Symbol;Acc:HGNC:4781]	593.162	-1.09837	0.273463	2.51e-06	0.000235907	1126	621	859	268	225	221	306	301	621.002	654.045	882.66	265.77	232.505	227.899	271.134	310.663	Down Regulated
ENSG00000121152	ENSG00000121152.10	NCAPH	96335766	96377091	1	mRNA	non-SMC condensin I complex subunit H [Source:HGNC Symbol;Acc:HGNC:1112]	612.01	-0.620076	0.15263	2.6e-06	0.000243337	1232	654	991	447	427	389	488	471	679.462	688.801	1018.3	443.281	441.243	401.144	432.397	486.12	Down Regulated
ENSG00000117139	ENSG00000117139.17	KDM5B	202724495	202808487	-1	mRNA	lysine demethylase 5B [Source:HGNC Symbol;Acc:HGNC:18039]	2539.33	0.342308	0.0819157	2.81e-06	0.000261374	2588	1601	1532	2225	2172	2145	2462	2203	1427.31	1686.19	1574.2	2206.49	2244.45	2211.96	2181.48	2273.72	Up Regulated
ENSG00000095951	ENSG00000095951.17	HIVEP1	12008762	12164999	1	mRNA	HIVEP zinc finger 1 [Source:HGNC Symbol;Acc:HGNC:4920]	668.618	0.571863	0.140977	2.82e-06	0.000261374	902	393	430	782	777	812	961	778	497.463	413.913	441.844	775.494	802.918	837.349	851.504	802.975	Up Regulated
ENSG00000123374	ENSG00000123374.11	CDK2	55966781	55972789	1	mRNA	cyclin dependent kinase 2 [Source:HGNC Symbol;Acc:HGNC:1771]	772.465	-0.506309	0.124158	2.84e-06	0.000262435	1755	915	995	577	578	565	670	606	967.902	963.69	1022.41	572.199	597.28	582.638	593.66	625.454	Down Regulated
ENSG00000164076	ENSG00000164076.17	CAMKV	49857988	49869935	-1	mRNA	CaM kinase like vesicle associated [Source:HGNC Symbol;Acc:HGNC:28788]	49.6686	-1.34976	0.336153	2.86e-06	0.000263223	353	44	108	25	25	36	36	40	194.683	46.3414	110.975	24.792	25.8339	37.1239	31.8982	41.2841	Down Regulated
ENSG00000164023	ENSG00000164023.14	SGMS2	107824563	107915047	1	mRNA	sphingomyelin synthase 2 [Source:HGNC Symbol;Acc:HGNC:28395]	400.486	-0.706423	0.175621	2.89e-06	0.000264748	1222	435	691	297	264	309	337	345	673.947	458.148	710.033	294.529	272.806	318.646	298.602	356.075	Down Regulated
ENSG00000174442	ENSG00000174442.12	ZWILCH	66504959	66550130	1	mRNA	zwilch kinetochore protein [Source:HGNC Symbol;Acc:HGNC:25468]	481.581	-0.526562	0.129517	2.92e-06	0.000266058	1364	603	730	464	477	371	512	399	752.261	635.087	750.107	460.14	492.911	382.582	453.663	411.809	Down Regulated
ENSG00000182944	ENSG00000182944.17	EWSR1	29268009	29300525	1	mRNA	EWS RNA binding protein 1 [Source:HGNC Symbol;Acc:HGNC:3508]	5842.64	0.195574	0.0446705	2.94e-06	0.000266665	9942	5042	5510	6243	6362	6506	7076	6393	5483.12	5310.3	5661.77	6191.06	6574.21	6709.11	6269.76	6598.23	Up Regulated
ENSG00000146070	ENSG00000146070.16	PLA2G7	46704201	46735693	-1	mRNA	phospholipase A2 group VII [Source:HGNC Symbol;Acc:HGNC:9040]	345.7	0.795288	0.19887	2.96e-06	0.000267473	418	205	270	605	521	561	776	608	230.532	215.909	277.437	599.966	538.379	578.513	687.583	627.518	Up Regulated
ENSG00000115414	ENSG00000115414.19	FN1	215360440	215436073	-1	mRNA	fibronectin 1 [Source:HGNC Symbol;Acc:HGNC:3778]	4848.7	-0.996158	0.250296	2.98e-06	0.000267956	4152	2057	1939	783	745	893	912	833	2289.87	2166.46	1992.41	776.485	769.851	920.878	808.087	859.741	Down Regulated
ENSG00000129484	ENSG00000129484.13	PARP2	20343615	20357904	1	mRNA	poly(ADP-ribose) polymerase 2 [Source:HGNC Symbol;Acc:HGNC:272]	361.474	-0.404712	0.0981568	2.99e-06	0.000267956	909	418	480	339	308	306	392	316	501.324	440.243	493.221	336.18	318.274	315.553	347.336	326.144	Down Regulated
ENSG00000184357	ENSG00000184357.4	H1-5	27866792	27867588	-1	mRNA	H1.5 linker histone, cluster member [Source:HGNC Symbol;Acc:HGNC:4719]	3398.93	-1.1196	0.282014	3.01e-06	0.000268104	9917	6183	7927	2796	2272	2223	2736	2526	5469.34	6512.02	8145.34	2772.74	2347.79	2292.4	2424.26	2607.09	Down Regulated
ENSG00000145604	ENSG00000145604.15	SKP2	36151989	36196849	1	mRNA	S-phase kinase associated protein 2 [Source:HGNC Symbol;Acc:HGNC:10901]	1273.87	-0.36525	0.0881509	3.03e-06	0.000268104	2181	1187	1319	965	885	852	998	909	1202.85	1250.16	1355.33	956.971	914.521	878.598	884.288	938.18	Down Regulated
ENSG00000173334	ENSG00000173334.4	TRIB1	125430358	125438403	1	mRNA	tribbles pseudokinase 1 [Source:HGNC Symbol;Acc:HGNC:16891]	7569.87	0.425063	0.103675	3.04e-06	0.000268104	8169	6186	5693	7390	8059	8851	9300	7478	4505.3	6515.17	5849.81	7328.52	8327.82	9127.31	8240.36	7718.06	Up Regulated
ENSG00000278705	ENSG00000278705.1	H4C2	26026896	26027283	-1	mRNA	H4 clustered histone 2 [Source:HGNC Symbol;Acc:HGNC:4789]	761.3	-1.01064	0.254543	3.09e-06	0.000271123	1517	1049	1276	513	386	417	483	456	836.643	1104.82	1311.15	508.732	398.876	430.018	427.967	470.638	Down Regulated
ENSG00000205856	ENSG00000205856.4	C22orf42	32149006	32159322	-1	mRNA	chromosome 22 open reading frame 42 [Source:HGNC Symbol;Acc:HGNC:27160]	57.5362	1.04757	0.263893	3.1e-06	0.000271123	39	16	23	46	55	54	61	70	21.5089	16.8514	23.6335	45.6173	56.8346	55.6858	54.0497	72.2471	Up Regulated
ENSG00000151012	ENSG00000151012.13	SLC7A11	138164097	138242349	-1	mRNA	solute carrier family 7 member 11 [Source:HGNC Symbol;Acc:HGNC:11059]	2649.65	1.23864	0.313172	3.13e-06	0.000272939	1191	331	406	2504	2384	2374	3042	2456	656.85	348.613	417.183	2483.17	2463.52	2448.11	2695.39	2534.84	Up Regulated
ENSG00000101361	ENSG00000101361.17	NOP56	2652593	2658393	1	mRNA	NOP56 ribonucleoprotein [Source:HGNC Symbol;Acc:HGNC:15911]	1105.94	-0.295894	0.0704136	3.22e-06	0.00027931	2660	1207	1290	1074	974	1007	1131	1040	1467.02	1271.23	1325.53	1065.06	1006.49	1038.44	1002.13	1073.39	Down Regulated
ENSG00000140534	ENSG00000140534.13	TICRR	89575469	89631056	1	mRNA	TOPBP1 interacting checkpoint and replication regulator [Source:HGNC Symbol;Acc:HGNC:28704]	592.282	-0.519891	0.128751	3.27e-06	0.000282553	818	445	624	304	305	293	355	309	451.136	468.68	641.187	301.471	315.174	302.147	314.551	318.919	Down Regulated
ENSG00000226650	ENSG00000226650.5	KIF4B	155013755	155018141	1	mRNA	kinesin family member 4B [Source:HGNC Symbol;Acc:HGNC:6322]	153.371	-0.768508	0.193242	3.28e-06	0.000282553	267	205	231	130	108	96	108	93	147.253	215.909	237.363	128.918	111.603	98.997	95.6945	95.9855	Down Regulated
ENSG00000154920	ENSG00000154920.14	EME1	50373220	50381483	1	mRNA	essential meiotic structure-specific endonuclease 1 [Source:HGNC Symbol;Acc:HGNC:24965]	217.65	-0.441558	0.110467	3.43e-06	0.000293718	450	262	306	185	174	183	193	180	248.18	275.942	314.428	183.461	179.804	188.713	171.01	185.778	Down Regulated
ENSG00000172292	ENSG00000172292.14	CERS6	168456249	168775134	1	mRNA	ceramide synthase 6 [Source:HGNC Symbol;Acc:HGNC:23826]	2786.08	-0.301532	0.0721938	3.45e-06	0.000294659	5224	2689	2894	2186	2099	1999	2502	2141	2881.09	2832.09	2973.71	2167.81	2169.02	2061.41	2216.92	2209.73	Down Regulated
ENSG00000131153	ENSG00000131153.9	GINS2	85676198	85690073	-1	mRNA	GINS complex subunit 2 [Source:HGNC Symbol;Acc:HGNC:24575]	379.299	-0.500761	0.124161	3.49e-06	0.000296522	1178	483	620	424	313	365	392	455	649.68	508.702	637.077	420.472	323.441	376.395	347.336	469.606	Down Regulated
ENSG00000203814	ENSG00000203814.6	H2BC18	149782689	149812373	-1	mRNA	H2B clustered histone 18 [Source:HGNC Symbol;Acc:HGNC:24700]	4076.13	-1.01914	0.258806	3.52e-06	0.000297769	7805	5700	6704	2757	2054	2097	2690	2342	4304.54	6003.31	6888.65	2734.06	2122.51	2162.46	2383.5	2417.18	Down Regulated
ENSG00000136982	ENSG00000136982.6	DSCC1	119833976	119855894	-1	mRNA	DNA replication and sister chromatid cohesion 1 [Source:HGNC Symbol;Acc:HGNC:24453]	321.91	-0.566399	0.14144	3.58e-06	0.000302003	1018	416	536	322	301	276	344	305	561.438	438.137	550.763	319.321	311.04	284.616	304.805	314.791	Down Regulated
ENSG00000165244	ENSG00000165244.7	ZNF367	96385941	96418370	-1	mRNA	zinc finger protein 367 [Source:HGNC Symbol;Acc:HGNC:18320]	942.554	-0.513151	0.127912	3.71e-06	0.000311622	2605	1061	1510	800	789	745	981	833	1436.69	1117.46	1551.59	793.344	815.318	768.258	869.225	859.741	Down Regulated
ENSG00000075131	ENSG00000075131.10	TIPIN	66336191	66386746	-1	mRNA	TIMELESS interacting protein [Source:HGNC Symbol;Acc:HGNC:30750]	319.657	-0.463728	0.114971	3.82e-06	0.00031948	840	323	390	275	282	262	278	230	463.269	340.188	400.742	272.712	291.407	270.179	246.325	237.383	Down Regulated
ENSG00000076003	ENSG00000076003.5	MCM6	135839626	135876443	-1	mRNA	minichromosome maintenance complex component 6 [Source:HGNC Symbol;Acc:HGNC:6949]	1833.27	-0.420291	0.103795	3.86e-06	0.000320253	4955	1667	2129	1485	1374	1386	1686	1538	2732.74	1755.71	2187.64	1472.64	1419.83	1429.27	1493.9	1587.37	Down Regulated
ENSG00000277075	ENSG00000277075.2	H2AC8	26216975	26217483	1	mRNA	H2A clustered histone 8 [Source:HGNC Symbol;Acc:HGNC:4724]	963.219	-0.989764	0.252722	3.86e-06	0.000320253	2277	1751	2190	861	676	677	797	763	1255.79	1844.18	2250.32	853.837	698.549	698.135	706.19	787.494	Down Regulated
ENSG00000132383	ENSG00000132383.11	RPA1	1829702	1900082	1	mRNA	replication protein A1 [Source:HGNC Symbol;Acc:HGNC:10289]	580.712	-0.448006	0.111382	4.04e-06	0.000333527	1318	626	713	536	397	439	553	516	726.892	659.311	732.639	531.541	410.243	452.705	489.991	532.564	Down Regulated
ENSG00000096433	ENSG00000096433.11	ITPR3	33620365	33696574	1	mRNA	inositol 1,4,5-trisphosphate receptor type 3 [Source:HGNC Symbol;Acc:HGNC:6182]	256.013	-0.876406	0.223778	4.08e-06	0.000335229	483	251	251	148	121	106	120	132	266.38	264.356	257.913	146.769	125.036	109.309	106.327	136.237	Down Regulated
ENSG00000071242	ENSG00000071242.12	RPS6KA2	166409364	166906451	-1	mRNA	ribosomal protein S6 kinase A2 [Source:HGNC Symbol;Acc:HGNC:10431]	3929.1	0.517072	0.129786	4.09e-06	0.000335326	3581	2196	2039	3695	3457	3803	4039	3729	1974.96	2312.86	2095.16	3664.26	3572.31	3921.72	3578.8	3848.71	Up Regulated
ENSG00000170734	ENSG00000170734.11	POLH	43576185	43620523	1	mRNA	DNA polymerase eta [Source:HGNC Symbol;Acc:HGNC:9181]	791.794	-0.348184	0.0853321	4.2e-06	0.000342376	1507	842	1025	701	641	643	750	649	831.127	886.805	1053.23	695.168	662.382	663.073	664.545	669.834	Down Regulated
ENSG00000158169	ENSG00000158169.13	FANCC	95099054	95426796	-1	mRNA	FA complementation group C [Source:HGNC Symbol;Acc:HGNC:3584]	369.339	-0.420118	0.104016	4.21e-06	0.000342376	587	300	359	264	239	206	264	223	323.737	315.964	368.888	261.804	246.972	212.431	233.92	230.159	Down Regulated
ENSG00000127083	ENSG00000127083.7	OMD	92412380	92424471	-1	mRNA	osteomodulin [Source:HGNC Symbol;Acc:HGNC:8134]	101.333	-1.01059	0.258606	4.3e-06	0.00034776	177	61	107	38	43	33	38	30	97.6175	64.246	109.947	37.6838	44.4343	34.0302	33.6703	30.963	Down Regulated
ENSG00000153071	ENSG00000153071.15	DAB2	39371675	39462300	-1	mRNA	DAB adaptor protein 2 [Source:HGNC Symbol;Acc:HGNC:2662]	5408.15	0.331347	0.0811142	4.41e-06	0.000354976	6397	4479	4317	5646	5795	5749	6539	5579	3528.02	4717.34	4435.91	5599.03	5988.3	5928.47	5793.95	5758.1	Up Regulated
ENSG00000137727	ENSG00000137727.12	ARHGAP20	110577042	110713189	-1	mRNA	Rho GTPase activating protein 20 [Source:HGNC Symbol;Acc:HGNC:18357]	489.902	-0.634151	0.161178	4.42e-06	0.000354976	2870	704	955	700	580	573	676	654	1582.84	741.462	981.304	694.176	599.347	590.888	598.977	674.994	Down Regulated
ENSG00000100441	ENSG00000100441.10	KHNYN	24429286	24441843	1	mRNA	KH and NYN domain containing [Source:HGNC Symbol;Acc:HGNC:20166]	2595.34	0.282493	0.0682539	4.45e-06	0.000356187	3511	2137	2097	2618	2672	2711	3100	2648	1936.36	2250.72	2154.76	2596.22	2761.13	2795.63	2746.79	2733.01	Up Regulated
ENSG00000116774	ENSG00000116774.12	OLFML3	113979391	114035572	1	mRNA	olfactomedin like 3 [Source:HGNC Symbol;Acc:HGNC:24956]	606.966	-0.824825	0.211653	4.5e-06	0.000358497	2584	719	863	512	463	408	533	509	1425.1	757.26	886.77	507.74	478.444	420.737	472.27	525.34	Down Regulated
ENSG00000151503	ENSG00000151503.12	NCAPD3	134150113	134225504	-1	mRNA	non-SMC condensin II complex subunit D3 [Source:HGNC Symbol;Acc:HGNC:28952]	2524.84	-0.354478	0.0873899	4.56e-06	0.000361547	5579	2816	3536	2327	2239	2189	2535	2271	3076.88	2965.85	3633.39	2307.64	2313.69	2257.34	2246.16	2343.9	Down Regulated
ENSG00000139618	ENSG00000139618.14	BRCA2	32315086	32400268	1	mRNA	BRCA2 DNA repair associated [Source:HGNC Symbol;Acc:HGNC:1101]	1851.81	-0.526114	0.133153	4.63e-06	0.000364959	3749	1863	2773	1522	1408	1209	1593	1444	2067.62	1962.14	2849.38	1509.34	1454.97	1246.74	1411.49	1490.35	Down Regulated
ENSG00000116127	ENSG00000116127.18	ALMS1	73385758	73625166	1	mRNA	ALMS1 centrosome and basal body associated protein [Source:HGNC Symbol;Acc:HGNC:428]	1242.89	-0.316387	0.0773258	4.64e-06	0.000364959	2148	990	1265	997	883	817	1014	878	1184.65	1042.68	1299.84	988.705	912.454	842.505	898.465	906.185	Down Regulated
ENSG00000163110	ENSG00000163110.15	PDLIM5	94451857	94668227	1	mRNA	PDZ and LIM domain 5 [Source:HGNC Symbol;Acc:HGNC:17468]	4429.66	-0.263348	0.0633306	4.66e-06	0.000365645	10403	4770	4522	4192	4129	3734	4512	3843	5737.37	5023.83	4646.55	4157.12	4266.73	3850.57	3997.9	3966.37	Down Regulated
ENSG00000123473	ENSG00000123473.15	STIL	47250139	47314892	-1	mRNA	STIL centriolar assembly protein [Source:HGNC Symbol;Acc:HGNC:10879]	1640.06	-0.499417	0.126222	4.72e-06	0.000368527	2974	1792	2289	1351	1218	1125	1316	1296	1640.19	1887.36	2352.05	1339.76	1258.63	1160.12	1166.06	1337.6	Down Regulated
ENSG00000276368	ENSG00000276368.1	H2AC14	27814302	27814777	-1	mRNA	H2A clustered histone 14 [Source:HGNC Symbol;Acc:HGNC:4727]	451.939	-1.09422	0.284246	4.91e-06	0.000381883	1339	907	1085	414	289	328	399	377	738.474	955.264	1114.88	410.556	298.64	338.24	353.538	389.102	Down Regulated
ENSG00000140455	ENSG00000140455.17	USP3	63504511	63594640	1	mRNA	ubiquitin specific peptidase 3 [Source:HGNC Symbol;Acc:HGNC:12626]	1633.77	0.290364	0.0707657	4.93e-06	0.000381883	2184	1467	1344	1823	1803	1753	2048	1824	1204.5	1545.06	1381.02	1807.83	1863.14	1807.73	1814.65	1882.55	Up Regulated
ENSG00000226564	ENSG00000226564.1	FTH1P20	180872867	180873414	-1	mRNA	ferritin heavy chain 1 pseudogene 20 [Source:HGNC Symbol;Acc:HGNC:37639]	1664.13	0.369545	0.0919799	5.06e-06	0.00039062	2230	1174	1053	1663	1665	1688	1909	1676	1229.87	1236.47	1082	1649.16	1720.54	1740.7	1691.49	1729.8	Up Regulated
ENSG00000123095	ENSG00000123095.6	BHLHE41	26120030	26125037	-1	mRNA	basic helix-loop-helix family member e41 [Source:HGNC Symbol;Acc:HGNC:16617]	211.371	0.945611	0.247244	5.49e-06	0.000422197	118	98	89	185	229	221	279	197	65.0783	103.215	91.4514	183.461	236.639	227.899	247.211	203.324	Up Regulated
ENSG00000047365	ENSG00000047365.12	ARAP2	35948221	36244514	-1	mRNA	ArfGAP with RhoGAP domain, ankyrin repeat and PH domain 2 [Source:HGNC Symbol;Acc:HGNC:16924]	104.531	-0.705948	0.182349	5.54e-06	0.000422197	223	143	158	79	73	74	94	60	122.987	150.609	162.352	78.3427	75.435	76.3102	83.2897	61.9261	Down Regulated
ENSG00000066427	ENSG00000066427.22	ATXN3	92044496	92106621	-1	mRNA	ataxin 3 [Source:HGNC Symbol;Acc:HGNC:7106]	1086.54	0.328256	0.0814309	5.54e-06	0.000422197	1554	994	966	1311	1344	1282	1497	1287	857.048	1046.89	992.607	1300.09	1388.83	1322.02	1326.43	1328.31	Up Regulated
ENSG00000131873	ENSG00000131873.7	CHSY1	101175727	101252048	-1	mRNA	chondroitin sulfate synthase 1 [Source:HGNC Symbol;Acc:HGNC:17198]	5551.96	0.264262	0.0642297	5.55e-06	0.000422197	6958	3854	3832	5023	4967	4944	5771	4991	3837.41	4059.08	3937.55	4981.21	5132.68	5098.34	5113.45	5151.22	Up Regulated
ENSG00000139083	ENSG00000139083.10	ETV6	11649674	11895377	1	mRNA	ETS variant transcription factor 6 [Source:HGNC Symbol;Acc:HGNC:3495]	2554.66	0.270122	0.0658871	5.62e-06	0.000424735	2170	1345	1249	1677	1728	1737	1817	1558	1196.78	1416.57	1283.4	1663.05	1785.64	1791.23	1609.97	1608.01	Up Regulated
ENSG00000185697	ENSG00000185697.16	MYBL1	66562175	66614247	-1	mRNA	MYB proto-oncogene like 1 [Source:HGNC Symbol;Acc:HGNC:7547]	304.346	-0.596254	0.154018	5.87e-06	0.000441405	827	470	542	296	281	227	358	286	456.1	495.01	556.929	293.537	290.373	234.087	317.21	295.181	Down Regulated
ENSG00000230453	ENSG00000230453.9	ANKRD18B	33524251	33573013	1	mRNA	ankyrin repeat domain 18B [Source:HGNC Symbol;Acc:HGNC:23644]	247.247	-1.04141	0.271017	5.93e-06	0.000444486	149	42	66	28	26	28	29	19	82.1752	44.2349	67.8179	27.767	26.8673	28.8741	25.6957	19.6099	Down Regulated
ENSG00000109805	ENSG00000109805.10	NCAPG	17810979	17844865	1	mRNA	non-SMC condensin I complex subunit G [Source:HGNC Symbol;Acc:HGNC:24304]	1435.92	-0.600008	0.155321	6e-06	0.000447903	2727	1604	2211	1131	1058	908	1132	1079	1503.97	1689.35	2271.9	1121.59	1093.29	936.346	1003.02	1113.64	Down Regulated
ENSG00000133302	ENSG00000133302.13	SLF1	94618669	94739436	1	mRNA	SMC5-SMC6 complex localization factor 1 [Source:HGNC Symbol;Acc:HGNC:25408]	578.091	-0.443672	0.11304	6.1e-06	0.000454165	1560	632	830	548	478	499	605	524	860.357	665.631	852.861	543.441	493.944	514.578	536.066	540.821	Down Regulated
ENSG00000077514	ENSG00000077514.8	POLD3	74493851	74669117	1	mRNA	DNA polymerase delta 3, accessory subunit [Source:HGNC Symbol;Acc:HGNC:20932]	1523.77	-0.374351	0.0943467	6.17e-06	0.000457059	4253	1791	2279	1429	1488	1411	1690	1478	2345.58	1886.3	2341.77	1417.11	1537.63	1455.05	1497.44	1525.45	Down Regulated
ENSG00000119138	ENSG00000119138.4	KLF9	70384604	70414657	-1	mRNA	Kruppel like factor 9 [Source:HGNC Symbol;Acc:HGNC:1123]	1679.66	0.370363	0.0934654	6.26e-06	0.000462308	2051	1608	1559	2082	2073	2061	2368	2152	1131.15	1693.57	1601.94	2064.68	2142.15	2125.34	2098.19	2221.08	Up Regulated
ENSG00000150907	ENSG00000150907.8	FOXO1	40555667	40666641	-1	mRNA	forkhead box O1 [Source:HGNC Symbol;Acc:HGNC:3819]	439.568	0.33805	0.0847707	6.46e-06	0.000475461	523	262	263	357	366	364	446	374	288.44	275.942	270.244	354.03	378.208	375.363	395.183	386.006	Up Regulated
ENSG00000143319	ENSG00000143319.16	ISG20L2	156721891	156728766	-1	mRNA	interferon stimulated exonuclease gene 20 like 2 [Source:HGNC Symbol;Acc:HGNC:25745]	1852.09	-0.26124	0.0639679	6.51e-06	0.000475725	3877	1853	2021	1611	1585	1466	1775	1618	2138.21	1951.6	2076.67	1597.6	1637.87	1511.77	1572.76	1669.94	Down Regulated
ENSG00000275379	ENSG00000275379.1	H3C11	27871845	27872346	-1	mRNA	H3 clustered histone 11 [Source:HGNC Symbol;Acc:HGNC:4771]	451.437	-0.983853	0.259775	6.51e-06	0.000475725	1119	581	658	266	195	217	354	263	617.141	611.917	676.124	263.787	201.505	223.774	313.665	271.443	Down Regulated
ENSG00000188042	ENSG00000188042.8	ARL4C	234493041	234497081	-1	mRNA	ADP ribosylation factor like GTPase 4C [Source:HGNC Symbol;Acc:HGNC:698]	1231.38	0.47347	0.1222	6.92e-06	0.000503456	2197	1231	1218	1724	1786	1966	2212	1970	1211.67	1296.51	1251.55	1709.66	1845.57	2027.38	1959.96	2033.24	Up Regulated
ENSG00000101670	ENSG00000101670.12	LIPG	49560699	49599185	1	mRNA	lipase G, endothelial type [Source:HGNC Symbol;Acc:HGNC:6623]	1333.88	-0.617033	0.161502	6.97e-06	0.000505219	6752	3237	2861	1842	1698	1837	2021	1889	3723.8	3409.25	2939.8	1826.67	1754.64	1894.35	1790.73	1949.64	Down Regulated
ENSG00000123427	ENSG00000123427.17	EEF1AKMT3	57771492	57782541	1	mRNA	EEF1A lysine methyltransferase 3 [Source:HGNC Symbol;Acc:HGNC:24936]	337.616	0.359949	0.0932389	6.99e-06	0.000505219	598	320	271	411	443	447	502	413	329.804	337.028	278.464	407.58	457.777	460.955	444.802	426.258	Up Regulated
ENSG00000156802	ENSG00000156802.13	ATAD2	123319850	123416350	-1	mRNA	ATPase family AAA domain containing 2 [Source:HGNC Symbol;Acc:HGNC:30123]	4390.63	-0.514583	0.133565	7.01e-06	0.000505219	11051	5149	7180	3928	3629	3527	4215	4084	6094.75	5422.99	7377.76	3895.32	3750.05	3637.11	3734.74	4215.1	Down Regulated
ENSG00000163918	ENSG00000163918.10	RFC4	186789880	186807058	-1	mRNA	replication factor C subunit 4 [Source:HGNC Symbol;Acc:HGNC:9972]	763.798	-0.448396	0.11558	7.2e-06	0.000517048	2253	1032	1144	738	719	685	841	788	1242.55	1086.92	1175.51	731.86	742.983	706.385	745.177	813.296	Down Regulated
ENSG00000109854	ENSG00000109854.13	HTATIP2	20363685	20383782	1	mRNA	HIV-1 Tat interactive protein 2 [Source:HGNC Symbol;Acc:HGNC:16637]	1019.17	0.280905	0.0700379	7.7e-06	0.000549185	1774	1091	964	1344	1323	1310	1622	1290	978.381	1149.06	990.552	1332.82	1367.13	1350.9	1437.19	1331.41	Up Regulated
ENSG00000165480	ENSG00000165480.16	SKA3	21153595	21176552	-1	mRNA	spindle and kinetochore associated complex subunit 3 [Source:HGNC Symbol;Acc:HGNC:20262]	569.474	-0.473577	0.123105	7.73e-06	0.000549185	1315	689	883	476	512	443	528	497	725.237	725.664	907.321	472.04	529.079	456.83	467.84	512.955	Down Regulated
ENSG00000146410	ENSG00000146410.12	MTFR2	136231024	136250335	-1	mRNA	mitochondrial fission regulator 2 [Source:HGNC Symbol;Acc:HGNC:21115]	341.355	-0.47404	0.123344	7.73e-06	0.000549185	518	342	421	249	230	207	260	227	285.683	360.199	432.596	246.928	237.672	213.462	230.376	234.287	Down Regulated
ENSG00000115687	ENSG00000115687.13	PASK	241106099	241150264	-1	mRNA	PAS domain containing serine/threonine kinase [Source:HGNC Symbol;Acc:HGNC:17270]	503.059	-0.555429	0.145771	7.87e-06	0.000556714	972	463	587	335	276	333	350	328	536.069	487.638	603.168	332.213	285.206	343.396	310.121	338.529	Down Regulated
ENSG00000100784	ENSG00000100784.12	RPS6KA5	90847861	91060641	-1	mRNA	ribosomal protein S6 kinase A5 [Source:HGNC Symbol;Acc:HGNC:10434]	150.641	-0.579786	0.151032	7.93e-06	0.000559161	348	116	153	121	93	92	115	88	191.926	122.173	157.214	119.993	96.1022	94.8721	101.897	90.8249	Down Regulated
ENSG00000198901	ENSG00000198901.14	PRC1	90966040	90995629	-1	mRNA	protein regulator of cytokinesis 1 [Source:HGNC Symbol;Acc:HGNC:9341]	88.6346	-0.62818	0.165927	8.28e-06	0.00057975	151	89	108	69	46	59	68	47	83.2782	93.7359	110.975	68.4259	47.5344	60.8419	60.2521	48.5088	Down Regulated
ENSG00000110092	ENSG00000110092.3	CCND1	69641156	69654474	1	mRNA	cyclin D1 [Source:HGNC Symbol;Acc:HGNC:1582]	2784.56	0.675147	0.17985	8.54e-06	0.000595069	1513	1646	961	2330	2494	2561	2765	2158	834.436	1733.59	987.469	2310.61	2577.19	2640.95	2449.96	2227.28	Up Regulated
ENSG00000123096	ENSG00000123096.11	SSPN	26121991	26299290	1	mRNA	sarcospan [Source:HGNC Symbol;Acc:HGNC:11322]	71.0444	0.645008	0.171376	8.55e-06	0.000595069	141	70	54	133	139	127	173	125	77.7631	73.7249	55.4874	131.893	143.637	130.965	153.288	129.013	Up Regulated
ENSG00000091651	ENSG00000091651.9	ORC6	46689643	46698394	1	mRNA	origin recognition complex subunit 6 [Source:HGNC Symbol;Acc:HGNC:17151]	379.649	-0.492781	0.129289	8.67e-06	0.000600539	1016	448	595	357	366	284	390	341	560.335	471.839	611.388	354.03	378.208	292.866	345.563	351.947	Down Regulated
ENSG00000110917	ENSG00000110917.8	MLEC	120687149	120701859	1	mRNA	malectin [Source:HGNC Symbol;Acc:HGNC:28973]	8243.17	-0.212171	0.0517362	8.69e-06	0.000600539	13336	6279	6140	5353	5503	5273	5976	5287	7354.95	6613.12	6309.12	5308.46	5686.56	5437.61	5295.1	5456.72	Down Regulated
ENSG00000170312	ENSG00000170312.15	CDK1	60778331	60794852	1	mRNA	cyclin dependent kinase 1 [Source:HGNC Symbol;Acc:HGNC:1722]	1205.64	-0.62636	0.166753	8.89e-06	0.000612393	2080	1208	1567	751	673	648	876	772	1147.14	1272.28	1610.16	744.752	695.449	668.229	776.189	796.782	Down Regulated
ENSG00000085733	ENSG00000085733.16	CTTN	70398404	70436584	1	mRNA	cortactin [Source:HGNC Symbol;Acc:HGNC:3338]	446.903	0.732264	0.196518	8.96e-06	0.000614739	231	180	159	328	351	351	415	313	127.399	189.578	163.379	325.271	362.708	361.958	367.715	323.048	Up Regulated
ENSG00000167670	ENSG00000167670.16	CHAF1A	4402640	4445018	1	mRNA	chromatin assembly factor 1 subunit A [Source:HGNC Symbol;Acc:HGNC:1910]	963.134	-0.486511	0.128053	9.1e-06	0.000621829	1989	948	1271	810	671	706	792	743	1096.96	998.446	1306.01	803.261	693.382	728.04	701.76	766.852	Down Regulated
ENSG00000166037	ENSG00000166037.11	CEP57	95789965	95832693	1	mRNA	centrosomal protein 57 [Source:HGNC Symbol;Acc:HGNC:30794]	1408.74	-0.306155	0.0777069	9.12e-06	0.000621829	3145	1591	1796	1390	1364	1231	1458	1251	1734.5	1675.66	1845.47	1378.44	1409.5	1269.43	1291.88	1291.16	Down Regulated
ENSG00000183850	ENSG00000183850.14	ZNF730	23075210	23147221	1	mRNA	zinc finger protein 730 [Source:HGNC Symbol;Acc:HGNC:32470]	187.234	-0.550378	0.145827	9.16e-06	0.00062194	366	202	242	161	121	132	156	133	201.853	212.749	248.666	159.66	125.036	136.121	138.225	137.27	Down Regulated
ENSG00000136273	ENSG00000136273.13	HUS1	47963288	47979615	-1	mRNA	HUS1 checkpoint clamp component [Source:HGNC Symbol;Acc:HGNC:5309]	937.175	0.228894	0.0565192	9.21e-06	0.000623419	1507	868	907	1076	1077	1027	1208	1146	831.127	914.189	931.982	1067.05	1112.92	1059.06	1070.36	1182.79	Up Regulated
ENSG00000124942	ENSG00000124942.14	AHNAK	62433542	62556235	-1	mRNA	AHNAK nucleoprotein [Source:HGNC Symbol;Acc:HGNC:347]	60575.2	0.393922	0.102383	9.36e-06	0.000631375	71702	45754	52724	71260	68938	71014	79258	70638	39544.5	48188.7	54176.2	70667.1	71237.5	73230.9	70227.4	72905.6	Up Regulated
ENSG00000008441	ENSG00000008441.16	NFIX	12995475	13098796	1	mRNA	nuclear factor I X [Source:HGNC Symbol;Acc:HGNC:7788]	190.374	0.582381	0.156864	9.45e-06	0.000635691	162	134	127	162	165	195	238	221	89.3448	141.131	130.498	160.652	170.504	201.088	210.882	228.094	Up Regulated
ENSG00000073464	ENSG00000073464.12	CLCN4	10156975	10237660	1	mRNA	chloride voltage-gated channel 4 [Source:HGNC Symbol;Acc:HGNC:2022]	563.779	0.450378	0.118437	9.53e-06	0.000637713	1029	677	631	1021	1047	987	1099	1045	567.505	713.025	648.38	1012.51	1081.92	1017.81	973.78	1078.55	Up Regulated
ENSG00000256029	ENSG00000256029.6		159834474	159873053	-1	mRNA	novel protein	58.9984	0.947504	0.258472	9.55e-06	0.000637713	29	32	26	67	76	83	64	68	15.9938	33.7028	26.7161	66.4426	78.5351	85.5911	56.7078	70.1829	Up Regulated
ENSG00000137563	ENSG00000137563.12	GGH	63014881	63039407	-1	mRNA	gamma-glutamyl hydrolase [Source:HGNC Symbol;Acc:HGNC:4248]	331.614	-0.684259	0.183823	9.58e-06	0.000637713	689	491	605	259	252	249	290	259	379.991	517.128	621.664	256.845	260.406	256.773	256.957	267.314	Down Regulated
ENSG00000205208	ENSG00000205208.5	C4orf46	158666675	158672255	-1	mRNA	chromosome 4 open reading frame 46 [Source:HGNC Symbol;Acc:HGNC:27320]	433.104	-0.500405	0.132835	1.01e-05	0.000666493	997	518	685	410	325	340	431	416	549.857	545.564	703.867	406.589	335.841	350.614	381.892	429.354	Down Regulated
ENSG00000172167	ENSG00000172167.8	MTBP	120445400	120542133	1	mRNA	MDM2 binding protein [Source:HGNC Symbol;Acc:HGNC:7417]	474.214	-0.439146	0.115634	1.02e-05	0.000669747	935	481	605	374	353	323	420	355	515.663	506.595	621.664	370.888	364.775	333.084	372.145	366.396	Down Regulated
ENSG00000121621	ENSG00000121621.7	KIF18A	28020619	28108156	-1	mRNA	kinesin family member 18A [Source:HGNC Symbol;Acc:HGNC:29441]	454.968	-0.469289	0.124281	1.03e-05	0.000677849	875	391	591	365	313	322	354	319	482.572	411.806	607.278	361.963	323.441	332.052	313.665	329.24	Down Regulated
ENSG00000107957	ENSG00000107957.16	SH3PXD2A	103594027	103855584	-1	mRNA	SH3 and PX domains 2A [Source:HGNC Symbol;Acc:HGNC:23664]	1279.69	0.34293	0.0886824	1.04e-05	0.000679581	1147	472	608	730	800	771	899	782	632.583	497.116	624.747	723.926	826.685	795.069	796.568	807.103	Up Regulated
ENSG00000183337	ENSG00000183337.16	BCOR	40049815	40177329	-1	mRNA	BCL6 corepressor [Source:HGNC Symbol;Acc:HGNC:20893]	3161.15	0.414795	0.109163	1.06e-05	0.000688934	2841	2044	1725	2582	2577	2738	3039	2801	1566.84	2152.77	1772.51	2560.52	2662.96	2823.48	2692.74	2890.92	Up Regulated
ENSG00000213967	ENSG00000213967.10	ZNF726	23914876	23945159	1	mRNA	zinc finger protein 726 [Source:HGNC Symbol;Acc:HGNC:32462]	66.2778	-0.738073	0.198986	1.07e-05	0.000690617	109	63	71	37	32	31	38	33	60.1147	66.3524	72.9556	36.6922	33.0674	31.9678	33.6703	34.0594	Down Regulated
ENSG00000132780	ENSG00000132780.17	NASP	45583846	45618904	1	mRNA	nuclear autoantigenic sperm protein [Source:HGNC Symbol;Acc:HGNC:7644]	3203.08	-0.396665	0.10402	1.07e-05	0.000690617	7170	2599	3747	2268	2256	2314	2532	2403	3954.34	2737.3	3850.21	2249.13	2331.25	2386.24	2243.5	2480.14	Down Regulated
ENSG00000136231	ENSG00000136231.14	IGF2BP3	23310209	23470491	-1	mRNA	insulin like growth factor 2 mRNA binding protein 3 [Source:HGNC Symbol;Acc:HGNC:28868]	68.4607	-0.716797	0.19402	1.12e-05	0.000718397	237	97	97	68	58	66	55	54	130.708	102.162	99.6717	67.4342	59.9347	68.0604	48.7333	55.7335	Down Regulated
ENSG00000253954	ENSG00000253954.3	HMGN1P38	92711808	92712110	1	mRNA	high mobility group nucleosome binding domain 1 pseudogene 38 [Source:HGNC Symbol;Acc:HGNC:39422]	608.545	-0.357127	0.0930106	1.12e-05	0.000718397	1771	761	753	599	588	575	680	583	976.726	801.495	773.74	594.016	607.614	592.951	602.521	601.715	Down Regulated
ENSG00000119801	ENSG00000119801.13	YPEL5	30146941	30160533	1	mRNA	yippee like 5 [Source:HGNC Symbol;Acc:HGNC:18329]	1285.01	0.296678	0.0761926	1.15e-05	0.000733509	2175	1221	1226	1563	1713	1540	1855	1574	1199.54	1285.97	1259.77	1550	1770.14	1588.08	1643.64	1624.53	Up Regulated
ENSG00000113569	ENSG00000113569.16	NUP155	37288137	37371106	-1	mRNA	nucleoporin 155 [Source:HGNC Symbol;Acc:HGNC:8063]	3972.66	-0.307902	0.0793267	1.15e-05	0.000733509	6668	3030	3442	2636	2527	2402	2917	2554	3677.48	3191.24	3536.81	2614.07	2611.29	2476.99	2584.64	2635.99	Down Regulated
ENSG00000205659	ENSG00000205659.10	LIN52	74084956	74201493	1	mRNA	lin-52 DREAM MuvB core complex component [Source:HGNC Symbol;Acc:HGNC:19856]	294.581	-0.41344	0.109434	1.18e-05	0.000752344	714	350	375	327	270	230	300	282	393.779	368.625	385.329	324.279	279.006	237.18	265.818	291.053	Down Regulated
ENSG00000089916	ENSG00000089916.17	GPATCH2L	76151916	76254342	1	mRNA	G-patch domain containing 2 like [Source:HGNC Symbol;Acc:HGNC:20210]	5348.09	0.267235	0.0680575	1.19e-05	0.000756016	6890	4022	4215	5293	5358	5137	5996	5233	3799.91	4236.02	4331.1	5248.96	5536.72	5297.37	5312.82	5400.99	Up Regulated
ENSG00000093000	ENSG00000093000.19	NUP50	45163925	45188017	1	mRNA	nucleoporin 50 [Source:HGNC Symbol;Acc:HGNC:8065]	2647.79	-0.280151	0.0708224	1.2e-05	0.000760565	5781	2665	3060	2217	2252	2123	2564	2340	3188.29	2806.81	3144.28	2198.55	2327.12	2189.28	2271.86	2415.12	Down Regulated
ENSG00000078269	ENSG00000078269.15	SYNJ2	157981863	158099176	1	mRNA	synaptojanin 2 [Source:HGNC Symbol;Acc:HGNC:11504]	3146.53	0.380677	0.100661	1.26e-05	0.000795242	3609	2310	1917	3310	3124	3267	3585	3084	1990.4	2432.92	1969.8	3282.46	3228.21	3368.99	3176.53	3183	Up Regulated
ENSG00000151725	ENSG00000151725.12	CENPU	184694085	184734130	-1	mRNA	centromere protein U [Source:HGNC Symbol;Acc:HGNC:21348]	599.343	-0.515425	0.139257	1.27e-05	0.00079526	1535	838	981	581	559	464	630	588	846.57	882.592	1008.02	576.166	577.646	478.485	558.218	606.876	Down Regulated
ENSG00000282226	ENSG00000282226.1		135676	149167	-1	mRNA	novel transcript	29.1416	0.781945	0.215703	1.27e-05	0.00079526	38	32	23	52	63	52	68	51	20.9574	33.7028	23.6335	51.5674	65.1015	53.6234	60.2521	52.6372	Up Regulated
ENSG00000121210	ENSG00000121210.16	TMEM131L	153466346	153636711	1	mRNA	transmembrane 131 like [Source:HGNC Symbol;Acc:HGNC:29146]	876.368	0.329667	0.0848441	1.29e-05	0.000806346	1042	666	718	831	881	864	1015	891	574.675	701.44	737.776	824.086	910.387	890.973	899.351	919.603	Up Regulated
ENSG00000109674	ENSG00000109674.4	NEIL3	177309874	177362936	1	mRNA	nei like DNA glycosylase 3 [Source:HGNC Symbol;Acc:HGNC:24573]	580.764	-0.422264	0.112862	1.31e-05	0.000810972	956	490	690	453	395	378	400	423	527.245	516.074	709.005	449.231	408.176	389.801	354.424	436.579	Down Regulated
ENSG00000147475	ENSG00000147475.15	ERLIN2	37736601	37758422	1	mRNA	ER lipid raft associated 2 [Source:HGNC Symbol;Acc:HGNC:1356]	6633.81	0.219773	0.0551844	1.34e-05	0.00082422	11674	6689	6161	7746	8142	7638	9055	7841	6438.34	7044.94	6330.7	7681.55	8413.59	7876.45	8023.27	8092.71	Up Regulated
ENSG00000119669	ENSG00000119669.5	IRF2BPL	77024543	77028708	-1	mRNA	interferon regulatory factor 2 binding protein like [Source:HGNC Symbol;Acc:HGNC:14282]	586.95	0.528097	0.143741	1.35e-05	0.000833126	580	526	381	507	567	652	849	623	319.876	553.99	391.494	502.782	585.913	672.354	752.265	642.999	Up Regulated
ENSG00000171877	ENSG00000171877.21	FRMD5	43870761	44195271	-1	mRNA	FERM domain containing 5 [Source:HGNC Symbol;Acc:HGNC:28214]	150.312	-0.693198	0.191577	1.41e-05	0.000863004	183	94	202	91	83	53	71	82	100.927	99.002	207.564	90.2429	85.7686	54.6546	62.9103	84.6323	Down Regulated
ENSG00000054118	ENSG00000054118.15	THRAP3	36224432	36305357	1	mRNA	thyroid hormone receptor associated protein 3 [Source:HGNC Symbol;Acc:HGNC:22964]	5203.19	0.178063	0.0438762	1.41e-05	0.000863403	8707	4579	4829	5476	5530	5635	6290	5551	4802.01	4822.66	4962.01	5430.44	5714.46	5810.91	5573.32	5729.2	Up Regulated
ENSG00000116497	ENSG00000116497.18	S100PBP	32816767	32858875	1	mRNA	S100P binding protein [Source:HGNC Symbol;Acc:HGNC:25768]	909.701	-0.324978	0.0853914	1.43e-05	0.000870106	1533	765	969	699	640	626	698	660	845.467	805.708	995.69	693.184	661.348	645.543	618.47	681.187	Down Regulated
ENSG00000138439	ENSG00000138439.12	FAM117B	202634969	202769757	1	mRNA	family with sequence similarity 117 member B [Source:HGNC Symbol;Acc:HGNC:14440]	254.149	0.411209	0.110466	1.43e-05	0.000870106	283	157	165	207	213	236	267	243	156.078	165.354	169.545	205.278	220.105	243.368	236.578	250.801	Up Regulated
ENSG00000178726	ENSG00000178726.6	THBD	23045633	23049672	-1	mRNA	thrombomodulin [Source:HGNC Symbol;Acc:HGNC:11784]	1817.49	0.50247	0.136814	1.45e-05	0.000876925	2195	732	835	1637	1579	1569	1900	1616	1210.57	770.952	857.999	1623.38	1631.67	1617.98	1683.51	1667.88	Up Regulated
ENSG00000197299	ENSG00000197299.12	BLM	90717346	90816166	1	mRNA	BLM RecQ like helicase [Source:HGNC Symbol;Acc:HGNC:1058]	1002.43	-0.489478	0.133172	1.46e-05	0.00088338	2187	1072	1337	812	793	686	862	773	1206.16	1129.04	1373.83	805.244	819.452	707.416	763.784	797.815	Down Regulated
ENSG00000114739	ENSG00000114739.14	ACVR2B	38453890	38493142	1	mRNA	activin A receptor type 2B [Source:HGNC Symbol;Acc:HGNC:174]	671.027	0.336976	0.089413	1.54e-05	0.000930378	740	395	433	602	603	568	691	568	408.118	416.019	444.926	596.991	623.114	585.732	612.268	586.234	Up Regulated
ENSG00000166803	ENSG00000166803.13	PCLAF	64364304	64387687	-1	mRNA	PCNA clamp associated factor [Source:HGNC Symbol;Acc:HGNC:28961]	377.425	-0.530937	0.146366	1.55e-05	0.000930381	1106	455	662	369	337	324	394	369	609.971	479.212	680.234	365.93	348.241	334.115	349.108	380.846	Down Regulated
ENSG00000139116	ENSG00000139116.18	KIF21A	39293228	39443390	-1	mRNA	kinesin family member 21A [Source:HGNC Symbol;Acc:HGNC:19349]	548.183	-0.382605	0.102659	1.58e-05	0.000946119	1496	615	702	531	490	477	550	532	825.061	647.726	721.336	526.582	506.345	491.891	487.333	549.078	Down Regulated
ENSG00000176834	ENSG00000176834.14	VSIG10	118063593	118136026	-1	mRNA	V-set and immunoglobulin domain containing 10 [Source:HGNC Symbol;Acc:HGNC:26078]	518.922	-0.402018	0.108433	1.58e-05	0.000946119	1243	623	774	536	468	443	536	525	685.528	656.152	795.319	531.541	483.611	456.83	474.928	541.853	Down Regulated
ENSG00000138658	ENSG00000138658.15	ZGRF1	112539333	112636995	-1	mRNA	zinc finger GRF-type containing 1 [Source:HGNC Symbol;Acc:HGNC:25654]	964.212	-0.429224	0.115444	1.59e-05	0.00094921	2344	1014	1406	906	865	765	954	830	1292.74	1067.96	1444.73	898.462	893.853	788.882	845.301	856.644	Down Regulated
ENSG00000232187	ENSG00000232187.1	FTH1P7	22696023	22696574	-1	mRNA	ferritin heavy chain 1 pseudogene 7 [Source:HGNC Symbol;Acc:HGNC:3994]	3721.39	0.442001	0.120427	1.64e-05	0.000971402	4014	2634	2358	3184	3346	3618	4241	3815	2213.77	2774.16	2422.95	3157.51	3457.61	3730.95	3757.78	3937.47	Up Regulated
ENSG00000111817	ENSG00000111817.17	DSE	116254173	116444861	1	mRNA	dermatan sulfate epimerase [Source:HGNC Symbol;Acc:HGNC:21144]	1259.94	-0.454107	0.124028	1.66e-05	0.000983093	4145	1676	1687	1169	1166	1228	1343	1190	2286.01	1765.18	1733.47	1159.27	1204.89	1266.34	1189.98	1228.2	Down Regulated
ENSG00000084444	ENSG00000084444.14	FAM234B	13044381	13142521	1	mRNA	family with sequence similarity 234 member B [Source:HGNC Symbol;Acc:HGNC:29288]	468.507	0.385934	0.106215	1.69e-05	0.000993131	468	367	367	527	558	507	531	485	258.107	386.529	377.109	522.615	576.613	522.828	470.498	500.569	Up Regulated
ENSG00000142731	ENSG00000142731.11	PLK4	127880893	127899224	1	mRNA	polo like kinase 4 [Source:HGNC Symbol;Acc:HGNC:11397]	667.152	-0.508904	0.140474	1.71e-05	0.00100369	1342	795	1094	608	572	477	642	551	740.128	837.304	1124.13	602.941	591.08	491.891	568.851	568.688	Down Regulated
ENSG00000275993	ENSG00000275993.2		6111131	6123778	1	mRNA	novel protein, similar to salt-inducible kinase 1 SIK1	129.594	0.722351	0.202493	1.71e-05	0.00100369	459	125	169	294	333	397	424	363	253.144	131.652	173.655	291.554	344.108	409.394	375.689	374.653	Up Regulated
ENSG00000203760	ENSG00000203760.8	CENPW	126340115	126348875	1	mRNA	centromere protein W [Source:HGNC Symbol;Acc:HGNC:21488]	350.604	-0.461075	0.126409	1.73e-05	0.00100541	734	364	471	282	256	252	317	271	404.809	383.369	483.973	279.654	264.539	259.867	280.881	279.7	Down Regulated
ENSG00000137145	ENSG00000137145.20	DENND4C	19230435	19374281	1	mRNA	DENN domain containing 4C [Source:HGNC Symbol;Acc:HGNC:26079]	3787.21	0.325512	0.0866936	1.73e-05	0.00100541	5901	4118	4123	5736	5764	5348	6204	5326	3254.47	4337.13	4236.56	5688.28	5956.27	5514.96	5497.12	5496.97	Up Regulated
ENSG00000076242	ENSG00000076242.14	MLH1	36993350	37050846	1	mRNA	mutL homolog 1 [Source:HGNC Symbol;Acc:HGNC:7127]	1235.43	-0.219353	0.0559205	1.73e-05	0.00100541	2803	1387	1505	1287	1225	1133	1455	1190	1545.89	1460.81	1546.45	1276.29	1265.86	1168.37	1289.22	1228.2	Down Regulated
ENSG00000155465	ENSG00000155465.18	SLC7A7	22773222	22829820	-1	mRNA	solute carrier family 7 member 7 [Source:HGNC Symbol;Acc:HGNC:11065]	3277.11	-0.32986	0.0879549	1.74e-05	0.00100541	9926	4840	4469	3646	3528	3560	4041	3578	5474.3	5097.55	4592.09	3615.67	3645.68	3671.14	3580.57	3692.86	Down Regulated
ENSG00000140022	ENSG00000140022.12	STON2	81260652	81436465	-1	mRNA	stonin 2 [Source:HGNC Symbol;Acc:HGNC:30652]	275.584	0.652144	0.183311	1.75e-05	0.00100739	149	147	173	246	306	246	292	249	82.1752	154.822	177.765	243.953	316.207	253.68	258.73	256.993	Up Regulated
ENSG00000197472	ENSG00000197472.15	ZNF695	246945547	247008093	-1	mRNA	zinc finger protein 695 [Source:HGNC Symbol;Acc:HGNC:30954]	279.581	-0.500607	0.138291	1.75e-05	0.00100739	511	297	384	243	209	195	215	217	281.822	312.804	394.577	240.978	215.972	201.088	190.503	223.966	Down Regulated
ENSG00000183763	ENSG00000183763.9	TRAIP	49828601	49856574	-1	mRNA	TRAF interacting protein [Source:HGNC Symbol;Acc:HGNC:30764]	145.92	-0.595479	0.166268	1.76e-05	0.00101187	279	159	210	121	99	88	132	97	153.872	167.461	215.784	119.993	102.302	90.7472	116.96	100.114	Down Regulated
ENSG00000137767	ENSG00000137767.14	SQOR	45631148	45691281	1	mRNA	sulfide quinone oxidoreductase [Source:HGNC Symbol;Acc:HGNC:20390]	2060.2	0.332868	0.0890893	1.8e-05	0.00103155	2975	1703	1496	2287	2167	2224	2764	2287	1640.75	1793.62	1537.21	2267.97	2239.28	2293.43	2449.07	2360.42	Up Regulated
ENSG00000173209	ENSG00000173209.23	AHSA2P	61177418	61191203	1	mRNA	activator of HSP90 ATPase homolog 2, pseudogene [Source:HGNC Symbol;Acc:HGNC:20437]	1333.01	0.207948	0.0529363	1.84e-05	0.00104788	2095	1040	1195	1385	1401	1348	1584	1377	1155.42	1095.34	1227.91	1373.48	1447.73	1390.08	1403.52	1421.2	Up Regulated
ENSG00000145088	ENSG00000145088.9	EAF2	121835183	121886526	1	mRNA	ELL associated factor 2 [Source:HGNC Symbol;Acc:HGNC:23115]	401.55	-0.354635	0.0956019	1.85e-05	0.00104788	782	388	500	352	356	300	362	289	431.282	408.647	513.772	349.071	367.875	309.365	320.754	298.277	Down Regulated
ENSG00000138760	ENSG00000138760.10	SCARB2	76158737	76234536	-1	mRNA	scavenger receptor class B member 2 [Source:HGNC Symbol;Acc:HGNC:1665]	15962.6	0.377136	0.102299	1.85e-05	0.00104788	21632	16545	14583	20839	22122	21380	23779	20354	11930.3	17425.4	14984.7	20665.6	22859.9	22047.4	21069.6	21007.4	Up Regulated
ENSG00000158270	ENSG00000158270.12	COLEC12	316737	500722	-1	mRNA	collectin subfamily member 12 [Source:HGNC Symbol;Acc:HGNC:16016]	206.443	-0.917866	0.261834	1.92e-05	0.00108276	1658	447	590	307	267	252	317	290	914.406	470.786	606.251	304.446	275.906	259.867	280.881	299.309	Down Regulated
ENSG00000196787	ENSG00000196787.3	H2AC11	27133043	27133535	1	mRNA	H2A clustered histone 11 [Source:HGNC Symbol;Acc:HGNC:4737]	1448.23	-0.914854	0.261163	1.92e-05	0.00108276	3789	2566	3050	1305	1015	1055	1323	1137	2089.68	2702.54	3134.01	1294.14	1048.86	1087.94	1172.26	1173.5	Down Regulated
ENSG00000179796	ENSG00000179796.12	LRRC3B	26622806	26717537	1	mRNA	leucine rich repeat containing 3B [Source:HGNC Symbol;Acc:HGNC:28105]	443.367	0.621198	0.175431	1.95e-05	0.00109522	235	157	212	354	348	347	383	329	129.605	165.354	217.839	351.055	359.608	357.833	339.361	339.561	Up Regulated
ENSG00000162909	ENSG00000162909.18	CAPN2	223701593	223776018	1	mRNA	calpain 2 [Source:HGNC Symbol;Acc:HGNC:1479]	3252.02	0.35077	0.0949568	1.96e-05	0.0011023	3757	2920	2905	3518	3751	3691	4413	3504	2072.03	3075.38	2985.01	3488.73	3876.12	3806.23	3910.18	3616.48	Up Regulated
ENSG00000134531	ENSG00000134531.10	EMP1	13196723	13219941	1	mRNA	epithelial membrane protein 1 [Source:HGNC Symbol;Acc:HGNC:3333]	6198	0.435998	0.120276	1.97e-05	0.00110278	6746	5782	5068	6598	7136	7801	8531	7042	3720.49	6089.68	5207.59	6543.1	7374.03	8044.53	7558.98	7268.06	Up Regulated
ENSG00000155561	ENSG00000155561.15	NUP205	135557917	135648757	1	mRNA	nucleoporin 205 [Source:HGNC Symbol;Acc:HGNC:18658]	3132.03	-0.270123	0.0711705	2e-05	0.00111529	7371	3144	3662	2985	2836	2804	3272	2687	4065.19	3311.3	3762.86	2960.16	2930.6	2891.54	2899.19	2773.26	Down Regulated
ENSG00000180596	ENSG00000180596.7	H2BC4	26114873	26123926	-1	mRNA	H2B clustered histone 4 [Source:HGNC Symbol;Acc:HGNC:4757]	1705.35	-0.80896	0.231282	2.05e-05	0.00113945	3834	2669	3039	1415	1158	1191	1443	1252	2114.49	2811.03	3122.71	1403.23	1196.63	1228.18	1278.58	1292.19	Down Regulated
ENSG00000143458	ENSG00000143458.12	GABPB2	151070578	151125542	1	mRNA	GA binding protein transcription factor subunit beta 2 [Source:HGNC Symbol;Acc:HGNC:28441]	1612.72	0.249474	0.0653863	2.06e-05	0.00114599	2285	1604	1766	1950	2092	1916	2207	1904	1260.2	1689.35	1814.64	1933.78	2161.78	1975.81	1955.53	1965.12	Up Regulated
ENSG00000268758	ENSG00000268758.7	ADGRE4P	6952500	6997872	-1	mRNA	adhesion G protein-coupled receptor E4, pseudogene [Source:HGNC Symbol;Acc:HGNC:19240]	800.561	0.371827	0.101701	2.08e-05	0.00115232	1113	754	796	1123	1109	1087	1255	1024	613.832	794.123	817.925	1113.66	1145.99	1120.93	1112.01	1056.87	Up Regulated
ENSG00000128408	ENSG00000128408.8	RIBC2	45413693	45432509	1	mRNA	RIB43A domain with coiled-coils 2 [Source:HGNC Symbol;Acc:HGNC:13241]	171.422	-0.53361	0.149951	2.13e-05	0.00117631	372	176	246	133	130	129	135	121	205.162	185.365	252.776	131.893	134.336	133.027	119.618	124.884	Down Regulated
ENSG00000132334	ENSG00000132334.16	PTPRE	127907103	128085855	1	mRNA	protein tyrosine phosphatase receptor type E [Source:HGNC Symbol;Acc:HGNC:9669]	2972.05	0.307755	0.0827548	2.15e-05	0.00118482	2914	1972	1863	2712	2631	2752	2763	2395	1607.1	2076.94	1914.31	2689.44	2718.76	2837.91	2448.18	2471.88	Up Regulated
ENSG00000112208	ENSG00000112208.11	BAG2	57172326	57189833	1	mRNA	BAG cochaperone 2 [Source:HGNC Symbol;Acc:HGNC:938]	686.757	-0.362683	0.0990109	2.17e-05	0.00118852	1655	644	729	615	568	532	623	535	912.751	678.269	749.079	609.883	586.947	548.608	552.015	552.174	Down Regulated
ENSG00000158406	ENSG00000158406.4	H4C8	26277609	26285638	-1	mRNA	H4 clustered histone 8 [Source:HGNC Symbol;Acc:HGNC:4788]	1191.1	-0.742218	0.212539	2.17e-05	0.00118852	1572	1080	1542	611	471	541	705	646	866.976	1137.47	1584.47	605.917	486.711	557.889	624.672	666.738	Down Regulated
ENSG00000278828	ENSG00000278828.1	H3C10	27810051	27811300	1	mRNA	H3 clustered histone 10 [Source:HGNC Symbol;Acc:HGNC:4775]	1145.12	-1.1794	0.342737	2.23e-05	0.00121512	2299	1448	1946	659	472	484	676	537	1267.92	1525.05	1999.6	653.517	487.744	499.11	598.977	554.239	Down Regulated
ENSG00000255112	ENSG00000255112.2	CHMP1B	11851413	11854444	1	mRNA	charged multivesicular body protein 1B [Source:HGNC Symbol;Acc:HGNC:24287]	1607.91	0.239533	0.0627241	2.23e-05	0.00121569	2978	1410	1524	1908	1887	1979	2166	1926	1642.4	1485.03	1565.98	1892.13	1949.94	2040.78	1919.21	1987.83	Up Regulated
ENSG00000163406	ENSG00000163406.11	SLC15A2	121894401	121944188	1	mRNA	solute carrier family 15 member 2 [Source:HGNC Symbol;Acc:HGNC:10921]	387.267	-0.500082	0.140706	2.26e-05	0.00122931	469	263	304	190	184	155	191	176	258.659	276.995	312.373	188.419	190.138	159.839	169.237	181.65	Down Regulated
ENSG00000206053	ENSG00000206053.13	JPT2	1678256	1702280	1	mRNA	Jupiter microtubule associated homolog 2 [Source:HGNC Symbol;Acc:HGNC:14137]	1539.45	-0.288491	0.0773257	2.31e-05	0.00124819	3155	1572	1630	1271	1185	1249	1428	1266	1740.02	1655.65	1674.9	1260.43	1224.53	1287.99	1265.29	1306.64	Down Regulated
ENSG00000101003	ENSG00000101003.10	GINS1	25391008	25452700	1	mRNA	GINS complex subunit 1 [Source:HGNC Symbol;Acc:HGNC:28980]	803.272	-0.473395	0.131984	2.31e-05	0.00124819	1650	794	1101	599	541	595	670	621	909.993	836.251	1131.33	594.016	559.046	613.575	593.66	640.935	Down Regulated
ENSG00000113161	ENSG00000113161.16	HMGCR	75336329	75364001	1	mRNA	3-hydroxy-3-methylglutaryl-CoA reductase [Source:HGNC Symbol;Acc:HGNC:5006]	4498.34	0.33123	0.0902907	2.35e-05	0.00126418	5810	4518	3973	5052	5437	5465	6159	5121	3204.28	4758.42	4082.43	5009.97	5618.36	5635.61	5457.24	5285.39	Up Regulated
ENSG00000134853	ENSG00000134853.12	PDGFRA	54229280	54298245	1	mRNA	platelet derived growth factor receptor alpha [Source:HGNC Symbol;Acc:HGNC:8803]	261.592	0.833666	0.241713	2.37e-05	0.00126581	207	254	154	363	444	431	474	395	114.163	267.516	158.242	359.98	458.81	444.455	419.992	407.68	Up Regulated
ENSG00000184678	ENSG00000184678.10	H2BC21	149884459	149886682	-1	mRNA	H2B clustered histone 21 [Source:HGNC Symbol;Acc:HGNC:4760]	4571.15	-0.758786	0.218973	2.37e-05	0.00126581	7370	5544	5998	3019	2296	2547	2993	2733	4064.64	5839.01	6163.21	2993.88	2372.59	2626.51	2651.98	2820.73	Down Regulated
ENSG00000116668	ENSG00000116668.13	SWT1	185157080	185291781	1	mRNA	SWT1 RNA endoribonuclease homolog [Source:HGNC Symbol;Acc:HGNC:16785]	488.81	0.413254	0.115331	2.39e-05	0.00127384	617	459	450	653	697	627	750	601	340.282	483.425	462.395	647.567	720.249	646.574	664.545	620.293	Up Regulated
ENSG00000104549	ENSG00000104549.12	SQLE	124998497	125022283	1	mRNA	squalene epoxidase [Source:HGNC Symbol;Acc:HGNC:11279]	12237.3	0.391666	0.108674	2.41e-05	0.0012798	10761	8524	6939	9604	10214	10944	12299	9726	5934.81	8977.59	7130.13	9524.1	10554.7	11285.7	10897.7	10038.2	Up Regulated
ENSG00000178202	ENSG00000178202.13	POGLUT3	108472112	108498384	-1	mRNA	protein O-glucosyltransferase 3 [Source:HGNC Symbol;Acc:HGNC:28496]	852.708	-0.393992	0.109409	2.42e-05	0.00128597	2061	990	1176	846	816	761	806	750	1136.66	1042.68	1208.39	838.961	843.219	784.757	714.164	774.076	Down Regulated
ENSG00000274997	ENSG00000274997.1	H2AC12	27147106	27147562	1	mRNA	H2A clustered histone 12 [Source:HGNC Symbol;Acc:HGNC:13671]	961.471	-1.00177	0.292363	2.45e-05	0.00129463	2457	1661	2021	774	648	644	743	676	1355.06	1749.39	2076.67	767.56	669.615	664.105	658.343	697.701	Down Regulated
ENSG00000143622	ENSG00000143622.11	RIT1	155897808	155911404	-1	mRNA	Ras like without CAAX 1 [Source:HGNC Symbol;Acc:HGNC:10023]	1851.87	0.357786	0.0988139	2.54e-05	0.00133536	3539	1905	1706	2772	2820	2637	3055	2730	1951.8	2006.37	1752.99	2748.94	2914.07	2719.32	2706.91	2817.64	Up Regulated
ENSG00000135686	ENSG00000135686.13	KLHL36	84648511	84667686	1	mRNA	kelch like family member 36 [Source:HGNC Symbol;Acc:HGNC:17844]	2421.07	0.209512	0.0547924	2.55e-05	0.00133829	3698	2196	1942	2563	2519	2578	2917	2472	2039.49	2312.86	1995.49	2541.68	2603.03	2658.48	2584.64	2551.36	Up Regulated
ENSG00000169116	ENSG00000169116.11	PARM1	74933095	75050115	1	mRNA	prostate androgen-regulated mucin-like protein 1 [Source:HGNC Symbol;Acc:HGNC:24536]	857.831	-0.634214	0.182683	2.56e-05	0.0013406	1597	871	601	428	434	446	477	382	880.763	917.348	617.554	424.439	448.477	459.923	422.651	394.263	Down Regulated
ENSG00000102024	ENSG00000102024.18	PLS3	115561174	115650861	1	mRNA	plastin 3 [Source:HGNC Symbol;Acc:HGNC:9091]	202.217	0.784689	0.229754	2.57e-05	0.00134345	17	20	21	52	46	45	41	49	9.37569	21.0643	21.5784	51.5674	47.5344	46.4048	36.3285	50.573	Up Regulated
ENSG00000112851	ENSG00000112851.14	ERBIN	65926556	66082546	1	mRNA	erbb2 interacting protein [Source:HGNC Symbol;Acc:HGNC:15842]	7117.98	0.323143	0.0884719	2.6e-05	0.00135189	9104	6094	6026	7713	7992	7662	9330	7741	5020.96	6418.28	6191.98	7648.83	8258.59	7901.19	8266.94	7989.5	Up Regulated
ENSG00000278272	ENSG00000278272.1		NA	NA	NA	mRNA		1154.72	-1.2192	0.359719	2.65e-05	0.00137259	2484	1737	2118	713	544	539	623	619	1369.95	1829.43	2176.34	707.068	562.146	555.827	552.015	638.871	Down Regulated
ENSG00000205927	ENSG00000205927.5	OLIG2	33025935	33029196	1	mRNA	oligodendrocyte transcription factor 2 [Source:HGNC Symbol;Acc:HGNC:9398]	258.725	0.44119	0.124863	2.65e-05	0.00137259	316	231	213	309	300	331	381	319	174.278	243.292	218.867	306.429	310.007	341.333	337.589	329.24	Up Regulated
ENSG00000221829	ENSG00000221829.9	FANCG	35073835	35080004	-1	mRNA	FA complementation group G [Source:HGNC Symbol;Acc:HGNC:3588]	578.308	-0.535461	0.153274	2.66e-05	0.00137259	1279	656	816	441	460	419	498	394	705.383	690.908	838.476	437.331	475.344	432.08	441.258	406.648	Down Regulated
ENSG00000197405	ENSG00000197405.8	C5AR1	47290023	47322066	1	mRNA	complement C5a receptor 1 [Source:HGNC Symbol;Acc:HGNC:1338]	3484.42	0.604007	0.174203	2.66e-05	0.00137259	2261	1896	1572	2852	2872	3284	3339	2956	1246.97	1996.89	1615.3	2828.27	2967.8	3386.52	2958.55	3050.89	Up Regulated
ENSG00000168078	ENSG00000168078.10	PBK	27809624	27838082	-1	mRNA	PDZ binding kinase [Source:HGNC Symbol;Acc:HGNC:18282]	472.993	-0.638225	0.184866	2.71e-05	0.00139553	1051	606	905	426	390	313	446	418	579.638	638.247	929.927	422.456	403.009	322.771	395.183	431.418	Down Regulated
ENSG00000142657	ENSG00000142657.21	PGD	10398592	10420511	1	mRNA	phosphogluconate dehydrogenase [Source:HGNC Symbol;Acc:HGNC:8891]	6528.94	0.406257	0.114255	2.76e-05	0.00141301	10061	4497	4471	7747	7198	7709	8608	7706	5548.75	4736.3	4594.15	7682.55	7438.1	7949.66	7627.21	7953.38	Up Regulated
ENSG00000167995	ENSG00000167995.16	BEST1	61950063	61965515	1	mRNA	bestrophin 1 [Source:HGNC Symbol;Acc:HGNC:12703]	1417.91	0.351461	0.097526	2.78e-05	0.00141734	2381	1041	1134	1663	1694	1774	1848	1594	1313.15	1096.39	1165.23	1649.16	1750.51	1829.38	1637.44	1645.17	Up Regulated
ENSG00000114796	ENSG00000114796.16	KLHL24	183635610	183684519	1	mRNA	kelch like family member 24 [Source:HGNC Symbol;Acc:HGNC:25947]	1774.39	0.3285	0.0906465	2.82e-05	0.0014299	2592	1383	1479	2067	2078	1928	2318	2058	1429.52	1456.59	1519.74	2049.8	2147.31	1988.19	2053.89	2124.07	Up Regulated
ENSG00000180543	ENSG00000180543.4	TSPYL5	97273488	97277928	-1	mRNA	TSPY like 5 [Source:HGNC Symbol;Acc:HGNC:29367]	2728.53	0.258651	0.0694505	2.82e-05	0.0014299	4344	2428	2157	2926	3036	3020	3366	2934	2395.76	2557.2	2216.41	2901.66	3137.27	3114.28	2982.48	3028.19	Up Regulated
ENSG00000158246	ENSG00000158246.8	TENT5B	27005020	27012850	-1	mRNA	terminal nucleotidyltransferase 5B [Source:HGNC Symbol;Acc:HGNC:28273]	14.6192	-1.32466	0.381229	2.87e-05	0.00144799	50	26	24	9	5	7	11	9	27.5756	27.3835	24.661	8.92512	5.16678	7.21853	9.74666	9.28891	Down Regulated
ENSG00000141655	ENSG00000141655.17	TNFRSF11A	62325287	62391288	1	mRNA	TNF receptor superfamily member 11a [Source:HGNC Symbol;Acc:HGNC:11908]	203.234	-0.567404	0.162409	2.88e-05	0.00145043	524	302	327	152	161	179	200	169	288.992	318.07	336.007	150.735	166.37	184.588	177.212	174.425	Down Regulated
ENSG00000058804	ENSG00000058804.12	NDC1	53765478	53838463	-1	mRNA	NDC1 transmembrane nucleoporin [Source:HGNC Symbol;Acc:HGNC:25525]	2976.38	-0.368765	0.103226	2.93e-05	0.00147076	7713	3258	3759	2724	2727	2472	2947	2646	4253.81	3431.37	3862.54	2701.34	2817.96	2549.17	2611.22	2730.94	Down Regulated
ENSG00000120756	ENSG00000120756.13	PLS1	142596393	142713664	1	mRNA	plastin 1 [Source:HGNC Symbol;Acc:HGNC:9090]	56.1863	-0.749419	0.218629	2.97e-05	0.00148365	157	66	72	52	38	33	47	41	86.5873	69.5121	73.9831	51.5674	39.2675	34.0302	41.6448	42.3162	Down Regulated
ENSG00000113070	ENSG00000113070.8	HBEGF	140332843	140346603	-1	mRNA	heparin binding EGF like growth factor [Source:HGNC Symbol;Acc:HGNC:3059]	809.083	0.592474	0.172442	2.98e-05	0.00148365	563	526	328	885	885	865	912	672	310.501	553.99	337.034	877.637	914.521	892.004	808.087	693.572	Up Regulated
ENSG00000188985	ENSG00000188985.6	DHFRP1	26170726	26171284	-1	mRNA	dihydrofolate reductase pseudogene 1 [Source:HGNC Symbol;Acc:HGNC:2862]	767.003	-0.491656	0.141243	2.98e-05	0.00148365	2102	1051	1374	841	765	740	794	786	1159.28	1106.93	1411.84	834.003	790.518	763.102	703.532	811.232	Down Regulated
ENSG00000017483	ENSG00000017483.15	SLC38A5	48458537	48470260	-1	mRNA	solute carrier family 38 member 5 [Source:HGNC Symbol;Acc:HGNC:18070]	399.459	-0.610514	0.177311	2.99e-05	0.00148528	1005	293	279	233	198	215	232	221	554.269	308.591	286.685	231.061	204.605	221.712	205.566	228.094	Down Regulated
ENSG00000109881	ENSG00000109881.17	CCDC34	27330827	27363234	-1	mRNA	coiled-coil domain containing 34 [Source:HGNC Symbol;Acc:HGNC:25079]	87.3142	-0.729289	0.213713	3.06e-05	0.00151177	179	108	115	81	47	57	60	68	98.7205	113.747	118.168	80.3261	48.5678	58.7794	53.1636	70.1829	Down Regulated
ENSG00000171867	ENSG00000171867.16	PRNP	4686350	4701590	1	mRNA	prion protein [Source:HGNC Symbol;Acc:HGNC:9449]	1238.81	0.230879	0.0615376	3.07e-05	0.00151177	2512	1604	1454	1900	1920	1895	2085	1822	1385.4	1689.35	1494.05	1884.19	1984.04	1954.16	1847.44	1880.49	Up Regulated
ENSG00000143195	ENSG00000143195.13	ILDR2	166895711	166975540	-1	mRNA	immunoglobulin like domain containing receptor 2 [Source:HGNC Symbol;Acc:HGNC:18131]	101.044	-0.567556	0.16465	3.09e-05	0.00152192	184	108	116	81	66	50	78	73	101.478	113.747	119.195	80.3261	68.2015	51.5609	69.1127	75.3434	Down Regulated
ENSG00000148773	ENSG00000148773.14	MKI67	128096659	128126423	-1	mRNA	marker of proliferation Ki-67 [Source:HGNC Symbol;Acc:HGNC:7107]	7032.89	-0.601316	0.175822	3.17e-05	0.00154744	3870	2489	3861	1800	1610	1515	1747	1705	2134.35	2621.45	3967.35	1785.02	1663.7	1562.3	1547.95	1759.73	Down Regulated
ENSG00000123131	ENSG00000123131.13	PRDX4	23664262	23686397	1	mRNA	peroxiredoxin 4 [Source:HGNC Symbol;Acc:HGNC:17169]	852.264	-0.23591	0.0630654	3.17e-05	0.00154744	2020	995	881	924	812	765	984	817	1114.05	1047.95	905.266	916.312	839.085	788.882	871.883	843.227	Down Regulated
ENSG00000011426	ENSG00000011426.11	ANLN	36389821	36453791	1	mRNA	anillin actin binding protein [Source:HGNC Symbol;Acc:HGNC:14082]	1935.47	-0.518136	0.150175	3.18e-05	0.00154744	3391	1994	2865	1405	1369	1292	1529	1378	1870.17	2100.11	2943.91	1393.31	1414.67	1332.33	1354.79	1422.24	Down Regulated
ENSG00000115648	ENSG00000115648.14	MLPH	237485428	237555322	1	mRNA	melanophilin [Source:HGNC Symbol;Acc:HGNC:29643]	94.9969	0.668106	0.196928	3.18e-05	0.00154744	157	113	114	227	225	216	275	216	86.5873	119.013	117.14	225.111	232.505	222.743	243.667	222.934	Up Regulated
ENSG00000196747	ENSG00000196747.4	H2AC13	27808173	27808667	1	mRNA	H2A clustered histone 13 [Source:HGNC Symbol;Acc:HGNC:4725]	839.812	-1.10141	0.329479	3.18e-05	0.00154744	2449	1564	2076	736	526	559	766	618	1350.65	1647.22	2133.18	729.877	543.546	576.451	678.722	637.839	Down Regulated
ENSG00000188467	ENSG00000188467.10	SLC24A5	48120990	48142672	1	mRNA	solute carrier family 24 member 5 [Source:HGNC Symbol;Acc:HGNC:20611]	17.9444	1.1288	0.331015	3.2e-05	0.0015522	25	8	14	4	24	29	27	24	13.7878	8.4257	14.3856	3.96672	24.8006	29.9053	23.9236	24.7704	Up Regulated
ENSG00000178295	ENSG00000178295.15	GEN1	17753858	17788946	1	mRNA	GEN1 Holliday junction 5 flap endonuclease [Source:HGNC Symbol;Acc:HGNC:26881]	1329.07	-0.356818	0.100292	3.21e-05	0.0015536	2500	1464	1781	1303	1244	988	1264	1117	1378.78	1541.9	1830.06	1292.16	1285.5	1018.84	1119.98	1152.86	Down Regulated
ENSG00000175305	ENSG00000175305.17	CCNE2	94879770	94896678	-1	mRNA	cyclin E2 [Source:HGNC Symbol;Acc:HGNC:1590]	646.565	-0.485796	0.140382	3.25e-05	0.00156886	2015	909	1197	739	683	618	777	700	1111.3	957.371	1229.97	732.852	705.783	637.293	688.469	722.471	Down Regulated
ENSG00000196208	ENSG00000196208.14	GREB1	11482341	11642788	1	mRNA	growth regulating estrogen receptor binding 1 [Source:HGNC Symbol;Acc:HGNC:24885]	104.324	0.518201	0.150887	3.27e-05	0.00157067	161	117	93	144	176	155	182	162	88.7933	123.226	95.5616	142.802	181.871	159.839	161.263	167.2	Up Regulated
ENSG00000167900	ENSG00000167900.12	TK1	78174091	78187233	-1	mRNA	thymidine kinase 1 [Source:HGNC Symbol;Acc:HGNC:11830]	1008.37	-0.768981	0.22804	3.27e-05	0.00157067	2145	1019	1394	758	516	559	689	670	1182.99	1073.22	1432.4	751.693	533.212	576.451	610.495	691.508	Down Regulated
ENSG00000181982	ENSG00000181982.18	CCDC149	24803514	24980204	-1	mRNA	coiled-coil domain containing 149 [Source:HGNC Symbol;Acc:HGNC:25405]	558.156	0.346559	0.0974483	3.34e-05	0.00159986	648	365	381	436	494	467	568	531	357.379	384.423	391.494	432.372	510.478	481.579	503.282	548.046	Up Regulated
ENSG00000048740	ENSG00000048740.18	CELF2	10798397	11336675	1	mRNA	CUGBP Elav-like family member 2 [Source:HGNC Symbol;Acc:HGNC:2550]	6373.5	0.18056	0.0470013	3.36e-05	0.00160486	7057	3900	4096	4782	4958	4580	5329	4659	3892.01	4107.53	4208.82	4742.21	5123.38	4722.98	4721.81	4808.56	Up Regulated
ENSG00000138613	ENSG00000138613.14	APH1B	63276018	63309126	1	mRNA	aph-1 homolog B, gamma-secretase subunit [Source:HGNC Symbol;Acc:HGNC:24080]	738.558	0.306493	0.0850036	3.37e-05	0.00160486	1362	652	658	959	967	943	1096	911	751.158	686.695	676.124	951.021	999.256	972.439	971.122	940.245	Up Regulated
ENSG00000124198	ENSG00000124198.9	ARFGEF2	48921711	49036693	1	mRNA	ADP ribosylation factor guanine nucleotide exchange factor 2 [Source:HGNC Symbol;Acc:HGNC:15853]	4426.46	0.164614	0.0424711	3.44e-05	0.00163486	8004	4217	4195	4863	5127	4819	5648	4891	4414.3	4441.4	4310.55	4822.54	5298.02	4969.44	5004.47	5048.01	Up Regulated
ENSG00000110911	ENSG00000110911.15	SLC11A2	50979401	51028566	-1	mRNA	solute carrier family 11 member 2 [Source:HGNC Symbol;Acc:HGNC:10908]	2389.99	0.308283	0.0857185	3.44e-05	0.00163486	3927	2153	2072	2643	2908	2818	3232	2784	2165.78	2267.57	2129.07	2621.01	3005	2905.97	2863.75	2873.37	Up Regulated
ENSG00000122966	ENSG00000122966.16	CIT	119685791	119877320	-1	mRNA	citron rho-interacting serine/threonine kinase [Source:HGNC Symbol;Acc:HGNC:1985]	1135.9	-0.529568	0.154887	3.47e-05	0.00164137	1215	773	1217	627	560	503	574	583	670.086	814.134	1250.52	621.783	578.68	518.703	508.599	601.715	Down Regulated
ENSG00000105011	ENSG00000105011.9	ASF1B	14119512	14136613	-1	mRNA	anti-silencing function 1B histone chaperone [Source:HGNC Symbol;Acc:HGNC:20996]	1115.5	-0.688372	0.204476	3.52e-05	0.00166312	2397	1421	1591	788	704	651	908	802	1321.97	1496.62	1634.82	781.444	727.483	671.323	804.543	827.746	Down Regulated
ENSG00000111231	ENSG00000111231.9	GPN3	110452486	110469268	-1	mRNA	GPN-loop GTPase 3 [Source:HGNC Symbol;Acc:HGNC:30186]	830.289	-0.296545	0.082247	3.55e-05	0.0016722	1826	1058	1081	765	768	777	921	740	1007.06	1114.3	1110.77	758.635	793.618	801.257	816.061	763.755	Down Regulated
ENSG00000075702	ENSG00000075702.18	WDR62	36054649	36105108	1	mRNA	WD repeat domain 62 [Source:HGNC Symbol;Acc:HGNC:24502]	394.62	-0.606362	0.179194	3.58e-05	0.00168359	725	378	500	255	246	231	253	244	399.846	398.114	513.772	252.878	254.206	238.211	224.173	251.833	Down Regulated
ENSG00000138780	ENSG00000138780.14	GSTCD	105708778	105847725	1	mRNA	glutathione S-transferase C-terminal domain containing [Source:HGNC Symbol;Acc:HGNC:25806]	635.894	-0.328175	0.0924901	3.59e-05	0.00168359	1755	700	875	642	614	570	686	670	967.902	737.249	899.101	636.659	634.481	587.794	607.837	691.508	Down Regulated
ENSG00000143751	ENSG00000143751.10	SDE2	225982702	225999343	-1	mRNA	SDE2 telomere maintenance homolog [Source:HGNC Symbol;Acc:HGNC:26643]	3433.99	0.248503	0.0675945	3.65e-05	0.00170949	6944	2960	3504	4454	4353	4487	5031	4372	3829.69	3117.51	3600.51	4416.94	4498.2	4627.08	4457.77	4512.35	Up Regulated
ENSG00000136235	ENSG00000136235.16	GPNMB	23235967	23275108	1	mRNA	glycoprotein nmb [Source:HGNC Symbol;Acc:HGNC:4462]	15623.5	0.334686	0.0945828	3.78e-05	0.00175927	35566	22097	20861	31340	30088	29710	34188	30698	19615	23272.8	21435.6	31079.3	31091.6	30637.5	30292.6	31683.5	Up Regulated
ENSG00000168393	ENSG00000168393.13	DTYMK	241675747	241686944	-1	mRNA	deoxythymidylate kinase [Source:HGNC Symbol;Acc:HGNC:3061]	656.981	-0.488347	0.142973	3.78e-05	0.00175927	1426	805	999	588	501	504	677	551	786.455	847.836	1026.52	583.108	517.712	519.734	599.863	568.688	Down Regulated
ENSG00000277775	ENSG00000277775.1	H3C7	26250142	26250635	-1	mRNA	H3 clustered histone 7 [Source:HGNC Symbol;Acc:HGNC:4773]	1222.17	-1.15258	0.350579	3.79e-05	0.00175949	3634	2274	2890	1004	748	730	988	897	2004.19	2395.01	2969.6	995.647	772.951	752.789	875.427	925.795	Down Regulated
ENSG00000131462	ENSG00000131462.8	TUBG1	42609641	42615238	1	mRNA	tubulin gamma 1 [Source:HGNC Symbol;Acc:HGNC:12417]	451.912	-0.54812	0.161824	3.8e-05	0.00175983	849	466	521	365	292	292	333	296	468.233	490.797	535.35	361.963	301.74	301.116	295.058	305.502	Down Regulated
ENSG00000214826	ENSG00000214826.5	DDX12P	9418673	9448229	-1	mRNA	DEAD/H-box helicase 12, pseudogene [Source:HGNC Symbol;Acc:HGNC:2737]	126.607	-0.664407	0.198641	3.9e-05	0.00180088	284	147	215	128	113	84	113	82	156.629	154.822	220.922	126.935	116.769	86.6223	100.125	84.6323	Down Regulated
ENSG00000255397	ENSG00000255397.1	NASPP1	60937705	60939871	-1	mRNA	nuclear autoantigenic sperm protein pseudogene 1 [Source:HGNC Symbol;Acc:HGNC:29910]	212.145	-0.428065	0.124026	3.92e-05	0.00180371	402	186	223	159	142	120	166	155	221.708	195.898	229.142	157.677	146.737	123.746	147.086	159.976	Down Regulated
ENSG00000165406	ENSG00000165406.16	MARCHF8	45454585	45594906	-1	mRNA	membrane associated ring-CH-type finger 8 [Source:HGNC Symbol;Acc:HGNC:23356]	89.1715	0.514782	0.151346	3.95e-05	0.00181189	104	56	44	55	82	84	97	67	57.3572	58.9799	45.2119	54.5424	84.7352	86.6223	85.9478	69.1508	Up Regulated
ENSG00000162607	ENSG00000162607.13	USP1	62436297	62451804	1	mRNA	ubiquitin specific peptidase 1 [Source:HGNC Symbol;Acc:HGNC:12607]	2234.22	-0.402821	0.116421	3.95e-05	0.00181189	5978	2928	3388	2118	2178	1944	2404	2271	3296.93	3083.81	3481.32	2100.38	2250.65	2004.69	2130.09	2343.9	Down Regulated
ENSG00000163171	ENSG00000163171.7	CDC42EP3	37641882	37738468	-1	mRNA	CDC42 effector protein 3 [Source:HGNC Symbol;Acc:HGNC:16943]	1929.69	0.61057	0.182291	3.97e-05	0.00181493	884	1343	1161	2294	2327	2050	2390	2003	487.536	1414.46	1192.98	2274.91	2404.62	2114	2117.68	2067.3	Up Regulated
ENSG00000070950	ENSG00000070950.10	RAD18	8775402	8963773	-1	mRNA	RAD18 E3 ubiquitin protein ligase [Source:HGNC Symbol;Acc:HGNC:18278]	668.649	-0.3019	0.0845556	3.98e-05	0.00181493	1420	655	783	586	554	521	661	556	783.146	689.854	804.567	581.125	572.48	537.265	585.686	573.849	Down Regulated
ENSG00000205581	ENSG00000205581.11	HMGN1	39342315	39349647	-1	mRNA	high mobility group nucleosome binding domain 1 [Source:HGNC Symbol;Acc:HGNC:4984]	2998.27	-0.314814	0.0887983	4.06e-05	0.00184877	8327	3487	3558	2865	2802	2686	3353	2854	4592.43	3672.55	3656	2841.16	2895.46	2769.85	2970.96	2945.62	Down Regulated
ENSG00000160753	ENSG00000160753.16	RUSC1	155320894	155331114	1	mRNA	RUN and SH3 domain containing 1 [Source:HGNC Symbol;Acc:HGNC:17153]	594.116	-0.449443	0.131522	4.09e-05	0.00185566	1180	598	714	453	453	428	491	374	650.783	629.821	733.666	449.231	468.111	441.361	435.056	386.006	Down Regulated
ENSG00000184371	ENSG00000184371.14	CSF1	109910242	109930992	1	mRNA	colony stimulating factor 1 [Source:HGNC Symbol;Acc:HGNC:2432]	524.149	0.910138	0.277446	4.11e-05	0.00185701	150	167	124	338	342	352	486	328	82.7267	175.887	127.415	335.188	353.408	362.989	430.625	338.529	Up Regulated
ENSG00000277157	ENSG00000277157.1	H4C4	26188710	26189112	-1	mRNA	H4 clustered histone 4 [Source:HGNC Symbol;Acc:HGNC:4782]	1390.45	-0.897058	0.272963	4.11e-05	0.00185701	2495	1612	2227	843	755	677	816	799	1376.02	1697.78	2288.34	835.986	780.184	698.135	723.025	824.649	Down Regulated
ENSG00000135778	ENSG00000135778.12	NTPCR	232950605	232983882	1	mRNA	nucleoside-triphosphatase, cancer-related [Source:HGNC Symbol;Acc:HGNC:28204]	1488.65	0.200676	0.0536537	4.15e-05	0.00186523	2576	1439	1367	1798	1806	1760	1929	1668	1420.69	1515.57	1404.65	1783.04	1866.24	1814.94	1709.21	1721.55	Up Regulated
ENSG00000170425	ENSG00000170425.3	ADORA2B	15945130	15975746	1	mRNA	adenosine A2b receptor [Source:HGNC Symbol;Acc:HGNC:264]	209.384	0.571718	0.171011	4.16e-05	0.00186523	230	193	167	333	347	306	349	306	126.848	203.27	171.6	330.229	358.575	315.553	309.235	315.823	Up Regulated
ENSG00000149294	ENSG00000149294.16	NCAM1	112961247	113278436	1	mRNA	neural cell adhesion molecule 1 [Source:HGNC Symbol;Acc:HGNC:7656]	292.025	0.866578	0.264623	4.16e-05	0.00186523	26	19	25	44	47	44	64	48	14.3393	20.011	25.6886	43.6339	48.5678	45.3736	56.7078	49.5409	Up Regulated
ENSG00000105173	ENSG00000105173.14	CCNE1	29811991	29824312	1	mRNA	cyclin E1 [Source:HGNC Symbol;Acc:HGNC:1589]	326.455	-0.494394	0.14613	4.21e-05	0.00188436	823	432	534	287	298	272	336	284	453.894	454.988	548.708	284.612	307.94	280.491	297.716	293.117	Down Regulated
ENSG00000180011	ENSG00000180011.7	ZADH2	75195113	75209139	-1	mRNA	zinc binding alcohol dehydrogenase domain containing 2 [Source:HGNC Symbol;Acc:HGNC:28697]	1064.11	0.26801	0.0745272	4.25e-05	0.00189631	1388	1013	981	1116	1157	1168	1350	1189	765.498	1066.9	1008.02	1106.71	1195.59	1204.46	1196.18	1227.17	Up Regulated
ENSG00000184384	ENSG00000184384.14	MAML2	95976598	96343195	-1	mRNA	mastermind like transcriptional coactivator 2 [Source:HGNC Symbol;Acc:HGNC:16259]	3720.94	0.333189	0.0950273	4.26e-05	0.00189763	3963	3166	2834	4168	4152	4080	4372	3769	2185.64	3334.47	2912.06	4133.32	4290.5	4207.37	3873.85	3889.99	Up Regulated
ENSG00000225968	ENSG00000225968.7	ELFN1	1665745	1747946	1	mRNA	extracellular leucine rich repeat and fibronectin type III domain containing 1 [Source:HGNC Symbol;Acc:HGNC:33154]	44.1703	1.24869	0.385681	4.28e-05	0.00190062	16	9	7	20	28	28	38	30	8.82418	9.47892	7.19281	19.8336	28.934	28.8741	33.6703	30.963	Up Regulated
ENSG00000088833	ENSG00000088833.17	NSFL1C	1442162	1473842	-1	mRNA	NSFL1 cofactor [Source:HGNC Symbol;Acc:HGNC:15912]	586.376	-0.275331	0.0767619	4.33e-05	0.00192035	1237	615	682	535	485	528	572	509	682.219	647.726	700.785	530.549	501.178	544.483	506.826	525.34	Down Regulated
ENSG00000092621	ENSG00000092621.12	PHGDH	119648411	119744218	1	mRNA	phosphoglycerate dehydrogenase [Source:HGNC Symbol;Acc:HGNC:8923]	1159.92	-0.539565	0.160922	4.35e-05	0.0019234	782	366	465	286	247	245	263	281	431.282	385.476	477.808	283.62	255.239	252.648	233.034	290.021	Down Regulated
ENSG00000198176	ENSG00000198176.13	TFDP1	113584721	113641473	1	mRNA	transcription factor Dp-1 [Source:HGNC Symbol;Acc:HGNC:11749]	2025	-0.25816	0.0714545	4.36e-05	0.0019234	4223	2119	2331	1837	1727	1665	2048	1833	2329.03	2231.76	2395.2	1821.72	1784.61	1716.98	1814.65	1891.84	Down Regulated
ENSG00000164128	ENSG00000164128.7	NPY1R	163323962	163344832	-1	mRNA	neuropeptide Y receptor Y1 [Source:HGNC Symbol;Acc:HGNC:7956]	35.9795	-0.85711	0.261271	4.46e-05	0.00196676	42	48	50	35	21	18	17	22	23.1635	50.5542	51.3772	34.7088	21.7005	18.5619	15.063	22.7062	Down Regulated
ENSG00000119950	ENSG00000119950.21	MXI1	110207605	110287365	1	mRNA	MAX interactor 1, dimerization protein [Source:HGNC Symbol;Acc:HGNC:7534]	456.745	0.370103	0.107293	4.49e-05	0.00197291	533	296	277	470	429	497	473	418	293.955	311.751	284.63	466.09	443.31	512.515	419.106	431.418	Up Regulated
ENSG00000185127	ENSG00000185127.6	C6orf120	169702190	169704856	1	mRNA	chromosome 6 open reading frame 120 [Source:HGNC Symbol;Acc:HGNC:21247]	2280.13	0.272243	0.0760819	4.51e-05	0.00197398	4311	2323	2143	2668	2975	2851	3364	2839	2377.56	2446.61	2202.03	2645.8	3074.24	2940	2980.71	2930.14	Up Regulated
ENSG00000233822	ENSG00000233822.4	H2BC15	27838545	27855709	1	mRNA	H2B clustered histone 15 [Source:HGNC Symbol;Acc:HGNC:4749]	689.37	-0.769931	0.234937	4.51e-05	0.00197398	1034	742	902	390	325	303	419	407	570.263	781.484	926.844	386.755	335.841	312.459	371.259	420.065	Down Regulated
ENSG00000149929	ENSG00000149929.15	HIRIP3	29992330	29996074	-1	mRNA	HIRA interacting protein 3 [Source:HGNC Symbol;Acc:HGNC:4917]	247.126	-0.45945	0.135789	4.52e-05	0.00197398	486	249	308	228	173	172	211	197	268.034	262.25	316.483	226.103	178.771	177.37	186.959	203.324	Down Regulated
ENSG00000067842	ENSG00000067842.17	ATP2B3	153517642	153582939	1	mRNA	ATPase plasma membrane Ca2+ transporting 3 [Source:HGNC Symbol;Acc:HGNC:816]	53.0476	0.822253	0.252299	4.54e-05	0.00197675	65	48	55	87	102	103	136	101	35.8482	50.5542	56.5149	86.2762	105.402	106.215	120.504	104.242	Up Regulated
ENSG00000165338	ENSG00000165338.16	HECTD2	91409280	91514829	1	mRNA	HECT domain E3 ubiquitin protein ligase 2 [Source:HGNC Symbol;Acc:HGNC:26736]	384.445	-0.484221	0.143941	4.64e-05	0.00201583	526	257	316	163	180	144	202	196	290.095	270.676	324.704	161.644	186.004	148.495	178.984	202.292	Down Regulated
ENSG00000137812	ENSG00000137812.19	KNL1	40594020	40664342	1	mRNA	kinetochore scaffold 1 [Source:HGNC Symbol;Acc:HGNC:24054]	2174.81	-0.520265	0.155766	4.66e-05	0.00201648	3691	2334	3124	1497	1555	1409	1675	1490	2035.63	2458.2	3210.05	1484.55	1606.87	1452.99	1484.15	1537.83	Down Regulated
ENSG00000274290	ENSG00000274290.2	H2BC6	26172059	26184655	1	mRNA	H2B clustered histone 6 [Source:HGNC Symbol;Acc:HGNC:4753]	900.475	-0.937057	0.288947	4.69e-05	0.00202506	1646	1122	1466	520	444	443	539	529	907.787	1181.7	1506.38	515.674	458.81	456.83	477.586	545.982	Down Regulated
ENSG00000116983	ENSG00000116983.13	HPCAL4	39678648	39691485	-1	mRNA	hippocalcin like 4 [Source:HGNC Symbol;Acc:HGNC:18212]	143.906	-0.83568	0.256576	4.7e-05	0.00202652	331	173	236	80	65	123	92	74	182.55	182.206	242.5	79.3344	67.1682	126.84	81.5175	76.3755	Down Regulated
ENSG00000213160	ENSG00000213160.10	KLHL23	169694488	169776989	1	mRNA	kelch like family member 23 [Source:HGNC Symbol;Acc:HGNC:27506]	260.129	-0.480748	0.142997	4.75e-05	0.0020435	709	279	338	232	201	203	242	229	391.021	293.846	347.31	230.07	207.705	209.337	214.427	236.351	Down Regulated
ENSG00000008513	ENSG00000008513.16	ST3GAL1	133454848	133571940	-1	mRNA	ST3 beta-galactoside alpha-2,3-sialyltransferase 1 [Source:HGNC Symbol;Acc:HGNC:10862]	4824.09	0.34662	0.100179	4.77e-05	0.00204828	5445	3888	3669	5611	5241	5472	5752	5201	3002.98	4094.89	3770.06	5564.32	5415.82	5642.83	5096.62	5367.96	Up Regulated
ENSG00000140044	ENSG00000140044.13	JDP2	75427716	75474111	1	mRNA	Jun dimerization protein 2 [Source:HGNC Symbol;Acc:HGNC:17546]	412.905	-0.60003	0.181712	4.84e-05	0.00207582	1350	450	485	377	292	309	378	335	744.54	473.946	498.359	373.863	301.74	318.646	334.931	345.754	Down Regulated
ENSG00000072501	ENSG00000072501.17	SMC1A	53374149	53422728	-1	mRNA	structural maintenance of chromosomes 1A [Source:HGNC Symbol;Acc:HGNC:11111]	4068.66	-0.270768	0.0761608	4.97e-05	0.00212649	7106	3337	4287	2821	2818	2753	3250	3158	3919.04	3514.57	4405.08	2797.53	2912	2838.94	2879.7	3259.38	Down Regulated
ENSG00000103540	ENSG00000103540.16	CCP110	19523811	19553408	1	mRNA	centriolar coiled-coil protein 110 [Source:HGNC Symbol;Acc:HGNC:24342]	981.61	-0.412336	0.121893	5.06e-05	0.00215301	1940	922	1314	719	776	688	804	721	1069.93	971.062	1350.19	713.018	801.885	709.478	712.392	744.145	Down Regulated
ENSG00000183856	ENSG00000183856.11	IQGAP3	156525405	156572604	-1	mRNA	IQ motif containing GTPase activating protein 3 [Source:HGNC Symbol;Acc:HGNC:20669]	2066.63	-0.532258	0.160819	5.06e-05	0.00215301	3146	2268	2956	1515	1426	1277	1532	1478	1735.05	2388.69	3037.42	1502.4	1473.57	1316.87	1357.44	1525.45	Down Regulated
ENSG00000186185	ENSG00000186185.13	KIF18B	44924709	44947773	-1	mRNA	kinesin family member 18B [Source:HGNC Symbol;Acc:HGNC:27102]	517.863	-0.704801	0.216471	5.07e-05	0.00215301	742	425	614	274	218	237	271	282	409.221	447.615	630.912	271.72	225.272	244.399	240.122	291.053	Down Regulated
ENSG00000170791	ENSG00000170791.17	CHCHD7	56211686	56218809	1	mRNA	coiled-coil-helix-coiled-coil-helix domain containing 7 [Source:HGNC Symbol;Acc:HGNC:28314]	781.676	-0.277824	0.0787005	5.27e-05	0.00222565	2034	1011	981	838	783	753	953	800	1121.77	1064.8	1008.02	831.028	809.118	776.507	844.415	825.681	Down Regulated
ENSG00000042088	ENSG00000042088.13	TDP1	89954939	90044764	1	mRNA	tyrosyl-DNA phosphodiesterase 1 [Source:HGNC Symbol;Acc:HGNC:18884]	949.279	-0.202175	0.0550448	5.38e-05	0.0022625	1839	916	1090	857	850	836	941	795	1014.23	964.743	1120.02	849.87	878.353	862.098	833.783	820.521	Down Regulated
ENSG00000265273	ENSG00000265273.1	PGDP1	31962178	31963618	1	mRNA	phosphogluconate dehydrogenase pseudogene 1 [Source:HGNC Symbol;Acc:HGNC:8892]	1169.04	0.375195	0.110467	5.4e-05	0.00226478	1939	871	968	1542	1386	1508	1644	1562	1069.38	917.348	994.662	1529.17	1432.23	1555.08	1456.68	1612.14	Up Regulated
ENSG00000083844	ENSG00000083844.10	ZNF264	57191500	57222846	1	mRNA	zinc finger protein 264 [Source:HGNC Symbol;Acc:HGNC:13057]	1346.48	0.229017	0.0634058	5.43e-05	0.00227412	1824	843	902	967	1035	1075	1235	1202	1005.96	887.858	926.844	958.955	1069.52	1108.56	1094.28	1240.59	Up Regulated
ENSG00000165246	ENSG00000165246.14	NLGN4Y	14522573	14845654	1	mRNA	neuroligin 4 Y-linked [Source:HGNC Symbol;Acc:HGNC:15529]	541.461	-0.386056	0.113967	5.47e-05	0.00228091	1515	603	697	449	446	465	562	497	835.539	635.087	716.198	445.264	460.877	479.516	497.966	512.955	Down Regulated
ENSG00000104687	ENSG00000104687.14	GSR	30678066	30727846	-1	mRNA	glutathione-disulfide reductase [Source:HGNC Symbol;Acc:HGNC:4623]	4826.59	0.225676	0.0624405	5.49e-05	0.00228091	10049	5264	4933	6783	6677	6554	7566	6597	5542.14	5544.11	5068.87	6726.57	6899.72	6758.6	6703.93	6808.77	Up Regulated
ENSG00000124496	ENSG00000124496.12	TRERF1	42224931	42452051	-1	mRNA	transcriptional regulating factor 1 [Source:HGNC Symbol;Acc:HGNC:18273]	2747.47	0.299021	0.0858902	5.49e-05	0.00228091	3509	2363	2229	2882	2958	2953	3303	2935	1935.25	2488.74	2290.39	2858.02	3056.67	3045.19	2926.66	3029.22	Up Regulated
ENSG00000221843	ENSG00000221843.4	C2orf16	27537386	27582720	1	mRNA	chromosome 2 open reading frame 16 [Source:HGNC Symbol;Acc:HGNC:25275]	222.395	0.438422	0.131618	5.5e-05	0.00228091	238	148	133	243	241	224	243	230	131.26	155.876	136.663	240.978	249.039	230.993	215.313	237.383	Up Regulated
ENSG00000109184	ENSG00000109184.15	DCUN1D4	51843000	51916837	1	mRNA	defective in cullin neddylation 1 domain containing 4 [Source:HGNC Symbol;Acc:HGNC:28998]	797.368	-0.331296	0.0962223	5.5e-05	0.00228091	1725	721	830	648	648	589	690	578	951.357	759.366	852.861	642.609	669.615	607.388	611.381	596.555	Down Regulated
ENSG00000284859	ENSG00000284859.1	MIR124-1HG	10046775	10053583	1	mRNA	MIR124-1 host gene [Source:HGNC Symbol;Acc:HGNC:27231]	25.7153	1.02281	0.322282	5.51e-05	0.0022813	27	31	19	79	93	83	78	72	14.8908	32.6496	19.5233	78.3427	96.1022	85.5911	69.1127	74.3113	Up Regulated
ENSG00000175455	ENSG00000175455.15	CCDC14	123897305	123961408	-1	mRNA	coiled-coil domain containing 14 [Source:HGNC Symbol;Acc:HGNC:25766]	2349.23	-0.315311	0.091181	5.53e-05	0.00228341	4694	2654	2994	2191	2060	1882	2407	2050	2588.79	2795.23	3076.47	2172.77	2128.71	1940.75	2132.75	2115.81	Down Regulated
ENSG00000100714	ENSG00000100714.16	MTHFD1	64388031	64463457	1	mRNA	methylenetetrahydrofolate dehydrogenase, cyclohydrolase and formyltetrahydrofolate synthetase 1 [Source:HGNC Symbol;Acc:HGNC:7432]	1068.64	-0.285818	0.0815244	5.54e-05	0.00228341	2202	804	1056	816	753	763	904	795	1214.43	846.783	1085.09	809.211	778.117	786.82	800.998	820.521	Down Regulated
ENSG00000276291	ENSG00000276291.5	FRG1HP	40992245	41218410	1	mRNA	FSHD region gene 1 family member H, pseudogene [Source:HGNC Symbol;Acc:HGNC:51767]	545.559	0.248161	0.0697571	5.58e-05	0.00229455	888	591	571	650	679	697	761	697	489.742	622.449	586.727	644.592	701.649	718.759	674.292	719.375	Up Regulated
ENSG00000087842	ENSG00000087842.11	PIR	15384799	15493564	-1	mRNA	pirin [Source:HGNC Symbol;Acc:HGNC:30048]	256.992	0.516354	0.156929	5.62e-05	0.00230536	518	179	168	454	412	379	511	376	285.683	188.525	172.627	450.223	425.743	390.832	452.777	388.07	Up Regulated
ENSG00000173848	ENSG00000173848.19	NET1	5412557	5459056	1	mRNA	neuroepithelial cell transforming 1 [Source:HGNC Symbol;Acc:HGNC:14592]	455.181	-0.389263	0.115564	5.63e-05	0.00230536	679	455	493	296	318	299	305	298	374.476	479.212	506.579	293.537	328.607	308.334	270.248	307.566	Down Regulated
ENSG00000127920	ENSG00000127920.5	GNG11	93921735	93928610	1	mRNA	G protein subunit gamma 11 [Source:HGNC Symbol;Acc:HGNC:4403]	131.78	0.841974	0.262445	5.68e-05	0.00232142	30	13	24	29	38	31	58	37	16.5453	13.6918	24.661	28.7587	39.2675	31.9678	51.3915	38.1878	Up Regulated
ENSG00000152409	ENSG00000152409.9	JMY	79236131	79327211	1	mRNA	junction mediating and regulatory protein, p53 cofactor [Source:HGNC Symbol;Acc:HGNC:28916]	768.178	0.310865	0.0906513	5.69e-05	0.00232142	894	608	608	826	831	735	895	833	493.051	640.353	624.747	819.128	858.719	757.945	793.024	859.741	Up Regulated
ENSG00000166949	ENSG00000166949.16	SMAD3	67063763	67195173	1	mRNA	SMAD family member 3 [Source:HGNC Symbol;Acc:HGNC:6769]	1364.98	0.382753	0.113624	5.72e-05	0.00232729	1168	947	982	1336	1308	1290	1449	1346	644.165	997.393	1009.05	1324.88	1351.63	1330.27	1283.9	1389.21	Up Regulated
ENSG00000137269	ENSG00000137269.15	LRRC1	53794497	53924125	1	mRNA	leucine rich repeat containing 1 [Source:HGNC Symbol;Acc:HGNC:14307]	144.323	-0.446781	0.135158	5.73e-05	0.00232883	337	163	199	130	112	119	152	108	185.859	171.674	204.481	128.918	115.736	122.715	134.681	111.467	Down Regulated
ENSG00000142528	ENSG00000142528.16	ZNF473	50025714	50053414	1	mRNA	zinc finger protein 473 [Source:HGNC Symbol;Acc:HGNC:23239]	943.574	-0.304129	0.0877765	5.76e-05	0.00233537	2065	948	1044	852	771	804	884	775	1138.87	998.446	1072.76	844.911	796.718	829.099	783.277	799.879	Down Regulated
ENSG00000108306	ENSG00000108306.13	FBXL20	39252663	39402523	-1	mRNA	F-box and leucine rich repeat protein 20 [Source:HGNC Symbol;Acc:HGNC:24679]	1446.81	0.217389	0.0602122	5.92e-05	0.00238645	1860	933	1071	1291	1337	1241	1416	1216	1025.81	982.648	1100.5	1280.26	1381.6	1279.74	1254.66	1255.04	Up Regulated
ENSG00000163781	ENSG00000163781.13	TOPBP1	133598175	133662380	-1	mRNA	DNA topoisomerase II binding protein 1 [Source:HGNC Symbol;Acc:HGNC:17008]	3391.14	-0.282943	0.081132	5.92e-05	0.00238645	8380	3884	4664	3560	3526	3209	3712	3344	4621.66	4090.68	4792.46	3530.38	3643.62	3309.18	3289.06	3451.35	Down Regulated
ENSG00000123737	ENSG00000123737.12	EXOSC9	121801318	121817021	1	mRNA	exosome component 9 [Source:HGNC Symbol;Acc:HGNC:9137]	597.917	-0.300532	0.0868173	5.95e-05	0.00239514	1461	666	768	644	604	543	675	530	805.758	701.44	789.154	638.642	624.147	559.952	598.091	547.014	Down Regulated
ENSG00000081870	ENSG00000081870.11	HSPB11	53916574	53945699	-1	mRNA	heat shock protein family B (small) member 11 [Source:HGNC Symbol;Acc:HGNC:25019]	736.24	-0.32937	0.0962742	5.97e-05	0.00239805	1894	852	945	734	696	687	785	677	1044.56	897.337	971.029	727.893	719.216	708.447	695.557	698.733	Down Regulated
ENSG00000099901	ENSG00000099901.17	RANBP1	20115938	20127355	1	mRNA	RAN binding protein 1 [Source:HGNC Symbol;Acc:HGNC:9847]	893.074	-0.336306	0.0986702	6.1e-05	0.00243266	2584	1051	1128	832	784	797	1084	861	1425.1	1106.93	1159.07	825.078	810.152	821.881	960.489	888.64	Down Regulated
ENSG00000144283	ENSG00000144283.21	PKP4	158456952	158682879	1	mRNA	plakophilin 4 [Source:HGNC Symbol;Acc:HGNC:9026]	1934.28	-0.259252	0.0736484	6.11e-05	0.00243412	3358	1637	1943	1411	1307	1433	1640	1389	1851.97	1724.11	1996.52	1399.26	1350.6	1477.74	1453.14	1433.59	Down Regulated
ENSG00000164002	ENSG00000164002.11	EXO5	40508741	40516038	1	mRNA	exonuclease 5 [Source:HGNC Symbol;Acc:HGNC:26115]	2292.85	-0.215173	0.0597048	6.22e-05	0.00247124	4935	2708	2789	2472	2202	2288	2571	2264	2721.71	2852.1	2865.82	2451.43	2275.45	2359.43	2278.06	2336.68	Down Regulated
ENSG00000125450	ENSG00000125450.11	NUP85	75205659	75235758	1	mRNA	nucleoporin 85 [Source:HGNC Symbol;Acc:HGNC:8734]	1077.72	-0.261768	0.0745742	6.27e-05	0.00248623	2701	1204	1352	1140	1034	1066	1222	1040	1489.63	1268.07	1389.24	1130.52	1068.49	1099.28	1082.77	1073.39	Down Regulated
ENSG00000175322	ENSG00000175322.11	ZNF519	14057457	14132490	-1	mRNA	zinc finger protein 519 [Source:HGNC Symbol;Acc:HGNC:30574]	368.776	-0.396628	0.11872	6.28e-05	0.00248624	658	263	335	237	249	206	240	209	362.894	276.995	344.227	235.028	257.306	212.431	212.654	215.709	Down Regulated
ENSG00000237522	ENSG00000237522.1	NONOP2	60936819	60938049	-1	mRNA	non-POU domain containing, octamer-binding pseudogene 2 [Source:HGNC Symbol;Acc:HGNC:42032]	195.96	-0.373717	0.111284	6.3e-05	0.00249015	412	208	221	216	179	143	185	161	227.223	219.068	227.087	214.203	184.971	147.464	163.921	166.168	Down Regulated
ENSG00000154928	ENSG00000154928.18	EPHB1	134795260	135260467	1	mRNA	EPH receptor B1 [Source:HGNC Symbol;Acc:HGNC:3392]	66.2032	1.09646	0.351892	6.43e-05	0.00253142	12	9	14	42	53	33	52	33	6.61813	9.47892	14.3856	41.6506	54.7679	34.0302	46.0751	34.0594	Up Regulated
ENSG00000152954	ENSG00000152954.12	NRSN1	24126186	24154900	1	mRNA	neurensin 1 [Source:HGNC Symbol;Acc:HGNC:17881]	103.552	0.843674	0.267845	6.46e-05	0.00253923	79	75	53	193	185	161	221	162	43.5694	78.991	54.4598	191.394	191.171	166.026	195.819	167.2	Up Regulated
ENSG00000181915	ENSG00000181915.4	ADO	62804720	62808479	1	mRNA	2-aminoethanethiol dioxygenase [Source:HGNC Symbol;Acc:HGNC:23506]	1340.16	0.374875	0.112286	6.55e-05	0.00256653	1438	1160	935	1561	1603	1427	1633	1442	793.073	1221.73	960.753	1548.01	1656.47	1471.55	1446.94	1488.29	Up Regulated
ENSG00000119599	ENSG00000119599.16	DCAF4	72926377	72959703	1	mRNA	DDB1 and CUL4 associated factor 4 [Source:HGNC Symbol;Acc:HGNC:20229]	290.19	0.336635	0.0996239	6.65e-05	0.00259747	459	264	210	305	332	325	403	318	253.144	278.048	215.784	302.462	343.074	335.146	357.082	328.208	Up Regulated
ENSG00000166592	ENSG00000166592.12	RRAD	66921679	66925536	-1	mRNA	RRAD, Ras related glycolysis inhibitor and calcium channel regulator [Source:HGNC Symbol;Acc:HGNC:10446]	162.122	-1.66448	0.532938	6.68e-05	0.00259857	214	31	45	19	7	22	14	14	118.023	32.6496	46.2395	18.8419	7.2335	22.6868	12.4048	14.4494	Down Regulated
ENSG00000137168	ENSG00000137168.8	PPIL1	36854827	36874803	-1	mRNA	peptidylprolyl isomerase like 1 [Source:HGNC Symbol;Acc:HGNC:9260]	740.858	-0.278643	0.0804571	6.7e-05	0.00259857	1795	812	837	754	666	686	741	719	989.963	855.209	860.054	747.727	688.215	707.416	656.571	742.081	Down Regulated
ENSG00000134690	ENSG00000134690.11	CDCA8	37692481	37709719	1	mRNA	cell division cycle associated 8 [Source:HGNC Symbol;Acc:HGNC:14629]	364.305	-0.568026	0.176989	6.7e-05	0.00259857	525	326	500	283	233	208	221	245	289.543	343.347	513.772	280.645	240.772	214.493	195.819	252.865	Down Regulated
ENSG00000106144	ENSG00000106144.20	CASP2	143288215	143307696	1	mRNA	caspase 2 [Source:HGNC Symbol;Acc:HGNC:1503]	1385.1	-0.294332	0.0856555	6.7e-05	0.00259857	2176	950	1316	855	848	848	941	894	1200.09	1000.55	1352.25	847.886	876.286	874.473	833.783	922.699	Down Regulated
ENSG00000136153	ENSG00000136153.20	LMO7	75620434	75859870	1	mRNA	LIM domain 7 [Source:HGNC Symbol;Acc:HGNC:6646]	453.97	-0.32035	0.0951007	6.73e-05	0.00260275	1075	477	435	403	414	322	437	360	592.875	502.383	446.981	399.647	427.81	332.052	387.208	371.557	Down Regulated
ENSG00000151474	ENSG00000151474.23	FRMD4A	13643706	14462142	-1	mRNA	FERM domain containing 4A [Source:HGNC Symbol;Acc:HGNC:25491]	1043.26	0.318232	0.0937652	6.83e-05	0.00263251	1287	703	710	875	958	973	1084	921	709.795	740.409	729.556	867.72	989.956	1003.38	960.489	950.566	Up Regulated
ENSG00000228716	ENSG00000228716.7	DHFR	80626226	80654983	-1	mRNA	dihydrofolate reductase [Source:HGNC Symbol;Acc:HGNC:2861]	1298.83	-0.433181	0.132146	6.85e-05	0.00263693	3232	1799	2264	1311	1296	1196	1406	1318	1782.48	1894.73	2326.36	1300.09	1339.23	1233.34	1245.8	1360.31	Down Regulated
ENSG00000196584	ENSG00000196584.3	XRCC2	152644776	152676141	-1	mRNA	X-ray repair cross complementing 2 [Source:HGNC Symbol;Acc:HGNC:12829]	560.074	-0.461836	0.141924	6.98e-05	0.00267326	1385	649	933	501	481	479	556	511	763.843	683.535	958.698	496.832	497.044	493.954	492.649	527.404	Down Regulated
ENSG00000224584	ENSG00000224584.2	UBE2V1P13	214612960	214613398	-1	mRNA	UBE2V1 pseudogene 13 [Source:HGNC Symbol;Acc:HGNC:52411]	25.4566	-1.10067	0.345419	6.98e-05	0.00267326	67	23	21	15	9	9	11	13	36.9513	24.2239	21.5784	14.8752	9.30021	9.28096	9.74666	13.4173	Down Regulated
ENSG00000162631	ENSG00000162631.18	NTNG1	107140007	107484923	1	mRNA	netrin G1 [Source:HGNC Symbol;Acc:HGNC:23319]	116.154	-0.702483	0.221848	6.99e-05	0.00267326	95	84	81	33	35	33	40	37	52.3936	88.4699	83.231	32.7254	36.1675	34.0302	35.4424	38.1878	Down Regulated
ENSG00000072210	ENSG00000072210.18	ALDH3A2	19648136	19685760	1	mRNA	aldehyde dehydrogenase 3 family member A2 [Source:HGNC Symbol;Acc:HGNC:403]	670.097	0.283827	0.0825606	7.01e-05	0.00267438	1223	654	598	908	807	885	1027	898	674.498	688.801	614.471	900.445	833.919	912.628	909.984	926.827	Up Regulated
ENSG00000253558	ENSG00000253558.1		78041888	78044136	-1	mRNA	heat shock protein 90 alpha family class B member 1 pseudogene	56.6016	-0.829384	0.256047	7.02e-05	0.00267438	79	25	50	30	21	17	23	19	43.5694	26.3303	51.3772	29.7504	21.7005	17.5307	20.3794	19.6099	Down Regulated
ENSG00000170525	ENSG00000170525.21	PFKFB3	6144934	6254644	1	mRNA	6-phosphofructo-2-kinase/fructose-2,6-biphosphatase 3 [Source:HGNC Symbol;Acc:HGNC:8874]	1262.84	0.319632	0.0944856	7.09e-05	0.00269805	1031	558	459	648	722	743	838	641	568.608	587.693	471.643	642.609	746.083	766.195	742.518	661.577	Up Regulated
ENSG00000183943	ENSG00000183943.5	PRKX	3604340	3713649	-1	mRNA	protein kinase X-linked [Source:HGNC Symbol;Acc:HGNC:9441]	891.576	0.217915	0.0613164	7.15e-05	0.00271326	1311	865	903	1017	1035	1035	1133	1013	723.031	911.029	927.872	1008.54	1069.52	1067.31	1003.91	1045.52	Up Regulated
ENSG00000138180	ENSG00000138180.15	CEP55	93496612	93529092	1	mRNA	centrosomal protein 55 [Source:HGNC Symbol;Acc:HGNC:1161]	452.043	-0.584691	0.183713	7.26e-05	0.0027505	799	455	515	232	266	225	276	290	440.657	479.212	529.185	230.07	274.873	232.024	244.553	299.309	Down Regulated
ENSG00000090889	ENSG00000090889.12	KIF4A	70290104	70420886	1	mRNA	kinesin family member 4A [Source:HGNC Symbol;Acc:HGNC:13339]	495.621	-0.527307	0.164848	7.4e-05	0.00279663	842	532	765	348	367	284	411	363	464.372	560.309	786.071	345.105	379.242	292.866	364.171	374.653	Down Regulated
ENSG00000123119	ENSG00000123119.12	NECAB1	90791741	90959393	1	mRNA	N-terminal EF-hand calcium binding protein 1 [Source:HGNC Symbol;Acc:HGNC:20983]	88.2235	-0.589985	0.184694	7.42e-05	0.00279663	152	59	86	61	56	43	50	38	83.8297	62.1396	88.3688	60.4925	57.868	44.3424	44.303	39.2199	Down Regulated
ENSG00000116701	ENSG00000116701.14	NCF2	183555562	183590876	-1	mRNA	neutrophil cytosolic factor 2 [Source:HGNC Symbol;Acc:HGNC:7661]	2830.86	0.298168	0.0877029	7.42e-05	0.00279663	6023	3625	3456	5015	4848	4576	5661	4853	3321.75	3817.9	3551.19	4973.28	5009.71	4718.85	5015.99	5008.79	Up Regulated
ENSG00000184182	ENSG00000184182.18	UBE2F	237966827	238042782	1	mRNA	ubiquitin conjugating enzyme E2 F (putative) [Source:HGNC Symbol;Acc:HGNC:12480]	433.264	0.287618	0.0843971	7.43e-05	0.00279663	523	366	318	427	436	420	482	439	288.44	385.476	326.759	423.447	450.543	433.112	427.081	453.093	Up Regulated
ENSG00000136478	ENSG00000136478.7	TEX2	64147227	64263260	-1	mRNA	testis expressed 2 [Source:HGNC Symbol;Acc:HGNC:30884]	4416.83	0.20951	0.058793	7.59e-05	0.00284573	7870	4429	4329	5155	5199	5216	6164	5377	4340.39	4664.68	4448.24	5112.11	5372.42	5378.83	5461.67	5549.61	Up Regulated
ENSG00000171246	ENSG00000171246.6	NPTX1	80466834	80477843	-1	mRNA	neuronal pentraxin 1 [Source:HGNC Symbol;Acc:HGNC:7952]	1340.05	1.15316	0.375023	7.59e-05	0.00284573	742	306	208	1432	1532	1532	1642	1373	409.221	322.283	213.729	1420.09	1583.1	1579.83	1454.91	1417.08	Up Regulated
ENSG00000166508	ENSG00000166508.17	MCM7	100092728	100101940	-1	mRNA	minichromosome maintenance complex component 7 [Source:HGNC Symbol;Acc:HGNC:6950]	3116.44	-0.528219	0.165712	7.69e-05	0.00287815	7251	3190	4046	2488	2040	2263	2519	2409	3999.01	3359.75	4157.44	2467.3	2108.05	2333.65	2231.99	2486.33	Down Regulated
ENSG00000163535	ENSG00000163535.18	SGO2	200510008	200584096	1	mRNA	shugoshin 2 [Source:HGNC Symbol;Acc:HGNC:30812]	542.589	-0.457061	0.141729	7.73e-05	0.00288432	950	596	753	441	444	334	481	396	523.936	627.715	773.74	437.331	458.81	344.427	426.195	408.712	Down Regulated
ENSG00000058335	ENSG00000058335.15	RASGRF1	78959906	79090780	-1	mRNA	Ras protein specific guanine nucleotide releasing factor 1 [Source:HGNC Symbol;Acc:HGNC:9875]	444.468	0.429413	0.13258	7.74e-05	0.00288432	548	426	504	594	592	676	719	634	302.228	448.669	517.882	589.058	611.747	697.104	637.077	654.352	Up Regulated
ENSG00000168874	ENSG00000168874.13	ATOH8	85751344	85791383	1	mRNA	atonal bHLH transcription factor 8 [Source:HGNC Symbol;Acc:HGNC:24126]	28.4477	-1.16431	0.374331	7.79e-05	0.00289924	180	20	51	23	15	23	25	16	99.272	21.0643	52.4047	22.8086	15.5003	23.718	22.1515	16.5136	Down Regulated
ENSG00000101057	ENSG00000101057.16	MYBL2	43667019	43716495	1	mRNA	MYB proto-oncogene like 2 [Source:HGNC Symbol;Acc:HGNC:7548]	2309.62	-0.752147	0.241725	7.86e-05	0.00292008	4389	2160	3131	1431	1076	1178	1425	1444	2420.58	2274.94	3217.24	1419.09	1111.89	1214.78	1262.64	1490.35	Down Regulated
ENSG00000147852	ENSG00000147852.16	VLDLR	2621182	2660056	1	mRNA	very low density lipoprotein receptor [Source:HGNC Symbol;Acc:HGNC:12698]	1357.61	0.433752	0.134352	8e-05	0.00295588	689	386	493	718	672	730	836	616	379.991	406.54	506.579	712.026	694.416	752.789	740.746	635.775	Up Regulated
ENSG00000049759	ENSG00000049759.18	NEDD4L	58044226	58401540	1	mRNA	NEDD4 like E3 ubiquitin protein ligase [Source:HGNC Symbol;Acc:HGNC:7728]	405.966	-0.530289	0.164896	8.02e-05	0.00295588	840	297	350	210	232	220	232	209	463.269	312.804	359.64	208.253	239.739	226.868	205.566	215.709	Down Regulated
ENSG00000235750	ENSG00000235750.10	KIAA0040	175156986	175192999	-1	mRNA	KIAA0040 [Source:HGNC Symbol;Acc:HGNC:28950]	657.911	-0.30465	0.0903935	8.03e-05	0.00295588	1777	915	874	696	664	706	775	667	980.035	963.69	898.073	690.209	686.149	728.04	686.697	688.412	Down Regulated
ENSG00000153936	ENSG00000153936.17	HS2ST1	86914635	87109982	1	mRNA	heparan sulfate 2-O-sulfotransferase 1 [Source:HGNC Symbol;Acc:HGNC:5193]	4662.9	0.460664	0.14347	8.03e-05	0.00295588	3405	4713	3882	5201	5817	5624	6616	5238	1877.9	4963.79	3988.92	5157.73	6011.03	5799.57	5862.17	5406.15	Up Regulated
ENSG00000084070	ENSG00000084070.12	SMAP2	40344850	40423326	1	mRNA	small ArfGAP2 [Source:HGNC Symbol;Acc:HGNC:25082]	24857.7	0.169718	0.046574	8.16e-05	0.002999	35724	18433	19338	20844	21237	22520	25756	21759	19702.2	19413.9	19870.6	20670.6	21945.4	23223	22821.4	22457.5	Up Regulated
ENSG00000278588	ENSG00000278588.1	H2BC10	26272931	26273412	1	mRNA	H2B clustered histone 10 [Source:HGNC Symbol;Acc:HGNC:4756]	712.574	-1.04163	0.340424	8.19e-05	0.003003	1392	959	1167	432	335	315	403	418	767.704	1010.03	1199.14	428.406	346.174	324.834	357.082	431.418	Down Regulated
ENSG00000123130	ENSG00000123130.17	ACOT9	23701055	23766475	-1	mRNA	acyl-CoA thioesterase 9 [Source:HGNC Symbol;Acc:HGNC:17152]	608.285	0.253347	0.0735454	8.21e-05	0.0030032	1077	564	569	697	768	656	873	726	593.978	594.012	584.672	691.201	793.618	676.479	773.53	749.306	Up Regulated
ENSG00000156968	ENSG00000156968.9	MPV17L	15395754	15413271	1	mRNA	MPV17 mitochondrial inner membrane protein like [Source:HGNC Symbol;Acc:HGNC:26827]	70.222	0.533523	0.168847	8.23e-05	0.00300481	109	67	78	81	118	103	131	94	60.1147	70.5653	80.1484	80.3261	121.936	106.215	116.074	97.0176	Up Regulated
ENSG00000065833	ENSG00000065833.9	ME1	83210402	83431051	-1	mRNA	malic enzyme 1 [Source:HGNC Symbol;Acc:HGNC:6983]	1146.67	0.395168	0.121351	8.29e-05	0.0030249	1485	494	562	873	839	931	1107	979	818.994	520.287	577.48	865.737	866.986	960.064	980.869	1010.43	Up Regulated
ENSG00000099219	ENSG00000099219.14	ERMP1	5749832	5879537	-1	mRNA	endoplasmic reticulum metallopeptidase 1 [Source:HGNC Symbol;Acc:HGNC:23703]	7376.63	0.223184	0.0636247	8.32e-05	0.003027	13057	7130	7216	9121	8882	8926	10447	9037	7201.08	7509.41	7414.76	9045.11	9178.27	9204.65	9256.67	9327.1	Up Regulated
ENSG00000159592	ENSG00000159592.11	GPBP1L1	45627304	45688113	-1	mRNA	GC-rich promoter binding protein 1 like 1 [Source:HGNC Symbol;Acc:HGNC:28843]	6467.54	0.168968	0.0464818	8.49e-05	0.00308274	11111	6565	6193	7515	7478	7410	8615	7224	6127.84	6914.34	6363.58	7452.48	7727.44	7641.33	7633.41	7455.9	Up Regulated
ENSG00000146143	ENSG00000146143.18	PRIM2	57314805	57646850	1	mRNA	DNA primase subunit 2 [Source:HGNC Symbol;Acc:HGNC:9370]	861.933	-0.300924	0.0895976	8.5e-05	0.00308274	1884	908	1179	783	782	719	897	781	1039.05	956.317	1211.47	776.485	808.085	741.446	794.796	806.071	Down Regulated
ENSG00000090104	ENSG00000090104.12	RGS1	192575763	192580024	1	mRNA	regulator of G protein signaling 1 [Source:HGNC Symbol;Acc:HGNC:9991]	24816.8	0.515291	0.162973	8.54e-05	0.00309284	31196	27991	18791	40477	42945	39625	44442	34780	17204.9	29480.5	19308.6	40140.2	44377.5	40862	39378.3	35896.5	Up Regulated
ENSG00000114742	ENSG00000114742.14	WDR48	39052013	39096671	1	mRNA	WD repeat domain 48 [Source:HGNC Symbol;Acc:HGNC:30914]	732.394	0.227041	0.0651325	8.66e-05	0.00312986	1157	653	639	791	814	737	925	835	638.098	687.748	656.6	784.419	841.152	760.008	819.606	861.805	Up Regulated
ENSG00000138798	ENSG00000138798.12	EGF	109912883	110013766	1	mRNA	epidermal growth factor [Source:HGNC Symbol;Acc:HGNC:3229]	42.776	0.59951	0.192942	8.71e-05	0.00313834	60	42	47	76	74	89	82	75	33.0907	44.2349	48.2946	75.3677	76.4684	91.7784	72.6569	77.4076	Up Regulated
ENSG00000110066	ENSG00000110066.15	KMT5B	68154863	68213828	-1	mRNA	lysine methyltransferase 5B [Source:HGNC Symbol;Acc:HGNC:24283]	1253.14	0.255057	0.0744444	8.74e-05	0.00314187	1853	1094	1007	1436	1400	1334	1590	1357	1021.95	1152.21	1034.74	1424.05	1446.7	1375.65	1408.84	1400.56	Up Regulated
ENSG00000163536	ENSG00000163536.12	SERPINI1	167735243	167825569	1	mRNA	serpin family I member 1 [Source:HGNC Symbol;Acc:HGNC:8943]	699.957	0.597987	0.191804	8.76e-05	0.0031424	1101	748	746	1538	1452	1435	1700	1434	607.214	787.803	766.548	1525.2	1500.43	1479.8	1506.3	1480.03	Up Regulated
ENSG00000179630	ENSG00000179630.11	LACC1	43879284	43893932	1	mRNA	laccase domain containing 1 [Source:HGNC Symbol;Acc:HGNC:26789]	4043.99	0.490996	0.155113	8.82e-05	0.00315826	5168	2409	2143	3692	3971	4045	4831	4000	2850.21	2537.19	2202.03	3661.28	4103.46	4171.28	4280.56	4128.41	Up Regulated
ENSG00000113240	ENSG00000113240.13	CLK4	178602664	178630615	-1	mRNA	CDC like kinase 4 [Source:HGNC Symbol;Acc:HGNC:13659]	686.322	0.302449	0.090498	8.9e-05	0.00318271	1264	620	653	878	910	859	1064	866	697.11	652.992	670.986	870.695	940.354	885.816	942.768	893.8	Up Regulated
ENSG00000106799	ENSG00000106799.13	TGFBR1	99104038	99154192	1	mRNA	transforming growth factor beta receptor 1 [Source:HGNC Symbol;Acc:HGNC:11772]	11646.1	0.330265	0.100033	8.94e-05	0.00319201	22545	15276	14772	20192	20694	19030	23430	20224	12433.8	16088.9	15178.9	20024	21384.3	19624.1	20760.4	20873.2	Up Regulated
ENSG00000111665	ENSG00000111665.11	CDCA3	6844793	6851292	-1	mRNA	cell division cycle associated 3 [Source:HGNC Symbol;Acc:HGNC:14624]	162.867	-0.584208	0.187964	8.97e-05	0.00319484	210	188	222	114	109	107	80	109	115.817	198.004	228.115	113.052	112.636	110.34	70.8848	112.499	Down Regulated
ENSG00000161800	ENSG00000161800.13	RACGAP1	49976923	50033136	-1	mRNA	Rac GTPase activating protein 1 [Source:HGNC Symbol;Acc:HGNC:9804]	581.172	-0.48237	0.152518	9e-05	0.00319994	1010	689	840	486	400	404	514	481	557.026	725.664	863.137	481.956	413.343	416.612	455.435	496.441	Down Regulated
ENSG00000187837	ENSG00000187837.3	H1-2	26055740	26056470	-1	mRNA	H1.2 linker histone, cluster member [Source:HGNC Symbol;Acc:HGNC:4716]	3578.53	-0.731947	0.238316	9.04e-05	0.00320894	8729	6126	7075	3554	2880	2943	3332	3119	4814.14	6451.98	7269.87	3524.43	2976.07	3034.88	2952.35	3219.13	Down Regulated
ENSG00000086061	ENSG00000086061.16	DNAJA1	33025273	33039907	1	mRNA	DnaJ heat shock protein family (Hsp40) member A1 [Source:HGNC Symbol;Acc:HGNC:5229]	4513.6	-0.332546	0.100913	9.06e-05	0.00321203	10288	5027	4987	3759	3759	3585	4314	3737	5673.95	5294.5	5124.36	3727.73	3884.39	3696.92	3822.46	3856.96	Down Regulated
ENSG00000197121	ENSG00000197121.15	PGAP1	196833004	196927796	-1	mRNA	post-GPI attachment to proteins inositol deacylase 1 [Source:HGNC Symbol;Acc:HGNC:25712]	291.803	-0.406896	0.126299	9.16e-05	0.00324079	533	219	287	195	170	168	224	183	293.955	230.654	294.905	193.378	175.671	173.245	198.477	188.875	Down Regulated
ENSG00000149243	ENSG00000149243.15	KLHL35	75422394	75433203	-1	mRNA	kelch like family member 35 [Source:HGNC Symbol;Acc:HGNC:26597]	85.8947	0.588072	0.188982	9.22e-05	0.00325842	127	73	52	84	103	87	149	123	70.0419	76.8845	53.4323	83.3011	106.436	89.716	132.023	126.949	Up Regulated
ENSG00000121966	ENSG00000121966.6	CXCR4	136114349	136119177	-1	mRNA	C-X-C motif chemokine receptor 4 [Source:HGNC Symbol;Acc:HGNC:2561]	274.899	0.731452	0.242673	9.55e-05	0.00336726	440	168	286	538	516	581	629	563	242.665	176.94	293.877	533.524	533.212	599.138	557.332	581.073	Up Regulated
ENSG00000243335	ENSG00000243335.9	KCTD7	66628881	66649067	1	mRNA	potassium channel tetramerization domain containing 7 [Source:HGNC Symbol;Acc:HGNC:21957]	311.753	0.340159	0.104247	9.67e-05	0.00340467	477	276	261	365	372	404	436	344	263.071	290.687	268.189	361.963	384.409	416.612	386.322	355.043	Up Regulated
ENSG00000100162	ENSG00000100162.15	CENPM	41938737	41947152	-1	mRNA	centromere protein M [Source:HGNC Symbol;Acc:HGNC:18352]	192.736	-0.683553	0.223223	9.69e-05	0.00340637	387	194	293	151	124	106	133	139	213.435	204.323	301.07	149.744	128.136	109.309	117.846	143.462	Down Regulated
ENSG00000258445	ENSG00000258445.3	MAD2L1P1	60779978	60780595	1	mRNA	mitotic arrest deficient 2 like 1 pseudogene 1 [Source:HGNC Symbol;Acc:HGNC:20019]	135.659	-0.537914	0.17681	9.96e-05	0.00349376	334	206	229	131	147	92	137	120	184.205	216.962	235.307	129.91	151.903	94.8721	121.39	123.852	Down Regulated
ENSG00000108468	ENSG00000108468.15	CBX1	48070052	48101478	-1	mRNA	chromobox 1 [Source:HGNC Symbol;Acc:HGNC:1551]	1002.12	-0.286904	0.0860554	0.000100181	0.00350416	2171	995	1260	932	850	838	998	916	1197.33	1047.95	1294.71	924.246	878.353	864.161	884.288	945.405	Down Regulated
ENSG00000142178	ENSG00000142178.8	SIK1	43414483	43427131	-1	mRNA	salt inducible kinase 1 [Source:HGNC Symbol;Acc:HGNC:11142]	14.8491	0.926905	0.306045	0.000100232	0.00350416	39	15	19	25	29	50	45	52	21.5089	15.7982	19.5233	24.792	29.9673	51.5609	39.8727	53.6693	Up Regulated
ENSG00000185420	ENSG00000185420.19	SMYD3	245749342	246507312	-1	mRNA	SET and MYND domain containing 3 [Source:HGNC Symbol;Acc:HGNC:15513]	2029.68	0.31036	0.0942186	0.000100849	0.00351968	4483	2126	2323	3288	3255	3156	3712	3211	2472.42	2239.13	2386.98	3260.64	3363.58	3254.52	3289.06	3314.08	Up Regulated
ENSG00000151694	ENSG00000151694.13	ADAM17	9488486	9556732	-1	mRNA	ADAM metallopeptidase domain 17 [Source:HGNC Symbol;Acc:HGNC:195]	7102.91	0.262259	0.0778502	0.000102599	0.00357459	9940	6926	6349	7625	7913	8076	9430	7806	5482.02	7294.55	6523.87	7561.56	8176.95	8328.12	8355.55	8056.59	Up Regulated
ENSG00000164430	ENSG00000164430.16	CGAS	73413515	73452297	-1	mRNA	cyclic GMP-AMP synthase [Source:HGNC Symbol;Acc:HGNC:21367]	849.857	-0.406439	0.127844	0.00010306	0.00357716	1872	935	935	718	676	642	756	620	1032.43	984.754	960.753	712.026	698.549	662.042	669.861	639.903	Down Regulated
ENSG00000172243	ENSG00000172243.17	CLEC7A	10116777	10130258	-1	mRNA	C-type lectin domain containing 7A [Source:HGNC Symbol;Acc:HGNC:14558]	570.415	-0.815793	0.270624	0.000103092	0.00357716	4341	706	1014	707	583	606	643	694	2394.11	743.568	1041.93	701.118	602.447	624.918	569.737	716.279	Down Regulated
ENSG00000233369	ENSG00000233369.7	GTF2IP4	73154938	73207283	1	mRNA	general transcription factor IIi pseudogene 4 [Source:HGNC Symbol;Acc:HGNC:51716]	87.3402	0.537723	0.171494	0.000103201	0.00357716	104	62	70	85	96	91	122	118	57.3572	65.2992	71.9281	84.2928	99.2022	93.8409	108.099	121.788	Up Regulated
ENSG00000112877	ENSG00000112877.8	CEP72	612340	667168	1	mRNA	centrosomal protein 72 [Source:HGNC Symbol;Acc:HGNC:25547]	223.579	-0.507031	0.162393	0.000104162	0.00360434	244	87	121	79	81	65	66	79	134.569	91.6295	124.333	78.3427	83.7019	67.0292	58.48	81.536	Down Regulated
ENSG00000196581	ENSG00000196581.10	AJAP1	4654609	4792534	1	mRNA	adherens junctions associated protein 1 [Source:HGNC Symbol;Acc:HGNC:30801]	51.3324	1.07075	0.351997	0.000104518	0.00361048	24	3	8	15	19	24	33	24	13.2363	3.15964	8.22035	14.8752	19.6338	24.7492	29.24	24.7704	Up Regulated
ENSG00000179981	ENSG00000179981.10	TSHZ1	75210755	75289950	1	mRNA	teashirt zinc finger homeobox 1 [Source:HGNC Symbol;Acc:HGNC:10669]	691.726	0.385304	0.120954	0.000105218	0.00362236	674	552	486	662	666	700	817	696	371.719	581.374	499.386	656.492	688.215	721.853	723.911	718.343	Up Regulated
ENSG00000147724	ENSG00000147724.12	FAM135B	138130023	138497261	-1	mRNA	family with sequence similarity 135 member B [Source:HGNC Symbol;Acc:HGNC:28029]	424.24	0.484892	0.156169	0.000105841	0.0036371	358	406	284	476	480	528	599	452	197.441	427.604	291.822	472.04	496.011	544.483	530.75	466.51	Up Regulated
ENSG00000183935	ENSG00000183935.5	HTR7P1	13000420	13004830	1	mRNA	5-hydroxytryptamine receptor 7 pseudogene 1 [Source:HGNC Symbol;Acc:HGNC:30411]	260.789	0.340877	0.105617	0.000106005	0.0036371	318	224	212	348	302	303	368	298	175.381	235.92	217.839	345.105	312.074	312.459	326.07	307.566	Up Regulated
ENSG00000257199	ENSG00000257199.2		76984079	76984669	-1	mRNA	RAN binding protein 1 (RANBP1) pseudogene	35.4757	-0.731436	0.24022	0.000107333	0.00367646	99	53	57	35	20	27	37	30	54.5996	55.8203	58.57	34.7088	20.6671	27.8429	32.7842	30.963	Down Regulated
ENSG00000235376	ENSG00000235376.5	RPEL1	103245887	103248016	1	mRNA	ribulose-5-phosphate-3-epimerase like 1 [Source:HGNC Symbol;Acc:HGNC:45241]	273.844	-0.29947	0.0930918	0.000108525	0.00371103	664	316	307	287	233	246	285	273	366.203	332.815	315.456	284.612	240.772	253.68	252.527	281.764	Down Regulated
ENSG00000107581	ENSG00000107581.13	EIF3A	119033670	119080823	-1	mRNA	eukaryotic translation initiation factor 3 subunit A [Source:HGNC Symbol;Acc:HGNC:3271]	8190.18	0.185773	0.0527055	0.000109082	0.00372381	10895	5588	6132	6751	6638	7031	7844	7347	6008.71	5885.35	6300.9	6694.83	6859.42	7250.5	6950.26	7582.85	Up Regulated
ENSG00000164032	ENSG00000164032.12	H2AZ1	99948086	99950355	-1	mRNA	H2A.Z variant histone 1 [Source:HGNC Symbol;Acc:HGNC:4741]	4825.18	-0.375405	0.117818	0.000110303	0.0037592	9030	6616	7200	4324	4250	4086	4989	4358	4980.15	6968.06	7398.31	4288.02	4391.77	4213.56	4420.55	4497.9	Down Regulated
ENSG00000152804	ENSG00000152804.11	HHEX	92689955	92695647	1	mRNA	hematopoietically expressed homeobox [Source:HGNC Symbol;Acc:HGNC:4901]	333.901	0.311676	0.0957645	0.000110661	0.00376507	450	386	300	404	422	416	498	402	248.18	406.54	308.263	400.639	436.076	428.987	441.258	414.905	Up Regulated
ENSG00000185379	ENSG00000185379.20	RAD51D	35092221	35121522	-1	mRNA	RAD51 paralog D [Source:HGNC Symbol;Acc:HGNC:9823]	539.665	-0.274272	0.0829918	0.000112597	0.00382452	1008	521	623	451	434	379	536	438	555.923	548.724	640.16	447.248	448.477	390.832	474.928	452.061	Down Regulated
ENSG00000259781	ENSG00000259781.1	HMGB1P6	71164770	71165415	-1	mRNA	high mobility group box 1 pseudogene 6 [Source:HGNC Symbol;Acc:HGNC:4998]	668.646	-0.327967	0.10134	0.000112799	0.00382499	1634	897	1057	679	692	712	761	638	901.169	944.732	1086.11	673.351	715.083	734.227	674.292	658.481	Down Regulated
ENSG00000179348	ENSG00000179348.11	GATA2	128479427	128493201	-1	mRNA	GATA binding protein 2 [Source:HGNC Symbol;Acc:HGNC:4171]	168.665	0.664443	0.220573	0.000113146	0.00382522	132	90	66	138	154	151	193	145	72.7995	94.7892	67.8179	136.852	159.137	155.714	171.01	149.655	Up Regulated
ENSG00000006634	ENSG00000006634.8	DBF4	87876216	87909553	1	mRNA	DBF4 zinc finger [Source:HGNC Symbol;Acc:HGNC:17364]	495.385	-0.313916	0.0964353	0.000113182	0.00382522	1051	601	636	538	452	469	555	415	579.638	632.981	653.518	533.524	467.077	483.641	491.763	428.322	Down Regulated
ENSG00000274618	ENSG00000274618.1	H4C6	26240393	26240793	1	mRNA	H4 clustered histone 6 [Source:HGNC Symbol;Acc:HGNC:4783]	1263.96	-0.711521	0.237491	0.000115935	0.00391176	3223	2119	2497	1277	962	1055	1271	1142	1777.52	2231.76	2565.78	1266.38	994.089	1087.94	1126.18	1178.66	Down Regulated
ENSG00000178184	ENSG00000178184.16	PARD6G	80157232	80247514	-1	mRNA	par-6 family cell polarity regulator gamma [Source:HGNC Symbol;Acc:HGNC:16076]	131.419	-0.514466	0.167139	0.000116949	0.00393346	266	98	145	108	74	94	102	70	146.702	103.215	148.994	107.101	76.4684	96.9345	90.3781	72.2471	Down Regulated
ENSG00000138433	ENSG00000138433.16	CIR1	174348022	174395712	-1	mRNA	corepressor interacting with RBPJ, CIR1 [Source:HGNC Symbol;Acc:HGNC:24217]	589.274	0.294873	0.09016	0.000116966	0.00393346	911	543	529	736	751	762	755	698	502.427	571.895	543.571	729.877	776.051	785.788	668.975	720.407	Up Regulated
ENSG00000163814	ENSG00000163814.8	CDCP1	45082277	45146422	-1	mRNA	CUB domain containing protein 1 [Source:HGNC Symbol;Acc:HGNC:24357]	441.087	0.474802	0.154206	0.000117413	0.00394196	291	234	188	333	317	338	371	339	160.49	246.452	193.178	330.229	327.574	348.552	328.728	349.882	Up Regulated
ENSG00000140450	ENSG00000140450.9	ARRDC4	97960703	97973833	1	mRNA	arrestin domain containing 4 [Source:HGNC Symbol;Acc:HGNC:28087]	1972.67	0.354885	0.111349	0.000118828	0.00398289	4795	2434	2199	3512	3527	3577	4144	3407	2644.5	2563.52	2259.57	3482.78	3644.65	3688.67	3671.83	3516.37	Up Regulated
ENSG00000263606	ENSG00000263606.1	CHORDC1P4	2945550	2946890	-1	mRNA	CHORDC1 pseudogene 4 [Source:HGNC Symbol;Acc:HGNC:54688]	253.204	-0.339945	0.105992	0.000119042	0.00398349	515	272	295	236	207	233	226	187	284.028	286.474	303.125	234.036	213.905	240.274	200.25	193.003	Down Regulated
ENSG00000102098	ENSG00000102098.18	SCML2	18239313	18354688	-1	mRNA	Scm polycomb group protein like 2 [Source:HGNC Symbol;Acc:HGNC:10581]	81.007	-0.642913	0.211669	0.000119351	0.00398725	145	69	85	57	33	42	61	43	79.9691	72.6717	87.3412	56.5258	34.1008	43.3112	54.0497	44.3804	Down Regulated
ENSG00000218502	ENSG00000218502.3	H2AZP3	99215372	99215758	-1	mRNA	H2A.Z histone pseudogene 3 [Source:HGNC Symbol;Acc:HGNC:38013]	578.824	-0.393853	0.125873	0.000124861	0.00416198	923	622	654	416	360	411	465	416	509.045	655.098	672.014	412.539	372.008	423.831	412.018	429.354	Down Regulated
ENSG00000140479	ENSG00000140479.17	PCSK6	101289784	101525202	-1	mRNA	proprotein convertase subtilisin/kexin type 6 [Source:HGNC Symbol;Acc:HGNC:8569]	2355.76	0.524051	0.172585	0.000124991	0.00416198	1508	1707	1287	2229	2350	2375	2614	2151	831.679	1797.83	1322.45	2210.45	2428.39	2449.14	2316.16	2220.05	Up Regulated
ENSG00000174748	ENSG00000174748.20	RPL15	23916591	23924374	1	mRNA	ribosomal protein L15 [Source:HGNC Symbol;Acc:HGNC:10306]	11274.1	0.232985	0.0691264	0.000126121	0.00418254	21744	14516	12441	16581	16345	16274	19267	16366	11992.1	15288.4	12783.7	16443	16890.2	16782	17071.7	16891.4	Up Regulated
ENSG00000138061	ENSG00000138061.12	CYP1B1	38066973	38109902	-1	mRNA	cytochrome P450 family 1 subfamily B member 1 [Source:HGNC Symbol;Acc:HGNC:2597]	2505.27	1.2681	0.436824	0.000126213	0.00418254	1848	697	651	5593	5455	5146	6507	5759	1019.19	734.089	668.931	5546.47	5636.96	5306.65	5765.59	5943.87	Up Regulated
ENSG00000171940	ENSG00000171940.13	ZNF217	53567071	53609907	-1	mRNA	zinc finger protein 217 [Source:HGNC Symbol;Acc:HGNC:13009]	3425.73	0.207315	0.060433	0.000126226	0.00418254	5684	2765	3012	3461	3497	3662	4155	3552	3134.79	2912.13	3094.96	3432.2	3613.65	3776.32	3681.58	3666.03	Up Regulated
ENSG00000096060	ENSG00000096060.14	FKBP5	35573585	35728583	-1	mRNA	FKBP prolyl isomerase 5 [Source:HGNC Symbol;Acc:HGNC:3721]	727.362	-0.388249	0.123868	0.000126466	0.00418367	1649	676	958	579	496	513	697	654	909.442	711.972	984.387	574.183	512.545	529.015	617.584	674.994	Down Regulated
ENSG00000135503	ENSG00000135503.13	ACVR1B	51951699	51997078	1	mRNA	activin A receptor type 1B [Source:HGNC Symbol;Acc:HGNC:172]	515.196	0.266466	0.0827252	0.000128933	0.00425837	765	480	391	513	508	530	657	592	421.906	505.542	401.77	508.732	524.945	546.546	582.141	611.004	Up Regulated
ENSG00000123066	ENSG00000123066.8	MED13L	115957905	116277693	-1	mRNA	mediator complex subunit 13L [Source:HGNC Symbol;Acc:HGNC:22962]	10766.6	0.203402	0.0592797	0.000129993	0.00428639	13892	8972	9259	10641	10970	10627	12029	10126	7661.59	9449.43	9514.03	10552.5	11335.9	10958.8	10658.4	10451.1	Up Regulated
ENSG00000164935	ENSG00000164935.6	DCSTAMP	104339087	104356689	1	mRNA	dendrocyte expressed seven transmembrane protein [Source:HGNC Symbol;Acc:HGNC:18549]	360.219	0.696491	0.235965	0.00013177	0.00433148	127	102	75	181	177	191	225	177	70.0419	107.428	77.0658	179.494	182.904	196.963	199.364	182.682	Up Regulated
ENSG00000239672	ENSG00000239672.7	NME1	51153559	51162428	1	mRNA	NME/NM23 nucleoside diphosphate kinase 1 [Source:HGNC Symbol;Acc:HGNC:7849]	844.892	-0.295569	0.0892376	0.000131787	0.00433148	2276	915	863	838	793	760	826	790	1255.24	963.69	886.77	831.028	819.452	783.726	731.886	815.36	Down Regulated
ENSG00000164053	ENSG00000164053.21	ATRIP	48446710	48467645	1	mRNA	ATR interacting protein [Source:HGNC Symbol;Acc:HGNC:33499]	245.336	-0.357319	0.113098	0.000132148	0.00433633	615	250	318	242	220	190	250	233	339.179	263.303	326.759	239.987	227.338	195.931	221.515	240.48	Down Regulated
ENSG00000100473	ENSG00000100473.17	COCH	30874514	30895065	1	mRNA	cochlin [Source:HGNC Symbol;Acc:HGNC:2180]	82.5555	-0.496206	0.165662	0.000132638	0.00434538	293	107	117	104	77	80	86	95	161.593	112.694	120.223	103.135	79.5685	82.4975	76.2012	98.0497	Down Regulated
ENSG00000185640	ENSG00000185640.5	KRT79	52821408	52834311	-1	mRNA	keratin 79 [Source:HGNC Symbol;Acc:HGNC:28930]	24.0373	1.1973	0.41822	0.000134845	0.00441058	5	16	7	40	41	37	46	49	2.75756	16.8514	7.19281	39.6672	42.3676	38.1551	40.7588	50.573	Up Regulated
ENSG00000160179	ENSG00000160179.18	ABCG1	42199689	42297244	1	mRNA	ATP binding cassette subfamily G member 1 [Source:HGNC Symbol;Acc:HGNC:73]	215.093	0.763912	0.258678	0.000135112	0.00441222	308	293	297	497	560	548	698	591	169.865	308.591	305.18	492.865	578.68	565.108	618.47	609.972	Up Regulated
ENSG00000117586	ENSG00000117586.11	TNFSF4	173183731	173207331	-1	mRNA	TNF superfamily member 4 [Source:HGNC Symbol;Acc:HGNC:11934]	122.548	0.436098	0.14257	0.000135936	0.00442737	148	106	83	142	130	164	169	130	81.6237	111.641	85.2861	140.819	134.336	169.12	149.744	134.173	Up Regulated
ENSG00000147614	ENSG00000147614.4	ATP6V0D2	85987323	86154225	1	mRNA	ATPase H+ transporting V0 subunit d2 [Source:HGNC Symbol;Acc:HGNC:18266]	148.2	0.980222	0.338584	0.000136012	0.00442737	45	119	128	361	351	320	397	370	24.818	125.332	131.526	357.996	362.708	329.99	351.766	381.878	Up Regulated
ENSG00000167183	ENSG00000167183.3	PRR15L	47951967	47957883	-1	mRNA	proline rich 15 like [Source:HGNC Symbol;Acc:HGNC:28149]	30.2514	0.804267	0.272726	0.000138721	0.00450832	25	22	10	12	30	25	32	27	13.7878	23.1707	10.2754	11.9002	31.0007	25.7805	28.3539	27.8667	Up Regulated
ENSG00000103479	ENSG00000103479.16	RBL2	53433977	53491648	1	mRNA	RB transcriptional corepressor like 2 [Source:HGNC Symbol;Acc:HGNC:9894]	1931.94	0.213843	0.0632056	0.000140361	0.00455433	3116	1868	1782	2167	2218	2087	2606	2196	1718.51	1967.4	1831.08	2148.97	2291.98	2152.15	2309.07	2266.5	Up Regulated
ENSG00000282608	ENSG00000282608.1	ADORA3	111499429	111503633	-1	mRNA	adenosine A3 receptor [Source:HGNC Symbol;Acc:HGNC:268]	271.649	0.564584	0.189466	0.000140733	0.00455912	568	352	322	539	568	594	722	593	313.258	370.731	330.869	534.516	586.947	612.544	639.735	612.036	Up Regulated
ENSG00000085982	ENSG00000085982.13	USP40	233475520	233566782	-1	mRNA	ubiquitin specific peptidase 40 [Source:HGNC Symbol;Acc:HGNC:20069]	1419.57	0.166436	0.0474849	0.000141082	0.00456315	2117	1208	1199	1385	1442	1417	1587	1301	1167.55	1272.28	1232.02	1373.48	1490.1	1461.24	1406.18	1342.76	Up Regulated
ENSG00000119509	ENSG00000119509.13	INVS	100099243	100302175	1	mRNA	inversin [Source:HGNC Symbol;Acc:HGNC:17870]	833.964	-0.195962	0.0571535	0.000141658	0.00456724	1533	782	812	851	674	705	856	679	845.467	823.612	834.365	843.92	696.482	727.009	758.467	700.797	Down Regulated
ENSG00000134698	ENSG00000134698.11	AGO4	35808016	35857890	1	mRNA	argonaute RISC component 4 [Source:HGNC Symbol;Acc:HGNC:18424]	2139.93	0.281604	0.0869769	0.000141915	0.00456828	2614	1717	1993	2344	2373	2270	2732	2207	1441.65	1808.37	2047.89	2324.5	2452.16	2340.87	2420.72	2277.85	Up Regulated
ENSG00000143228	ENSG00000143228.13	NUF2	163266576	163355764	1	mRNA	NUF2 component of NDC80 kinetochore complex [Source:HGNC Symbol;Acc:HGNC:14621]	529.552	-0.481685	0.15964	0.000143413	0.00460051	991	608	794	480	438	349	483	421	546.548	640.353	815.87	476.006	452.61	359.895	427.967	434.515	Down Regulated
ENSG00000198001	ENSG00000198001.13	IRAK4	43758944	43798307	1	mRNA	interleukin 1 receptor associated kinase 4 [Source:HGNC Symbol;Acc:HGNC:17967]	1007.17	-0.264445	0.0809139	0.000143596	0.00460051	2190	1187	1257	1080	979	922	1096	956	1207.81	1250.16	1291.62	1071.01	1011.66	950.783	971.122	986.689	Down Regulated
ENSG00000132967	ENSG00000132967.9	HMGB1P5	22381819	22382929	1	mRNA	high mobility group box 1 pseudogene 5 [Source:HGNC Symbol;Acc:HGNC:4997]	1631.92	-0.298998	0.0932961	0.000144366	0.00461789	3663	2145	2636	1801	1699	1603	1910	1768	2020.19	2259.14	2708.61	1786.02	1755.67	1653.04	1692.37	1824.76	Down Regulated
ENSG00000162063	ENSG00000162063.13	CCNF	2429394	2458854	1	mRNA	cyclin F [Source:HGNC Symbol;Acc:HGNC:1591]	594.639	-0.565414	0.190422	0.000144947	0.00462919	802	598	726	399	352	332	383	337	442.312	629.821	745.997	395.68	363.741	342.364	339.361	347.818	Down Regulated
ENSG00000153317	ENSG00000153317.15	ASAP1	130052104	130443674	-1	mRNA	ArfGAP with SH3 domain, ankyrin repeat and PH domain 1 [Source:HGNC Symbol;Acc:HGNC:2720]	5843.36	0.342048	0.108919	0.000145428	0.00463727	5470	3642	3736	4995	4841	4908	5767	5198	3016.77	3835.8	3838.9	4953.44	5002.48	5061.22	5109.91	5364.86	Up Regulated
ENSG00000176597	ENSG00000176597.12	B3GNT5	183253253	183298504	1	mRNA	UDP-GlcNAc:betaGal beta-1,3-N-acetylglucosaminyltransferase 5 [Source:HGNC Symbol;Acc:HGNC:15684]	651.761	-0.384944	0.124335	0.000146115	0.00464458	2034	666	778	562	518	549	680	622	1121.77	701.44	799.429	557.324	535.279	566.139	602.521	641.967	Down Regulated
ENSG00000181274	ENSG00000181274.6	FRAT2	97332497	97334729	-1	mRNA	FRAT regulator of WNT signaling pathway 2 [Source:HGNC Symbol;Acc:HGNC:16048]	813.331	0.290196	0.0904753	0.000146945	0.00466242	786	648	533	664	698	729	791	702	433.488	682.482	547.681	658.476	721.283	751.758	700.874	724.535	Up Regulated
ENSG00000166801	ENSG00000166801.15	FAM111A	59142748	59155039	1	mRNA	FAM111 trypsin like peptidase A [Source:HGNC Symbol;Acc:HGNC:24725]	4054.44	-0.394871	0.128282	0.000147135	0.00466242	9828	5543	7071	4104	4141	3780	4724	3959	5420.25	5837.96	7265.76	4069.85	4279.13	3898.01	4185.75	4086.09	Down Regulated
ENSG00000168411	ENSG00000168411.14	RFWD3	74621399	74666877	-1	mRNA	ring finger and WD repeat domain 3 [Source:HGNC Symbol;Acc:HGNC:25539]	2297.91	-0.267939	0.0823589	0.000147699	0.00467299	4388	2209	2682	1969	1934	1783	2064	1940	2420.03	2326.55	2755.87	1952.62	1998.51	1838.66	1828.83	2002.28	Down Regulated
ENSG00000165731	ENSG00000165731.19	RET	43077064	43130351	1	mRNA	ret proto-oncogene [Source:HGNC Symbol;Acc:HGNC:9967]	837.422	0.439832	0.145181	0.000148088	0.004678	452	492	376	566	600	607	650	592	249.283	518.181	386.356	561.291	620.014	625.949	575.939	611.004	Up Regulated
ENSG00000158042	ENSG00000158042.8	MRPL17	6680385	6683340	-1	mRNA	mitochondrial ribosomal protein L17 [Source:HGNC Symbol;Acc:HGNC:14053]	756.712	-0.302515	0.0948289	0.0001496	0.00471349	1632	910	835	787	634	680	809	659	900.066	958.424	857.999	780.452	655.148	701.228	716.823	680.155	Down Regulated
ENSG00000142945	ENSG00000142945.13	KIF2C	44739818	44767767	1	mRNA	kinesin family member 2C [Source:HGNC Symbol;Acc:HGNC:6393]	931.931	-0.49951	0.166933	0.000149675	0.00471349	1583	1132	1464	765	707	647	786	762	873.042	1192.24	1504.32	758.635	730.583	667.198	696.443	786.461	Down Regulated
ENSG00000173083	ENSG00000173083.15	HPSE	83292461	83335153	-1	mRNA	heparanase [Source:HGNC Symbol;Acc:HGNC:5164]	389.223	-0.407987	0.132012	0.000150012	0.00471679	978	601	595	356	385	355	413	400	539.378	632.981	611.388	353.038	397.842	366.082	365.943	412.841	Down Regulated
ENSG00000163430	ENSG00000163430.12	FSTL1	120392293	120450993	-1	mRNA	follistatin like 1 [Source:HGNC Symbol;Acc:HGNC:3972]	105.02	-0.368166	0.118477	0.000150263	0.00471739	358	168	190	175	126	130	164	141	197.441	176.94	195.233	173.544	130.203	134.058	145.314	145.526	Down Regulated
ENSG00000110799	ENSG00000110799.13	VWF	5948877	6124770	-1	mRNA	von Willebrand factor [Source:HGNC Symbol;Acc:HGNC:12726]	176.955	0.747508	0.258388	0.000151606	0.0047389	135	137	124	287	257	290	312	309	74.454	144.29	127.415	284.612	265.573	299.053	276.451	318.919	Up Regulated
ENSG00000219507	ENSG00000219507.4	FTH1P8	148052233	148052746	1	mRNA	ferritin heavy chain 1 pseudogene 8 [Source:HGNC Symbol;Acc:HGNC:3995]	2060.49	0.367307	0.118557	0.000151621	0.0047389	2565	1250	1137	1696	1581	1867	2174	1946	1414.63	1316.52	1168.32	1681.89	1633.74	1925.28	1926.29	2008.47	Up Regulated
ENSG00000183508	ENSG00000183508.5	TENT5C	117606048	117628389	1	mRNA	terminal nucleotidyltransferase 5C [Source:HGNC Symbol;Acc:HGNC:24712]	158.337	0.499474	0.167865	0.000151866	0.0047389	176	260	157	232	282	268	335	256	97.066	273.835	161.324	230.07	291.407	276.366	296.83	264.218	Up Regulated
ENSG00000169926	ENSG00000169926.11	KLF13	31326835	31435665	1	mRNA	Kruppel like factor 13 [Source:HGNC Symbol;Acc:HGNC:13672]	190.586	0.342686	0.109794	0.000151882	0.0047389	302	203	178	216	260	246	287	229	166.556	213.802	182.903	214.203	268.673	253.68	254.299	236.351	Up Regulated
ENSG00000215835	ENSG00000215835.2		166275629	166277597	-1	mRNA	Ewing sarcoma breakpoint region 1 (EWSR1) pseudogene	1255.76	0.280351	0.0870388	0.000152296	0.00474453	2377	1189	1225	1609	1662	1577	1845	1721	1310.94	1252.27	1258.74	1595.61	1717.44	1626.23	1634.78	1776.25	Up Regulated
ENSG00000147677	ENSG00000147677.11	EIF3H	116642130	116766925	-1	mRNA	eukaryotic translation initiation factor 3 subunit H [Source:HGNC Symbol;Acc:HGNC:3273]	6339.96	0.178759	0.051837	0.000154502	0.00480588	11921	6854	6612	7969	7761	7753	9360	8039	6574.57	7218.72	6794.12	7902.7	8019.88	7995.04	8293.52	8297.07	Up Regulated
ENSG00000133195	ENSG00000133195.11	SLC39A11	72645949	73092712	-1	mRNA	solute carrier family 39 member 11 [Source:HGNC Symbol;Acc:HGNC:14463]	1524.45	0.198613	0.0585168	0.000155735	0.00483682	2460	1186	1250	1542	1414	1517	1770	1664	1356.72	1249.11	1284.43	1529.17	1461.17	1564.36	1568.33	1717.42	Up Regulated
ENSG00000000938	ENSG00000000938.13	FGR	27612064	27635185	-1	mRNA	FGR proto-oncogene, Src family tyrosine kinase [Source:HGNC Symbol;Acc:HGNC:3697]	2091.92	0.587767	0.200299	0.000157015	0.00486377	1705	2177	1724	3225	3273	3444	3712	2947	940.327	2292.84	1771.49	3198.17	3382.18	3551.52	3289.06	3041.6	Up Regulated
ENSG00000126351	ENSG00000126351.12	THRA	40058290	40093867	1	mRNA	thyroid hormone receptor alpha [Source:HGNC Symbol;Acc:HGNC:11796]	554.003	0.461975	0.154141	0.000157081	0.00486377	408	257	244	392	402	439	376	432	225.017	270.676	250.721	388.739	415.409	452.705	333.159	445.868	Up Regulated
ENSG00000114013	ENSG00000114013.16	CD86	122055362	122121139	1	mRNA	CD86 molecule [Source:HGNC Symbol;Acc:HGNC:1705]	141.265	-0.818022	0.283845	0.000158327	0.00489489	535	145	150	74	78	77	83	110	295.058	152.716	154.132	73.3843	80.6018	79.4038	73.543	113.531	Down Regulated
ENSG00000104450	ENSG00000104450.12	SPAG1	100157906	100259278	1	mRNA	sperm associated antigen 1 [Source:HGNC Symbol;Acc:HGNC:11212]	609.325	-0.300824	0.0949852	0.000165112	0.00508259	1285	543	631	474	475	455	536	450	708.692	571.895	648.38	470.056	490.844	469.204	474.928	464.446	Down Regulated
ENSG00000106610	ENSG00000106610.15	STAG3L4	67302621	67362950	1	mRNA	stromal antigen 3-like 4 (pseudogene) [Source:HGNC Symbol;Acc:HGNC:33887]	294.323	0.28002	0.0878038	0.000165149	0.00508259	453	292	307	360	376	378	403	371	249.835	307.538	315.456	357.005	388.542	389.801	357.082	382.91	Up Regulated
ENSG00000047249	ENSG00000047249.18	ATP6V1H	53715543	53843558	-1	mRNA	ATPase H+ transporting V1 subunit H [Source:HGNC Symbol;Acc:HGNC:18303]	2944.33	0.210879	0.0630633	0.000165813	0.00509531	3649	2066	2044	2635	2478	2542	3128	2424	2012.46	2175.94	2100.3	2613.08	2560.66	2621.36	2771.6	2501.81	Up Regulated
ENSG00000177426	ENSG00000177426.20	TGIF1	3411608	3459978	1	mRNA	TGFB induced factor homeobox 1 [Source:HGNC Symbol;Acc:HGNC:11776]	1282.46	0.265053	0.0822135	0.000166211	0.00509982	2333	1177	1148	1510	1552	1670	1744	1489	1286.68	1239.63	1179.62	1497.44	1603.77	1722.13	1545.29	1536.8	Up Regulated
ENSG00000137845	ENSG00000137845.15	ADAM10	58588809	58749791	-1	mRNA	ADAM metallopeptidase domain 10 [Source:HGNC Symbol;Acc:HGNC:188]	11374.6	0.342531	0.110613	0.00016731	0.00512239	10709	9721	9314	12430	12783	11968	13723	11922	5906.13	10238.3	9570.54	12326.6	13209.4	12341.6	12159.4	12304.7	Up Regulated
ENSG00000164691	ENSG00000164691.17	TAGAP	159034468	159045152	-1	mRNA	T cell activation RhoGTPase activating protein [Source:HGNC Symbol;Acc:HGNC:15669]	1098.2	-0.388369	0.127568	0.000167694	0.00512239	3759	1505	2051	1074	1024	1281	1383	1353	2073.13	1585.09	2107.49	1065.06	1058.16	1320.99	1225.42	1396.43	Down Regulated
ENSG00000101333	ENSG00000101333.16	PLCB4	9067825	9504593	1	mRNA	phospholipase C beta 4 [Source:HGNC Symbol;Acc:HGNC:9059]	47.6614	-1.02017	0.357323	0.000167703	0.00512239	317	48	47	23	36	38	32	25	174.829	50.5542	48.2946	22.8086	37.2008	39.1863	28.3539	25.8025	Down Regulated
ENSG00000169679	ENSG00000169679.14	BUB1	110637528	110678063	-1	mRNA	BUB1 mitotic checkpoint serine/threonine kinase [Source:HGNC Symbol;Acc:HGNC:1148]	934.461	-0.404427	0.133661	0.000168066	0.00512576	1528	985	1167	745	691	662	714	700	842.709	1037.41	1199.14	738.802	714.049	682.666	632.647	722.471	Down Regulated
ENSG00000143882	ENSG00000143882.12	ATP6V1C2	10721100	10785110	1	mRNA	ATPase H+ transporting V1 subunit C2 [Source:HGNC Symbol;Acc:HGNC:18264]	868.916	0.431019	0.143621	0.000168493	0.00513107	1487	1140	1077	1998	1802	1781	2013	1697	820.097	1200.66	1106.66	1981.38	1862.11	1836.6	1783.64	1751.48	Up Regulated
ENSG00000144711	ENSG00000144711.16	IQSEC1	12897043	13283281	-1	mRNA	IQ motif and Sec7 domain ArfGEF 1 [Source:HGNC Symbol;Acc:HGNC:29112]	812.693	0.4419	0.147739	0.000169791	0.00515499	1087	571	516	969	897	946	1094	949	599.493	601.385	530.213	960.938	926.921	975.532	969.35	979.464	Up Regulated
ENSG00000100526	ENSG00000100526.20	CDKN3	54396849	54420218	1	mRNA	cyclin dependent kinase inhibitor 3 [Source:HGNC Symbol;Acc:HGNC:1791]	222.402	-0.456647	0.153287	0.000170127	0.00515499	428	251	343	199	162	172	207	188	236.047	264.356	352.447	197.344	167.404	177.37	183.414	194.035	Down Regulated
ENSG00000132773	ENSG00000132773.12	TOE1	45340052	45343973	1	mRNA	target of EGR1, exonuclease [Source:HGNC Symbol;Acc:HGNC:15954]	479.455	-0.34884	0.11302	0.000170542	0.00515499	1146	538	556	443	384	425	471	410	632.032	566.629	571.314	439.314	396.809	438.268	417.334	423.162	Down Regulated
ENSG00000117614	ENSG00000117614.10	SYF2	25222276	25232502	-1	mRNA	SYF2 pre-mRNA splicing factor [Source:HGNC Symbol;Acc:HGNC:19824]	1009.16	0.273441	0.0855459	0.000170547	0.00515499	1458	981	1002	1241	1235	1230	1406	1234	804.103	1033.2	1029.6	1230.67	1276.2	1268.4	1245.8	1273.61	Up Regulated
ENSG00000125845	ENSG00000125845.7	BMP2	6767686	6780246	1	mRNA	bone morphogenetic protein 2 [Source:HGNC Symbol;Acc:HGNC:1069]	663.263	0.451222	0.151845	0.000175201	0.00528778	570	376	294	512	540	497	654	522	314.361	396.008	302.098	507.74	558.013	512.515	579.483	538.757	Up Regulated
ENSG00000102575	ENSG00000102575.11	ACP5	11574653	11579993	-1	mRNA	acid phosphatase 5, tartrate resistant [Source:HGNC Symbol;Acc:HGNC:124]	67.8554	0.845174	0.299115	0.000176542	0.00532036	77	38	44	166	122	139	180	151	42.4664	40.0221	45.2119	164.619	126.069	143.339	159.491	155.847	Up Regulated
ENSG00000185130	ENSG00000185130.5	H2BC13	27807479	27807929	-1	mRNA	H2B clustered histone 13 [Source:HGNC Symbol;Acc:HGNC:4748]	632.066	-0.994151	0.3542	0.000176889	0.00532291	1293	843	1142	459	304	329	426	370	713.104	887.858	1173.45	455.181	314.14	339.271	377.462	381.878	Down Regulated
ENSG00000172244	ENSG00000172244.9	C5orf34	43486709	43515148	-1	mRNA	chromosome 5 open reading frame 34 [Source:HGNC Symbol;Acc:HGNC:24738]	266.129	-0.36585	0.119918	0.000177241	0.00532562	399	229	239	217	183	161	178	168	220.053	241.186	245.583	215.195	189.104	166.026	157.719	173.393	Down Regulated
ENSG00000134545	ENSG00000134545.13	KLRC1	10442264	10454685	-1	mRNA	killer cell lectin like receptor C1 [Source:HGNC Symbol;Acc:HGNC:6374]	8.94691	-2.09994	0.675247	0.000178249	0.00534799	12	13	8	6	2	1	1	2	6.61813	13.6918	8.22035	5.95008	2.06671	1.03122	0.88606	2.0642	Down Regulated
ENSG00000137822	ENSG00000137822.12	TUBGCP4	43369221	43409771	1	mRNA	tubulin gamma complex associated protein 4 [Source:HGNC Symbol;Acc:HGNC:16691]	326.028	-0.356618	0.1163	0.000180411	0.00538899	584	233	277	208	185	181	234	210	322.083	245.399	284.63	206.269	191.171	186.651	207.338	216.741	Down Regulated
ENSG00000144645	ENSG00000144645.13	OSBPL10	31657912	32077580	-1	mRNA	oxysterol binding protein like 10 [Source:HGNC Symbol;Acc:HGNC:16395]	271.376	-0.352454	0.115118	0.000180887	0.00539527	417	242	259	174	197	168	181	154	229.98	254.878	266.134	172.552	203.571	173.245	160.377	158.944	Down Regulated
ENSG00000143079	ENSG00000143079.15	CTTNBP2NL	112396214	112463456	1	mRNA	CTTNBP2 N-terminal like [Source:HGNC Symbol;Acc:HGNC:25330]	1478.89	0.2307	0.0705635	0.000181222	0.00539735	2497	1604	1430	1844	1893	1922	2030	1805	1377.12	1689.35	1469.39	1828.66	1956.14	1982	1798.7	1862.94	Up Regulated
ENSG00000141542	ENSG00000141542.11	RAB40B	82654973	82698698	-1	mRNA	RAB40B, member RAS oncogene family [Source:HGNC Symbol;Acc:HGNC:18284]	129.109	0.535892	0.185134	0.000182119	0.00541322	114	115	92	150	141	166	181	170	62.8723	121.119	94.534	148.752	145.703	171.182	160.377	175.457	Up Regulated
ENSG00000179218	ENSG00000179218.13	CALR	12938578	12944489	1	mRNA	calreticulin [Source:HGNC Symbol;Acc:HGNC:1455]	19387.1	-0.412542	0.13782	0.000182289	0.00541322	50203	16455	15392	13260	12544	13026	15129	12765	27687.5	17330.6	15816	13149.7	12962.4	13432.6	13405.2	13174.8	Down Regulated
ENSG00000197568	ENSG00000197568.14	HHLA3	70354786	70385339	1	mRNA	HERV-H LTR-associating 3 [Source:HGNC Symbol;Acc:HGNC:4906]	67.8998	0.53834	0.184459	0.000182873	0.00542265	93	37	56	48	56	65	98	90	51.2905	38.9689	57.5424	47.6006	57.868	67.0292	86.8339	92.8891	Up Regulated
ENSG00000132623	ENSG00000132623.16	ANKEF1	9986126	10058303	1	mRNA	ankyrin repeat and EF-hand domain containing 1 [Source:HGNC Symbol;Acc:HGNC:15803]	34.7598	-0.846399	0.296898	0.0001837	0.0054364	212	44	44	33	35	31	31	27	116.92	46.3414	45.2119	32.7254	36.1675	31.9678	27.4679	27.8667	Down Regulated
ENSG00000143546	ENSG00000143546.10	S100A8	153390032	153391073	-1	mRNA	S100 calcium binding protein A8 [Source:HGNC Symbol;Acc:HGNC:10498]	100.069	-1.4127	0.511452	0.000183872	0.0054364	1068	148	221	62	58	66	112	88	589.014	155.876	227.087	61.4842	59.9347	68.0604	99.2387	90.8249	Down Regulated
ENSG00000169826	ENSG00000169826.8	CSGALNACT2	43138445	43185302	1	mRNA	chondroitin sulfate N-acetylgalactosaminyltransferase 2 [Source:HGNC Symbol;Acc:HGNC:24292]	751.694	0.36874	0.121645	0.000184409	0.00544434	763	485	480	680	667	700	801	674	420.803	510.808	493.221	674.342	689.249	721.853	709.734	695.637	Up Regulated
ENSG00000113448	ENSG00000113448.19	PDE4D	58969038	60522120	-1	mRNA	phosphodiesterase 4D [Source:HGNC Symbol;Acc:HGNC:8783]	888.99	-0.458564	0.150701	0.000185327	0.00546352	2981	911	1019	803	729	779	891	729	1644.05	959.477	1047.07	796.319	753.317	803.319	789.48	752.402	Down Regulated
ENSG00000053524	ENSG00000053524.12	MCF2L2	183178041	183428778	-1	mRNA	MCF.2 cell line derived transforming sequence-like 2 [Source:HGNC Symbol;Acc:HGNC:30319]	38.017	-0.975363	0.340713	0.000185646	0.00546499	48	16	26	20	12	9	11	9	26.4725	16.8514	26.7161	19.8336	12.4003	9.28096	9.74666	9.28891	Down Regulated
ENSG00000196352	ENSG00000196352.15	CD55	207321519	207386804	1	mRNA	CD55 molecule (Cromer blood group) [Source:HGNC Symbol;Acc:HGNC:2665]	2058.17	0.358939	0.117999	0.000186352	0.00547018	2282	1367	1215	1990	1987	1995	2301	1692	1258.55	1439.74	1248.47	1973.44	2053.28	2057.28	2038.82	1746.32	Up Regulated
ENSG00000135932	ENSG00000135932.11	CAB39	230712842	230821075	1	mRNA	calcium binding protein 39 [Source:HGNC Symbol;Acc:HGNC:20292]	7584.5	0.207572	0.0625332	0.000186361	0.00547018	13039	8448	7740	9206	9591	9197	11068	9397	7191.15	8897.54	7953.19	9129.41	9910.92	9484.11	9806.91	9698.66	Up Regulated
ENSG00000162923	ENSG00000162923.16	WDR26	224385146	224437033	-1	mRNA	WD repeat domain 26 [Source:HGNC Symbol;Acc:HGNC:21208]	11033.3	0.238131	0.0733936	0.000187242	0.00547665	14002	10203	9042	11111	11859	11338	13091	10775	7722.26	10745.9	9291.05	11018.6	12254.6	11692	11599.4	11120.9	Up Regulated
ENSG00000217801	ENSG00000217801.10		1059687	1069355	1	mRNA	protein tyrosine phosphatase family pseudogene	178.882	0.698289	0.246782	0.000187311	0.00547665	87	101	63	144	150	162	196	137	47.9815	106.375	64.7353	142.802	155.003	167.057	173.668	141.398	Up Regulated
ENSG00000102054	ENSG00000102054.17	RBBP7	16839283	16870362	-1	mRNA	RB binding protein 7, chromatin remodeling factor [Source:HGNC Symbol;Acc:HGNC:9890]	2102.76	-0.287465	0.0913419	0.00018739	0.00547665	5108	2373	2653	1922	1907	1817	2318	1969	2817.12	2499.27	2726.07	1906.01	1970.61	1873.72	2053.89	2032.21	Down Regulated
ENSG00000164626	ENSG00000164626.9	KCNK5	39188971	39229475	-1	mRNA	potassium two pore domain channel subfamily K member 5 [Source:HGNC Symbol;Acc:HGNC:6280]	167.18	-0.652115	0.228378	0.000189511	0.00552273	381	177	160	98	117	83	89	98	210.126	186.419	164.407	97.1846	120.903	85.5911	78.8593	101.146	Down Regulated
ENSG00000177156	ENSG00000177156.11	TALDO1	747415	765012	1	mRNA	transaldolase 1 [Source:HGNC Symbol;Acc:HGNC:11559]	4153.61	0.413625	0.138996	0.000191798	0.00558138	7080	3525	3287	6115	5542	5780	6786	5974	3904.7	3712.58	3377.54	6064.12	5726.86	5960.44	6012.8	6165.78	Up Regulated
ENSG00000067066	ENSG00000067066.17	SP100	230415942	230545606	1	mRNA	SP100 nuclear antigen [Source:HGNC Symbol;Acc:HGNC:11206]	4223.46	0.286193	0.0912422	0.000194284	0.00564562	5964	3812	3745	5307	5277	4907	5841	4739	3289.21	4014.85	3848.15	5262.85	5453.02	5060.19	5175.48	4891.13	Up Regulated
ENSG00000115594	ENSG00000115594.12	IL1R1	102064544	102179874	1	mRNA	interleukin 1 receptor type 1 [Source:HGNC Symbol;Acc:HGNC:5993]	474.873	0.545991	0.189728	0.00019499	0.00565806	247	124	178	239	243	271	300	267	136.223	130.598	182.903	237.012	251.106	279.46	265.818	275.571	Up Regulated
ENSG00000166446	ENSG00000166446.15	CDYL2	80597907	80804598	-1	mRNA	chromodomain Y like 2 [Source:HGNC Symbol;Acc:HGNC:23030]	1213.8	0.23521	0.0727432	0.000196004	0.00567935	1278	883	810	932	983	979	1102	1020	704.831	929.987	832.31	924.246	1015.79	1009.56	976.438	1052.74	Up Regulated
ENSG00000113657	ENSG00000113657.13	DPYSL3	147390808	147510068	-1	mRNA	dihydropyrimidinase like 3 [Source:HGNC Symbol;Acc:HGNC:3015]	45.23	0.607866	0.214754	0.000198811	0.00573709	48	48	41	64	78	74	68	74	26.4725	50.5542	42.1293	63.4675	80.6018	76.3102	60.2521	76.3755	Up Regulated
ENSG00000276256	ENSG00000276256.1		42939	49164	-1	mRNA		25.7209	-0.871599	0.306895	0.000199032	0.00573709	72	31	28	21	9	11	18	23	39.7088	32.6496	28.7712	20.8253	9.30021	11.3434	15.9491	23.7383	Down Regulated
ENSG00000087299	ENSG00000087299.12	L2HGDH	50237563	50312229	-1	mRNA	L-2-hydroxyglutarate dehydrogenase [Source:HGNC Symbol;Acc:HGNC:20499]	135	-0.490849	0.168297	0.000199126	0.00573709	305	141	163	88	96	77	118	98	168.211	148.503	167.49	87.2678	99.2022	79.4038	104.555	101.146	Down Regulated
ENSG00000197915	ENSG00000197915.6	HRNR	152212076	152224193	-1	mRNA	hornerin [Source:HGNC Symbol;Acc:HGNC:20846]	100.827	-0.604304	0.209648	0.000201049	0.00578428	126	42	42	53	42	23	33	34	69.4904	44.2349	43.1568	52.559	43.401	23.718	29.24	35.0915	Down Regulated
ENSG00000154760	ENSG00000154760.14	SLFN13	35435096	35448837	-1	mRNA	schlafen family member 13 [Source:HGNC Symbol;Acc:HGNC:26481]	558.405	-0.42162	0.14282	0.000201847	0.00579902	1039	538	726	455	413	366	458	434	573.02	566.629	745.997	451.214	426.776	377.426	405.816	447.932	Down Regulated
ENSG00000107651	ENSG00000107651.13	SEC23IP	119892730	119944657	1	mRNA	SEC23 interacting protein [Source:HGNC Symbol;Acc:HGNC:17018]	1263.22	0.213877	0.0651905	0.000202663	0.00581424	1654	791	836	949	994	1023	1189	1020	912.2	833.091	859.027	941.104	1027.16	1054.94	1053.53	1052.74	Up Regulated
ENSG00000219682	ENSG00000219682.4		25140003	25141403	1	mRNA	nucleoporin 50kD (NUP50) pseudogene	341.537	-0.36612	0.121681	0.000203741	0.00583247	878	404	478	345	296	323	361	331	484.227	425.498	491.166	342.13	305.874	333.084	319.868	341.626	Down Regulated
ENSG00000198929	ENSG00000198929.13	NOS1AP	162069691	162370475	1	mRNA	nitric oxide synthase 1 adaptor protein [Source:HGNC Symbol;Acc:HGNC:16859]	129.866	0.472522	0.161939	0.000203872	0.00583247	104	40	52	67	76	85	90	77	57.3572	42.1285	53.4323	66.4426	78.5351	87.6536	79.7454	79.4718	Up Regulated
ENSG00000177084	ENSG00000177084.16	POLE	132623753	132687376	-1	mRNA	DNA polymerase epsilon, catalytic subunit [Source:HGNC Symbol;Acc:HGNC:9177]	1964.85	-0.397998	0.133963	0.00020448	0.00584162	3281	1403	1816	1116	1082	1097	1242	1150	1809.51	1477.66	1866.02	1106.71	1118.09	1131.25	1100.49	1186.92	Down Regulated
ENSG00000101265	ENSG00000101265.16	RASSF2	4780023	4823608	-1	mRNA	Ras association domain family member 2 [Source:HGNC Symbol;Acc:HGNC:9883]	1556.57	-0.291842	0.093838	0.000207311	0.00591417	3699	1352	1678	1299	1208	1279	1423	1281	2040.04	1423.94	1724.22	1288.19	1248.29	1318.93	1260.86	1322.12	Down Regulated
ENSG00000112742	ENSG00000112742.10	TTK	80003887	80042527	1	mRNA	TTK protein kinase [Source:HGNC Symbol;Acc:HGNC:12401]	873.76	-0.457988	0.157295	0.000208302	0.00592669	1860	1080	1372	889	767	666	861	794	1025.81	1137.47	1409.79	881.604	792.584	686.791	762.898	819.489	Down Regulated
ENSG00000100368	ENSG00000100368.14	CSF2RB	36913628	36940439	1	mRNA	colony stimulating factor 2 receptor subunit beta [Source:HGNC Symbol;Acc:HGNC:2436]	1425.3	0.322574	0.105561	0.000208333	0.00592669	2412	1286	1282	1809	1773	1924	2021	1836	1330.25	1354.43	1317.31	1793.95	1832.14	1984.06	1790.73	1894.94	Up Regulated
ENSG00000228519	ENSG00000228519.3	RANBP1P1	25645722	25646327	-1	mRNA	RANBP1 pseudogene 1 [Source:HGNC Symbol;Acc:HGNC:54908]	669.152	-0.364123	0.121371	0.000209904	0.00596305	1787	867	917	716	660	608	774	634	985.551	913.136	942.258	710.043	682.015	626.981	685.811	654.352	Down Regulated
ENSG00000101493	ENSG00000101493.11	ZNF516	76357682	76495242	-1	mRNA	zinc finger protein 516 [Source:HGNC Symbol;Acc:HGNC:28990]	3364.49	0.315214	0.102892	0.000210958	0.0059846	4203	2047	2017	2944	2846	2975	3563	2921	2318	2155.93	2072.56	2919.51	2940.93	3067.87	3157.03	3014.77	Up Regulated
ENSG00000188486	ENSG00000188486.3	H2AX	119093874	119095465	-1	mRNA	H2A.X variant histone [Source:HGNC Symbol;Acc:HGNC:4739]	1407.35	-0.638944	0.227059	0.000212189	0.00601113	3385	1696	1864	1077	769	891	1291	1018	1866.87	1786.25	1915.34	1068.04	794.651	918.815	1143.9	1050.68	Down Regulated
ENSG00000180071	ENSG00000180071.20	ANKRD18A	38571358	38620596	-1	mRNA	ankyrin repeat domain 18A [Source:HGNC Symbol;Acc:HGNC:23643]	528.458	-0.612604	0.216304	0.000214061	0.00604271	463	132	187	100	104	117	93	104	255.35	139.024	192.151	99.168	107.469	120.653	82.4036	107.339	Down Regulated
ENSG00000111206	ENSG00000111206.12	FOXM1	2857680	2877174	-1	mRNA	forkhead box M1 [Source:HGNC Symbol;Acc:HGNC:3818]	529.711	-0.584245	0.206375	0.000214196	0.00604271	686	437	587	233	255	238	284	262	378.337	460.254	603.168	231.061	263.506	245.43	251.641	270.411	Down Regulated
ENSG00000101945	ENSG00000101945.16	SUV39H1	48695554	48709016	1	mRNA	SUV39H1 histone lysine methyltransferase [Source:HGNC Symbol;Acc:HGNC:11479]	304.219	-0.482066	0.167159	0.000215873	0.00608157	529	286	371	233	205	184	230	199	291.749	301.219	381.219	231.061	211.838	189.744	203.794	205.388	Down Regulated
ENSG00000112972	ENSG00000112972.15	HMGCS1	43287470	43313512	-1	mRNA	3-hydroxy-3-methylglutaryl-CoA synthase 1 [Source:HGNC Symbol;Acc:HGNC:5007]	2872.89	0.309761	0.101165	0.000216721	0.00608595	2676	1955	1894	2150	2233	2417	2857	2331	1475.84	2059.03	1946.17	2132.11	2307.49	2492.45	2531.47	2405.83	Up Regulated
ENSG00000101310	ENSG00000101310.16	SEC23B	18507520	18561415	1	mRNA	SEC23 homolog B, COPII coat complex component [Source:HGNC Symbol;Acc:HGNC:10702]	1325.22	-0.237909	0.0742222	0.000216797	0.00608595	3001	1310	1322	1211	1140	1064	1314	1183	1655.09	1379.71	1358.41	1200.92	1178.03	1097.22	1164.28	1220.98	Down Regulated
ENSG00000197451	ENSG00000197451.12	HNRNPAB	178204533	178211163	1	mRNA	heterogeneous nuclear ribonucleoprotein A/B [Source:HGNC Symbol;Acc:HGNC:5034]	2080.6	-0.238831	0.0724815	0.000216927	0.00608595	4687	2003	2229	1905	1750	1753	2251	1746	2584.93	2109.59	2290.39	1889.15	1808.37	1807.73	1994.52	1802.05	Down Regulated
ENSG00000128245	ENSG00000128245.15	YWHAH	31944522	31957603	1	mRNA	tyrosine 3-monooxygenase/tryptophan 5-monooxygenase activation protein eta [Source:HGNC Symbol;Acc:HGNC:12853]	2559.27	-0.239857	0.0750199	0.000217728	0.00609998	6335	3067	3382	2520	2587	2553	3025	2469	3493.82	3230.2	3475.15	2499.03	2673.29	2632.7	2680.33	2548.26	Down Regulated
ENSG00000229948	ENSG00000229948.2	B3GALNT1P1	69597353	69598951	1	mRNA	beta-1,3-N-acetylgalactosaminyltransferase 1 pseudogene 1 [Source:HGNC Symbol;Acc:HGNC:51302]	100.064	-0.690691	0.2467	0.000221337	0.00618404	193	54	105	55	61	44	40	41	106.442	56.8735	107.892	54.5424	63.0347	45.3736	35.4424	42.3162	Down Regulated
ENSG00000090520	ENSG00000090520.11	DNAJB11	186567403	186585800	1	mRNA	DnaJ heat shock protein family (Hsp40) member B11 [Source:HGNC Symbol;Acc:HGNC:14889]	1299.24	-0.234019	0.0732121	0.000222284	0.00620195	3165	1241	1210	1026	1035	1121	1290	1046	1745.53	1307.04	1243.33	1017.46	1069.52	1156	1143.02	1079.58	Down Regulated
ENSG00000111247	ENSG00000111247.14	RAD51AP1	4538798	4560047	1	mRNA	RAD51 associated protein 1 [Source:HGNC Symbol;Acc:HGNC:16956]	267.748	-0.51837	0.181886	0.000223339	0.00622287	716	379	500	251	247	201	276	299	394.882	399.168	513.772	248.912	255.239	207.275	244.553	308.598	Down Regulated
ENSG00000203730	ENSG00000203730.2	TEDDM1	182398117	182400667	-1	mRNA	transmembrane epididymal protein 1 [Source:HGNC Symbol;Acc:HGNC:30233]	61.1201	0.468278	0.162152	0.000224418	0.00624264	131	50	62	90	100	102	117	95	72.248	52.6606	63.7077	89.2512	103.336	105.184	103.669	98.0497	Up Regulated
ENSG00000108175	ENSG00000108175.17	ZMIZ1	79068966	79316519	1	mRNA	zinc finger MIZ-type containing 1 [Source:HGNC Symbol;Acc:HGNC:16493]	3267.47	0.442795	0.152793	0.000224664	0.00624264	2322	1200	936	1673	1757	1857	1984	1875	1280.61	1263.86	961.781	1659.08	1815.61	1914.97	1757.94	1935.19	Up Regulated
ENSG00000138829	ENSG00000138829.12	FBN2	128257909	128659185	-1	mRNA	fibrillin 2 [Source:HGNC Symbol;Acc:HGNC:3604]	2855.35	-0.236764	0.0741618	0.000226029	0.00626319	5606	3208	3131	2290	2440	2473	2770	2340	3091.77	3378.71	3217.24	2270.95	2521.39	2550.2	2454.39	2415.12	Down Regulated
ENSG00000123485	ENSG00000123485.12	HJURP	233833416	233854566	-1	mRNA	Holliday junction recognition protein [Source:HGNC Symbol;Acc:HGNC:25444]	680.046	-0.476355	0.166016	0.000226343	0.00626319	1092	820	1044	631	519	477	606	553	602.25	863.635	1072.76	625.75	536.312	491.891	536.952	570.752	Down Regulated
ENSG00000150722	ENSG00000150722.10	PPP1R1C	181954241	182131398	1	mRNA	protein phosphatase 1 regulatory inhibitor subunit 1C [Source:HGNC Symbol;Acc:HGNC:14940]	14.709	-1.73514	0.588543	0.000226581	0.00626319	19	8	10	8	2	4	2	1	10.4787	8.4257	10.2754	7.93344	2.06671	4.12487	1.77212	1.0321	Down Regulated
ENSG00000144026	ENSG00000144026.12	ZNF514	95145000	95165413	-1	mRNA	zinc finger protein 514 [Source:HGNC Symbol;Acc:HGNC:25894]	377.249	0.307287	0.100788	0.000226637	0.00626319	547	318	320	460	529	428	481	383	301.677	334.922	328.814	456.173	546.646	441.361	426.195	395.295	Up Regulated
ENSG00000139880	ENSG00000139880.19	CDH24	23047062	23057538	-1	mRNA	cadherin 24 [Source:HGNC Symbol;Acc:HGNC:14265]	270.508	-0.632482	0.226219	0.000226956	0.00626348	712	342	307	215	173	163	230	202	392.676	360.199	315.456	213.211	178.771	168.089	203.794	208.485	Down Regulated
ENSG00000180370	ENSG00000180370.10	PAK2	196739857	196832647	1	mRNA	p21 (RAC1) activated kinase 2 [Source:HGNC Symbol;Acc:HGNC:8591]	6887.39	0.176079	0.0525967	0.000227538	0.00627105	9815	5633	5505	6587	6727	6495	7343	6529	5413.08	5932.75	5656.63	6532.2	6951.39	6697.76	6506.34	6738.59	Up Regulated
ENSG00000074410	ENSG00000074410.14	CA12	63321378	63381846	-1	mRNA	carbonic anhydrase 12 [Source:HGNC Symbol;Acc:HGNC:1371]	38.0365	0.720491	0.26218	0.000228466	0.00628809	31	26	26	72	63	63	73	56	17.0968	27.3835	26.7161	71.401	65.1015	64.9668	64.6824	57.7977	Up Regulated
ENSG00000114982	ENSG00000114982.18	KANSL3	96593170	96642787	-1	mRNA	KAT8 regulatory NSL complex subunit 3 [Source:HGNC Symbol;Acc:HGNC:25473]	1438.32	-0.177686	0.0531617	0.000229843	0.00630184	2576	1171	1419	1279	1187	1126	1262	1170	1420.69	1233.31	1458.08	1268.36	1226.59	1161.15	1118.21	1207.56	Down Regulated
ENSG00000145386	ENSG00000145386.10	CCNA2	121816444	121823883	-1	mRNA	cyclin A2 [Source:HGNC Symbol;Acc:HGNC:1578]	918.346	-0.484025	0.169218	0.000229889	0.00630184	2035	1137	1520	832	817	703	892	776	1122.33	1197.5	1561.87	825.078	844.252	724.946	790.366	800.911	Down Regulated
ENSG00000133687	ENSG00000133687.16	TMTC1	29500840	29784759	-1	mRNA	transmembrane O-mannosyltransferase targeting cadherins 1 [Source:HGNC Symbol;Acc:HGNC:24099]	7769.89	0.283049	0.091578	0.000229897	0.00630184	6399	3872	3363	4681	4927	4988	5418	4481	3529.12	4078.04	3455.63	4642.05	5091.35	5143.72	4800.67	4624.85	Up Regulated
ENSG00000080839	ENSG00000080839.11	RBL1	36996349	37095997	-1	mRNA	RB transcriptional corepressor like 1 [Source:HGNC Symbol;Acc:HGNC:9893]	1621.75	-0.28373	0.0919197	0.000232525	0.00636043	3690	1804	2285	1668	1541	1490	1803	1560	2035.08	1900	2347.94	1654.12	1592.4	1536.52	1597.57	1610.08	Down Regulated
ENSG00000129187	ENSG00000129187.14	DCTD	182890060	182917936	-1	mRNA	dCMP deaminase [Source:HGNC Symbol;Acc:HGNC:2710]	1730.56	0.195667	0.0595648	0.000233835	0.00638394	2890	1704	1423	1879	1879	1969	2150	1860	1593.87	1794.67	1462.19	1863.37	1941.68	2030.47	1905.03	1919.71	Up Regulated
ENSG00000100504	ENSG00000100504.17	PYGL	50857891	50944483	-1	mRNA	glycogen phosphorylase L [Source:HGNC Symbol;Acc:HGNC:9725]	3273.22	0.239758	0.075575	0.000235031	0.00640799	4341	2764	2899	3355	3355	3389	4084	3306	2394.11	2911.08	2978.85	3327.09	3466.91	3494.8	3618.67	3412.13	Up Regulated
ENSG00000114126	ENSG00000114126.17	TFDP2	141944428	142149544	-1	mRNA	transcription factor Dp-2 [Source:HGNC Symbol;Acc:HGNC:11751]	344.411	0.273173	0.0883602	0.000240297	0.00654278	517	281	319	417	390	397	471	389	285.131	295.953	327.786	413.531	403.009	409.394	417.334	401.488	Up Regulated
ENSG00000185022	ENSG00000185022.12	MAFF	38200767	38216507	1	mRNA	MAF bZIP transcription factor F [Source:HGNC Symbol;Acc:HGNC:6780]	1197.34	0.651299	0.235814	0.000241545	0.00656485	611	521	339	844	788	949	1036	821	336.973	548.724	348.337	836.978	814.285	978.626	917.958	847.355	Up Regulated
ENSG00000171793	ENSG00000171793.15	CTPS1	40979300	41012565	1	mRNA	CTP synthase 1 [Source:HGNC Symbol;Acc:HGNC:2519]	5497.74	-0.237575	0.0749142	0.000241754	0.00656485	12652	5153	5717	4698	4648	4603	5497	4499	6977.72	5427.21	5874.47	4658.91	4803.04	4746.7	4870.67	4643.43	Down Regulated
ENSG00000166548	ENSG00000166548.15	TK2	66508003	66552544	-1	mRNA	thymidine kinase 2 [Source:HGNC Symbol;Acc:HGNC:11831]	868.473	0.267104	0.0861323	0.000243828	0.00661234	1258	769	713	988	928	954	1098	1015	693.801	809.921	732.639	979.78	958.955	983.782	972.894	1047.58	Up Regulated
ENSG00000136161	ENSG00000136161.12	RCBTB2	48488963	48533256	-1	mRNA	RCC1 and BTB domain containing protein 2 [Source:HGNC Symbol;Acc:HGNC:1914]	4223.22	0.351069	0.118485	0.000245777	0.00664979	5286	3652	3637	4912	4990	4753	5826	5029	2915.29	3846.33	3737.18	4871.13	5156.45	4901.38	5162.19	5190.44	Up Regulated
ENSG00000145107	ENSG00000145107.15	TM4SF19	196319342	196338503	-1	mRNA	transmembrane 4 L six family member 19 [Source:HGNC Symbol;Acc:HGNC:25167]	302.395	0.677311	0.246874	0.000246335	0.00664979	154	382	250	461	551	516	572	479	84.9327	402.327	256.886	457.164	569.379	532.109	506.826	494.377	Up Regulated
ENSG00000067064	ENSG00000067064.11	IDI1	1039152	1049119	-1	mRNA	isopentenyl-diphosphate delta isomerase 1 [Source:HGNC Symbol;Acc:HGNC:5387]	1644.76	0.306255	0.101209	0.000246358	0.00664979	1832	1569	1409	1775	1872	1804	2121	1753	1010.37	1652.49	1447.81	1760.23	1934.44	1860.32	1879.33	1809.27	Up Regulated
ENSG00000145050	ENSG00000145050.16	MANF	51385291	51389397	1	mRNA	mesencephalic astrocyte derived neurotrophic factor [Source:HGNC Symbol;Acc:HGNC:15461]	845.591	-0.280197	0.0909023	0.000246519	0.00664979	1667	707	634	538	537	548	721	518	919.369	744.622	651.463	533.524	554.912	565.108	638.849	534.629	Down Regulated
ENSG00000014138	ENSG00000014138.9	POLA2	65261920	65305589	1	mRNA	DNA polymerase alpha 2, accessory subunit [Source:HGNC Symbol;Acc:HGNC:30073]	199.981	-0.460591	0.161246	0.000248225	0.00668694	426	191	244	151	145	136	155	143	234.944	201.164	250.721	149.744	149.837	140.246	137.339	147.591	Down Regulated
ENSG00000213551	ENSG00000213551.5	DNAJC9	73183362	73247255	-1	mRNA	DnaJ heat shock protein family (Hsp40) member C9 [Source:HGNC Symbol;Acc:HGNC:19123]	259.968	-0.289803	0.0946088	0.000249969	0.00672499	502	209	251	197	173	199	209	189	276.859	220.121	257.913	195.361	178.771	205.212	185.187	195.067	Down Regulated
ENSG00000061455	ENSG00000061455.11	PRDM6	123089241	123194266	1	mRNA	PR/SET domain 6 [Source:HGNC Symbol;Acc:HGNC:9350]	91.4499	-0.68843	0.246857	0.000250304	0.00672509	151	37	42	36	27	28	33	31	83.2782	38.9689	43.1568	35.7005	27.9006	28.8741	29.24	31.9952	Down Regulated
ENSG00000060982	ENSG00000060982.15	BCAT1	24810024	24949101	-1	mRNA	branched chain amino acid transaminase 1 [Source:HGNC Symbol;Acc:HGNC:976]	8440.17	0.285158	0.093301	0.00025383	0.00681082	10263	5810	4928	6939	7250	7137	8584	7092	5660.16	6119.17	5063.74	6881.27	7491.83	7359.8	7605.94	7319.66	Up Regulated
ENSG00000095303	ENSG00000095303.16	PTGS1	122370530	122395703	1	mRNA	prostaglandin-endoperoxide synthase 1 [Source:HGNC Symbol;Acc:HGNC:9604]	16922.5	0.397748	0.137287	0.000254869	0.00682968	16916	15431	11750	18979	19280	19541	21541	18394	9329.36	16252.1	12073.6	18821.1	19923.1	20151	19086.6	18984.5	Up Regulated
ENSG00000102385	ENSG00000102385.12	DRP2	101219769	101264502	1	mRNA	dystrophin related protein 2 [Source:HGNC Symbol;Acc:HGNC:3032]	24.4914	-0.934381	0.345022	0.000257012	0.0068602	32	25	32	13	9	7	12	12	17.6484	26.3303	32.8814	12.8918	9.30021	7.21853	10.6327	12.3852	Down Regulated
ENSG00000162929	ENSG00000162929.13	SANBR	61065871	61138034	1	mRNA	SANT and BTB domain regulator of CSR [Source:HGNC Symbol;Acc:HGNC:29387]	399.262	-0.347947	0.117664	0.000257021	0.0068602	933	422	495	356	343	303	399	346	514.56	444.456	508.634	353.038	354.441	312.459	353.538	357.107	Down Regulated
ENSG00000182132	ENSG00000182132.13	KCNIP1	170353487	170736632	1	mRNA	potassium voltage-gated channel interacting protein 1 [Source:HGNC Symbol;Acc:HGNC:15521]	39.9105	-0.732261	0.267655	0.000258414	0.00688833	70	55	34	43	28	23	21	22	38.6058	57.9267	34.9365	42.6422	28.934	23.718	18.6073	22.7062	Down Regulated
ENSG00000163950	ENSG00000163950.13	SLBP	1692731	1712344	-1	mRNA	stem-loop binding protein [Source:HGNC Symbol;Acc:HGNC:10904]	1625.45	-0.28567	0.0936811	0.000259628	0.00691162	4061	1889	2106	1628	1458	1508	1849	1630	2239.69	1989.52	2164.01	1614.46	1506.63	1555.08	1638.33	1682.33	Down Regulated
ENSG00000139651	ENSG00000139651.11	ZNF740	53180704	53195142	1	mRNA	zinc finger protein 740 [Source:HGNC Symbol;Acc:HGNC:27465]	944.715	0.19831	0.0622279	0.000260709	0.0069313	1659	848	852	1100	1119	1055	1270	1005	914.957	893.125	875.467	1090.85	1156.33	1087.94	1125.3	1037.26	Up Regulated
ENSG00000186871	ENSG00000186871.7	ERCC6L	72204657	72239027	-1	mRNA	ERCC excision repair 6 like, spindle assembly checkpoint helicase [Source:HGNC Symbol;Acc:HGNC:20794]	208.596	-0.471763	0.166905	0.000261067	0.00693175	445	231	296	185	182	150	166	167	245.422	243.292	304.153	183.461	188.071	154.683	147.086	172.361	Down Regulated
ENSG00000171960	ENSG00000171960.11	PPIH	42658335	42676758	1	mRNA	peptidylprolyl isomerase H [Source:HGNC Symbol;Acc:HGNC:14651]	899.338	-0.236232	0.0748761	0.000261486	0.0069338	2042	827	1004	766	700	784	961	754	1126.19	871.007	1031.65	759.627	723.35	808.475	851.504	778.205	Down Regulated
ENSG00000010803	ENSG00000010803.16	SCMH1	41027202	41242306	-1	mRNA	Scm polycomb group protein homolog 1 [Source:HGNC Symbol;Acc:HGNC:19003]	3080.24	-0.239413	0.0762349	0.000263426	0.00696707	5341	2581	2964	2522	2334	2211	2516	2301	2945.62	2718.34	3045.64	2501.02	2411.85	2280.02	2229.33	2374.87	Down Regulated
ENSG00000108799	ENSG00000108799.13	EZH1	42700275	42745049	-1	mRNA	enhancer of zeste 1 polycomb repressive complex 2 subunit [Source:HGNC Symbol;Acc:HGNC:3526]	1040.99	0.232239	0.0739408	0.000274869	0.00725082	1509	939	919	1128	1222	1143	1255	1058	832.23	988.967	944.313	1118.62	1262.76	1178.68	1112.01	1091.96	Up Regulated
ENSG00000156508	ENSG00000156508.18	EEF1A1	73489308	73525587	-1	mRNA	eukaryotic translation elongation factor 1 alpha 1 [Source:HGNC Symbol;Acc:HGNC:3189]	34178.6	0.208264	0.0650136	0.00027617	0.0072757	69693	43860	41654	49343	49360	51012	59344	49485	38436.5	46193.9	42801.3	48932.5	51006.5	52604.5	52582.4	51073.5	Up Regulated
ENSG00000149532	ENSG00000149532.15	CPSF7	61402641	61430031	-1	mRNA	cleavage and polyadenylation specific factor 7 [Source:HGNC Symbol;Acc:HGNC:30098]	2318.7	-0.177364	0.0536398	0.000277033	0.00728897	4292	2141	2266	2053	2014	1801	2140	1968	2367.09	2254.93	2328.41	2035.92	2081.18	1857.22	1896.17	2031.18	Down Regulated
ENSG00000139190	ENSG00000139190.16	VAMP1	6462237	6470677	-1	mRNA	vesicle associated membrane protein 1 [Source:HGNC Symbol;Acc:HGNC:12642]	90.0145	0.430083	0.152136	0.000277747	0.00729796	105	74	70	100	107	115	105	104	57.9087	77.9378	71.9281	99.168	110.569	118.59	93.0363	107.339	Up Regulated
ENSG00000111252	ENSG00000111252.10	SH2B3	111405923	111451623	1	mRNA	SH2B adaptor protein 3 [Source:HGNC Symbol;Acc:HGNC:29605]	5717.16	0.264464	0.086218	0.000278093	0.00729796	5972	4675	3772	4685	5248	5030	5570	4928	3293.62	4923.77	3875.89	4646.02	5423.06	5187.03	4935.35	5086.2	Up Regulated
ENSG00000182518	ENSG00000182518.13	FAM104B	55143102	55161310	-1	mRNA	family with sequence similarity 104 member B [Source:HGNC Symbol;Acc:HGNC:25085]	116.061	-0.402481	0.139859	0.000278525	0.00729986	323	143	159	115	100	104	151	91	178.138	150.609	163.379	114.043	103.336	107.247	133.795	93.9212	Down Regulated
ENSG00000159733	ENSG00000159733.13	ZFYVE28	2269582	2418651	-1	mRNA	zinc finger FYVE-type containing 28 [Source:HGNC Symbol;Acc:HGNC:29334]	153.655	0.605406	0.222001	0.000279054	0.00730432	97	67	36	105	112	103	120	105	53.4966	70.5653	36.9916	104.126	115.736	106.215	106.327	108.371	Up Regulated
ENSG00000156504	ENSG00000156504.16	PABIR2	134769566	134797232	-1	mRNA	PABIR family member 2 [Source:HGNC Symbol;Acc:HGNC:30490]	554.631	-0.363639	0.125034	0.000281901	0.00736729	812	315	363	361	293	258	309	278	447.827	331.762	372.998	357.996	302.773	266.054	273.793	286.924	Down Regulated
ENSG00000101040	ENSG00000101040.19	ZMYND8	47209214	47356889	-1	mRNA	zinc finger MYND-type containing 8 [Source:HGNC Symbol;Acc:HGNC:9397]	983.658	0.235268	0.0753271	0.000282186	0.00736729	1122	772	799	821	908	926	995	866	618.796	813.08	821.007	814.169	938.288	954.908	881.63	893.8	Up Regulated
ENSG00000122557	ENSG00000122557.10	HERPUD2	35632659	35697459	-1	mRNA	HERPUD family member 2 [Source:HGNC Symbol;Acc:HGNC:21915]	750.947	0.227051	0.0722352	0.000282737	0.00737221	1155	810	688	956	913	900	1081	876	636.995	853.102	706.95	948.046	943.455	928.096	957.831	904.121	Up Regulated
ENSG00000198910	ENSG00000198910.13	L1CAM	153861514	153886173	-1	mRNA	L1 cell adhesion molecule [Source:HGNC Symbol;Acc:HGNC:6470]	27.1431	0.85279	0.321565	0.000286129	0.00745109	21	27	10	25	37	42	45	27	11.5817	28.4367	10.2754	24.792	38.2342	43.3112	39.8727	27.8667	Up Regulated
ENSG00000213523	ENSG00000213523.10	SRA1	140537340	140557677	-1	mRNA	steroid receptor RNA activator 1 [Source:HGNC Symbol;Acc:HGNC:11281]	1093.42	-0.277294	0.0913866	0.000288167	0.00749456	3295	1375	1289	1171	1093	1105	1298	1168	1817.23	1448.17	1324.5	1161.26	1129.46	1139.5	1150.11	1205.49	Down Regulated
ENSG00000049541	ENSG00000049541.11	RFC2	74231499	74254458	-1	mRNA	replication factor C subunit 2 [Source:HGNC Symbol;Acc:HGNC:9970]	580.008	-0.397989	0.139301	0.000289281	0.0075049	1545	637	768	509	496	491	558	508	852.085	670.897	789.154	504.765	512.545	506.328	494.422	524.308	Down Regulated
ENSG00000120458	ENSG00000120458.11	MSANTD2	124766498	124800706	-1	mRNA	Myb/SANT DNA binding domain containing 2 [Source:HGNC Symbol;Acc:HGNC:26266]	252.069	-0.328028	0.111077	0.000289534	0.0075049	614	254	278	229	209	211	268	188	338.628	267.516	285.657	227.095	215.972	217.587	237.464	194.035	Down Regulated
ENSG00000069956	ENSG00000069956.12	MAPK6	51952106	52067375	1	mRNA	mitogen-activated protein kinase 6 [Source:HGNC Symbol;Acc:HGNC:6879]	5426.64	0.249924	0.0809665	0.000289673	0.0075049	8381	4797	4450	5703	6043	5798	6811	5799	4622.22	5052.26	4572.57	5655.55	6244.57	5979	6034.96	5985.16	Up Regulated
ENSG00000050438	ENSG00000050438.17	SLC4A8	51391317	51515763	1	mRNA	solute carrier family 4 member 8 [Source:HGNC Symbol;Acc:HGNC:11034]	699.208	0.361059	0.124913	0.000291714	0.00754816	553	382	312	496	486	505	599	462	304.986	402.327	320.594	491.873	502.211	520.765	530.75	476.831	Up Regulated
ENSG00000185650	ENSG00000185650.9	ZFP36L1	68787660	68796253	-1	mRNA	ZFP36 ring finger protein like 1 [Source:HGNC Symbol;Acc:HGNC:1107]	3821.44	0.356684	0.123206	0.000294957	0.00762234	3442	2853	1932	3651	3591	3477	3800	3272	1898.3	3004.82	1985.21	3620.62	3710.78	3585.55	3367.03	3377.04	Up Regulated
ENSG00000165699	ENSG00000165699.14	TSC1	132891348	132946874	-1	mRNA	TSC complex subunit 1 [Source:HGNC Symbol;Acc:HGNC:12362]	1978.36	0.177689	0.0543974	0.000296948	0.00764462	3116	1690	1621	2092	2098	2090	2269	1891	1718.51	1779.93	1665.65	2074.59	2167.98	2155.25	2010.47	1951.7	Up Regulated
ENSG00000183598	ENSG00000183598.3	H3C13	149813225	149813693	-1	mRNA	H3 clustered histone 13 [Source:HGNC Symbol;Acc:HGNC:25311]	494.46	-1.01673	0.388901	0.000297585	0.00764929	1676	876	1148	407	299	294	487	392	924.333	922.614	1179.62	403.614	308.974	303.178	431.511	404.584	Down Regulated
ENSG00000188459	ENSG00000188459.4	WASF4P	47803296	47804789	1	mRNA	WASP family member 4, pseudogene [Source:HGNC Symbol;Acc:HGNC:20801]	636.096	0.250599	0.0815659	0.000297882	0.00764929	805	470	520	568	590	614	663	622	443.967	495.01	534.323	563.274	609.68	633.168	587.458	641.967	Up Regulated
ENSG00000123836	ENSG00000123836.15	PFKFB2	207034366	207081024	1	mRNA	6-phosphofructo-2-kinase/fructose-2,6-biphosphatase 2 [Source:HGNC Symbol;Acc:HGNC:8873]	481.343	0.268465	0.0894246	0.000299454	0.00766795	800	567	540	634	682	681	759	640	441.209	597.172	554.874	628.725	704.749	702.26	672.52	660.545	Up Regulated
ENSG00000198408	ENSG00000198408.14	OGA	101784443	101818465	-1	mRNA	O-GlcNAcase [Source:HGNC Symbol;Acc:HGNC:7056]	3787.54	0.309775	0.104714	0.000299742	0.00766795	3263	2854	2718	3714	3661	3552	3980	3380	1799.58	3005.87	2792.86	3683.1	3783.12	3662.89	3526.52	3488.5	Up Regulated
ENSG00000074935	ENSG00000074935.14	TUBE1	112070663	112087529	-1	mRNA	tubulin epsilon 1 [Source:HGNC Symbol;Acc:HGNC:20775]	509.34	-0.401297	0.141185	0.000301612	0.00770038	1187	467	476	393	386	301	456	338	654.644	491.85	489.111	389.73	398.876	310.397	404.043	348.85	Down Regulated
ENSG00000112294	ENSG00000112294.12	ALDH5A1	24494867	24537207	1	mRNA	aldehyde dehydrogenase 5 family member A1 [Source:HGNC Symbol;Acc:HGNC:408]	499.172	0.250201	0.0808494	0.000301767	0.00770038	686	477	435	552	572	513	657	542	378.337	502.383	446.981	547.407	591.08	529.015	582.141	559.399	Up Regulated
ENSG00000182628	ENSG00000182628.13	SKA2	59109857	59155260	-1	mRNA	spindle and kinetochore associated complex subunit 2 [Source:HGNC Symbol;Acc:HGNC:28006]	743.734	-0.387738	0.13605	0.000302264	0.00770337	1569	945	1113	733	696	626	741	671	865.321	995.286	1143.66	726.901	719.216	645.543	656.571	692.54	Down Regulated
ENSG00000169403	ENSG00000169403.12	PTAFR	28147166	28193936	-1	mRNA	platelet activating factor receptor [Source:HGNC Symbol;Acc:HGNC:9582]	328.534	-0.693221	0.259696	0.000306137	0.00779229	1996	308	528	266	248	290	360	364	1100.82	324.39	542.543	263.787	256.272	299.053	318.982	375.685	Down Regulated
ENSG00000117724	ENSG00000117724.13	CENPF	214603195	214664571	1	mRNA	centromere protein F [Source:HGNC Symbol;Acc:HGNC:1857]	6341.89	-0.404124	0.142987	0.000308329	0.00783826	9575	5306	8144	4547	4453	3891	4747	4082	5280.72	5588.35	8368.32	4509.17	4601.54	4012.47	4206.13	4213.04	Down Regulated
ENSG00000113648	ENSG00000113648.16	MACROH2A1	135334381	135399914	-1	mRNA	macroH2A.1 histone [Source:HGNC Symbol;Acc:HGNC:4740]	17099.9	0.195089	0.0608655	0.000309303	0.0078532	27252	19296	18309	22082	22149	21457	24473	21026	15029.8	20322.8	18813.3	21898.3	22887.8	22126.9	21684.5	21701	Up Regulated
ENSG00000161981	ENSG00000161981.10	SNRNP25	53828	57669	1	mRNA	small nuclear ribonucleoprotein U11/U12 subunit 25 [Source:HGNC Symbol;Acc:HGNC:14161]	496.995	-0.463348	0.167109	0.000310236	0.00786705	1450	671	818	508	454	479	562	467	799.691	706.706	840.531	503.773	469.144	493.954	497.966	481.991	Down Regulated
ENSG00000165490	ENSG00000165490.13	DDIAS	82899975	82958277	1	mRNA	DNA damage induced apoptosis suppressor [Source:HGNC Symbol;Acc:HGNC:26351]	278.052	-0.446941	0.160536	0.000312161	0.00789616	620	335	415	205	249	192	257	225	341.937	352.826	426.431	203.294	257.306	197.994	227.717	232.223	Down Regulated
ENSG00000120029	ENSG00000120029.13	ARMH3	101845599	102056193	-1	mRNA	armadillo like helical domain containing 3 [Source:HGNC Symbol;Acc:HGNC:25788]	478.759	0.247697	0.0809395	0.000315308	0.00795594	453	295	282	297	356	300	406	330	249.835	310.698	289.767	294.529	367.875	309.365	359.74	340.594	Up Regulated
ENSG00000284946	ENSG00000284946.1		90966190	91022566	-1	mRNA	novel protein	159.033	-0.423706	0.151721	0.000318646	0.00801681	254	164	215	127	139	103	114	108	140.084	172.727	220.922	125.943	143.637	106.215	101.011	111.467	Down Regulated
ENSG00000186767	ENSG00000186767.6	SPIN4	63347228	63351332	-1	mRNA	spindlin family member 4 [Source:HGNC Symbol;Acc:HGNC:27040]	303.775	-0.368261	0.128927	0.000318863	0.00801681	463	237	337	203	197	142	215	230	255.35	249.611	346.282	201.311	203.571	146.433	190.503	237.383	Down Regulated
ENSG00000182487	ENSG00000182487.12	NCF1B	73220624	73235945	1	mRNA	neutrophil cytosolic factor 1B pseudogene [Source:HGNC Symbol;Acc:HGNC:32522]	89.9931	0.785612	0.300208	0.000319362	0.00801841	30	33	19	37	46	62	59	39	16.5453	34.756	19.5233	36.6922	47.5344	63.9355	52.2775	40.252	Up Regulated
ENSG00000139289	ENSG00000139289.13	PHLDA1	76025447	76031776	-1	mRNA	pleckstrin homology like domain family A member 1 [Source:HGNC Symbol;Acc:HGNC:8933]	18194.5	0.397361	0.140962	0.000321269	0.00805631	15167	9811	8341	14327	14388	14020	15792	13754	8364.77	10333.1	8570.74	14207.8	14867.9	14457.7	13992.7	14195.5	Up Regulated
ENSG00000135747	ENSG00000135747.11	ZNF670-ZNF695	246945547	247078811	-1	mRNA	ZNF670-ZNF695 readthrough (NMD candidate) [Source:HGNC Symbol;Acc:HGNC:49200]	38.6828	-0.814617	0.306239	0.000326852	0.00818621	47	34	29	26	17	15	22	5	25.921	35.8092	29.7988	25.7837	17.5671	15.4683	19.4933	5.16051	Down Regulated
ENSG00000081026	ENSG00000081026.19	MAGI3	113390515	113685923	1	mRNA	membrane associated guanylate kinase, WW and PDZ domain containing 3 [Source:HGNC Symbol;Acc:HGNC:29647]	476.979	-0.308438	0.104992	0.000327574	0.00819418	937	395	560	298	377	291	388	367	516.766	416.019	575.424	295.521	389.575	300.085	343.791	378.781	Down Regulated
ENSG00000198830	ENSG00000198830.11	HMGN2	26472440	26476642	1	mRNA	high mobility group nucleosomal binding domain 2 [Source:HGNC Symbol;Acc:HGNC:4986]	2534.57	-0.342188	0.118816	0.000328554	0.00819853	6471	3249	4137	2756	2553	2385	3182	2577	3568.83	3421.89	4250.95	2733.07	2638.16	2459.46	2819.44	2659.73	Down Regulated
ENSG00000169607	ENSG00000169607.13	CKAP2L	112736349	112764664	-1	mRNA	cytoskeleton associated protein 2 like [Source:HGNC Symbol;Acc:HGNC:26877]	407.026	-0.481625	0.176088	0.000329143	0.00820313	693	474	619	354	315	312	324	305	382.197	499.223	636.05	351.055	325.507	321.74	287.083	314.791	Down Regulated
ENSG00000118689	ENSG00000118689.15	FOXO3	108559835	108684774	1	mRNA	forkhead box O3 [Source:HGNC Symbol;Acc:HGNC:3821]	5518.45	0.240972	0.0786907	0.000334578	0.00832372	7666	4435	4810	5628	5846	5696	6289	5813	4227.88	4671	4942.49	5581.18	6041	5873.82	5572.43	5999.61	Up Regulated
ENSG00000119408	ENSG00000119408.16	NEK6	124257606	124353307	1	mRNA	NIMA related kinase 6 [Source:HGNC Symbol;Acc:HGNC:7749]	7214.68	0.265827	0.0884262	0.000335287	0.00832372	9512	5889	5169	7487	7383	7241	8159	7328	5245.97	6202.37	5311.37	7424.71	7629.27	7467.05	7229.36	7563.24	Up Regulated
ENSG00000161980	ENSG00000161980.5	POLR3K	46407	53608	-1	mRNA	RNA polymerase III subunit K [Source:HGNC Symbol;Acc:HGNC:14121]	181.468	-0.318595	0.109229	0.000335501	0.00832372	373	179	212	160	143	136	179	146	205.714	188.525	217.839	158.669	147.77	140.246	158.605	150.687	Down Regulated
ENSG00000241634	ENSG00000241634.1		108543367	108543875	-1	mRNA	ribosomal protein L13 (RPL13) pseudogene	48.7791	-0.570722	0.210956	0.000335621	0.00832372	110	44	67	40	28	36	35	37	60.6662	46.3414	68.8454	39.6672	28.934	37.1239	31.0121	38.1878	Down Regulated
ENSG00000155011	ENSG00000155011.9	DKK2	106921802	107283806	-1	mRNA	dickkopf WNT signaling pathway inhibitor 2 [Source:HGNC Symbol;Acc:HGNC:2892]	606.49	-0.329541	0.113997	0.000337575	0.00836198	1595	738	797	769	607	601	680	612	879.66	777.271	818.952	762.602	627.247	619.762	602.521	631.646	Down Regulated
ENSG00000136026	ENSG00000136026.14	CKAP4	106237881	106304279	-1	mRNA	cytoskeleton associated protein 4 [Source:HGNC Symbol;Acc:HGNC:16991]	888.74	0.384652	0.136769	0.000340811	0.00843185	1533	916	770	1256	1280	1282	1458	1297	845.467	964.743	791.209	1245.55	1322.7	1322.02	1291.88	1338.64	Up Regulated
ENSG00000149050	ENSG00000149050.10	ZNF214	6997085	7020346	-1	mRNA	zinc finger protein 214 [Source:HGNC Symbol;Acc:HGNC:13006]	23.2222	-0.0573982	0.135585	0.000342876	0.00847263	5	2	3	4	0	0	0	0	2.75756	2.10643	3.08263	3.96672	0	0	0	0	Down Regulated
ENSG00000122378	ENSG00000122378.14	PRXL2A	80407829	80437115	1	mRNA	peroxiredoxin like 2A [Source:HGNC Symbol;Acc:HGNC:28651]	904.613	0.259916	0.0865608	0.000348131	0.00859202	1044	668	695	959	898	877	1008	852	575.778	703.546	714.143	951.021	927.954	904.378	893.149	879.351	Up Regulated
ENSG00000077585	ENSG00000077585.14	GPR137B	236142505	236221865	1	mRNA	G protein-coupled receptor 137B [Source:HGNC Symbol;Acc:HGNC:11862]	585.62	0.285471	0.0978652	0.000348891	0.00860033	673	422	462	474	550	525	615	537	371.167	444.456	474.725	470.056	568.346	541.39	544.927	554.239	Up Regulated
ENSG00000146243	ENSG00000146243.14	IRAK1BP1	78867551	78946440	1	mRNA	interleukin 1 receptor associated kinase 1 binding protein 1 [Source:HGNC Symbol;Acc:HGNC:17368]	913.012	-0.328358	0.111253	0.00035136	0.00863939	2730	1091	1351	923	980	912	1059	906	1505.63	1149.06	1388.21	915.321	1012.69	940.471	938.338	935.084	Down Regulated
ENSG00000119185	ENSG00000119185.12	ITGB1BP1	9403475	9423528	-1	mRNA	integrin subunit beta 1 binding protein 1 [Source:HGNC Symbol;Acc:HGNC:23927]	1733.63	0.258643	0.0860993	0.000351569	0.00863939	2079	1636	1399	1981	1935	1877	2121	1812	1146.59	1723.06	1437.53	1964.52	1999.54	1935.6	1879.33	1870.17	Up Regulated
ENSG00000136875	ENSG00000136875.12	PRPF4	113275642	113294009	1	mRNA	pre-mRNA processing factor 4 [Source:HGNC Symbol;Acc:HGNC:17349]	1273.27	-0.204102	0.0646893	0.000351751	0.00863939	3047	1391	1495	1331	1198	1261	1468	1257	1680.45	1465.02	1536.18	1319.93	1237.96	1300.37	1300.74	1297.35	Down Regulated
ENSG00000254244	ENSG00000254244.1	PAICSP4	4787332	4788584	1	mRNA	phosphoribosylaminoimidazole carboxylase, phosphoribosylaminoimidazole succinocarboxamide synthetase pseudogene 4 [Source:HGNC Symbol;Acc:HGNC:38097]	498.101	-0.347058	0.121575	0.000352786	0.00865433	1365	501	592	421	386	409	490	476	752.813	527.66	608.306	417.497	398.876	421.768	434.169	491.28	Down Regulated
ENSG00000187240	ENSG00000187240.15	DYNC2H1	103109410	103479863	1	mRNA	dynein cytoplasmic 2 heavy chain 1 [Source:HGNC Symbol;Acc:HGNC:2962]	862.175	-0.298872	0.102072	0.000353535	0.00866224	1683	734	856	615	610	605	728	595	928.193	773.058	879.577	609.883	630.347	623.887	645.052	614.1	Down Regulated
ENSG00000152270	ENSG00000152270.9	PDE3B	14643804	14872044	1	mRNA	phosphodiesterase 3B [Source:HGNC Symbol;Acc:HGNC:8779]	4445.15	0.325589	0.113136	0.000355556	0.0086908	7382	4346	4513	6307	6251	6044	7263	6135	4071.26	4577.26	4637.3	6254.53	6459.51	6232.68	6435.45	6331.94	Up Regulated
ENSG00000169288	ENSG00000169288.18	MRPL1	77862830	77952785	1	mRNA	mitochondrial ribosomal protein L1 [Source:HGNC Symbol;Acc:HGNC:14275]	311.856	-0.293188	0.0997615	0.000356245	0.00869718	747	363	323	327	296	243	328	295	411.979	382.316	331.897	324.279	305.874	250.586	290.628	304.47	Down Regulated
ENSG00000153044	ENSG00000153044.10	CENPH	69189574	69210357	1	mRNA	centromere protein H [Source:HGNC Symbol;Acc:HGNC:17268]	210.631	-0.343588	0.123478	0.000357015	0.00870552	617	248	347	236	230	191	257	229	340.282	261.197	356.558	234.036	237.672	196.963	227.717	236.351	Down Regulated
ENSG00000102781	ENSG00000102781.14	KATNAL1	30202630	30307551	-1	mRNA	katanin catalytic subunit A1 like 1 [Source:HGNC Symbol;Acc:HGNC:28361]	343.278	-0.35429	0.124979	0.000358099	0.00872147	610	332	412	285	257	245	309	240	336.422	349.667	423.348	282.629	265.573	252.648	273.793	247.704	Down Regulated
ENSG00000138759	ENSG00000138759.19	FRAS1	78057323	78544269	1	mRNA	Fraser extracellular matrix complex subunit 1 [Source:HGNC Symbol;Acc:HGNC:19185]	29.9966	-1.10864	0.429397	0.000361305	0.00878901	50	39	31	11	6	5	19	14	27.5756	41.0753	31.8539	10.9085	6.20014	5.15609	16.8351	14.4494	Down Regulated
ENSG00000083123	ENSG00000083123.15	BCKDHB	80106647	80346270	1	mRNA	branched chain keto acid dehydrogenase E1 subunit beta [Source:HGNC Symbol;Acc:HGNC:987]	325.757	-0.293205	0.100268	0.000362653	0.00879149	848	333	370	303	305	266	331	302	467.682	350.72	380.191	300.479	315.174	274.304	293.286	311.695	Down Regulated
ENSG00000275126	ENSG00000275126.1	H4C13	27873148	27873534	-1	mRNA	H4 clustered histone 13 [Source:HGNC Symbol;Acc:HGNC:4791]	510.871	-0.770005	0.298382	0.000362799	0.00879149	1431	887	1037	498	381	390	501	451	789.213	934.2	1065.56	493.857	393.709	402.175	443.916	465.478	Down Regulated
ENSG00000131747	ENSG00000131747.15	TOP2A	40388525	40417896	-1	mRNA	DNA topoisomerase II alpha [Source:HGNC Symbol;Acc:HGNC:11989]	4296.4	-0.484508	0.179504	0.000363385	0.00879149	8450	5902	7840	4198	4125	3408	4111	3861	4660.27	6216.06	8055.94	4163.07	4262.6	3514.39	3642.59	3984.94	Down Regulated
ENSG00000136159	ENSG00000136159.4	NUDT15	48037726	48047221	1	mRNA	nudix hydrolase 15 [Source:HGNC Symbol;Acc:HGNC:23063]	446.993	-0.298371	0.102247	0.000363667	0.00879149	934	464	551	459	351	363	466	428	515.111	488.691	566.177	455.181	362.708	374.332	412.904	441.74	Down Regulated
ENSG00000050030	ENSG00000050030.15	NEXMIF	74732856	74925472	-1	mRNA	neurite extension and migration factor [Source:HGNC Symbol;Acc:HGNC:29433]	69.7082	-0.681375	0.255597	0.000364004	0.00879149	261	55	88	48	47	50	55	46	143.944	57.9267	90.4238	47.6006	48.5678	51.5609	48.7333	47.4767	Down Regulated
ENSG00000171658	ENSG00000171658.8	NMRAL2P	185959943	185980872	1	mRNA	NmrA like redox sensor 2, pseudogene [Source:HGNC Symbol;Acc:HGNC:52332]	54.3303	0.80403	0.312948	0.000367325	0.00886117	82	31	24	133	127	113	111	114	45.2239	32.6496	24.661	131.893	131.236	116.528	98.3527	117.66	Up Regulated
ENSG00000094916	ENSG00000094916.16	CBX5	54230942	54280133	-1	mRNA	chromobox 5 [Source:HGNC Symbol;Acc:HGNC:1555]	10473.8	-0.334721	0.117455	0.000371309	0.00894585	17655	7830	10391	6750	6407	6293	7372	7043	9736.93	8246.66	10677.2	6693.84	6620.72	6489.46	6532.04	7269.09	Down Regulated
ENSG00000070759	ENSG00000070759.17	TESK2	45343883	45491163	-1	mRNA	testis associated actin remodelling kinase 2 [Source:HGNC Symbol;Acc:HGNC:11732]	359.624	0.288446	0.0987861	0.000371716	0.00894585	503	353	390	473	450	466	566	436	277.41	371.784	400.742	469.065	465.01	480.548	501.51	449.996	Up Regulated
ENSG00000108424	ENSG00000108424.10	KPNB1	47649476	47685505	1	mRNA	karyopherin subunit beta 1 [Source:HGNC Symbol;Acc:HGNC:6400]	8243.35	-0.224802	0.0734122	0.000381728	0.00915438	20879	9239	10289	7909	7875	7896	9386	8386	11515	9730.63	10572.4	7843.2	8137.68	8142.5	8316.56	8655.2	Down Regulated
ENSG00000157240	ENSG00000157240.3	FZD1	91264433	91271326	1	mRNA	frizzled class receptor 1 [Source:HGNC Symbol;Acc:HGNC:4038]	555.549	-0.303436	0.105038	0.000385099	0.00921335	1102	655	640	463	427	441	531	505	607.765	689.854	657.628	459.148	441.243	454.767	470.498	521.211	Down Regulated
ENSG00000133794	ENSG00000133794.17	ARNTL	13276652	13387266	1	mRNA	aryl hydrocarbon receptor nuclear translocator like [Source:HGNC Symbol;Acc:HGNC:701]	1113.19	0.178255	0.0560121	0.000390374	0.00932331	1754	1067	1012	1188	1263	1219	1357	1123	967.351	1123.78	1039.87	1178.12	1305.13	1257.06	1202.38	1159.05	Up Regulated
ENSG00000177238	ENSG00000177238.14	TRIM72	31214091	31231537	1	mRNA	tripartite motif containing 72 [Source:HGNC Symbol;Acc:HGNC:32671]	43.2563	0.590873	0.22471	0.000390613	0.00932331	37	29	35	33	58	41	45	47	20.4059	30.5432	35.964	32.7254	59.9347	42.2799	39.8727	48.5088	Up Regulated
ENSG00000164674	ENSG00000164674.15	SYTL3	158650014	158764876	1	mRNA	synaptotagmin like 3 [Source:HGNC Symbol;Acc:HGNC:15587]	381.761	-0.460437	0.170661	0.000396164	0.00943477	1008	293	277	218	197	211	277	263	555.923	308.591	284.63	216.186	203.571	217.587	245.439	271.443	Down Regulated
ENSG00000112232	ENSG00000112232.9	KHDRBS2	61679961	62286225	-1	mRNA	KH RNA binding domain containing, signal transduction associated 2 [Source:HGNC Symbol;Acc:HGNC:18114]	31.8984	-0.751661	0.286865	0.000396212	0.00943477	130	24	38	25	20	23	28	19	71.6965	25.2771	39.0467	24.792	20.6671	23.718	24.8097	19.6099	Down Regulated
ENSG00000213186	ENSG00000213186.8	TRIM59	160432445	160485773	-1	mRNA	tripartite motif containing 59 [Source:HGNC Symbol;Acc:HGNC:30834]	628.244	-0.386877	0.140389	0.000397688	0.00945883	1223	747	862	650	581	467	597	542	674.498	786.75	885.743	644.592	600.38	481.579	528.978	559.399	Down Regulated
ENSG00000065609	ENSG00000065609.14	SNAP91	83552880	83709691	-1	mRNA	synaptosome associated protein 91 [Source:HGNC Symbol;Acc:HGNC:14986]	90.051	0.616612	0.238416	0.000398828	0.00947486	103	60	74	215	166	146	225	157	56.8057	63.1928	76.0382	213.211	171.537	150.558	199.364	162.04	Up Regulated
ENSG00000276903	ENSG00000276903.1	H2AC16	27865317	27865798	1	mRNA	H2A clustered histone 16 [Source:HGNC Symbol;Acc:HGNC:4730]	381.606	-1.02663	0.410839	0.000399659	0.0094835	831	533	584	234	171	162	252	193	458.306	561.362	600.086	232.053	176.704	167.057	223.287	199.196	Down Regulated
ENSG00000109084	ENSG00000109084.14	TMEM97	28319200	28328685	1	mRNA	transmembrane protein 97 [Source:HGNC Symbol;Acc:HGNC:28106]	786.196	-0.290554	0.100224	0.000401987	0.0095276	2002	950	1140	816	812	731	887	829	1104.13	1000.55	1171.4	809.211	839.085	753.821	785.935	855.612	Down Regulated
ENSG00000164466	ENSG00000164466.13	SFXN1	175477062	175529742	1	mRNA	sideroflexin 1 [Source:HGNC Symbol;Acc:HGNC:16085]	865.454	-0.221555	0.0727178	0.000403251	0.00954642	2161	1053	1142	937	931	878	1018	907	1191.82	1109.03	1173.45	929.204	962.055	905.41	902.009	936.116	Down Regulated
ENSG00000168468	ENSG00000168468.12	ATF6B	32091037	32104024	-1	mRNA	activating transcription factor 6 beta [Source:HGNC Symbol;Acc:HGNC:2349]	96.5708	0.404076	0.148393	0.00040617	0.00960433	122	89	72	102	125	107	136	99	67.2844	93.7359	73.9831	101.151	129.17	110.34	120.504	102.178	Up Regulated
ENSG00000166451	ENSG00000166451.13	CENPN	81006552	81033114	1	mRNA	centromere protein N [Source:HGNC Symbol;Acc:HGNC:30873]	374.847	-0.411244	0.151118	0.000407096	0.00961504	795	463	616	316	332	285	389	336	438.451	487.638	632.967	313.371	343.074	293.897	344.677	346.786	Down Regulated
ENSG00000253173	ENSG00000253173.3	H2AZP2	70103798	70104179	-1	mRNA	H2A.Z histone pseudogene 2 [Source:HGNC Symbol;Acc:HGNC:32279]	182.113	-0.446659	0.163463	0.000407947	0.00962394	268	200	247	184	124	145	159	123	147.805	210.643	253.803	182.469	128.136	149.527	140.884	126.949	Down Regulated
ENSG00000158457	ENSG00000158457.6	TSPAN33	129144707	129169699	1	mRNA	tetraspanin 33 [Source:HGNC Symbol;Acc:HGNC:28743]	248.748	-0.313969	0.110511	0.000408451	0.00962466	650	358	341	289	212	272	326	265	358.482	377.05	350.392	286.596	219.072	280.491	288.856	273.507	Down Regulated
ENSG00000133961	ENSG00000133961.20	NUMB	73275107	73458617	-1	mRNA	NUMB endocytic adaptor protein [Source:HGNC Symbol;Acc:HGNC:8060]	3121.96	0.339725	0.121032	0.000409675	0.00964231	2605	2127	2035	2697	2710	2782	3072	2664	1436.69	2240.18	2091.05	2674.56	2800.4	2868.85	2721.98	2749.52	Up Regulated
ENSG00000079335	ENSG00000079335.20	CDC14A	100345001	100520277	1	mRNA	cell division cycle 14A [Source:HGNC Symbol;Acc:HGNC:1718]	516.373	-0.224162	0.0736848	0.000410314	0.0096435	818	410	501	402	366	398	411	343	451.136	431.817	514.799	398.655	378.208	410.425	364.171	354.011	Down Regulated
ENSG00000138160	ENSG00000138160.6	KIF11	92574105	92655395	1	mRNA	kinesin family member 11 [Source:HGNC Symbol;Acc:HGNC:6388]	1013.29	-0.40378	0.148123	0.000411143	0.0096435	1397	796	1069	599	526	518	697	643	770.461	838.357	1098.44	594.016	543.546	534.171	617.584	663.641	Down Regulated
ENSG00000075218	ENSG00000075218.19	GTSE1	46296870	46330810	1	mRNA	G2 and S-phase expressed 1 [Source:HGNC Symbol;Acc:HGNC:13698]	391.045	-0.530285	0.202433	0.000413996	0.0096692	533	382	525	264	244	230	244	242	293.955	402.327	539.46	261.804	252.139	237.18	216.199	249.769	Down Regulated
ENSG00000119326	ENSG00000119326.15	CTNNAL1	108942569	109013522	-1	mRNA	catenin alpha like 1 [Source:HGNC Symbol;Acc:HGNC:2512]	319.657	-0.353839	0.12681	0.000414044	0.0096692	954	432	542	331	341	312	388	369	526.142	454.988	556.929	328.246	352.375	321.74	343.791	380.846	Down Regulated
ENSG00000221955	ENSG00000221955.10	SLC12A8	125082636	125212864	-1	mRNA	solute carrier family 12 member 8 [Source:HGNC Symbol;Acc:HGNC:15595]	1077.38	0.619522	0.2406	0.000414065	0.0096692	467	581	540	1179	1101	1107	1132	1065	257.556	611.917	554.874	1169.19	1137.73	1141.56	1003.02	1099.19	Up Regulated
ENSG00000116251	ENSG00000116251.11	RPL22	6185020	6209389	-1	mRNA	ribosomal protein L22 [Source:HGNC Symbol;Acc:HGNC:10315]	2044.55	0.205046	0.0663523	0.000414149	0.0096692	4447	2243	2149	2634	2705	2668	3264	2783	2452.57	2362.36	2208.19	2612.09	2795.23	2751.29	2892.1	2872.34	Up Regulated
ENSG00000160051	ENSG00000160051.11	IQCC	32205671	32208682	1	mRNA	IQ motif containing C [Source:HGNC Symbol;Acc:HGNC:25545]	153.867	-0.380996	0.138983	0.00042039	0.00980362	290	196	220	157	123	140	149	134	159.938	206.43	226.06	155.694	127.103	144.371	132.023	138.302	Down Regulated
ENSG00000119640	ENSG00000119640.9	ACYP1	75053237	75069483	-1	mRNA	acylphosphatase 1 [Source:HGNC Symbol;Acc:HGNC:179]	149.875	-0.345075	0.123182	0.000421304	0.00981368	354	166	185	143	125	122	165	126	195.235	174.833	190.096	141.81	129.17	125.809	146.2	130.045	Down Regulated
ENSG00000060688	ENSG00000060688.13	SNRNP40	31259568	31296788	-1	mRNA	small nuclear ribonucleoprotein U5 subunit 40 [Source:HGNC Symbol;Acc:HGNC:30857]	1131.33	-0.196931	0.063356	0.000424386	0.00987415	3062	1377	1460	1235	1188	1202	1405	1296	1688.73	1450.27	1500.21	1224.72	1227.63	1239.52	1244.91	1337.6	Down Regulated
ENSG00000177602	ENSG00000177602.5	HASPIN	3723903	3726699	1	mRNA	histone H3 associated protein kinase [Source:HGNC Symbol;Acc:HGNC:19682]	160.843	-0.438278	0.16393	0.000429611	0.00997288	301	182	245	131	123	119	116	154	166.005	191.685	251.748	129.91	127.103	122.715	102.783	158.944	Down Regulated
ENSG00000164393	ENSG00000164393.8	ADGRF2	47656487	47695192	1	mRNA	adhesion G protein-coupled receptor F2 [Source:HGNC Symbol;Acc:HGNC:18991]	6.86207	-1.73282	0.686639	0.000430648	0.00997736	61	20	11	3	9	3	4	0	33.6422	21.0643	11.303	2.97504	9.30021	3.09365	3.54424	0	Down Regulated
ENSG00000214517	ENSG00000214517.10	PPME1	74171267	74254703	1	mRNA	protein phosphatase methylesterase 1 [Source:HGNC Symbol;Acc:HGNC:30178]	807.431	-0.209349	0.0682817	0.000430787	0.00997736	1311	684	787	675	628	609	705	559	723.031	720.398	808.677	669.384	648.948	628.012	624.672	576.945	Down Regulated
ENSG00000148358	ENSG00000148358.19	GPR107	130053426	130140169	1	mRNA	G protein-coupled receptor 107 [Source:HGNC Symbol;Acc:HGNC:17830]	1905.52	0.129321	0.0391171	0.000431991	0.00999385	3330	1691	1827	2058	1999	1997	2285	2077	1836.53	1780.98	1877.32	2040.88	2065.68	2059.34	2024.65	2143.68	Up Regulated
ENSG00000181458	ENSG00000181458.10	TMEM45A	100492619	100577444	1	mRNA	transmembrane protein 45A [Source:HGNC Symbol;Acc:HGNC:25480]	110.393	-0.479213	0.181801	0.000432614	0.00999688	373	272	304	186	161	165	168	168	205.714	286.474	312.373	184.452	166.37	170.151	148.858	173.393	Down Regulated
ENSG00000218418	ENSG00000218418.2		80064286	80070199	-1	mRNA	Rho GTPase activating protein 21 (ARHGAP21) pseudogene	298.431	-0.321355	0.114006	0.000433877	0.0100147	338	188	221	170	157	143	154	148	186.411	198.004	227.087	168.586	162.237	147.464	136.453	152.751	Down Regulated
ENSG00000235330	ENSG00000235330.2	RPL12P25	477750	478423	1	mRNA	ribosomal protein L12 pseudogene 25 [Source:HGNC Symbol;Acc:HGNC:37008]	47.1181	-0.792429	0.309699	0.000435285	0.0100358	43	29	28	22	14	14	11	14	23.715	30.5432	28.7712	21.817	14.467	14.4371	9.74666	14.4494	Down Regulated
ENSG00000239306	ENSG00000239306.4	RBM14	66616626	66629934	1	mRNA	RNA binding motif protein 14 [Source:HGNC Symbol;Acc:HGNC:14219]	2201.24	-0.336212	0.120504	0.000440552	0.0101361	5190	1975	2326	1536	1510	1659	1974	1655	2862.34	2080.1	2390.07	1523.22	1560.37	1710.79	1749.08	1708.13	Down Regulated
ENSG00000106868	ENSG00000106868.16	SUSD1	112040783	112175297	-1	mRNA	sushi domain containing 1 [Source:HGNC Symbol;Acc:HGNC:25413]	782.538	0.223076	0.0739178	0.000440633	0.0101361	1125	643	730	803	810	833	942	821	620.45	677.216	750.107	796.319	837.019	859.005	834.669	847.355	Up Regulated
ENSG00000184083	ENSG00000184083.12	FAM120C	54068324	54183281	-1	mRNA	family with sequence similarity 120C [Source:HGNC Symbol;Acc:HGNC:16949]	428.94	-0.315503	0.111748	0.000452763	0.010393	756	273	348	255	259	238	307	233	416.942	287.527	357.585	252.878	267.639	245.43	272.02	240.48	Down Regulated
ENSG00000147872	ENSG00000147872.10	PLIN2	19108375	19149290	-1	mRNA	perilipin 2 [Source:HGNC Symbol;Acc:HGNC:248]	12283.6	0.245503	0.0830508	0.000452827	0.010393	23009	12600	11840	16549	16368	15782	18681	16075	12689.7	13270.5	12166.1	16411.3	16914	16274.7	16552.5	16591	Up Regulated
ENSG00000184220	ENSG00000184220.12	CMSS1	99817837	100181732	1	mRNA	cms1 ribosomal small subunit homolog [Source:HGNC Symbol;Acc:HGNC:28666]	351.364	-0.310096	0.108283	0.000455605	0.010445	750	286	344	305	271	270	299	245	413.633	301.219	353.475	302.462	280.04	278.429	264.932	252.865	Down Regulated
ENSG00000020577	ENSG00000020577.13	SAMD4A	54566117	54793315	1	mRNA	sterile alpha motif domain containing 4A [Source:HGNC Symbol;Acc:HGNC:23023]	1329.07	0.474683	0.181293	0.000459661	0.010521	1004	1172	1002	1859	1707	1694	1925	1672	553.717	1234.37	1029.6	1843.53	1763.94	1746.88	1705.67	1725.67	Up Regulated
ENSG00000232549	ENSG00000232549.1	SRD5A1P1	139446891	139447676	1	mRNA	steroid 5 alpha-reductase 1 pseudogene 1 [Source:HGNC Symbol;Acc:HGNC:11286]	53.8536	0.442041	0.167339	0.000459982	0.010521	71	56	52	58	82	76	82	57	39.1573	58.9799	53.4323	57.5174	84.7352	78.3726	72.6569	58.8298	Up Regulated
ENSG00000100014	ENSG00000100014.20	SPECC1L	24270817	24417739	1	mRNA	sperm antigen with calponin homology and coiled-coil domains 1 like [Source:HGNC Symbol;Acc:HGNC:29022]	463.844	-0.281968	0.0965902	0.000460508	0.010521	1010	416	508	345	340	344	436	389	557.026	438.137	521.992	342.13	351.341	354.739	386.322	401.488	Down Regulated
ENSG00000274070	ENSG00000274070.1	CASTOR2	74964705	75031528	1	mRNA	cytosolic arginine sensor for mTORC1 subunit 2 [Source:HGNC Symbol;Acc:HGNC:37073]	50.4321	0.703335	0.284163	0.000460993	0.010521	48	25	34	21	55	56	54	36	26.4725	26.3303	34.9365	20.8253	56.8346	57.7482	47.8472	37.1557	Up Regulated
ENSG00000126947	ENSG00000126947.12	ARMCX1	101550547	101554700	1	mRNA	armadillo repeat containing X-linked 1 [Source:HGNC Symbol;Acc:HGNC:18073]	753.334	0.206131	0.0679896	0.000463969	0.010577	1313	823	733	933	897	914	1107	949	724.134	866.794	753.19	925.237	926.921	942.534	980.869	979.464	Up Regulated
ENSG00000151876	ENSG00000151876.13	FBXO4	41925254	41941743	1	mRNA	F-box protein 4 [Source:HGNC Symbol;Acc:HGNC:13583]	699.518	-0.257637	0.0881582	0.000465067	0.0105902	1365	653	641	567	551	520	610	510	752.813	687.748	658.655	562.283	569.379	536.234	540.497	526.372	Down Regulated
ENSG00000135363	ENSG00000135363.12	LMO2	33858576	33892076	-1	mRNA	LIM domain only 2 [Source:HGNC Symbol;Acc:HGNC:6642]	4138.4	0.241961	0.0819761	0.000469876	0.0106875	6137	4975	4768	5496	5428	5577	6565	5627	3384.62	5239.73	4899.33	5450.27	5609.06	5751.1	5816.98	5807.64	Up Regulated
ENSG00000097033	ENSG00000097033.14	SH3GLB1	86704570	86748184	1	mRNA	SH3 domain containing GRB2 like, endophilin B1 [Source:HGNC Symbol;Acc:HGNC:10833]	7434.49	0.288484	0.101268	0.000470391	0.0106875	7725	6934	6040	8022	8109	7823	9031	7794	4260.42	7302.98	6206.36	7955.26	8379.49	8067.22	8002.01	8044.2	Up Regulated
ENSG00000169689	ENSG00000169689.15	CENPX	82018702	82024107	-1	mRNA	centromere protein X [Source:HGNC Symbol;Acc:HGNC:11422]	360.257	-0.489341	0.188307	0.000475544	0.0107804	1032	489	516	337	267	327	375	334	569.16	515.021	530.213	334.196	275.906	337.208	332.273	344.722	Down Regulated
ENSG00000051108	ENSG00000051108.15	HERPUD1	56932142	56944864	1	mRNA	homocysteine inducible ER protein with ubiquitin like domain 1 [Source:HGNC Symbol;Acc:HGNC:13744]	1965.46	0.136186	0.0460326	0.000478808	0.0108422	3294	1668	1647	2122	2047	1977	2398	1905	1816.68	1756.76	1692.36	2104.35	2115.28	2038.72	2124.77	1966.15	Up Regulated
ENSG00000144034	ENSG00000144034.14	TPRKB	73729104	73737400	-1	mRNA	TP53RK binding protein [Source:HGNC Symbol;Acc:HGNC:24259]	333.003	-0.304781	0.107559	0.000479336	0.0108422	928	403	471	398	370	330	421	316	511.802	424.445	483.973	394.689	382.342	340.302	373.031	326.144	Down Regulated
ENSG00000103811	ENSG00000103811.16	CTSH	78921058	78949574	-1	mRNA	cathepsin H [Source:HGNC Symbol;Acc:HGNC:2535]	4890.11	0.255105	0.0875515	0.000481409	0.0108649	11666	5708	5065	7281	7159	7539	8960	7181	6433.93	6011.74	5204.51	7220.42	7397.8	7774.35	7939.1	7411.52	Up Regulated
ENSG00000180385	ENSG00000180385.8	EMC3-AS1	9986885	10006990	1	mRNA	EMC3 antisense RNA 1 [Source:HGNC Symbol;Acc:HGNC:49223]	335.175	-0.356192	0.130175	0.000482072	0.0108678	739	245	359	232	237	238	249	232	407.567	258.037	368.888	230.07	244.905	245.43	220.629	239.448	Down Regulated
ENSG00000129810	ENSG00000129810.15	SGO1	20160593	20186206	-1	mRNA	shugoshin 1 [Source:HGNC Symbol;Acc:HGNC:25088]	250.805	-0.452129	0.172618	0.000483203	0.0108812	396	242	350	175	174	143	198	177	218.398	254.878	359.64	173.544	179.804	147.464	175.44	182.682	Down Regulated
ENSG00000035499	ENSG00000035499.13	DEPDC1B	60596912	60700190	-1	mRNA	DEP domain containing 1B [Source:HGNC Symbol;Acc:HGNC:24902]	392.137	-0.437835	0.16672	0.000487341	0.0109622	514	459	514	274	285	246	298	259	283.477	483.425	528.157	271.72	294.507	253.68	264.046	267.314	Down Regulated
ENSG00000168710	ENSG00000168710.18	AHCYL1	109984765	110023742	1	mRNA	adenosylhomocysteinase like 1 [Source:HGNC Symbol;Acc:HGNC:344]	2594.47	0.208912	0.0690163	0.000489224	0.0109924	3681	1936	1981	2336	2334	2428	2859	2393	2030.11	2039.02	2035.56	2316.56	2411.85	2503.8	2533.25	2469.82	Up Regulated
ENSG00000137414	ENSG00000137414.6	FAM8A1	17600302	17611719	1	mRNA	family with sequence similarity 8 member A1 [Source:HGNC Symbol;Acc:HGNC:16372]	456.903	0.283675	0.100206	0.000490358	0.0110057	608	465	394	446	492	496	630	497	335.319	489.744	404.852	442.289	508.411	511.484	558.218	512.955	Up Regulated
ENSG00000197857	ENSG00000197857.13	ZNF44	12224686	12294883	-1	mRNA	zinc finger protein 44 [Source:HGNC Symbol;Acc:HGNC:13110]	348.048	-0.285808	0.100291	0.000492554	0.0110428	689	315	339	304	256	258	328	255	379.991	331.762	348.337	301.471	264.539	266.054	290.628	263.186	Down Regulated
ENSG00000105968	ENSG00000105968.18	H2AZ2	44826791	44848087	-1	mRNA	H2A.Z variant histone 2 [Source:HGNC Symbol;Acc:HGNC:20664]	2269.31	-0.303127	0.108079	0.000494514	0.0110745	4775	2231	3078	1969	1945	1782	2133	2083	2633.47	2349.72	3162.78	1952.62	2009.88	1837.63	1889.97	2149.87	Down Regulated
ENSG00000104205	ENSG00000104205.14	SGK3	66712734	66862022	1	mRNA	serum/glucocorticoid regulated kinase family member 3 [Source:HGNC Symbol;Acc:HGNC:10812]	2238.81	0.236435	0.0801923	0.000497298	0.0111119	4442	2240	2177	2944	2981	2831	3457	2875	2449.81	2359.2	2236.96	2919.51	3080.44	2919.38	3063.11	2967.29	Up Regulated
ENSG00000184661	ENSG00000184661.14	CDCA2	25459199	25507911	1	mRNA	cell division cycle associated 2 [Source:HGNC Symbol;Acc:HGNC:14623]	788.802	-0.473081	0.182606	0.000497827	0.0111119	1323	836	1284	601	633	534	661	553	729.649	880.486	1319.37	596	654.115	550.671	585.686	570.752	Down Regulated
ENSG00000234145	ENSG00000234145.1	NAP1L4P3	47763460	47764606	1	mRNA	nucleosome assembly protein 1 like 4 pseudogene 3 [Source:HGNC Symbol;Acc:HGNC:39738]	521.643	0.269943	0.0943118	0.000503643	0.0112294	795	482	489	576	572	557	762	640	438.451	507.649	502.469	571.208	591.08	574.389	675.178	660.545	Up Regulated
ENSG00000250312	ENSG00000250312.8	ZNF718	124501	202303	1	mRNA	zinc finger protein 718 [Source:HGNC Symbol;Acc:HGNC:26889]	369.778	-0.275684	0.0966368	0.000505589	0.0112604	744	356	471	345	338	276	352	334	410.324	374.944	483.973	342.13	349.275	284.616	311.893	344.722	Down Regulated
ENSG00000169439	ENSG00000169439.12	SDC2	96493813	96611790	1	mRNA	syndecan 2 [Source:HGNC Symbol;Acc:HGNC:10659]	17636.2	0.339259	0.124113	0.000508346	0.0113094	19457	14983	13696	17062	17993	18718	22505	17697	10730.8	15780.3	14073.2	16920	18593.2	19302.3	19940.8	18265.1	Up Regulated
ENSG00000120694	ENSG00000120694.19	HSPH1	31134973	31162388	-1	mRNA	heat shock protein family H (Hsp110) member 1 [Source:HGNC Symbol;Acc:HGNC:16969]	4180.52	-0.315763	0.113921	0.000509756	0.0113284	9002	4321	4207	3154	3349	3054	3817	3011	4964.7	4550.93	4322.88	3127.76	3460.71	3149.34	3382.09	3107.66	Down Regulated
ENSG00000109511	ENSG00000109511.11	ANXA10	168092537	168187736	1	mRNA	annexin A10 [Source:HGNC Symbol;Acc:HGNC:534]	45.4904	-0.868834	0.346326	0.000511688	0.0113589	45	32	47	16	15	13	11	19	24.818	33.7028	48.2946	15.8669	15.5003	13.4058	9.74666	19.6099	Down Regulated
ENSG00000105486	ENSG00000105486.14	LIG1	48115445	48170603	-1	mRNA	DNA ligase 1 [Source:HGNC Symbol;Acc:HGNC:6598]	787.334	-0.475524	0.184439	0.000514193	0.0114021	1595	751	1003	564	481	482	662	581	879.66	790.963	1030.63	559.308	497.044	497.047	586.572	599.651	Down Regulated
ENSG00000165671	ENSG00000165671.20	NSD1	177131830	177300213	1	mRNA	nuclear receptor binding SET domain protein 1 [Source:HGNC Symbol;Acc:HGNC:14234]	5158.58	0.145757	0.0454923	0.000515757	0.0114243	7659	4141	4091	4913	4768	4825	5465	4809	4224.02	4361.35	4203.68	4872.12	4927.04	4975.63	4842.32	4963.38	Up Regulated
ENSG00000170677	ENSG00000170677.6	SOCS6	70289045	70330199	1	mRNA	suppressor of cytokine signaling 6 [Source:HGNC Symbol;Acc:HGNC:16833]	1396.22	-0.212961	0.0710378	0.000516774	0.0114343	3406	2147	1886	1732	1707	1539	1785	1605	1878.45	2261.25	1937.95	1717.59	1763.94	1587.04	1581.62	1656.52	Down Regulated
ENSG00000106261	ENSG00000106261.17	ZKSCAN1	100015572	100041689	1	mRNA	zinc finger with KRAB and SCAN domains 1 [Source:HGNC Symbol;Acc:HGNC:13101]	3753.96	0.165052	0.0525386	0.000517439	0.0114366	6125	3621	3252	4146	3932	3856	4765	4205	3378.01	3813.68	3341.57	4111.51	4063.16	3976.38	4222.08	4339.99	Up Regulated
ENSG00000102743	ENSG00000102743.15	SLC25A15	40789412	40812460	1	mRNA	solute carrier family 25 member 15 [Source:HGNC Symbol;Acc:HGNC:10985]	548.879	-0.272902	0.0949216	0.000518134	0.0114395	1042	429	454	391	396	346	450	345	574.675	451.828	466.505	387.747	409.209	356.802	398.727	356.075	Down Regulated
ENSG00000121211	ENSG00000121211.7	MND1	153344649	153415118	1	mRNA	meiotic nuclear divisions 1 [Source:HGNC Symbol;Acc:HGNC:24839]	245.103	-0.416875	0.158975	0.000522405	0.0115162	383	271	341	224	199	166	233	160	211.229	285.421	350.392	222.136	205.638	171.182	206.452	165.136	Down Regulated
ENSG00000066455	ENSG00000066455.13	GOLGA5	92794305	92839947	1	mRNA	golgin A5 [Source:HGNC Symbol;Acc:HGNC:4428]	1292.52	0.230572	0.0782456	0.000522742	0.0115162	2366	1296	1281	1512	1552	1574	1912	1612	1304.88	1364.96	1316.28	1499.42	1603.77	1623.14	1694.15	1663.75	Up Regulated
ENSG00000092964	ENSG00000092964.18	DPYSL2	26514031	26658178	1	mRNA	dihydropyrimidinase like 2 [Source:HGNC Symbol;Acc:HGNC:3014]	8481.1	0.395023	0.149585	0.000533532	0.0117404	7999	8853	7746	11277	11430	11530	12341	10784	4411.54	9324.09	7959.35	11183.2	11811.3	11889.9	10934.9	11130.2	Up Regulated
ENSG00000113368	ENSG00000113368.12	LMNB1	126776623	126837020	1	mRNA	lamin B1 [Source:HGNC Symbol;Acc:HGNC:6637]	2212.16	-0.283924	0.100833	0.000534074	0.0117404	3651	1971	2299	1563	1545	1486	1825	1556	2013.57	2075.88	2362.32	1550	1596.54	1532.39	1617.06	1605.95	Down Regulated
ENSG00000155158	ENSG00000155158.20	TTC39B	15163622	15307360	-1	mRNA	tetratricopeptide repeat domain 39B [Source:HGNC Symbol;Acc:HGNC:23704]	2488.17	0.365868	0.136674	0.000534974	0.0117474	3538	2130	1858	2911	2942	2963	3471	2925	1951.25	2243.34	1909.18	2886.78	3040.13	3055.5	3075.51	3018.9	Up Regulated
ENSG00000196247	ENSG00000196247.11	ZNF107	64666099	64711577	1	mRNA	zinc finger protein 107 [Source:HGNC Symbol;Acc:HGNC:12887]	917.295	-0.308265	0.11142	0.000537185	0.0117706	1564	773	886	766	775	576	654	608	862.564	814.134	910.404	759.627	800.851	593.982	579.483	627.518	Down Regulated
ENSG00000134317	ENSG00000134317.18	GRHL1	9951693	10002277	1	mRNA	grainyhead like transcription factor 1 [Source:HGNC Symbol;Acc:HGNC:17923]	21.6863	0.692728	0.281558	0.000537975	0.0117752	22	15	19	20	28	31	27	33	12.1332	15.7982	19.5233	19.8336	28.934	31.9678	23.9236	34.0594	Up Regulated
ENSG00000164066	ENSG00000164066.13	INTU	127623271	127726737	1	mRNA	inturned planar cell polarity protein [Source:HGNC Symbol;Acc:HGNC:29239]	333.879	-0.247177	0.0848621	0.000539254	0.0117905	790	300	338	344	288	304	331	284	435.694	315.964	347.31	341.138	297.607	313.49	293.286	293.117	Down Regulated
ENSG00000115306	ENSG00000115306.16	SPTBN1	54456317	54671446	1	mRNA	spectrin beta, non-erythrocytic 1 [Source:HGNC Symbol;Acc:HGNC:11275]	3567.02	0.322431	0.117757	0.000540982	0.0118155	4266	3550	3148	4564	4378	4437	4969	4411	2352.75	3738.91	3234.71	4526.03	4524.03	4575.52	4402.83	4552.6	Up Regulated
ENSG00000100077	ENSG00000100077.15	GRK3	25564675	25729294	1	mRNA	G protein-coupled receptor kinase 3 [Source:HGNC Symbol;Acc:HGNC:290]	871.553	-0.323291	0.117937	0.000542046	0.0118193	3041	942	1154	850	854	860	1114	829	1677.15	992.127	1185.79	842.928	882.486	886.848	987.071	855.612	Down Regulated
ENSG00000178951	ENSG00000178951.9	ZBTB7A	4043303	4066899	-1	mRNA	zinc finger and BTB domain containing 7A [Source:HGNC Symbol;Acc:HGNC:18078]	1061.64	0.322224	0.117869	0.000548113	0.0119306	1298	809	613	971	995	1016	1180	966	715.862	852.049	629.884	962.921	1028.19	1047.72	1045.55	997.01	Up Regulated
ENSG00000143621	ENSG00000143621.17	ILF2	153661788	153671028	-1	mRNA	interleukin enhancer binding factor 2 [Source:HGNC Symbol;Acc:HGNC:6037]	2955.81	-0.212883	0.0714091	0.000548603	0.0119306	6970	3097	3065	2867	2585	2718	3202	2692	3844.03	3261.8	3149.42	2843.15	2671.23	2802.85	2837.16	2778.42	Down Regulated
ENSG00000099822	ENSG00000099822.3	HCN2	589881	617159	1	mRNA	hyperpolarization activated cyclic nucleotide gated potassium and sodium channel 2 [Source:HGNC Symbol;Acc:HGNC:4846]	117.217	0.641932	0.262311	0.000554179	0.012039	67	51	45	77	78	85	122	87	36.9513	53.7139	46.2395	76.3594	80.6018	87.6536	108.099	89.7928	Up Regulated
ENSG00000239521	ENSG00000239521.8	CASTOR3	100200653	100272218	-1	mRNA	CASTOR family member 3 [Source:HGNC Symbol;Acc:HGNC:29954]	90.6835	0.441933	0.174755	0.000555463	0.012054	78	69	63	78	99	86	99	85	43.0179	72.6717	64.7353	77.351	102.302	88.6848	87.72	87.7286	Up Regulated
ENSG00000163923	ENSG00000163923.10	RPL39L	187120948	187180908	-1	mRNA	ribosomal protein L39 like [Source:HGNC Symbol;Acc:HGNC:17094]	186.371	-0.351619	0.13057	0.000556662	0.0120671	476	206	240	156	170	137	203	160	262.519	216.962	246.61	154.702	175.671	141.277	179.87	165.136	Down Regulated
ENSG00000038427	ENSG00000038427.16	VCAN	83471618	83582303	1	mRNA	versican [Source:HGNC Symbol;Acc:HGNC:2464]	3970.13	-0.717474	0.29618	0.000558366	0.0120846	33661	7776	9747	6372	5586	5337	6520	5902	18564.4	8189.78	10015.5	6318.99	5772.33	5503.61	5777.11	6091.46	Down Regulated
ENSG00000223723	ENSG00000223723.1	TFDP1P2	36962196	36963425	-1	mRNA	TFDP1 pseudogene 2 [Source:HGNC Symbol;Acc:HGNC:54930]	316.821	-0.313556	0.114321	0.000559692	0.0120846	628	368	440	276	266	267	345	260	346.349	387.582	452.119	273.704	274.873	275.335	305.691	268.346	Down Regulated
ENSG00000135473	ENSG00000135473.15	PAN2	56316223	56334053	-1	mRNA	poly(A) specific ribonuclease subunit PAN2 [Source:HGNC Symbol;Acc:HGNC:20074]	1112.99	0.244229	0.0845669	0.00055977	0.0120846	1831	1082	1106	1507	1413	1412	1667	1365	1009.82	1139.58	1136.46	1494.46	1460.13	1456.08	1477.06	1408.82	Up Regulated
ENSG00000244227	ENSG00000244227.7	LRRC77P	167864773	167924011	1	mRNA	leucine rich repeat containing 77, pseudogene [Source:HGNC Symbol;Acc:HGNC:50536]	77.5815	0.867803	0.364255	0.000560438	0.0120846	51	119	118	395	416	336	356	310	28.1271	125.332	121.25	391.714	429.876	346.489	315.437	319.952	Up Regulated
ENSG00000083857	ENSG00000083857.14	FAT1	186587794	186726722	-1	mRNA	FAT atypical cadherin 1 [Source:HGNC Symbol;Acc:HGNC:3595]	20401.1	0.183366	0.0599187	0.000560504	0.0120846	26390	18441	16468	18358	19205	19908	22413	18807	14554.4	19422.3	16921.6	18205.3	19845.6	20529.5	19859.3	19410.7	Up Regulated
ENSG00000101236	ENSG00000101236.17	RNF24	3927309	4015558	-1	mRNA	ring finger protein 24 [Source:HGNC Symbol;Acc:HGNC:13779]	1001.47	0.274261	0.0975238	0.00056269	0.0120846	787	594	566	720	696	737	822	695	434.039	625.608	581.59	714.01	719.216	760.008	728.341	717.311	Up Regulated
ENSG00000163694	ENSG00000163694.15	RBM47	40423267	40630875	-1	mRNA	RNA binding motif protein 47 [Source:HGNC Symbol;Acc:HGNC:30358]	3080.09	0.201919	0.0672218	0.000562746	0.0120846	6557	3193	3217	3895	3851	4067	4766	4054	3616.26	3362.91	3305.61	3862.59	3979.46	4193.96	4222.96	4184.14	Up Regulated
ENSG00000001084	ENSG00000001084.12	GCLC	53497341	53616970	-1	mRNA	glutamate-cysteine ligase catalytic subunit [Source:HGNC Symbol;Acc:HGNC:4311]	3728.43	0.356258	0.133309	0.00056282	0.0120846	8717	3592	3537	5537	5542	5555	6961	6025	4807.52	3783.14	3634.42	5490.93	5726.86	5728.42	6167.86	6218.41	Up Regulated
ENSG00000111799	ENSG00000111799.21	COL12A1	75084326	75206267	-1	mRNA	collagen type XII alpha 1 chain [Source:HGNC Symbol;Acc:HGNC:2188]	270.294	-0.946198	0.399519	0.000564621	0.0121053	2733	163	263	294	217	202	270	302	1507.28	171.674	270.244	291.554	224.238	208.306	239.236	311.695	Down Regulated
ENSG00000111581	ENSG00000111581.10	NUP107	68686951	68745809	1	mRNA	nucleoporin 107 [Source:HGNC Symbol;Acc:HGNC:29914]	977.592	-0.273568	0.0969973	0.000564978	0.0121053	2350	1015	1173	926	910	832	1018	874	1296.05	1069.01	1205.31	918.296	940.354	857.974	902.009	902.057	Down Regulated
ENSG00000013573	ENSG00000013573.17	DDX11	31073860	31104799	1	mRNA	DEAD/H-box helicase 11 [Source:HGNC Symbol;Acc:HGNC:2736]	962.188	-0.429732	0.166699	0.00057137	0.0121801	1913	1009	1268	850	690	760	816	722	1055.04	1062.69	1302.93	842.928	713.016	783.726	723.025	745.177	Down Regulated
ENSG00000080986	ENSG00000080986.13	NDC80	2571557	2616635	1	mRNA	NDC80 kinetochore complex component [Source:HGNC Symbol;Acc:HGNC:16909]	576.633	-0.462236	0.181507	0.000571801	0.0121801	1048	657	908	514	442	417	503	482	577.984	691.961	933.01	509.724	456.744	430.018	445.688	497.473	Down Regulated
ENSG00000225031	ENSG00000225031.1	EIF4BP7	111619677	111621489	-1	mRNA	eukaryotic translation initiation factor 4B pseudogene 7 [Source:HGNC Symbol;Acc:HGNC:37940]	1471.72	0.214377	0.0723991	0.000572064	0.0121801	3312	2100	1856	2380	2359	2406	2778	2370	1826.61	2211.75	1907.12	2360.2	2437.69	2481.11	2461.47	2446.08	Up Regulated
ENSG00000104888	ENSG00000104888.10	SLC17A7	49429401	49442360	-1	mRNA	solute carrier family 17 member 7 [Source:HGNC Symbol;Acc:HGNC:16704]	45.3251	0.637073	0.263094	0.000577827	0.012277	22	20	27	44	47	36	41	50	12.1332	21.0643	27.7437	43.6339	48.5678	37.1239	36.3285	51.6051	Up Regulated
ENSG00000173262	ENSG00000173262.11	SLC2A14	7812512	7891148	-1	mRNA	solute carrier family 2 member 14 [Source:HGNC Symbol;Acc:HGNC:18301]	61.4206	-0.564069	0.226706	0.000579524	0.0122849	126	60	77	54	43	31	42	49	69.4904	63.1928	79.1209	53.5507	44.4343	31.9678	37.2145	50.573	Down Regulated
ENSG00000165046	ENSG00000165046.12	LETM2	38386207	38409527	1	mRNA	leucine zipper and EF-hand containing transmembrane protein 2 [Source:HGNC Symbol;Acc:HGNC:14648]	274.68	-0.305589	0.110001	0.000579645	0.0122849	558	306	347	240	215	214	290	246	307.743	322.283	356.558	238.003	222.172	220.681	256.957	253.897	Down Regulated
ENSG00000270882	ENSG00000270882.2	H4C14	149832657	149839767	1	mRNA	H4 clustered histone 14 [Source:HGNC Symbol;Acc:HGNC:4794]	17.87	-1.14772	0.47597	0.000580524	0.0122849	40	22	25	7	12	7	8	2	22.0604	23.1707	25.6886	6.94176	12.4003	7.21853	7.08848	2.0642	Down Regulated
ENSG00000184743	ENSG00000184743.12	ATL3	63624087	63671921	-1	mRNA	atlastin GTPase 3 [Source:HGNC Symbol;Acc:HGNC:24526]	4987.87	-0.218239	0.074068	0.000580617	0.0122849	9670	5577	5984	4681	4585	4383	5142	4546	5333.11	5873.77	6148.82	4642.05	4737.94	4519.83	4556.12	4691.93	Down Regulated
ENSG00000132436	ENSG00000132436.11	FIGNL1	50444128	50542535	-1	mRNA	fidgetin like 1 [Source:HGNC Symbol;Acc:HGNC:13286]	615.9	-0.313917	0.115066	0.000583514	0.0123333	1623	753	962	608	637	579	658	676	895.103	793.069	988.497	602.941	658.248	597.075	583.028	697.701	Down Regulated
ENSG00000226479	ENSG00000226479.4	TMEM185B	120217479	120223400	-1	mRNA	transmembrane protein 185B [Source:HGNC Symbol;Acc:HGNC:18896]	1661.68	0.188223	0.0620878	0.000587132	0.0123969	2760	1392	1327	1704	1781	1624	1960	1693	1522.17	1466.07	1363.55	1689.82	1840.41	1674.7	1736.68	1747.35	Up Regulated
ENSG00000126970	ENSG00000126970.16	ZC4H2	64915802	65034713	-1	mRNA	zinc finger C4H2-type containing [Source:HGNC Symbol;Acc:HGNC:24931]	113.971	-0.401041	0.151215	0.000588131	0.0124008	180	99	129	79	70	52	94	83	99.272	104.268	132.553	78.3427	72.335	53.6234	83.2897	85.6644	Down Regulated
ENSG00000114346	ENSG00000114346.13	ECT2	172750682	172821474	1	mRNA	epithelial cell transforming 2 [Source:HGNC Symbol;Acc:HGNC:3155]	672.958	-0.316472	0.116365	0.000588536	0.0124008	1278	644	896	550	571	498	610	533	704.831	678.269	920.679	545.424	590.047	513.547	540.497	550.11	Down Regulated
ENSG00000134278	ENSG00000134278.15	SPIRE1	12446512	12658107	-1	mRNA	spire type actin nucleation factor 1 [Source:HGNC Symbol;Acc:HGNC:30622]	840.4	0.206095	0.0693238	0.000592797	0.0124776	1134	619	647	753	748	805	915	717	625.414	651.939	664.821	746.735	772.951	830.131	810.745	740.017	Up Regulated
ENSG00000065923	ENSG00000065923.10	SLC9A7	46599251	46759118	-1	mRNA	solute carrier family 9 member A7 [Source:HGNC Symbol;Acc:HGNC:17123]	4466.14	0.198702	0.066402	0.000598177	0.0125684	4588	3120	2538	3068	3358	3212	3705	3217	2530.33	3286.02	2607.91	3042.47	3470.01	3312.27	3282.85	3320.27	Up Regulated
ENSG00000116741	ENSG00000116741.8	RGS2	192809039	192812275	1	mRNA	regulator of G protein signaling 2 [Source:HGNC Symbol;Acc:HGNC:9998]	3594.37	0.340665	0.127427	0.000598347	0.0125684	7701	3703	3629	5835	5693	6079	6418	5435	4247.19	3900.05	3728.96	5786.45	5882.9	6268.78	5686.73	5609.47	Up Regulated
ENSG00000182963	ENSG00000182963.10	GJC1	44798448	44830816	-1	mRNA	gap junction protein gamma 1 [Source:HGNC Symbol;Acc:HGNC:4280]	116.885	-0.461954	0.182748	0.000606584	0.0127282	231	128	173	96	74	95	98	96	127.399	134.811	177.765	95.2013	76.4684	97.9657	86.8339	99.0818	Down Regulated
ENSG00000170145	ENSG00000170145.5	SIK2	111602449	111730855	1	mRNA	salt inducible kinase 2 [Source:HGNC Symbol;Acc:HGNC:21680]	1750.11	-0.158846	0.05101	0.00060893	0.0127643	3182	1647	1714	1464	1456	1471	1635	1430	1754.91	1734.64	1761.21	1451.82	1504.57	1516.92	1448.71	1475.91	Down Regulated
ENSG00000162894	ENSG00000162894.12	FCMR	206903317	206923247	-1	mRNA	Fc fragment of IgM receptor [Source:HGNC Symbol;Acc:HGNC:14315]	818.348	0.575316	0.235506	0.000609656	0.0127663	312	812	613	1135	1183	1116	1200	1087	172.071	855.209	629.884	1125.56	1222.46	1150.84	1063.27	1121.89	Up Regulated
ENSG00000137814	ENSG00000137814.11	HAUS2	42548828	42569994	1	mRNA	HAUS augmin like complex subunit 2 [Source:HGNC Symbol;Acc:HGNC:25530]	897.58	-0.249408	0.087525	0.000610768	0.0127764	2293	1085	1189	1020	974	831	1092	940	1264.62	1142.74	1221.75	1011.51	1006.49	856.942	967.578	970.176	Down Regulated
ENSG00000182010	ENSG00000182010.11	RTKN2	62183035	62268844	-1	mRNA	rhotekin 2 [Source:HGNC Symbol;Acc:HGNC:19364]	151.315	-0.573129	0.234386	0.000613835	0.012817	165	103	156	70	71	55	67	69	90.9993	108.481	160.297	69.4176	73.3683	56.717	59.366	71.215	Down Regulated
ENSG00000011021	ENSG00000011021.23	CLCN6	11806096	11848079	1	mRNA	chloride voltage-gated channel 6 [Source:HGNC Symbol;Acc:HGNC:2024]	985.023	0.286997	0.103968	0.00061416	0.012817	1454	721	799	993	1056	1051	1114	1062	801.897	759.366	821.007	984.738	1091.22	1083.81	987.071	1096.09	Up Regulated
ENSG00000065154	ENSG00000065154.11	OAT	124397303	124418976	-1	mRNA	ornithine aminotransferase [Source:HGNC Symbol;Acc:HGNC:8091]	828.927	0.231452	0.0800549	0.000614598	0.012817	1273	716	618	877	864	832	1016	879	702.074	754.1	635.022	869.703	892.82	857.974	900.237	907.217	Up Regulated
ENSG00000136940	ENSG00000136940.13	PDCL	122798389	122828588	-1	mRNA	phosducin like [Source:HGNC Symbol;Acc:HGNC:8770]	644.607	0.291304	0.10608	0.0006173	0.0128601	1023	852	691	1020	1002	983	1098	972	564.196	897.337	710.033	1011.51	1035.42	1013.69	972.894	1003.2	Up Regulated
ENSG00000128951	ENSG00000128951.14	DUT	48331011	48343373	1	mRNA	deoxyuridine triphosphatase [Source:HGNC Symbol;Acc:HGNC:3078]	754.496	-0.308801	0.113603	0.000619323	0.012889	2098	843	1040	745	668	696	918	747	1157.07	887.858	1068.65	738.802	690.282	717.728	813.403	770.98	Down Regulated
ENSG00000088325	ENSG00000088325.16	TPX2	31739271	31801805	1	mRNA	TPX2 microtubule nucleation factor [Source:HGNC Symbol;Acc:HGNC:1249]	1498.11	-0.430146	0.169	0.000620155	0.0128931	2162	1700	2078	1160	1102	989	1191	1099	1192.37	1790.46	2135.24	1150.35	1138.76	1019.87	1055.3	1134.28	Down Regulated
ENSG00000147570	ENSG00000147570.9	DNAJC5B	66021553	66101245	1	mRNA	DnaJ heat shock protein family (Hsp40) member C5 beta [Source:HGNC Symbol;Acc:HGNC:24138]	274.378	0.478506	0.191825	0.000622672	0.0129322	294	286	257	491	433	427	528	448	162.144	301.219	264.079	486.915	447.443	440.33	467.84	462.382	Up Regulated
ENSG00000077713	ENSG00000077713.19	SLC25A43	119399336	119454478	1	mRNA	solute carrier family 25 member 43 [Source:HGNC Symbol;Acc:HGNC:30557]	522.407	0.208357	0.0706439	0.000626772	0.0130041	983	493	534	640	636	609	740	681	542.136	519.234	548.708	634.675	657.215	628.012	655.684	702.861	Up Regulated
ENSG00000206527	ENSG00000206527.10	HACD2	123490820	123585053	-1	mRNA	3-hydroxyacyl-CoA dehydratase 2 [Source:HGNC Symbol;Acc:HGNC:9640]	1371.76	-0.292367	0.106656	0.000632412	0.0131077	4223	1616	1948	1484	1421	1418	1584	1531	2329.03	1701.99	2001.66	1471.65	1468.4	1462.27	1403.52	1580.15	Down Regulated
ENSG00000163521	ENSG00000163521.16	GLB1L	219236598	219245478	-1	mRNA	galactosidase beta 1 like [Source:HGNC Symbol;Acc:HGNC:28129]	64.506	0.431585	0.172824	0.000633139	0.0131094	88	46	44	42	69	66	79	57	48.533	48.4478	45.2119	41.6506	71.3016	68.0604	69.9987	58.8298	Up Regulated
ENSG00000198168	ENSG00000198168.9	SVIP	22813799	22830299	-1	mRNA	small VCP interacting protein [Source:HGNC Symbol;Acc:HGNC:25238]	268.018	-0.334155	0.125306	0.000635642	0.0131478	724	335	380	307	248	280	352	233	399.294	352.826	390.467	304.446	256.272	288.741	311.893	240.48	Down Regulated
ENSG00000164327	ENSG00000164327.13	RICTOR	38937920	39074399	-1	mRNA	RPTOR independent companion of MTOR complex 2 [Source:HGNC Symbol;Acc:HGNC:28611]	4427.67	0.253135	0.0896762	0.000638526	0.013194	4590	3086	2922	3931	3950	3677	4463	3604	2531.44	3250.22	3002.48	3898.29	4081.76	3791.79	3954.49	3719.69	Up Regulated
ENSG00000163749	ENSG00000163749.17	CCDC158	76312997	76421868	-1	mRNA	coiled-coil domain containing 158 [Source:HGNC Symbol;Acc:HGNC:26374]	32.0357	0.642152	0.269025	0.000641037	0.0132325	25	25	20	31	49	41	31	33	13.7878	26.3303	20.5509	30.7421	50.6345	42.2799	27.4679	34.0594	Up Regulated
ENSG00000196636	ENSG00000196636.7	SDHAF3	97117698	97181763	1	mRNA	succinate dehydrogenase complex assembly factor 3 [Source:HGNC Symbol;Acc:HGNC:21752]	84.425	-0.460492	0.182769	0.000642648	0.0132522	255	120	93	80	72	80	77	75	140.635	126.386	95.5616	79.3344	74.4017	82.4975	68.2266	77.4076	Down Regulated
ENSG00000106003	ENSG00000106003.13	LFNG	2512529	2529177	1	mRNA	LFNG O-fucosylpeptide 3-beta-N-acetylglucosaminyltransferase [Source:HGNC Symbol;Acc:HGNC:6560]	216.155	0.484536	0.195227	0.000643963	0.0132525	368	233	164	335	316	356	417	360	202.956	245.399	168.517	332.213	326.541	367.114	369.487	371.557	Up Regulated
ENSG00000059804	ENSG00000059804.16	SLC2A3	7919230	7936187	-1	mRNA	solute carrier family 2 member 3 [Source:HGNC Symbol;Acc:HGNC:11007]	437.565	0.427544	0.169288	0.000651466	0.0133933	532	724	661	820	891	946	999	842	293.404	762.526	679.206	813.178	920.721	975.532	885.174	869.03	Up Regulated
ENSG00000124588	ENSG00000124588.20	NQO2	2987987	3019755	1	mRNA	N-ribosyldihydronicotinamide:quinone reductase 2 [Source:HGNC Symbol;Acc:HGNC:7856]	1605.27	0.206721	0.0702537	0.000652874	0.0134004	3992	1904	1735	2655	2504	2442	2845	2452	2201.63	2005.32	1782.79	2632.91	2587.52	2518.24	2520.84	2530.71	Up Regulated
ENSG00000112290	ENSG00000112290.13	WASF1	110099819	110180004	-1	mRNA	WASP family member 1 [Source:HGNC Symbol;Acc:HGNC:12732]	586.649	-0.263027	0.0942415	0.000653132	0.0134004	924	580	626	418	415	455	484	415	509.596	610.863	643.242	414.522	428.843	469.204	428.853	428.322	Down Regulated
ENSG00000079739	ENSG00000079739.17	PGM1	63593411	63660245	1	mRNA	phosphoglucomutase 1 [Source:HGNC Symbol;Acc:HGNC:8905]	100.038	-0.346938	0.131232	0.000657423	0.0134748	287	125	111	118	103	114	94	88	158.284	131.652	114.057	117.018	106.436	117.559	83.2897	90.8249	Down Regulated
ENSG00000164796	ENSG00000164796.18	CSMD3	112222928	113436939	-1	mRNA	CUB and Sushi multiple domains 3 [Source:HGNC Symbol;Acc:HGNC:19291]	97.9758	-0.597831	0.248104	0.000663314	0.0135819	443	153	138	114	101	104	97	96	244.319	161.142	141.801	113.052	104.369	107.247	85.9478	99.0818	Down Regulated
ENSG00000113580	ENSG00000113580.15	NR3C1	143277931	143435512	-1	mRNA	nuclear receptor subfamily 3 group C member 1 [Source:HGNC Symbol;Acc:HGNC:7978]	7885.51	0.260548	0.093337	0.000665583	0.0136146	10969	7283	7320	8906	9247	9271	10222	8697	6049.53	7670.55	7521.62	8831.9	9555.45	9560.42	9057.31	8976.19	Up Regulated
ENSG00000198890	ENSG00000198890.8	PRMT6	107056674	107067636	1	mRNA	protein arginine methyltransferase 6 [Source:HGNC Symbol;Acc:HGNC:18241]	787.569	-0.202957	0.0688833	0.000667655	0.0136433	1857	1025	1041	914	805	827	1035	846	1024.16	1079.54	1069.67	906.396	831.852	852.818	917.072	873.158	Down Regulated
ENSG00000005302	ENSG00000005302.18	MSL3	11758159	11775772	1	mRNA	MSL complex subunit 3 [Source:HGNC Symbol;Acc:HGNC:7370]	1193.62	0.189826	0.0636098	0.000668403	0.0136448	2135	1205	1253	1355	1376	1490	1676	1392	1177.48	1269.12	1287.51	1343.73	1421.9	1536.52	1485.04	1436.69	Up Regulated
ENSG00000146950	ENSG00000146950.13	SHROOM2	9786429	9949443	1	mRNA	shroom family member 2 [Source:HGNC Symbol;Acc:HGNC:630]	108.979	0.728225	0.321955	0.000669589	0.0136507	40	94	74	177	206	177	174	153	22.0604	99.002	76.0382	175.527	212.871	182.526	154.174	157.912	Up Regulated
ENSG00000156110	ENSG00000156110.13	ADK	74151202	74709963	1	mRNA	adenosine kinase [Source:HGNC Symbol;Acc:HGNC:257]	1079.88	0.328344	0.123873	0.000670036	0.0136507	1540	973	948	1405	1391	1272	1590	1365	849.327	1024.78	974.111	1393.31	1437.4	1311.71	1408.84	1408.82	Up Regulated
ENSG00000172794	ENSG00000172794.20	RAB37	74670578	74747335	1	mRNA	RAB37, member RAS oncogene family [Source:HGNC Symbol;Acc:HGNC:30268]	15.3795	0.935917	0.399906	0.000671167	0.0136601	13	8	6	13	16	17	18	27	7.16965	8.4257	6.16526	12.8918	16.5337	17.5307	15.9491	27.8667	Up Regulated
ENSG00000075275	ENSG00000075275.16	CELSR1	46360834	46537620	-1	mRNA	cadherin EGF LAG seven-pass G-type receptor 1 [Source:HGNC Symbol;Acc:HGNC:1850]	1376.33	0.421236	0.166872	0.000672217	0.0136652	1480	786	595	1042	1123	1155	1321	1148	816.237	827.825	611.388	1033.33	1160.46	1191.06	1170.49	1184.85	Up Regulated
ENSG00000107164	ENSG00000107164.16	FUBP3	130578965	130638352	1	mRNA	far upstream element binding protein 3 [Source:HGNC Symbol;Acc:HGNC:4005]	1545.23	0.143291	0.04572	0.000672763	0.0136652	2822	1461	1348	1678	1640	1737	1891	1641	1556.36	1538.74	1385.13	1664.04	1694.7	1791.23	1675.54	1693.68	Up Regulated
ENSG00000229794	ENSG00000229794.2	MTCYBP32	102806741	102807824	1	mRNA	MT-CYB pseudogene 32 [Source:HGNC Symbol;Acc:HGNC:52174]	12.6556	-1.36589	0.550139	0.000676547	0.0137254	21	8	6	12	2	4	2	4	11.5817	8.4257	6.16526	11.9002	2.06671	4.12487	1.77212	4.12841	Down Regulated
ENSG00000145354	ENSG00000145354.12	CISD2	102868974	102892807	1	mRNA	CDGSH iron sulfur domain 2 [Source:HGNC Symbol;Acc:HGNC:24212]	522.747	-0.252558	0.0899972	0.000680703	0.0137851	1326	617	682	591	527	505	621	547	731.304	649.832	700.785	586.083	544.579	520.765	550.243	564.56	Down Regulated
ENSG00000145868	ENSG00000145868.16	FBXO38	148383935	148442836	1	mRNA	F-box protein 38 [Source:HGNC Symbol;Acc:HGNC:28844]	2904.57	0.226407	0.0788955	0.00068371	0.0138322	5364	3357	3297	4387	4225	4189	4746	4022	2958.31	3535.64	3387.81	4350.5	4365.93	4319.77	4205.24	4151.11	Up Regulated
ENSG00000163235	ENSG00000163235.16	TGFA	70447284	70554193	-1	mRNA	transforming growth factor alpha [Source:HGNC Symbol;Acc:HGNC:11765]	39.6208	-0.659177	0.274659	0.000691558	0.013977	100	28	34	37	18	36	16	21	55.1511	29.49	34.9365	36.6922	18.6004	37.1239	14.177	21.6741	Down Regulated
ENSG00000159713	ENSG00000159713.11	TPPP3	67389809	67393518	-1	mRNA	tubulin polymerization promoting protein family member 3 [Source:HGNC Symbol;Acc:HGNC:24162]	49.8194	-0.933343	0.404008	0.000694745	0.0140275	270	65	146	36	25	61	48	46	148.908	68.4588	150.021	35.7005	25.8339	62.9043	42.5309	47.4767	Down Regulated
ENSG00000165309	ENSG00000165309.14	ARMC3	22928024	23038523	1	mRNA	armadillo repeat containing 3 [Source:HGNC Symbol;Acc:HGNC:30964]	73.3928	-0.785139	0.333075	0.00069607	0.0140403	104	37	45	14	10	18	23	30	57.3572	38.9689	46.2395	13.8835	10.3336	18.5619	20.3794	30.963	Down Regulated
ENSG00000089685	ENSG00000089685.15	BIRC5	78214186	78225636	1	mRNA	baculoviral IAP repeat containing 5 [Source:HGNC Symbol;Acc:HGNC:593]	1077.72	-0.442718	0.17807	0.00069868	0.014079	1771	1228	1571	897	820	776	875	818	976.726	1293.35	1614.27	889.537	847.352	800.225	775.303	844.259	Down Regulated
ENSG00000166750	ENSG00000166750.10	SLFN5	35243071	35273655	1	mRNA	schlafen family member 5 [Source:HGNC Symbol;Acc:HGNC:28286]	2783.29	0.273358	0.0996604	0.000701415	0.0141201	3614	2946	2509	3359	3484	3245	3980	3170	1993.16	3102.77	2578.11	3331.05	3600.21	3346.3	3526.52	3271.76	Up Regulated
ENSG00000181577	ENSG00000181577.16	C6orf223	44000580	44007612	1	mRNA	chromosome 6 open reading frame 223 [Source:HGNC Symbol;Acc:HGNC:28692]	317.739	0.599776	0.253505	0.000704321	0.0141505	150	158	172	309	261	353	339	284	82.7267	166.408	176.738	306.429	269.706	364.02	300.374	293.117	Up Regulated
ENSG00000174718	ENSG00000174718.12	RESF1	31959370	31993107	1	mRNA	retroelement silencing factor 1 [Source:HGNC Symbol;Acc:HGNC:25559]	10622.4	0.255632	0.0919549	0.000712701	0.0143039	14277	9332	8718	11669	12320	10928	13117	11067	7873.93	9828.58	8958.13	11571.9	12731	11269.2	11622.5	11422.3	Up Regulated
ENSG00000149136	ENSG00000149136.9	SSRP1	57325986	57335892	-1	mRNA	structure specific recognition protein 1 [Source:HGNC Symbol;Acc:HGNC:11327]	2666.07	-0.218987	0.0760861	0.000713363	0.0143039	5633	2630	2901	2176	2121	2290	2506	2412	3106.66	2769.95	2980.9	2157.9	2191.75	2361.49	2220.47	2489.43	Down Regulated
ENSG00000134198	ENSG00000134198.10	TSPAN2	115048011	115089503	-1	mRNA	tetraspanin 2 [Source:HGNC Symbol;Acc:HGNC:20659]	213.859	-0.477494	0.194674	0.000716615	0.01432	865	245	376	201	200	210	260	220	477.057	258.037	386.356	199.328	206.671	216.556	230.376	227.062	Down Regulated
ENSG00000120802	ENSG00000120802.13	TMPO	98515579	98550351	1	mRNA	thymopoietin [Source:HGNC Symbol;Acc:HGNC:11875]	4477.16	-0.313487	0.118129	0.000716623	0.01432	9973	6508	7529	4931	5000	4489	5193	4705	5500.22	6854.31	7736.38	4889.97	5166.78	4629.14	4601.31	4856.04	Down Regulated
ENSG00000133112	ENSG00000133112.16	TPT1	45333471	45341284	-1	mRNA	tumor protein, translationally-controlled 1 [Source:HGNC Symbol;Acc:HGNC:12022]	13852.3	0.25411	0.0913455	0.000716985	0.01432	24283	14792	14191	17388	17984	17755	22623	17228	13392.3	15579.1	14581.9	17243.3	18583.9	18309.3	20045.3	17781	Up Regulated
ENSG00000249779	ENSG00000249779.1		43206709	43207811	1	mRNA	spermine synthase (SMS) pseudogene	76.0312	-0.792469	0.330527	0.000716987	0.01432	315	72	154	45	55	63	67	49	173.726	75.8313	158.242	44.6256	56.8346	64.9668	59.366	50.573	Down Regulated
ENSG00000197977	ENSG00000197977.4	ELOVL2	10980759	11044305	-1	mRNA	ELOVL fatty acid elongase 2 [Source:HGNC Symbol;Acc:HGNC:14416]	33.1947	-0.594475	0.249297	0.00072141	0.0143942	75	47	50	20	18	25	24	30	41.3633	49.501	51.3772	19.8336	18.6004	25.7805	21.2654	30.963	Down Regulated
ENSG00000204070	ENSG00000204070.10	SYS1	45361937	45376798	1	mRNA	SYS1 golgi trafficking protein [Source:HGNC Symbol;Acc:HGNC:16162]	670.671	-0.220669	0.0769987	0.00073205	0.0145778	1510	724	802	637	661	621	670	630	832.782	762.526	824.09	631.7	683.049	640.387	593.66	650.224	Down Regulated
ENSG00000158683	ENSG00000158683.8	PKD1L1	47740202	47948466	-1	mRNA	polycystin 1 like 1, transient receptor potential channel interacting [Source:HGNC Symbol;Acc:HGNC:18053]	88.0894	0.541994	0.228384	0.000737139	0.0146648	84	94	70	159	155	142	152	146	46.3269	99.002	71.9281	157.677	160.17	146.433	134.681	150.687	Up Regulated
ENSG00000040275	ENSG00000040275.17	SPDL1	169583636	169604778	1	mRNA	spindle apparatus coiled-coil protein 1 [Source:HGNC Symbol;Acc:HGNC:26010]	618.216	-0.354975	0.13797	0.000740661	0.0147205	1375	668	868	563	545	504	621	511	758.328	703.546	891.908	558.316	563.179	519.734	550.243	527.404	Down Regulated
ENSG00000181045	ENSG00000181045.15	SLC26A11	80219699	80253500	1	mRNA	solute carrier family 26 member 11 [Source:HGNC Symbol;Acc:HGNC:14471]	604.802	0.495187	0.204907	0.00074466	0.014771	930	391	367	853	772	770	912	868	512.905	411.806	377.109	845.903	797.751	794.038	808.087	895.864	Up Regulated
ENSG00000177182	ENSG00000177182.11	CLVS1	61057158	61501645	1	mRNA	clavesin 1 [Source:HGNC Symbol;Acc:HGNC:23139]	47.7269	-0.707526	0.298477	0.000752637	0.0149147	48	28	25	21	12	12	24	8	26.4725	29.49	25.6886	20.8253	12.4003	12.3746	21.2654	8.25681	Down Regulated
ENSG00000119772	ENSG00000119772.16	DNMT3A	25227855	25342590	-1	mRNA	DNA methyltransferase 3 alpha [Source:HGNC Symbol;Acc:HGNC:2978]	2052.72	0.338618	0.130907	0.000759579	0.0150376	2122	1844	1668	2460	2377	2477	2598	2256	1170.31	1942.12	1713.94	2439.53	2456.29	2554.33	2301.98	2328.42	Up Regulated
ENSG00000123908	ENSG00000123908.12	AGO2	140520156	140635633	-1	mRNA	argonaute RISC catalytic component 2 [Source:HGNC Symbol;Acc:HGNC:3263]	6815.25	0.286307	0.106603	0.000761524	0.0150614	5278	3413	3068	3952	4134	4203	4836	4162	2910.88	3594.62	3152.5	3919.12	4271.9	4334.21	4284.99	4295.61	Up Regulated
ENSG00000213371	ENSG00000213371.4	NAP1L1P3	120805866	120806745	1	mRNA	nucleosome assembly protein 1 like 1 pseudogene 3 [Source:HGNC Symbol;Acc:HGNC:38007]	659.934	0.257217	0.0935529	0.000765671	0.0151183	919	522	487	649	709	654	710	653	506.839	549.777	500.414	643.6	732.65	674.417	629.103	673.962	Up Regulated
ENSG00000138821	ENSG00000138821.13	SLC39A8	102251080	102431258	-1	mRNA	solute carrier family 39 member 8 [Source:HGNC Symbol;Acc:HGNC:20862]	1193.16	-0.278912	0.103342	0.000772541	0.0152348	3164	1505	1448	1192	1145	1155	1373	1149	1744.98	1585.09	1487.88	1182.08	1183.19	1191.06	1216.56	1185.88	Down Regulated
ENSG00000073150	ENSG00000073150.13	PANX2	50170731	50180295	1	mRNA	pannexin 2 [Source:HGNC Symbol;Acc:HGNC:8600]	51.5781	0.78796	0.34509	0.000776702	0.015302	44	14	9	44	37	51	48	51	24.2665	14.745	9.24789	43.6339	38.2342	52.5921	42.5309	52.6372	Up Regulated
ENSG00000114315	ENSG00000114315.4	HES1	194136148	194138732	1	mRNA	hes family bHLH transcription factor 1 [Source:HGNC Symbol;Acc:HGNC:5192]	117.647	0.46882	0.195129	0.000780381	0.0153447	89	85	76	112	117	128	125	115	49.0845	89.5231	78.0933	111.068	120.903	131.996	110.758	118.692	Up Regulated
ENSG00000072736	ENSG00000072736.19	NFATC3	68084751	68229259	1	mRNA	nuclear factor of activated T cells 3 [Source:HGNC Symbol;Acc:HGNC:7777]	2063.58	0.199496	0.0687386	0.000781602	0.015345	2526	1708	1858	2038	2062	2015	2250	2045	1393.12	1798.89	1909.18	2021.04	2130.78	2077.9	1993.64	2110.65	Up Regulated
ENSG00000104324	ENSG00000104324.16	CPQ	96645242	97149654	1	mRNA	carboxypeptidase Q [Source:HGNC Symbol;Acc:HGNC:16910]	2057.23	0.183479	0.0621068	0.000783385	0.0153592	3444	1943	1990	2328	2269	2310	2813	2274	1899.4	2046.39	2044.81	2308.63	2344.69	2382.11	2492.49	2347	Up Regulated
ENSG00000103121	ENSG00000103121.8	CMC2	80966448	81020270	-1	mRNA	C-X9-C motif containing 2 [Source:HGNC Symbol;Acc:HGNC:24447]	493.158	-0.27426	0.10148	0.00078533	0.0153825	925	465	560	451	403	396	427	400	510.148	489.744	575.424	447.248	416.443	408.362	378.348	412.841	Down Regulated
ENSG00000148154	ENSG00000148154.10	UGCG	111896814	111935369	1	mRNA	UDP-glucose ceramide glucosyltransferase [Source:HGNC Symbol;Acc:HGNC:12524]	1518.92	0.352096	0.138049	0.000788347	0.0154267	1621	1604	1126	2047	2010	1841	2154	1811	894	1689.35	1157.01	2029.97	2077.05	1898.47	1908.57	1869.14	Up Regulated
ENSG00000176014	ENSG00000176014.12	TUBB6	12307669	12344320	1	mRNA	tubulin beta 6 class V [Source:HGNC Symbol;Acc:HGNC:20776]	3320.03	-0.245763	0.0887244	0.000790185	0.0154383	7397	3866	3700	3080	2750	3021	3548	3101	4079.53	4071.72	3801.91	3054.37	2841.73	3115.31	3143.74	3200.55	Down Regulated
ENSG00000120699	ENSG00000120699.13	EXOSC8	36998816	37025881	1	mRNA	exosome component 8 [Source:HGNC Symbol;Acc:HGNC:17035]	458.426	-0.250419	0.0913661	0.000790459	0.0154383	1036	452	535	426	390	408	454	414	571.366	476.052	549.736	422.456	403.009	420.737	402.271	427.29	Down Regulated
ENSG00000048707	ENSG00000048707.15	VPS13D	12230030	12512047	1	mRNA	vacuolar protein sorting 13 homolog D [Source:HGNC Symbol;Acc:HGNC:23595]	4268.35	0.166633	0.0554408	0.000792623	0.0154657	5928	3462	3521	4104	4019	4046	4662	4008	3269.36	3646.22	3617.98	4069.85	4153.06	4172.31	4130.81	4136.66	Up Regulated
ENSG00000157827	ENSG00000157827.20	FMNL2	152335174	152649826	1	mRNA	formin like 2 [Source:HGNC Symbol;Acc:HGNC:18267]	6372.82	0.251021	0.0912694	0.00080275	0.0156482	11462	7851	6869	9301	9548	9203	10585	8837	6321.42	8268.77	7058.2	9223.62	9866.49	9490.3	9378.95	9120.68	Up Regulated
ENSG00000164104	ENSG00000164104.11	HMGB2	173331376	173334432	-1	mRNA	high mobility group box 2 [Source:HGNC Symbol;Acc:HGNC:5000]	3222.01	-0.287595	0.107968	0.000804355	0.0156607	6686	3974	4841	3216	2994	3031	3559	3167	3687.4	4185.47	4974.34	3189.24	3093.87	3125.62	3153.49	3268.67	Down Regulated
ENSG00000120875	ENSG00000120875.9	DUSP4	29333064	29350684	-1	mRNA	dual specificity phosphatase 4 [Source:HGNC Symbol;Acc:HGNC:3070]	1598.09	0.380182	0.151944	0.00080493	0.0156607	1738	1577	1215	2332	2149	2109	2408	1938	958.526	1660.92	1248.47	2312.6	2220.68	2174.84	2133.63	2000.21	Up Regulated
ENSG00000101412	ENSG00000101412.13	E2F1	33675477	33686385	-1	mRNA	E2F transcription factor 1 [Source:HGNC Symbol;Acc:HGNC:3113]	875.74	-0.501683	0.210921	0.000805913	0.0156648	2163	952	1175	707	557	638	802	689	1192.92	1002.66	1207.36	701.118	575.58	657.917	710.62	711.118	Down Regulated
ENSG00000182831	ENSG00000182831.12	C16orf72	9091644	9121635	1	mRNA	chromosome 16 open reading frame 72 [Source:HGNC Symbol;Acc:HGNC:30103]	3746.52	0.172177	0.0577535	0.00080898	0.0157094	5831	3425	3200	3871	3839	3736	4628	3886	3215.86	3607.25	3288.14	3838.79	3967.06	3852.63	4100.69	4010.75	Up Regulated
ENSG00000051825	ENSG00000051825.14	MPHOSPH9	123152320	123244014	-1	mRNA	M-phase phosphoprotein 9 [Source:HGNC Symbol;Acc:HGNC:7215]	1508.03	-0.237198	0.0852361	0.000811502	0.0157433	2741	1472	1832	1286	1330	1197	1400	1245	1511.69	1550.33	1882.46	1275.3	1374.36	1234.37	1240.48	1284.97	Down Regulated
ENSG00000105643	ENSG00000105643.10	ARRDC2	18001132	18014102	1	mRNA	arrestin domain containing 2 [Source:HGNC Symbol;Acc:HGNC:25225]	663.171	0.387134	0.155628	0.000813989	0.0157685	884	709	584	912	891	943	1091	912	487.536	746.728	600.086	904.412	920.721	972.439	966.692	941.277	Up Regulated
ENSG00000156030	ENSG00000156030.13	MIDEAS	73715122	73790285	-1	mRNA	mitotic deacetylase associated SANT domain protein [Source:HGNC Symbol;Acc:HGNC:19853]	3702.26	0.273227	0.101536	0.000814353	0.0157685	5058	3064	3054	3874	4035	4183	4255	3887	2789.54	3227.04	3138.12	3841.77	4169.59	4313.59	3770.19	4011.78	Up Regulated
ENSG00000172661	ENSG00000172661.18	WASHC2C	45727200	45792964	1	mRNA	WASH complex subunit 2C [Source:HGNC Symbol;Acc:HGNC:23414]	935.8	0.191596	0.0657685	0.000821745	0.0158832	1328	690	733	852	863	862	1056	806	732.407	726.717	753.19	844.911	891.787	888.91	935.679	831.874	Up Regulated
ENSG00000152127	ENSG00000152127.9	MGAT5	134119983	134454621	1	mRNA	alpha-1,6-mannosylglycoprotein 6-beta-N-acetylglucosaminyltransferase [Source:HGNC Symbol;Acc:HGNC:7049]	2527.25	0.162765	0.0541385	0.000821841	0.0158832	3464	2151	1964	2231	2289	2366	2628	2306	1910.43	2265.46	2018.1	2212.44	2365.35	2439.86	2328.57	2380.03	Up Regulated
ENSG00000184260	ENSG00000184260.5	H2AC20	149886918	149887411	1	mRNA	H2A clustered histone 20 [Source:HGNC Symbol;Acc:HGNC:4738]	1936.98	-0.513756	0.217943	0.000827039	0.0159685	5268	3262	3620	2065	1762	1825	2432	1821	2905.36	3435.58	3719.71	2047.82	1820.77	1881.97	2154.9	1879.46	Down Regulated
ENSG00000185591	ENSG00000185591.10	SP1	53380176	53416446	1	mRNA	Sp1 transcription factor [Source:HGNC Symbol;Acc:HGNC:11205]	7963.41	0.160466	0.0532799	0.000830021	0.0159956	10973	7322	7478	8812	8676	8182	9413	8116	6051.73	7711.62	7683.97	8738.68	8965.4	8437.43	8340.48	8376.54	Up Regulated
ENSG00000161011	ENSG00000161011.20	SQSTM1	179806398	179838078	1	mRNA	sequestosome 1 [Source:HGNC Symbol;Acc:HGNC:11280]	55.1061	0.667185	0.286394	0.000836474	0.016061	39	18	23	20	39	40	32	40	21.5089	18.9578	23.6335	19.8336	40.3009	41.2487	28.3539	41.2841	Up Regulated
ENSG00000149289	ENSG00000149289.11	ZC3H12C	110093392	110171841	1	mRNA	zinc finger CCCH-type containing 12C [Source:HGNC Symbol;Acc:HGNC:29362]	4926.17	0.453444	0.188709	0.000836668	0.016061	3164	3479	2942	4348	4619	4457	5548	4428	1744.98	3664.13	3023.03	4311.82	4773.07	4596.14	4915.86	4570.15	Up Regulated
ENSG00000108384	ENSG00000108384.15	RAD51C	58692573	58735611	1	mRNA	RAD51 paralog C [Source:HGNC Symbol;Acc:HGNC:9820]	407.404	-0.284025	0.106765	0.000837125	0.016061	835	425	478	322	314	310	400	351	460.512	447.615	491.166	319.321	324.474	319.678	354.424	362.268	Down Regulated
ENSG00000100650	ENSG00000100650.15	SRSF5	69726900	69772005	1	mRNA	serine and arginine rich splicing factor 5 [Source:HGNC Symbol;Acc:HGNC:10787]	3611.35	0.170758	0.0573926	0.00083736	0.016061	5621	2922	3303	3387	3342	3715	4194	3639	3100.04	3077.49	3393.98	3358.82	3453.48	3830.98	3716.14	3755.82	Up Regulated
ENSG00000189308	ENSG00000189308.11	LIN54	82909973	83012926	-1	mRNA	lin-54 DREAM MuvB core complex component [Source:HGNC Symbol;Acc:HGNC:25397]	1085.37	-0.280693	0.105325	0.000837596	0.016061	2335	1123	1431	955	954	918	1055	981	1287.78	1182.76	1470.41	947.054	985.822	946.658	934.793	1012.49	Down Regulated
ENSG00000133739	ENSG00000133739.16	LRRCC1	85107215	85146080	1	mRNA	leucine rich repeat and coiled-coil centrosomal protein 1 [Source:HGNC Symbol;Acc:HGNC:29373]	566.957	-0.322169	0.124801	0.000838157	0.016061	1404	686	774	576	574	491	618	524	774.322	722.504	795.319	571.208	593.147	506.328	547.585	540.821	Down Regulated
ENSG00000273831	ENSG00000273831.2	LRRC56	537527	554915	1	mRNA	leucine rich repeat containing 56 [Source:HGNC Symbol;Acc:HGNC:25430]	38.2593	-0.771785	0.342123	0.000840372	0.0160822	118	41	60	43	18	35	32	24	65.0783	43.1817	61.6526	42.6422	18.6004	36.0926	28.3539	24.7704	Down Regulated
ENSG00000133805	ENSG00000133805.15	AMPD3	10308313	10507579	1	mRNA	adenosine monophosphate deaminase 3 [Source:HGNC Symbol;Acc:HGNC:470]	2502.85	0.396644	0.160954	0.000840846	0.0160822	2155	1342	1007	1557	1779	1816	2024	1714	1188.51	1413.41	1034.74	1544.05	1838.34	1872.69	1793.39	1769.02	Up Regulated
ENSG00000252222	ENSG00000252222.1	RNU7-13P	184821428	184821489	-1	mRNA	RNA, U7 small nuclear 13 pseudogene [Source:HGNC Symbol;Acc:HGNC:34109]	16.1192	-0.793079	0.34876	0.00084578	0.0161613	24	30	25	22	11	8	11	14	13.2363	31.5964	25.6886	21.817	11.3669	8.24975	9.74666	14.4494	Down Regulated
ENSG00000175820	ENSG00000175820.3	CCDC168	102729367	102759072	-1	mRNA	coiled-coil domain containing 168 [Source:HGNC Symbol;Acc:HGNC:26851]	32.9694	-0.751757	0.321354	0.000850359	0.0162183	54	30	23	21	11	11	16	18	29.7816	31.5964	23.6335	20.8253	11.3669	11.3434	14.177	18.5778	Down Regulated
ENSG00000144452	ENSG00000144452.15	ABCA12	214931542	215138626	-1	mRNA	ATP binding cassette subfamily A member 12 [Source:HGNC Symbol;Acc:HGNC:14637]	87.0023	-0.655259	0.287823	0.000855908	0.0163088	135	67	104	23	40	36	38	41	74.454	70.5653	106.865	22.8086	41.3343	37.1239	33.6703	42.3162	Down Regulated
ENSG00000171428	ENSG00000171428.14	NAT1	18170477	18223689	1	mRNA	N-acetyltransferase 1 [Source:HGNC Symbol;Acc:HGNC:7645]	476.097	-0.238932	0.0885423	0.0008631	0.0164304	1306	512	591	553	479	460	564	508	720.274	539.245	607.278	548.399	494.978	474.36	499.738	524.308	Down Regulated
ENSG00000104765	ENSG00000104765.16	BNIP3L	26383054	26505636	1	mRNA	BCL2 interacting protein 3 like [Source:HGNC Symbol;Acc:HGNC:1085]	1550.71	0.26662	0.0993147	0.000864145	0.0164349	2307	1399	1452	1806	1877	1857	2121	1708	1272.34	1473.44	1491.99	1790.97	1939.61	1914.97	1879.33	1762.83	Up Regulated
ENSG00000128918	ENSG00000128918.15	ALDH1A2	57953424	58497866	-1	mRNA	aldehyde dehydrogenase 1 family member A2 [Source:HGNC Symbol;Acc:HGNC:15472]	678.836	-0.332371	0.130427	0.000865331	0.0164421	1592	1057	1012	746	666	734	753	713	878.006	1113.25	1039.87	739.793	688.215	756.914	667.203	735.888	Down Regulated
ENSG00000164675	ENSG00000164675.11	IQUB	123452193	123535077	-1	mRNA	IQ motif and ubiquitin domain containing [Source:HGNC Symbol;Acc:HGNC:21995]	24.8561	-0.939586	0.424023	0.000866242	0.016444	84	30	35	17	10	12	21	15	46.3269	31.5964	35.964	16.8586	10.3336	12.3746	18.6073	15.4815	Down Regulated
ENSG00000145431	ENSG00000145431.11	PDGFC	156760454	156971799	-1	mRNA	platelet derived growth factor C [Source:HGNC Symbol;Acc:HGNC:8801]	1535.9	0.17595	0.0597694	0.000867907	0.0164603	2432	1746	1505	1784	1833	1793	2097	1764	1341.28	1838.91	1546.45	1769.16	1894.14	1848.97	1858.07	1820.63	Up Regulated
ENSG00000005189	ENSG00000005189.19	REXO5	20806429	20849665	1	mRNA	RNA exonuclease 5 [Source:HGNC Symbol;Acc:HGNC:24661]	222.482	-0.360403	0.147896	0.000869997	0.0164845	316	179	246	144	125	133	166	134	174.278	188.525	252.776	142.802	129.17	137.152	147.086	138.302	Down Regulated
ENSG00000122224	ENSG00000122224.18	LY9	160796074	160828261	1	mRNA	lymphocyte antigen 9 [Source:HGNC Symbol;Acc:HGNC:6730]	157.795	0.368088	0.148553	0.00087153	0.0164982	175	132	118	225	197	202	211	178	96.5145	139.024	121.25	223.128	203.571	208.306	186.959	183.714	Up Regulated
ENSG00000122359	ENSG00000122359.18	ANXA11	80150889	80205572	-1	mRNA	annexin A11 [Source:HGNC Symbol;Acc:HGNC:535]	5919.66	0.273807	0.102777	0.00087327	0.0165157	4510	3382	2944	4266	3994	3894	4792	4140	2487.32	3561.97	3025.09	4230.51	4127.23	4015.56	4246	4272.9	Up Regulated
ENSG00000087589	ENSG00000087589.16	CASS4	56412112	56460387	1	mRNA	Cas scaffold protein family member 4 [Source:HGNC Symbol;Acc:HGNC:15878]	974.734	0.380158	0.154168	0.000878666	0.0165946	881	1015	807	1334	1323	1253	1380	1195	485.881	1069.01	829.228	1322.9	1367.13	1292.12	1222.76	1233.36	Up Regulated
ENSG00000157212	ENSG00000157212.18	PAXIP1	154943687	155003124	-1	mRNA	PAX interacting protein 1 [Source:HGNC Symbol;Acc:HGNC:8624]	483.326	-0.19871	0.0692486	0.000881799	0.0166305	892	435	547	414	422	399	433	403	491.948	458.148	562.066	410.556	436.076	411.456	383.664	415.937	Down Regulated
ENSG00000151553	ENSG00000151553.15	FHIP2A	114821744	114899832	1	mRNA	FHF complex subunit HOOK interacting protein 2A [Source:HGNC Symbol;Acc:HGNC:29320]	451.078	0.269282	0.101008	0.000883679	0.0166454	510	312	340	422	420	417	480	406	281.271	328.602	349.365	418.489	434.01	430.018	425.309	419.033	Up Regulated
ENSG00000243317	ENSG00000243317.8	STMP1	135662496	135693418	1	mRNA	short transmembrane mitochondrial protein 1 [Source:HGNC Symbol;Acc:HGNC:41909]	1067.32	0.218446	0.0778548	0.000884228	0.0166454	1683	978	923	1106	1131	1130	1344	1200	928.193	1030.04	948.423	1096.8	1168.73	1165.28	1190.86	1238.52	Up Regulated
ENSG00000213744	ENSG00000213744.3	RPS10P14	37375522	37376023	1	mRNA	ribosomal protein S10 pseudogene 14 [Source:HGNC Symbol;Acc:HGNC:35880]	15.4423	-1.04808	0.458054	0.000898621	0.0169007	27	8	23	8	3	7	7	5	14.8908	8.4257	23.6335	7.93344	3.10007	7.21853	6.20242	5.16051	Down Regulated
ENSG00000149679	ENSG00000149679.11	CABLES2	62388634	62407285	-1	mRNA	Cdk5 and Abl enzyme substrate 2 [Source:HGNC Symbol;Acc:HGNC:16143]	369.014	-0.342419	0.135943	0.000902451	0.0169486	632	308	367	244	229	265	254	227	348.555	324.39	377.109	241.97	236.639	273.273	225.059	234.287	Down Regulated
ENSG00000110422	ENSG00000110422.12	HIPK3	33256672	33357023	1	mRNA	homeodomain interacting protein kinase 3 [Source:HGNC Symbol;Acc:HGNC:4915]	14773.3	0.17826	0.0609082	0.000902835	0.0169486	29660	15543	16658	18088	18910	18426	22233	19061	16357.8	16370.1	17116.8	17937.5	19540.8	19001.2	19699.8	19672.9	Up Regulated
ENSG00000140876	ENSG00000140876.11	NUDT7	77722492	77742260	1	mRNA	nudix hydrolase 7 [Source:HGNC Symbol;Acc:HGNC:8054]	112.97	0.411163	0.170999	0.000904241	0.0169593	106	61	104	106	109	126	114	122	58.4602	64.246	106.865	105.118	112.636	129.934	101.011	125.916	Up Regulated
ENSG00000187790	ENSG00000187790.11	FANCM	45135930	45200890	1	mRNA	FA complementation group M [Source:HGNC Symbol;Acc:HGNC:23168]	556.738	-0.248487	0.0914973	0.000908261	0.017019	1141	552	674	513	507	447	576	461	629.274	581.374	692.564	508.732	523.912	460.955	510.371	475.799	Down Regulated
ENSG00000156273	ENSG00000156273.16	BACH1	29194071	29630751	1	mRNA	BTB domain and CNC homolog 1 [Source:HGNC Symbol;Acc:HGNC:935]	5972.88	0.18951	0.0657787	0.000925596	0.0173278	9273	5525	5899	6532	6719	6612	7580	6552	5114.16	5819	6061.48	6477.65	6943.12	6818.42	6716.34	6762.33	Up Regulated
ENSG00000170537	ENSG00000170537.13	TMC7	18983934	19063942	1	mRNA	transmembrane channel like 7 [Source:HGNC Symbol;Acc:HGNC:23000]	53.9799	-0.637052	0.283564	0.0009289	0.0173737	175	97	90	57	51	47	59	43	96.5145	102.162	92.4789	56.5258	52.7012	48.4673	52.2775	44.3804	Down Regulated
ENSG00000284559	ENSG00000284559.2		22520552	22559704	-1	mRNA		17.9039	0.886936	0.410695	0.000931598	0.0174081	12	12	6	21	32	28	25	15	6.61813	12.6386	6.16526	20.8253	33.0674	28.8741	22.1515	15.4815	Up Regulated
ENSG00000112941	ENSG00000112941.14	TENT4A	6713432	6757044	1	mRNA	terminal nucleotidyltransferase 4A [Source:HGNC Symbol;Acc:HGNC:16705]	884.24	0.231812	0.0833556	0.00094771	0.0176929	736	434	436	510	548	529	613	506	405.912	457.094	448.009	505.757	566.279	545.514	543.155	522.243	Up Regulated
ENSG00000173905	ENSG00000173905.8	GOLIM4	168008689	168095924	-1	mRNA	golgi integral membrane protein 4 [Source:HGNC Symbol;Acc:HGNC:15448]	2832.74	0.222483	0.0803039	0.000949129	0.0176999	5530	3355	3054	3951	3859	4053	4602	3938	3049.86	3533.53	3138.12	3918.13	3987.72	4179.53	4077.65	4064.42	Up Regulated
ENSG00000146281	ENSG00000146281.6	PM20D2	89146055	89165565	1	mRNA	peptidase M20 domain containing 2 [Source:HGNC Symbol;Acc:HGNC:21408]	804.82	-0.271946	0.102885	0.000949828	0.0176999	1744	866	937	788	713	673	863	675	961.836	912.082	962.808	781.444	736.783	694.01	764.67	696.669	Down Regulated
ENSG00000168298	ENSG00000168298.6	H1-4	26156329	26157115	1	mRNA	H1.4 linker histone, cluster member [Source:HGNC Symbol;Acc:HGNC:4718]	3567.9	-0.644188	0.290308	0.000952929	0.0177414	9461	5621	6063	3176	2626	2839	3352	2858	5217.85	5920.11	6230	3149.58	2713.59	2927.63	2970.07	2949.75	Down Regulated
ENSG00000187123	ENSG00000187123.15	LYPD6	149329985	149474138	1	mRNA	LY6/PLAUR domain containing 6 [Source:HGNC Symbol;Acc:HGNC:28751]	36.5329	-0.595426	0.262158	0.000957015	0.0177985	89	50	58	23	34	14	32	30	49.0845	52.6606	59.5975	22.8086	35.1341	14.4371	28.3539	30.963	Down Regulated
ENSG00000112414	ENSG00000112414.14	ADGRG6	142301854	142446266	1	mRNA	adhesion G protein-coupled receptor G6 [Source:HGNC Symbol;Acc:HGNC:13841]	116.072	-0.450872	0.190434	0.000957746	0.0177985	274	98	127	88	65	89	97	75	151.114	103.215	130.498	87.2678	67.1682	91.7784	85.9478	77.4076	Down Regulated
ENSG00000165501	ENSG00000165501.17	LRR1	49598761	49614672	1	mRNA	leucine rich repeat protein 1 [Source:HGNC Symbol;Acc:HGNC:19742]	458.823	-0.333255	0.132887	0.000961837	0.0178582	1060	553	656	444	430	373	454	475	584.602	582.427	674.069	440.306	444.343	384.644	402.271	490.248	Down Regulated
ENSG00000053254	ENSG00000053254.15	FOXN3	89124871	89619149	-1	mRNA	forkhead box N3 [Source:HGNC Symbol;Acc:HGNC:1928]	3799.7	0.149138	0.0496698	0.000967512	0.0179471	6160	3393	3630	3804	3827	3949	4524	4046	3397.31	3573.55	3729.98	3772.35	3954.66	4072.28	4008.54	4175.88	Up Regulated
ENSG00000265713	ENSG00000265713.1		29775747	29776701	-1	mRNA	RNA terminal phosphate cyclase-like 1 (RCL1) pseudogene	51.3667	-0.723111	0.317914	0.000968703	0.0179528	55	28	64	40	24	19	32	13	30.3331	29.49	65.7628	39.6672	24.8006	19.5931	28.3539	13.4173	Down Regulated
ENSG00000165238	ENSG00000165238.16	WNK2	93184122	93320572	1	mRNA	WNK lysine deficient protein kinase 2 [Source:HGNC Symbol;Acc:HGNC:14542]	48.4337	0.736691	0.333952	0.000975702	0.018066	51	17	20	23	45	45	56	32	28.1271	17.9046	20.5509	22.8086	46.501	46.4048	49.6194	33.0273	Up Regulated
ENSG00000230911	ENSG00000230911.1	PPIHP1	112029858	112030367	-1	mRNA	peptidylprolyl isomerase H pseudogene 1 [Source:HGNC Symbol;Acc:HGNC:31355]	208.506	-0.2894	0.111471	0.000980705	0.0181256	586	226	276	218	203	187	219	239	323.186	238.026	283.602	216.186	209.771	192.838	194.047	246.672	Down Regulated
ENSG00000135766	ENSG00000135766.8	EGLN1	231363751	231422287	-1	mRNA	egl-9 family hypoxia inducible factor 1 [Source:HGNC Symbol;Acc:HGNC:1232]	3619.21	-0.222911	0.0808345	0.000983387	0.0181587	7940	4353	4313	3501	3546	3366	3902	3394	4379	4584.64	4431.8	3471.87	3664.28	3471.08	3457.41	3502.95	Down Regulated
ENSG00000156500	ENSG00000156500.15	PABIR3	134796395	134854835	1	mRNA	PABIR family member 3 [Source:HGNC Symbol;Acc:HGNC:25202]	254.738	-0.326482	0.129937	0.00098479	0.0181681	460	243	286	196	188	181	205	189	253.695	255.931	293.877	194.369	194.271	186.651	181.642	195.067	Down Regulated
ENSG00000173559	ENSG00000173559.12	NABP1	191678068	191741097	1	mRNA	nucleic acid binding protein 1 [Source:HGNC Symbol;Acc:HGNC:26232]	6337.25	0.259598	0.0978071	0.000988776	0.0182121	7042	4900	4734	6037	6039	5954	7029	5829	3883.74	5160.74	4864.39	5986.77	6240.44	6139.87	6228.12	6016.12	Up Regulated
ENSG00000072274	ENSG00000072274.13	TFRC	196027183	196082096	-1	mRNA	transferrin receptor [Source:HGNC Symbol;Acc:HGNC:11763]	9275.26	0.225085	0.0818801	0.000988972	0.0182121	14171	8769	8318	10042	10149	10176	12176	10534	7815.47	9235.62	8547.11	9958.45	10487.5	10493.7	10788.7	10872.2	Up Regulated
ENSG00000130559	ENSG00000130559.19	CAMSAP1	135808487	135907546	-1	mRNA	calmodulin regulated spectrin associated protein 1 [Source:HGNC Symbol;Acc:HGNC:19946]	3025.06	0.218165	0.0788671	0.000996707	0.018338	4655	2968	2778	3388	3362	3454	4006	3484	2567.28	3125.94	2854.52	3359.81	3474.14	3561.83	3549.56	3595.84	Up Regulated
ENSG00000170458	ENSG00000170458.14	CD14	140631728	140633700	-1	mRNA	CD14 molecule [Source:HGNC Symbol;Acc:HGNC:1628]	1127.21	-0.694524	0.31938	0.00100031	0.0183709	7312	1241	1579	1158	797	1084	1287	1232	4032.65	1307.04	1622.49	1148.37	823.585	1117.84	1140.36	1271.55	Down Regulated
ENSG00000102007	ENSG00000102007.11	PLP2	49171898	49175235	1	mRNA	proteolipid protein 2 [Source:HGNC Symbol;Acc:HGNC:9087]	611.124	-0.367858	0.151337	0.00100402	0.0184225	947	808	751	520	484	443	501	519	522.281	850.996	771.685	515.674	500.145	456.83	443.916	535.661	Down Regulated
ENSG00000146416	ENSG00000146416.18	AIG1	143060496	143341058	1	mRNA	androgen induced 1 [Source:HGNC Symbol;Acc:HGNC:21607]	1100.59	-0.241389	0.0894692	0.00100829	0.0184774	2297	988	1142	1033	915	848	1031	944	1266.82	1040.57	1173.45	1024.41	945.521	874.473	913.528	974.304	Down Regulated
ENSG00000278129	ENSG00000278129.2	ZNF8	58278955	58302791	1	mRNA	zinc finger protein 8 [Source:HGNC Symbol;Acc:HGNC:13154]	516.308	0.223978	0.0817255	0.00100884	0.0184774	739	465	447	572	552	572	621	564	407.567	489.744	459.312	567.241	570.413	589.857	550.243	582.105	Up Regulated
ENSG00000187801	ENSG00000187801.15	ZFP69B	40450102	40463718	1	mRNA	ZFP69 zinc finger protein B [Source:HGNC Symbol;Acc:HGNC:28053]	1552.76	0.283612	0.109617	0.00101096	0.0184996	1601	908	1002	1266	1344	1312	1435	1167	882.969	956.317	1029.6	1255.47	1388.83	1352.96	1271.5	1204.46	Up Regulated
ENSG00000270524	ENSG00000270524.1	QTRT1P1	113882590	113883667	1	mRNA	queuine tRNA-ribosyltransferase catalytic subunit 1 pseudogene 1 [Source:HGNC Symbol;Acc:HGNC:39179]	145.487	-0.533399	0.233546	0.00101229	0.0185072	199	48	77	68	41	62	52	42	109.751	50.5542	79.1209	67.4342	42.3676	63.9355	46.0751	43.3483	Down Regulated
ENSG00000145936	ENSG00000145936.9	KCNMB1	170374671	170389634	-1	mRNA	potassium calcium-activated channel subfamily M regulatory beta subunit 1 [Source:HGNC Symbol;Acc:HGNC:6285]	1281.86	-0.394171	0.165012	0.00102063	0.0186431	2650	1844	1801	1147	1198	1099	1197	1079	1461.5	1942.12	1850.61	1137.46	1237.96	1133.31	1060.61	1113.64	Down Regulated
ENSG00000132669	ENSG00000132669.13	RIN2	19757606	20002457	1	mRNA	Ras and Rab interactor 2 [Source:HGNC Symbol;Acc:HGNC:18750]	2649.3	0.378769	0.157426	0.00103016	0.0187655	2087	3317	2438	3534	3658	3706	4041	3454	1151	3493.51	2505.15	3504.6	3780.02	3821.69	3580.57	3564.88	Up Regulated
ENSG00000244462	ENSG00000244462.8	RBM12	35648925	35664956	-1	mRNA	RNA binding motif protein 12 [Source:HGNC Symbol;Acc:HGNC:9898]	2860.4	0.146679	0.0473818	0.00103103	0.0187655	5710	2840	2805	3434	3462	3217	3874	3420	3149.13	2991.12	2882.26	3405.43	3577.48	3317.43	3432.6	3529.79	Up Regulated
ENSG00000034713	ENSG00000034713.8	GABARAPL2	75566375	75577881	1	mRNA	GABA type A receptor associated protein like 2 [Source:HGNC Symbol;Acc:HGNC:13291]	1038.88	0.239178	0.0889146	0.00103889	0.0188916	1545	913	946	1120	1135	1103	1401	1138	852.085	961.583	972.056	1110.68	1172.86	1137.43	1241.37	1174.53	Up Regulated
ENSG00000164985	ENSG00000164985.15	PSIP1	15464066	15510995	-1	mRNA	PC4 and SFRS1 interacting protein 1 [Source:HGNC Symbol;Acc:HGNC:9527]	1312.25	-0.28032	0.108427	0.00104104	0.0188968	2347	1247	1569	1131	1053	947	1184	1080	1294.4	1313.36	1612.22	1121.59	1088.12	976.564	1049.1	1114.67	Down Regulated
ENSG00000076248	ENSG00000076248.10	UNG	109097597	109110992	1	mRNA	uracil DNA glycosylase [Source:HGNC Symbol;Acc:HGNC:12572]	778.342	-0.238985	0.088655	0.00104104	0.0188968	2061	804	929	747	715	740	860	753	1136.66	846.783	954.588	740.785	738.85	763.102	762.012	777.173	Down Regulated
ENSG00000164828	ENSG00000164828.18	SUN1	816615	896435	1	mRNA	Sad1 and UNC84 domain containing 1 [Source:HGNC Symbol;Acc:HGNC:18587]	1236.4	0.198396	0.0705449	0.00104209	0.0188991	2274	1327	1237	1694	1497	1701	1877	1536	1254.14	1397.61	1271.07	1679.91	1546.93	1754.1	1663.13	1585.31	Up Regulated
ENSG00000173926	ENSG00000173926.6	MARCHF3	126867714	127030558	-1	mRNA	membrane associated ring-CH-type finger 3 [Source:HGNC Symbol;Acc:HGNC:28728]	234.707	-0.265561	0.102685	0.00104482	0.0189316	505	195	232	211	187	198	188	187	278.513	205.377	238.39	209.244	193.238	204.181	166.579	193.003	Down Regulated
ENSG00000128059	ENSG00000128059.8	PPAT	56393362	56435615	-1	mRNA	phosphoribosyl pyrophosphate amidotransferase [Source:HGNC Symbol;Acc:HGNC:9238]	578.334	-0.279185	0.1078	0.0010459	0.0189343	1573	715	686	542	561	563	625	546	867.527	753.047	704.895	537.491	579.713	580.576	553.788	563.527	Down Regulated
ENSG00000164109	ENSG00000164109.14	MAD2L1	120055623	120066858	-1	mRNA	mitotic arrest deficient 2 like 1 [Source:HGNC Symbol;Acc:HGNC:6763]	714.787	-0.390888	0.164278	0.00105669	0.0190882	1829	997	1334	670	713	627	835	771	1008.71	1050.05	1370.74	664.426	736.783	646.574	739.86	795.75	Down Regulated
ENSG00000135677	ENSG00000135677.11	GNS	64713445	64759431	-1	mRNA	glucosamine (N-acetyl)-6-sulfatase [Source:HGNC Symbol;Acc:HGNC:4422]	12190.2	0.205723	0.0738634	0.00105698	0.0190882	15485	8920	8748	10898	11024	10722	12482	10626	8540.15	9394.66	8988.95	10807.3	11391.7	11056.7	11059.8	10967.1	Up Regulated
ENSG00000155897	ENSG00000155897.10	ADCY8	130780301	131040909	-1	mRNA	adenylate cyclase 8 [Source:HGNC Symbol;Acc:HGNC:239]	1317.71	0.496062	0.219471	0.00106744	0.0192025	968	1215	783	1781	1717	1695	1907	1525	533.863	1279.65	804.567	1766.18	1774.27	1747.91	1689.72	1573.96	Up Regulated
ENSG00000135253	ENSG00000135253.13	KCP	128862042	128910719	-1	mRNA	kielin cysteine rich BMP regulator [Source:HGNC Symbol;Acc:HGNC:17585]	279.844	0.617205	0.283432	0.00106768	0.0192025	238	180	226	510	439	465	512	434	131.26	189.578	232.225	505.757	453.644	479.516	453.663	447.932	Up Regulated
ENSG00000139174	ENSG00000139174.12	PRICKLE1	42456757	42590355	-1	mRNA	prickle planar cell polarity protein 1 [Source:HGNC Symbol;Acc:HGNC:17019]	449.043	-0.433774	0.186522	0.00106777	0.0192025	723	268	382	239	253	237	206	206	398.743	282.261	392.522	237.012	261.439	244.399	182.528	212.613	Down Regulated
ENSG00000266946	ENSG00000266946.1	MRPL37P1	58690356	58692153	1	mRNA	mitochondrial ribosomal protein L37 pseudogene 1 [Source:HGNC Symbol;Acc:HGNC:31003]	22.0354	0.614048	0.2749	0.00106828	0.0192025	57	11	16	24	31	37	44	41	31.4361	11.5853	16.4407	23.8003	32.0341	38.1551	38.9866	42.3162	Up Regulated
ENSG00000135324	ENSG00000135324.6	MRAP2	84033772	84090881	1	mRNA	melanocortin 2 receptor accessory protein 2 [Source:HGNC Symbol;Acc:HGNC:21232]	37.9531	0.645841	0.30143	0.00107166	0.0192463	10	24	15	32	34	25	31	40	5.51511	25.2771	15.4132	31.7338	35.1341	25.7805	27.4679	41.2841	Up Regulated
ENSG00000134574	ENSG00000134574.11	DDB2	47214465	47239217	1	mRNA	damage specific DNA binding protein 2 [Source:HGNC Symbol;Acc:HGNC:2718]	433.85	-0.31532	0.122066	0.00108105	0.0193662	852	476	525	412	345	371	406	370	469.888	501.329	539.46	408.572	356.508	382.582	359.74	381.878	Down Regulated
ENSG00000112110	ENSG00000112110.10	MRPL18	159789812	159798436	1	mRNA	mitochondrial ribosomal protein L18 [Source:HGNC Symbol;Acc:HGNC:14477]	1669.58	-0.188392	0.066461	0.0010812	0.0193662	3601	1859	1910	1719	1552	1577	1835	1654	1985.99	1957.92	1962.61	1704.7	1603.77	1626.23	1625.92	1707.1	Down Regulated
ENSG00000147174	ENSG00000147174.11	GCNA	71578437	71613583	1	mRNA	germ cell nuclear acidic peptidase [Source:HGNC Symbol;Acc:HGNC:15805]	113.91	0.380002	0.160279	0.00108454	0.0193919	110	92	78	105	114	107	119	128	60.6662	96.8956	80.1484	104.126	117.803	110.34	105.441	132.109	Up Regulated
ENSG00000120696	ENSG00000120696.8	KBTBD7	41189834	41194569	-1	mRNA	kelch repeat and BTB domain containing 7 [Source:HGNC Symbol;Acc:HGNC:25266]	301.323	-0.279674	0.108387	0.0010885	0.0194456	989	326	424	322	291	332	393	313	545.445	343.347	435.679	319.321	300.707	342.364	348.222	323.048	Down Regulated
ENSG00000064995	ENSG00000064995.17	TAF11	34877462	34889192	-1	mRNA	TATA-box binding protein associated factor 11 [Source:HGNC Symbol;Acc:HGNC:11544]	1252.03	-0.152105	0.0514718	0.0010915	0.019482	2709	1505	1453	1398	1284	1271	1452	1336	1494.04	1585.09	1493.02	1386.37	1326.83	1310.68	1286.56	1378.89	Down Regulated
ENSG00000214534	ENSG00000214534.5	ZNF705EP	71814045	71821548	-1	mRNA	zinc finger protein 705E, pseudogene [Source:HGNC Symbol;Acc:HGNC:33203]	18.636	-0.812227	0.373943	0.00109699	0.0195628	27	18	30	14	7	9	8	13	14.8908	18.9578	30.8263	13.8835	7.2335	9.28096	7.08848	13.4173	Down Regulated
ENSG00000166598	ENSG00000166598.15	HSP90B1	103930107	103953931	1	mRNA	heat shock protein 90 beta family member 1 [Source:HGNC Symbol;Acc:HGNC:12028]	16994.8	-0.244239	0.0918944	0.00109872	0.0195764	43978	14761	15630	14222	14248	13331	15878	14300	24254.4	15546.5	16060.5	14103.7	14723.3	13747.2	14068.9	14759.1	Down Regulated
ENSG00000267056	ENSG00000267056.2		15910582	15911824	-1	mRNA	inositol polyphosphate multikinase (IPMK) pseudogene	24.9654	-0.617946	0.278714	0.00110009	0.0195838	65	27	30	31	16	23	17	18	35.8482	28.4367	30.8263	30.7421	16.5337	23.718	15.063	18.5778	Down Regulated
ENSG00000226752	ENSG00000226752.9	CUTALP	120824828	120854385	1	mRNA	cutA divalent cation tolerance like, pseudogene [Source:HGNC Symbol;Acc:HGNC:27367]	309.751	0.273199	0.106078	0.00110685	0.0196755	507	270	341	353	460	363	392	374	279.616	284.367	350.392	350.063	475.344	374.332	347.336	386.006	Up Regulated
ENSG00000010704	ENSG00000010704.18	HFE	26087281	26098343	1	mRNA	homeostatic iron regulator [Source:HGNC Symbol;Acc:HGNC:4886]	49.4935	0.552077	0.251698	0.00110718	0.0196755	47	27	34	72	62	62	71	65	25.921	28.4367	34.9365	71.401	64.0681	63.9355	62.9103	67.0866	Up Regulated
ENSG00000260685	ENSG00000260685.1		75950464	75951144	-1	mRNA	RWD domain containing 1 (RWDD1) pseudogene	8.51352	-1.52298	0.671072	0.00111172	0.0197388	21	6	7	9	3	4	1	1	11.5817	6.31928	7.19281	8.92512	3.10007	4.12487	0.88606	1.0321	Down Regulated
ENSG00000138587	ENSG00000138587.6	MNS1	56421544	56465137	-1	mRNA	meiosis specific nuclear structural 1 [Source:HGNC Symbol;Acc:HGNC:29636]	268.98	-0.387223	0.164036	0.00111509	0.0197815	485	312	402	230	210	211	254	215	267.483	328.602	413.073	228.086	217.005	217.587	225.059	221.902	Down Regulated
ENSG00000099290	ENSG00000099290.17	WASHC2A	50067888	50133509	1	mRNA	WASH complex subunit 2A [Source:HGNC Symbol;Acc:HGNC:23416]	620.99	0.197407	0.0699238	0.00111771	0.0197957	886	517	469	592	590	595	732	556	488.639	544.511	481.918	587.075	609.68	613.575	648.596	573.849	Up Regulated
ENSG00000198056	ENSG00000198056.14	PRIM1	56731296	56752374	-1	mRNA	DNA primase subunit 1 [Source:HGNC Symbol;Acc:HGNC:9369]	226.986	-0.42132	0.181506	0.00111785	0.0197957	593	239	340	205	183	201	222	186	327.046	251.718	349.365	203.294	189.104	207.275	196.705	191.971	Down Regulated
ENSG00000063046	ENSG00000063046.17	EIF4B	53006282	53042215	1	mRNA	eukaryotic translation initiation factor 4B [Source:HGNC Symbol;Acc:HGNC:3285]	7395.48	0.195035	0.0696575	0.00112037	0.0198232	15179	9410	8591	10945	10963	10806	12278	10633	8371.39	9910.73	8827.63	10853.9	11328.7	11143.3	10879	10974.3	Up Regulated
ENSG00000157193	ENSG00000157193.16	LRP8	53242364	53328469	-1	mRNA	LDL receptor related protein 8 [Source:HGNC Symbol;Acc:HGNC:6700]	2892.4	0.166919	0.0577703	0.00113988	0.0201507	4756	2441	2507	3217	3191	3017	3357	3001	2622.99	2570.89	2576.05	3190.23	3297.44	3111.19	2974.5	3097.34	Up Regulated
ENSG00000177425	ENSG00000177425.11	PAWR	79574979	79690964	-1	mRNA	pro-apoptotic WT1 regulator [Source:HGNC Symbol;Acc:HGNC:8614]	134.679	-0.483313	0.214908	0.001158	0.0204534	138	93	73	53	58	36	54	50	76.1085	97.9488	75.0107	52.559	59.9347	37.1239	47.8472	51.6051	Down Regulated
ENSG00000143799	ENSG00000143799.13	PARP1	226360210	226408154	-1	mRNA	poly(ADP-ribose) polymerase 1 [Source:HGNC Symbol;Acc:HGNC:270]	11783.1	-0.207167	0.0753909	0.00116378	0.0205077	23737	12344	12962	10555	9792	10306	11935	10583	13091.2	13000.9	13319	10467.2	10118.6	10627.7	10575.1	10922.7	Down Regulated
ENSG00000233588	ENSG00000233588.1	CYP51A1P2	28722386	28724021	-1	mRNA	cytochrome P450 family 51 subfamily A member 1 pseudogene 2 [Source:HGNC Symbol;Acc:HGNC:20251]	660.608	0.277484	0.108984	0.00116397	0.0205077	994	820	789	933	985	922	1120	961	548.202	863.635	810.732	925.237	1017.86	950.783	992.387	991.85	Up Regulated
ENSG00000198464	ENSG00000198464.14	ZNF480	52297169	52325922	1	mRNA	zinc finger protein 480 [Source:HGNC Symbol;Acc:HGNC:23305]	972.162	-0.266034	0.103178	0.00117473	0.0206769	2591	1053	1021	946	914	820	1072	870	1428.97	1109.03	1049.12	938.129	944.488	845.599	949.856	897.928	Down Regulated
ENSG00000108389	ENSG00000108389.9	MTMR4	58489529	58517905	-1	mRNA	myotubularin related protein 4 [Source:HGNC Symbol;Acc:HGNC:7452]	1798.68	-0.149714	0.0508913	0.00117647	0.0206895	4192	1940	1938	1866	1835	1755	1964	1828	2311.93	2043.23	1991.38	1850.47	1896.21	1809.79	1740.22	1886.68	Down Regulated
ENSG00000178999	ENSG00000178999.13	AURKB	8204733	8210600	-1	mRNA	aurora kinase B [Source:HGNC Symbol;Acc:HGNC:11390]	185.771	-0.532303	0.244069	0.00118158	0.0207615	235	179	241	122	92	88	119	129	129.605	188.525	247.638	120.985	95.0688	90.7472	105.441	133.141	Down Regulated
ENSG00000172927	ENSG00000172927.8	MYEOV	69294151	69341682	1	mRNA	myeloma overexpressed [Source:HGNC Symbol;Acc:HGNC:7563]	142.613	0.579991	0.271064	0.00118297	0.0207636	49	66	32	62	75	74	91	78	27.024	69.5121	32.8814	61.4842	77.5017	76.3102	80.6315	80.5039	Up Regulated
ENSG00000081181	ENSG00000081181.8	ARG2	67619920	67651708	1	mRNA	arginase 2 [Source:HGNC Symbol;Acc:HGNC:664]	106.408	-0.41804	0.180914	0.00118375	0.0207636	263	75	132	110	80	85	83	83	145.047	78.991	135.636	109.085	82.6685	87.6536	73.543	85.6644	Down Regulated
ENSG00000173207	ENSG00000173207.13	CKS1B	154974653	154979251	1	mRNA	CDC28 protein kinase regulatory subunit 1B [Source:HGNC Symbol;Acc:HGNC:19083]	267.395	-0.355685	0.14916	0.00118512	0.0207698	520	316	401	206	230	193	253	239	286.786	332.815	412.045	204.286	237.672	199.025	224.173	246.672	Down Regulated
ENSG00000127463	ENSG00000127463.15	EMC1	19215660	19251552	-1	mRNA	ER membrane protein complex subunit 1 [Source:HGNC Symbol;Acc:HGNC:28957]	2400.64	0.145537	0.0493203	0.00118703	0.0207853	3921	2173	1990	2365	2513	2407	2611	2414	2162.48	2288.63	2044.81	2345.32	2596.82	2482.14	2313.5	2491.49	Up Regulated
ENSG00000238000	ENSG00000238000.1	PSME2P1	98213402	98214121	1	mRNA	proteasome activator subunit 2 pseudogene 1 [Source:HGNC Symbol;Acc:HGNC:20632]	671.946	-0.267327	0.102283	0.00119385	0.0208843	1630	792	717	722	589	605	796	606	898.963	834.145	736.749	715.993	608.647	623.887	705.304	625.454	Down Regulated
ENSG00000092094	ENSG00000092094.11	OSGEP	20446401	20455089	-1	mRNA	O-sialoglycoprotein endopeptidase [Source:HGNC Symbol;Acc:HGNC:18028]	817.444	-0.160435	0.0555639	0.00119474	0.0208843	1783	1041	943	914	869	861	967	821	983.344	1096.39	968.974	906.396	897.987	887.879	856.82	847.355	Down Regulated
ENSG00000135315	ENSG00000135315.12	CEP162	84124241	84227643	-1	mRNA	centrosomal protein 162 [Source:HGNC Symbol;Acc:HGNC:21107]	539.764	-0.27364	0.107266	0.00119762	0.0209166	1245	588	661	516	498	475	563	472	686.631	619.289	679.206	511.707	514.612	489.829	498.852	487.152	Down Regulated
ENSG00000137203	ENSG00000137203.12	TFAP2A	10393186	10419659	-1	mRNA	transcription factor AP-2 alpha [Source:HGNC Symbol;Acc:HGNC:11742]	50.1172	0.585969	0.274498	0.00119908	0.0209242	35	30	30	33	50	55	44	41	19.3029	31.5964	30.8263	32.7254	51.6678	56.717	38.9866	42.3162	Up Regulated
ENSG00000074319	ENSG00000074319.13	TSG101	18468336	18526951	-1	mRNA	tumor susceptibility 101 [Source:HGNC Symbol;Acc:HGNC:15971]	796.807	0.169257	0.0590885	0.00120218	0.0209602	1451	779	762	778	886	885	1011	874	800.243	820.453	782.988	771.527	915.554	912.628	895.807	902.057	Up Regulated
ENSG00000275746	ENSG00000275746.1	KLF13	31478417	31529455	1	mRNA	Kruppel like factor 13 [Source:HGNC Symbol;Acc:HGNC:13672]	485.905	0.291253	0.116521	0.0012081	0.0210273	683	456	439	573	612	568	635	590	376.682	480.265	451.092	568.233	632.414	585.732	562.648	608.94	Up Regulated
ENSG00000134668	ENSG00000134668.12	SPOCD1	31790422	31816022	-1	mRNA	SPOC domain containing 1 [Source:HGNC Symbol;Acc:HGNC:26338]	3091.81	0.496704	0.225429	0.00121254	0.0210857	2557	3287	2410	5016	4910	4949	5124	4318	1410.21	3461.91	2476.38	4974.27	5073.78	5103.5	4540.17	4456.61	Up Regulated
ENSG00000012822	ENSG00000012822.16	CALCOCO1	53708517	53727745	-1	mRNA	calcium binding and coiled-coil domain 1 [Source:HGNC Symbol;Acc:HGNC:29306]	1058.03	0.346934	0.14531	0.00121394	0.0210857	1120	1142	926	1390	1367	1441	1510	1304	617.693	1202.77	951.505	1378.44	1412.6	1485.99	1337.95	1345.86	Up Regulated
ENSG00000135094	ENSG00000135094.11	SDS	113392445	113426301	-1	mRNA	serine dehydratase [Source:HGNC Symbol;Acc:HGNC:10691]	322.839	-0.538906	0.248116	0.00121457	0.0210857	1015	403	352	302	244	252	284	246	559.784	424.445	361.695	299.487	252.139	259.867	251.641	253.897	Down Regulated
ENSG00000178764	ENSG00000178764.8	ZHX2	122781655	122974510	1	mRNA	zinc fingers and homeoboxes 2 [Source:HGNC Symbol;Acc:HGNC:18513]	412.404	0.303322	0.122848	0.00121857	0.0211372	585	424	412	484	454	535	630	555	322.634	446.562	423.348	479.973	469.144	551.702	558.218	572.816	Up Regulated
ENSG00000104419	ENSG00000104419.14	NDRG1	133237175	133302022	-1	mRNA	N-myc downstream regulated 1 [Source:HGNC Symbol;Acc:HGNC:7679]	1589.6	0.257704	0.0999474	0.00122105	0.021162	1334	1086	1107	1470	1331	1355	1507	1369	735.716	1143.79	1137.49	1457.77	1375.4	1397.3	1335.29	1412.95	Up Regulated
ENSG00000182504	ENSG00000182504.11	CEP97	101724593	101770562	1	mRNA	centrosomal protein 97 [Source:HGNC Symbol;Acc:HGNC:26244]	552.664	-0.307688	0.12499	0.00122277	0.0211739	1013	656	778	471	458	454	565	476	558.681	690.908	799.429	467.081	473.277	468.173	500.624	491.28	Down Regulated
ENSG00000113296	ENSG00000113296.14	THBS4	79991311	80083287	1	mRNA	thrombospondin 4 [Source:HGNC Symbol;Acc:HGNC:11788]	84.8359	0.417261	0.184029	0.00122602	0.0211765	58	45	71	56	67	63	90	72	31.9876	47.3946	72.9556	55.5341	69.2349	64.9668	79.7454	74.3113	Up Regulated
ENSG00000274897	ENSG00000274897.3		NA	NA	NA	mRNA		22.9865	-0.701015	0.320784	0.00122634	0.0211765	48	24	23	16	8	15	15	12	26.4725	25.2771	23.6335	15.8669	8.26685	15.4683	13.2909	12.3852	Down Regulated
ENSG00000185480	ENSG00000185480.11	PARPBP	102120183	102197520	1	mRNA	PARP1 binding protein [Source:HGNC Symbol;Acc:HGNC:26074]	275.224	-0.317236	0.131703	0.00122709	0.0211765	485	273	364	241	231	194	255	214	267.483	287.527	374.026	238.995	238.705	200.056	225.945	220.87	Down Regulated
ENSG00000124207	ENSG00000124207.17	CSE1L	49046246	49096960	1	mRNA	chromosome segregation 1 like [Source:HGNC Symbol;Acc:HGNC:2431]	2382.93	-0.245193	0.0937841	0.00123101	0.0212234	5682	2565	2777	2176	2205	2028	2538	2182	3133.69	2701.49	2853.49	2157.9	2278.55	2091.31	2248.82	2252.05	Down Regulated
ENSG00000079616	ENSG00000079616.12	KIF22	29790727	29805385	1	mRNA	kinesin family member 22 [Source:HGNC Symbol;Acc:HGNC:6391]	940.899	-0.427198	0.188454	0.0012319	0.0212234	1688	1036	1288	754	666	665	754	743	930.951	1091.13	1323.48	747.727	688.215	685.76	668.089	766.852	Down Regulated
ENSG00000165178	ENSG00000165178.9	NCF1C	75156639	75172044	-1	mRNA	neutrophil cytosolic factor 1C pseudogene [Source:HGNC Symbol;Acc:HGNC:32523]	70.1964	0.745351	0.358682	0.00123946	0.0213355	38	17	18	24	34	38	54	37	20.9574	17.9046	18.4958	23.8003	35.1341	39.1863	47.8472	38.1878	Up Regulated
ENSG00000023330	ENSG00000023330.15	ALAS1	52198086	52214327	1	mRNA	5-aminolevulinate synthase 1 [Source:HGNC Symbol;Acc:HGNC:396]	6935.26	0.221458	0.0826245	0.00124116	0.0213466	12282	7636	6240	9157	8918	8919	10016	8712	6773.66	8042.33	6411.87	9080.81	9215.47	9197.44	8874.78	8991.67	Up Regulated
ENSG00000254331	ENSG00000254331.1	CKS1BP7	80644939	80645173	-1	mRNA	CDC28 protein kinase regulatory subunit 1B pseudogene 7 [Source:HGNC Symbol;Acc:HGNC:1999]	57.3046	-0.597564	0.280942	0.00124407	0.0213787	124	82	86	45	46	43	40	39	68.3874	86.3635	88.3688	44.6256	47.5344	44.3424	35.4424	40.252	Down Regulated
ENSG00000184226	ENSG00000184226.15	PCDH9	66302834	67230445	-1	mRNA	protocadherin 9 [Source:HGNC Symbol;Acc:HGNC:8661]	373.544	-0.560654	0.261242	0.0012477	0.0214229	604	252	315	156	167	130	214	150	333.113	265.41	323.676	154.702	172.571	134.058	189.617	154.815	Down Regulated
ENSG00000082996	ENSG00000082996.19	RNF13	149812770	149962139	1	mRNA	ring finger protein 13 [Source:HGNC Symbol;Acc:HGNC:10057]	2504.66	0.214394	0.0794738	0.00125498	0.0215116	4133	2768	2417	3127	3137	3053	3727	3018	2279.4	2915.29	2483.57	3100.98	3241.64	3148.31	3302.35	3114.88	Up Regulated
ENSG00000257586	ENSG00000257586.1		38994803	38996882	-1	mRNA	maltase-glucoamylase (alpha-glucosidase) (MGAM) pseudogene	11.5302	0.781247	0.385568	0.00125663	0.0215148	12	11	17	29	37	25	37	29	6.61813	11.5853	17.4682	28.7587	38.2342	25.7805	32.7842	29.9309	Up Regulated
ENSG00000046604	ENSG00000046604.13	DSG2	31498177	31549008	1	mRNA	desmoglein 2 [Source:HGNC Symbol;Acc:HGNC:3049]	182.166	-0.538598	0.248229	0.00125747	0.0215148	299	98	121	85	74	66	89	71	164.902	103.215	124.333	84.2928	76.4684	68.0604	78.8593	73.2792	Down Regulated
ENSG00000163736	ENSG00000163736.4	PPBP	73986439	73988190	-1	mRNA	pro-platelet basic protein [Source:HGNC Symbol;Acc:HGNC:9240]	10.7995	0.0386967	0.123342	0.00125922	0.0215148	0	0	0	0	2	3	2	3	0	0	0	0	2.06671	3.09365	1.77212	3.0963	Up Regulated
ENSG00000100122	ENSG00000100122.7	CRYBB1	26599278	26618027	-1	mRNA	crystallin beta B1 [Source:HGNC Symbol;Acc:HGNC:2397]	287.582	-0.567103	0.26581	0.00125941	0.0215148	685	388	354	216	199	200	249	180	377.785	408.647	363.75	214.203	205.638	206.244	220.629	185.778	Down Regulated
ENSG00000107263	ENSG00000107263.18	RAPGEF1	131576770	131740076	-1	mRNA	Rap guanine nucleotide exchange factor 1 [Source:HGNC Symbol;Acc:HGNC:4568]	7676.9	0.340445	0.142831	0.00126853	0.0216525	8950	5335	5037	8365	7779	8126	8644	7883	4936.03	5618.89	5175.74	8295.4	8038.48	8379.68	7659.1	8136.06	Up Regulated
ENSG00000261371	ENSG00000261371.6	PECAM1	64319415	64413776	-1	mRNA	platelet and endothelial cell adhesion molecule 1 [Source:HGNC Symbol;Acc:HGNC:8823]	6811.14	0.225802	0.0850326	0.00128025	0.0218341	9108	5921	6137	7294	7300	7280	8040	7392	5023.16	6236.07	6306.04	7233.31	7543.5	7507.27	7123.92	7629.3	Up Regulated
ENSG00000173418	ENSG00000173418.11	NAA20	20017310	20033655	1	mRNA	N-alpha-acetyltransferase 20, NatB catalytic subunit [Source:HGNC Symbol;Acc:HGNC:15908]	2015.53	0.247232	0.0954318	0.00128381	0.0218765	3116	2825	2310	3219	3180	2993	3592	2915	1718.51	2975.33	2373.63	3192.22	3286.07	3086.44	3182.73	3008.58	Up Regulated
ENSG00000168300	ENSG00000168300.14	PCMTD1	51817575	51899186	-1	mRNA	protein-L-isoaspartate (D-aspartate) O-methyltransferase domain containing 1 [Source:HGNC Symbol;Acc:HGNC:30483]	1306.9	0.266509	0.105096	0.001294	0.0219947	1858	1170	1190	1520	1573	1499	1746	1457	1024.71	1232.26	1222.78	1507.35	1625.47	1545.8	1547.06	1503.77	Up Regulated
ENSG00000254759	ENSG00000254759.1	NAP1L1P1	126067539	126068601	1	mRNA	nucleosome assembly protein 1 like 1 pseudogene 1 [Source:HGNC Symbol;Acc:HGNC:38004]	1362.38	0.246032	0.0949721	0.0012954	0.0220002	2056	1279	1378	1673	1649	1668	1875	1659	1133.91	1347.06	1415.96	1659.08	1704	1720.07	1661.36	1712.26	Up Regulated
ENSG00000175130	ENSG00000175130.7	MARCKSL1	32333839	32336233	-1	mRNA	MARCKS like 1 [Source:HGNC Symbol;Acc:HGNC:7142]	1086.72	0.281098	0.112612	0.00131219	0.0222106	1002	583	465	538	641	661	789	695	552.614	614.023	477.808	533.524	662.382	681.635	699.101	717.311	Up Regulated
ENSG00000131401	ENSG00000131401.11	NAPSB	50333796	50344773	-1	mRNA	napsin B aspartic peptidase, pseudogene [Source:HGNC Symbol;Acc:HGNC:13396]	465.058	-0.510393	0.236917	0.0013122	0.0222106	1134	723	766	489	415	376	465	438	625.414	761.473	787.098	484.932	428.843	387.738	412.018	452.061	Down Regulated
ENSG00000110660	ENSG00000110660.15	SLC35F2	107790991	107928293	-1	mRNA	solute carrier family 35 member F2 [Source:HGNC Symbol;Acc:HGNC:23615]	876.787	-0.222278	0.0835756	0.00131346	0.0222106	2673	1328	1245	1006	1080	1049	1228	988	1474.19	1398.67	1279.29	997.63	1116.03	1081.75	1088.08	1019.72	Down Regulated
ENSG00000136169	ENSG00000136169.16	SETDB2	49444274	49495003	1	mRNA	SET domain bifurcated histone lysine methyltransferase 2 [Source:HGNC Symbol;Acc:HGNC:20263]	3073.35	0.194516	0.0708153	0.00131401	0.0222106	5385	3089	3172	4165	4021	3794	4401	3802	2969.89	3253.37	3259.37	4130.35	4155.13	3912.44	3899.55	3924.05	Up Regulated
ENSG00000168077	ENSG00000168077.14	SCARA3	27633868	27676776	1	mRNA	scavenger receptor class A member 3 [Source:HGNC Symbol;Acc:HGNC:19000]	15.2595	-1.11703	0.527497	0.00131435	0.0222106	23	12	10	11	4	8	3	2	12.6848	12.6386	10.2754	10.9085	4.13343	8.24975	2.65818	2.0642	Down Regulated
ENSG00000166788	ENSG00000166788.10	SAAL1	18069935	18106087	-1	mRNA	serum amyloid A like 1 [Source:HGNC Symbol;Acc:HGNC:25158]	218.603	-0.254027	0.0988867	0.00131886	0.0222636	553	228	308	259	231	199	248	240	304.986	240.133	316.483	256.845	238.705	205.212	219.743	247.704	Down Regulated
ENSG00000077935	ENSG00000077935.17	SMC1B	45344063	45413619	-1	mRNA	structural maintenance of chromosomes 1B [Source:HGNC Symbol;Acc:HGNC:11112]	184.705	-0.314362	0.129801	0.00131968	0.0222636	325	144	228	162	133	118	152	156	179.241	151.663	234.28	160.652	137.436	121.684	134.681	161.008	Down Regulated
ENSG00000143353	ENSG00000143353.12	LYPLAL1	219173869	219212865	1	mRNA	lysophospholipase like 1 [Source:HGNC Symbol;Acc:HGNC:20440]	1699.41	0.243709	0.094177	0.00133393	0.0224854	3374	1929	1781	2484	2551	2363	2856	2329	1860.8	2031.65	1830.06	2463.33	2636.09	2436.77	2530.59	2403.76	Up Regulated
ENSG00000166004	ENSG00000166004.15	CEP295	93661682	93730358	1	mRNA	centrosomal protein 295 [Source:HGNC Symbol;Acc:HGNC:29366]	1644.01	-0.235933	0.0904094	0.00133773	0.0225306	3373	1685	2143	1647	1557	1494	1614	1526	1860.25	1774.66	2202.03	1633.3	1608.94	1540.64	1430.1	1574.99	Down Regulated
ENSG00000147488	ENSG00000147488.11	ST18	52110838	52460959	-1	mRNA	ST18 C2H2C-type zinc finger transcription factor [Source:HGNC Symbol;Acc:HGNC:18695]	97.7237	-0.542296	0.252338	0.00133919	0.0225366	277	71	61	86	52	56	76	54	152.769	74.7781	62.6802	85.2845	53.7345	57.7482	67.3406	55.7335	Down Regulated
ENSG00000113327	ENSG00000113327.16	GABRG2	162000057	162162977	1	mRNA	gamma-aminobutyric acid type A receptor subunit gamma2 [Source:HGNC Symbol;Acc:HGNC:4087]	182.468	0.335384	0.141797	0.00135122	0.0227201	409	241	258	330	350	329	406	354	225.568	253.824	265.106	327.254	361.675	339.271	359.74	365.364	Up Regulated
ENSG00000198855	ENSG00000198855.7	FICD	108515277	108525837	1	mRNA	FIC domain protein adenylyltransferase [Source:HGNC Symbol;Acc:HGNC:18416]	296.101	-0.247676	0.0961779	0.00136798	0.022983	555	262	257	254	217	227	274	192	306.089	275.942	264.079	251.887	224.238	234.087	242.78	198.164	Down Regulated
ENSG00000138376	ENSG00000138376.11	BARD1	214725646	214809683	-1	mRNA	BRCA1 associated RING domain 1 [Source:HGNC Symbol;Acc:HGNC:952]	1704.75	-0.262259	0.103801	0.00137137	0.0230208	3689	1846	2457	1662	1564	1469	1835	1735	2034.52	1944.23	2524.67	1648.17	1616.17	1514.86	1625.92	1790.7	Down Regulated
ENSG00000059588	ENSG00000059588.10	TARBP1	234391313	234479179	-1	mRNA	TAR (HIV-1) RNA binding protein 1 [Source:HGNC Symbol;Acc:HGNC:11568]	1626.32	0.30947	0.128408	0.00138549	0.0231858	2329	947	844	1504	1514	1434	1745	1419	1284.47	997.393	867.247	1491.49	1564.5	1478.77	1546.17	1464.55	Up Regulated
ENSG00000029534	ENSG00000029534.20	ANK1	41653220	41896762	-1	mRNA	ankyrin 1 [Source:HGNC Symbol;Acc:HGNC:492]	78.954	0.470253	0.217088	0.00138576	0.0231858	77	82	72	112	137	85	139	112	42.4664	86.3635	73.9831	111.068	141.57	87.6536	123.162	115.595	Up Regulated
ENSG00000147650	ENSG00000147650.11	LRP12	104489231	104589258	-1	mRNA	LDL receptor related protein 12 [Source:HGNC Symbol;Acc:HGNC:31708]	1862.24	0.320564	0.134389	0.00138799	0.023204	2157	983	996	1462	1508	1564	1745	1428	1189.61	1035.31	1023.43	1449.84	1558.3	1612.83	1546.17	1473.84	Up Regulated
ENSG00000163607	ENSG00000163607.15	GTPBP8	112990984	113015060	1	mRNA	GTP binding protein 8 (putative) [Source:HGNC Symbol;Acc:HGNC:25007]	219.209	-0.255464	0.102237	0.00138972	0.0232138	507	251	259	292	218	192	254	231	279.616	264.356	266.134	289.571	225.272	197.994	225.059	238.415	Down Regulated
ENSG00000183814	ENSG00000183814.15	LIN9	226231149	226309869	-1	mRNA	lin-9 DREAM MuvB core complex component [Source:HGNC Symbol;Acc:HGNC:30830]	493.245	-0.279848	0.112988	0.00139297	0.0232489	1117	584	625	487	464	392	541	483	616.038	615.076	642.215	482.948	479.477	404.238	479.359	498.505	Down Regulated
ENSG00000023909	ENSG00000023909.10	GCLM	93885199	93909456	-1	mRNA	glutamate-cysteine ligase modifier subunit [Source:HGNC Symbol;Acc:HGNC:4312]	853.005	0.273198	0.109666	0.00140397	0.0234133	1480	587	608	851	923	821	990	955	816.237	618.236	624.747	843.92	953.788	846.63	877.2	985.657	Up Regulated
ENSG00000183762	ENSG00000183762.12	KREMEN1	29073035	29168333	1	mRNA	kringle containing transmembrane protein 1 [Source:HGNC Symbol;Acc:HGNC:17550]	614.494	0.359915	0.156256	0.00140964	0.0234887	701	436	370	677	597	650	713	653	386.609	459.201	380.191	671.367	616.914	670.292	631.761	673.962	Up Regulated
ENSG00000179833	ENSG00000179833.4	SERTAD2	64631621	64751005	-1	mRNA	SERTA domain containing 2 [Source:HGNC Symbol;Acc:HGNC:30784]	1844.13	0.25171	0.0990629	0.00141094	0.0234907	1360	1004	1010	1183	1227	1244	1331	1172	750.055	1057.43	1037.82	1173.16	1267.93	1282.84	1179.35	1209.62	Up Regulated
ENSG00000148488	ENSG00000148488.17	ST8SIA6	17315421	17454595	-1	mRNA	ST8 alpha-N-acetyl-neuraminide alpha-2,8-sialyltransferase 6 [Source:HGNC Symbol;Acc:HGNC:23317]	6.29651	-2.79213	1.08492	0.00141208	0.0234907	17	4	8	0	0	0	2	0	9.37569	4.21285	8.22035	0	0	0	1.77212	0	Down Regulated
ENSG00000157388	ENSG00000157388.17	CACNA1D	53328963	53813733	1	mRNA	calcium voltage-gated channel subunit alpha1 D [Source:HGNC Symbol;Acc:HGNC:1391]	111.573	-0.408803	0.181622	0.00141895	0.0235857	288	92	108	79	74	64	85	96	158.835	96.8956	110.975	78.3427	76.4684	65.998	75.3151	99.0818	Down Regulated
ENSG00000155749	ENSG00000155749.12	FLACC1	201288271	201357398	-1	mRNA	flagellum associated containing coiled-coil domains 1 [Source:HGNC Symbol;Acc:HGNC:14439]	89.8563	-0.432819	0.186296	0.00142114	0.0235935	148	85	78	82	60	53	57	61	81.6237	89.5231	80.1484	81.3178	62.0014	54.6546	50.5054	62.9582	Down Regulated
ENSG00000171467	ENSG00000171467.16	ZNF318	43307134	43369647	-1	mRNA	zinc finger protein 318 [Source:HGNC Symbol;Acc:HGNC:13578]	2121.14	0.203729	0.0758021	0.00142358	0.0235935	2683	1521	1597	1750	1784	1924	2069	1884	1479.7	1601.94	1640.99	1735.44	1843.51	1984.06	1833.26	1944.48	Up Regulated
ENSG00000203965	ENSG00000203965.13	EFCAB7	63523372	63572693	1	mRNA	EF-hand calcium binding domain 7 [Source:HGNC Symbol;Acc:HGNC:29379]	116.772	-0.391426	0.171022	0.00142494	0.0235935	367	136	163	85	123	94	134	84	202.405	143.237	167.49	84.2928	127.103	96.9345	118.732	86.6965	Down Regulated
ENSG00000152952	ENSG00000152952.12	PLOD2	146069440	146163653	-1	mRNA	procollagen-lysine,2-oxoglutarate 5-dioxygenase 2 [Source:HGNC Symbol;Acc:HGNC:9082]	93.227	-0.423642	0.191255	0.00142495	0.0235935	270	120	155	91	88	83	91	102	148.908	126.386	159.269	90.2429	90.9354	85.5911	80.6315	105.274	Down Regulated
ENSG00000181472	ENSG00000181472.5	ZBTB2	151364115	151391559	-1	mRNA	zinc finger and BTB domain containing 2 [Source:HGNC Symbol;Acc:HGNC:20868]	806.276	-0.189955	0.0694097	0.00142523	0.0235935	1536	815	768	749	692	652	790	677	847.121	858.369	789.154	742.768	715.083	672.354	699.987	698.733	Down Regulated
ENSG00000151849	ENSG00000151849.15	CENPJ	24882279	24922889	-1	mRNA	centromere protein J [Source:HGNC Symbol;Acc:HGNC:17272]	796.694	-0.262648	0.103999	0.00142805	0.0235936	1725	800	994	785	732	660	828	697	951.357	842.57	1021.38	778.469	756.417	680.604	733.658	719.375	Down Regulated
ENSG00000166503	ENSG00000166503.9	HDGFL3	83112738	83207823	-1	mRNA	HDGF like 3 [Source:HGNC Symbol;Acc:HGNC:24937]	474.805	-0.453653	0.208992	0.00142872	0.0235936	1555	621	804	487	476	435	515	470	857.6	654.045	826.145	482.948	491.878	448.58	456.321	485.088	Down Regulated
ENSG00000069974	ENSG00000069974.16	RAB27A	55202966	55319113	-1	mRNA	RAB27A, member RAS oncogene family [Source:HGNC Symbol;Acc:HGNC:9766]	1091.47	-0.270721	0.108752	0.00143192	0.0236273	1754	787	979	696	687	657	765	698	967.351	828.879	1005.97	690.209	709.916	677.51	677.836	720.407	Down Regulated
ENSG00000095383	ENSG00000095383.20	TBC1D2	98199011	98255649	-1	mRNA	TBC1 domain family member 2 [Source:HGNC Symbol;Acc:HGNC:18026]	710.515	0.378164	0.166872	0.00143566	0.0236697	1073	663	714	1142	994	1026	1314	1109	591.772	698.28	733.666	1132.5	1027.16	1058.03	1164.28	1144.6	Up Regulated
ENSG00000158201	ENSG00000158201.10	ABHD3	21650901	21704780	-1	mRNA	abhydrolase domain containing 3, phospholipase [Source:HGNC Symbol;Acc:HGNC:18718]	927.095	-0.197534	0.0729662	0.00143811	0.0236777	2128	1004	1141	1026	959	895	1021	931	1173.62	1057.43	1172.43	1017.46	990.989	922.94	904.667	960.887	Down Regulated
ENSG00000108515	ENSG00000108515.17	ENO3	4948092	4957131	1	mRNA	enolase 3 [Source:HGNC Symbol;Acc:HGNC:3354]	63.8594	-0.449826	0.204083	0.00143848	0.0236777	180	61	62	60	43	47	62	47	99.272	64.246	63.7077	59.5008	44.4343	48.4673	54.9357	48.5088	Down Regulated
ENSG00000112308	ENSG00000112308.13	C6orf62	24704861	24719998	-1	mRNA	chromosome 6 open reading frame 62 [Source:HGNC Symbol;Acc:HGNC:20998]	3863.4	0.189802	0.0695252	0.0014459	0.0237615	5903	3622	3427	4084	4364	4083	4719	3998	3255.57	3814.74	3521.39	4050.02	4509.57	4210.46	4181.32	4126.34	Up Regulated
ENSG00000173852	ENSG00000173852.14	DPY19L1	34927292	35038271	-1	mRNA	dpy-19 like C-mannosyltransferase 1 [Source:HGNC Symbol;Acc:HGNC:22205]	652.744	-0.250582	0.098773	0.00145566	0.0239025	1532	777	840	653	633	636	706	624	844.915	818.346	863.137	647.567	654.115	655.855	625.558	644.031	Down Regulated
ENSG00000150347	ENSG00000150347.16	ARID5B	61901684	62096944	1	mRNA	AT-rich interaction domain 5B [Source:HGNC Symbol;Acc:HGNC:17362]	2462.25	0.274118	0.111054	0.00146175	0.0239831	2091	2219	2135	2431	2436	2686	2744	2385	1153.21	2337.08	2193.81	2410.77	2517.26	2769.85	2431.35	2461.56	Up Regulated
ENSG00000198842	ENSG00000198842.9	STYXL2	167094075	167129165	1	mRNA	serine/threonine/tyrosine interacting like 2 [Source:HGNC Symbol;Acc:HGNC:25034]	104.753	-0.502337	0.237582	0.00146435	0.0240064	342	170	181	100	100	108	98	111	188.617	179.046	185.985	99.168	103.336	111.372	86.8339	114.563	Down Regulated
ENSG00000112406	ENSG00000112406.5	HECA	139135080	139180802	1	mRNA	hdc homolog, cell cycle regulator [Source:HGNC Symbol;Acc:HGNC:21041]	6384.81	0.217825	0.0827846	0.00146792	0.024036	8541	5555	5591	6191	6633	6518	7556	6326	4710.46	5850.6	5745	6139.49	6854.25	6721.48	6695.07	6529.07	Up Regulated
ENSG00000225345	ENSG00000225345.3	SNX18P3	38566260	38568211	-1	mRNA	sorting nexin 18 pseudogene 3 [Source:HGNC Symbol;Acc:HGNC:39611]	184.303	-0.687514	0.33635	0.00146852	0.024036	100	24	40	33	24	22	29	10	55.1511	25.2771	41.1017	32.7254	24.8006	22.6868	25.6957	10.321	Down Regulated
ENSG00000136286	ENSG00000136286.16	MYO1G	44962662	44979088	-1	mRNA	myosin IG [Source:HGNC Symbol;Acc:HGNC:13880]	147.829	0.595164	0.29289	0.00147797	0.0241711	165	94	97	184	234	182	215	187	90.9993	99.002	99.6717	182.469	241.805	187.682	190.503	193.003	Up Regulated
ENSG00000265828	ENSG00000265828.1	MIR3939	166997807	166997912	-1	mRNA	microRNA 3939 [Source:HGNC Symbol;Acc:HGNC:38931]	35.2243	-0.588785	0.282362	0.00148488	0.0242646	68	28	45	18	28	19	17	14	37.5028	29.49	46.2395	17.8502	28.934	19.5931	15.063	14.4494	Down Regulated
ENSG00000196205	ENSG00000196205.8	EEF1A1P5	133019486	133020874	1	mRNA	eukaryotic translation elongation factor 1 alpha 1 pseudogene 5 [Source:HGNC Symbol;Acc:HGNC:3200]	91569.6	0.203122	0.0759257	0.00148791	0.0242946	206094	144303	134610	161375	159996	164566	182524	162593	113663	151982	138318	160032	165333	169703	161727	167813	Up Regulated
ENSG00000114120	ENSG00000114120.12	SLC25A36	140941830	140980995	1	mRNA	solute carrier family 25 member 36 [Source:HGNC Symbol;Acc:HGNC:25554]	2174.9	0.226133	0.087003	0.00149326	0.0243602	4180	2180	2088	2845	2952	2632	3309	2735	2305.32	2296	2145.51	2821.33	3050.47	2714.17	2931.97	2822.8	Up Regulated
ENSG00000165449	ENSG00000165449.11	SLC16A9	59650764	59736002	-1	mRNA	solute carrier family 16 member 9 [Source:HGNC Symbol;Acc:HGNC:23520]	92.9488	-0.451942	0.197244	0.00149433	0.0243602	122	53	54	34	30	30	47	42	67.2844	55.8203	55.4874	33.7171	31.0007	30.9365	41.6448	43.3483	Down Regulated
ENSG00000162849	ENSG00000162849.16	KIF26B	245154985	245709432	1	mRNA	kinesin family member 26B [Source:HGNC Symbol;Acc:HGNC:25484]	44.6275	-0.895621	0.443811	0.00151129	0.024617	76	7	17	21	4	11	18	8	41.9149	7.37249	17.4682	20.8253	4.13343	11.3434	15.9491	8.25681	Down Regulated
ENSG00000159189	ENSG00000159189.12	C1QC	22643014	22648110	1	mRNA	complement C1q C chain [Source:HGNC Symbol;Acc:HGNC:1245]	15.6807	-2.50773	1.06592	0.00151613	0.0246759	30	6	3	0	0	0	2	1	16.5453	6.31928	3.08263	0	0	0	1.77212	1.0321	Down Regulated
ENSG00000203914	ENSG00000203914.4	HSP90B3P	91642516	91644082	1	mRNA	heat shock protein 90 beta family member 3, pseudogene [Source:HGNC Symbol;Acc:HGNC:12100]	527.919	-0.303446	0.126765	0.0015191	0.0247045	1353	396	457	422	372	369	476	395	746.195	417.072	469.587	418.489	384.409	380.52	421.765	407.68	Down Regulated
ENSG00000182534	ENSG00000182534.13	MXRA7	76672551	76711004	-1	mRNA	matrix remodeling associated 7 [Source:HGNC Symbol;Acc:HGNC:7541]	388.988	0.224003	0.0880513	0.00152686	0.0248108	653	397	370	473	483	463	555	470	360.137	418.126	380.191	469.065	499.111	477.454	491.763	485.088	Up Regulated
ENSG00000186184	ENSG00000186184.17	POLR1D	27620742	27744237	1	mRNA	RNA polymerase I and III subunit D [Source:HGNC Symbol;Acc:HGNC:20422]	1648	0.130164	0.0449769	0.0015293	0.0248306	3162	1721	1635	1867	1934	1810	2263	1896	1743.88	1812.58	1680.03	1851.47	1998.51	1866.51	2005.15	1956.86	Up Regulated
ENSG00000133874	ENSG00000133874.2	RNF122	33547754	33567128	-1	mRNA	ring finger protein 122 [Source:HGNC Symbol;Acc:HGNC:21147]	214.102	0.309672	0.131365	0.0015317	0.0248442	258	220	197	243	264	239	299	261	142.29	231.707	202.426	240.978	272.806	246.461	264.932	269.379	Up Regulated
ENSG00000104814	ENSG00000104814.13	MAP4K1	38587641	38618882	-1	mRNA	mitogen-activated protein kinase kinase kinase kinase 1 [Source:HGNC Symbol;Acc:HGNC:6863]	26.3762	-0.597748	0.293082	0.00153333	0.0248442	78	45	44	37	21	17	23	39	43.0179	47.3946	45.2119	36.6922	21.7005	17.5307	20.3794	40.252	Down Regulated
ENSG00000035681	ENSG00000035681.9	NSMAF	58583508	58659853	-1	mRNA	neutral sphingomyelinase activation associated factor [Source:HGNC Symbol;Acc:HGNC:8017]	4621.53	0.176978	0.064288	0.00154709	0.0249996	7703	3527	3761	4870	4700	4538	5514	4600	4248.29	3714.68	3864.59	4829.48	4856.78	4679.67	4885.74	4747.67	Up Regulated
ENSG00000153714	ENSG00000153714.6	LURAP1L	12775020	12823060	1	mRNA	leucine rich adaptor protein 1 like [Source:HGNC Symbol;Acc:HGNC:31452]	117.626	-0.388478	0.173078	0.00155359	0.0250847	221	72	77	83	68	59	80	57	121.884	75.8313	79.1209	82.3094	70.2682	60.8419	70.8848	58.8298	Down Regulated
ENSG00000163788	ENSG00000163788.14	SNRK	43286512	43424764	1	mRNA	SNF related kinase [Source:HGNC Symbol;Acc:HGNC:30598]	1391.14	0.198605	0.07428	0.0015551	0.0250874	2144	1195	1211	1526	1478	1470	1746	1456	1182.44	1258.59	1244.36	1513.3	1527.3	1515.89	1547.06	1502.74	Up Regulated
ENSG00000153904	ENSG00000153904.20	DDAH1	85318481	85578363	-1	mRNA	dimethylarginine dimethylaminohydrolase 1 [Source:HGNC Symbol;Acc:HGNC:2715]	222.734	-0.287837	0.118996	0.00155623	0.0250874	491	198	260	221	206	178	217	166	270.792	208.536	267.161	219.161	212.871	183.557	192.275	171.329	Down Regulated
ENSG00000198805	ENSG00000198805.11	PNP	20468954	20477089	1	mRNA	purine nucleoside phosphorylase [Source:HGNC Symbol;Acc:HGNC:7892]	3180.39	-0.263522	0.106608	0.00156554	0.0251975	6232	3912	3424	2642	2619	2721	3243	2504	3437.02	4120.17	3518.31	2620.02	2706.36	2805.94	2873.49	2584.38	Down Regulated
ENSG00000157214	ENSG00000157214.14	STEAP2	90167590	90238137	1	mRNA	STEAP2 metalloreductase [Source:HGNC Symbol;Acc:HGNC:17885]	23.1694	-0.611923	0.297067	0.00156948	0.0252409	81	19	36	24	13	17	24	21	44.6724	20.011	36.9916	23.8003	13.4336	17.5307	21.2654	21.6741	Down Regulated
ENSG00000155755	ENSG00000155755.19	TMEM237	201620184	201643570	-1	mRNA	transmembrane protein 237 [Source:HGNC Symbol;Acc:HGNC:14432]	186.345	-0.338794	0.147103	0.00158366	0.0254133	440	220	204	149	147	123	208	153	242.665	231.707	209.619	147.76	151.903	126.84	184.301	157.912	Down Regulated
ENSG00000075420	ENSG00000075420.13	FNDC3B	172039578	172401669	1	mRNA	fibronectin type III domain containing 3B [Source:HGNC Symbol;Acc:HGNC:24670]	13424.2	0.191236	0.0709923	0.001584	0.0254133	18724	11034	10108	13219	13251	13014	14996	12179	10326.5	11621.2	10386.4	13109	13693	13420.3	13287.4	12570	Up Regulated
ENSG00000144115	ENSG00000144115.16	THNSL2	88170295	88186636	1	mRNA	threonine synthase like 2 [Source:HGNC Symbol;Acc:HGNC:25602]	100.616	0.420158	0.194128	0.00158425	0.0254133	146	74	70	115	135	108	150	113	80.5206	77.9378	71.9281	114.043	139.503	111.372	132.909	116.627	Up Regulated
ENSG00000052802	ENSG00000052802.13	MSMO1	165327667	165343164	1	mRNA	methylsterol monooxygenase 1 [Source:HGNC Symbol;Acc:HGNC:10545]	2832.4	0.322429	0.138688	0.0015852	0.0254133	2977	2877	2532	3441	3498	3501	3832	3391	1641.85	3030.09	2601.74	3412.37	3614.68	3610.3	3395.38	3499.86	Up Regulated
ENSG00000164035	ENSG00000164035.10	EMCN	100395341	100880126	-1	mRNA	endomucin [Source:HGNC Symbol;Acc:HGNC:16041]	27.5044	0.613571	0.312077	0.00158726	0.0254261	24	49	34	45	70	65	81	34	13.2363	51.6074	34.9365	44.6256	72.335	67.0292	71.7709	35.0915	Up Regulated
ENSG00000079462	ENSG00000079462.7	PAFAH1B3	42297033	42303546	-1	mRNA	platelet activating factor acetylhydrolase 1b catalytic subunit 3 [Source:HGNC Symbol;Acc:HGNC:8576]	134.348	-0.482744	0.230731	0.00159054	0.0254587	252	153	143	119	79	92	107	90	138.981	161.142	146.939	118.01	81.6352	94.8721	94.8084	92.8891	Down Regulated
ENSG00000122877	ENSG00000122877.16	EGR2	62811996	62819167	-1	mRNA	early growth response 2 [Source:HGNC Symbol;Acc:HGNC:3239]	1256.08	0.480704	0.230477	0.00159446	0.0255006	483	845	606	1380	1326	1214	1293	1057	266.38	889.965	622.691	1368.52	1370.23	1251.9	1145.68	1090.93	Up Regulated
ENSG00000115165	ENSG00000115165.10	CYTIP	157414619	157488961	-1	mRNA	cytohesin 1 interacting protein [Source:HGNC Symbol;Acc:HGNC:9506]	1737.89	0.239941	0.0947648	0.00159576	0.0255006	3651	1932	1933	2502	2530	2603	2816	2519	2013.57	2034.81	1986.24	2481.18	2614.39	2684.26	2495.15	2599.86	Up Regulated
ENSG00000146592	ENSG00000146592.17	CREB5	28299321	28825894	1	mRNA	cAMP responsive element binding protein 5 [Source:HGNC Symbol;Acc:HGNC:16844]	138.419	-0.547508	0.268488	0.00159693	0.0255006	240	92	172	42	66	68	73	67	132.363	96.8956	176.738	41.6506	68.2015	70.1228	64.6824	69.1508	Down Regulated
ENSG00000141543	ENSG00000141543.11	EIF4A3	80134369	80147151	-1	mRNA	eukaryotic translation initiation factor 4A3 [Source:HGNC Symbol;Acc:HGNC:18683]	1169.52	-0.201596	0.0758369	0.00160048	0.0255171	2639	1088	1138	997	973	979	1155	991	1455.44	1145.9	1169.34	988.705	1005.46	1009.56	1023.4	1022.81	Down Regulated
ENSG00000112144	ENSG00000112144.15	CILK1	53001279	53061824	-1	mRNA	ciliogenesis associated kinase 1 [Source:HGNC Symbol;Acc:HGNC:21219]	572.974	0.187493	0.0695047	0.00160445	0.0255605	842	524	544	608	624	620	697	592	464.372	551.884	558.984	602.941	644.814	639.355	617.584	611.004	Up Regulated
ENSG00000031691	ENSG00000031691.7	CENPQ	49463370	49493107	1	mRNA	centromere protein Q [Source:HGNC Symbol;Acc:HGNC:21347]	365.423	-0.33174	0.144192	0.00161055	0.0256175	981	532	651	388	400	355	479	397	541.032	560.309	668.931	384.772	413.343	366.082	424.423	409.744	Down Regulated
ENSG00000224546	ENSG00000224546.2	EIF4BP3	96146007	96147856	1	mRNA	eukaryotic translation initiation factor 4B pseudogene 3 [Source:HGNC Symbol;Acc:HGNC:37936]	1316.36	0.206212	0.0782791	0.00161388	0.0256503	2948	1889	1754	2174	2119	2223	2320	2331	1625.86	1989.52	1802.31	2155.91	2189.68	2292.4	2055.66	2405.83	Up Regulated
ENSG00000185920	ENSG00000185920.15	PTCH1	95442980	95517057	-1	mRNA	patched 1 [Source:HGNC Symbol;Acc:HGNC:9585]	308.098	0.296027	0.121717	0.00163182	0.0258748	380	208	193	244	282	283	250	301	209.574	219.068	198.316	241.97	291.407	291.835	221.515	310.663	Up Regulated
ENSG00000087266	ENSG00000087266.16	SH3BP2	2793071	2841098	1	mRNA	SH3 domain binding protein 2 [Source:HGNC Symbol;Acc:HGNC:10825]	5087.89	0.363222	0.162547	0.0016334	0.0258796	5324	4407	3531	5588	5729	5804	6380	5338	2936.25	4641.51	3628.26	5541.51	5920.1	5985.19	5653.06	5509.36	Up Regulated
ENSG00000166402	ENSG00000166402.8	TUB	8019244	8106243	1	mRNA	TUB bipartite transcription factor [Source:HGNC Symbol;Acc:HGNC:12406]	26.5098	-0.800322	0.400933	0.0016385	0.0259402	46	11	29	10	6	9	16	7	25.3695	11.5853	29.7988	9.9168	6.20014	9.28096	14.177	7.22471	Down Regulated
ENSG00000254469	ENSG00000254469.7	XNDC1N	71865504	71928654	-1	mRNA	XRCC1 N-terminal domain containing 1, N-terminal like [Source:HGNC Symbol;Acc:HGNC:54661]	123.114	-0.347538	0.151192	0.00164055	0.0259524	243	130	157	91	108	81	108	93	134.017	136.918	161.324	90.2429	111.603	83.5287	95.6945	95.9855	Down Regulated
ENSG00000225017	ENSG00000225017.1		99346052	99348256	-1	mRNA	aconitase 2, mitochondrial (ACO2) pseudogene	75.4907	-0.556783	0.262341	0.00164393	0.0259856	79	36	57	41	21	32	35	23	43.5694	37.9157	58.57	40.6589	21.7005	32.999	31.0121	23.7383	Down Regulated
ENSG00000144476	ENSG00000144476.6	ACKR3	236567787	236582354	1	mRNA	atypical chemokine receptor 3 [Source:HGNC Symbol;Acc:HGNC:23692]	347.696	0.582833	0.293843	0.00165636	0.0261618	467	271	207	481	493	612	546	473	257.556	285.421	212.702	476.998	509.445	631.106	483.789	488.184	Up Regulated
ENSG00000013583	ENSG00000013583.10	HEBP1	12974870	13000265	-1	mRNA	heme binding protein 1 [Source:HGNC Symbol;Acc:HGNC:17176]	212.115	0.303283	0.135875	0.00165956	0.0261919	210	112	112	174	165	162	190	170	115.817	117.96	115.085	172.552	170.504	167.057	168.351	175.457	Up Regulated
ENSG00000119403	ENSG00000119403.15	PHF19	120855651	120894896	-1	mRNA	PHD finger protein 19 [Source:HGNC Symbol;Acc:HGNC:24566]	993.395	-0.358374	0.160331	0.00166212	0.0262119	1603	1074	1160	679	691	677	790	693	884.072	1131.15	1191.95	673.351	714.049	698.135	699.987	715.246	Down Regulated
ENSG00000147162	ENSG00000147162.14	OGT	71533104	71575892	1	mRNA	O-linked N-acetylglucosamine (GlcNAc) transferase [Source:HGNC Symbol;Acc:HGNC:8127]	10976.4	0.156672	0.0559234	0.00166343	0.0262123	15236	9375	9418	11715	11581	11106	11983	10324	8402.82	9873.87	9677.41	11617.5	11967.3	11452.7	10617.7	10655.4	Up Regulated
ENSG00000197258	ENSG00000197258.5	EIF4BP6	104667749	104669576	1	mRNA	eukaryotic translation initiation factor 4B pseudogene 6 [Source:HGNC Symbol;Acc:HGNC:37939]	2691.29	0.204854	0.0780001	0.0016746	0.0263679	5778	3734	3617	4495	4322	4538	4937	4388	3186.63	3932.7	3716.63	4457.6	4466.17	4679.67	4374.48	4528.86	Up Regulated
ENSG00000137817	ENSG00000137817.17	PARP6	72241181	72272999	-1	mRNA	poly(ADP-ribose) polymerase family member 6 [Source:HGNC Symbol;Acc:HGNC:26921]	1011.26	0.164086	0.0592097	0.00168462	0.026505	1840	836	904	1135	1149	1126	1189	1067	1014.78	880.486	928.899	1125.56	1187.33	1161.15	1053.53	1101.25	Up Regulated
ENSG00000058091	ENSG00000058091.17	CDK14	90466424	91210590	1	mRNA	cyclin dependent kinase 14 [Source:HGNC Symbol;Acc:HGNC:8883]	673.358	-0.262092	0.102585	0.00170055	0.026735	1186	673	704	538	469	492	633	546	654.092	708.812	723.391	533.524	484.644	507.359	560.876	563.527	Down Regulated
ENSG00000156958	ENSG00000156958.15	GALK2	49155656	49367869	1	mRNA	galactokinase 2 [Source:HGNC Symbol;Acc:HGNC:4119]	744.64	-0.172016	0.0628233	0.00171061	0.0268629	1363	702	697	642	650	588	673	597	751.71	739.355	716.198	636.659	671.682	606.356	596.318	616.165	Down Regulated
ENSG00000106004	ENSG00000106004.5	HOXA5	27141052	27143681	-1	mRNA	homeobox A5 [Source:HGNC Symbol;Acc:HGNC:5106]	98.9393	0.433718	0.207077	0.00171133	0.0268629	106	124	117	225	170	188	224	202	58.4602	130.598	120.223	223.128	175.671	193.869	198.477	208.485	Up Regulated
ENSG00000104356	ENSG00000104356.11	POP1	98117293	98159835	1	mRNA	POP1 homolog, ribonuclease P/MRP subunit [Source:HGNC Symbol;Acc:HGNC:30129]	1312.81	-0.172635	0.0631658	0.00171947	0.0269697	2811	1456	1421	1347	1269	1213	1406	1287	1550.3	1533.48	1460.14	1335.79	1311.33	1250.87	1245.8	1328.31	Down Regulated
ENSG00000133059	ENSG00000133059.17	DSTYK	205142505	205211702	-1	mRNA	dual serine/threonine and tyrosine protein kinase [Source:HGNC Symbol;Acc:HGNC:29043]	693.691	0.195281	0.0727811	0.00172777	0.027079	1113	613	728	730	728	772	906	803	613.832	645.62	748.052	723.926	752.284	796.101	802.77	828.778	Up Regulated
ENSG00000137509	ENSG00000137509.11	PRCP	82822936	82970584	-1	mRNA	prolylcarboxypeptidase [Source:HGNC Symbol;Acc:HGNC:9344]	1300.9	0.198071	0.0776187	0.00173332	0.0271451	2192	1642	1644	1843	1819	1830	2220	1799	1208.91	1729.38	1689.28	1827.67	1879.68	1887.13	1967.05	1856.75	Up Regulated
ENSG00000125148	ENSG00000125148.7	MT2A	56608584	56609497	1	mRNA	metallothionein 2A [Source:HGNC Symbol;Acc:HGNC:7406]	193.221	-0.78201	0.410294	0.00173562	0.0271602	43	33	42	11	10	10	18	16	23.715	34.756	43.1568	10.9085	10.3336	10.3122	15.9491	16.5136	Down Regulated
ENSG00000232901	ENSG00000232901.1	CYCSP10	10000647	10000940	-1	mRNA	CYCS pseudogene 10 [Source:HGNC Symbol;Acc:HGNC:24384]	28.4808	-0.578723	0.280246	0.00174098	0.0272228	67	23	34	27	18	17	26	14	36.9513	24.2239	34.9365	26.7754	18.6004	17.5307	23.0376	14.4494	Down Regulated
ENSG00000065150	ENSG00000065150.19	IPO5	97953658	98024296	1	mRNA	importin 5 [Source:HGNC Symbol;Acc:HGNC:6402]	2137.82	-0.200527	0.076259	0.0017423	0.0272228	4634	1890	2138	1772	1825	1718	1951	1799	2555.7	1990.57	2196.89	1757.26	1885.88	1771.63	1728.7	1856.75	Down Regulated
ENSG00000123405	ENSG00000123405.14	NFE2	54292111	54301015	-1	mRNA	nuclear factor, erythroid 2 [Source:HGNC Symbol;Acc:HGNC:7780]	47.296	-0.515596	0.255251	0.00174422	0.0272319	153	72	87	77	56	52	47	49	84.3812	75.8313	89.3963	76.3594	57.868	53.6234	41.6448	50.573	Down Regulated
ENSG00000161647	ENSG00000161647.18	MPP3	43800799	43833170	-1	mRNA	membrane palmitoylated protein 3 [Source:HGNC Symbol;Acc:HGNC:7221]	183.509	0.349001	0.156795	0.00175746	0.0274041	286	180	146	198	244	230	245	228	157.732	189.578	150.021	196.353	252.139	237.18	217.085	235.319	Up Regulated
ENSG00000058056	ENSG00000058056.9	USP13	179653032	179804366	1	mRNA	ubiquitin specific peptidase 13 [Source:HGNC Symbol;Acc:HGNC:12611]	810.848	-0.220265	0.0859692	0.00175796	0.0274041	1951	728	904	728	688	722	828	717	1076	766.739	928.899	721.943	710.949	744.54	733.658	740.017	Down Regulated
ENSG00000169684	ENSG00000169684.13	CHRNA5	78565520	78595269	1	mRNA	cholinergic receptor nicotinic alpha 5 subunit [Source:HGNC Symbol;Acc:HGNC:1959]	22.8495	-0.588409	0.297355	0.00176009	0.0274163	86	37	46	34	30	18	19	31	47.43	38.9689	47.267	33.7171	31.0007	18.5619	16.8351	31.9952	Down Regulated
ENSG00000257511	ENSG00000257511.1		32726383	32727387	-1	mRNA	nucleosome assembly protein 1-like 1 (NAP1L1) pseudogene	1863.76	0.240453	0.0965329	0.00176373	0.027431	2807	1886	1872	2283	2410	2184	2589	2317	1548.09	1986.36	1923.56	2264.01	2490.39	2252.18	2294.01	2391.38	Up Regulated
ENSG00000137807	ENSG00000137807.15	KIF23	69414246	69448427	1	mRNA	kinesin family member 23 [Source:HGNC Symbol;Acc:HGNC:6392]	915.586	-0.320173	0.140214	0.00176769	0.0274716	1468	886	1161	676	721	624	763	640	809.618	933.147	1192.98	670.376	745.05	643.48	676.064	660.545	Down Regulated
ENSG00000144481	ENSG00000144481.17	TRPM8	233917373	234019522	1	mRNA	transient receptor potential cation channel subfamily M member 8 [Source:HGNC Symbol;Acc:HGNC:17961]	2585.26	0.377754	0.174003	0.00178129	0.0276143	3073	2509	2201	3665	3541	3400	4068	3446	1694.79	2642.51	2261.62	3634.51	3659.12	3506.14	3604.49	3556.62	Up Regulated
ENSG00000137968	ENSG00000137968.16	SLC44A5	75202129	75611114	-1	mRNA	solute carrier family 44 member 5 [Source:HGNC Symbol;Acc:HGNC:28524]	355.615	0.30248	0.130467	0.00178196	0.0276143	611	438	334	483	526	465	634	497	336.973	461.307	343.2	478.981	543.546	479.516	561.762	512.955	Up Regulated
ENSG00000151287	ENSG00000151287.17	TEX30	102765888	102773811	-1	mRNA	testis expressed 30 [Source:HGNC Symbol;Acc:HGNC:25188]	298.424	-0.394787	0.183765	0.00178295	0.0276143	672	283	335	225	236	188	255	200	370.616	298.059	344.227	223.128	243.872	193.869	225.945	206.42	Down Regulated
ENSG00000170629	ENSG00000170629.14	DPY19L2P2	103175133	103280410	-1	mRNA	DPY19L2 pseudogene 2 [Source:HGNC Symbol;Acc:HGNC:21764]	103.081	-0.380439	0.179738	0.00178367	0.0276143	304	119	172	104	86	92	126	108	167.659	125.332	176.738	103.135	88.8687	94.8721	111.644	111.467	Down Regulated
ENSG00000168405	ENSG00000168405.17	CMAHP	25061626	25452263	-1	mRNA	cytidine monophospho-N-acetylneuraminic acid hydroxylase, pseudogene [Source:HGNC Symbol;Acc:HGNC:2098]	57.8563	-0.404196	0.189006	0.0017907	0.027702	169	88	108	68	73	66	76	41	93.2054	92.6827	110.975	67.4342	75.435	68.0604	67.3406	42.3162	Down Regulated
ENSG00000119943	ENSG00000119943.13	PYROXD2	98383565	98415182	-1	mRNA	pyridine nucleotide-disulphide oxidoreductase domain 2 [Source:HGNC Symbol;Acc:HGNC:23517]	191.695	0.485198	0.25611	0.00179218	0.0277038	96	113	88	110	146	155	142	144	52.9451	119.013	90.4238	109.085	150.87	159.839	125.821	148.623	Up Regulated
ENSG00000183647	ENSG00000183647.10	ZNF530	57599885	57612722	1	mRNA	zinc finger protein 530 [Source:HGNC Symbol;Acc:HGNC:29297]	181.179	-0.338041	0.150549	0.001797	0.0277571	468	195	292	183	172	163	217	160	258.107	205.377	300.043	181.477	177.737	168.089	192.275	165.136	Down Regulated
ENSG00000106484	ENSG00000106484.15	MEST	130486171	130506465	1	mRNA	mesoderm specific transcript [Source:HGNC Symbol;Acc:HGNC:7028]	120.705	-0.366585	0.168104	0.00181489	0.0280121	412	124	125	105	108	102	118	110	227.223	130.598	128.443	104.126	111.603	105.184	104.555	113.531	Down Regulated
ENSG00000159921	ENSG00000159921.15	GNE	36214441	36277042	-1	mRNA	glucosamine (UDP-N-acetyl)-2-epimerase/N-acetylmannosamine kinase [Source:HGNC Symbol;Acc:HGNC:23657]	1119.09	0.153087	0.0550416	0.00182429	0.0281315	1880	1134	1115	1323	1331	1308	1412	1249	1036.84	1194.34	1145.71	1311.99	1375.4	1348.83	1251.12	1289.09	Up Regulated
ENSG00000221930	ENSG00000221930.6	DENND10P1	130494965	130496588	1	mRNA	DENND10 pseudogene 1 [Source:HGNC Symbol;Acc:HGNC:30886]	433.059	0.22423	0.0887171	0.00182539	0.0281315	667	394	364	536	517	457	601	469	367.858	414.966	374.026	531.541	534.245	471.267	532.522	484.056	Up Regulated
ENSG00000113456	ENSG00000113456.19	RAD1	34905260	34918989	-1	mRNA	RAD1 checkpoint DNA exonuclease [Source:HGNC Symbol;Acc:HGNC:9806]	864.186	-0.190022	0.0717579	0.00183051	0.0281858	1529	723	898	784	697	672	798	696	843.261	761.473	922.734	777.477	720.249	692.979	707.076	718.343	Down Regulated
ENSG00000121274	ENSG00000121274.12	TENT4B	50152911	50235310	1	mRNA	terminal nucleotidyltransferase 4B [Source:HGNC Symbol;Acc:HGNC:30758]	619.362	0.215816	0.0845478	0.00183623	0.0282092	846	550	540	616	652	602	801	602	466.578	579.267	554.874	610.875	673.748	620.793	709.734	621.325	Up Regulated
ENSG00000065060	ENSG00000065060.17	UHRF1BP1	34792083	34877514	1	mRNA	UHRF1 binding protein 1 [Source:HGNC Symbol;Acc:HGNC:21216]	3371.25	-0.18849	0.0710302	0.00183708	0.0282092	6512	2189	2779	2537	2294	2276	2671	2545	3591.44	2305.48	2855.54	2515.89	2370.52	2347.05	2366.67	2626.7	Down Regulated
ENSG00000156171	ENSG00000156171.14	DRAM2	111117163	111140203	-1	mRNA	DNA damage regulated autophagy modulator 2 [Source:HGNC Symbol;Acc:HGNC:28769]	1977.69	0.204738	0.0789554	0.00183738	0.0282092	4119	2430	2438	3050	2994	2892	3453	3001	2271.67	2559.31	2505.15	3024.62	3093.87	2982.28	3059.57	3097.34	Up Regulated
ENSG00000030419	ENSG00000030419.16	IKZF2	212999691	213152427	-1	mRNA	IKAROS family zinc finger 2 [Source:HGNC Symbol;Acc:HGNC:13177]	81.8151	-0.389621	0.18085	0.00184513	0.0282855	313	89	109	117	77	100	87	93	172.623	93.7359	112.002	116.027	79.5685	103.122	77.0872	95.9855	Down Regulated
ENSG00000182853	ENSG00000182853.12	VMO1	4785285	4786433	-1	mRNA	vitelline membrane outer layer 1 homolog [Source:HGNC Symbol;Acc:HGNC:30387]	14.9527	0.854911	0.471894	0.00184744	0.0282995	28	13	11	35	40	47	41	42	15.4423	13.6918	11.303	34.7088	41.3343	48.4673	36.3285	43.3483	Up Regulated
ENSG00000011143	ENSG00000011143.16	MKS1	58205441	58219605	-1	mRNA	MKS transition zone complex subunit 1 [Source:HGNC Symbol;Acc:HGNC:7121]	172.561	-0.274326	0.115164	0.00185168	0.0283432	431	215	234	156	167	192	189	141	237.701	226.441	240.445	154.702	172.571	197.994	167.465	145.526	Down Regulated
ENSG00000148908	ENSG00000148908.15	RGS10	119499817	119542719	-1	mRNA	regulator of G protein signaling 10 [Source:HGNC Symbol;Acc:HGNC:9992]	881.278	0.205699	0.0795669	0.0018555	0.0283803	1130	679	552	872	772	827	975	729	623.208	715.132	567.204	864.745	797.751	852.818	863.909	752.402	Up Regulated
ENSG00000235422	ENSG00000235422.1	KATNBL1P3	2593674	2594913	-1	mRNA	katanin regulatory subunit B1 like 1 pseudogene 3 [Source:HGNC Symbol;Acc:HGNC:49053]	12.4182	-1.02569	0.525973	0.00186266	0.0284684	9	11	16	12	5	5	2	4	4.9636	11.5853	16.4407	11.9002	5.16678	5.15609	1.77212	4.12841	Down Regulated
ENSG00000110042	ENSG00000110042.8	DTX4	59171430	59208588	1	mRNA	deltex E3 ubiquitin ligase 4 [Source:HGNC Symbol;Acc:HGNC:29151]	348.75	0.424696	0.204367	0.00186604	0.0284886	465	224	263	365	367	382	518	407	256.453	235.92	270.244	361.963	379.242	393.925	458.979	420.065	Up Regulated
ENSG00000113273	ENSG00000113273.17	ARSB	78777209	78986087	-1	mRNA	arylsulfatase B [Source:HGNC Symbol;Acc:HGNC:714]	3815.16	-0.190276	0.0720576	0.00186721	0.0284886	8814	3452	3784	3471	3328	3259	3697	3415	4861.02	3635.69	3888.23	3442.12	3439.01	3360.74	3275.76	3524.63	Down Regulated
ENSG00000133606	ENSG00000133606.11	MKRN1	140453033	140479536	-1	mRNA	makorin ring finger protein 1 [Source:HGNC Symbol;Acc:HGNC:7112]	2460.45	0.166458	0.0610873	0.00186929	0.0284886	4132	2594	2559	3070	3017	2895	3450	2911	2278.84	2732.03	2629.48	3044.46	3117.64	2985.38	3056.91	3004.45	Up Regulated
ENSG00000104967	ENSG00000104967.7	NOVA2	45933734	45974044	-1	mRNA	NOVA alternative splicing regulator 2 [Source:HGNC Symbol;Acc:HGNC:7887]	6.3157	0.0925492	0.175941	0.0018696	0.0284886	2	1	3	3	13	5	4	8	1.10302	1.05321	3.08263	2.97504	13.4336	5.15609	3.54424	8.25681	Up Regulated
ENSG00000179941	ENSG00000179941.8	BBS10	76344474	76348415	-1	mRNA	Bardet-Biedl syndrome 10 [Source:HGNC Symbol;Acc:HGNC:26291]	892.492	0.23811	0.096251	0.00187556	0.028558	1588	1045	930	1238	1231	1254	1355	1261	875.8	1100.61	955.616	1227.7	1272.06	1293.15	1200.61	1301.48	Up Regulated
ENSG00000111696	ENSG00000111696.12	NT5DC3	103770453	103841234	-1	mRNA	5-nucleotidase domain containing 3 [Source:HGNC Symbol;Acc:HGNC:30826]	748.421	-0.225735	0.0897044	0.00188013	0.0285922	1195	564	683	510	502	501	562	496	659.056	594.012	701.812	505.757	518.745	516.64	497.966	511.922	Down Regulated
ENSG00000068615	ENSG00000068615.18	REEP1	86213993	86338083	-1	mRNA	receptor accessory protein 1 [Source:HGNC Symbol;Acc:HGNC:25786]	65.2858	-0.396133	0.181361	0.00188062	0.0285922	182	65	73	61	53	50	70	49	100.375	68.4588	75.0107	60.4925	54.7679	51.5609	62.0242	50.573	Down Regulated
ENSG00000161921	ENSG00000161921.15	CXCL16	4733533	4739928	-1	mRNA	C-X-C motif chemokine ligand 16 [Source:HGNC Symbol;Acc:HGNC:16642]	212.462	0.359573	0.17725	0.00188225	0.0285956	204	142	136	243	223	217	249	212	112.508	149.556	139.746	240.978	230.439	223.774	220.629	218.806	Up Regulated
ENSG00000159055	ENSG00000159055.4	MIS18A	32268228	32279049	-1	mRNA	MIS18 kinetochore protein A [Source:HGNC Symbol;Acc:HGNC:1286]	166.413	-0.350963	0.160056	0.0019021	0.0288561	394	221	240	138	150	135	181	151	217.295	232.76	246.61	136.852	155.003	139.214	160.377	155.847	Down Regulated
ENSG00000268043	ENSG00000268043.7	NBPF12	146938744	146996202	1	mRNA	NBPF member 12 [Source:HGNC Symbol;Acc:HGNC:24297]	1110.87	0.177335	0.0662474	0.00190224	0.0288561	1574	939	946	1108	1186	1100	1172	1080	868.079	988.967	972.056	1098.78	1225.56	1134.34	1038.46	1114.67	Up Regulated
ENSG00000234465	ENSG00000234465.11	PINLYP	43575801	43583964	1	mRNA	phospholipase A2 inhibitor and LY6/PLAUR domain containing [Source:HGNC Symbol;Acc:HGNC:44206]	6609.99	0.537062	0.276523	0.00191263	0.0289921	3698	2899	1846	3994	4254	4722	5231	4033	2039.49	3053.26	1896.85	3960.77	4395.9	4869.41	4634.98	4162.47	Up Regulated
ENSG00000124151	ENSG00000124151.19	NCOA3	47501887	47656877	1	mRNA	nuclear receptor coactivator 3 [Source:HGNC Symbol;Acc:HGNC:7670]	3989.9	0.222519	0.0884485	0.00192266	0.0291222	5159	3258	3167	4033	4077	3872	4452	3980	2845.25	3431.37	3254.23	3999.45	4212.99	3992.88	3944.74	4107.76	Up Regulated
ENSG00000078142	ENSG00000078142.13	PIK3C3	41955234	42087830	1	mRNA	phosphatidylinositol 3-kinase catalytic subunit type 3 [Source:HGNC Symbol;Acc:HGNC:8974]	1402.26	0.188078	0.0713704	0.00192473	0.0291222	2139	1225	1220	1401	1459	1462	1724	1354	1179.68	1290.19	1253.6	1389.34	1507.67	1507.64	1527.57	1397.47	Up Regulated
ENSG00000165626	ENSG00000165626.17	BEND7	13438484	13529014	-1	mRNA	BEN domain containing 7 [Source:HGNC Symbol;Acc:HGNC:23514]	103.564	0.39102	0.185367	0.0019282	0.0291222	110	59	66	83	95	107	95	91	60.6662	62.1396	67.8179	82.3094	98.1689	110.34	84.1757	93.9212	Up Regulated
ENSG00000170627	ENSG00000170627.11	GTSF1	54455950	54473602	-1	mRNA	gametocyte specific factor 1 [Source:HGNC Symbol;Acc:HGNC:26565]	765.503	-0.19594	0.0750964	0.00192942	0.0291222	1475	797	748	662	641	636	799	583	813.479	839.411	768.603	656.492	662.382	655.855	707.962	601.715	Down Regulated
ENSG00000109654	ENSG00000109654.15	TRIM2	153152163	153339319	1	mRNA	tripartite motif containing 2 [Source:HGNC Symbol;Acc:HGNC:15974]	4757.36	0.329829	0.148268	0.00193014	0.0291222	4130	4392	2893	4445	5068	4843	5244	4082	2277.74	4625.71	2972.68	4408.02	5237.05	4994.19	4646.5	4213.04	Up Regulated
ENSG00000140678	ENSG00000140678.16	ITGAX	31355134	31382999	1	mRNA	integrin subunit alpha X [Source:HGNC Symbol;Acc:HGNC:6152]	10397.4	0.378989	0.177846	0.00193111	0.0291222	9736	9926	8500	14280	13512	13986	14294	12946	5369.51	10454.2	8734.12	14161.2	13962.7	14422.6	12665.3	13361.6	Up Regulated
ENSG00000114904	ENSG00000114904.13	NEK4	52708444	52770946	-1	mRNA	NIMA related kinase 4 [Source:HGNC Symbol;Acc:HGNC:11399]	1092.22	0.16492	0.0606498	0.00193125	0.0291222	1996	1103	1129	1414	1394	1293	1534	1309	1100.82	1161.69	1160.1	1402.24	1440.5	1333.37	1359.22	1351.02	Up Regulated
ENSG00000111981	ENSG00000111981.5	ULBP1	149963943	149973715	1	mRNA	UL16 binding protein 1 [Source:HGNC Symbol;Acc:HGNC:14893]	133.798	0.336874	0.153099	0.00194185	0.0292604	143	80	103	151	130	146	178	109	78.8661	84.257	105.837	149.744	134.336	150.558	157.719	112.499	Up Regulated
ENSG00000151576	ENSG00000151576.10	QTRT2	114005833	114088422	1	mRNA	queuine tRNA-ribosyltransferase accessory subunit 2 [Source:HGNC Symbol;Acc:HGNC:25771]	1579.63	-0.215725	0.0850382	0.001945	0.0292687	3919	1640	1806	1532	1478	1486	1747	1439	2161.37	1727.27	1855.74	1519.25	1527.3	1532.39	1547.95	1485.19	Down Regulated
ENSG00000227105	ENSG00000227105.1	PARP1P1	110936759	110939784	1	mRNA	poly(ADP-ribose) polymerase 1 pseudogene 1 [Source:HGNC Symbol;Acc:HGNC:275]	696.428	-0.208624	0.0814079	0.00194591	0.0292687	1559	692	716	714	592	645	740	613	859.806	728.823	735.721	708.06	611.747	665.136	655.684	632.678	Down Regulated
ENSG00000141314	ENSG00000141314.13	RHBDL3	32265832	32324659	1	mRNA	rhomboid like 3 [Source:HGNC Symbol;Acc:HGNC:16502]	13.9228	-0.81509	0.432713	0.00194778	0.0292687	57	14	23	9	9	10	7	12	31.4361	14.745	23.6335	8.92512	9.30021	10.3122	6.20242	12.3852	Down Regulated
ENSG00000162769	ENSG00000162769.13	FLVCR1	212858275	212899363	1	mRNA	FLVCR heme transporter 1 [Source:HGNC Symbol;Acc:HGNC:24682]	751.315	-0.197145	0.0757468	0.00194817	0.0292687	1589	707	729	720	664	623	730	644	876.351	744.622	749.079	714.01	686.149	642.449	646.824	664.673	Down Regulated
ENSG00000162598	ENSG00000162598.13	C1orf87	59987269	60073770	-1	mRNA	chromosome 1 open reading frame 87 [Source:HGNC Symbol;Acc:HGNC:28547]	27.475	0.117998	0.22725	0.0019534	0.0293256	3	8	1	5	15	10	14	6	1.65453	8.4257	1.02754	4.9584	15.5003	10.3122	12.4048	6.19261	Up Regulated
ENSG00000225830	ENSG00000225830.13	ERCC6	49454168	49539538	-1	mRNA	ERCC excision repair 6, chromatin remodeling factor [Source:HGNC Symbol;Acc:HGNC:3438]	935.911	0.19972	0.077394	0.00196379	0.0294597	798	579	549	630	634	640	732	628	440.106	609.81	564.121	624.758	655.148	659.98	648.596	648.16	Up Regulated
ENSG00000152990	ENSG00000152990.14	ADGRA3	22345071	22516066	-1	mRNA	adhesion G protein-coupled receptor A3 [Source:HGNC Symbol;Acc:HGNC:13839]	639.213	-0.209105	0.0817865	0.00197033	0.0295237	1183	523	581	497	520	485	512	438	652.438	550.83	597.003	492.865	537.345	500.141	453.663	452.061	Down Regulated
ENSG00000112818	ENSG00000112818.10	MEP1A	46793389	46839778	1	mRNA	meprin A subunit alpha [Source:HGNC Symbol;Acc:HGNC:7015]	12.9536	0.850872	0.485958	0.00197096	0.0295237	3	11	8	19	21	16	31	19	1.65453	11.5853	8.22035	18.8419	21.7005	16.4995	27.4679	19.6099	Up Regulated
ENSG00000108578	ENSG00000108578.15	BLMH	30248203	30292056	-1	mRNA	bleomycin hydrolase [Source:HGNC Symbol;Acc:HGNC:1059]	750.661	-0.192368	0.0736033	0.00198754	0.0297502	1843	803	800	745	691	682	835	764	1016.44	845.73	822.035	738.802	714.049	703.291	739.86	788.526	Down Regulated
ENSG00000119638	ENSG00000119638.13	NEK9	75079353	75127344	-1	mRNA	NIMA related kinase 9 [Source:HGNC Symbol;Acc:HGNC:18591]	2290.4	0.175116	0.0655376	0.00199267	0.0298049	4280	2032	2239	2770	2715	2522	3212	2642	2360.47	2140.13	2300.67	2746.95	2805.56	2600.73	2846.03	2726.81	Up Regulated
ENSG00000119333	ENSG00000119333.11	DYNC2I2	128633653	128656847	-1	mRNA	dynein 2 intermediate chain 2 [Source:HGNC Symbol;Acc:HGNC:28296]	569.77	-0.550205	0.288239	0.00199648	0.02984	1178	544	704	373	305	317	435	344	649.68	572.948	723.391	369.897	315.174	326.896	385.436	355.043	Down Regulated
ENSG00000172349	ENSG00000172349.17	IL16	81159575	81314058	1	mRNA	interleukin 16 [Source:HGNC Symbol;Acc:HGNC:5980]	282.252	0.394861	0.189531	0.00200306	0.0299162	440	420	357	569	600	538	649	535	242.665	442.349	366.833	564.266	620.014	554.795	575.053	552.174	Up Regulated
ENSG00000164684	ENSG00000164684.13	ZNF704	80628451	80874781	-1	mRNA	zinc finger protein 704 [Source:HGNC Symbol;Acc:HGNC:32291]	952	0.308586	0.136923	0.00200932	0.0299877	1563	889	946	1221	1259	1228	1521	1256	862.012	936.306	972.056	1210.84	1301	1266.34	1347.7	1296.32	Up Regulated
ENSG00000076864	ENSG00000076864.19	RAP1GAP	21596221	21669357	-1	mRNA	RAP1 GTPase activating protein [Source:HGNC Symbol;Acc:HGNC:9858]	24.287	0.725355	0.403131	0.00201789	0.0300715	13	12	12	21	27	19	28	29	7.16965	12.6386	12.3305	20.8253	27.9006	19.5931	24.8097	29.9309	Up Regulated
ENSG00000085382	ENSG00000085382.12	HACE1	104728094	104859919	-1	mRNA	HECT domain and ankyrin repeat containing E3 ubiquitin protein ligase 1 [Source:HGNC Symbol;Acc:HGNC:21033]	645.525	-0.242552	0.0997701	0.00204055	0.0303147	1136	542	616	526	455	449	557	478	626.517	570.841	632.967	521.624	470.177	463.017	493.535	493.345	Down Regulated
ENSG00000118473	ENSG00000118473.22	SGIP1	66533267	66751139	1	mRNA	SH3GL interacting endocytic adaptor 1 [Source:HGNC Symbol;Acc:HGNC:25412]	721.118	0.30253	0.133753	0.00204168	0.0303147	1386	774	693	1150	1141	1048	1239	1075	764.395	815.187	712.088	1140.43	1179.06	1080.72	1097.83	1109.51	Up Regulated
ENSG00000184860	ENSG00000184860.10	SDR42E1	81988855	82011481	-1	mRNA	short chain dehydrogenase/reductase family 42E, member 1 [Source:HGNC Symbol;Acc:HGNC:29834]	15.8357	-1.00889	0.542683	0.00204559	0.0303506	14	12	15	13	5	7	3	3	7.72116	12.6386	15.4132	12.8918	5.16678	7.21853	2.65818	3.0963	Down Regulated
ENSG00000142875	ENSG00000142875.19	PRKACB	84078062	84238498	1	mRNA	protein kinase cAMP-activated catalytic subunit beta [Source:HGNC Symbol;Acc:HGNC:9381]	1743.41	-0.237262	0.0970601	0.00205143	0.0304151	4365	2026	2154	1759	1668	1628	2013	1729	2407.35	2133.81	2213.33	1744.37	1723.64	1678.82	1783.64	1784.5	Down Regulated
ENSG00000109943	ENSG00000109943.9	CRTAM	122838500	122872643	1	mRNA	cytotoxic and regulatory T cell molecule [Source:HGNC Symbol;Acc:HGNC:24313]	49.2811	0.524304	0.275422	0.00205991	0.0305186	76	77	62	130	116	125	150	124	41.9149	81.0974	63.7077	128.918	119.869	128.902	132.909	127.981	Up Regulated
ENSG00000131370	ENSG00000131370.16	SH3BP5	15254353	15341368	-1	mRNA	SH3 domain binding protein 5 [Source:HGNC Symbol;Acc:HGNC:10827]	86.892	0.533313	0.280953	0.00206816	0.0306184	66	32	38	105	85	92	93	81	36.3997	33.7028	39.0467	104.126	87.8353	94.8721	82.4036	83.6002	Up Regulated
ENSG00000268942	ENSG00000268942.2	CKS1BP3	62512246	62512482	-1	mRNA	CDC28 protein kinase regulatory subunit 1B pseudogene 3 [Source:HGNC Symbol;Acc:HGNC:24233]	103.304	-0.452679	0.227766	0.00207203	0.0306534	222	130	226	87	79	92	97	113	122.435	136.918	232.225	86.2762	81.6352	94.8721	85.9478	116.627	Down Regulated
ENSG00000183605	ENSG00000183605.16	SFXN4	119140767	119165714	-1	mRNA	sideroflexin 4 [Source:HGNC Symbol;Acc:HGNC:16088]	173.375	-0.272753	0.116319	0.00207455	0.0306654	366	152	138	188	133	144	155	126	201.853	160.088	141.801	186.436	137.436	148.495	137.339	130.045	Down Regulated
ENSG00000223915	ENSG00000223915.1	DPPA2P1	13230884	13231439	1	mRNA	developmental pluripotency associated 2 pseudogene 1 [Source:HGNC Symbol;Acc:HGNC:38448]	52.0962	-0.488857	0.247636	0.00207586	0.0306654	84	44	43	43	27	42	26	20	46.3269	46.3414	44.1844	42.6422	27.9006	43.3112	23.0376	20.642	Down Regulated
ENSG00000008394	ENSG00000008394.13	MGST1	16347142	16609259	1	mRNA	microsomal glutathione S-transferase 1 [Source:HGNC Symbol;Acc:HGNC:7061]	1787.35	0.254189	0.106504	0.00207908	0.0306905	4204	1699	1785	2513	2451	2381	3137	2624	2318.55	1789.41	1834.17	2492.09	2532.76	2455.33	2779.57	2708.23	Up Regulated
ENSG00000079931	ENSG00000079931.15	MOXD1	132296055	132401475	-1	mRNA	monooxygenase DBH like 1 [Source:HGNC Symbol;Acc:HGNC:21063]	26.9445	-0.534822	0.275288	0.002082	0.0307113	64	31	43	22	23	22	16	21	35.2967	32.6496	44.1844	21.817	23.7672	22.6868	14.177	21.6741	Down Regulated
ENSG00000167523	ENSG00000167523.13	SPATA33	89657740	89671272	1	mRNA	spermatogenesis associated 33 [Source:HGNC Symbol;Acc:HGNC:26463]	218.275	-0.338035	0.155188	0.00209199	0.0308141	507	208	277	173	187	159	214	158	279.616	219.068	284.63	171.561	193.238	163.964	189.617	163.072	Down Regulated
ENSG00000139220	ENSG00000139220.16	PPFIA2	81257975	81759553	-1	mRNA	PTPRF interacting protein alpha 2 [Source:HGNC Symbol;Acc:HGNC:9246]	298.673	0.748691	0.426883	0.00210304	0.0309543	155	152	141	722	560	543	618	571	85.4842	160.088	144.884	715.993	578.68	559.952	547.585	589.33	Up Regulated
ENSG00000257043	ENSG00000257043.1	SRSF3P1	18665050	18665548	1	mRNA	SRSF3 pseudogene 1 [Source:HGNC Symbol;Acc:HGNC:54691]	394.906	-0.228612	0.092904	0.00212966	0.0313163	919	441	442	412	369	343	427	395	506.839	464.467	454.174	408.572	381.309	353.708	378.348	407.68	Down Regulated
ENSG00000129749	ENSG00000129749.3	CHRNA10	3665587	3671384	-1	mRNA	cholinergic receptor nicotinic alpha 10 subunit [Source:HGNC Symbol;Acc:HGNC:13800]	43.9491	-0.593426	0.316065	0.00213195	0.0313163	81	45	42	17	22	24	21	21	44.6724	47.3946	43.1568	16.8586	22.7338	24.7492	18.6073	21.6741	Down Regulated
ENSG00000104447	ENSG00000104447.12	TRPS1	115408496	115809673	-1	mRNA	transcriptional repressor GATA binding 1 [Source:HGNC Symbol;Acc:HGNC:12340]	6776.51	-0.178863	0.0678888	0.00213259	0.0313163	14997	5634	6164	5819	5700	5635	6206	5450	8271.01	5933.8	6333.78	5770.59	5890.13	5810.91	5498.89	5624.95	Down Regulated
ENSG00000197892	ENSG00000197892.13	KIF13B	29067278	29263124	-1	mRNA	kinesin family member 13B [Source:HGNC Symbol;Acc:HGNC:14405]	1160.13	-0.178738	0.0677853	0.0021338	0.0313163	2204	979	1106	925	852	934	1051	935	1215.53	1031.1	1136.46	917.304	880.42	963.158	931.249	965.015	Down Regulated
ENSG00000087191	ENSG00000087191.13	PSMC5	63827152	63832026	1	mRNA	proteasome 26S subunit, ATPase 5 [Source:HGNC Symbol;Acc:HGNC:9552]	745.504	-0.216683	0.0856341	0.00213766	0.0313502	1630	703	736	703	591	619	747	668	898.963	740.409	756.272	697.151	610.714	638.324	661.887	689.444	Down Regulated
ENSG00000138678	ENSG00000138678.11	GPAT3	83535914	83605875	1	mRNA	glycerol-3-phosphate acyltransferase 3 [Source:HGNC Symbol;Acc:HGNC:28157]	725.309	0.295786	0.1309	0.0021399	0.0313502	1818	843	757	1321	1250	1212	1496	1245	1002.65	887.858	777.851	1310.01	1291.7	1249.84	1325.55	1284.97	Up Regulated
ENSG00000173210	ENSG00000173210.19	ABLIM3	149141483	149260542	1	mRNA	actin binding LIM protein family member 3 [Source:HGNC Symbol;Acc:HGNC:29132]	458.659	0.286431	0.125729	0.00214592	0.0314035	599	403	340	569	498	536	585	529	330.355	424.445	349.365	564.266	514.612	552.733	518.345	545.982	Up Regulated
ENSG00000128578	ENSG00000128578.10	STRIP2	129434432	129488399	1	mRNA	striatin interacting protein 2 [Source:HGNC Symbol;Acc:HGNC:22209]	342.468	-0.261941	0.111449	0.00214856	0.031407	577	315	360	277	251	251	295	246	318.222	331.762	369.916	274.695	259.372	258.836	261.388	253.897	Down Regulated
ENSG00000179542	ENSG00000179542.16	SLITRK4	143622790	143636101	-1	mRNA	SLIT and NTRK like family member 4 [Source:HGNC Symbol;Acc:HGNC:23502]	1780.28	0.216165	0.0867017	0.00215004	0.031407	2323	1840	1617	1953	2039	1970	2285	1910	1281.16	1937.91	1661.54	1936.75	2107.01	2031.5	2024.65	1971.31	Up Regulated
ENSG00000111788	ENSG00000111788.10		9277235	9313241	1	mRNA	DEAD/H (Asp-Glu-Ala-Asp/His) box polypeptide like pseudogene	37.8294	-0.545658	0.286822	0.00215081	0.031407	73	32	62	44	21	30	33	25	40.2603	33.7028	63.7077	43.6339	21.7005	30.9365	29.24	25.8025	Down Regulated
ENSG00000126216	ENSG00000126216.15	TUBGCP3	112485011	112588205	-1	mRNA	tubulin gamma complex associated protein 3 [Source:HGNC Symbol;Acc:HGNC:18598]	699.729	-0.202176	0.0790691	0.00219745	0.0320191	1201	510	669	522	517	476	592	482	662.365	537.139	687.427	517.657	534.245	490.86	524.548	497.473	Down Regulated
ENSG00000169188	ENSG00000169188.5	APEX2	55000363	55009057	1	mRNA	apurinic/apyrimidinic endodeoxyribonuclease 2 [Source:HGNC Symbol;Acc:HGNC:17889]	586.059	-0.306512	0.137999	0.0022014	0.0320537	1365	597	700	553	490	516	545	490	752.813	628.768	719.281	548.399	506.345	532.109	482.903	505.73	Down Regulated
ENSG00000152684	ENSG00000152684.11	PELO	52787916	52804044	1	mRNA	pelota mRNA surveillance and ribosome rescue factor [Source:HGNC Symbol;Acc:HGNC:8829]	414.827	-0.25352	0.107152	0.00220557	0.0320914	948	520	451	403	334	394	446	401	522.833	547.671	463.422	399.647	345.141	406.3	395.183	413.873	Down Regulated
ENSG00000082269	ENSG00000082269.16	FAM135A	70412941	70561174	1	mRNA	family with sequence similarity 135 member A [Source:HGNC Symbol;Acc:HGNC:21084]	1239.68	-0.242738	0.0987516	0.00220905	0.032119	3132	1446	1450	1276	1237	1176	1358	1189	1727.33	1522.95	1489.94	1265.38	1278.26	1212.71	1203.27	1227.17	Down Regulated
ENSG00000172469	ENSG00000172469.16	MANEA	95577485	95609470	1	mRNA	mannosidase endo-alpha [Source:HGNC Symbol;Acc:HGNC:21072]	1159.68	-0.269994	0.11675	0.00222392	0.0323121	3093	1444	1560	1238	1248	1084	1416	1106	1705.82	1520.84	1602.97	1227.7	1289.63	1117.84	1254.66	1141.5	Down Regulated
ENSG00000166974	ENSG00000166974.12	MAPRE2	34976928	35143470	1	mRNA	microtubule associated protein RP/EB family member 2 [Source:HGNC Symbol;Acc:HGNC:6891]	1327	-0.184926	0.0712924	0.00223772	0.0324759	2637	1360	1527	1190	1197	1196	1319	1181	1454.34	1432.37	1569.06	1180.1	1236.93	1233.34	1168.71	1218.91	Down Regulated
ENSG00000187037	ENSG00000187037.8	GPR141	37683766	37833788	1	mRNA	G protein-coupled receptor 141 [Source:HGNC Symbol;Acc:HGNC:19997]	78.7668	-0.648608	0.362433	0.00223839	0.0324759	280	69	109	61	41	52	61	64	154.423	72.6717	112.002	60.4925	42.3676	53.6234	54.0497	66.0545	Down Regulated
ENSG00000198554	ENSG00000198554.12	WDHD1	54938949	55027105	-1	mRNA	WD repeat and HMG-box DNA binding protein 1 [Source:HGNC Symbol;Acc:HGNC:23170]	755.609	-0.285755	0.126463	0.00227281	0.0329286	1712	806	1033	632	671	621	751	695	944.187	848.89	1061.45	626.742	693.382	640.387	665.431	717.311	Down Regulated
ENSG00000100380	ENSG00000100380.14	ST13	40824535	40856639	-1	mRNA	ST13 Hsp70 interacting protein [Source:HGNC Symbol;Acc:HGNC:11343]	2949.93	0.166059	0.0624282	0.00227284	0.0329286	5807	2959	2955	3476	3625	3431	4103	3575	3202.63	3116.46	3036.39	3447.08	3745.92	3538.11	3635.5	3689.76	Up Regulated
ENSG00000129255	ENSG00000129255.16	MPDU1	7583529	7592789	1	mRNA	mannose-P-dolichol utilization defect 1 [Source:HGNC Symbol;Acc:HGNC:7207]	477.955	-0.23723	0.0986172	0.0022795	0.0330016	974	478	473	410	375	358	462	408	537.172	503.436	486.028	406.589	387.509	369.176	409.36	421.097	Down Regulated
ENSG00000122986	ENSG00000122986.13	HVCN1	110627841	110704950	-1	mRNA	hydrogen voltage gated channel 1 [Source:HGNC Symbol;Acc:HGNC:28240]	390.944	0.394335	0.200444	0.00230142	0.0332952	392	426	360	525	549	512	674	528	216.192	448.669	369.916	520.632	567.313	527.984	597.205	544.95	Up Regulated
ENSG00000214357	ENSG00000214357.8	NEURL1B	172641263	172691540	1	mRNA	neuralized E3 ubiquitin protein ligase 1B [Source:HGNC Symbol;Acc:HGNC:35422]	158.825	-0.525844	0.283872	0.00230356	0.0333024	157	120	137	62	71	56	70	56	86.5873	126.386	140.773	61.4842	73.3683	57.7482	62.0242	57.7977	Down Regulated
ENSG00000176953	ENSG00000176953.12	NFATC2IP	28950807	28967092	1	mRNA	nuclear factor of activated T cells 2 interacting protein [Source:HGNC Symbol;Acc:HGNC:25906]	1026.05	-0.204494	0.082512	0.00233406	0.0336932	1985	975	1239	926	857	878	1053	887	1094.75	1026.88	1273.13	918.296	885.587	905.41	933.021	915.474	Down Regulated
ENSG00000213252	ENSG00000213252.3		106826392	106827890	-1	mRNA	pyridine nucleotide-disulphide oxidoreductase domain 1 (PYROXD1) pseudogene	188.625	0.247419	0.104639	0.00233705	0.0336932	275	181	150	230	235	196	246	214	151.666	190.632	154.132	228.086	242.839	202.119	217.971	220.87	Up Regulated
ENSG00000125351	ENSG00000125351.11	UPF3B	119805311	119852998	-1	mRNA	UPF3B regulator of nonsense mediated mRNA decay [Source:HGNC Symbol;Acc:HGNC:20439]	293.787	-0.317068	0.145629	0.00233723	0.0336932	501	229	364	201	211	191	191	234	276.307	241.186	374.026	199.328	218.038	196.963	169.237	241.512	Down Regulated
ENSG00000050628	ENSG00000050628.20	PTGER3	70852353	71047816	-1	mRNA	prostaglandin E receptor 3 [Source:HGNC Symbol;Acc:HGNC:9595]	54.2829	0.559776	0.315014	0.00235264	0.0338673	22	58	35	46	59	54	89	58	12.1332	61.0863	35.964	45.6173	60.968	55.6858	78.8593	59.8619	Up Regulated
ENSG00000167733	ENSG00000167733.13	HSD11B1L	5680604	5688523	1	mRNA	hydroxysteroid 11-beta dehydrogenase 1 like [Source:HGNC Symbol;Acc:HGNC:30419]	27.3343	0.555474	0.303844	0.00235357	0.0338673	32	18	18	28	38	26	49	28	17.6484	18.9578	18.4958	27.767	39.2675	26.8117	43.4169	28.8988	Up Regulated
ENSG00000171862	ENSG00000171862.11	PTEN	87862638	87971930	1	mRNA	phosphatase and tensin homolog [Source:HGNC Symbol;Acc:HGNC:9588]	126.421	0.353417	0.169318	0.00235431	0.0338673	141	76	72	72	96	108	109	108	77.7631	80.0442	73.9831	71.401	99.2022	111.372	96.5806	111.467	Up Regulated
ENSG00000177453	ENSG00000177453.7	NIM1K	43192071	43280850	1	mRNA	NIM1 serine/threonine protein kinase [Source:HGNC Symbol;Acc:HGNC:28646]	115.656	-0.49496	0.250644	0.00235905	0.0339115	428	119	182	98	89	108	122	100	236.047	125.332	187.013	97.1846	91.9687	111.372	108.099	103.21	Down Regulated
ENSG00000214189	ENSG00000214189.9	ZNF788P	12092263	12137235	1	mRNA	zinc finger family member 788, pseudogene [Source:HGNC Symbol;Acc:HGNC:33112]	28.7455	-0.76386	0.421605	0.00236357	0.0339525	37	10	21	12	7	10	8	7	20.4059	10.5321	21.5784	11.9002	7.2335	10.3122	7.08848	7.22471	Down Regulated
ENSG00000138134	ENSG00000138134.12	STAMBPL1	88879734	88975153	1	mRNA	STAM binding protein like 1 [Source:HGNC Symbol;Acc:HGNC:24105]	36.011	-0.459187	0.237105	0.00236633	0.0339641	85	54	45	47	28	32	45	24	46.8785	56.8735	46.2395	46.609	28.934	32.999	39.8727	24.7704	Down Regulated
ENSG00000101849	ENSG00000101849.16	TBL1X	9463320	9741037	1	mRNA	transducin beta like 1 X-linked [Source:HGNC Symbol;Acc:HGNC:11585]	236.457	0.372654	0.183091	0.00236772	0.0339641	187	109	174	191	205	205	233	181	103.133	114.8	178.793	189.411	211.838	211.4	206.452	186.81	Up Regulated
ENSG00000173085	ENSG00000173085.14	COQ2	83261536	83284914	-1	mRNA	coenzyme Q2, polyprenyltransferase [Source:HGNC Symbol;Acc:HGNC:25223]	340.876	-0.25228	0.10768	0.0023704	0.0339786	773	356	383	279	296	262	320	323	426.318	374.944	393.549	276.679	305.874	270.179	283.539	333.369	Down Regulated
ENSG00000136167	ENSG00000136167.14	LCP1	46125920	46211871	-1	mRNA	lymphocyte cytosolic protein 1 [Source:HGNC Symbol;Acc:HGNC:6528]	48709	0.149251	0.055077	0.00237208	0.0339786	82369	56818	53794	59492	60631	59618	69692	58913	45427.4	59841.5	55275.7	58997	62653.4	61479.2	61751.3	60804.2	Up Regulated
ENSG00000166578	ENSG00000166578.10	IQCD	113195441	113221094	-1	mRNA	IQ motif containing D [Source:HGNC Symbol;Acc:HGNC:25168]	91.8014	-0.392062	0.193668	0.00237577	0.0339952	288	99	131	92	73	89	104	83	158.835	104.268	134.608	91.2346	75.435	91.7784	92.1503	85.6644	Down Regulated
ENSG00000178966	ENSG00000178966.16	RMI1	83980798	84004074	1	mRNA	RecQ mediated genome instability 1 [Source:HGNC Symbol;Acc:HGNC:25764]	507.699	-0.325193	0.151792	0.00237808	0.0339952	983	521	463	389	365	346	428	338	542.136	548.724	475.753	385.764	377.175	356.802	379.234	348.85	Down Regulated
ENSG00000177917	ENSG00000177917.10	ARL6IP6	152717647	152762396	1	mRNA	ADP ribosylation factor like GTPase 6 interacting protein 6 [Source:HGNC Symbol;Acc:HGNC:24048]	569.572	-0.26488	0.115168	0.00237826	0.0339952	1489	738	812	606	567	528	748	603	821.2	777.271	834.365	600.958	585.913	544.483	662.773	622.357	Down Regulated
ENSG00000134242	ENSG00000134242.16	PTPN22	113813811	113871753	-1	mRNA	protein tyrosine phosphatase non-receptor type 22 [Source:HGNC Symbol;Acc:HGNC:9652]	244.014	-0.427464	0.218122	0.00238146	0.034017	763	177	224	235	173	187	180	189	420.803	186.419	230.17	233.045	178.771	192.838	159.491	195.067	Down Regulated
ENSG00000135454	ENSG00000135454.14	B4GALNT1	57623409	57633239	-1	mRNA	beta-1,4-N-acetyl-galactosaminyltransferase 1 [Source:HGNC Symbol;Acc:HGNC:4117]	113.856	0.464103	0.245233	0.00238405	0.0340302	94	51	60	127	91	115	132	116	51.8421	53.7139	61.6526	125.943	94.0354	118.59	116.96	119.724	Up Regulated
ENSG00000244217	ENSG00000244217.1	RPS4XP10	94352923	94353653	1	mRNA	ribosomal protein S4X pseudogene 10 [Source:HGNC Symbol;Acc:HGNC:35741]	9.32829	-0.0848387	0.164679	0.00240257	0.0342497	6	4	16	2	2	2	1	0	3.30907	4.21285	16.4407	1.98336	2.06671	2.06244	0.88606	0	Down Regulated
ENSG00000166619	ENSG00000166619.14	BLCAP	37492472	37527931	-1	mRNA	BLCAP apoptosis inducing factor [Source:HGNC Symbol;Acc:HGNC:1055]	1918.19	0.167476	0.0635899	0.00240281	0.0342497	3179	1808	1854	2067	2105	2162	2358	2128	1753.25	1904.21	1905.07	2049.8	2175.22	2229.49	2089.33	2196.31	Up Regulated
ENSG00000162174	ENSG00000162174.12	ASRGL1	62337448	62393412	1	mRNA	asparaginase and isoaspartyl peptidase 1 [Source:HGNC Symbol;Acc:HGNC:16448]	62.1417	-0.402687	0.202913	0.00241113	0.0343213	180	104	132	72	72	65	65	85	99.272	109.534	135.636	71.401	74.4017	67.0292	57.5939	87.7286	Down Regulated
ENSG00000155659	ENSG00000155659.15	VSIG4	66021738	66040125	-1	mRNA	V-set and immunoglobulin domain containing 4 [Source:HGNC Symbol;Acc:HGNC:17032]	395.689	0.345938	0.166153	0.00241121	0.0343213	474	551	522	589	650	640	761	642	261.416	580.32	536.378	584.1	671.682	659.98	674.292	662.609	Up Regulated
ENSG00000196141	ENSG00000196141.14	SPATS2L	200305881	200482264	1	mRNA	spermatogenesis associated serine rich 2 like [Source:HGNC Symbol;Acc:HGNC:24574]	1451.43	-0.266026	0.116215	0.00241408	0.0343381	2192	1117	1206	928	872	861	996	913	1208.91	1176.44	1239.22	920.279	901.087	887.879	882.516	942.309	Down Regulated
ENSG00000179750	ENSG00000179750.16	APOBEC3B	38982347	38992804	1	mRNA	apolipoprotein B mRNA editing enzyme catalytic subunit 3B [Source:HGNC Symbol;Acc:HGNC:17352]	71.4084	-0.594386	0.336532	0.0024174	0.0343612	109	67	107	46	46	39	37	39	60.1147	70.5653	109.947	45.6173	47.5344	40.2175	32.7842	40.252	Down Regulated
ENSG00000132716	ENSG00000132716.18	DCAF8	160215715	160262549	-1	mRNA	DDB1 and CUL4 associated factor 8 [Source:HGNC Symbol;Acc:HGNC:24891]	1630.62	0.153235	0.0570562	0.00242274	0.0344131	2579	1361	1512	1835	1788	1720	1913	1646	1422.35	1433.42	1553.65	1819.73	1847.64	1773.7	1695.03	1698.84	Up Regulated
ENSG00000028137	ENSG00000028137.19	TNFRSF1B	12166991	12209228	1	mRNA	TNF receptor superfamily member 1B [Source:HGNC Symbol;Acc:HGNC:11917]	5007.46	0.408432	0.207878	0.00244261	0.0346469	4560	3642	3063	5125	4983	5475	6014	5000	2514.89	3835.8	3147.37	5082.36	5149.22	5645.92	5328.77	5160.51	Up Regulated
ENSG00000137462	ENSG00000137462.7	TLR2	153684070	153706260	1	mRNA	toll like receptor 2 [Source:HGNC Symbol;Acc:HGNC:11848]	8498.01	0.256758	0.111136	0.00244921	0.034692	11233	6039	5528	7425	7922	7891	9040	7356	6195.13	6360.35	5680.26	7363.22	8186.25	8137.34	8009.98	7592.14	Up Regulated
ENSG00000134285	ENSG00000134285.11	FKBP11	48921518	48926474	-1	mRNA	FKBP prolyl isomerase 11 [Source:HGNC Symbol;Acc:HGNC:18624]	165.781	-0.300849	0.132288	0.00245171	0.0347032	318	142	151	148	146	87	118	140	175.381	149.556	155.159	146.769	150.87	89.716	104.555	144.494	Down Regulated
ENSG00000158164	ENSG00000158164.7	TMSB15A	102513682	102516739	-1	mRNA	thymosin beta 15A [Source:HGNC Symbol;Acc:HGNC:30744]	23.1077	-0.634831	0.363553	0.00245946	0.0347887	73	44	55	18	16	19	18	34	40.2603	46.3414	56.5149	17.8502	16.5337	19.5931	15.9491	35.0915	Down Regulated
ENSG00000277147	ENSG00000277147.6	LINC00869	149606209	149705716	1	mRNA	long intergenic non-protein coding RNA 869 [Source:HGNC Symbol;Acc:HGNC:29050]	150.734	-0.278767	0.124184	0.00247896	0.0349924	283	156	168	132	104	133	136	120	156.078	164.301	172.627	130.902	107.469	137.152	120.504	123.852	Down Regulated
ENSG00000114405	ENSG00000114405.10	C3orf14	62319015	62336213	1	mRNA	chromosome 3 open reading frame 14 [Source:HGNC Symbol;Acc:HGNC:25024]	176.205	-0.310493	0.143583	0.00247903	0.0349924	488	218	232	184	183	170	189	165	269.137	229.6	238.39	182.469	189.104	175.307	167.465	170.297	Down Regulated
ENSG00000137193	ENSG00000137193.14	PIM1	37170152	37175428	1	mRNA	Pim-1 proto-oncogene, serine/threonine kinase [Source:HGNC Symbol;Acc:HGNC:8986]	2319.16	0.284747	0.128308	0.00249927	0.0352292	3110	1752	1809	2333	2308	2530	2776	2393	1715.2	1845.23	1858.83	2313.59	2384.99	2608.98	2459.7	2469.82	Up Regulated
ENSG00000111196	ENSG00000111196.10	MAGOHB	10604193	10613609	-1	mRNA	mago homolog B, exon junction complex subunit [Source:HGNC Symbol;Acc:HGNC:25504]	251.284	-0.256413	0.111048	0.00250101	0.0352292	629	254	317	280	249	183	286	274	346.901	267.516	325.731	277.67	257.306	188.713	253.413	282.796	Down Regulated
ENSG00000173960	ENSG00000173960.14	UBXN2A	23927285	24004909	1	mRNA	UBX domain protein 2A [Source:HGNC Symbol;Acc:HGNC:27265]	278.696	-0.206299	0.0833573	0.00250406	0.0352477	646	297	381	342	314	260	344	275	356.276	312.804	391.494	339.155	324.474	268.117	304.805	283.828	Down Regulated
ENSG00000007237	ENSG00000007237.18	GAS7	9910606	10198606	-1	mRNA	growth arrest specific 7 [Source:HGNC Symbol;Acc:HGNC:4169]	4307.01	0.265586	0.11684	0.00250982	0.0352531	5611	2774	2935	3860	3826	3881	4611	4018	3094.53	2921.61	3015.84	3827.88	3953.62	4002.16	4085.62	4146.98	Up Regulated
ENSG00000135956	ENSG00000135956.8	TMEM127	96248514	96265997	-1	mRNA	transmembrane protein 127 [Source:HGNC Symbol;Acc:HGNC:26038]	3060.28	0.184019	0.0720481	0.00251011	0.0352531	4147	2440	2412	2807	2852	2941	3102	2918	2287.12	2569.84	2478.44	2783.65	2947.13	3032.81	2748.56	3011.67	Up Regulated
ENSG00000170915	ENSG00000170915.9	PAQR8	52361421	52407777	1	mRNA	progestin and adipoQ receptor family member 8 [Source:HGNC Symbol;Acc:HGNC:15708]	551.167	-0.339326	0.162637	0.00251254	0.0352531	914	378	473	274	288	287	360	303	504.081	398.114	486.028	271.72	297.607	295.96	318.982	312.727	Down Regulated
ENSG00000197046	ENSG00000197046.11	SIGLEC15	45825675	45844094	1	mRNA	sialic acid binding Ig like lectin 15 [Source:HGNC Symbol;Acc:HGNC:27596]	254.149	0.404598	0.206673	0.00251312	0.0352531	333	187	149	238	263	272	334	263	183.653	196.951	153.104	236.02	271.773	280.491	295.944	271.443	Up Regulated
ENSG00000235036	ENSG00000235036.4		10612861	10614229	-1	mRNA	pseudogene similar to DNAJ protein	156.965	-0.304669	0.138907	0.00251901	0.0353114	345	155	183	112	109	145	133	120	190.271	163.248	188.04	111.068	112.636	149.527	117.846	123.852	Down Regulated
ENSG00000105993	ENSG00000105993.15	DNAJB6	157335381	157417439	1	mRNA	DnaJ heat shock protein family (Hsp40) member B6 [Source:HGNC Symbol;Acc:HGNC:14888]	2406.85	0.211838	0.0866621	0.00255102	0.0357107	3040	1655	1674	1976	1983	2119	2387	2050	1676.59	1743.07	1720.11	1959.56	2049.15	2185.15	2115.03	2115.81	Up Regulated
ENSG00000164542	ENSG00000164542.12	KIAA0895	36324152	36390125	-1	mRNA	KIAA0895 [Source:HGNC Symbol;Acc:HGNC:22206]	92.0879	-0.479032	0.259061	0.00255576	0.0357525	171	106	117	55	53	48	75	68	94.3084	111.641	120.223	54.5424	54.7679	49.4985	66.4545	70.1829	Down Regulated
ENSG00000054523	ENSG00000054523.17	KIF1B	10210570	10381603	1	mRNA	kinesin family member 1B [Source:HGNC Symbol;Acc:HGNC:16636]	2157.95	0.200985	0.0808978	0.00255944	0.0357792	3123	1370	1516	1726	1851	1821	2167	1833	1722.37	1442.9	1557.76	1711.64	1912.74	1877.85	1920.09	1891.84	Up Regulated
ENSG00000241859	ENSG00000241859.7	ANOS2P	13703902	13915824	1	mRNA	anosmin 2, pseudogene [Source:HGNC Symbol;Acc:HGNC:6214]	474.331	-0.242951	0.106781	0.00256982	0.0358998	1480	680	590	707	581	564	660	519	816.237	716.185	606.251	701.118	600.38	581.607	584.8	535.661	Down Regulated
ENSG00000197461	ENSG00000197461.13	PDGFA	497258	520296	-1	mRNA	platelet derived growth factor subunit A [Source:HGNC Symbol;Acc:HGNC:8799]	5503.18	0.345241	0.167876	0.00257585	0.0359592	5637	6436	4077	6417	6978	7066	7866	6289	3108.87	6778.48	4189.3	6363.61	7210.76	7286.59	6969.75	6490.89	Up Regulated
ENSG00000230330	ENSG00000230330.1	HMGN2P3	26032539	26032811	-1	mRNA	high mobility group nucleosomal binding domain 2 pseudogene 3 [Source:HGNC Symbol;Acc:HGNC:33566]	564.174	-0.299295	0.138245	0.00258836	0.0361091	1429	691	910	572	577	533	631	592	788.11	727.77	935.065	567.241	596.247	549.639	559.104	611.004	Down Regulated
ENSG00000120727	ENSG00000120727.13	PAIP2	139341587	139369720	1	mRNA	poly(A) binding protein interacting protein 2 [Source:HGNC Symbol;Acc:HGNC:17970]	658.288	0.210043	0.0859777	0.00259468	0.0361261	1045	639	599	709	725	694	925	740	576.329	673.003	615.499	703.101	749.183	715.665	819.606	763.755	Up Regulated
ENSG00000156711	ENSG00000156711.17	MAPK13	36127809	36144524	1	mRNA	mitogen-activated protein kinase 13 [Source:HGNC Symbol;Acc:HGNC:6875]	353.318	0.301601	0.140005	0.00259492	0.0361261	427	247	221	396	363	383	367	348	235.495	260.144	227.087	392.705	375.108	394.957	325.184	359.171	Up Regulated
ENSG00000270421	ENSG00000270421.1		63358745	63359104	1	mRNA	leucine rich repeat containing 40 (LRRC40) pseudogene	23.6675	-0.892794	0.500847	0.00261097	0.0363177	25	9	9	11	11	4	3	1	13.7878	9.47892	9.24789	10.9085	11.3669	4.12487	2.65818	1.0321	Down Regulated
ENSG00000126243	ENSG00000126243.8	LRFN3	35935358	35946624	1	mRNA	leucine rich repeat and fibronectin type III domain containing 3 [Source:HGNC Symbol;Acc:HGNC:28370]	136.783	0.401946	0.206574	0.00261595	0.0363177	159	62	80	103	118	119	137	122	87.6903	65.2992	82.2035	102.143	121.936	122.715	121.39	125.916	Up Regulated
ENSG00000141506	ENSG00000141506.13	PIK3R5	8878911	8965712	-1	mRNA	phosphoinositide-3-kinase regulatory subunit 5 [Source:HGNC Symbol;Acc:HGNC:30035]	914.559	0.293557	0.13505	0.00261629	0.0363177	1087	680	548	907	836	914	1036	846	599.493	716.185	563.094	899.454	863.886	942.534	917.958	873.158	Up Regulated
ENSG00000172159	ENSG00000172159.16	FRMD3	83242990	83538546	-1	mRNA	FERM domain containing 3 [Source:HGNC Symbol;Acc:HGNC:24125]	285.447	0.294054	0.135561	0.00261718	0.0363177	510	312	346	584	478	432	588	517	281.271	328.602	355.53	579.141	493.944	445.486	521.003	533.597	Up Regulated
ENSG00000215883	ENSG00000215883.10	CYB5RL	54169651	54200036	-1	mRNA	cytochrome b5 reductase like [Source:HGNC Symbol;Acc:HGNC:32220]	637.082	-0.217532	0.0882794	0.00261766	0.0363177	1329	631	749	643	576	536	638	617	732.958	664.577	769.63	637.65	595.213	552.733	565.306	636.807	Down Regulated
ENSG00000155254	ENSG00000155254.13	MARVELD1	97713173	97718150	1	mRNA	MARVEL domain containing 1 [Source:HGNC Symbol;Acc:HGNC:28674]	2191.63	0.266008	0.118129	0.00262074	0.0363177	2220	1574	1290	1713	1730	1769	2130	1876	1224.35	1657.76	1325.53	1698.75	1787.71	1824.23	1887.31	1936.22	Up Regulated
ENSG00000168310	ENSG00000168310.11	IRF2	184385702	184474558	-1	mRNA	interferon regulatory factor 2 [Source:HGNC Symbol;Acc:HGNC:6117]	938.84	0.225454	0.0946529	0.00262119	0.0363177	1280	998	851	1146	1196	1151	1185	1035	705.934	1051.11	874.44	1136.47	1235.89	1186.93	1049.98	1068.23	Up Regulated
ENSG00000179958	ENSG00000179958.8	DCTPP1	30423615	30430030	-1	mRNA	dCTP pyrophosphatase 1 [Source:HGNC Symbol;Acc:HGNC:28777]	347.804	-0.303812	0.141008	0.00262448	0.0363384	863	311	352	250	251	260	304	281	475.954	327.549	361.695	247.92	259.372	268.117	269.362	290.021	Down Regulated
ENSG00000187492	ENSG00000187492.9	CDHR4	49790732	49799873	-1	mRNA	cadherin related family member 4 [Source:HGNC Symbol;Acc:HGNC:34527]	30.6604	-0.510766	0.283355	0.00262963	0.0363407	188	56	107	43	51	48	37	59	103.684	58.9799	109.947	42.6422	52.7012	49.4985	32.7842	60.894	Down Regulated
ENSG00000198088	ENSG00000198088.10	NUP62CL	107123427	107206433	-1	mRNA	nucleoporin 62 C-terminal like [Source:HGNC Symbol;Acc:HGNC:25960]	31.4582	-1.2801	0.684307	0.00263001	0.0363407	27	2	8	2	3	4	1	1	14.8908	2.10643	8.22035	1.98336	3.10007	4.12487	0.88606	1.0321	Down Regulated
ENSG00000106992	ENSG00000106992.19	AK1	127866486	127877675	-1	mRNA	adenylate kinase 1 [Source:HGNC Symbol;Acc:HGNC:361]	81.8277	0.411521	0.214804	0.00263425	0.0363657	112	75	63	93	88	133	113	103	61.7693	78.991	64.7353	92.2262	90.9354	137.152	100.125	106.306	Up Regulated
ENSG00000105127	ENSG00000105127.9	AKAP8	15353385	15379815	-1	mRNA	A-kinase anchoring protein 8 [Source:HGNC Symbol;Acc:HGNC:378]	1561.2	0.179016	0.0700677	0.0026354	0.0363657	2258	1320	1310	1636	1610	1600	1795	1513	1245.31	1390.24	1346.08	1622.39	1663.7	1649.95	1590.48	1561.57	Up Regulated
ENSG00000183060	ENSG00000183060.15	LYSMD4	99715697	99733561	-1	mRNA	LysM domain containing 4 [Source:HGNC Symbol;Acc:HGNC:26571]	264.977	0.254581	0.111468	0.00263933	0.0363951	439	282	210	318	333	292	416	303	242.113	297.006	215.784	315.354	344.108	301.116	368.601	312.727	Up Regulated
ENSG00000139133	ENSG00000139133.7	ALG10	34022468	34029694	1	mRNA	ALG10 alpha-1,2-glucosyltransferase [Source:HGNC Symbol;Acc:HGNC:23162]	335.973	-0.277714	0.125235	0.00264593	0.0364615	809	391	417	362	326	280	393	308	446.173	411.806	428.486	358.988	336.874	288.741	348.222	317.887	Down Regulated
ENSG00000214283	ENSG00000214283.4	RAD51AP1P1	136899076	136900076	-1	mRNA	RAD51AP1 pseudogene 1 [Source:HGNC Symbol;Acc:HGNC:49646]	67.9899	-0.554464	0.296274	0.00265778	0.0365765	150	38	76	54	39	33	54	30	82.7267	40.0221	78.0933	53.5507	40.3009	34.0302	47.8472	30.963	Down Regulated
ENSG00000171208	ENSG00000171208.9	NETO2	47077703	47143945	-1	mRNA	neuropilin and tolloid like 2 [Source:HGNC Symbol;Acc:HGNC:14644]	1078.57	-0.240151	0.103051	0.00265788	0.0365765	2344	1162	1212	922	948	928	1011	952	1292.74	1223.83	1245.38	914.329	979.622	956.971	895.807	982.561	Down Regulated
ENSG00000119537	ENSG00000119537.17	KDSR	63327726	63367228	-1	mRNA	3-ketodihydrosphingosine reductase [Source:HGNC Symbol;Acc:HGNC:4021]	853.133	0.176288	0.068819	0.00267044	0.0367182	1312	705	704	775	855	816	936	828	723.583	742.515	723.391	768.552	883.52	841.474	829.352	854.58	Up Regulated
ENSG00000203747	ENSG00000203747.11	FCGR3A	161541759	161550737	-1	mRNA	Fc fragment of IgG receptor IIIa [Source:HGNC Symbol;Acc:HGNC:3619]	62.1233	-0.551902	0.315531	0.0026718	0.0367182	242	105	101	58	50	46	69	76	133.466	110.587	103.782	57.5174	51.6678	47.436	61.1381	78.4397	Down Regulated
ENSG00000197147	ENSG00000197147.13	LRRC8B	89524829	89597861	1	mRNA	leucine rich repeat containing 8 VRAC subunit B [Source:HGNC Symbol;Acc:HGNC:30692]	662.252	-0.250248	0.109205	0.0027003	0.0370606	1099	495	646	493	427	455	520	455	606.111	521.34	663.793	488.898	441.243	469.204	460.751	469.606	Down Regulated
ENSG00000100591	ENSG00000100591.8	AHSA1	77457870	77469472	1	mRNA	activator of HSP90 ATPase activity 1 [Source:HGNC Symbol;Acc:HGNC:1189]	1322.62	-0.200438	0.0812939	0.00270218	0.0370606	2595	1335	1317	1166	1029	1170	1259	1115	1431.17	1406.04	1353.28	1156.3	1063.32	1206.53	1115.55	1150.79	Down Regulated
ENSG00000005471	ENSG00000005471.17	ABCB4	87401696	87480435	-1	mRNA	ATP binding cassette subfamily B member 4 [Source:HGNC Symbol;Acc:HGNC:45]	1499.13	0.22751	0.0962576	0.00270743	0.0371075	2377	1676	1622	2364	2131	2037	2334	2137	1310.94	1765.18	1666.68	2344.33	2202.08	2100.59	2068.06	2205.6	Up Regulated
ENSG00000107371	ENSG00000107371.13	EXOSC3	37759234	37832117	-1	mRNA	exosome component 3 [Source:HGNC Symbol;Acc:HGNC:17944]	900.012	-0.187096	0.074362	0.00272039	0.03726	2214	997	983	1002	903	885	1054	874	1221.05	1050.05	1010.08	993.663	933.121	912.628	933.907	902.057	Down Regulated
ENSG00000202222	ENSG00000202222.1	Y_RNA	39881566	39881678	-1	mRNA	Y RNA [Source:RFAM;Acc:RF00019]	167.801	-0.42373	0.224919	0.00272523	0.0373012	339	137	234	139	132	113	111	122	186.962	144.29	240.445	137.844	136.403	116.528	98.3527	125.916	Down Regulated
[truncated: 343 more rows]

## Sheet: Differential lncRNA_Data S4b
ENSEMBL ID	ENSEMBL ID with Version	Gene name	Gene start(bp)	Gene end(bp)	Strand	Type	Gene Description	baseMean	log2FoldChange	lfcSE	pvalue	padj	Raw Mock1	Raw Mock2	Raw Mock3	Raw Mock4	Raw NMII_A	Raw NMII_B	Raw NMII_C	Raw NMII_D	Norm Mock1	Norm Mock2	Norm Mock3	Norm Mock4	Norm NMII_A	Norm NMII_B	Norm NMII_C	Norm NMII_D	Up/Down Regulation
[truncated: 161 more rows]

[truncated: 1 more sheets: DE lncRNA-mRNA pairs_Data S4c]
