# Supplementary material for: CYP1B1-AS1 regulates CYP1B1 to promote Coxiella burnetii pathogenesis by inhibiting ROS and host cell death.
Source: Research Square preprint supplement (doi:10.21203/rs.3.rs-5390645/v1), 2024-12-11
Supplement: Supplementary file 4 [file Data S5. Coding-Noncoding Network Analysis of CYP1B1-AS1, CYP1B1, lnc-DKK2, and DKK2.xlsx]

## Sheet: Sheet1
	CYP1B1-AS1 regulates CYP1B1 to promote Coxiella burnetii pathogenesis by inhibiting ROS and host cell death.
	Arunima et al. 2024
	Data S5. Coding-Noncoding Network Analysis of CYP1B1-AS1, CYP1B1, lnc-DKK2, and DKK2.

## Sheet: Common_(CYP1B1-AS1,CYP1B1)
ENSEMBL ID	ENSEMBL ID with Version	Gene name	Gene start(bp)	Gene end(bp)	Strand	Type	Description	baseMean	log2FoldChange	lfcSE	pvalue	padj	Raw Mock1	Raw Mock2	Raw Mock3	Raw Mock4	Raw NMII_A	Raw NMII_B	Raw NMII_C	Raw NMII_D	Norm Mock1	Norm Mock2	Norm Mock3	Norm Mock4	Norm NMII_A	Norm NMII_B	Norm NMII_C	Norm NMII_D	Up/Down Regulation
ENSG00000112312	ENSG00000112312.10	GMNN	24774931	24786099	1	Protein_Coding	geminin DNA replication inhibitor [Source:HGNC Symbol;Acc:HGNC:17493]	156.317	-0.835801	0.134428	1.87e-11	2.22e-07	467	207	247	148	124	94	137	127	257.556	218.015	253.803	146.769	128.136	96.9345	121.39	131.077	Down Regulated
ENSG00000176225	ENSG00000176225.13	RTTN	70003031	70205726	-1	Protein_Coding	rotatin [Source:HGNC Symbol;Acc:HGNC:18654]	868.971	-0.640859	0.102207	2.19e-11	2.22e-07	1733	789	1027	642	519	530	598	559	955.769	830.985	1055.29	636.659	536.312	546.546	529.864	576.945	Down Regulated
ENSG00000273703	ENSG00000273703.1	H2BC14	27815022	27815489	1	Protein_Coding	H2B clustered histone 14 [Source:HGNC Symbol;Acc:HGNC:4750]	945.552	-1.3331	0.217908	4.45e-11	3.01e-07	1500	1166	1338	473	373	283	424	411	827.267	1228.05	1374.85	469.065	385.442	291.835	375.689	424.194	Down Regulated
ENSG00000197153	ENSG00000197153.4	H3C12	27890315	27893106	-1	Protein_Coding	H3 clustered histone 12 [Source:HGNC Symbol;Acc:HGNC:4774]	579.489	-1.48583	0.248681	1.06e-10	4.92e-07	1288	822	1029	301	236	197	277	290	710.346	865.741	1057.34	298.496	243.872	203.15	245.439	299.309	Down Regulated
ENSG00000125810	ENSG00000125810.10	CD93	23079360	23086324	-1	Protein_Coding	CD93 molecule [Source:HGNC Symbol;Acc:HGNC:15855]	7398.59	0.474353	0.0786874	1.21e-10	4.92e-07	9878	6361	5620	9173	9510	9403	10400	9081	5447.83	6699.49	5774.8	9096.68	9827.22	9696.55	9215.03	9372.52	Up Regulated
ENSG00000122952	ENSG00000122952.17	ZWINT	56357227	56361273	-1	Protein_Coding	ZW10 interacting kinetochore protein [Source:HGNC Symbol;Acc:HGNC:13195]	1242.41	-0.766595	0.13005	2.04e-10	5.92e-07	2073	1037	1359	707	563	568	701	668	1143.28	1092.18	1396.43	701.118	581.78	585.732	621.128	689.444	Down Regulated
ENSG00000146918	ENSG00000146918.19	NCAPG2	158631169	158704804	-1	Protein_Coding	non-SMC condensin II complex subunit G2 [Source:HGNC Symbol;Acc:HGNC:21904]	1495.97	-0.615763	0.103977	2.41e-10	6.11e-07	3076	1593	2054	1196	1016	981	1192	1119	1696.45	1677.77	2110.57	1186.05	1049.89	1011.63	1056.18	1154.92	Down Regulated
ENSG00000149269	ENSG00000149269.9	PAK1	77322017	77474635	-1	Protein_Coding	p21 (RAC1) activated kinase 1 [Source:HGNC Symbol;Acc:HGNC:8590]	1836.3	-0.434543	0.0743111	4.01e-10	7.73e-07	4623	2160	2434	1670	1568	1594	1863	1591	2549.64	2274.94	2501.04	1656.11	1620.3	1643.76	1650.73	1642.07	Down Regulated
ENSG00000010278	ENSG00000010278.14	CD9	6199715	6238271	1	Protein_Coding	CD9 molecule [Source:HGNC Symbol;Acc:HGNC:1709]	1465.18	0.867165	0.150474	4.19e-10	7.73e-07	1295	1398	1087	2325	2462	2612	2992	2585	714.207	1472.39	1116.94	2305.66	2544.12	2693.54	2651.09	2667.98	Up Regulated
ENSG00000085840	ENSG00000085840.13	ORC1	52372829	52404423	-1	Protein_Coding	origin recognition complex subunit 1 [Source:HGNC Symbol;Acc:HGNC:8487]	1008.2	-0.727423	0.127475	6.41e-10	1.09e-06	2770	1165	1467	845	730	704	850	742	1527.69	1226.99	1507.41	837.97	754.35	725.978	753.151	765.819	Down Regulated
ENSG00000181938	ENSG00000181938.13	GINS3	58295080	58406147	1	Protein_Coding	GINS complex subunit 3 [Source:HGNC Symbol;Acc:HGNC:25851]	306.622	-0.617199	0.108424	7.57e-10	1.1e-06	801	376	443	280	235	227	292	259	441.76	396.008	455.202	277.67	242.839	234.087	258.73	267.314	Down Regulated
ENSG00000164070	ENSG00000164070.12	HSPA4L	127781821	127840733	1	Protein_Coding	heat shock protein family A (Hsp70) member 4 like [Source:HGNC Symbol;Acc:HGNC:17041]	582.748	-0.625998	0.110212	8.19e-10	1.1e-06	1274	561	704	439	354	397	430	387	702.625	590.852	723.391	435.348	365.808	409.394	381.006	399.423	Down Regulated
ENSG00000135931	ENSG00000135931.17	ARMC9	231198546	231376848	1	Protein_Coding	armadillo repeat containing 9 [Source:HGNC Symbol;Acc:HGNC:20730]	1277.33	0.773909	0.139799	1.62e-09	1.94e-06	1196	653	683	1663	1584	1609	1764	1607	659.607	687.748	701.812	1649.16	1636.84	1659.23	1563.01	1658.59	Up Regulated
ENSG00000165304	ENSG00000165304.8	MELK	36572862	36677683	1	Protein_Coding	maternal embryonic leucine zipper kinase [Source:HGNC Symbol;Acc:HGNC:16870]	672.764	-0.784655	0.143865	2.58e-09	2.76e-06	1426	826	1057	493	448	387	519	477	786.455	869.954	1086.11	488.898	462.944	399.081	459.865	492.312	Down Regulated
ENSG00000140525	ENSG00000140525.17	FANCI	89243945	89317261	1	Protein_Coding	FA complementation group I [Source:HGNC Symbol;Acc:HGNC:25568]	1336.4	-0.77602	0.143944	3.69e-09	3.75e-06	3075	1496	2053	915	846	770	994	973	1695.9	1575.61	2109.55	907.387	874.22	794.038	880.744	1004.23	Down Regulated
ENSG00000106462	ENSG00000106462.10	EZH2	148807257	148884321	-1	Protein_Coding	enhancer of zeste 2 polycomb repressive complex 2 subunit [Source:HGNC Symbol;Acc:HGNC:3527]	1055.36	-0.585565	0.108594	4.25e-09	3.95e-06	2096	1050	1420	788	704	721	811	716	1155.97	1105.87	1459.11	781.444	727.483	743.508	718.595	738.985	Down Regulated
ENSG00000120334	ENSG00000120334.15	CENPL	173799550	173824883	-1	Protein_Coding	centromere protein L [Source:HGNC Symbol;Acc:HGNC:17879]	671.19	-0.630087	0.117097	4.28e-09	3.95e-06	1309	843	1001	594	523	471	580	472	721.928	887.858	1028.57	589.058	540.445	485.704	513.915	487.152	Down Regulated
ENSG00000274267	ENSG00000274267.1		NA	NA	NA	Protein_Coding		2009.49	-1.22098	0.231978	6.49e-09	5.03e-06	4305	2639	3192	1257	895	909	1137	1024	2374.26	2779.43	3279.92	1246.54	924.854	937.377	1007.45	1056.87	Down Regulated
ENSG00000276410	ENSG00000276410.3	H2BC3	26043227	26043713	-1	Protein_Coding	H2B clustered histone 3 [Source:HGNC Symbol;Acc:HGNC:4751]	1005.65	-1.25105	0.237778	6.51e-09	5.03e-06	1931	1359	1739	611	481	436	504	529	1064.97	1431.32	1786.9	605.917	497.044	449.611	446.574	545.982	Down Regulated
ENSG00000181019	ENSG00000181019.13	NQO1	69706996	69726668	-1	Protein_Coding	NAD(P)H quinone dehydrogenase 1 [Source:HGNC Symbol;Acc:HGNC:2874]	3738.48	0.542282	0.102764	8.41e-09	6.1e-06	7154	3318	2975	6286	5828	6226	7194	5936	3945.51	3494.56	3056.94	6233.7	6022.4	6420.36	6374.32	6126.56	Up Regulated
ENSG00000144554	ENSG00000144554.10	FANCD2	10026370	10101932	1	Protein_Coding	FA complementation group D2 [Source:HGNC Symbol;Acc:HGNC:3585]	1250.31	-0.650016	0.124624	1.04e-08	7.07e-06	2734	1233	1702	952	876	739	959	861	1507.83	1298.61	1748.88	944.079	905.22	762.07	849.732	888.64	Down Regulated
ENSG00000197971	ENSG00000197971.15	MBP	76978827	77133683	-1	Protein_Coding	myelin basic protein [Source:HGNC Symbol;Acc:HGNC:6925]	9894.44	0.295692	0.0555089	1.26e-08	7.38e-06	15244	9351	8609	11831	11807	11404	13726	11669	8407.24	9848.59	8846.12	11732.6	12200.8	11760	12162.1	12043.6	Up Regulated
ENSG00000165029	ENSG00000165029.16	ABCA1	104781006	104928155	-1	Protein_Coding	ATP binding cassette subfamily A member 1 [Source:HGNC Symbol;Acc:HGNC:29]	5543.15	0.864466	0.167727	1.27e-08	7.38e-06	4327	3227	4056	8129	8124	8156	9746	8438	2386.39	3398.72	4167.72	8061.37	8394.99	8410.62	8635.54	8708.87	Up Regulated
ENSG00000143476	ENSG00000143476.18	DTL	212035553	212107400	1	Protein_Coding	denticleless E3 ubiquitin protein ligase homolog [Source:HGNC Symbol;Acc:HGNC:30288]	1757.11	-0.61278	0.118188	1.27e-08	7.38e-06	4173	1996	2564	1621	1298	1295	1523	1429	2301.46	2102.21	2634.62	1607.51	1341.3	1335.43	1349.47	1474.87	Down Regulated
ENSG00000117748	ENSG00000117748.10	RPA2	27891524	27914746	-1	Protein_Coding	replication protein A2 [Source:HGNC Symbol;Acc:HGNC:10290]	675.426	-0.483704	0.0931065	1.45e-08	7.77e-06	1921	894	953	751	652	571	731	682	1059.45	941.572	979.249	744.752	673.748	588.826	647.71	703.893	Down Regulated
ENSG00000083720	ENSG00000083720.13	OXCT1	41730065	41870425	-1	Protein_Coding	3-oxoacid CoA-transferase 1 [Source:HGNC Symbol;Acc:HGNC:8527]	656.785	-0.56632	0.109706	1.52e-08	7.94e-06	942	511	575	357	314	272	388	358	519.524	538.192	590.838	354.03	324.474	280.491	343.791	369.492	Down Regulated
ENSG00000130340	ENSG00000130340.15	SNX9	157700387	157945077	1	Protein_Coding	sorting nexin 9 [Source:HGNC Symbol;Acc:HGNC:14973]	2612.68	0.53146	0.103135	1.64e-08	8.23e-06	2660	1815	1460	2782	2680	2788	3169	2753	1467.02	1911.58	1500.21	2758.85	2769.4	2875.04	2807.92	2841.38	Up Regulated
ENSG00000174371	ENSG00000174371.17	EXO1	241847967	241895148	1	Protein_Coding	exonuclease 1 [Source:HGNC Symbol;Acc:HGNC:3511]	1151.69	-0.72581	0.141985	1.71e-08	8.23e-06	3388	1604	2057	1091	913	924	1113	1032	1868.52	1689.35	2113.66	1081.92	943.455	952.846	986.185	1065.13	Down Regulated
ENSG00000131981	ENSG00000131981.16	LGALS3	55124110	55145423	1	Protein_Coding	galectin 3 [Source:HGNC Symbol;Acc:HGNC:6563]	1473.91	0.473594	0.0919449	1.81e-08	8.34e-06	1847	1315	1188	1906	1858	1875	2164	1966	1018.64	1384.97	1220.72	1890.14	1919.98	1933.53	1917.43	2029.11	Up Regulated
ENSG00000149636	ENSG00000149636.15	DSN1	36751791	36773818	-1	Protein_Coding	DSN1 component of MIS12 kinetochore complex [Source:HGNC Symbol;Acc:HGNC:16165]	615.6	-0.553112	0.108666	2.24e-08	9.57e-06	1588	840	978	691	531	534	659	590	875.8	884.699	1004.94	685.251	548.712	550.671	583.914	608.94	Down Regulated
ENSG00000171848	ENSG00000171848.15	RRM2	10120698	10211725	1	Protein_Coding	ribonucleotide reductase regulatory subunit M2 [Source:HGNC Symbol;Acc:HGNC:10452]	1821.39	-0.882833	0.175101	2.27e-08	9.57e-06	4889	2224	3146	1310	1178	1054	1418	1367	2696.34	2342.35	3232.65	1299.1	1217.29	1086.9	1256.43	1410.88	Down Regulated
ENSG00000149548	ENSG00000149548.15	CCDC15	124954121	125041489	1	Protein_Coding	coiled-coil domain containing 15 [Source:HGNC Symbol;Acc:HGNC:25798]	285.49	-0.566226	0.11342	2.31e-08	9.57e-06	612	375	427	290	228	246	263	221	337.525	394.955	438.761	287.587	235.605	253.68	233.034	228.094	Down Regulated
ENSG00000102384	ENSG00000102384.13	CENPI	101098188	101166126	1	Protein_Coding	centromere protein I [Source:HGNC Symbol;Acc:HGNC:3968]	341.892	-0.737155	0.14602	2.37e-08	9.62e-06	748	407	510	249	245	206	260	230	412.53	428.658	524.047	246.928	253.172	212.431	230.376	237.383	Down Regulated
ENSG00000168913	ENSG00000168913.7	ENHO	34521043	34522990	-1	Protein_Coding	energy homeostasis associated [Source:HGNC Symbol;Acc:HGNC:24838]	33.4111	-2.0078	0.400922	2.49e-08	9.93e-06	283	87	103	21	19	28	21	17	156.078	91.6295	105.837	20.8253	19.6338	28.8741	18.6073	17.5457	Down Regulated
ENSG00000146670	ENSG00000146670.10	CDCA5	65066300	65084164	-1	Protein_Coding	cell division cycle associated 5 [Source:HGNC Symbol;Acc:HGNC:14626]	655.5	-0.836399	0.166585	2.57e-08	1e-05	1664	937	1235	611	487	451	562	547	917.715	986.86	1269.02	605.917	503.245	465.079	497.966	564.56	Down Regulated
ENSG00000137819	ENSG00000137819.13	PAQR5	69298912	69407780	1	Protein_Coding	progestin and adipoQ receptor family member 5 [Source:HGNC Symbol;Acc:HGNC:29645]	1716.01	0.649165	0.129106	2.77e-08	1.04e-05	2032	1272	1075	2291	2329	2290	2561	2325	1120.67	1339.69	1104.61	2271.94	2406.69	2361.49	2269.2	2399.64	Up Regulated
ENSG00000071539	ENSG00000071539.14	TRIP13	892884	919357	1	Protein_Coding	thyroid hormone receptor interactor 13 [Source:HGNC Symbol;Acc:HGNC:12307]	507.195	-0.659791	0.131528	2.96e-08	1.08e-05	797	431	508	273	257	224	300	263	439.554	453.935	521.992	270.729	265.573	230.993	265.818	271.443	Down Regulated
ENSG00000276180	ENSG00000276180.1	H4C9	27139282	27139678	1	Protein_Coding	H4 clustered histone 9 [Source:HGNC Symbol;Acc:HGNC:4793]	932.845	-1.05114	0.212426	3.48e-08	1.17e-05	1669	1263	1303	576	442	455	592	437	920.472	1330.21	1338.89	571.208	456.744	469.204	524.548	451.028	Down Regulated
ENSG00000176890	ENSG00000176890.16	TYMS	657653	673578	1	Protein_Coding	thymidylate synthetase [Source:HGNC Symbol;Acc:HGNC:12441]	197.878	-0.853479	0.172055	3.6e-08	1.17e-05	450	197	272	121	113	91	121	133	248.18	207.483	279.492	119.993	116.769	93.8409	107.213	137.27	Down Regulated
ENSG00000184445	ENSG00000184445.12	KNTC1	122527246	122626396	1	Protein_Coding	kinetochore associated 1 [Source:HGNC Symbol;Acc:HGNC:17255]	2392.06	-0.516121	0.103087	3.64e-08	1.17e-05	5647	2671	3466	2065	1982	1820	2184	1953	3114.38	2813.13	3561.47	2047.82	2048.11	1876.82	1935.16	2015.69	Down Regulated
ENSG00000227739	ENSG00000227739.10	TUBB	30710059	30715284	1	Protein_Coding	tubulin beta class I [Source:HGNC Symbol;Acc:HGNC:20778]	1088.42	-0.704918	0.141944	3.67e-08	1.17e-05	1755	1030	1201	595	568	512	647	589	967.902	1084.81	1234.08	590.05	586.947	527.984	573.281	607.908	Down Regulated
ENSG00000124575	ENSG00000124575.6	H1-3	26234212	26234987	-1	Protein_Coding	H1.3 linker histone, cluster member [Source:HGNC Symbol;Acc:HGNC:4717]	1883.59	-0.9865	0.199722	3.7e-08	1.17e-05	5323	3364	4073	1652	1370	1346	1628	1605	2935.69	3543.01	4185.19	1638.26	1415.7	1388.02	1442.51	1656.52	Down Regulated
ENSG00000198431	ENSG00000198431.16	TXNRD1	104215779	104350307	1	Protein_Coding	thioredoxin reductase 1 [Source:HGNC Symbol;Acc:HGNC:12437]	8242.6	0.446322	0.0888933	3.84e-08	1.2e-05	12808	6272	6246	10420	10132	10258	12071	10240	7063.76	6605.75	6418.04	10333.3	10470	10578.2	10695.6	10568.7	Up Regulated
ENSG00000172578	ENSG00000172578.12	KLHL6	183487551	183555706	-1	Protein_Coding	kelch like family member 6 [Source:HGNC Symbol;Acc:HGNC:18653]	1545.64	0.313459	0.0616004	4.09e-08	1.21e-05	2430	1349	1439	1917	1867	1962	2096	1844	1340.17	1420.78	1478.64	1901.05	1929.28	2023.25	1857.18	1903.2	Up Regulated
ENSG00000104738	ENSG00000104738.17	MCM4	47960185	47978160	1	Protein_Coding	minichromosome maintenance complex component 4 [Source:HGNC Symbol;Acc:HGNC:6947]	6156.44	-0.538711	0.108246	4.1e-08	1.21e-05	16216	7094	8692	5347	4794	4825	5821	5307	8943.31	7471.49	8931.41	5302.51	4953.91	4975.63	5157.76	5477.36	Down Regulated
ENSG00000138796	ENSG00000138796.16	HADH	107989714	108035241	1	Protein_Coding	hydroxyacyl-CoA dehydrogenase [Source:HGNC Symbol;Acc:HGNC:4799]	1588.13	-0.27914	0.0547411	4.7e-08	1.35e-05	3341	1778	2003	1586	1444	1484	1700	1414	1842.6	1872.61	2058.17	1572.8	1492.17	1530.33	1506.3	1459.39	Down Regulated
ENSG00000214018	ENSG00000214018.3	RRM2P3	44309314	44310476	-1	Protein_Coding	ribonucleotide reductase M2 polypeptide pseudogene 3 [Source:HGNC Symbol;Acc:HGNC:10455]	102.205	-0.955941	0.193111	5.19e-08	1.44e-05	284	130	176	81	72	50	80	76	156.629	136.918	180.848	80.3261	74.4017	51.5609	70.8848	78.4397	Down Regulated
ENSG00000198700	ENSG00000198700.10	IPO9	201829149	201884291	1	Protein_Coding	importin 9 [Source:HGNC Symbol;Acc:HGNC:19425]	3669.45	-0.247901	0.0484863	5.35e-08	1.47e-05	7248	3503	3886	3162	3050	3017	3392	3016	3997.35	3689.4	3993.03	3135.69	3151.74	3111.19	3005.52	3112.82	Down Regulated
ENSG00000275714	ENSG00000275714.1	H3C1	26020451	26020958	1	Protein_Coding	H3 clustered histone 1 [Source:HGNC Symbol;Acc:HGNC:4766]	268.214	-1.31813	0.272903	6.02e-08	1.57e-05	700	415	521	193	131	132	172	150	386.058	437.083	535.35	191.394	135.37	136.121	152.402	154.815	Down Regulated
ENSG00000159147	ENSG00000159147.18	DONSON	33559542	33588706	-1	Protein_Coding	DNA replication fork stabilization factor DONSON [Source:HGNC Symbol;Acc:HGNC:2993]	532.066	-0.550264	0.112483	6.29e-08	1.62e-05	1235	548	721	413	383	400	445	389	681.116	577.161	740.859	409.564	395.776	412.487	394.297	401.488	Down Regulated
ENSG00000114541	ENSG00000114541.15	FRMD4B	69168782	69542583	-1	Protein_Coding	FERM domain containing 4B [Source:HGNC Symbol;Acc:HGNC:24886]	1755.03	0.308941	0.0617859	6.58e-08	1.67e-05	2450	1558	1589	1914	2015	1977	2330	1912	1351.2	1640.91	1632.77	1898.08	2082.21	2038.72	2064.52	1973.38	Up Regulated
ENSG00000012048	ENSG00000012048.22	BRCA1	43044295	43170245	-1	Protein_Coding	BRCA1 DNA repair associated [Source:HGNC Symbol;Acc:HGNC:1100]	2384.02	-0.628158	0.12947	6.95e-08	1.74e-05	6145	2788	3855	1980	1883	1735	2155	1969	3389.04	2936.36	3961.18	1963.53	1945.81	1789.16	1909.46	2032.21	Down Regulated
ENSG00000111879	ENSG00000111879.19	FAM184A	118959763	119149387	-1	Protein_Coding	family with sequence similarity 184 member A [Source:HGNC Symbol;Acc:HGNC:20991]	269.766	-0.587433	0.120732	7.01e-08	1.74e-05	658	304	327	231	194	198	226	199	362.894	320.177	336.007	229.078	200.471	204.181	200.25	205.388	Down Regulated
ENSG00000275713	ENSG00000275713.2	H2BC9	26251614	26252075	1	Protein_Coding	H2B clustered histone 9 [Source:HGNC Symbol;Acc:HGNC:4755]	1284.06	-1.273	0.265898	7.43e-08	1.8e-05	2920	1994	2376	802	622	601	732	746	1610.41	2100.11	2441.44	795.327	642.748	619.762	648.596	769.948	Down Regulated
ENSG00000117632	ENSG00000117632.23	STMN1	25884181	25906991	-1	Protein_Coding	stathmin 1 [Source:HGNC Symbol;Acc:HGNC:6510]	3941.85	-0.701407	0.146222	8.58e-08	2e-05	9437	4561	6360	3072	2786	2571	3258	3093	5204.61	4803.7	6535.18	3046.44	2878.93	2651.26	2886.78	3192.29	Down Regulated
ENSG00000101868	ENSG00000101868.10	POLA1	24693873	24996986	1	Protein_Coding	DNA polymerase alpha 1, catalytic subunit [Source:HGNC Symbol;Acc:HGNC:9173]	1051.04	-0.51852	0.10829	1.09e-07	2.46e-05	2495	1208	1503	821	880	781	949	824	1376.02	1272.28	1544.4	814.169	909.354	805.381	840.871	850.452	Down Regulated
ENSG00000187741	ENSG00000187741.15	FANCA	89726683	89816977	-1	Protein_Coding	FA complementation group A [Source:HGNC Symbol;Acc:HGNC:3582]	650.328	-0.616194	0.129466	1.13e-07	2.52e-05	1400	570	726	434	399	353	443	431	772.116	600.331	745.997	430.389	412.309	364.02	392.525	444.836	Down Regulated
ENSG00000134779	ENSG00000134779.15	TPGS2	36777647	36829216	-1	Protein_Coding	tubulin polyglutamylase complex subunit 2 [Source:HGNC Symbol;Acc:HGNC:24561]	1968.13	-0.352166	0.0724684	1.15e-07	2.53e-05	5591	2570	3003	2348	2096	2138	2272	2192	3083.5	2706.76	3085.71	2328.46	2165.92	2204.74	2013.13	2262.37	Down Regulated
ENSG00000134830	ENSG00000134830.5	C5AR2	47332175	47347329	1	Protein_Coding	complement C5a receptor 2 [Source:HGNC Symbol;Acc:HGNC:4527]	2278.33	0.999096	0.213295	1.3e-07	2.79e-05	979	1383	798	2709	2689	3103	3316	2624	539.929	1456.59	819.98	2686.46	2778.7	3199.87	2938.18	2708.23	Up Regulated
ENSG00000097046	ENSG00000097046.13	CDC7	91500851	91525764	1	Protein_Coding	cell division cycle 7 [Source:HGNC Symbol;Acc:HGNC:1745]	553.773	-0.563366	0.118872	1.3e-07	2.79e-05	1219	614	771	463	429	352	479	444	672.292	646.673	792.236	459.148	443.31	362.989	424.423	458.253	Down Regulated
ENSG00000110090	ENSG00000110090.13	CPT1A	68754620	68844410	-1	Protein_Coding	carnitine palmitoyltransferase 1A [Source:HGNC Symbol;Acc:HGNC:2328]	1712.13	0.38818	0.0807712	1.33e-07	2.82e-05	2482	1044	990	1761	1694	1670	1924	1754	1368.85	1099.55	1017.27	1746.35	1750.51	1722.13	1704.78	1810.31	Up Regulated
ENSG00000134291	ENSG00000134291.12	TMEM106C	47963569	47968878	1	Protein_Coding	transmembrane protein 106C [Source:HGNC Symbol;Acc:HGNC:28775]	527.694	-0.816236	0.174182	1.37e-07	2.86e-05	1431	934	1174	546	488	463	519	453	789.213	983.701	1206.34	541.457	504.278	477.454	459.865	467.542	Down Regulated
ENSG00000159259	ENSG00000159259.8	CHAF1B	36385392	36419015	1	Protein_Coding	chromatin assembly factor 1 subunit B [Source:HGNC Symbol;Acc:HGNC:1911]	431.597	-0.593839	0.125829	1.39e-07	2.86e-05	1027	523	618	372	301	282	408	386	566.402	550.83	635.022	368.905	311.04	290.804	361.513	398.391	Down Regulated
ENSG00000185950	ENSG00000185950.9	IRS2	109752695	109786583	-1	Protein_Coding	insulin receptor substrate 2 [Source:HGNC Symbol;Acc:HGNC:6126]	2251.84	0.532599	0.112562	1.4e-07	2.86e-05	2213	1205	1156	1938	1833	2034	2595	1971	1220.49	1269.12	1187.84	1921.88	1894.14	2097.5	2299.33	2034.27	Up Regulated
ENSG00000111445	ENSG00000111445.14	RFC5	118013588	118033130	1	Protein_Coding	replication factor C subunit 5 [Source:HGNC Symbol;Acc:HGNC:9973]	526.479	-0.552481	0.117135	1.48e-07	2.98e-05	1582	700	865	476	459	477	498	547	872.491	737.249	888.825	472.04	474.311	491.891	441.258	564.56	Down Regulated
ENSG00000136824	ENSG00000136824.19	SMC2	104094260	104141419	1	Protein_Coding	structural maintenance of chromosomes 2 [Source:HGNC Symbol;Acc:HGNC:14011]	1693.35	-0.602502	0.129371	1.84e-07	3.5e-05	4107	2070	2691	1364	1334	1259	1452	1447	2265.06	2180.15	2765.12	1352.65	1378.5	1298.3	1286.56	1493.45	Down Regulated
ENSG00000140199	ENSG00000140199.11	SLC12A6	34229784	34338060	-1	Protein_Coding	solute carrier family 12 member 6 [Source:HGNC Symbol;Acc:HGNC:10914]	3634.17	0.420013	0.0890911	1.88e-07	3.53e-05	4090	3038	2808	4063	4155	4148	4633	4083	2255.68	3199.66	2885.34	4029.2	4293.6	4277.49	4105.12	4214.07	Up Regulated
ENSG00000124098	ENSG00000124098.10	FAM210B	56358974	56368663	1	Protein_Coding	family with sequence similarity 210 member B [Source:HGNC Symbol;Acc:HGNC:16102]	735.914	0.38655	0.0818007	1.93e-07	3.56e-05	1125	694	622	981	933	947	1141	952	620.45	730.93	639.132	972.838	964.122	976.564	1010.99	982.561	Up Regulated
ENSG00000132646	ENSG00000132646.11	PCNA	5114953	5126626	-1	Protein_Coding	proliferating cell nuclear antigen [Source:HGNC Symbol;Acc:HGNC:8729]	1024.03	-0.531968	0.114239	2.03e-07	3.68e-05	2904	1270	1586	1001	863	854	1068	990	1601.59	1337.58	1629.68	992.672	891.787	880.66	946.312	1021.78	Down Regulated
ENSG00000197061	ENSG00000197061.4	H4C3	26103933	26104337	1	Protein_Coding	H4 clustered histone 3 [Source:HGNC Symbol;Acc:HGNC:4787]	1120.5	-0.832336	0.181244	2.13e-07	3.79e-05	3025	2010	2461	1208	954	977	1101	1017	1668.32	2116.96	2528.78	1197.95	985.822	1007.5	975.552	1049.65	Down Regulated
ENSG00000156535	ENSG00000156535.15	CD109	73695785	73828316	1	Protein_Coding	CD109 molecule [Source:HGNC Symbol;Acc:HGNC:21685]	7529.6	0.578786	0.125016	2.15e-07	3.8e-05	8519	5845	5874	10687	10441	9969	11801	10529	4698.32	6156.03	6035.79	10598.1	10789.3	10280.2	10456.4	10867	Up Regulated
ENSG00000152495	ENSG00000152495.11	CAMK4	111223653	111494886	1	Protein_Coding	calcium/calmodulin dependent protein kinase IV [Source:HGNC Symbol;Acc:HGNC:1464]	268.268	-0.575195	0.125153	2.69e-07	4.61e-05	922	436	493	291	278	289	299	290	508.493	459.201	506.579	288.579	287.273	298.022	264.932	299.309	Down Regulated
ENSG00000054793	ENSG00000054793.13	ATP9A	51596514	51768390	-1	Protein_Coding	ATPase phospholipid transporting 9A (putative) [Source:HGNC Symbol;Acc:HGNC:13540]	3580.74	0.589051	0.128665	2.7e-07	4.61e-05	3104	2654	2331	4427	4272	4451	4793	4166	1711.89	2795.23	2395.2	4390.17	4414.5	4589.95	4246.89	4299.74	Up Regulated
ENSG00000101773	ENSG00000101773.19	RBBP8	22798261	23026488	1	Protein_Coding	RB binding protein 8, endonuclease [Source:HGNC Symbol;Acc:HGNC:9891]	585.219	-0.623755	0.136613	2.8e-07	4.72e-05	1751	808	999	586	534	469	607	555	965.696	850.996	1026.52	581.125	551.812	483.641	537.838	572.816	Down Regulated
ENSG00000273983	ENSG00000273983.1	H3C8	26270918	26271413	-1	Protein_Coding	H3 clustered histone 8 [Source:HGNC Symbol;Acc:HGNC:4772]	902.144	-1.23676	0.274482	2.87e-07	4.77e-05	1302	774	982	351	259	277	321	290	718.068	815.187	1009.05	348.08	267.639	285.647	284.425	299.309	Down Regulated
ENSG00000116830	ENSG00000116830.12	TTF2	117060326	117107453	1	Protein_Coding	transcription termination factor 2 [Source:HGNC Symbol;Acc:HGNC:12398]	1579.69	-0.46883	0.102159	3.08e-07	5.05e-05	3084	1872	2183	1365	1210	1192	1536	1235	1700.86	1971.61	2243.13	1353.64	1250.36	1229.21	1360.99	1274.65	Down Regulated
ENSG00000180113	ENSG00000180113.16	TDRD6	46687875	46704319	1	Protein_Coding	tudor domain containing 6 [Source:HGNC Symbol;Acc:HGNC:21339]	183.264	0.854145	0.189782	3.11e-07	5.06e-05	178	114	133	321	330	268	352	332	98.169	120.066	136.663	318.329	341.008	276.366	311.893	342.658	Up Regulated
ENSG00000000460	ENSG00000000460.17	C1orf112	169662007	169854080	1	Protein_Coding	chromosome 1 open reading frame 112 [Source:HGNC Symbol;Acc:HGNC:25565]	392.372	-0.512484	0.112241	3.25e-07	5.18e-05	940	429	545	352	311	299	361	323	518.421	451.828	560.011	349.071	321.374	308.334	319.868	333.369	Down Regulated
ENSG00000111554	ENSG00000111554.14	MDM1	68272443	68332381	-1	Protein_Coding	Mdm1 nuclear protein [Source:HGNC Symbol;Acc:HGNC:29917]	293.084	-0.546973	0.120602	3.57e-07	5.57e-05	797	380	451	261	251	251	284	261	439.554	400.221	463.422	258.828	259.372	258.836	251.641	269.379	Down Regulated
ENSG00000158373	ENSG00000158373.8	H2BC5	26158122	26171349	1	Protein_Coding	H2B clustered histone 5 [Source:HGNC Symbol;Acc:HGNC:4747]	1248	-0.96381	0.215768	3.64e-07	5.6e-05	3169	2085	2457	1000	799	875	1044	921	1747.74	2195.95	2524.67	991.68	825.652	902.316	925.047	950.566	Down Regulated
ENSG00000106399	ENSG00000106399.11	RPA3	7636518	7718607	-1	Protein_Coding	replication protein A3 [Source:HGNC Symbol;Acc:HGNC:10291]	344.87	-0.540431	0.119303	3.64e-07	5.6e-05	904	468	533	414	290	339	364	318	498.566	492.904	547.681	410.556	299.673	349.583	322.526	328.208	Down Regulated
ENSG00000094804	ENSG00000094804.11	CDC6	40287879	40304657	1	Protein_Coding	cell division cycle 6 [Source:HGNC Symbol;Acc:HGNC:1744]	1135.6	-0.558684	0.12363	3.74e-07	5.71e-05	3209	1384	1826	1024	1046	876	1100	1034	1769.8	1457.65	1876.29	1015.48	1080.89	903.347	974.666	1067.19	Down Regulated
ENSG00000176208	ENSG00000176208.9	ATAD5	30831966	30895869	1	Protein_Coding	ATPase family AAA domain containing 5 [Source:HGNC Symbol;Acc:HGNC:25752]	1116.72	-0.438624	0.0966073	4.16e-07	6.2e-05	2564	1225	1551	1050	970	884	1055	968	1414.07	1290.19	1593.72	1041.26	1002.36	911.597	934.793	999.074	Down Regulated
ENSG00000090863	ENSG00000090863.11	GLG1	74447427	74607144	-1	Protein_Coding	golgi glycoprotein 1 [Source:HGNC Symbol;Acc:HGNC:4316]	4171.44	0.244442	0.0519227	4.22e-07	6.2e-05	6122	3270	3366	3921	4108	4146	4704	4132	3376.35	3444.01	3458.71	3888.38	4245.03	4275.43	4168.03	4264.64	Up Regulated
ENSG00000273802	ENSG00000273802.2	H2BC8	26216200	26216688	-1	Protein_Coding	H2B clustered histone 8 [Source:HGNC Symbol;Acc:HGNC:4746]	1454.93	-0.935151	0.210919	4.27e-07	6.24e-05	3118	2196	2592	1061	887	914	1114	945	1719.61	2312.86	2663.39	1052.17	916.587	942.534	987.071	975.336	Down Regulated
ENSG00000074266	ENSG00000074266.20	EED	86244753	86278813	1	Protein_Coding	embryonic ectoderm development [Source:HGNC Symbol;Acc:HGNC:3188]	470.657	-0.43679	0.0962588	4.35e-07	6.31e-05	1133	472	579	412	382	358	437	377	624.862	497.116	594.948	408.572	394.742	369.176	387.208	389.102	Down Regulated
ENSG00000163508	ENSG00000163508.12	EOMES	27715949	27722711	-1	Protein_Coding	eomesodermin [Source:HGNC Symbol;Acc:HGNC:3372]	111.732	-0.779753	0.175351	4.44e-07	6.39e-05	205	143	152	60	67	67	85	49	113.06	150.609	156.187	59.5008	69.2349	69.0916	75.3151	50.573	Down Regulated
ENSG00000119714	ENSG00000119714.11	GPR68	91232532	91253925	-1	Protein_Coding	G protein-coupled receptor 68 [Source:HGNC Symbol;Acc:HGNC:4519]	531.124	0.867798	0.196379	4.61e-07	6.6e-05	356	265	201	485	520	572	652	512	196.338	279.101	206.536	480.965	537.345	589.857	577.711	528.436	Up Regulated
ENSG00000189362	ENSG00000189362.12	NEMP2	190504338	190534722	-1	Protein_Coding	nuclear envelope integral membrane protein 2 [Source:HGNC Symbol;Acc:HGNC:33700]	558.047	-0.460132	0.101056	4.86e-07	6.74e-05	1076	448	558	372	366	338	411	332	593.426	471.839	573.369	368.905	378.208	348.552	364.171	342.658	Down Regulated
ENSG00000008083	ENSG00000008083.14	JARID2	15246069	15522042	1	Protein_Coding	jumonji and AT-rich interaction domain containing 2 [Source:HGNC Symbol;Acc:HGNC:6196]	2028.84	0.37155	0.081819	4.88e-07	6.74e-05	1827	1245	1351	1692	1719	1734	1983	1707	1007.61	1311.25	1388.21	1677.92	1776.34	1788.13	1757.06	1761.8	Up Regulated
ENSG00000131389	ENSG00000131389.17	SLC6A6	14402576	14489349	1	Protein_Coding	solute carrier family 6 member 6 [Source:HGNC Symbol;Acc:HGNC:11052]	3397.66	0.449027	0.100243	5.37e-07	7.27e-05	5105	2574	2510	4087	4009	4346	4736	4077	2815.46	2710.97	2579.13	4053	4142.73	4481.67	4196.38	4207.88	Up Regulated
ENSG00000035862	ENSG00000035862.12	TIMP2	78852977	78925387	-1	Protein_Coding	TIMP metallopeptidase inhibitor 2 [Source:HGNC Symbol;Acc:HGNC:11821]	4044.32	0.295437	0.0644838	5.66e-07	7.55e-05	5614	3102	2908	3904	3826	3834	4531	4396	3096.18	3267.07	2988.1	3871.52	3953.62	3953.69	4014.74	4537.12	Up Regulated
ENSG00000189057	ENSG00000189057.11	FAM111B	59107185	59127412	1	Protein_Coding	FAM111 trypsin like peptidase B [Source:HGNC Symbol;Acc:HGNC:24200]	872.776	-0.776615	0.177458	5.95e-07	7.85e-05	3161	1343	1890	909	786	711	965	907	1743.33	1414.46	1942.06	901.437	812.218	733.196	855.048	936.116	Down Regulated
ENSG00000142856	ENSG00000142856.16	ITGB3BP	63440770	63593721	-1	Protein_Coding	integrin subunit beta 3 binding protein [Source:HGNC Symbol;Acc:HGNC:6157]	375.237	-0.591901	0.13474	6.43e-07	8.27e-05	859	421	574	308	291	251	343	287	473.748	443.403	589.81	305.437	300.707	258.836	303.919	296.213	Down Regulated
ENSG00000093009	ENSG00000093009.9	CDC45	19479457	19520612	1	Protein_Coding	cell division cycle 45 [Source:HGNC Symbol;Acc:HGNC:1739]	371.629	-0.703018	0.160962	6.59e-07	8.36e-05	1142	453	546	302	251	272	322	324	629.826	477.105	561.039	299.487	259.372	280.491	285.311	334.401	Down Regulated
ENSG00000272899	ENSG00000272899.4	ATP6V1FNB	128866330	128872047	1	Protein_Coding	ATP6V1F neighbor [Source:HGNC Symbol;Acc:HGNC:52392]	177.653	0.848338	0.195835	6.63e-07	8.36e-05	139	117	130	255	276	276	306	255	76.6601	123.226	133.581	252.878	285.206	284.616	271.134	263.186	Up Regulated
ENSG00000166845	ENSG00000166845.15	C18orf54	54357906	54385218	1	Protein_Coding	chromosome 18 open reading frame 54 [Source:HGNC Symbol;Acc:HGNC:13796]	251.189	-0.638719	0.144668	6.63e-07	8.36e-05	452	251	254	164	158	109	160	159	249.283	264.356	260.996	162.636	163.27	112.403	141.77	164.104	Down Regulated
ENSG00000168883	ENSG00000168883.20	USP39	85602856	85649283	1	Protein_Coding	ubiquitin specific peptidase 39 [Source:HGNC Symbol;Acc:HGNC:20071]	981.352	-0.251681	0.0547515	6.99e-07	8.73e-05	2173	1068	1143	971	877	879	1094	902	1198.43	1124.83	1174.48	962.921	906.254	906.441	969.35	930.956	Down Regulated
ENSG00000101407	ENSG00000101407.13	TTI1	37983007	38033461	-1	Protein_Coding	TELO2 interacting protein 1 [Source:HGNC Symbol;Acc:HGNC:29029]	1106.29	-0.274003	0.060611	7.05e-07	8.74e-05	2121	1224	1231	1048	946	969	1026	964	1169.76	1289.13	1264.91	1039.28	977.555	999.251	909.098	994.946	Down Regulated
ENSG00000167325	ENSG00000167325.15	RRM1	4094707	4138932	1	Protein_Coding	ribonucleotide reductase catalytic subunit M1 [Source:HGNC Symbol;Acc:HGNC:10451]	2501.88	-0.543724	0.124306	7.36e-07	9.07e-05	6404	3162	4055	2251	2156	1998	2489	2235	3531.88	3330.26	4166.69	2232.27	2227.92	2060.37	2205.4	2306.75	Down Regulated
ENSG00000127589	ENSG00000127589.4	TUBBP1	30351873	30353518	1	Protein_Coding	tubulin beta pseudogene 1 [Source:HGNC Symbol;Acc:HGNC:12414]	1075.86	-0.657841	0.151983	7.97e-07	9.64e-05	1770	966	1233	627	571	581	612	609	976.175	1017.4	1266.96	621.783	590.047	599.138	542.269	628.55	Down Regulated
ENSG00000132002	ENSG00000132002.8	DNAJB1	14514769	14560391	-1	Protein_Coding	DnaJ heat shock protein family (Hsp40) member B1 [Source:HGNC Symbol;Acc:HGNC:5270]	1629.22	-0.468068	0.106771	8.04e-07	9.66e-05	3186	1535	1462	1133	1042	1055	1116	1037	1757.11	1616.68	1502.27	1123.57	1076.76	1087.94	988.843	1070.29	Down Regulated
ENSG00000139112	ENSG00000139112.11	GABARAPL1	10212458	10223128	1	Protein_Coding	GABA type A receptor associated protein like 1 [Source:HGNC Symbol;Acc:HGNC:4068]	760.766	0.401813	0.0916104	9.14e-07	0.00010797	1421	847	822	1208	1215	1251	1372	1218	783.697	892.071	844.641	1197.95	1255.53	1290.05	1215.67	1257.1	Up Regulated
ENSG00000077152	ENSG00000077152.10	UBE2T	202331657	202341980	-1	Protein_Coding	ubiquitin conjugating enzyme E2 T [Source:HGNC Symbol;Acc:HGNC:25009]	383.218	-0.625513	0.145349	9.23e-07	0.000108342	888	478	574	295	284	259	335	301	489.742	503.436	589.81	292.546	293.473	267.086	296.83	310.663	Down Regulated
ENSG00000186480	ENSG00000186480.13	INSIG1	155297776	155310235	1	Protein_Coding	insulin induced gene 1 [Source:HGNC Symbol;Acc:HGNC:6083]	3960.91	0.628218	0.14623	9.41e-07	0.000109237	3351	2839	2774	4469	4564	5005	5529	4574	1848.11	2990.07	2850.41	4431.82	4716.24	5161.25	4899.03	4720.83	Up Regulated
ENSG00000153823	ENSG00000153823.18	PID1	228850526	229271287	-1	Protein_Coding	phosphotyrosine interaction domain containing 1 [Source:HGNC Symbol;Acc:HGNC:26084]	51.3722	0.804102	0.188363	9.57e-07	0.000110443	93	44	48	78	91	89	114	121	51.2905	46.3414	49.3221	77.351	94.0354	91.7784	101.011	124.884	Up Regulated
ENSG00000107798	ENSG00000107798.18	LIPA	89213569	89414557	-1	Protein_Coding	lipase A, lysosomal acid type [Source:HGNC Symbol;Acc:HGNC:6617]	16880	0.550083	0.12812	1.04e-06	0.000118614	18024	14037	13011	21207	20996	21440	25544	22492	9940.44	14783.9	13369.4	21030.6	21696.4	22109.3	22633.5	23214	Up Regulated
ENSG00000116237	ENSG00000116237.16	ICMT	6221193	6235972	-1	Protein_Coding	isoprenylcysteine carboxyl methyltransferase [Source:HGNC Symbol;Acc:HGNC:5350]	3349.54	-0.361113	0.0825873	1.12e-06	0.000125267	6730	3524	3934	2873	2614	2661	2991	2738	3711.67	3711.52	4042.36	2849.1	2701.19	2744.07	2650.21	2825.89	Down Regulated
ENSG00000168496	ENSG00000168496.4	FEN1	61792911	61797238	1	Protein_Coding	flap structure-specific endonuclease 1 [Source:HGNC Symbol;Acc:HGNC:3650]	1554.97	-0.5599	0.13147	1.2e-06	0.000133614	4002	2024	2536	1339	1231	1287	1537	1407	2207.15	2131.7	2605.85	1327.86	1272.06	1327.18	1361.87	1452.17	Down Regulated
ENSG00000164463	ENSG00000164463.12	CREBRF	173056352	173139284	1	Protein_Coding	CREB3 regulatory factor [Source:HGNC Symbol;Acc:HGNC:24050]	1485.54	0.373963	0.0864572	1.31e-06	0.00014221	1953	1203	1330	1631	1736	1739	1939	1684	1077.1	1267.02	1366.63	1617.43	1793.91	1793.29	1718.07	1738.06	Up Regulated
ENSG00000148019	ENSG00000148019.13	CEP78	78236062	78279690	1	Protein_Coding	centrosomal protein 78 [Source:HGNC Symbol;Acc:HGNC:25740]	992.794	-0.462047	0.108396	1.39e-06	0.000148683	2805	1371	1728	1002	1104	969	1105	916	1546.99	1443.95	1775.6	993.663	1140.83	999.251	979.096	945.405	Down Regulated
ENSG00000142230	ENSG00000142230.11	SAE1	47113274	47210636	1	Protein_Coding	SUMO1 activating enzyme subunit 1 [Source:HGNC Symbol;Acc:HGNC:30660]	1681.33	-0.366099	0.0850502	1.5e-06	0.000158295	3607	1836	2124	1610	1444	1414	1616	1423	1989.3	1933.7	2182.5	1596.6	1492.17	1458.14	1431.87	1468.68	Down Regulated
ENSG00000197702	ENSG00000197702.13	PARVA	12377563	12535356	1	Protein_Coding	parvin alpha [Source:HGNC Symbol;Acc:HGNC:14652]	936.629	0.279119	0.0636258	1.51e-06	0.000158424	1294	710	717	974	921	985	1053	953	713.656	747.781	736.749	965.896	951.721	1015.75	933.021	983.593	Up Regulated
ENSG00000159212	ENSG00000159212.12	CLIC6	34668994	34718227	1	Protein_Coding	chloride intracellular channel 6 [Source:HGNC Symbol;Acc:HGNC:2065]	97.6913	0.814385	0.196566	1.53e-06	0.000159881	99	76	82	159	152	181	209	157	54.5996	80.0442	84.2586	157.677	157.07	186.651	185.187	162.04	Up Regulated
ENSG00000156398	ENSG00000156398.13	SFXN2	102714538	102743492	1	Protein_Coding	sideroflexin 2 [Source:HGNC Symbol;Acc:HGNC:16086]	212.264	-0.559349	0.132732	1.54e-06	0.000159881	396	175	192	120	111	114	120	133	218.398	184.312	197.288	119.002	114.703	117.559	106.327	137.27	Down Regulated
ENSG00000174080	ENSG00000174080.11	CTSF	66563464	66568879	-1	Protein_Coding	cathepsin F [Source:HGNC Symbol;Acc:HGNC:2531]	103.766	0.927664	0.223678	1.57e-06	0.000161817	68	62	55	111	144	127	149	121	37.5028	65.2992	56.5149	110.076	148.803	130.965	132.023	124.884	Up Regulated
ENSG00000149554	ENSG00000149554.12	CHEK1	125625163	125676255	1	Protein_Coding	checkpoint kinase 1 [Source:HGNC Symbol;Acc:HGNC:1925]	740.409	-0.485514	0.115255	1.67e-06	0.00017051	1711	725	971	566	558	529	658	542	943.636	763.579	997.745	561.291	576.613	545.514	583.028	559.399	Down Regulated
ENSG00000131470	ENSG00000131470.14	PSMC3IP	42572310	42577831	-1	Protein_Coding	PSMC3 interacting protein [Source:HGNC Symbol;Acc:HGNC:17928]	106.53	-0.642343	0.154498	1.71e-06	0.000174098	347	147	190	118	93	91	111	114	191.374	154.822	195.233	117.018	96.1022	93.8409	98.3527	117.66	Down Regulated
ENSG00000286169	ENSG00000286169.1		NA	NA	NA	Protein_Coding		3467.69	0.421432	0.0996019	1.74e-06	0.000175429	3449	1820	1784	2646	2775	2739	3238	2730	1902.16	1916.85	1833.14	2623.99	2867.56	2824.51	2869.06	2817.64	Up Regulated
ENSG00000160213	ENSG00000160213.7	CSTB	43772511	43776330	-1	Protein_Coding	cystatin B [Source:HGNC Symbol;Acc:HGNC:2482]	3071.5	0.404143	0.0954331	1.79e-06	0.000179409	3884	2694	2453	3888	3383	3587	4674	3930	2142.07	2837.36	2520.56	3855.65	3495.85	3698.98	4141.44	4056.16	Up Regulated
ENSG00000116729	ENSG00000116729.14	WLS	68098473	68233120	-1	Protein_Coding	Wnt ligand secretion mediator [Source:HGNC Symbol;Acc:HGNC:30238]	251.033	-0.47884	0.114491	1.81e-06	0.00017992	828	425	488	291	277	271	340	302	456.651	447.615	501.441	288.579	286.24	279.46	301.26	311.695	Down Regulated
ENSG00000164045	ENSG00000164045.11	CDC25A	48157146	48188417	-1	Protein_Coding	cell division cycle 25A [Source:HGNC Symbol;Acc:HGNC:1725]	600.544	-0.633065	0.153363	1.97e-06	0.00019443	1721	750	887	454	438	422	547	527	949.151	789.91	911.431	450.223	452.61	435.174	484.675	543.918	Down Regulated
ENSG00000107863	ENSG00000107863.18	ARHGAP21	24583609	24723887	-1	Protein_Coding	Rho GTPase activating protein 21 [Source:HGNC Symbol;Acc:HGNC:23725]	1502.7	-0.327406	0.0767397	2.08e-06	0.000202436	1757	892	975	752	687	688	809	704	969.005	939.466	1001.86	745.743	709.916	709.478	716.823	726.6	Down Regulated
ENSG00000278463	ENSG00000278463.1	H2AC4	26033092	26033618	-1	Protein_Coding	H2A clustered histone 4 [Source:HGNC Symbol;Acc:HGNC:4734]	341.625	-1.19334	0.294288	2.1e-06	0.000202675	866	576	696	222	177	192	248	201	477.609	606.651	715.17	220.153	182.904	197.994	219.743	207.452	Down Regulated
ENSG00000126775	ENSG00000126775.8	ATG14	55366391	55411830	-1	Protein_Coding	autophagy related 14 [Source:HGNC Symbol;Acc:HGNC:19962]	805.484	0.312495	0.0732197	2.2e-06	0.000211889	1151	695	656	911	926	864	1092	862	634.789	731.983	674.069	903.421	956.888	890.973	967.578	889.672	Up Regulated
ENSG00000100629	ENSG00000100629.17	CEP128	80476983	80959517	-1	Protein_Coding	centrosomal protein 128 [Source:HGNC Symbol;Acc:HGNC:20359]	466.62	-0.467609	0.112976	2.38e-06	0.000225827	787	385	469	290	245	293	320	282	434.039	405.487	481.918	287.587	253.172	302.147	283.539	291.053	Down Regulated
ENSG00000276043	ENSG00000276043.5	UHRF1	4903080	4962154	1	Protein_Coding	ubiquitin like with PHD and ring finger domains 1 [Source:HGNC Symbol;Acc:HGNC:12556]	886.966	-0.531118	0.129522	2.5e-06	0.00023585	2194	980	1132	634	594	650	792	687	1210.02	1032.15	1163.18	628.725	613.814	670.292	701.76	709.054	Down Regulated
ENSG00000278637	ENSG00000278637.1	H4C1	26021649	26022050	1	Protein_Coding	H4 clustered histone 1 [Source:HGNC Symbol;Acc:HGNC:4781]	593.162	-1.09837	0.273463	2.51e-06	0.000235907	1126	621	859	268	225	221	306	301	621.002	654.045	882.66	265.77	232.505	227.899	271.134	310.663	Down Regulated
ENSG00000117139	ENSG00000117139.17	KDM5B	202724495	202808487	-1	Protein_Coding	lysine demethylase 5B [Source:HGNC Symbol;Acc:HGNC:18039]	2539.33	0.342308	0.0819157	2.81e-06	0.000261374	2588	1601	1532	2225	2172	2145	2462	2203	1427.31	1686.19	1574.2	2206.49	2244.45	2211.96	2181.48	2273.72	Up Regulated
ENSG00000095951	ENSG00000095951.17	HIVEP1	12008762	12164999	1	Protein_Coding	HIVEP zinc finger 1 [Source:HGNC Symbol;Acc:HGNC:4920]	668.618	0.571863	0.140977	2.82e-06	0.000261374	902	393	430	782	777	812	961	778	497.463	413.913	441.844	775.494	802.918	837.349	851.504	802.975	Up Regulated
ENSG00000123374	ENSG00000123374.11	CDK2	55966781	55972789	1	Protein_Coding	cyclin dependent kinase 2 [Source:HGNC Symbol;Acc:HGNC:1771]	772.465	-0.506309	0.124158	2.84e-06	0.000262435	1755	915	995	577	578	565	670	606	967.902	963.69	1022.41	572.199	597.28	582.638	593.66	625.454	Down Regulated
ENSG00000174442	ENSG00000174442.12	ZWILCH	66504959	66550130	1	Protein_Coding	zwilch kinetochore protein [Source:HGNC Symbol;Acc:HGNC:25468]	481.581	-0.526562	0.129517	2.92e-06	0.000266058	1364	603	730	464	477	371	512	399	752.261	635.087	750.107	460.14	492.911	382.582	453.663	411.809	Down Regulated
ENSG00000182944	ENSG00000182944.17	EWSR1	29268009	29300525	1	Protein_Coding	EWS RNA binding protein 1 [Source:HGNC Symbol;Acc:HGNC:3508]	5842.64	0.195574	0.0446705	2.94e-06	0.000266665	9942	5042	5510	6243	6362	6506	7076	6393	5483.12	5310.3	5661.77	6191.06	6574.21	6709.11	6269.76	6598.23	Up Regulated
ENSG00000146070	ENSG00000146070.16	PLA2G7	46704201	46735693	-1	Protein_Coding	phospholipase A2 group VII [Source:HGNC Symbol;Acc:HGNC:9040]	345.7	0.795288	0.19887	2.96e-06	0.000267473	418	205	270	605	521	561	776	608	230.532	215.909	277.437	599.966	538.379	578.513	687.583	627.518	Up Regulated
ENSG00000115414	ENSG00000115414.19	FN1	215360440	215436073	-1	Protein_Coding	fibronectin 1 [Source:HGNC Symbol;Acc:HGNC:3778]	4848.7	-0.996158	0.250296	2.98e-06	0.000267956	4152	2057	1939	783	745	893	912	833	2289.87	2166.46	1992.41	776.485	769.851	920.878	808.087	859.741	Down Regulated
ENSG00000129484	ENSG00000129484.13	PARP2	20343615	20357904	1	Protein_Coding	poly(ADP-ribose) polymerase 2 [Source:HGNC Symbol;Acc:HGNC:272]	361.474	-0.404712	0.0981568	2.99e-06	0.000267956	909	418	480	339	308	306	392	316	501.324	440.243	493.221	336.18	318.274	315.553	347.336	326.144	Down Regulated
ENSG00000184357	ENSG00000184357.4	H1-5	27866792	27867588	-1	Protein_Coding	H1.5 linker histone, cluster member [Source:HGNC Symbol;Acc:HGNC:4719]	3398.93	-1.1196	0.282014	3.01e-06	0.000268104	9917	6183	7927	2796	2272	2223	2736	2526	5469.34	6512.02	8145.34	2772.74	2347.79	2292.4	2424.26	2607.09	Down Regulated
ENSG00000145604	ENSG00000145604.15	SKP2	36151989	36196849	1	Protein_Coding	S-phase kinase associated protein 2 [Source:HGNC Symbol;Acc:HGNC:10901]	1273.87	-0.36525	0.0881509	3.03e-06	0.000268104	2181	1187	1319	965	885	852	998	909	1202.85	1250.16	1355.33	956.971	914.521	878.598	884.288	938.18	Down Regulated
ENSG00000278705	ENSG00000278705.1	H4C2	26026896	26027283	-1	Protein_Coding	H4 clustered histone 2 [Source:HGNC Symbol;Acc:HGNC:4789]	761.3	-1.01064	0.254543	3.09e-06	0.000271123	1517	1049	1276	513	386	417	483	456	836.643	1104.82	1311.15	508.732	398.876	430.018	427.967	470.638	Down Regulated
ENSG00000205856	ENSG00000205856.4	C22orf42	32149006	32159322	-1	Protein_Coding	chromosome 22 open reading frame 42 [Source:HGNC Symbol;Acc:HGNC:27160]	57.5362	1.04757	0.263893	3.1e-06	0.000271123	39	16	23	46	55	54	61	70	21.5089	16.8514	23.6335	45.6173	56.8346	55.6858	54.0497	72.2471	Up Regulated
ENSG00000151012	ENSG00000151012.13	SLC7A11	138164097	138242349	-1	Protein_Coding	solute carrier family 7 member 11 [Source:HGNC Symbol;Acc:HGNC:11059]	2649.65	1.23864	0.313172	3.13e-06	0.000272939	1191	331	406	2504	2384	2374	3042	2456	656.85	348.613	417.183	2483.17	2463.52	2448.11	2695.39	2534.84	Up Regulated
ENSG00000101361	ENSG00000101361.17	NOP56	2652593	2658393	1	Protein_Coding	NOP56 ribonucleoprotein [Source:HGNC Symbol;Acc:HGNC:15911]	1105.94	-0.295894	0.0704136	3.22e-06	0.00027931	2660	1207	1290	1074	974	1007	1131	1040	1467.02	1271.23	1325.53	1065.06	1006.49	1038.44	1002.13	1073.39	Down Regulated
ENSG00000154920	ENSG00000154920.14	EME1	50373220	50381483	1	Protein_Coding	essential meiotic structure-specific endonuclease 1 [Source:HGNC Symbol;Acc:HGNC:24965]	217.65	-0.441558	0.110467	3.43e-06	0.000293718	450	262	306	185	174	183	193	180	248.18	275.942	314.428	183.461	179.804	188.713	171.01	185.778	Down Regulated
ENSG00000172292	ENSG00000172292.14	CERS6	168456249	168775134	1	Protein_Coding	ceramide synthase 6 [Source:HGNC Symbol;Acc:HGNC:23826]	2786.08	-0.301532	0.0721938	3.45e-06	0.000294659	5224	2689	2894	2186	2099	1999	2502	2141	2881.09	2832.09	2973.71	2167.81	2169.02	2061.41	2216.92	2209.73	Down Regulated
ENSG00000203814	ENSG00000203814.6	H2BC18	149782689	149812373	-1	Protein_Coding	H2B clustered histone 18 [Source:HGNC Symbol;Acc:HGNC:24700]	4076.13	-1.01914	0.258806	3.52e-06	0.000297769	7805	5700	6704	2757	2054	2097	2690	2342	4304.54	6003.31	6888.65	2734.06	2122.51	2162.46	2383.5	2417.18	Down Regulated
ENSG00000136982	ENSG00000136982.6	DSCC1	119833976	119855894	-1	Protein_Coding	DNA replication and sister chromatid cohesion 1 [Source:HGNC Symbol;Acc:HGNC:24453]	321.91	-0.566399	0.14144	3.58e-06	0.000302003	1018	416	536	322	301	276	344	305	561.438	438.137	550.763	319.321	311.04	284.616	304.805	314.791	Down Regulated
ENSG00000132383	ENSG00000132383.11	RPA1	1829702	1900082	1	Protein_Coding	replication protein A1 [Source:HGNC Symbol;Acc:HGNC:10289]	580.712	-0.448006	0.111382	4.04e-06	0.000333527	1318	626	713	536	397	439	553	516	726.892	659.311	732.639	531.541	410.243	452.705	489.991	532.564	Down Regulated
ENSG00000096433	ENSG00000096433.11	ITPR3	33620365	33696574	1	Protein_Coding	inositol 1,4,5-trisphosphate receptor type 3 [Source:HGNC Symbol;Acc:HGNC:6182]	256.013	-0.876406	0.223778	4.08e-06	0.000335229	483	251	251	148	121	106	120	132	266.38	264.356	257.913	146.769	125.036	109.309	106.327	136.237	Down Regulated
ENSG00000071242	ENSG00000071242.12	RPS6KA2	166409364	166906451	-1	Protein_Coding	ribosomal protein S6 kinase A2 [Source:HGNC Symbol;Acc:HGNC:10431]	3929.1	0.517072	0.129786	4.09e-06	0.000335326	3581	2196	2039	3695	3457	3803	4039	3729	1974.96	2312.86	2095.16	3664.26	3572.31	3921.72	3578.8	3848.71	Up Regulated
ENSG00000158169	ENSG00000158169.13	FANCC	95099054	95426796	-1	Protein_Coding	FA complementation group C [Source:HGNC Symbol;Acc:HGNC:3584]	369.339	-0.420118	0.104016	4.21e-06	0.000342376	587	300	359	264	239	206	264	223	323.737	315.964	368.888	261.804	246.972	212.431	233.92	230.159	Down Regulated
ENSG00000153071	ENSG00000153071.15	DAB2	39371675	39462300	-1	Protein_Coding	DAB adaptor protein 2 [Source:HGNC Symbol;Acc:HGNC:2662]	5408.15	0.331347	0.0811142	4.41e-06	0.000354976	6397	4479	4317	5646	5795	5749	6539	5579	3528.02	4717.34	4435.91	5599.03	5988.3	5928.47	5793.95	5758.1	Up Regulated
ENSG00000100441	ENSG00000100441.10	KHNYN	24429286	24441843	1	Protein_Coding	KH and NYN domain containing [Source:HGNC Symbol;Acc:HGNC:20166]	2595.34	0.282493	0.0682539	4.45e-06	0.000356187	3511	2137	2097	2618	2672	2711	3100	2648	1936.36	2250.72	2154.76	2596.22	2761.13	2795.63	2746.79	2733.01	Up Regulated
ENSG00000276368	ENSG00000276368.1	H2AC14	27814302	27814777	-1	Protein_Coding	H2A clustered histone 14 [Source:HGNC Symbol;Acc:HGNC:4727]	451.939	-1.09422	0.284246	4.91e-06	0.000381883	1339	907	1085	414	289	328	399	377	738.474	955.264	1114.88	410.556	298.64	338.24	353.538	389.102	Down Regulated
ENSG00000140455	ENSG00000140455.17	USP3	63504511	63594640	1	Protein_Coding	ubiquitin specific peptidase 3 [Source:HGNC Symbol;Acc:HGNC:12626]	1633.77	0.290364	0.0707657	4.93e-06	0.000381883	2184	1467	1344	1823	1803	1753	2048	1824	1204.5	1545.06	1381.02	1807.83	1863.14	1807.73	1814.65	1882.55	Up Regulated
ENSG00000226564	ENSG00000226564.1	FTH1P20	180872867	180873414	-1	Protein_Coding	ferritin heavy chain 1 pseudogene 20 [Source:HGNC Symbol;Acc:HGNC:37639]	1664.13	0.369545	0.0919799	5.06e-06	0.00039062	2230	1174	1053	1663	1665	1688	1909	1676	1229.87	1236.47	1082	1649.16	1720.54	1740.7	1691.49	1729.8	Up Regulated
ENSG00000123095	ENSG00000123095.6	BHLHE41	26120030	26125037	-1	Protein_Coding	basic helix-loop-helix family member e41 [Source:HGNC Symbol;Acc:HGNC:16617]	211.371	0.945611	0.247244	5.49e-06	0.000422197	118	98	89	185	229	221	279	197	65.0783	103.215	91.4514	183.461	236.639	227.899	247.211	203.324	Up Regulated
ENSG00000047365	ENSG00000047365.12	ARAP2	35948221	36244514	-1	Protein_Coding	ArfGAP with RhoGAP domain, ankyrin repeat and PH domain 2 [Source:HGNC Symbol;Acc:HGNC:16924]	104.531	-0.705948	0.182349	5.54e-06	0.000422197	223	143	158	79	73	74	94	60	122.987	150.609	162.352	78.3427	75.435	76.3102	83.2897	61.9261	Down Regulated
ENSG00000066427	ENSG00000066427.22	ATXN3	92044496	92106621	-1	Protein_Coding	ataxin 3 [Source:HGNC Symbol;Acc:HGNC:7106]	1086.54	0.328256	0.0814309	5.54e-06	0.000422197	1554	994	966	1311	1344	1282	1497	1287	857.048	1046.89	992.607	1300.09	1388.83	1322.02	1326.43	1328.31	Up Regulated
ENSG00000131873	ENSG00000131873.7	CHSY1	101175727	101252048	-1	Protein_Coding	chondroitin sulfate synthase 1 [Source:HGNC Symbol;Acc:HGNC:17198]	5551.96	0.264262	0.0642297	5.55e-06	0.000422197	6958	3854	3832	5023	4967	4944	5771	4991	3837.41	4059.08	3937.55	4981.21	5132.68	5098.34	5113.45	5151.22	Up Regulated
ENSG00000185697	ENSG00000185697.16	MYBL1	66562175	66614247	-1	Protein_Coding	MYB proto-oncogene like 1 [Source:HGNC Symbol;Acc:HGNC:7547]	304.346	-0.596254	0.154018	5.87e-06	0.000441405	827	470	542	296	281	227	358	286	456.1	495.01	556.929	293.537	290.373	234.087	317.21	295.181	Down Regulated
ENSG00000150907	ENSG00000150907.8	FOXO1	40555667	40666641	-1	Protein_Coding	forkhead box O1 [Source:HGNC Symbol;Acc:HGNC:3819]	439.568	0.33805	0.0847707	6.46e-06	0.000475461	523	262	263	357	366	364	446	374	288.44	275.942	270.244	354.03	378.208	375.363	395.183	386.006	Up Regulated
ENSG00000143319	ENSG00000143319.16	ISG20L2	156721891	156728766	-1	Protein_Coding	interferon stimulated exonuclease gene 20 like 2 [Source:HGNC Symbol;Acc:HGNC:25745]	1852.09	-0.26124	0.0639679	6.51e-06	0.000475725	3877	1853	2021	1611	1585	1466	1775	1618	2138.21	1951.6	2076.67	1597.6	1637.87	1511.77	1572.76	1669.94	Down Regulated
ENSG00000275379	ENSG00000275379.1	H3C11	27871845	27872346	-1	Protein_Coding	H3 clustered histone 11 [Source:HGNC Symbol;Acc:HGNC:4771]	451.437	-0.983853	0.259775	6.51e-06	0.000475725	1119	581	658	266	195	217	354	263	617.141	611.917	676.124	263.787	201.505	223.774	313.665	271.443	Down Regulated
ENSG00000188042	ENSG00000188042.8	ARL4C	234493041	234497081	-1	Protein_Coding	ADP ribosylation factor like GTPase 4C [Source:HGNC Symbol;Acc:HGNC:698]	1231.38	0.47347	0.1222	6.92e-06	0.000503456	2197	1231	1218	1724	1786	1966	2212	1970	1211.67	1296.51	1251.55	1709.66	1845.57	2027.38	1959.96	2033.24	Up Regulated
ENSG00000101670	ENSG00000101670.12	LIPG	49560699	49599185	1	Protein_Coding	lipase G, endothelial type [Source:HGNC Symbol;Acc:HGNC:6623]	1333.88	-0.617033	0.161502	6.97e-06	0.000505219	6752	3237	2861	1842	1698	1837	2021	1889	3723.8	3409.25	2939.8	1826.67	1754.64	1894.35	1790.73	1949.64	Down Regulated
ENSG00000123427	ENSG00000123427.17	EEF1AKMT3	57771492	57782541	1	Protein_Coding	EEF1A lysine methyltransferase 3 [Source:HGNC Symbol;Acc:HGNC:24936]	337.616	0.359949	0.0932389	6.99e-06	0.000505219	598	320	271	411	443	447	502	413	329.804	337.028	278.464	407.58	457.777	460.955	444.802	426.258	Up Regulated
ENSG00000163918	ENSG00000163918.10	RFC4	186789880	186807058	-1	Protein_Coding	replication factor C subunit 4 [Source:HGNC Symbol;Acc:HGNC:9972]	763.798	-0.448396	0.11558	7.2e-06	0.000517048	2253	1032	1144	738	719	685	841	788	1242.55	1086.92	1175.51	731.86	742.983	706.385	745.177	813.296	Down Regulated
ENSG00000109854	ENSG00000109854.13	HTATIP2	20363685	20383782	1	Protein_Coding	HIV-1 Tat interactive protein 2 [Source:HGNC Symbol;Acc:HGNC:16637]	1019.17	0.280905	0.0700379	7.7e-06	0.000549185	1774	1091	964	1344	1323	1310	1622	1290	978.381	1149.06	990.552	1332.82	1367.13	1350.9	1437.19	1331.41	Up Regulated
ENSG00000115687	ENSG00000115687.13	PASK	241106099	241150264	-1	Protein_Coding	PAS domain containing serine/threonine kinase [Source:HGNC Symbol;Acc:HGNC:17270]	503.059	-0.555429	0.145771	7.87e-06	0.000556714	972	463	587	335	276	333	350	328	536.069	487.638	603.168	332.213	285.206	343.396	310.121	338.529	Down Regulated
ENSG00000198901	ENSG00000198901.14	PRC1	90966040	90995629	-1	Protein_Coding	protein regulator of cytokinesis 1 [Source:HGNC Symbol;Acc:HGNC:9341]	88.6346	-0.62818	0.165927	8.28e-06	0.00057975	151	89	108	69	46	59	68	47	83.2782	93.7359	110.975	68.4259	47.5344	60.8419	60.2521	48.5088	Down Regulated
ENSG00000123096	ENSG00000123096.11	SSPN	26121991	26299290	1	Protein_Coding	sarcospan [Source:HGNC Symbol;Acc:HGNC:11322]	71.0444	0.645008	0.171376	8.55e-06	0.000595069	141	70	54	133	139	127	173	125	77.7631	73.7249	55.4874	131.893	143.637	130.965	153.288	129.013	Up Regulated
ENSG00000085733	ENSG00000085733.16	CTTN	70398404	70436584	1	Protein_Coding	cortactin [Source:HGNC Symbol;Acc:HGNC:3338]	446.903	0.732264	0.196518	8.96e-06	0.000614739	231	180	159	328	351	351	415	313	127.399	189.578	163.379	325.271	362.708	361.958	367.715	323.048	Up Regulated
ENSG00000166037	ENSG00000166037.11	CEP57	95789965	95832693	1	Protein_Coding	centrosomal protein 57 [Source:HGNC Symbol;Acc:HGNC:30794]	1408.74	-0.306155	0.0777069	9.12e-06	0.000621829	3145	1591	1796	1390	1364	1231	1458	1251	1734.5	1675.66	1845.47	1378.44	1409.5	1269.43	1291.88	1291.16	Down Regulated
ENSG00000183850	ENSG00000183850.14	ZNF730	23075210	23147221	1	Protein_Coding	zinc finger protein 730 [Source:HGNC Symbol;Acc:HGNC:32470]	187.234	-0.550378	0.145827	9.16e-06	0.00062194	366	202	242	161	121	132	156	133	201.853	212.749	248.666	159.66	125.036	136.121	138.225	137.27	Down Regulated
ENSG00000136273	ENSG00000136273.13	HUS1	47963288	47979615	-1	Protein_Coding	HUS1 checkpoint clamp component [Source:HGNC Symbol;Acc:HGNC:5309]	937.175	0.228894	0.0565192	9.21e-06	0.000623419	1507	868	907	1076	1077	1027	1208	1146	831.127	914.189	931.982	1067.05	1112.92	1059.06	1070.36	1182.79	Up Regulated
ENSG00000124942	ENSG00000124942.14	AHNAK	62433542	62556235	-1	Protein_Coding	AHNAK nucleoprotein [Source:HGNC Symbol;Acc:HGNC:347]	60575.2	0.393922	0.102383	9.36e-06	0.000631375	71702	45754	52724	71260	68938	71014	79258	70638	39544.5	48188.7	54176.2	70667.1	71237.5	73230.9	70227.4	72905.6	Up Regulated
ENSG00000073464	ENSG00000073464.12	CLCN4	10156975	10237660	1	Protein_Coding	chloride voltage-gated channel 4 [Source:HGNC Symbol;Acc:HGNC:2022]	563.779	0.450378	0.118437	9.53e-06	0.000637713	1029	677	631	1021	1047	987	1099	1045	567.505	713.025	648.38	1012.51	1081.92	1017.81	973.78	1078.55	Up Regulated
ENSG00000256029	ENSG00000256029.6		159834474	159873053	-1	Protein_Coding	novel protein	58.9984	0.947504	0.258472	9.55e-06	0.000637713	29	32	26	67	76	83	64	68	15.9938	33.7028	26.7161	66.4426	78.5351	85.5911	56.7078	70.1829	Up Regulated
ENSG00000172167	ENSG00000172167.8	MTBP	120445400	120542133	1	Protein_Coding	MDM2 binding protein [Source:HGNC Symbol;Acc:HGNC:7417]	474.214	-0.439146	0.115634	1.02e-05	0.000669747	935	481	605	374	353	323	420	355	515.663	506.595	621.664	370.888	364.775	333.084	372.145	366.396	Down Regulated
ENSG00000107957	ENSG00000107957.16	SH3PXD2A	103594027	103855584	-1	Protein_Coding	SH3 and PX domains 2A [Source:HGNC Symbol;Acc:HGNC:23664]	1279.69	0.34293	0.0886824	1.04e-05	0.000679581	1147	472	608	730	800	771	899	782	632.583	497.116	624.747	723.926	826.685	795.069	796.568	807.103	Up Regulated
ENSG00000183337	ENSG00000183337.16	BCOR	40049815	40177329	-1	Protein_Coding	BCL6 corepressor [Source:HGNC Symbol;Acc:HGNC:20893]	3161.15	0.414795	0.109163	1.06e-05	0.000688934	2841	2044	1725	2582	2577	2738	3039	2801	1566.84	2152.77	1772.51	2560.52	2662.96	2823.48	2692.74	2890.92	Up Regulated
ENSG00000213967	ENSG00000213967.10	ZNF726	23914876	23945159	1	Protein_Coding	zinc finger protein 726 [Source:HGNC Symbol;Acc:HGNC:32462]	66.2778	-0.738073	0.198986	1.07e-05	0.000690617	109	63	71	37	32	31	38	33	60.1147	66.3524	72.9556	36.6922	33.0674	31.9678	33.6703	34.0594	Down Regulated
ENSG00000136231	ENSG00000136231.14	IGF2BP3	23310209	23470491	-1	Protein_Coding	insulin like growth factor 2 mRNA binding protein 3 [Source:HGNC Symbol;Acc:HGNC:28868]	68.4607	-0.716797	0.19402	1.12e-05	0.000718397	237	97	97	68	58	66	55	54	130.708	102.162	99.6717	67.4342	59.9347	68.0604	48.7333	55.7335	Down Regulated
ENSG00000119801	ENSG00000119801.13	YPEL5	30146941	30160533	1	Protein_Coding	yippee like 5 [Source:HGNC Symbol;Acc:HGNC:18329]	1285.01	0.296678	0.0761926	1.15e-05	0.000733509	2175	1221	1226	1563	1713	1540	1855	1574	1199.54	1285.97	1259.77	1550	1770.14	1588.08	1643.64	1624.53	Up Regulated
ENSG00000113569	ENSG00000113569.16	NUP155	37288137	37371106	-1	Protein_Coding	nucleoporin 155 [Source:HGNC Symbol;Acc:HGNC:8063]	3972.66	-0.307902	0.0793267	1.15e-05	0.000733509	6668	3030	3442	2636	2527	2402	2917	2554	3677.48	3191.24	3536.81	2614.07	2611.29	2476.99	2584.64	2635.99	Down Regulated
ENSG00000089916	ENSG00000089916.17	GPATCH2L	76151916	76254342	1	Protein_Coding	G-patch domain containing 2 like [Source:HGNC Symbol;Acc:HGNC:20210]	5348.09	0.267235	0.0680575	1.19e-05	0.000756016	6890	4022	4215	5293	5358	5137	5996	5233	3799.91	4236.02	4331.1	5248.96	5536.72	5297.37	5312.82	5400.99	Up Regulated
ENSG00000093000	ENSG00000093000.19	NUP50	45163925	45188017	1	Protein_Coding	nucleoporin 50 [Source:HGNC Symbol;Acc:HGNC:8065]	2647.79	-0.280151	0.0708224	1.2e-05	0.000760565	5781	2665	3060	2217	2252	2123	2564	2340	3188.29	2806.81	3144.28	2198.55	2327.12	2189.28	2271.86	2415.12	Down Regulated
ENSG00000078269	ENSG00000078269.15	SYNJ2	157981863	158099176	1	Protein_Coding	synaptojanin 2 [Source:HGNC Symbol;Acc:HGNC:11504]	3146.53	0.380677	0.100661	1.26e-05	0.000795242	3609	2310	1917	3310	3124	3267	3585	3084	1990.4	2432.92	1969.8	3282.46	3228.21	3368.99	3176.53	3183	Up Regulated
ENSG00000151725	ENSG00000151725.12	CENPU	184694085	184734130	-1	Protein_Coding	centromere protein U [Source:HGNC Symbol;Acc:HGNC:21348]	599.343	-0.515425	0.139257	1.27e-05	0.00079526	1535	838	981	581	559	464	630	588	846.57	882.592	1008.02	576.166	577.646	478.485	558.218	606.876	Down Regulated
ENSG00000282226	ENSG00000282226.1		135676	149167	-1	Protein_Coding	novel transcript	29.1416	0.781945	0.215703	1.27e-05	0.00079526	38	32	23	52	63	52	68	51	20.9574	33.7028	23.6335	51.5674	65.1015	53.6234	60.2521	52.6372	Up Regulated
ENSG00000147475	ENSG00000147475.15	ERLIN2	37736601	37758422	1	Protein_Coding	ER lipid raft associated 2 [Source:HGNC Symbol;Acc:HGNC:1356]	6633.81	0.219773	0.0551844	1.34e-05	0.00082422	11674	6689	6161	7746	8142	7638	9055	7841	6438.34	7044.94	6330.7	7681.55	8413.59	7876.45	8023.27	8092.71	Up Regulated
ENSG00000054118	ENSG00000054118.15	THRAP3	36224432	36305357	1	Protein_Coding	thyroid hormone receptor associated protein 3 [Source:HGNC Symbol;Acc:HGNC:22964]	5203.19	0.178063	0.0438762	1.41e-05	0.000863403	8707	4579	4829	5476	5530	5635	6290	5551	4802.01	4822.66	4962.01	5430.44	5714.46	5810.91	5573.32	5729.2	Up Regulated
ENSG00000138439	ENSG00000138439.12	FAM117B	202634969	202769757	1	Protein_Coding	family with sequence similarity 117 member B [Source:HGNC Symbol;Acc:HGNC:14440]	254.149	0.411209	0.110466	1.43e-05	0.000870106	283	157	165	207	213	236	267	243	156.078	165.354	169.545	205.278	220.105	243.368	236.578	250.801	Up Regulated
ENSG00000178726	ENSG00000178726.6	THBD	23045633	23049672	-1	Protein_Coding	thrombomodulin [Source:HGNC Symbol;Acc:HGNC:11784]	1817.49	0.50247	0.136814	1.45e-05	0.000876925	2195	732	835	1637	1579	1569	1900	1616	1210.57	770.952	857.999	1623.38	1631.67	1617.98	1683.51	1667.88	Up Regulated
ENSG00000197299	ENSG00000197299.12	BLM	90717346	90816166	1	Protein_Coding	BLM RecQ like helicase [Source:HGNC Symbol;Acc:HGNC:1058]	1002.43	-0.489478	0.133172	1.46e-05	0.00088338	2187	1072	1337	812	793	686	862	773	1206.16	1129.04	1373.83	805.244	819.452	707.416	763.784	797.815	Down Regulated
ENSG00000114739	ENSG00000114739.14	ACVR2B	38453890	38493142	1	Protein_Coding	activin A receptor type 2B [Source:HGNC Symbol;Acc:HGNC:174]	671.027	0.336976	0.089413	1.54e-05	0.000930378	740	395	433	602	603	568	691	568	408.118	416.019	444.926	596.991	623.114	585.732	612.268	586.234	Up Regulated
ENSG00000232187	ENSG00000232187.1	FTH1P7	22696023	22696574	-1	Protein_Coding	ferritin heavy chain 1 pseudogene 7 [Source:HGNC Symbol;Acc:HGNC:3994]	3721.39	0.442001	0.120427	1.64e-05	0.000971402	4014	2634	2358	3184	3346	3618	4241	3815	2213.77	2774.16	2422.95	3157.51	3457.61	3730.95	3757.78	3937.47	Up Regulated
ENSG00000203760	ENSG00000203760.8	CENPW	126340115	126348875	1	Protein_Coding	centromere protein W [Source:HGNC Symbol;Acc:HGNC:21488]	350.604	-0.461075	0.126409	1.73e-05	0.00100541	734	364	471	282	256	252	317	271	404.809	383.369	483.973	279.654	264.539	259.867	280.881	279.7	Down Regulated
ENSG00000137145	ENSG00000137145.20	DENND4C	19230435	19374281	1	Protein_Coding	DENN domain containing 4C [Source:HGNC Symbol;Acc:HGNC:26079]	3787.21	0.325512	0.0866936	1.73e-05	0.00100541	5901	4118	4123	5736	5764	5348	6204	5326	3254.47	4337.13	4236.56	5688.28	5956.27	5514.96	5497.12	5496.97	Up Regulated
ENSG00000076242	ENSG00000076242.14	MLH1	36993350	37050846	1	Protein_Coding	mutL homolog 1 [Source:HGNC Symbol;Acc:HGNC:7127]	1235.43	-0.219353	0.0559205	1.73e-05	0.00100541	2803	1387	1505	1287	1225	1133	1455	1190	1545.89	1460.81	1546.45	1276.29	1265.86	1168.37	1289.22	1228.2	Down Regulated
ENSG00000155465	ENSG00000155465.18	SLC7A7	22773222	22829820	-1	Protein_Coding	solute carrier family 7 member 7 [Source:HGNC Symbol;Acc:HGNC:11065]	3277.11	-0.32986	0.0879549	1.74e-05	0.00100541	9926	4840	4469	3646	3528	3560	4041	3578	5474.3	5097.55	4592.09	3615.67	3645.68	3671.14	3580.57	3692.86	Down Regulated
ENSG00000137767	ENSG00000137767.14	SQOR	45631148	45691281	1	Protein_Coding	sulfide quinone oxidoreductase [Source:HGNC Symbol;Acc:HGNC:20390]	2060.2	0.332868	0.0890893	1.8e-05	0.00103155	2975	1703	1496	2287	2167	2224	2764	2287	1640.75	1793.62	1537.21	2267.97	2239.28	2293.43	2449.07	2360.42	Up Regulated
ENSG00000173209	ENSG00000173209.23	AHSA2P	61177418	61191203	1	Protein_Coding	activator of HSP90 ATPase homolog 2, pseudogene [Source:HGNC Symbol;Acc:HGNC:20437]	1333.01	0.207948	0.0529363	1.84e-05	0.00104788	2095	1040	1195	1385	1401	1348	1584	1377	1155.42	1095.34	1227.91	1373.48	1447.73	1390.08	1403.52	1421.2	Up Regulated
ENSG00000196787	ENSG00000196787.3	H2AC11	27133043	27133535	1	Protein_Coding	H2A clustered histone 11 [Source:HGNC Symbol;Acc:HGNC:4737]	1448.23	-0.914854	0.261163	1.92e-05	0.00108276	3789	2566	3050	1305	1015	1055	1323	1137	2089.68	2702.54	3134.01	1294.14	1048.86	1087.94	1172.26	1173.5	Down Regulated
ENSG00000179796	ENSG00000179796.12	LRRC3B	26622806	26717537	1	Protein_Coding	leucine rich repeat containing 3B [Source:HGNC Symbol;Acc:HGNC:28105]	443.367	0.621198	0.175431	1.95e-05	0.00109522	235	157	212	354	348	347	383	329	129.605	165.354	217.839	351.055	359.608	357.833	339.361	339.561	Up Regulated
ENSG00000180596	ENSG00000180596.7	H2BC4	26114873	26123926	-1	Protein_Coding	H2B clustered histone 4 [Source:HGNC Symbol;Acc:HGNC:4757]	1705.35	-0.80896	0.231282	2.05e-05	0.00113945	3834	2669	3039	1415	1158	1191	1443	1252	2114.49	2811.03	3122.71	1403.23	1196.63	1228.18	1278.58	1292.19	Down Regulated
ENSG00000268758	ENSG00000268758.7	ADGRE4P	6952500	6997872	-1	Protein_Coding	adhesion G protein-coupled receptor E4, pseudogene [Source:HGNC Symbol;Acc:HGNC:19240]	800.561	0.371827	0.101701	2.08e-05	0.00115232	1113	754	796	1123	1109	1087	1255	1024	613.832	794.123	817.925	1113.66	1145.99	1120.93	1112.01	1056.87	Up Regulated
ENSG00000278828	ENSG00000278828.1	H3C10	27810051	27811300	1	Protein_Coding	H3 clustered histone 10 [Source:HGNC Symbol;Acc:HGNC:4775]	1145.12	-1.1794	0.342737	2.23e-05	0.00121512	2299	1448	1946	659	472	484	676	537	1267.92	1525.05	1999.6	653.517	487.744	499.11	598.977	554.239	Down Regulated
ENSG00000255112	ENSG00000255112.2	CHMP1B	11851413	11854444	1	Protein_Coding	charged multivesicular body protein 1B [Source:HGNC Symbol;Acc:HGNC:24287]	1607.91	0.239533	0.0627241	2.23e-05	0.00121569	2978	1410	1524	1908	1887	1979	2166	1926	1642.4	1485.03	1565.98	1892.13	1949.94	2040.78	1919.21	1987.83	Up Regulated
ENSG00000163406	ENSG00000163406.11	SLC15A2	121894401	121944188	1	Protein_Coding	solute carrier family 15 member 2 [Source:HGNC Symbol;Acc:HGNC:10921]	387.267	-0.500082	0.140706	2.26e-05	0.00122931	469	263	304	190	184	155	191	176	258.659	276.995	312.373	188.419	190.138	159.839	169.237	181.65	Down Regulated
ENSG00000206053	ENSG00000206053.13	JPT2	1678256	1702280	1	Protein_Coding	Jupiter microtubule associated homolog 2 [Source:HGNC Symbol;Acc:HGNC:14137]	1539.45	-0.288491	0.0773257	2.31e-05	0.00124819	3155	1572	1630	1271	1185	1249	1428	1266	1740.02	1655.65	1674.9	1260.43	1224.53	1287.99	1265.29	1306.64	Down Regulated
ENSG00000134853	ENSG00000134853.12	PDGFRA	54229280	54298245	1	Protein_Coding	platelet derived growth factor receptor alpha [Source:HGNC Symbol;Acc:HGNC:8803]	261.592	0.833666	0.241713	2.37e-05	0.00126581	207	254	154	363	444	431	474	395	114.163	267.516	158.242	359.98	458.81	444.455	419.992	407.68	Up Regulated
ENSG00000184678	ENSG00000184678.10	H2BC21	149884459	149886682	-1	Protein_Coding	H2B clustered histone 21 [Source:HGNC Symbol;Acc:HGNC:4760]	4571.15	-0.758786	0.218973	2.37e-05	0.00126581	7370	5544	5998	3019	2296	2547	2993	2733	4064.64	5839.01	6163.21	2993.88	2372.59	2626.51	2651.98	2820.73	Down Regulated
ENSG00000178202	ENSG00000178202.13	POGLUT3	108472112	108498384	-1	Protein_Coding	protein O-glucosyltransferase 3 [Source:HGNC Symbol;Acc:HGNC:28496]	852.708	-0.393992	0.109409	2.42e-05	0.00128597	2061	990	1176	846	816	761	806	750	1136.66	1042.68	1208.39	838.961	843.219	784.757	714.164	774.076	Down Regulated
ENSG00000274997	ENSG00000274997.1	H2AC12	27147106	27147562	1	Protein_Coding	H2A clustered histone 12 [Source:HGNC Symbol;Acc:HGNC:13671]	961.471	-1.00177	0.292363	2.45e-05	0.00129463	2457	1661	2021	774	648	644	743	676	1355.06	1749.39	2076.67	767.56	669.615	664.105	658.343	697.701	Down Regulated
ENSG00000143622	ENSG00000143622.11	RIT1	155897808	155911404	-1	Protein_Coding	Ras like without CAAX 1 [Source:HGNC Symbol;Acc:HGNC:10023]	1851.87	0.357786	0.0988139	2.54e-05	0.00133536	3539	1905	1706	2772	2820	2637	3055	2730	1951.8	2006.37	1752.99	2748.94	2914.07	2719.32	2706.91	2817.64	Up Regulated
ENSG00000169116	ENSG00000169116.11	PARM1	74933095	75050115	1	Protein_Coding	prostate androgen-regulated mucin-like protein 1 [Source:HGNC Symbol;Acc:HGNC:24536]	857.831	-0.634214	0.182683	2.56e-05	0.0013406	1597	871	601	428	434	446	477	382	880.763	917.348	617.554	424.439	448.477	459.923	422.651	394.263	Down Regulated
ENSG00000102024	ENSG00000102024.18	PLS3	115561174	115650861	1	Protein_Coding	plastin 3 [Source:HGNC Symbol;Acc:HGNC:9091]	202.217	0.784689	0.229754	2.57e-05	0.00134345	17	20	21	52	46	45	41	49	9.37569	21.0643	21.5784	51.5674	47.5344	46.4048	36.3285	50.573	Up Regulated
ENSG00000112851	ENSG00000112851.14	ERBIN	65926556	66082546	1	Protein_Coding	erbb2 interacting protein [Source:HGNC Symbol;Acc:HGNC:15842]	7117.98	0.323143	0.0884719	2.6e-05	0.00135189	9104	6094	6026	7713	7992	7662	9330	7741	5020.96	6418.28	6191.98	7648.83	8258.59	7901.19	8266.94	7989.5	Up Regulated
ENSG00000278272	ENSG00000278272.1		NA	NA	NA	Protein_Coding		1154.72	-1.2192	0.359719	2.65e-05	0.00137259	2484	1737	2118	713	544	539	623	619	1369.95	1829.43	2176.34	707.068	562.146	555.827	552.015	638.871	Down Regulated
ENSG00000205927	ENSG00000205927.5	OLIG2	33025935	33029196	1	Protein_Coding	oligodendrocyte transcription factor 2 [Source:HGNC Symbol;Acc:HGNC:9398]	258.725	0.44119	0.124863	2.65e-05	0.00137259	316	231	213	309	300	331	381	319	174.278	243.292	218.867	306.429	310.007	341.333	337.589	329.24	Up Regulated
ENSG00000221829	ENSG00000221829.9	FANCG	35073835	35080004	-1	Protein_Coding	FA complementation group G [Source:HGNC Symbol;Acc:HGNC:3588]	578.308	-0.535461	0.153274	2.66e-05	0.00137259	1279	656	816	441	460	419	498	394	705.383	690.908	838.476	437.331	475.344	432.08	441.258	406.648	Down Regulated
ENSG00000197405	ENSG00000197405.8	C5AR1	47290023	47322066	1	Protein_Coding	complement C5a receptor 1 [Source:HGNC Symbol;Acc:HGNC:1338]	3484.42	0.604007	0.174203	2.66e-05	0.00137259	2261	1896	1572	2852	2872	3284	3339	2956	1246.97	1996.89	1615.3	2828.27	2967.8	3386.52	2958.55	3050.89	Up Regulated
ENSG00000142657	ENSG00000142657.21	PGD	10398592	10420511	1	Protein_Coding	phosphogluconate dehydrogenase [Source:HGNC Symbol;Acc:HGNC:8891]	6528.94	0.406257	0.114255	2.76e-05	0.00141301	10061	4497	4471	7747	7198	7709	8608	7706	5548.75	4736.3	4594.15	7682.55	7438.1	7949.66	7627.21	7953.38	Up Regulated
ENSG00000167995	ENSG00000167995.16	BEST1	61950063	61965515	1	Protein_Coding	bestrophin 1 [Source:HGNC Symbol;Acc:HGNC:12703]	1417.91	0.351461	0.097526	2.78e-05	0.00141734	2381	1041	1134	1663	1694	1774	1848	1594	1313.15	1096.39	1165.23	1649.16	1750.51	1829.38	1637.44	1645.17	Up Regulated
ENSG00000114796	ENSG00000114796.16	KLHL24	183635610	183684519	1	Protein_Coding	kelch like family member 24 [Source:HGNC Symbol;Acc:HGNC:25947]	1774.39	0.3285	0.0906465	2.82e-05	0.0014299	2592	1383	1479	2067	2078	1928	2318	2058	1429.52	1456.59	1519.74	2049.8	2147.31	1988.19	2053.89	2124.07	Up Regulated
ENSG00000180543	ENSG00000180543.4	TSPYL5	97273488	97277928	-1	Protein_Coding	TSPY like 5 [Source:HGNC Symbol;Acc:HGNC:29367]	2728.53	0.258651	0.0694505	2.82e-05	0.0014299	4344	2428	2157	2926	3036	3020	3366	2934	2395.76	2557.2	2216.41	2901.66	3137.27	3114.28	2982.48	3028.19	Up Regulated
ENSG00000158246	ENSG00000158246.8	TENT5B	27005020	27012850	-1	Protein_Coding	terminal nucleotidyltransferase 5B [Source:HGNC Symbol;Acc:HGNC:28273]	14.6192	-1.32466	0.381229	2.87e-05	0.00144799	50	26	24	9	5	7	11	9	27.5756	27.3835	24.661	8.92512	5.16678	7.21853	9.74666	9.28891	Down Regulated
ENSG00000141655	ENSG00000141655.17	TNFRSF11A	62325287	62391288	1	Protein_Coding	TNF receptor superfamily member 11a [Source:HGNC Symbol;Acc:HGNC:11908]	203.234	-0.567404	0.162409	2.88e-05	0.00145043	524	302	327	152	161	179	200	169	288.992	318.07	336.007	150.735	166.37	184.588	177.212	174.425	Down Regulated
ENSG00000120756	ENSG00000120756.13	PLS1	142596393	142713664	1	Protein_Coding	plastin 1 [Source:HGNC Symbol;Acc:HGNC:9090]	56.1863	-0.749419	0.218629	2.97e-05	0.00148365	157	66	72	52	38	33	47	41	86.5873	69.5121	73.9831	51.5674	39.2675	34.0302	41.6448	42.3162	Down Regulated
ENSG00000109881	ENSG00000109881.17	CCDC34	27330827	27363234	-1	Protein_Coding	coiled-coil domain containing 34 [Source:HGNC Symbol;Acc:HGNC:25079]	87.3142	-0.729289	0.213713	3.06e-05	0.00151177	179	108	115	81	47	57	60	68	98.7205	113.747	118.168	80.3261	48.5678	58.7794	53.1636	70.1829	Down Regulated
ENSG00000143195	ENSG00000143195.13	ILDR2	166895711	166975540	-1	Protein_Coding	immunoglobulin like domain containing receptor 2 [Source:HGNC Symbol;Acc:HGNC:18131]	101.044	-0.567556	0.16465	3.09e-05	0.00152192	184	108	116	81	66	50	78	73	101.478	113.747	119.195	80.3261	68.2015	51.5609	69.1127	75.3434	Down Regulated
ENSG00000115648	ENSG00000115648.14	MLPH	237485428	237555322	1	Protein_Coding	melanophilin [Source:HGNC Symbol;Acc:HGNC:29643]	94.9969	0.668106	0.196928	3.18e-05	0.00154744	157	113	114	227	225	216	275	216	86.5873	119.013	117.14	225.111	232.505	222.743	243.667	222.934	Up Regulated
ENSG00000196747	ENSG00000196747.4	H2AC13	27808173	27808667	1	Protein_Coding	H2A clustered histone 13 [Source:HGNC Symbol;Acc:HGNC:4725]	839.812	-1.10141	0.329479	3.18e-05	0.00154744	2449	1564	2076	736	526	559	766	618	1350.65	1647.22	2133.18	729.877	543.546	576.451	678.722	637.839	Down Regulated
ENSG00000175305	ENSG00000175305.17	CCNE2	94879770	94896678	-1	Protein_Coding	cyclin E2 [Source:HGNC Symbol;Acc:HGNC:1590]	646.565	-0.485796	0.140382	3.25e-05	0.00156886	2015	909	1197	739	683	618	777	700	1111.3	957.371	1229.97	732.852	705.783	637.293	688.469	722.471	Down Regulated
ENSG00000196208	ENSG00000196208.14	GREB1	11482341	11642788	1	Protein_Coding	growth regulating estrogen receptor binding 1 [Source:HGNC Symbol;Acc:HGNC:24885]	104.324	0.518201	0.150887	3.27e-05	0.00157067	161	117	93	144	176	155	182	162	88.7933	123.226	95.5616	142.802	181.871	159.839	161.263	167.2	Up Regulated
ENSG00000167900	ENSG00000167900.12	TK1	78174091	78187233	-1	Protein_Coding	thymidine kinase 1 [Source:HGNC Symbol;Acc:HGNC:11830]	1008.37	-0.768981	0.22804	3.27e-05	0.00157067	2145	1019	1394	758	516	559	689	670	1182.99	1073.22	1432.4	751.693	533.212	576.451	610.495	691.508	Down Regulated
ENSG00000048740	ENSG00000048740.18	CELF2	10798397	11336675	1	Protein_Coding	CUGBP Elav-like family member 2 [Source:HGNC Symbol;Acc:HGNC:2550]	6373.5	0.18056	0.0470013	3.36e-05	0.00160486	7057	3900	4096	4782	4958	4580	5329	4659	3892.01	4107.53	4208.82	4742.21	5123.38	4722.98	4721.81	4808.56	Up Regulated
ENSG00000138613	ENSG00000138613.14	APH1B	63276018	63309126	1	Protein_Coding	aph-1 homolog B, gamma-secretase subunit [Source:HGNC Symbol;Acc:HGNC:24080]	738.558	0.306493	0.0850036	3.37e-05	0.00160486	1362	652	658	959	967	943	1096	911	751.158	686.695	676.124	951.021	999.256	972.439	971.122	940.245	Up Regulated
ENSG00000124198	ENSG00000124198.9	ARFGEF2	48921711	49036693	1	Protein_Coding	ADP ribosylation factor guanine nucleotide exchange factor 2 [Source:HGNC Symbol;Acc:HGNC:15853]	4426.46	0.164614	0.0424711	3.44e-05	0.00163486	8004	4217	4195	4863	5127	4819	5648	4891	4414.3	4441.4	4310.55	4822.54	5298.02	4969.44	5004.47	5048.01	Up Regulated
ENSG00000110911	ENSG00000110911.15	SLC11A2	50979401	51028566	-1	Protein_Coding	solute carrier family 11 member 2 [Source:HGNC Symbol;Acc:HGNC:10908]	2389.99	0.308283	0.0857185	3.44e-05	0.00163486	3927	2153	2072	2643	2908	2818	3232	2784	2165.78	2267.57	2129.07	2621.01	3005	2905.97	2863.75	2873.37	Up Regulated
ENSG00000105011	ENSG00000105011.9	ASF1B	14119512	14136613	-1	Protein_Coding	anti-silencing function 1B histone chaperone [Source:HGNC Symbol;Acc:HGNC:20996]	1115.5	-0.688372	0.204476	3.52e-05	0.00166312	2397	1421	1591	788	704	651	908	802	1321.97	1496.62	1634.82	781.444	727.483	671.323	804.543	827.746	Down Regulated
ENSG00000111231	ENSG00000111231.9	GPN3	110452486	110469268	-1	Protein_Coding	GPN-loop GTPase 3 [Source:HGNC Symbol;Acc:HGNC:30186]	830.289	-0.296545	0.082247	3.55e-05	0.0016722	1826	1058	1081	765	768	777	921	740	1007.06	1114.3	1110.77	758.635	793.618	801.257	816.061	763.755	Down Regulated
ENSG00000075702	ENSG00000075702.18	WDR62	36054649	36105108	1	Protein_Coding	WD repeat domain 62 [Source:HGNC Symbol;Acc:HGNC:24502]	394.62	-0.606362	0.179194	3.58e-05	0.00168359	725	378	500	255	246	231	253	244	399.846	398.114	513.772	252.878	254.206	238.211	224.173	251.833	Down Regulated
ENSG00000143751	ENSG00000143751.10	SDE2	225982702	225999343	-1	Protein_Coding	SDE2 telomere maintenance homolog [Source:HGNC Symbol;Acc:HGNC:26643]	3433.99	0.248503	0.0675945	3.65e-05	0.00170949	6944	2960	3504	4454	4353	4487	5031	4372	3829.69	3117.51	3600.51	4416.94	4498.2	4627.08	4457.77	4512.35	Up Regulated
ENSG00000136235	ENSG00000136235.16	GPNMB	23235967	23275108	1	Protein_Coding	glycoprotein nmb [Source:HGNC Symbol;Acc:HGNC:4462]	15623.5	0.334686	0.0945828	3.78e-05	0.00175927	35566	22097	20861	31340	30088	29710	34188	30698	19615	23272.8	21435.6	31079.3	31091.6	30637.5	30292.6	31683.5	Up Regulated
ENSG00000168393	ENSG00000168393.13	DTYMK	241675747	241686944	-1	Protein_Coding	deoxythymidylate kinase [Source:HGNC Symbol;Acc:HGNC:3061]	656.981	-0.488347	0.142973	3.78e-05	0.00175927	1426	805	999	588	501	504	677	551	786.455	847.836	1026.52	583.108	517.712	519.734	599.863	568.688	Down Regulated
ENSG00000277775	ENSG00000277775.1	H3C7	26250142	26250635	-1	Protein_Coding	H3 clustered histone 7 [Source:HGNC Symbol;Acc:HGNC:4773]	1222.17	-1.15258	0.350579	3.79e-05	0.00175949	3634	2274	2890	1004	748	730	988	897	2004.19	2395.01	2969.6	995.647	772.951	752.789	875.427	925.795	Down Regulated
ENSG00000131462	ENSG00000131462.8	TUBG1	42609641	42615238	1	Protein_Coding	tubulin gamma 1 [Source:HGNC Symbol;Acc:HGNC:12417]	451.912	-0.54812	0.161824	3.8e-05	0.00175983	849	466	521	365	292	292	333	296	468.233	490.797	535.35	361.963	301.74	301.116	295.058	305.502	Down Regulated
ENSG00000162607	ENSG00000162607.13	USP1	62436297	62451804	1	Protein_Coding	ubiquitin specific peptidase 1 [Source:HGNC Symbol;Acc:HGNC:12607]	2234.22	-0.402821	0.116421	3.95e-05	0.00181189	5978	2928	3388	2118	2178	1944	2404	2271	3296.93	3083.81	3481.32	2100.38	2250.65	2004.69	2130.09	2343.9	Down Regulated
ENSG00000070950	ENSG00000070950.10	RAD18	8775402	8963773	-1	Protein_Coding	RAD18 E3 ubiquitin protein ligase [Source:HGNC Symbol;Acc:HGNC:18278]	668.649	-0.3019	0.0845556	3.98e-05	0.00181493	1420	655	783	586	554	521	661	556	783.146	689.854	804.567	581.125	572.48	537.265	585.686	573.849	Down Regulated
ENSG00000160753	ENSG00000160753.16	RUSC1	155320894	155331114	1	Protein_Coding	RUN and SH3 domain containing 1 [Source:HGNC Symbol;Acc:HGNC:17153]	594.116	-0.449443	0.131522	4.09e-05	0.00185566	1180	598	714	453	453	428	491	374	650.783	629.821	733.666	449.231	468.111	441.361	435.056	386.006	Down Regulated
ENSG00000184371	ENSG00000184371.14	CSF1	109910242	109930992	1	Protein_Coding	colony stimulating factor 1 [Source:HGNC Symbol;Acc:HGNC:2432]	524.149	0.910138	0.277446	4.11e-05	0.00185701	150	167	124	338	342	352	486	328	82.7267	175.887	127.415	335.188	353.408	362.989	430.625	338.529	Up Regulated
ENSG00000135778	ENSG00000135778.12	NTPCR	232950605	232983882	1	Protein_Coding	nucleoside-triphosphatase, cancer-related [Source:HGNC Symbol;Acc:HGNC:28204]	1488.65	0.200676	0.0536537	4.15e-05	0.00186523	2576	1439	1367	1798	1806	1760	1929	1668	1420.69	1515.57	1404.65	1783.04	1866.24	1814.94	1709.21	1721.55	Up Regulated
ENSG00000170425	ENSG00000170425.3	ADORA2B	15945130	15975746	1	Protein_Coding	adenosine A2b receptor [Source:HGNC Symbol;Acc:HGNC:264]	209.384	0.571718	0.171011	4.16e-05	0.00186523	230	193	167	333	347	306	349	306	126.848	203.27	171.6	330.229	358.575	315.553	309.235	315.823	Up Regulated
ENSG00000149294	ENSG00000149294.16	NCAM1	112961247	113278436	1	Protein_Coding	neural cell adhesion molecule 1 [Source:HGNC Symbol;Acc:HGNC:7656]	292.025	0.866578	0.264623	4.16e-05	0.00186523	26	19	25	44	47	44	64	48	14.3393	20.011	25.6886	43.6339	48.5678	45.3736	56.7078	49.5409	Up Regulated
ENSG00000105173	ENSG00000105173.14	CCNE1	29811991	29824312	1	Protein_Coding	cyclin E1 [Source:HGNC Symbol;Acc:HGNC:1589]	326.455	-0.494394	0.14613	4.21e-05	0.00188436	823	432	534	287	298	272	336	284	453.894	454.988	548.708	284.612	307.94	280.491	297.716	293.117	Down Regulated
ENSG00000225968	ENSG00000225968.7	ELFN1	1665745	1747946	1	Protein_Coding	extracellular leucine rich repeat and fibronectin type III domain containing 1 [Source:HGNC Symbol;Acc:HGNC:33154]	44.1703	1.24869	0.385681	4.28e-05	0.00190062	16	9	7	20	28	28	38	30	8.82418	9.47892	7.19281	19.8336	28.934	28.8741	33.6703	30.963	Up Regulated
ENSG00000088833	ENSG00000088833.17	NSFL1C	1442162	1473842	-1	Protein_Coding	NSFL1 cofactor [Source:HGNC Symbol;Acc:HGNC:15912]	586.376	-0.275331	0.0767619	4.33e-05	0.00192035	1237	615	682	535	485	528	572	509	682.219	647.726	700.785	530.549	501.178	544.483	506.826	525.34	Down Regulated
ENSG00000092621	ENSG00000092621.12	PHGDH	119648411	119744218	1	Protein_Coding	phosphoglycerate dehydrogenase [Source:HGNC Symbol;Acc:HGNC:8923]	1159.92	-0.539565	0.160922	4.35e-05	0.0019234	782	366	465	286	247	245	263	281	431.282	385.476	477.808	283.62	255.239	252.648	233.034	290.021	Down Regulated
ENSG00000198176	ENSG00000198176.13	TFDP1	113584721	113641473	1	Protein_Coding	transcription factor Dp-1 [Source:HGNC Symbol;Acc:HGNC:11749]	2025	-0.25816	0.0714545	4.36e-05	0.0019234	4223	2119	2331	1837	1727	1665	2048	1833	2329.03	2231.76	2395.2	1821.72	1784.61	1716.98	1814.65	1891.84	Down Regulated
ENSG00000119950	ENSG00000119950.21	MXI1	110207605	110287365	1	Protein_Coding	MAX interactor 1, dimerization protein [Source:HGNC Symbol;Acc:HGNC:7534]	456.745	0.370103	0.107293	4.49e-05	0.00197291	533	296	277	470	429	497	473	418	293.955	311.751	284.63	466.09	443.31	512.515	419.106	431.418	Up Regulated
ENSG00000185127	ENSG00000185127.6	C6orf120	169702190	169704856	1	Protein_Coding	chromosome 6 open reading frame 120 [Source:HGNC Symbol;Acc:HGNC:21247]	2280.13	0.272243	0.0760819	4.51e-05	0.00197398	4311	2323	2143	2668	2975	2851	3364	2839	2377.56	2446.61	2202.03	2645.8	3074.24	2940	2980.71	2930.14	Up Regulated
ENSG00000067842	ENSG00000067842.17	ATP2B3	153517642	153582939	1	Protein_Coding	ATPase plasma membrane Ca2+ transporting 3 [Source:HGNC Symbol;Acc:HGNC:816]	53.0476	0.822253	0.252299	4.54e-05	0.00197675	65	48	55	87	102	103	136	101	35.8482	50.5542	56.5149	86.2762	105.402	106.215	120.504	104.242	Up Regulated
ENSG00000008513	ENSG00000008513.16	ST3GAL1	133454848	133571940	-1	Protein_Coding	ST3 beta-galactoside alpha-2,3-sialyltransferase 1 [Source:HGNC Symbol;Acc:HGNC:10862]	4824.09	0.34662	0.100179	4.77e-05	0.00204828	5445	3888	3669	5611	5241	5472	5752	5201	3002.98	4094.89	3770.06	5564.32	5415.82	5642.83	5096.62	5367.96	Up Regulated
ENSG00000170791	ENSG00000170791.17	CHCHD7	56211686	56218809	1	Protein_Coding	coiled-coil-helix-coiled-coil-helix domain containing 7 [Source:HGNC Symbol;Acc:HGNC:28314]	781.676	-0.277824	0.0787005	5.27e-05	0.00222565	2034	1011	981	838	783	753	953	800	1121.77	1064.8	1008.02	831.028	809.118	776.507	844.415	825.681	Down Regulated
ENSG00000265273	ENSG00000265273.1	PGDP1	31962178	31963618	1	Protein_Coding	phosphogluconate dehydrogenase pseudogene 1 [Source:HGNC Symbol;Acc:HGNC:8892]	1169.04	0.375195	0.110467	5.4e-05	0.00226478	1939	871	968	1542	1386	1508	1644	1562	1069.38	917.348	994.662	1529.17	1432.23	1555.08	1456.68	1612.14	Up Regulated
ENSG00000104687	ENSG00000104687.14	GSR	30678066	30727846	-1	Protein_Coding	glutathione-disulfide reductase [Source:HGNC Symbol;Acc:HGNC:4623]	4826.59	0.225676	0.0624405	5.49e-05	0.00228091	10049	5264	4933	6783	6677	6554	7566	6597	5542.14	5544.11	5068.87	6726.57	6899.72	6758.6	6703.93	6808.77	Up Regulated
ENSG00000124496	ENSG00000124496.12	TRERF1	42224931	42452051	-1	Protein_Coding	transcriptional regulating factor 1 [Source:HGNC Symbol;Acc:HGNC:18273]	2747.47	0.299021	0.0858902	5.49e-05	0.00228091	3509	2363	2229	2882	2958	2953	3303	2935	1935.25	2488.74	2290.39	2858.02	3056.67	3045.19	2926.66	3029.22	Up Regulated
ENSG00000221843	ENSG00000221843.4	C2orf16	27537386	27582720	1	Protein_Coding	chromosome 2 open reading frame 16 [Source:HGNC Symbol;Acc:HGNC:25275]	222.395	0.438422	0.131618	5.5e-05	0.00228091	238	148	133	243	241	224	243	230	131.26	155.876	136.663	240.978	249.039	230.993	215.313	237.383	Up Regulated
ENSG00000284859	ENSG00000284859.1	MIR124-1HG	10046775	10053583	1	Protein_Coding	MIR124-1 host gene [Source:HGNC Symbol;Acc:HGNC:27231]	25.7153	1.02281	0.322282	5.51e-05	0.0022813	27	31	19	79	93	83	78	72	14.8908	32.6496	19.5233	78.3427	96.1022	85.5911	69.1127	74.3113	Up Regulated
ENSG00000175455	ENSG00000175455.15	CCDC14	123897305	123961408	-1	Protein_Coding	coiled-coil domain containing 14 [Source:HGNC Symbol;Acc:HGNC:25766]	2349.23	-0.315311	0.091181	5.53e-05	0.00228341	4694	2654	2994	2191	2060	1882	2407	2050	2588.79	2795.23	3076.47	2172.77	2128.71	1940.75	2132.75	2115.81	Down Regulated
ENSG00000087842	ENSG00000087842.11	PIR	15384799	15493564	-1	Protein_Coding	pirin [Source:HGNC Symbol;Acc:HGNC:30048]	256.992	0.516354	0.156929	5.62e-05	0.00230536	518	179	168	454	412	379	511	376	285.683	188.525	172.627	450.223	425.743	390.832	452.777	388.07	Up Regulated
ENSG00000152409	ENSG00000152409.9	JMY	79236131	79327211	1	Protein_Coding	junction mediating and regulatory protein, p53 cofactor [Source:HGNC Symbol;Acc:HGNC:28916]	768.178	0.310865	0.0906513	5.69e-05	0.00232142	894	608	608	826	831	735	895	833	493.051	640.353	624.747	819.128	858.719	757.945	793.024	859.741	Up Regulated
ENSG00000137269	ENSG00000137269.15	LRRC1	53794497	53924125	1	Protein_Coding	leucine rich repeat containing 1 [Source:HGNC Symbol;Acc:HGNC:14307]	144.323	-0.446781	0.135158	5.73e-05	0.00232883	337	163	199	130	112	119	152	108	185.859	171.674	204.481	128.918	115.736	122.715	134.681	111.467	Down Regulated
ENSG00000142528	ENSG00000142528.16	ZNF473	50025714	50053414	1	Protein_Coding	zinc finger protein 473 [Source:HGNC Symbol;Acc:HGNC:23239]	943.574	-0.304129	0.0877765	5.76e-05	0.00233537	2065	948	1044	852	771	804	884	775	1138.87	998.446	1072.76	844.911	796.718	829.099	783.277	799.879	Down Regulated
ENSG00000108306	ENSG00000108306.13	FBXL20	39252663	39402523	-1	Protein_Coding	F-box and leucine rich repeat protein 20 [Source:HGNC Symbol;Acc:HGNC:24679]	1446.81	0.217389	0.0602122	5.92e-05	0.00238645	1860	933	1071	1291	1337	1241	1416	1216	1025.81	982.648	1100.5	1280.26	1381.6	1279.74	1254.66	1255.04	Up Regulated
ENSG00000081870	ENSG00000081870.11	HSPB11	53916574	53945699	-1	Protein_Coding	heat shock protein family B (small) member 11 [Source:HGNC Symbol;Acc:HGNC:25019]	736.24	-0.32937	0.0962742	5.97e-05	0.00239805	1894	852	945	734	696	687	785	677	1044.56	897.337	971.029	727.893	719.216	708.447	695.557	698.733	Down Regulated
ENSG00000144283	ENSG00000144283.21	PKP4	158456952	158682879	1	Protein_Coding	plakophilin 4 [Source:HGNC Symbol;Acc:HGNC:9026]	1934.28	-0.259252	0.0736484	6.11e-05	0.00243412	3358	1637	1943	1411	1307	1433	1640	1389	1851.97	1724.11	1996.52	1399.26	1350.6	1477.74	1453.14	1433.59	Down Regulated
ENSG00000164002	ENSG00000164002.11	EXO5	40508741	40516038	1	Protein_Coding	exonuclease 5 [Source:HGNC Symbol;Acc:HGNC:26115]	2292.85	-0.215173	0.0597048	6.22e-05	0.00247124	4935	2708	2789	2472	2202	2288	2571	2264	2721.71	2852.1	2865.82	2451.43	2275.45	2359.43	2278.06	2336.68	Down Regulated
ENSG00000125450	ENSG00000125450.11	NUP85	75205659	75235758	1	Protein_Coding	nucleoporin 85 [Source:HGNC Symbol;Acc:HGNC:8734]	1077.72	-0.261768	0.0745742	6.27e-05	0.00248623	2701	1204	1352	1140	1034	1066	1222	1040	1489.63	1268.07	1389.24	1130.52	1068.49	1099.28	1082.77	1073.39	Down Regulated
ENSG00000152954	ENSG00000152954.12	NRSN1	24126186	24154900	1	Protein_Coding	neurensin 1 [Source:HGNC Symbol;Acc:HGNC:17881]	103.552	0.843674	0.267845	6.46e-05	0.00253923	79	75	53	193	185	161	221	162	43.5694	78.991	54.4598	191.394	191.171	166.026	195.819	167.2	Up Regulated
ENSG00000151474	ENSG00000151474.23	FRMD4A	13643706	14462142	-1	Protein_Coding	FERM domain containing 4A [Source:HGNC Symbol;Acc:HGNC:25491]	1043.26	0.318232	0.0937652	6.83e-05	0.00263251	1287	703	710	875	958	973	1084	921	709.795	740.409	729.556	867.72	989.956	1003.38	960.489	950.566	Up Regulated
ENSG00000072210	ENSG00000072210.18	ALDH3A2	19648136	19685760	1	Protein_Coding	aldehyde dehydrogenase 3 family member A2 [Source:HGNC Symbol;Acc:HGNC:403]	670.097	0.283827	0.0825606	7.01e-05	0.00267438	1223	654	598	908	807	885	1027	898	674.498	688.801	614.471	900.445	833.919	912.628	909.984	926.827	Up Regulated
ENSG00000138180	ENSG00000138180.15	CEP55	93496612	93529092	1	Protein_Coding	centrosomal protein 55 [Source:HGNC Symbol;Acc:HGNC:1161]	452.043	-0.584691	0.183713	7.26e-05	0.0027505	799	455	515	232	266	225	276	290	440.657	479.212	529.185	230.07	274.873	232.024	244.553	299.309	Down Regulated
ENSG00000116701	ENSG00000116701.14	NCF2	183555562	183590876	-1	Protein_Coding	neutrophil cytosolic factor 2 [Source:HGNC Symbol;Acc:HGNC:7661]	2830.86	0.298168	0.0877029	7.42e-05	0.00279663	6023	3625	3456	5015	4848	4576	5661	4853	3321.75	3817.9	3551.19	4973.28	5009.71	4718.85	5015.99	5008.79	Up Regulated
ENSG00000136478	ENSG00000136478.7	TEX2	64147227	64263260	-1	Protein_Coding	testis expressed 2 [Source:HGNC Symbol;Acc:HGNC:30884]	4416.83	0.20951	0.058793	7.59e-05	0.00284573	7870	4429	4329	5155	5199	5216	6164	5377	4340.39	4664.68	4448.24	5112.11	5372.42	5378.83	5461.67	5549.61	Up Regulated
ENSG00000171246	ENSG00000171246.6	NPTX1	80466834	80477843	-1	Protein_Coding	neuronal pentraxin 1 [Source:HGNC Symbol;Acc:HGNC:7952]	1340.05	1.15316	0.375023	7.59e-05	0.00284573	742	306	208	1432	1532	1532	1642	1373	409.221	322.283	213.729	1420.09	1583.1	1579.83	1454.91	1417.08	Up Regulated
ENSG00000166508	ENSG00000166508.17	MCM7	100092728	100101940	-1	Protein_Coding	minichromosome maintenance complex component 7 [Source:HGNC Symbol;Acc:HGNC:6950]	3116.44	-0.528219	0.165712	7.69e-05	0.00287815	7251	3190	4046	2488	2040	2263	2519	2409	3999.01	3359.75	4157.44	2467.3	2108.05	2333.65	2231.99	2486.33	Down Regulated
ENSG00000147852	ENSG00000147852.16	VLDLR	2621182	2660056	1	Protein_Coding	very low density lipoprotein receptor [Source:HGNC Symbol;Acc:HGNC:12698]	1357.61	0.433752	0.134352	8e-05	0.00295588	689	386	493	718	672	730	836	616	379.991	406.54	506.579	712.026	694.416	752.789	740.746	635.775	Up Regulated
ENSG00000235750	ENSG00000235750.10	KIAA0040	175156986	175192999	-1	Protein_Coding	KIAA0040 [Source:HGNC Symbol;Acc:HGNC:28950]	657.911	-0.30465	0.0903935	8.03e-05	0.00295588	1777	915	874	696	664	706	775	667	980.035	963.69	898.073	690.209	686.149	728.04	686.697	688.412	Down Regulated
ENSG00000278588	ENSG00000278588.1	H2BC10	26272931	26273412	1	Protein_Coding	H2B clustered histone 10 [Source:HGNC Symbol;Acc:HGNC:4756]	712.574	-1.04163	0.340424	8.19e-05	0.003003	1392	959	1167	432	335	315	403	418	767.704	1010.03	1199.14	428.406	346.174	324.834	357.082	431.418	Down Regulated
ENSG00000099219	ENSG00000099219.14	ERMP1	5749832	5879537	-1	Protein_Coding	endoplasmic reticulum metallopeptidase 1 [Source:HGNC Symbol;Acc:HGNC:23703]	7376.63	0.223184	0.0636247	8.32e-05	0.003027	13057	7130	7216	9121	8882	8926	10447	9037	7201.08	7509.41	7414.76	9045.11	9178.27	9204.65	9256.67	9327.1	Up Regulated
ENSG00000114742	ENSG00000114742.14	WDR48	39052013	39096671	1	Protein_Coding	WD repeat domain 48 [Source:HGNC Symbol;Acc:HGNC:30914]	732.394	0.227041	0.0651325	8.66e-05	0.00312986	1157	653	639	791	814	737	925	835	638.098	687.748	656.6	784.419	841.152	760.008	819.606	861.805	Up Regulated
ENSG00000138798	ENSG00000138798.12	EGF	109912883	110013766	1	Protein_Coding	epidermal growth factor [Source:HGNC Symbol;Acc:HGNC:3229]	42.776	0.59951	0.192942	8.71e-05	0.00313834	60	42	47	76	74	89	82	75	33.0907	44.2349	48.2946	75.3677	76.4684	91.7784	72.6569	77.4076	Up Regulated
ENSG00000110066	ENSG00000110066.15	KMT5B	68154863	68213828	-1	Protein_Coding	lysine methyltransferase 5B [Source:HGNC Symbol;Acc:HGNC:24283]	1253.14	0.255057	0.0744444	8.74e-05	0.00314187	1853	1094	1007	1436	1400	1334	1590	1357	1021.95	1152.21	1034.74	1424.05	1446.7	1375.65	1408.84	1400.56	Up Regulated
ENSG00000163536	ENSG00000163536.12	SERPINI1	167735243	167825569	1	Protein_Coding	serpin family I member 1 [Source:HGNC Symbol;Acc:HGNC:8943]	699.957	0.597987	0.191804	8.76e-05	0.0031424	1101	748	746	1538	1452	1435	1700	1434	607.214	787.803	766.548	1525.2	1500.43	1479.8	1506.3	1480.03	Up Regulated
ENSG00000179630	ENSG00000179630.11	LACC1	43879284	43893932	1	Protein_Coding	laccase domain containing 1 [Source:HGNC Symbol;Acc:HGNC:26789]	4043.99	0.490996	0.155113	8.82e-05	0.00315826	5168	2409	2143	3692	3971	4045	4831	4000	2850.21	2537.19	2202.03	3661.28	4103.46	4171.28	4280.56	4128.41	Up Regulated
ENSG00000113240	ENSG00000113240.13	CLK4	178602664	178630615	-1	Protein_Coding	CDC like kinase 4 [Source:HGNC Symbol;Acc:HGNC:13659]	686.322	0.302449	0.090498	8.9e-05	0.00318271	1264	620	653	878	910	859	1064	866	697.11	652.992	670.986	870.695	940.354	885.816	942.768	893.8	Up Regulated
ENSG00000106799	ENSG00000106799.13	TGFBR1	99104038	99154192	1	Protein_Coding	transforming growth factor beta receptor 1 [Source:HGNC Symbol;Acc:HGNC:11772]	11646.1	0.330265	0.100033	8.94e-05	0.00319201	22545	15276	14772	20192	20694	19030	23430	20224	12433.8	16088.9	15178.9	20024	21384.3	19624.1	20760.4	20873.2	Up Regulated
ENSG00000187837	ENSG00000187837.3	H1-2	26055740	26056470	-1	Protein_Coding	H1.2 linker histone, cluster member [Source:HGNC Symbol;Acc:HGNC:4716]	3578.53	-0.731947	0.238316	9.04e-05	0.00320894	8729	6126	7075	3554	2880	2943	3332	3119	4814.14	6451.98	7269.87	3524.43	2976.07	3034.88	2952.35	3219.13	Down Regulated
ENSG00000086061	ENSG00000086061.16	DNAJA1	33025273	33039907	1	Protein_Coding	DnaJ heat shock protein family (Hsp40) member A1 [Source:HGNC Symbol;Acc:HGNC:5229]	4513.6	-0.332546	0.100913	9.06e-05	0.00321203	10288	5027	4987	3759	3759	3585	4314	3737	5673.95	5294.5	5124.36	3727.73	3884.39	3696.92	3822.46	3856.96	Down Regulated
ENSG00000121966	ENSG00000121966.6	CXCR4	136114349	136119177	-1	Protein_Coding	C-X-C motif chemokine receptor 4 [Source:HGNC Symbol;Acc:HGNC:2561]	274.899	0.731452	0.242673	9.55e-05	0.00336726	440	168	286	538	516	581	629	563	242.665	176.94	293.877	533.524	533.212	599.138	557.332	581.073	Up Regulated
ENSG00000243335	ENSG00000243335.9	KCTD7	66628881	66649067	1	Protein_Coding	potassium channel tetramerization domain containing 7 [Source:HGNC Symbol;Acc:HGNC:21957]	311.753	0.340159	0.104247	9.67e-05	0.00340467	477	276	261	365	372	404	436	344	263.071	290.687	268.189	361.963	384.409	416.612	386.322	355.043	Up Regulated
ENSG00000185420	ENSG00000185420.19	SMYD3	245749342	246507312	-1	Protein_Coding	SET and MYND domain containing 3 [Source:HGNC Symbol;Acc:HGNC:15513]	2029.68	0.31036	0.0942186	0.000100849	0.00351968	4483	2126	2323	3288	3255	3156	3712	3211	2472.42	2239.13	2386.98	3260.64	3363.58	3254.52	3289.06	3314.08	Up Regulated
ENSG00000164430	ENSG00000164430.16	CGAS	73413515	73452297	-1	Protein_Coding	cyclic GMP-AMP synthase [Source:HGNC Symbol;Acc:HGNC:21367]	849.857	-0.406439	0.127844	0.00010306	0.00357716	1872	935	935	718	676	642	756	620	1032.43	984.754	960.753	712.026	698.549	662.042	669.861	639.903	Down Regulated
ENSG00000257199	ENSG00000257199.2		76984079	76984669	-1	Protein_Coding	RAN binding protein 1 (RANBP1) pseudogene	35.4757	-0.731436	0.24022	0.000107333	0.00367646	99	53	57	35	20	27	37	30	54.5996	55.8203	58.57	34.7088	20.6671	27.8429	32.7842	30.963	Down Regulated
ENSG00000259781	ENSG00000259781.1	HMGB1P6	71164770	71165415	-1	Protein_Coding	high mobility group box 1 pseudogene 6 [Source:HGNC Symbol;Acc:HGNC:4998]	668.646	-0.327967	0.10134	0.000112799	0.00382499	1634	897	1057	679	692	712	761	638	901.169	944.732	1086.11	673.351	715.083	734.227	674.292	658.481	Down Regulated
ENSG00000179348	ENSG00000179348.11	GATA2	128479427	128493201	-1	Protein_Coding	GATA binding protein 2 [Source:HGNC Symbol;Acc:HGNC:4171]	168.665	0.664443	0.220573	0.000113146	0.00382522	132	90	66	138	154	151	193	145	72.7995	94.7892	67.8179	136.852	159.137	155.714	171.01	149.655	Up Regulated
ENSG00000006634	ENSG00000006634.8	DBF4	87876216	87909553	1	Protein_Coding	DBF4 zinc finger [Source:HGNC Symbol;Acc:HGNC:17364]	495.385	-0.313916	0.0964353	0.000113182	0.00382522	1051	601	636	538	452	469	555	415	579.638	632.981	653.518	533.524	467.077	483.641	491.763	428.322	Down Regulated
ENSG00000274618	ENSG00000274618.1	H4C6	26240393	26240793	1	Protein_Coding	H4 clustered histone 6 [Source:HGNC Symbol;Acc:HGNC:4783]	1263.96	-0.711521	0.237491	0.000115935	0.00391176	3223	2119	2497	1277	962	1055	1271	1142	1777.52	2231.76	2565.78	1266.38	994.089	1087.94	1126.18	1178.66	Down Regulated
ENSG00000138433	ENSG00000138433.16	CIR1	174348022	174395712	-1	Protein_Coding	corepressor interacting with RBPJ, CIR1 [Source:HGNC Symbol;Acc:HGNC:24217]	589.274	0.294873	0.09016	0.000116966	0.00393346	911	543	529	736	751	762	755	698	502.427	571.895	543.571	729.877	776.051	785.788	668.975	720.407	Up Regulated
ENSG00000163814	ENSG00000163814.8	CDCP1	45082277	45146422	-1	Protein_Coding	CUB domain containing protein 1 [Source:HGNC Symbol;Acc:HGNC:24357]	441.087	0.474802	0.154206	0.000117413	0.00394196	291	234	188	333	317	338	371	339	160.49	246.452	193.178	330.229	327.574	348.552	328.728	349.882	Up Regulated
ENSG00000140450	ENSG00000140450.9	ARRDC4	97960703	97973833	1	Protein_Coding	arrestin domain containing 4 [Source:HGNC Symbol;Acc:HGNC:28087]	1972.67	0.354885	0.111349	0.000118828	0.00398289	4795	2434	2199	3512	3527	3577	4144	3407	2644.5	2563.52	2259.57	3482.78	3644.65	3688.67	3671.83	3516.37	Up Regulated
ENSG00000263606	ENSG00000263606.1	CHORDC1P4	2945550	2946890	-1	Protein_Coding	CHORDC1 pseudogene 4 [Source:HGNC Symbol;Acc:HGNC:54688]	253.204	-0.339945	0.105992	0.000119042	0.00398349	515	272	295	236	207	233	226	187	284.028	286.474	303.125	234.036	213.905	240.274	200.25	193.003	Down Regulated
ENSG00000102098	ENSG00000102098.18	SCML2	18239313	18354688	-1	Protein_Coding	Scm polycomb group protein like 2 [Source:HGNC Symbol;Acc:HGNC:10581]	81.007	-0.642913	0.211669	0.000119351	0.00398725	145	69	85	57	33	42	61	43	79.9691	72.6717	87.3412	56.5258	34.1008	43.3112	54.0497	44.3804	Down Regulated
ENSG00000138061	ENSG00000138061.12	CYP1B1	38066973	38109902	-1	Protein_Coding	cytochrome P450 family 1 subfamily B member 1 [Source:HGNC Symbol;Acc:HGNC:2597]	2505.27	1.2681	0.436824	0.000126213	0.00418254	1848	697	651	5593	5455	5146	6507	5759	1019.19	734.089	668.931	5546.47	5636.96	5306.65	5765.59	5943.87	Up Regulated
ENSG00000171940	ENSG00000171940.13	ZNF217	53567071	53609907	-1	Protein_Coding	zinc finger protein 217 [Source:HGNC Symbol;Acc:HGNC:13009]	3425.73	0.207315	0.060433	0.000126226	0.00418254	5684	2765	3012	3461	3497	3662	4155	3552	3134.79	2912.13	3094.96	3432.2	3613.65	3776.32	3681.58	3666.03	Up Regulated
ENSG00000164935	ENSG00000164935.6	DCSTAMP	104339087	104356689	1	Protein_Coding	dendrocyte expressed seven transmembrane protein [Source:HGNC Symbol;Acc:HGNC:18549]	360.219	0.696491	0.235965	0.00013177	0.00433148	127	102	75	181	177	191	225	177	70.0419	107.428	77.0658	179.494	182.904	196.963	199.364	182.682	Up Regulated
ENSG00000185640	ENSG00000185640.5	KRT79	52821408	52834311	-1	Protein_Coding	keratin 79 [Source:HGNC Symbol;Acc:HGNC:28930]	24.0373	1.1973	0.41822	0.000134845	0.00441058	5	16	7	40	41	37	46	49	2.75756	16.8514	7.19281	39.6672	42.3676	38.1551	40.7588	50.573	Up Regulated
ENSG00000160179	ENSG00000160179.18	ABCG1	42199689	42297244	1	Protein_Coding	ATP binding cassette subfamily G member 1 [Source:HGNC Symbol;Acc:HGNC:73]	215.093	0.763912	0.258678	0.000135112	0.00441222	308	293	297	497	560	548	698	591	169.865	308.591	305.18	492.865	578.68	565.108	618.47	609.972	Up Regulated
ENSG00000147614	ENSG00000147614.4	ATP6V0D2	85987323	86154225	1	Protein_Coding	ATPase H+ transporting V0 subunit d2 [Source:HGNC Symbol;Acc:HGNC:18266]	148.2	0.980222	0.338584	0.000136012	0.00442737	45	119	128	361	351	320	397	370	24.818	125.332	131.526	357.996	362.708	329.99	351.766	381.878	Up Regulated
ENSG00000103479	ENSG00000103479.16	RBL2	53433977	53491648	1	Protein_Coding	RB transcriptional corepressor like 2 [Source:HGNC Symbol;Acc:HGNC:9894]	1931.94	0.213843	0.0632056	0.000140361	0.00455433	3116	1868	1782	2167	2218	2087	2606	2196	1718.51	1967.4	1831.08	2148.97	2291.98	2152.15	2309.07	2266.5	Up Regulated
ENSG00000282608	ENSG00000282608.1	ADORA3	111499429	111503633	-1	Protein_Coding	adenosine A3 receptor [Source:HGNC Symbol;Acc:HGNC:268]	271.649	0.564584	0.189466	0.000140733	0.00455912	568	352	322	539	568	594	722	593	313.258	370.731	330.869	534.516	586.947	612.544	639.735	612.036	Up Regulated
ENSG00000198001	ENSG00000198001.13	IRAK4	43758944	43798307	1	Protein_Coding	interleukin 1 receptor associated kinase 4 [Source:HGNC Symbol;Acc:HGNC:17967]	1007.17	-0.264445	0.0809139	0.000143596	0.00460051	2190	1187	1257	1080	979	922	1096	956	1207.81	1250.16	1291.62	1071.01	1011.66	950.783	971.122	986.689	Down Regulated
ENSG00000153317	ENSG00000153317.15	ASAP1	130052104	130443674	-1	Protein_Coding	ArfGAP with SH3 domain, ankyrin repeat and PH domain 1 [Source:HGNC Symbol;Acc:HGNC:2720]	5843.36	0.342048	0.108919	0.000145428	0.00463727	5470	3642	3736	4995	4841	4908	5767	5198	3016.77	3835.8	3838.9	4953.44	5002.48	5061.22	5109.91	5364.86	Up Regulated
ENSG00000158042	ENSG00000158042.8	MRPL17	6680385	6683340	-1	Protein_Coding	mitochondrial ribosomal protein L17 [Source:HGNC Symbol;Acc:HGNC:14053]	756.712	-0.302515	0.0948289	0.0001496	0.00471349	1632	910	835	787	634	680	809	659	900.066	958.424	857.999	780.452	655.148	701.228	716.823	680.155	Down Regulated
ENSG00000173083	ENSG00000173083.15	HPSE	83292461	83335153	-1	Protein_Coding	heparanase [Source:HGNC Symbol;Acc:HGNC:5164]	389.223	-0.407987	0.132012	0.000150012	0.00471679	978	601	595	356	385	355	413	400	539.378	632.981	611.388	353.038	397.842	366.082	365.943	412.841	Down Regulated
ENSG00000110799	ENSG00000110799.13	VWF	5948877	6124770	-1	Protein_Coding	von Willebrand factor [Source:HGNC Symbol;Acc:HGNC:12726]	176.955	0.747508	0.258388	0.000151606	0.0047389	135	137	124	287	257	290	312	309	74.454	144.29	127.415	284.612	265.573	299.053	276.451	318.919	Up Regulated
ENSG00000219507	ENSG00000219507.4	FTH1P8	148052233	148052746	1	Protein_Coding	ferritin heavy chain 1 pseudogene 8 [Source:HGNC Symbol;Acc:HGNC:3995]	2060.49	0.367307	0.118557	0.000151621	0.0047389	2565	1250	1137	1696	1581	1867	2174	1946	1414.63	1316.52	1168.32	1681.89	1633.74	1925.28	1926.29	2008.47	Up Regulated
ENSG00000215835	ENSG00000215835.2		166275629	166277597	-1	Protein_Coding	Ewing sarcoma breakpoint region 1 (EWSR1) pseudogene	1255.76	0.280351	0.0870388	0.000152296	0.00474453	2377	1189	1225	1609	1662	1577	1845	1721	1310.94	1252.27	1258.74	1595.61	1717.44	1626.23	1634.78	1776.25	Up Regulated
ENSG00000147677	ENSG00000147677.11	EIF3H	116642130	116766925	-1	Protein_Coding	eukaryotic translation initiation factor 3 subunit H [Source:HGNC Symbol;Acc:HGNC:3273]	6339.96	0.178759	0.051837	0.000154502	0.00480588	11921	6854	6612	7969	7761	7753	9360	8039	6574.57	7218.72	6794.12	7902.7	8019.88	7995.04	8293.52	8297.07	Up Regulated
ENSG00000047249	ENSG00000047249.18	ATP6V1H	53715543	53843558	-1	Protein_Coding	ATPase H+ transporting V1 subunit H [Source:HGNC Symbol;Acc:HGNC:18303]	2944.33	0.210879	0.0630633	0.000165813	0.00509531	3649	2066	2044	2635	2478	2542	3128	2424	2012.46	2175.94	2100.3	2613.08	2560.66	2621.36	2771.6	2501.81	Up Regulated
ENSG00000177426	ENSG00000177426.20	TGIF1	3411608	3459978	1	Protein_Coding	TGFB induced factor homeobox 1 [Source:HGNC Symbol;Acc:HGNC:11776]	1282.46	0.265053	0.0822135	0.000166211	0.00509982	2333	1177	1148	1510	1552	1670	1744	1489	1286.68	1239.63	1179.62	1497.44	1603.77	1722.13	1545.29	1536.8	Up Regulated
ENSG00000143882	ENSG00000143882.12	ATP6V1C2	10721100	10785110	1	Protein_Coding	ATPase H+ transporting V1 subunit C2 [Source:HGNC Symbol;Acc:HGNC:18264]	868.916	0.431019	0.143621	0.000168493	0.00513107	1487	1140	1077	1998	1802	1781	2013	1697	820.097	1200.66	1106.66	1981.38	1862.11	1836.6	1783.64	1751.48	Up Regulated
ENSG00000144711	ENSG00000144711.16	IQSEC1	12897043	13283281	-1	Protein_Coding	IQ motif and Sec7 domain ArfGEF 1 [Source:HGNC Symbol;Acc:HGNC:29112]	812.693	0.4419	0.147739	0.000169791	0.00515499	1087	571	516	969	897	946	1094	949	599.493	601.385	530.213	960.938	926.921	975.532	969.35	979.464	Up Regulated
ENSG00000132773	ENSG00000132773.12	TOE1	45340052	45343973	1	Protein_Coding	target of EGR1, exonuclease [Source:HGNC Symbol;Acc:HGNC:15954]	479.455	-0.34884	0.11302	0.000170542	0.00515499	1146	538	556	443	384	425	471	410	632.032	566.629	571.314	439.314	396.809	438.268	417.334	423.162	Down Regulated
ENSG00000125845	ENSG00000125845.7	BMP2	6767686	6780246	1	Protein_Coding	bone morphogenetic protein 2 [Source:HGNC Symbol;Acc:HGNC:1069]	663.263	0.451222	0.151845	0.000175201	0.00528778	570	376	294	512	540	497	654	522	314.361	396.008	302.098	507.74	558.013	512.515	579.483	538.757	Up Regulated
ENSG00000102575	ENSG00000102575.11	ACP5	11574653	11579993	-1	Protein_Coding	acid phosphatase 5, tartrate resistant [Source:HGNC Symbol;Acc:HGNC:124]	67.8554	0.845174	0.299115	0.000176542	0.00532036	77	38	44	166	122	139	180	151	42.4664	40.0221	45.2119	164.619	126.069	143.339	159.491	155.847	Up Regulated
ENSG00000144645	ENSG00000144645.13	OSBPL10	31657912	32077580	-1	Protein_Coding	oxysterol binding protein like 10 [Source:HGNC Symbol;Acc:HGNC:16395]	271.376	-0.352454	0.115118	0.000180887	0.00539527	417	242	259	174	197	168	181	154	229.98	254.878	266.134	172.552	203.571	173.245	160.377	158.944	Down Regulated
ENSG00000169826	ENSG00000169826.8	CSGALNACT2	43138445	43185302	1	Protein_Coding	chondroitin sulfate N-acetylgalactosaminyltransferase 2 [Source:HGNC Symbol;Acc:HGNC:24292]	751.694	0.36874	0.121645	0.000184409	0.00544434	763	485	480	680	667	700	801	674	420.803	510.808	493.221	674.342	689.249	721.853	709.734	695.637	Up Regulated
ENSG00000102054	ENSG00000102054.17	RBBP7	16839283	16870362	-1	Protein_Coding	RB binding protein 7, chromatin remodeling factor [Source:HGNC Symbol;Acc:HGNC:9890]	2102.76	-0.287465	0.0913419	0.00018739	0.00547665	5108	2373	2653	1922	1907	1817	2318	1969	2817.12	2499.27	2726.07	1906.01	1970.61	1873.72	2053.89	2032.21	Down Regulated
ENSG00000164626	ENSG00000164626.9	KCNK5	39188971	39229475	-1	Protein_Coding	potassium two pore domain channel subfamily K member 5 [Source:HGNC Symbol;Acc:HGNC:6280]	167.18	-0.652115	0.228378	0.000189511	0.00552273	381	177	160	98	117	83	89	98	210.126	186.419	164.407	97.1846	120.903	85.5911	78.8593	101.146	Down Regulated
ENSG00000177156	ENSG00000177156.11	TALDO1	747415	765012	1	Protein_Coding	transaldolase 1 [Source:HGNC Symbol;Acc:HGNC:11559]	4153.61	0.413625	0.138996	0.000191798	0.00558138	7080	3525	3287	6115	5542	5780	6786	5974	3904.7	3712.58	3377.54	6064.12	5726.86	5960.44	6012.8	6165.78	Up Regulated
ENSG00000067066	ENSG00000067066.17	SP100	230415942	230545606	1	Protein_Coding	SP100 nuclear antigen [Source:HGNC Symbol;Acc:HGNC:11206]	4223.46	0.286193	0.0912422	0.000194284	0.00564562	5964	3812	3745	5307	5277	4907	5841	4739	3289.21	4014.85	3848.15	5262.85	5453.02	5060.19	5175.48	4891.13	Up Regulated
ENSG00000115594	ENSG00000115594.12	IL1R1	102064544	102179874	1	Protein_Coding	interleukin 1 receptor type 1 [Source:HGNC Symbol;Acc:HGNC:5993]	474.873	0.545991	0.189728	0.00019499	0.00565806	247	124	178	239	243	271	300	267	136.223	130.598	182.903	237.012	251.106	279.46	265.818	275.571	Up Regulated
ENSG00000087299	ENSG00000087299.12	L2HGDH	50237563	50312229	-1	Protein_Coding	L-2-hydroxyglutarate dehydrogenase [Source:HGNC Symbol;Acc:HGNC:20499]	135	-0.490849	0.168297	0.000199126	0.00573709	305	141	163	88	96	77	118	98	168.211	148.503	167.49	87.2678	99.2022	79.4038	104.555	101.146	Down Regulated
ENSG00000219682	ENSG00000219682.4		25140003	25141403	1	Protein_Coding	nucleoporin 50kD (NUP50) pseudogene	341.537	-0.36612	0.121681	0.000203741	0.00583247	878	404	478	345	296	323	361	331	484.227	425.498	491.166	342.13	305.874	333.084	319.868	341.626	Down Regulated
ENSG00000100368	ENSG00000100368.14	CSF2RB	36913628	36940439	1	Protein_Coding	colony stimulating factor 2 receptor subunit beta [Source:HGNC Symbol;Acc:HGNC:2436]	1425.3	0.322574	0.105561	0.000208333	0.00592669	2412	1286	1282	1809	1773	1924	2021	1836	1330.25	1354.43	1317.31	1793.95	1832.14	1984.06	1790.73	1894.94	Up Regulated
ENSG00000228519	ENSG00000228519.3	RANBP1P1	25645722	25646327	-1	Protein_Coding	RANBP1 pseudogene 1 [Source:HGNC Symbol;Acc:HGNC:54908]	669.152	-0.364123	0.121371	0.000209904	0.00596305	1787	867	917	716	660	608	774	634	985.551	913.136	942.258	710.043	682.015	626.981	685.811	654.352	Down Regulated
ENSG00000101493	ENSG00000101493.11	ZNF516	76357682	76495242	-1	Protein_Coding	zinc finger protein 516 [Source:HGNC Symbol;Acc:HGNC:28990]	3364.49	0.315214	0.102892	0.000210958	0.0059846	4203	2047	2017	2944	2846	2975	3563	2921	2318	2155.93	2072.56	2919.51	2940.93	3067.87	3157.03	3014.77	Up Regulated
ENSG00000188486	ENSG00000188486.3	H2AX	119093874	119095465	-1	Protein_Coding	H2A.X variant histone [Source:HGNC Symbol;Acc:HGNC:4739]	1407.35	-0.638944	0.227059	0.000212189	0.00601113	3385	1696	1864	1077	769	891	1291	1018	1866.87	1786.25	1915.34	1068.04	794.651	918.815	1143.9	1050.68	Down Regulated
ENSG00000128245	ENSG00000128245.15	YWHAH	31944522	31957603	1	Protein_Coding	tyrosine 3-monooxygenase/tryptophan 5-monooxygenase activation protein eta [Source:HGNC Symbol;Acc:HGNC:12853]	2559.27	-0.239857	0.0750199	0.000217728	0.00609998	6335	3067	3382	2520	2587	2553	3025	2469	3493.82	3230.2	3475.15	2499.03	2673.29	2632.7	2680.33	2548.26	Down Regulated
ENSG00000203730	ENSG00000203730.2	TEDDM1	182398117	182400667	-1	Protein_Coding	transmembrane epididymal protein 1 [Source:HGNC Symbol;Acc:HGNC:30233]	61.1201	0.468278	0.162152	0.000224418	0.00624264	131	50	62	90	100	102	117	95	72.248	52.6606	63.7077	89.2512	103.336	105.184	103.669	98.0497	Up Regulated
ENSG00000108175	ENSG00000108175.17	ZMIZ1	79068966	79316519	1	Protein_Coding	zinc finger MIZ-type containing 1 [Source:HGNC Symbol;Acc:HGNC:16493]	3267.47	0.442795	0.152793	0.000224664	0.00624264	2322	1200	936	1673	1757	1857	1984	1875	1280.61	1263.86	961.781	1659.08	1815.61	1914.97	1757.94	1935.19	Up Regulated
ENSG00000138829	ENSG00000138829.12	FBN2	128257909	128659185	-1	Protein_Coding	fibrillin 2 [Source:HGNC Symbol;Acc:HGNC:3604]	2855.35	-0.236764	0.0741618	0.000226029	0.00626319	5606	3208	3131	2290	2440	2473	2770	2340	3091.77	3378.71	3217.24	2270.95	2521.39	2550.2	2454.39	2415.12	Down Regulated
ENSG00000139880	ENSG00000139880.19	CDH24	23047062	23057538	-1	Protein_Coding	cadherin 24 [Source:HGNC Symbol;Acc:HGNC:14265]	270.508	-0.632482	0.226219	0.000226956	0.00626348	712	342	307	215	173	163	230	202	392.676	360.199	315.456	213.211	178.771	168.089	203.794	208.485	Down Regulated
ENSG00000180370	ENSG00000180370.10	PAK2	196739857	196832647	1	Protein_Coding	p21 (RAC1) activated kinase 2 [Source:HGNC Symbol;Acc:HGNC:8591]	6887.39	0.176079	0.0525967	0.000227538	0.00627105	9815	5633	5505	6587	6727	6495	7343	6529	5413.08	5932.75	5656.63	6532.2	6951.39	6697.76	6506.34	6738.59	Up Regulated
ENSG00000074410	ENSG00000074410.14	CA12	63321378	63381846	-1	Protein_Coding	carbonic anhydrase 12 [Source:HGNC Symbol;Acc:HGNC:1371]	38.0365	0.720491	0.26218	0.000228466	0.00628809	31	26	26	72	63	63	73	56	17.0968	27.3835	26.7161	71.401	65.1015	64.9668	64.6824	57.7977	Up Regulated
ENSG00000114126	ENSG00000114126.17	TFDP2	141944428	142149544	-1	Protein_Coding	transcription factor Dp-2 [Source:HGNC Symbol;Acc:HGNC:11751]	344.411	0.273173	0.0883602	0.000240297	0.00654278	517	281	319	417	390	397	471	389	285.131	295.953	327.786	413.531	403.009	409.394	417.334	401.488	Up Regulated
ENSG00000185022	ENSG00000185022.12	MAFF	38200767	38216507	1	Protein_Coding	MAF bZIP transcription factor F [Source:HGNC Symbol;Acc:HGNC:6780]	1197.34	0.651299	0.235814	0.000241545	0.00656485	611	521	339	844	788	949	1036	821	336.973	548.724	348.337	836.978	814.285	978.626	917.958	847.355	Up Regulated
ENSG00000166548	ENSG00000166548.15	TK2	66508003	66552544	-1	Protein_Coding	thymidine kinase 2 [Source:HGNC Symbol;Acc:HGNC:11831]	868.473	0.267104	0.0861323	0.000243828	0.00661234	1258	769	713	988	928	954	1098	1015	693.801	809.921	732.639	979.78	958.955	983.782	972.894	1047.58	Up Regulated
ENSG00000136161	ENSG00000136161.12	RCBTB2	48488963	48533256	-1	Protein_Coding	RCC1 and BTB domain containing protein 2 [Source:HGNC Symbol;Acc:HGNC:1914]	4223.22	0.351069	0.118485	0.000245777	0.00664979	5286	3652	3637	4912	4990	4753	5826	5029	2915.29	3846.33	3737.18	4871.13	5156.45	4901.38	5162.19	5190.44	Up Regulated
ENSG00000014138	ENSG00000014138.9	POLA2	65261920	65305589	1	Protein_Coding	DNA polymerase alpha 2, accessory subunit [Source:HGNC Symbol;Acc:HGNC:30073]	199.981	-0.460591	0.161246	0.000248225	0.00668694	426	191	244	151	145	136	155	143	234.944	201.164	250.721	149.744	149.837	140.246	137.339	147.591	Down Regulated
ENSG00000060982	ENSG00000060982.15	BCAT1	24810024	24949101	-1	Protein_Coding	branched chain amino acid transaminase 1 [Source:HGNC Symbol;Acc:HGNC:976]	8440.17	0.285158	0.093301	0.00025383	0.00681082	10263	5810	4928	6939	7250	7137	8584	7092	5660.16	6119.17	5063.74	6881.27	7491.83	7359.8	7605.94	7319.66	Up Regulated
ENSG00000162929	ENSG00000162929.13	SANBR	61065871	61138034	1	Protein_Coding	SANT and BTB domain regulator of CSR [Source:HGNC Symbol;Acc:HGNC:29387]	399.262	-0.347947	0.117664	0.000257021	0.0068602	933	422	495	356	343	303	399	346	514.56	444.456	508.634	353.038	354.441	312.459	353.538	357.107	Down Regulated
ENSG00000163950	ENSG00000163950.13	SLBP	1692731	1712344	-1	Protein_Coding	stem-loop binding protein [Source:HGNC Symbol;Acc:HGNC:10904]	1625.45	-0.28567	0.0936811	0.000259628	0.00691162	4061	1889	2106	1628	1458	1508	1849	1630	2239.69	1989.52	2164.01	1614.46	1506.63	1555.08	1638.33	1682.33	Down Regulated
ENSG00000139651	ENSG00000139651.11	ZNF740	53180704	53195142	1	Protein_Coding	zinc finger protein 740 [Source:HGNC Symbol;Acc:HGNC:27465]	944.715	0.19831	0.0622279	0.000260709	0.0069313	1659	848	852	1100	1119	1055	1270	1005	914.957	893.125	875.467	1090.85	1156.33	1087.94	1125.3	1037.26	Up Regulated
ENSG00000159733	ENSG00000159733.13	ZFYVE28	2269582	2418651	-1	Protein_Coding	zinc finger FYVE-type containing 28 [Source:HGNC Symbol;Acc:HGNC:29334]	153.655	0.605406	0.222001	0.000279054	0.00730432	97	67	36	105	112	103	120	105	53.4966	70.5653	36.9916	104.126	115.736	106.215	106.327	108.371	Up Regulated
ENSG00000049541	ENSG00000049541.11	RFC2	74231499	74254458	-1	Protein_Coding	replication factor C subunit 2 [Source:HGNC Symbol;Acc:HGNC:9970]	580.008	-0.397989	0.139301	0.000289281	0.0075049	1545	637	768	509	496	491	558	508	852.085	670.897	789.154	504.765	512.545	506.328	494.422	524.308	Down Regulated
ENSG00000069956	ENSG00000069956.12	MAPK6	51952106	52067375	1	Protein_Coding	mitogen-activated protein kinase 6 [Source:HGNC Symbol;Acc:HGNC:6879]	5426.64	0.249924	0.0809665	0.000289673	0.0075049	8381	4797	4450	5703	6043	5798	6811	5799	4622.22	5052.26	4572.57	5655.55	6244.57	5979	6034.96	5985.16	Up Regulated
ENSG00000183598	ENSG00000183598.3	H3C13	149813225	149813693	-1	Protein_Coding	H3 clustered histone 13 [Source:HGNC Symbol;Acc:HGNC:25311]	494.46	-1.01673	0.388901	0.000297585	0.00764929	1676	876	1148	407	299	294	487	392	924.333	922.614	1179.62	403.614	308.974	303.178	431.511	404.584	Down Regulated
ENSG00000161981	ENSG00000161981.10	SNRNP25	53828	57669	1	Protein_Coding	small nuclear ribonucleoprotein U11/U12 subunit 25 [Source:HGNC Symbol;Acc:HGNC:14161]	496.995	-0.463348	0.167109	0.000310236	0.00786705	1450	671	818	508	454	479	562	467	799.691	706.706	840.531	503.773	469.144	493.954	497.966	481.991	Down Regulated
ENSG00000139289	ENSG00000139289.13	PHLDA1	76025447	76031776	-1	Protein_Coding	pleckstrin homology like domain family A member 1 [Source:HGNC Symbol;Acc:HGNC:8933]	18194.5	0.397361	0.140962	0.000321269	0.00805631	15167	9811	8341	14327	14388	14020	15792	13754	8364.77	10333.1	8570.74	14207.8	14867.9	14457.7	13992.7	14195.5	Up Regulated
ENSG00000118689	ENSG00000118689.15	FOXO3	108559835	108684774	1	Protein_Coding	forkhead box O3 [Source:HGNC Symbol;Acc:HGNC:3821]	5518.45	0.240972	0.0786907	0.000334578	0.00832372	7666	4435	4810	5628	5846	5696	6289	5813	4227.88	4671	4942.49	5581.18	6041	5873.82	5572.43	5999.61	Up Regulated
ENSG00000119408	ENSG00000119408.16	NEK6	124257606	124353307	1	Protein_Coding	NIMA related kinase 6 [Source:HGNC Symbol;Acc:HGNC:7749]	7214.68	0.265827	0.0884262	0.000335287	0.00832372	9512	5889	5169	7487	7383	7241	8159	7328	5245.97	6202.37	5311.37	7424.71	7629.27	7467.05	7229.36	7563.24	Up Regulated
ENSG00000161980	ENSG00000161980.5	POLR3K	46407	53608	-1	Protein_Coding	RNA polymerase III subunit K [Source:HGNC Symbol;Acc:HGNC:14121]	181.468	-0.318595	0.109229	0.000335501	0.00832372	373	179	212	160	143	136	179	146	205.714	188.525	217.839	158.669	147.77	140.246	158.605	150.687	Down Regulated
ENSG00000136026	ENSG00000136026.14	CKAP4	106237881	106304279	-1	Protein_Coding	cytoskeleton associated protein 4 [Source:HGNC Symbol;Acc:HGNC:16991]	888.74	0.384652	0.136769	0.000340811	0.00843185	1533	916	770	1256	1280	1282	1458	1297	845.467	964.743	791.209	1245.55	1322.7	1322.02	1291.88	1338.64	Up Regulated
ENSG00000122378	ENSG00000122378.14	PRXL2A	80407829	80437115	1	Protein_Coding	peroxiredoxin like 2A [Source:HGNC Symbol;Acc:HGNC:28651]	904.613	0.259916	0.0865608	0.000348131	0.00859202	1044	668	695	959	898	877	1008	852	575.778	703.546	714.143	951.021	927.954	904.378	893.149	879.351	Up Regulated
ENSG00000187240	ENSG00000187240.15	DYNC2H1	103109410	103479863	1	Protein_Coding	dynein cytoplasmic 2 heavy chain 1 [Source:HGNC Symbol;Acc:HGNC:2962]	862.175	-0.298872	0.102072	0.000353535	0.00866224	1683	734	856	615	610	605	728	595	928.193	773.058	879.577	609.883	630.347	623.887	645.052	614.1	Down Regulated
ENSG00000152270	ENSG00000152270.9	PDE3B	14643804	14872044	1	Protein_Coding	phosphodiesterase 3B [Source:HGNC Symbol;Acc:HGNC:8779]	4445.15	0.325589	0.113136	0.000355556	0.0086908	7382	4346	4513	6307	6251	6044	7263	6135	4071.26	4577.26	4637.3	6254.53	6459.51	6232.68	6435.45	6331.94	Up Regulated
ENSG00000275126	ENSG00000275126.1	H4C13	27873148	27873534	-1	Protein_Coding	H4 clustered histone 13 [Source:HGNC Symbol;Acc:HGNC:4791]	510.871	-0.770005	0.298382	0.000362799	0.00879149	1431	887	1037	498	381	390	501	451	789.213	934.2	1065.56	493.857	393.709	402.175	443.916	465.478	Down Regulated
ENSG00000171658	ENSG00000171658.8	NMRAL2P	185959943	185980872	1	Protein_Coding	NmrA like redox sensor 2, pseudogene [Source:HGNC Symbol;Acc:HGNC:52332]	54.3303	0.80403	0.312948	0.000367325	0.00886117	82	31	24	133	127	113	111	114	45.2239	32.6496	24.661	131.893	131.236	116.528	98.3527	117.66	Up Regulated
ENSG00000157240	ENSG00000157240.3	FZD1	91264433	91271326	1	Protein_Coding	frizzled class receptor 1 [Source:HGNC Symbol;Acc:HGNC:4038]	555.549	-0.303436	0.105038	0.000385099	0.00921335	1102	655	640	463	427	441	531	505	607.765	689.854	657.628	459.148	441.243	454.767	470.498	521.211	Down Regulated
ENSG00000276903	ENSG00000276903.1	H2AC16	27865317	27865798	1	Protein_Coding	H2A clustered histone 16 [Source:HGNC Symbol;Acc:HGNC:4730]	381.606	-1.02663	0.410839	0.000399659	0.0094835	831	533	584	234	171	162	252	193	458.306	561.362	600.086	232.053	176.704	167.057	223.287	199.196	Down Regulated
ENSG00000164466	ENSG00000164466.13	SFXN1	175477062	175529742	1	Protein_Coding	sideroflexin 1 [Source:HGNC Symbol;Acc:HGNC:16085]	865.454	-0.221555	0.0727178	0.000403251	0.00954642	2161	1053	1142	937	931	878	1018	907	1191.82	1109.03	1173.45	929.204	962.055	905.41	902.009	936.116	Down Regulated
ENSG00000221955	ENSG00000221955.10	SLC12A8	125082636	125212864	-1	Protein_Coding	solute carrier family 12 member 8 [Source:HGNC Symbol;Acc:HGNC:15595]	1077.38	0.619522	0.2406	0.000414065	0.0096692	467	581	540	1179	1101	1107	1132	1065	257.556	611.917	554.874	1169.19	1137.73	1141.56	1003.02	1099.19	Up Regulated
ENSG00000116251	ENSG00000116251.11	RPL22	6185020	6209389	-1	Protein_Coding	ribosomal protein L22 [Source:HGNC Symbol;Acc:HGNC:10315]	2044.55	0.205046	0.0663523	0.000414149	0.0096692	4447	2243	2149	2634	2705	2668	3264	2783	2452.57	2362.36	2208.19	2612.09	2795.23	2751.29	2892.1	2872.34	Up Regulated
ENSG00000119640	ENSG00000119640.9	ACYP1	75053237	75069483	-1	Protein_Coding	acylphosphatase 1 [Source:HGNC Symbol;Acc:HGNC:179]	149.875	-0.345075	0.123182	0.000421304	0.00981368	354	166	185	143	125	122	165	126	195.235	174.833	190.096	141.81	129.17	125.809	146.2	130.045	Down Regulated
ENSG00000148358	ENSG00000148358.19	GPR107	130053426	130140169	1	Protein_Coding	G protein-coupled receptor 107 [Source:HGNC Symbol;Acc:HGNC:17830]	1905.52	0.129321	0.0391171	0.000431991	0.00999385	3330	1691	1827	2058	1999	1997	2285	2077	1836.53	1780.98	1877.32	2040.88	2065.68	2059.34	2024.65	2143.68	Up Regulated
ENSG00000147872	ENSG00000147872.10	PLIN2	19108375	19149290	-1	Protein_Coding	perilipin 2 [Source:HGNC Symbol;Acc:HGNC:248]	12283.6	0.245503	0.0830508	0.000452827	0.010393	23009	12600	11840	16549	16368	15782	18681	16075	12689.7	13270.5	12166.1	16411.3	16914	16274.7	16552.5	16591	Up Regulated
ENSG00000151876	ENSG00000151876.13	FBXO4	41925254	41941743	1	Protein_Coding	F-box protein 4 [Source:HGNC Symbol;Acc:HGNC:13583]	699.518	-0.257637	0.0881582	0.000465067	0.0105902	1365	653	641	567	551	520	610	510	752.813	687.748	658.655	562.283	569.379	536.234	540.497	526.372	Down Regulated
ENSG00000169689	ENSG00000169689.15	CENPX	82018702	82024107	-1	Protein_Coding	centromere protein X [Source:HGNC Symbol;Acc:HGNC:11422]	360.257	-0.489341	0.188307	0.000475544	0.0107804	1032	489	516	337	267	327	375	334	569.16	515.021	530.213	334.196	275.906	337.208	332.273	344.722	Down Regulated
ENSG00000168710	ENSG00000168710.18	AHCYL1	109984765	110023742	1	Protein_Coding	adenosylhomocysteinase like 1 [Source:HGNC Symbol;Acc:HGNC:344]	2594.47	0.208912	0.0690163	0.000489224	0.0109924	3681	1936	1981	2336	2334	2428	2859	2393	2030.11	2039.02	2035.56	2316.56	2411.85	2503.8	2533.25	2469.82	Up Regulated
ENSG00000104205	ENSG00000104205.14	SGK3	66712734	66862022	1	Protein_Coding	serum/glucocorticoid regulated kinase family member 3 [Source:HGNC Symbol;Acc:HGNC:10812]	2238.81	0.236435	0.0801923	0.000497298	0.0111119	4442	2240	2177	2944	2981	2831	3457	2875	2449.81	2359.2	2236.96	2919.51	3080.44	2919.38	3063.11	2967.29	Up Regulated
ENSG00000120694	ENSG00000120694.19	HSPH1	31134973	31162388	-1	Protein_Coding	heat shock protein family H (Hsp110) member 1 [Source:HGNC Symbol;Acc:HGNC:16969]	4180.52	-0.315763	0.113921	0.000509756	0.0113284	9002	4321	4207	3154	3349	3054	3817	3011	4964.7	4550.93	4322.88	3127.76	3460.71	3149.34	3382.09	3107.66	Down Regulated
ENSG00000165671	ENSG00000165671.20	NSD1	177131830	177300213	1	Protein_Coding	nuclear receptor binding SET domain protein 1 [Source:HGNC Symbol;Acc:HGNC:14234]	5158.58	0.145757	0.0454923	0.000515757	0.0114243	7659	4141	4091	4913	4768	4825	5465	4809	4224.02	4361.35	4203.68	4872.12	4927.04	4975.63	4842.32	4963.38	Up Regulated
ENSG00000066455	ENSG00000066455.13	GOLGA5	92794305	92839947	1	Protein_Coding	golgin A5 [Source:HGNC Symbol;Acc:HGNC:4428]	1292.52	0.230572	0.0782456	0.000522742	0.0115162	2366	1296	1281	1512	1552	1574	1912	1612	1304.88	1364.96	1316.28	1499.42	1603.77	1623.14	1694.15	1663.75	Up Regulated
ENSG00000113368	ENSG00000113368.12	LMNB1	126776623	126837020	1	Protein_Coding	lamin B1 [Source:HGNC Symbol;Acc:HGNC:6637]	2212.16	-0.283924	0.100833	0.000534074	0.0117404	3651	1971	2299	1563	1545	1486	1825	1556	2013.57	2075.88	2362.32	1550	1596.54	1532.39	1617.06	1605.95	Down Regulated
ENSG00000155158	ENSG00000155158.20	TTC39B	15163622	15307360	-1	Protein_Coding	tetratricopeptide repeat domain 39B [Source:HGNC Symbol;Acc:HGNC:23704]	2488.17	0.365868	0.136674	0.000534974	0.0117474	3538	2130	1858	2911	2942	2963	3471	2925	1951.25	2243.34	1909.18	2886.78	3040.13	3055.5	3075.51	3018.9	Up Regulated
ENSG00000135473	ENSG00000135473.15	PAN2	56316223	56334053	-1	Protein_Coding	poly(A) specific ribonuclease subunit PAN2 [Source:HGNC Symbol;Acc:HGNC:20074]	1112.99	0.244229	0.0845669	0.00055977	0.0120846	1831	1082	1106	1507	1413	1412	1667	1365	1009.82	1139.58	1136.46	1494.46	1460.13	1456.08	1477.06	1408.82	Up Regulated
ENSG00000244227	ENSG00000244227.7	LRRC77P	167864773	167924011	1	Protein_Coding	leucine rich repeat containing 77, pseudogene [Source:HGNC Symbol;Acc:HGNC:50536]	77.5815	0.867803	0.364255	0.000560438	0.0120846	51	119	118	395	416	336	356	310	28.1271	125.332	121.25	391.714	429.876	346.489	315.437	319.952	Up Regulated
ENSG00000163694	ENSG00000163694.15	RBM47	40423267	40630875	-1	Protein_Coding	RNA binding motif protein 47 [Source:HGNC Symbol;Acc:HGNC:30358]	3080.09	0.201919	0.0672218	0.000562746	0.0120846	6557	3193	3217	3895	3851	4067	4766	4054	3616.26	3362.91	3305.61	3862.59	3979.46	4193.96	4222.96	4184.14	Up Regulated
ENSG00000001084	ENSG00000001084.12	GCLC	53497341	53616970	-1	Protein_Coding	glutamate-cysteine ligase catalytic subunit [Source:HGNC Symbol;Acc:HGNC:4311]	3728.43	0.356258	0.133309	0.00056282	0.0120846	8717	3592	3537	5537	5542	5555	6961	6025	4807.52	3783.14	3634.42	5490.93	5726.86	5728.42	6167.86	6218.41	Up Regulated
ENSG00000013573	ENSG00000013573.17	DDX11	31073860	31104799	1	Protein_Coding	DEAD/H-box helicase 11 [Source:HGNC Symbol;Acc:HGNC:2736]	962.188	-0.429732	0.166699	0.00057137	0.0121801	1913	1009	1268	850	690	760	816	722	1055.04	1062.69	1302.93	842.928	713.016	783.726	723.025	745.177	Down Regulated
ENSG00000165046	ENSG00000165046.12	LETM2	38386207	38409527	1	Protein_Coding	leucine zipper and EF-hand containing transmembrane protein 2 [Source:HGNC Symbol;Acc:HGNC:14648]	274.68	-0.305589	0.110001	0.000579645	0.0122849	558	306	347	240	215	214	290	246	307.743	322.283	356.558	238.003	222.172	220.681	256.957	253.897	Down Regulated
ENSG00000270882	ENSG00000270882.2	H4C14	149832657	149839767	1	Protein_Coding	H4 clustered histone 14 [Source:HGNC Symbol;Acc:HGNC:4794]	17.87	-1.14772	0.47597	0.000580524	0.0122849	40	22	25	7	12	7	8	2	22.0604	23.1707	25.6886	6.94176	12.4003	7.21853	7.08848	2.0642	Down Regulated
ENSG00000184743	ENSG00000184743.12	ATL3	63624087	63671921	-1	Protein_Coding	atlastin GTPase 3 [Source:HGNC Symbol;Acc:HGNC:24526]	4987.87	-0.218239	0.074068	0.000580617	0.0122849	9670	5577	5984	4681	4585	4383	5142	4546	5333.11	5873.77	6148.82	4642.05	4737.94	4519.83	4556.12	4691.93	Down Regulated
ENSG00000226479	ENSG00000226479.4	TMEM185B	120217479	120223400	-1	Protein_Coding	transmembrane protein 185B [Source:HGNC Symbol;Acc:HGNC:18896]	1661.68	0.188223	0.0620878	0.000587132	0.0123969	2760	1392	1327	1704	1781	1624	1960	1693	1522.17	1466.07	1363.55	1689.82	1840.41	1674.7	1736.68	1747.35	Up Regulated
ENSG00000116741	ENSG00000116741.8	RGS2	192809039	192812275	1	Protein_Coding	regulator of G protein signaling 2 [Source:HGNC Symbol;Acc:HGNC:9998]	3594.37	0.340665	0.127427	0.000598347	0.0125684	7701	3703	3629	5835	5693	6079	6418	5435	4247.19	3900.05	3728.96	5786.45	5882.9	6268.78	5686.73	5609.47	Up Regulated
ENSG00000170145	ENSG00000170145.5	SIK2	111602449	111730855	1	Protein_Coding	salt inducible kinase 2 [Source:HGNC Symbol;Acc:HGNC:21680]	1750.11	-0.158846	0.05101	0.00060893	0.0127643	3182	1647	1714	1464	1456	1471	1635	1430	1754.91	1734.64	1761.21	1451.82	1504.57	1516.92	1448.71	1475.91	Down Regulated
ENSG00000011021	ENSG00000011021.23	CLCN6	11806096	11848079	1	Protein_Coding	chloride voltage-gated channel 6 [Source:HGNC Symbol;Acc:HGNC:2024]	985.023	0.286997	0.103968	0.00061416	0.012817	1454	721	799	993	1056	1051	1114	1062	801.897	759.366	821.007	984.738	1091.22	1083.81	987.071	1096.09	Up Regulated
ENSG00000065154	ENSG00000065154.11	OAT	124397303	124418976	-1	Protein_Coding	ornithine aminotransferase [Source:HGNC Symbol;Acc:HGNC:8091]	828.927	0.231452	0.0800549	0.000614598	0.012817	1273	716	618	877	864	832	1016	879	702.074	754.1	635.022	869.703	892.82	857.974	900.237	907.217	Up Regulated
ENSG00000147570	ENSG00000147570.9	DNAJC5B	66021553	66101245	1	Protein_Coding	DnaJ heat shock protein family (Hsp40) member C5 beta [Source:HGNC Symbol;Acc:HGNC:24138]	274.378	0.478506	0.191825	0.000622672	0.0129322	294	286	257	491	433	427	528	448	162.144	301.219	264.079	486.915	447.443	440.33	467.84	462.382	Up Regulated
ENSG00000077713	ENSG00000077713.19	SLC25A43	119399336	119454478	1	Protein_Coding	solute carrier family 25 member 43 [Source:HGNC Symbol;Acc:HGNC:30557]	522.407	0.208357	0.0706439	0.000626772	0.0130041	983	493	534	640	636	609	740	681	542.136	519.234	548.708	634.675	657.215	628.012	655.684	702.861	Up Regulated
ENSG00000106003	ENSG00000106003.13	LFNG	2512529	2529177	1	Protein_Coding	LFNG O-fucosylpeptide 3-beta-N-acetylglucosaminyltransferase [Source:HGNC Symbol;Acc:HGNC:6560]	216.155	0.484536	0.195227	0.000643963	0.0132525	368	233	164	335	316	356	417	360	202.956	245.399	168.517	332.213	326.541	367.114	369.487	371.557	Up Regulated
ENSG00000198890	ENSG00000198890.8	PRMT6	107056674	107067636	1	Protein_Coding	protein arginine methyltransferase 6 [Source:HGNC Symbol;Acc:HGNC:18241]	787.569	-0.202957	0.0688833	0.000667655	0.0136433	1857	1025	1041	914	805	827	1035	846	1024.16	1079.54	1069.67	906.396	831.852	852.818	917.072	873.158	Down Regulated
ENSG00000156110	ENSG00000156110.13	ADK	74151202	74709963	1	Protein_Coding	adenosine kinase [Source:HGNC Symbol;Acc:HGNC:257]	1079.88	0.328344	0.123873	0.000670036	0.0136507	1540	973	948	1405	1391	1272	1590	1365	849.327	1024.78	974.111	1393.31	1437.4	1311.71	1408.84	1408.82	Up Regulated
ENSG00000075275	ENSG00000075275.16	CELSR1	46360834	46537620	-1	Protein_Coding	cadherin EGF LAG seven-pass G-type receptor 1 [Source:HGNC Symbol;Acc:HGNC:1850]	1376.33	0.421236	0.166872	0.000672217	0.0136652	1480	786	595	1042	1123	1155	1321	1148	816.237	827.825	611.388	1033.33	1160.46	1191.06	1170.49	1184.85	Up Regulated
ENSG00000145354	ENSG00000145354.12	CISD2	102868974	102892807	1	Protein_Coding	CDGSH iron sulfur domain 2 [Source:HGNC Symbol;Acc:HGNC:24212]	522.747	-0.252558	0.0899972	0.000680703	0.0137851	1326	617	682	591	527	505	621	547	731.304	649.832	700.785	586.083	544.579	520.765	550.243	564.56	Down Regulated
ENSG00000145868	ENSG00000145868.16	FBXO38	148383935	148442836	1	Protein_Coding	F-box protein 38 [Source:HGNC Symbol;Acc:HGNC:28844]	2904.57	0.226407	0.0788955	0.00068371	0.0138322	5364	3357	3297	4387	4225	4189	4746	4022	2958.31	3535.64	3387.81	4350.5	4365.93	4319.77	4205.24	4151.11	Up Regulated
ENSG00000158683	ENSG00000158683.8	PKD1L1	47740202	47948466	-1	Protein_Coding	polycystin 1 like 1, transient receptor potential channel interacting [Source:HGNC Symbol;Acc:HGNC:18053]	88.0894	0.541994	0.228384	0.000737139	0.0146648	84	94	70	159	155	142	152	146	46.3269	99.002	71.9281	157.677	160.17	146.433	134.681	150.687	Up Regulated
ENSG00000181045	ENSG00000181045.15	SLC26A11	80219699	80253500	1	Protein_Coding	solute carrier family 26 member 11 [Source:HGNC Symbol;Acc:HGNC:14471]	604.802	0.495187	0.204907	0.00074466	0.014771	930	391	367	853	772	770	912	868	512.905	411.806	377.109	845.903	797.751	794.038	808.087	895.864	Up Regulated
ENSG00000123908	ENSG00000123908.12	AGO2	140520156	140635633	-1	Protein_Coding	argonaute RISC catalytic component 2 [Source:HGNC Symbol;Acc:HGNC:3263]	6815.25	0.286307	0.106603	0.000761524	0.0150614	5278	3413	3068	3952	4134	4203	4836	4162	2910.88	3594.62	3152.5	3919.12	4271.9	4334.21	4284.99	4295.61	Up Regulated
ENSG00000213371	ENSG00000213371.4	NAP1L1P3	120805866	120806745	1	Protein_Coding	nucleosome assembly protein 1 like 1 pseudogene 3 [Source:HGNC Symbol;Acc:HGNC:38007]	659.934	0.257217	0.0935529	0.000765671	0.0151183	919	522	487	649	709	654	710	653	506.839	549.777	500.414	643.6	732.65	674.417	629.103	673.962	Up Regulated
ENSG00000138821	ENSG00000138821.13	SLC39A8	102251080	102431258	-1	Protein_Coding	solute carrier family 39 member 8 [Source:HGNC Symbol;Acc:HGNC:20862]	1193.16	-0.278912	0.103342	0.000772541	0.0152348	3164	1505	1448	1192	1145	1155	1373	1149	1744.98	1585.09	1487.88	1182.08	1183.19	1191.06	1216.56	1185.88	Down Regulated
ENSG00000073150	ENSG00000073150.13	PANX2	50170731	50180295	1	Protein_Coding	pannexin 2 [Source:HGNC Symbol;Acc:HGNC:8600]	51.5781	0.78796	0.34509	0.000776702	0.015302	44	14	9	44	37	51	48	51	24.2665	14.745	9.24789	43.6339	38.2342	52.5921	42.5309	52.6372	Up Regulated
ENSG00000104324	ENSG00000104324.16	CPQ	96645242	97149654	1	Protein_Coding	carboxypeptidase Q [Source:HGNC Symbol;Acc:HGNC:16910]	2057.23	0.183479	0.0621068	0.000783385	0.0153592	3444	1943	1990	2328	2269	2310	2813	2274	1899.4	2046.39	2044.81	2308.63	2344.69	2382.11	2492.49	2347	Up Regulated
ENSG00000176014	ENSG00000176014.12	TUBB6	12307669	12344320	1	Protein_Coding	tubulin beta 6 class V [Source:HGNC Symbol;Acc:HGNC:20776]	3320.03	-0.245763	0.0887244	0.000790185	0.0154383	7397	3866	3700	3080	2750	3021	3548	3101	4079.53	4071.72	3801.91	3054.37	2841.73	3115.31	3143.74	3200.55	Down Regulated
ENSG00000048707	ENSG00000048707.15	VPS13D	12230030	12512047	1	Protein_Coding	vacuolar protein sorting 13 homolog D [Source:HGNC Symbol;Acc:HGNC:23595]	4268.35	0.166633	0.0554408	0.000792623	0.0154657	5928	3462	3521	4104	4019	4046	4662	4008	3269.36	3646.22	3617.98	4069.85	4153.06	4172.31	4130.81	4136.66	Up Regulated
ENSG00000101412	ENSG00000101412.13	E2F1	33675477	33686385	-1	Protein_Coding	E2F transcription factor 1 [Source:HGNC Symbol;Acc:HGNC:3113]	875.74	-0.501683	0.210921	0.000805913	0.0156648	2163	952	1175	707	557	638	802	689	1192.92	1002.66	1207.36	701.118	575.58	657.917	710.62	711.118	Down Regulated
ENSG00000184260	ENSG00000184260.5	H2AC20	149886918	149887411	1	Protein_Coding	H2A clustered histone 20 [Source:HGNC Symbol;Acc:HGNC:4738]	1936.98	-0.513756	0.217943	0.000827039	0.0159685	5268	3262	3620	2065	1762	1825	2432	1821	2905.36	3435.58	3719.71	2047.82	1820.77	1881.97	2154.9	1879.46	Down Regulated
ENSG00000108384	ENSG00000108384.15	RAD51C	58692573	58735611	1	Protein_Coding	RAD51 paralog C [Source:HGNC Symbol;Acc:HGNC:9820]	407.404	-0.284025	0.106765	0.000837125	0.016061	835	425	478	322	314	310	400	351	460.512	447.615	491.166	319.321	324.474	319.678	354.424	362.268	Down Regulated
ENSG00000133739	ENSG00000133739.16	LRRCC1	85107215	85146080	1	Protein_Coding	leucine rich repeat and coiled-coil centrosomal protein 1 [Source:HGNC Symbol;Acc:HGNC:29373]	566.957	-0.322169	0.124801	0.000838157	0.016061	1404	686	774	576	574	491	618	524	774.322	722.504	795.319	571.208	593.147	506.328	547.585	540.821	Down Regulated
ENSG00000104765	ENSG00000104765.16	BNIP3L	26383054	26505636	1	Protein_Coding	BCL2 interacting protein 3 like [Source:HGNC Symbol;Acc:HGNC:1085]	1550.71	0.26662	0.0993147	0.000864145	0.0164349	2307	1399	1452	1806	1877	1857	2121	1708	1272.34	1473.44	1491.99	1790.97	1939.61	1914.97	1879.33	1762.83	Up Regulated
ENSG00000128918	ENSG00000128918.15	ALDH1A2	57953424	58497866	-1	Protein_Coding	aldehyde dehydrogenase 1 family member A2 [Source:HGNC Symbol;Acc:HGNC:15472]	678.836	-0.332371	0.130427	0.000865331	0.0164421	1592	1057	1012	746	666	734	753	713	878.006	1113.25	1039.87	739.793	688.215	756.914	667.203	735.888	Down Regulated
ENSG00000164675	ENSG00000164675.11	IQUB	123452193	123535077	-1	Protein_Coding	IQ motif and ubiquitin domain containing [Source:HGNC Symbol;Acc:HGNC:21995]	24.8561	-0.939586	0.424023	0.000866242	0.016444	84	30	35	17	10	12	21	15	46.3269	31.5964	35.964	16.8586	10.3336	12.3746	18.6073	15.4815	Down Regulated
ENSG00000151553	ENSG00000151553.15	FHIP2A	114821744	114899832	1	Protein_Coding	FHF complex subunit HOOK interacting protein 2A [Source:HGNC Symbol;Acc:HGNC:29320]	451.078	0.269282	0.101008	0.000883679	0.0166454	510	312	340	422	420	417	480	406	281.271	328.602	349.365	418.489	434.01	430.018	425.309	419.033	Up Regulated
ENSG00000243317	ENSG00000243317.8	STMP1	135662496	135693418	1	Protein_Coding	short transmembrane mitochondrial protein 1 [Source:HGNC Symbol;Acc:HGNC:41909]	1067.32	0.218446	0.0778548	0.000884228	0.0166454	1683	978	923	1106	1131	1130	1344	1200	928.193	1030.04	948.423	1096.8	1168.73	1165.28	1190.86	1238.52	Up Regulated
ENSG00000149679	ENSG00000149679.11	CABLES2	62388634	62407285	-1	Protein_Coding	Cdk5 and Abl enzyme substrate 2 [Source:HGNC Symbol;Acc:HGNC:16143]	369.014	-0.342419	0.135943	0.000902451	0.0169486	632	308	367	244	229	265	254	227	348.555	324.39	377.109	241.97	236.639	273.273	225.059	234.287	Down Regulated
ENSG00000110422	ENSG00000110422.12	HIPK3	33256672	33357023	1	Protein_Coding	homeodomain interacting protein kinase 3 [Source:HGNC Symbol;Acc:HGNC:4915]	14773.3	0.17826	0.0609082	0.000902835	0.0169486	29660	15543	16658	18088	18910	18426	22233	19061	16357.8	16370.1	17116.8	17937.5	19540.8	19001.2	19699.8	19672.9	Up Regulated
ENSG00000170537	ENSG00000170537.13	TMC7	18983934	19063942	1	Protein_Coding	transmembrane channel like 7 [Source:HGNC Symbol;Acc:HGNC:23000]	53.9799	-0.637052	0.283564	0.0009289	0.0173737	175	97	90	57	51	47	59	43	96.5145	102.162	92.4789	56.5258	52.7012	48.4673	52.2775	44.3804	Down Regulated
ENSG00000173905	ENSG00000173905.8	GOLIM4	168008689	168095924	-1	Protein_Coding	golgi integral membrane protein 4 [Source:HGNC Symbol;Acc:HGNC:15448]	2832.74	0.222483	0.0803039	0.000949129	0.0176999	5530	3355	3054	3951	3859	4053	4602	3938	3049.86	3533.53	3138.12	3918.13	3987.72	4179.53	4077.65	4064.42	Up Regulated
ENSG00000146281	ENSG00000146281.6	PM20D2	89146055	89165565	1	Protein_Coding	peptidase M20 domain containing 2 [Source:HGNC Symbol;Acc:HGNC:21408]	804.82	-0.271946	0.102885	0.000949828	0.0176999	1744	866	937	788	713	673	863	675	961.836	912.082	962.808	781.444	736.783	694.01	764.67	696.669	Down Regulated
ENSG00000168298	ENSG00000168298.6	H1-4	26156329	26157115	1	Protein_Coding	H1.4 linker histone, cluster member [Source:HGNC Symbol;Acc:HGNC:4718]	3567.9	-0.644188	0.290308	0.000952929	0.0177414	9461	5621	6063	3176	2626	2839	3352	2858	5217.85	5920.11	6230	3149.58	2713.59	2927.63	2970.07	2949.75	Down Regulated
ENSG00000135766	ENSG00000135766.8	EGLN1	231363751	231422287	-1	Protein_Coding	egl-9 family hypoxia inducible factor 1 [Source:HGNC Symbol;Acc:HGNC:1232]	3619.21	-0.222911	0.0808345	0.000983387	0.0181587	7940	4353	4313	3501	3546	3366	3902	3394	4379	4584.64	4431.8	3471.87	3664.28	3471.08	3457.41	3502.95	Down Regulated
ENSG00000156500	ENSG00000156500.15	PABIR3	134796395	134854835	1	Protein_Coding	PABIR family member 3 [Source:HGNC Symbol;Acc:HGNC:25202]	254.738	-0.326482	0.129937	0.00098479	0.0181681	460	243	286	196	188	181	205	189	253.695	255.931	293.877	194.369	194.271	186.651	181.642	195.067	Down Regulated
ENSG00000072274	ENSG00000072274.13	TFRC	196027183	196082096	-1	Protein_Coding	transferrin receptor [Source:HGNC Symbol;Acc:HGNC:11763]	9275.26	0.225085	0.0818801	0.000988972	0.0182121	14171	8769	8318	10042	10149	10176	12176	10534	7815.47	9235.62	8547.11	9958.45	10487.5	10493.7	10788.7	10872.2	Up Regulated
ENSG00000278129	ENSG00000278129.2	ZNF8	58278955	58302791	1	Protein_Coding	zinc finger protein 8 [Source:HGNC Symbol;Acc:HGNC:13154]	516.308	0.223978	0.0817255	0.00100884	0.0184774	739	465	447	572	552	572	621	564	407.567	489.744	459.312	567.241	570.413	589.857	550.243	582.105	Up Regulated
ENSG00000187801	ENSG00000187801.15	ZFP69B	40450102	40463718	1	Protein_Coding	ZFP69 zinc finger protein B [Source:HGNC Symbol;Acc:HGNC:28053]	1552.76	0.283612	0.109617	0.00101096	0.0184996	1601	908	1002	1266	1344	1312	1435	1167	882.969	956.317	1029.6	1255.47	1388.83	1352.96	1271.5	1204.46	Up Regulated
ENSG00000145936	ENSG00000145936.9	KCNMB1	170374671	170389634	-1	Protein_Coding	potassium calcium-activated channel subfamily M regulatory beta subunit 1 [Source:HGNC Symbol;Acc:HGNC:6285]	1281.86	-0.394171	0.165012	0.00102063	0.0186431	2650	1844	1801	1147	1198	1099	1197	1079	1461.5	1942.12	1850.61	1137.46	1237.96	1133.31	1060.61	1113.64	Down Regulated
ENSG00000244462	ENSG00000244462.8	RBM12	35648925	35664956	-1	Protein_Coding	RNA binding motif protein 12 [Source:HGNC Symbol;Acc:HGNC:9898]	2860.4	0.146679	0.0473818	0.00103103	0.0187655	5710	2840	2805	3434	3462	3217	3874	3420	3149.13	2991.12	2882.26	3405.43	3577.48	3317.43	3432.6	3529.79	Up Regulated
ENSG00000034713	ENSG00000034713.8	GABARAPL2	75566375	75577881	1	Protein_Coding	GABA type A receptor associated protein like 2 [Source:HGNC Symbol;Acc:HGNC:13291]	1038.88	0.239178	0.0889146	0.00103889	0.0188916	1545	913	946	1120	1135	1103	1401	1138	852.085	961.583	972.056	1110.68	1172.86	1137.43	1241.37	1174.53	Up Regulated
ENSG00000135677	ENSG00000135677.11	GNS	64713445	64759431	-1	Protein_Coding	glucosamine (N-acetyl)-6-sulfatase [Source:HGNC Symbol;Acc:HGNC:4422]	12190.2	0.205723	0.0738634	0.00105698	0.0190882	15485	8920	8748	10898	11024	10722	12482	10626	8540.15	9394.66	8988.95	10807.3	11391.7	11056.7	11059.8	10967.1	Up Regulated
ENSG00000135253	ENSG00000135253.13	KCP	128862042	128910719	-1	Protein_Coding	kielin cysteine rich BMP regulator [Source:HGNC Symbol;Acc:HGNC:17585]	279.844	0.617205	0.283432	0.00106768	0.0192025	238	180	226	510	439	465	512	434	131.26	189.578	232.225	505.757	453.644	479.516	453.663	447.932	Up Regulated
ENSG00000134574	ENSG00000134574.11	DDB2	47214465	47239217	1	Protein_Coding	damage specific DNA binding protein 2 [Source:HGNC Symbol;Acc:HGNC:2718]	433.85	-0.31532	0.122066	0.00108105	0.0193662	852	476	525	412	345	371	406	370	469.888	501.329	539.46	408.572	356.508	382.582	359.74	381.878	Down Regulated
ENSG00000112110	ENSG00000112110.10	MRPL18	159789812	159798436	1	Protein_Coding	mitochondrial ribosomal protein L18 [Source:HGNC Symbol;Acc:HGNC:14477]	1669.58	-0.188392	0.066461	0.0010812	0.0193662	3601	1859	1910	1719	1552	1577	1835	1654	1985.99	1957.92	1962.61	1704.7	1603.77	1626.23	1625.92	1707.1	Down Regulated
ENSG00000064995	ENSG00000064995.17	TAF11	34877462	34889192	-1	Protein_Coding	TATA-box binding protein associated factor 11 [Source:HGNC Symbol;Acc:HGNC:11544]	1252.03	-0.152105	0.0514718	0.0010915	0.019482	2709	1505	1453	1398	1284	1271	1452	1336	1494.04	1585.09	1493.02	1386.37	1326.83	1310.68	1286.56	1378.89	Down Regulated
ENSG00000010704	ENSG00000010704.18	HFE	26087281	26098343	1	Protein_Coding	homeostatic iron regulator [Source:HGNC Symbol;Acc:HGNC:4886]	49.4935	0.552077	0.251698	0.00110718	0.0196755	47	27	34	72	62	62	71	65	25.921	28.4367	34.9365	71.401	64.0681	63.9355	62.9103	67.0866	Up Regulated
ENSG00000157193	ENSG00000157193.16	LRP8	53242364	53328469	-1	Protein_Coding	LDL receptor related protein 8 [Source:HGNC Symbol;Acc:HGNC:6700]	2892.4	0.166919	0.0577703	0.00113988	0.0201507	4756	2441	2507	3217	3191	3017	3357	3001	2622.99	2570.89	2576.05	3190.23	3297.44	3111.19	2974.5	3097.34	Up Regulated
ENSG00000143799	ENSG00000143799.13	PARP1	226360210	226408154	-1	Protein_Coding	poly(ADP-ribose) polymerase 1 [Source:HGNC Symbol;Acc:HGNC:270]	11783.1	-0.207167	0.0753909	0.00116378	0.0205077	23737	12344	12962	10555	9792	10306	11935	10583	13091.2	13000.9	13319	10467.2	10118.6	10627.7	10575.1	10922.7	Down Regulated
ENSG00000135315	ENSG00000135315.12	CEP162	84124241	84227643	-1	Protein_Coding	centrosomal protein 162 [Source:HGNC Symbol;Acc:HGNC:21107]	539.764	-0.27364	0.107266	0.00119762	0.0209166	1245	588	661	516	498	475	563	472	686.631	619.289	679.206	511.707	514.612	489.829	498.852	487.152	Down Regulated
ENSG00000275746	ENSG00000275746.1	KLF13	31478417	31529455	1	Protein_Coding	Kruppel like factor 13 [Source:HGNC Symbol;Acc:HGNC:13672]	485.905	0.291253	0.116521	0.0012081	0.0210273	683	456	439	573	612	568	635	590	376.682	480.265	451.092	568.233	632.414	585.732	562.648	608.94	Up Regulated
ENSG00000274897	ENSG00000274897.3		NA	NA	NA	Protein_Coding		22.9865	-0.701015	0.320784	0.00122634	0.0211765	48	24	23	16	8	15	15	12	26.4725	25.2771	23.6335	15.8669	8.26685	15.4683	13.2909	12.3852	Down Regulated
ENSG00000124207	ENSG00000124207.17	CSE1L	49046246	49096960	1	Protein_Coding	chromosome segregation 1 like [Source:HGNC Symbol;Acc:HGNC:2431]	2382.93	-0.245193	0.0937841	0.00123101	0.0212234	5682	2565	2777	2176	2205	2028	2538	2182	3133.69	2701.49	2853.49	2157.9	2278.55	2091.31	2248.82	2252.05	Down Regulated
ENSG00000254331	ENSG00000254331.1	CKS1BP7	80644939	80645173	-1	Protein_Coding	CDC28 protein kinase regulatory subunit 1B pseudogene 7 [Source:HGNC Symbol;Acc:HGNC:1999]	57.3046	-0.597564	0.280942	0.00124407	0.0213787	124	82	86	45	46	43	40	39	68.3874	86.3635	88.3688	44.6256	47.5344	44.3424	35.4424	40.252	Down Regulated
ENSG00000184226	ENSG00000184226.15	PCDH9	66302834	67230445	-1	Protein_Coding	protocadherin 9 [Source:HGNC Symbol;Acc:HGNC:8661]	373.544	-0.560654	0.261242	0.0012477	0.0214229	604	252	315	156	167	130	214	150	333.113	265.41	323.676	154.702	172.571	134.058	189.617	154.815	Down Regulated
ENSG00000257586	ENSG00000257586.1		38994803	38996882	-1	Protein_Coding	maltase-glucoamylase (alpha-glucosidase) (MGAM) pseudogene	11.5302	0.781247	0.385568	0.00125663	0.0215148	12	11	17	29	37	25	37	29	6.61813	11.5853	17.4682	28.7587	38.2342	25.7805	32.7842	29.9309	Up Regulated
ENSG00000100122	ENSG00000100122.7	CRYBB1	26599278	26618027	-1	Protein_Coding	crystallin beta B1 [Source:HGNC Symbol;Acc:HGNC:2397]	287.582	-0.567103	0.26581	0.00125941	0.0215148	685	388	354	216	199	200	249	180	377.785	408.647	363.75	214.203	205.638	206.244	220.629	185.778	Down Regulated
ENSG00000107263	ENSG00000107263.18	RAPGEF1	131576770	131740076	-1	Protein_Coding	Rap guanine nucleotide exchange factor 1 [Source:HGNC Symbol;Acc:HGNC:4568]	7676.9	0.340445	0.142831	0.00126853	0.0216525	8950	5335	5037	8365	7779	8126	8644	7883	4936.03	5618.89	5175.74	8295.4	8038.48	8379.68	7659.1	8136.06	Up Regulated
ENSG00000168300	ENSG00000168300.14	PCMTD1	51817575	51899186	-1	Protein_Coding	protein-L-isoaspartate (D-aspartate) O-methyltransferase domain containing 1 [Source:HGNC Symbol;Acc:HGNC:30483]	1306.9	0.266509	0.105096	0.001294	0.0219947	1858	1170	1190	1520	1573	1499	1746	1457	1024.71	1232.26	1222.78	1507.35	1625.47	1545.8	1547.06	1503.77	Up Regulated
ENSG00000254759	ENSG00000254759.1	NAP1L1P1	126067539	126068601	1	Protein_Coding	nucleosome assembly protein 1 like 1 pseudogene 1 [Source:HGNC Symbol;Acc:HGNC:38004]	1362.38	0.246032	0.0949721	0.0012954	0.0220002	2056	1279	1378	1673	1649	1668	1875	1659	1133.91	1347.06	1415.96	1659.08	1704	1720.07	1661.36	1712.26	Up Regulated
ENSG00000131401	ENSG00000131401.11	NAPSB	50333796	50344773	-1	Protein_Coding	napsin B aspartic peptidase, pseudogene [Source:HGNC Symbol;Acc:HGNC:13396]	465.058	-0.510393	0.236917	0.0013122	0.0222106	1134	723	766	489	415	376	465	438	625.414	761.473	787.098	484.932	428.843	387.738	412.018	452.061	Down Regulated
ENSG00000110660	ENSG00000110660.15	SLC35F2	107790991	107928293	-1	Protein_Coding	solute carrier family 35 member F2 [Source:HGNC Symbol;Acc:HGNC:23615]	876.787	-0.222278	0.0835756	0.00131346	0.0222106	2673	1328	1245	1006	1080	1049	1228	988	1474.19	1398.67	1279.29	997.63	1116.03	1081.75	1088.08	1019.72	Down Regulated
ENSG00000136169	ENSG00000136169.16	SETDB2	49444274	49495003	1	Protein_Coding	SET domain bifurcated histone lysine methyltransferase 2 [Source:HGNC Symbol;Acc:HGNC:20263]	3073.35	0.194516	0.0708153	0.00131401	0.0222106	5385	3089	3172	4165	4021	3794	4401	3802	2969.89	3253.37	3259.37	4130.35	4155.13	3912.44	3899.55	3924.05	Up Regulated
ENSG00000143353	ENSG00000143353.12	LYPLAL1	219173869	219212865	1	Protein_Coding	lysophospholipase like 1 [Source:HGNC Symbol;Acc:HGNC:20440]	1699.41	0.243709	0.094177	0.00133393	0.0224854	3374	1929	1781	2484	2551	2363	2856	2329	1860.8	2031.65	1830.06	2463.33	2636.09	2436.77	2530.59	2403.76	Up Regulated
ENSG00000113327	ENSG00000113327.16	GABRG2	162000057	162162977	1	Protein_Coding	gamma-aminobutyric acid type A receptor subunit gamma2 [Source:HGNC Symbol;Acc:HGNC:4087]	182.468	0.335384	0.141797	0.00135122	0.0227201	409	241	258	330	350	329	406	354	225.568	253.824	265.106	327.254	361.675	339.271	359.74	365.364	Up Regulated
ENSG00000147650	ENSG00000147650.11	LRP12	104489231	104589258	-1	Protein_Coding	LDL receptor related protein 12 [Source:HGNC Symbol;Acc:HGNC:31708]	1862.24	0.320564	0.134389	0.00138799	0.023204	2157	983	996	1462	1508	1564	1745	1428	1189.61	1035.31	1023.43	1449.84	1558.3	1612.83	1546.17	1473.84	Up Regulated
ENSG00000183814	ENSG00000183814.15	LIN9	226231149	226309869	-1	Protein_Coding	lin-9 DREAM MuvB core complex component [Source:HGNC Symbol;Acc:HGNC:30830]	493.245	-0.279848	0.112988	0.00139297	0.0232489	1117	584	625	487	464	392	541	483	616.038	615.076	642.215	482.948	479.477	404.238	479.359	498.505	Down Regulated
ENSG00000183762	ENSG00000183762.12	KREMEN1	29073035	29168333	1	Protein_Coding	kringle containing transmembrane protein 1 [Source:HGNC Symbol;Acc:HGNC:17550]	614.494	0.359915	0.156256	0.00140964	0.0234887	701	436	370	677	597	650	713	653	386.609	459.201	380.191	671.367	616.914	670.292	631.761	673.962	Up Regulated
ENSG00000181472	ENSG00000181472.5	ZBTB2	151364115	151391559	-1	Protein_Coding	zinc finger and BTB domain containing 2 [Source:HGNC Symbol;Acc:HGNC:20868]	806.276	-0.189955	0.0694097	0.00142523	0.0235935	1536	815	768	749	692	652	790	677	847.121	858.369	789.154	742.768	715.083	672.354	699.987	698.733	Down Regulated
ENSG00000095383	ENSG00000095383.20	TBC1D2	98199011	98255649	-1	Protein_Coding	TBC1 domain family member 2 [Source:HGNC Symbol;Acc:HGNC:18026]	710.515	0.378164	0.166872	0.00143566	0.0236697	1073	663	714	1142	994	1026	1314	1109	591.772	698.28	733.666	1132.5	1027.16	1058.03	1164.28	1144.6	Up Regulated
ENSG00000173852	ENSG00000173852.14	DPY19L1	34927292	35038271	-1	Protein_Coding	dpy-19 like C-mannosyltransferase 1 [Source:HGNC Symbol;Acc:HGNC:22205]	652.744	-0.250582	0.098773	0.00145566	0.0239025	1532	777	840	653	633	636	706	624	844.915	818.346	863.137	647.567	654.115	655.855	625.558	644.031	Down Regulated
ENSG00000198842	ENSG00000198842.9	STYXL2	167094075	167129165	1	Protein_Coding	serine/threonine/tyrosine interacting like 2 [Source:HGNC Symbol;Acc:HGNC:25034]	104.753	-0.502337	0.237582	0.00146435	0.0240064	342	170	181	100	100	108	98	111	188.617	179.046	185.985	99.168	103.336	111.372	86.8339	114.563	Down Regulated
ENSG00000136286	ENSG00000136286.16	MYO1G	44962662	44979088	-1	Protein_Coding	myosin IG [Source:HGNC Symbol;Acc:HGNC:13880]	147.829	0.595164	0.29289	0.00147797	0.0241711	165	94	97	184	234	182	215	187	90.9993	99.002	99.6717	182.469	241.805	187.682	190.503	193.003	Up Regulated
ENSG00000114120	ENSG00000114120.12	SLC25A36	140941830	140980995	1	Protein_Coding	solute carrier family 25 member 36 [Source:HGNC Symbol;Acc:HGNC:25554]	2174.9	0.226133	0.087003	0.00149326	0.0243602	4180	2180	2088	2845	2952	2632	3309	2735	2305.32	2296	2145.51	2821.33	3050.47	2714.17	2931.97	2822.8	Up Regulated
ENSG00000182534	ENSG00000182534.13	MXRA7	76672551	76711004	-1	Protein_Coding	matrix remodeling associated 7 [Source:HGNC Symbol;Acc:HGNC:7541]	388.988	0.224003	0.0880513	0.00152686	0.0248108	653	397	370	473	483	463	555	470	360.137	418.126	380.191	469.065	499.111	477.454	491.763	485.088	Up Regulated
ENSG00000035681	ENSG00000035681.9	NSMAF	58583508	58659853	-1	Protein_Coding	neutral sphingomyelinase activation associated factor [Source:HGNC Symbol;Acc:HGNC:8017]	4621.53	0.176978	0.064288	0.00154709	0.0249996	7703	3527	3761	4870	4700	4538	5514	4600	4248.29	3714.68	3864.59	4829.48	4856.78	4679.67	4885.74	4747.67	Up Regulated
ENSG00000163788	ENSG00000163788.14	SNRK	43286512	43424764	1	Protein_Coding	SNF related kinase [Source:HGNC Symbol;Acc:HGNC:30598]	1391.14	0.198605	0.07428	0.0015551	0.0250874	2144	1195	1211	1526	1478	1470	1746	1456	1182.44	1258.59	1244.36	1513.3	1527.3	1515.89	1547.06	1502.74	Up Regulated
ENSG00000198805	ENSG00000198805.11	PNP	20468954	20477089	1	Protein_Coding	purine nucleoside phosphorylase [Source:HGNC Symbol;Acc:HGNC:7892]	3180.39	-0.263522	0.106608	0.00156554	0.0251975	6232	3912	3424	2642	2619	2721	3243	2504	3437.02	4120.17	3518.31	2620.02	2706.36	2805.94	2873.49	2584.38	Down Regulated
ENSG00000144115	ENSG00000144115.16	THNSL2	88170295	88186636	1	Protein_Coding	threonine synthase like 2 [Source:HGNC Symbol;Acc:HGNC:25602]	100.616	0.420158	0.194128	0.00158425	0.0254133	146	74	70	115	135	108	150	113	80.5206	77.9378	71.9281	114.043	139.503	111.372	132.909	116.627	Up Regulated
ENSG00000079462	ENSG00000079462.7	PAFAH1B3	42297033	42303546	-1	Protein_Coding	platelet activating factor acetylhydrolase 1b catalytic subunit 3 [Source:HGNC Symbol;Acc:HGNC:8576]	134.348	-0.482744	0.230731	0.00159054	0.0254587	252	153	143	119	79	92	107	90	138.981	161.142	146.939	118.01	81.6352	94.8721	94.8084	92.8891	Down Regulated
ENSG00000115165	ENSG00000115165.10	CYTIP	157414619	157488961	-1	Protein_Coding	cytohesin 1 interacting protein [Source:HGNC Symbol;Acc:HGNC:9506]	1737.89	0.239941	0.0947648	0.00159576	0.0255006	3651	1932	1933	2502	2530	2603	2816	2519	2013.57	2034.81	1986.24	2481.18	2614.39	2684.26	2495.15	2599.86	Up Regulated
ENSG00000144476	ENSG00000144476.6	ACKR3	236567787	236582354	1	Protein_Coding	atypical chemokine receptor 3 [Source:HGNC Symbol;Acc:HGNC:23692]	347.696	0.582833	0.293843	0.00165636	0.0261618	467	271	207	481	493	612	546	473	257.556	285.421	212.702	476.998	509.445	631.106	483.789	488.184	Up Regulated
ENSG00000013583	ENSG00000013583.10	HEBP1	12974870	13000265	-1	Protein_Coding	heme binding protein 1 [Source:HGNC Symbol;Acc:HGNC:17176]	212.115	0.303283	0.135875	0.00165956	0.0261919	210	112	112	174	165	162	190	170	115.817	117.96	115.085	172.552	170.504	167.057	168.351	175.457	Up Regulated
ENSG00000058091	ENSG00000058091.17	CDK14	90466424	91210590	1	Protein_Coding	cyclin dependent kinase 14 [Source:HGNC Symbol;Acc:HGNC:8883]	673.358	-0.262092	0.102585	0.00170055	0.026735	1186	673	704	538	469	492	633	546	654.092	708.812	723.391	533.524	484.644	507.359	560.876	563.527	Down Regulated
ENSG00000156958	ENSG00000156958.15	GALK2	49155656	49367869	1	Protein_Coding	galactokinase 2 [Source:HGNC Symbol;Acc:HGNC:4119]	744.64	-0.172016	0.0628233	0.00171061	0.0268629	1363	702	697	642	650	588	673	597	751.71	739.355	716.198	636.659	671.682	606.356	596.318	616.165	Down Regulated
ENSG00000104356	ENSG00000104356.11	POP1	98117293	98159835	1	Protein_Coding	POP1 homolog, ribonuclease P/MRP subunit [Source:HGNC Symbol;Acc:HGNC:30129]	1312.81	-0.172635	0.0631658	0.00171947	0.0269697	2811	1456	1421	1347	1269	1213	1406	1287	1550.3	1533.48	1460.14	1335.79	1311.33	1250.87	1245.8	1328.31	Down Regulated
ENSG00000144481	ENSG00000144481.17	TRPM8	233917373	234019522	1	Protein_Coding	transient receptor potential cation channel subfamily M member 8 [Source:HGNC Symbol;Acc:HGNC:17961]	2585.26	0.377754	0.174003	0.00178129	0.0276143	3073	2509	2201	3665	3541	3400	4068	3446	1694.79	2642.51	2261.62	3634.51	3659.12	3506.14	3604.49	3556.62	Up Regulated
ENSG00000151287	ENSG00000151287.17	TEX30	102765888	102773811	-1	Protein_Coding	testis expressed 30 [Source:HGNC Symbol;Acc:HGNC:25188]	298.424	-0.394787	0.183765	0.00178295	0.0276143	672	283	335	225	236	188	255	200	370.616	298.059	344.227	223.128	243.872	193.869	225.945	206.42	Down Regulated
ENSG00000156171	ENSG00000156171.14	DRAM2	111117163	111140203	-1	Protein_Coding	DNA damage regulated autophagy modulator 2 [Source:HGNC Symbol;Acc:HGNC:28769]	1977.69	0.204738	0.0789554	0.00183738	0.0282092	4119	2430	2438	3050	2994	2892	3453	3001	2271.67	2559.31	2505.15	3024.62	3093.87	2982.28	3059.57	3097.34	Up Regulated
ENSG00000182853	ENSG00000182853.12	VMO1	4785285	4786433	-1	Protein_Coding	vitelline membrane outer layer 1 homolog [Source:HGNC Symbol;Acc:HGNC:30387]	14.9527	0.854911	0.471894	0.00184744	0.0282995	28	13	11	35	40	47	41	42	15.4423	13.6918	11.303	34.7088	41.3343	48.4673	36.3285	43.3483	Up Regulated
ENSG00000011143	ENSG00000011143.16	MKS1	58205441	58219605	-1	Protein_Coding	MKS transition zone complex subunit 1 [Source:HGNC Symbol;Acc:HGNC:7121]	172.561	-0.274326	0.115164	0.00185168	0.0283432	431	215	234	156	167	192	189	141	237.701	226.441	240.445	154.702	172.571	197.994	167.465	145.526	Down Regulated
ENSG00000110042	ENSG00000110042.8	DTX4	59171430	59208588	1	Protein_Coding	deltex E3 ubiquitin ligase 4 [Source:HGNC Symbol;Acc:HGNC:29151]	348.75	0.424696	0.204367	0.00186604	0.0284886	465	224	263	365	367	382	518	407	256.453	235.92	270.244	361.963	379.242	393.925	458.979	420.065	Up Regulated
ENSG00000161921	ENSG00000161921.15	CXCL16	4733533	4739928	-1	Protein_Coding	C-X-C motif chemokine ligand 16 [Source:HGNC Symbol;Acc:HGNC:16642]	212.462	0.359573	0.17725	0.00188225	0.0285956	204	142	136	243	223	217	249	212	112.508	149.556	139.746	240.978	230.439	223.774	220.629	218.806	Up Regulated
ENSG00000159055	ENSG00000159055.4	MIS18A	32268228	32279049	-1	Protein_Coding	MIS18 kinetochore protein A [Source:HGNC Symbol;Acc:HGNC:1286]	166.413	-0.350963	0.160056	0.0019021	0.0288561	394	221	240	138	150	135	181	151	217.295	232.76	246.61	136.852	155.003	139.214	160.377	155.847	Down Regulated
ENSG00000124151	ENSG00000124151.19	NCOA3	47501887	47656877	1	Protein_Coding	nuclear receptor coactivator 3 [Source:HGNC Symbol;Acc:HGNC:7670]	3989.9	0.222519	0.0884485	0.00192266	0.0291222	5159	3258	3167	4033	4077	3872	4452	3980	2845.25	3431.37	3254.23	3999.45	4212.99	3992.88	3944.74	4107.76	Up Regulated
ENSG00000170627	ENSG00000170627.11	GTSF1	54455950	54473602	-1	Protein_Coding	gametocyte specific factor 1 [Source:HGNC Symbol;Acc:HGNC:26565]	765.503	-0.19594	0.0750964	0.00192942	0.0291222	1475	797	748	662	641	636	799	583	813.479	839.411	768.603	656.492	662.382	655.855	707.962	601.715	Down Regulated
ENSG00000114904	ENSG00000114904.13	NEK4	52708444	52770946	-1	Protein_Coding	NIMA related kinase 4 [Source:HGNC Symbol;Acc:HGNC:11399]	1092.22	0.16492	0.0606498	0.00193125	0.0291222	1996	1103	1129	1414	1394	1293	1534	1309	1100.82	1161.69	1160.1	1402.24	1440.5	1333.37	1359.22	1351.02	Up Regulated
ENSG00000119638	ENSG00000119638.13	NEK9	75079353	75127344	-1	Protein_Coding	NIMA related kinase 9 [Source:HGNC Symbol;Acc:HGNC:18591]	2290.4	0.175116	0.0655376	0.00199267	0.0298049	4280	2032	2239	2770	2715	2522	3212	2642	2360.47	2140.13	2300.67	2746.95	2805.56	2600.73	2846.03	2726.81	Up Regulated
ENSG00000119333	ENSG00000119333.11	DYNC2I2	128633653	128656847	-1	Protein_Coding	dynein 2 intermediate chain 2 [Source:HGNC Symbol;Acc:HGNC:28296]	569.77	-0.550205	0.288239	0.00199648	0.02984	1178	544	704	373	305	317	435	344	649.68	572.948	723.391	369.897	315.174	326.896	385.436	355.043	Down Regulated
ENSG00000164684	ENSG00000164684.13	ZNF704	80628451	80874781	-1	Protein_Coding	zinc finger protein 704 [Source:HGNC Symbol;Acc:HGNC:32291]	952	0.308586	0.136923	0.00200932	0.0299877	1563	889	946	1221	1259	1228	1521	1256	862.012	936.306	972.056	1210.84	1301	1266.34	1347.7	1296.32	Up Regulated
ENSG00000076864	ENSG00000076864.19	RAP1GAP	21596221	21669357	-1	Protein_Coding	RAP1 GTPase activating protein [Source:HGNC Symbol;Acc:HGNC:9858]	24.287	0.725355	0.403131	0.00201789	0.0300715	13	12	12	21	27	19	28	29	7.16965	12.6386	12.3305	20.8253	27.9006	19.5931	24.8097	29.9309	Up Regulated
ENSG00000085382	ENSG00000085382.12	HACE1	104728094	104859919	-1	Protein_Coding	HECT domain and ankyrin repeat containing E3 ubiquitin protein ligase 1 [Source:HGNC Symbol;Acc:HGNC:21033]	645.525	-0.242552	0.0997701	0.00204055	0.0303147	1136	542	616	526	455	449	557	478	626.517	570.841	632.967	521.624	470.177	463.017	493.535	493.345	Down Regulated
ENSG00000118473	ENSG00000118473.22	SGIP1	66533267	66751139	1	Protein_Coding	SH3GL interacting endocytic adaptor 1 [Source:HGNC Symbol;Acc:HGNC:25412]	721.118	0.30253	0.133753	0.00204168	0.0303147	1386	774	693	1150	1141	1048	1239	1075	764.395	815.187	712.088	1140.43	1179.06	1080.72	1097.83	1109.51	Up Regulated
ENSG00000142875	ENSG00000142875.19	PRKACB	84078062	84238498	1	Protein_Coding	protein kinase cAMP-activated catalytic subunit beta [Source:HGNC Symbol;Acc:HGNC:9381]	1743.41	-0.237262	0.0970601	0.00205143	0.0304151	4365	2026	2154	1759	1668	1628	2013	1729	2407.35	2133.81	2213.33	1744.37	1723.64	1678.82	1783.64	1784.5	Down Regulated
ENSG00000109943	ENSG00000109943.9	CRTAM	122838500	122872643	1	Protein_Coding	cytotoxic and regulatory T cell molecule [Source:HGNC Symbol;Acc:HGNC:24313]	49.2811	0.524304	0.275422	0.00205991	0.0305186	76	77	62	130	116	125	150	124	41.9149	81.0974	63.7077	128.918	119.869	128.902	132.909	127.981	Up Regulated
ENSG00000131370	ENSG00000131370.16	SH3BP5	15254353	15341368	-1	Protein_Coding	SH3 domain binding protein 5 [Source:HGNC Symbol;Acc:HGNC:10827]	86.892	0.533313	0.280953	0.00206816	0.0306184	66	32	38	105	85	92	93	81	36.3997	33.7028	39.0467	104.126	87.8353	94.8721	82.4036	83.6002	Up Regulated
ENSG00000139220	ENSG00000139220.16	PPFIA2	81257975	81759553	-1	Protein_Coding	PTPRF interacting protein alpha 2 [Source:HGNC Symbol;Acc:HGNC:9246]	298.673	0.748691	0.426883	0.00210304	0.0309543	155	152	141	722	560	543	618	571	85.4842	160.088	144.884	715.993	578.68	559.952	547.585	589.33	Up Regulated
ENSG00000129749	ENSG00000129749.3	CHRNA10	3665587	3671384	-1	Protein_Coding	cholinergic receptor nicotinic alpha 10 subunit [Source:HGNC Symbol;Acc:HGNC:13800]	43.9491	-0.593426	0.316065	0.00213195	0.0313163	81	45	42	17	22	24	21	21	44.6724	47.3946	43.1568	16.8586	22.7338	24.7492	18.6073	21.6741	Down Regulated
ENSG00000138678	ENSG00000138678.11	GPAT3	83535914	83605875	1	Protein_Coding	glycerol-3-phosphate acyltransferase 3 [Source:HGNC Symbol;Acc:HGNC:28157]	725.309	0.295786	0.1309	0.0021399	0.0313502	1818	843	757	1321	1250	1212	1496	1245	1002.65	887.858	777.851	1310.01	1291.7	1249.84	1325.55	1284.97	Up Regulated
ENSG00000173210	ENSG00000173210.19	ABLIM3	149141483	149260542	1	Protein_Coding	actin binding LIM protein family member 3 [Source:HGNC Symbol;Acc:HGNC:29132]	458.659	0.286431	0.125729	0.00214592	0.0314035	599	403	340	569	498	536	585	529	330.355	424.445	349.365	564.266	514.612	552.733	518.345	545.982	Up Regulated
ENSG00000128578	ENSG00000128578.10	STRIP2	129434432	129488399	1	Protein_Coding	striatin interacting protein 2 [Source:HGNC Symbol;Acc:HGNC:22209]	342.468	-0.261941	0.111449	0.00214856	0.031407	577	315	360	277	251	251	295	246	318.222	331.762	369.916	274.695	259.372	258.836	261.388	253.897	Down Regulated
ENSG00000169188	ENSG00000169188.5	APEX2	55000363	55009057	1	Protein_Coding	apurinic/apyrimidinic endodeoxyribonuclease 2 [Source:HGNC Symbol;Acc:HGNC:17889]	586.059	-0.306512	0.137999	0.0022014	0.0320537	1365	597	700	553	490	516	545	490	752.813	628.768	719.281	548.399	506.345	532.109	482.903	505.73	Down Regulated
ENSG00000082269	ENSG00000082269.16	FAM135A	70412941	70561174	1	Protein_Coding	family with sequence similarity 135 member A [Source:HGNC Symbol;Acc:HGNC:21084]	1239.68	-0.242738	0.0987516	0.00220905	0.032119	3132	1446	1450	1276	1237	1176	1358	1189	1727.33	1522.95	1489.94	1265.38	1278.26	1212.71	1203.27	1227.17	Down Regulated
ENSG00000172469	ENSG00000172469.16	MANEA	95577485	95609470	1	Protein_Coding	mannosidase endo-alpha [Source:HGNC Symbol;Acc:HGNC:21072]	1159.68	-0.269994	0.11675	0.00222392	0.0323121	3093	1444	1560	1238	1248	1084	1416	1106	1705.82	1520.84	1602.97	1227.7	1289.63	1117.84	1254.66	1141.5	Down Regulated
ENSG00000166974	ENSG00000166974.12	MAPRE2	34976928	35143470	1	Protein_Coding	microtubule associated protein RP/EB family member 2 [Source:HGNC Symbol;Acc:HGNC:6891]	1327	-0.184926	0.0712924	0.00223772	0.0324759	2637	1360	1527	1190	1197	1196	1319	1181	1454.34	1432.37	1569.06	1180.1	1236.93	1233.34	1168.71	1218.91	Down Regulated
ENSG00000100380	ENSG00000100380.14	ST13	40824535	40856639	-1	Protein_Coding	ST13 Hsp70 interacting protein [Source:HGNC Symbol;Acc:HGNC:11343]	2949.93	0.166059	0.0624282	0.00227284	0.0329286	5807	2959	2955	3476	3625	3431	4103	3575	3202.63	3116.46	3036.39	3447.08	3745.92	3538.11	3635.5	3689.76	Up Regulated
ENSG00000129255	ENSG00000129255.16	MPDU1	7583529	7592789	1	Protein_Coding	mannose-P-dolichol utilization defect 1 [Source:HGNC Symbol;Acc:HGNC:7207]	477.955	-0.23723	0.0986172	0.0022795	0.0330016	974	478	473	410	375	358	462	408	537.172	503.436	486.028	406.589	387.509	369.176	409.36	421.097	Down Regulated
ENSG00000178966	ENSG00000178966.16	RMI1	83980798	84004074	1	Protein_Coding	RecQ mediated genome instability 1 [Source:HGNC Symbol;Acc:HGNC:25764]	507.699	-0.325193	0.151792	0.00237808	0.0339952	983	521	463	389	365	346	428	338	542.136	548.724	475.753	385.764	377.175	356.802	379.234	348.85	Down Regulated
ENSG00000177917	ENSG00000177917.10	ARL6IP6	152717647	152762396	1	Protein_Coding	ADP ribosylation factor like GTPase 6 interacting protein 6 [Source:HGNC Symbol;Acc:HGNC:24048]	569.572	-0.26488	0.115168	0.00237826	0.0339952	1489	738	812	606	567	528	748	603	821.2	777.271	834.365	600.958	585.913	544.483	662.773	622.357	Down Regulated
ENSG00000135454	ENSG00000135454.14	B4GALNT1	57623409	57633239	-1	Protein_Coding	beta-1,4-N-acetyl-galactosaminyltransferase 1 [Source:HGNC Symbol;Acc:HGNC:4117]	113.856	0.464103	0.245233	0.00238405	0.0340302	94	51	60	127	91	115	132	116	51.8421	53.7139	61.6526	125.943	94.0354	118.59	116.96	119.724	Up Regulated
ENSG00000196141	ENSG00000196141.14	SPATS2L	200305881	200482264	1	Protein_Coding	spermatogenesis associated serine rich 2 like [Source:HGNC Symbol;Acc:HGNC:24574]	1451.43	-0.266026	0.116215	0.00241408	0.0343381	2192	1117	1206	928	872	861	996	913	1208.91	1176.44	1239.22	920.279	901.087	887.879	882.516	942.309	Down Regulated
ENSG00000028137	ENSG00000028137.19	TNFRSF1B	12166991	12209228	1	Protein_Coding	TNF receptor superfamily member 1B [Source:HGNC Symbol;Acc:HGNC:11917]	5007.46	0.408432	0.207878	0.00244261	0.0346469	4560	3642	3063	5125	4983	5475	6014	5000	2514.89	3835.8	3147.37	5082.36	5149.22	5645.92	5328.77	5160.51	Up Regulated
ENSG00000137462	ENSG00000137462.7	TLR2	153684070	153706260	1	Protein_Coding	toll like receptor 2 [Source:HGNC Symbol;Acc:HGNC:11848]	8498.01	0.256758	0.111136	0.00244921	0.034692	11233	6039	5528	7425	7922	7891	9040	7356	6195.13	6360.35	5680.26	7363.22	8186.25	8137.34	8009.98	7592.14	Up Regulated
ENSG00000277147	ENSG00000277147.6	LINC00869	149606209	149705716	1	Protein_Coding	long intergenic non-protein coding RNA 869 [Source:HGNC Symbol;Acc:HGNC:29050]	150.734	-0.278767	0.124184	0.00247896	0.0349924	283	156	168	132	104	133	136	120	156.078	164.301	172.627	130.902	107.469	137.152	120.504	123.852	Down Regulated
ENSG00000114405	ENSG00000114405.10	C3orf14	62319015	62336213	1	Protein_Coding	chromosome 3 open reading frame 14 [Source:HGNC Symbol;Acc:HGNC:25024]	176.205	-0.310493	0.143583	0.00247903	0.0349924	488	218	232	184	183	170	189	165	269.137	229.6	238.39	182.469	189.104	175.307	167.465	170.297	Down Regulated
ENSG00000137193	ENSG00000137193.14	PIM1	37170152	37175428	1	Protein_Coding	Pim-1 proto-oncogene, serine/threonine kinase [Source:HGNC Symbol;Acc:HGNC:8986]	2319.16	0.284747	0.128308	0.00249927	0.0352292	3110	1752	1809	2333	2308	2530	2776	2393	1715.2	1845.23	1858.83	2313.59	2384.99	2608.98	2459.7	2469.82	Up Regulated
ENSG00000007237	ENSG00000007237.18	GAS7	9910606	10198606	-1	Protein_Coding	growth arrest specific 7 [Source:HGNC Symbol;Acc:HGNC:4169]	4307.01	0.265586	0.11684	0.00250982	0.0352531	5611	2774	2935	3860	3826	3881	4611	4018	3094.53	2921.61	3015.84	3827.88	3953.62	4002.16	4085.62	4146.98	Up Regulated
ENSG00000197046	ENSG00000197046.11	SIGLEC15	45825675	45844094	1	Protein_Coding	sialic acid binding Ig like lectin 15 [Source:HGNC Symbol;Acc:HGNC:27596]	254.149	0.404598	0.206673	0.00251312	0.0352531	333	187	149	238	263	272	334	263	183.653	196.951	153.104	236.02	271.773	280.491	295.944	271.443	Up Regulated
ENSG00000105993	ENSG00000105993.15	DNAJB6	157335381	157417439	1	Protein_Coding	DnaJ heat shock protein family (Hsp40) member B6 [Source:HGNC Symbol;Acc:HGNC:14888]	2406.85	0.211838	0.0866621	0.00255102	0.0357107	3040	1655	1674	1976	1983	2119	2387	2050	1676.59	1743.07	1720.11	1959.56	2049.15	2185.15	2115.03	2115.81	Up Regulated
ENSG00000164542	ENSG00000164542.12	KIAA0895	36324152	36390125	-1	Protein_Coding	KIAA0895 [Source:HGNC Symbol;Acc:HGNC:22206]	92.0879	-0.479032	0.259061	0.00255576	0.0357525	171	106	117	55	53	48	75	68	94.3084	111.641	120.223	54.5424	54.7679	49.4985	66.4545	70.1829	Down Regulated
ENSG00000156711	ENSG00000156711.17	MAPK13	36127809	36144524	1	Protein_Coding	mitogen-activated protein kinase 13 [Source:HGNC Symbol;Acc:HGNC:6875]	353.318	0.301601	0.140005	0.00259492	0.0361261	427	247	221	396	363	383	367	348	235.495	260.144	227.087	392.705	375.108	394.957	325.184	359.171	Up Regulated
ENSG00000126243	ENSG00000126243.8	LRFN3	35935358	35946624	1	Protein_Coding	leucine rich repeat and fibronectin type III domain containing 3 [Source:HGNC Symbol;Acc:HGNC:28370]	136.783	0.401946	0.206574	0.00261595	0.0363177	159	62	80	103	118	119	137	122	87.6903	65.2992	82.2035	102.143	121.936	122.715	121.39	125.916	Up Regulated
ENSG00000141506	ENSG00000141506.13	PIK3R5	8878911	8965712	-1	Protein_Coding	phosphoinositide-3-kinase regulatory subunit 5 [Source:HGNC Symbol;Acc:HGNC:30035]	914.559	0.293557	0.13505	0.00261629	0.0363177	1087	680	548	907	836	914	1036	846	599.493	716.185	563.094	899.454	863.886	942.534	917.958	873.158	Up Regulated
ENSG00000105127	ENSG00000105127.9	AKAP8	15353385	15379815	-1	Protein_Coding	A-kinase anchoring protein 8 [Source:HGNC Symbol;Acc:HGNC:378]	1561.2	0.179016	0.0700677	0.0026354	0.0363657	2258	1320	1310	1636	1610	1600	1795	1513	1245.31	1390.24	1346.08	1622.39	1663.7	1649.95	1590.48	1561.57	Up Regulated
ENSG00000171208	ENSG00000171208.9	NETO2	47077703	47143945	-1	Protein_Coding	neuropilin and tolloid like 2 [Source:HGNC Symbol;Acc:HGNC:14644]	1078.57	-0.240151	0.103051	0.00265788	0.0365765	2344	1162	1212	922	948	928	1011	952	1292.74	1223.83	1245.38	914.329	979.622	956.971	895.807	982.561	Down Regulated
ENSG00000100591	ENSG00000100591.8	AHSA1	77457870	77469472	1	Protein_Coding	activator of HSP90 ATPase activity 1 [Source:HGNC Symbol;Acc:HGNC:1189]	1322.62	-0.200438	0.0812939	0.00270218	0.0370606	2595	1335	1317	1166	1029	1170	1259	1115	1431.17	1406.04	1353.28	1156.3	1063.32	1206.53	1115.55	1150.79	Down Regulated
ENSG00000154229	ENSG00000154229.12	PRKCA	66302613	66810743	1	Protein_Coding	protein kinase C alpha [Source:HGNC Symbol;Acc:HGNC:9393]	2800.03	0.163141	0.0627465	0.00276927	0.037853	3983	2182	2472	2825	2740	2671	3063	2801	2196.67	2298.11	2540.09	2801.5	2831.4	2754.38	2714	2890.92	Up Regulated
ENSG00000124795	ENSG00000124795.16	DEK	18223860	18264548	-1	Protein_Coding	DEK proto-oncogene [Source:HGNC Symbol;Acc:HGNC:2768]	2491.23	-0.253043	0.111931	0.00283032	0.0383519	6131	2945	3497	2573	2561	2339	2825	2506	3381.32	3101.71	3593.32	2551.59	2646.43	2412.02	2503.12	2586.45	Down Regulated
ENSG00000235734	ENSG00000235734.4	HMGN1P36	97827248	97827545	1	Protein_Coding	high mobility group nucleosome binding domain 1 pseudogene 36 [Source:HGNC Symbol;Acc:HGNC:39380]	405.614	-0.267485	0.120643	0.00283784	0.0384276	1173	523	531	449	442	420	473	416	646.923	550.83	545.626	445.264	456.744	433.112	419.106	429.354	Down Regulated
ENSG00000162736	ENSG00000162736.17	NCSTN	160343316	160358952	1	Protein_Coding	nicastrin [Source:HGNC Symbol;Acc:HGNC:17091]	5928.29	0.171049	0.0668148	0.00284031	0.0384276	8986	5136	4929	6238	6195	5973	6870	5958	4955.88	5409.3	5064.76	6186.1	6401.64	6159.47	6087.23	6149.26	Up Regulated
ENSG00000183621	ENSG00000183621.15	ZNF438	30820207	31031937	-1	Protein_Coding	zinc finger protein 438 [Source:HGNC Symbol;Acc:HGNC:21029]	1409.56	0.193121	0.0783015	0.00288009	0.0387498	1415	783	797	985	992	997	1058	960	780.388	824.666	818.952	976.805	1025.09	1028.12	937.452	990.818	Up Regulated
ENSG00000237264	ENSG00000237264.4	FTH1P11	81521682	81522232	-1	Protein_Coding	ferritin heavy chain 1 pseudogene 11 [Source:HGNC Symbol;Acc:HGNC:3981]	584.001	0.303928	0.144903	0.00289786	0.038878	664	401	337	519	497	534	581	567	366.203	422.338	346.282	514.682	513.578	550.671	514.801	585.202	Up Regulated
ENSG00000276763	ENSG00000276763.1		108574683	108575064	1	Protein_Coding	ribosomal protein L10 (RPL10) pseudogene	16.4175	-0.839166	0.519347	0.00295058	0.0393574	32	20	15	10	9	7	8	4	17.6484	21.0643	15.4132	9.9168	9.30021	7.21853	7.08848	4.12841	Down Regulated
ENSG00000064652	ENSG00000064652.11	SNX24	122843439	123029354	1	Protein_Coding	sorting nexin 24 [Source:HGNC Symbol;Acc:HGNC:21533]	495.482	-0.247979	0.109751	0.00297283	0.0395961	1160	564	578	420	455	387	548	446	639.753	594.012	593.92	416.506	470.177	399.081	485.561	460.317	Down Regulated
ENSG00000101916	ENSG00000101916.11	TLR8	12906620	12923169	1	Protein_Coding	toll like receptor 8 [Source:HGNC Symbol;Acc:HGNC:15632]	383.284	0.386141	0.204417	0.00302628	0.0400715	1089	557	576	882	864	906	1077	1001	600.596	586.64	591.865	874.662	892.82	934.284	954.287	1033.13	Up Regulated
ENSG00000175906	ENSG00000175906.5	ARL4D	43398993	43401137	1	Protein_Coding	ADP ribosylation factor like GTPase 4D [Source:HGNC Symbol;Acc:HGNC:656]	96.6267	-0.314253	0.15285	0.00303738	0.0401548	229	125	146	87	93	89	104	89	126.296	131.652	150.021	86.2762	96.1022	91.7784	92.1503	91.857	Down Regulated
ENSG00000178913	ENSG00000178913.7	TAF7	141259884	141320784	-1	Protein_Coding	TATA-box binding protein associated factor 7 [Source:HGNC Symbol;Acc:HGNC:11541]	3060.79	0.146335	0.0556134	0.0030702	0.0404617	5832	3114	3082	3730	3702	3628	4108	3662	3216.41	3279.7	3166.89	3698.97	3825.49	3741.26	3639.93	3779.56	Up Regulated
ENSG00000168264	ENSG00000168264.10	IRF2BP2	234604269	234610178	-1	Protein_Coding	interferon regulatory factor 2 binding protein 2 [Source:HGNC Symbol;Acc:HGNC:21729]	5095.7	0.188145	0.0764646	0.00309013	0.0405732	8186	4300	4596	5270	5444	5394	6261	5261	4514.67	4528.82	4722.59	5226.15	5625.59	5562.39	5547.62	5429.89	Up Regulated
ENSG00000106153	ENSG00000106153.13	CHCHD2	56101573	56106476	-1	Protein_Coding	coiled-coil-helix-coiled-coil-helix domain containing 2 [Source:HGNC Symbol;Acc:HGNC:21645]	3051.87	-0.177483	0.0710663	0.00314224	0.0410188	7638	3879	3817	3541	3264	3293	3840	3347	4212.44	4085.41	3922.13	3511.54	3372.88	3395.8	3402.47	3454.44	Down Regulated
ENSG00000125726	ENSG00000125726.11	CD70	6583183	6604103	-1	Protein_Coding	CD70 molecule [Source:HGNC Symbol;Acc:HGNC:11937]	493.241	-0.569606	0.354385	0.00315811	0.0411203	910	355	482	225	184	215	286	230	501.875	373.891	495.276	223.128	190.138	221.712	253.413	237.383	Down Regulated
ENSG00000225131	ENSG00000225131.2	PSME2P2	48771128	48771827	1	Protein_Coding	proteasome activator subunit 2 pseudogene 2 [Source:HGNC Symbol;Acc:HGNC:30160]	730.408	-0.228104	0.0994572	0.0032207	0.0416946	1795	838	836	752	679	703	804	706	989.963	882.592	859.027	745.743	701.649	724.946	712.392	728.664	Down Regulated
ENSG00000198142	ENSG00000198142.5	SOWAHC	109614364	109618990	1	Protein_Coding	sosondowah ankyrin repeat domain family member C [Source:HGNC Symbol;Acc:HGNC:26149]	136.537	0.347195	0.179011	0.00322512	0.0417252	331	136	152	299	261	233	328	265	182.55	143.237	156.187	296.512	269.706	240.274	290.628	273.507	Up Regulated
ENSG00000128973	ENSG00000128973.13	CLN6	68206992	68257211	-1	Protein_Coding	CLN6 transmembrane ER protein [Source:HGNC Symbol;Acc:HGNC:2077]	822.158	-0.283298	0.134557	0.0032464	0.0419205	1683	761	846	665	613	610	675	652	928.193	801.495	869.302	659.467	633.448	629.043	598.091	672.93	Down Regulated
ENSG00000137074	ENSG00000137074.18	APTX	32886601	33025130	-1	Protein_Coding	aprataxin [Source:HGNC Symbol;Acc:HGNC:15984]	522.507	-0.153499	0.0594961	0.00328411	0.0421662	1113	603	572	533	519	513	563	520	613.832	635.087	587.755	528.565	536.312	529.015	498.852	536.693	Down Regulated
ENSG00000164916	ENSG00000164916.11	FOXK1	4682295	4771442	1	Protein_Coding	forkhead box K1 [Source:HGNC Symbol;Acc:HGNC:23480]	4241.77	0.260744	0.120251	0.00329057	0.0422224	5484	3239	2795	3773	3853	3880	4590	4231	3024.49	3411.36	2871.98	3741.61	3981.52	4001.13	4067.02	4366.82	Up Regulated
ENSG00000251453	ENSG00000251453.1	HAUS1P1	140581504	140582335	1	Protein_Coding	HAUS augmin like complex subunit 1 pseudogene 1 [Source:HGNC Symbol;Acc:HGNC:43760]	35.4508	-0.417314	0.229897	0.00329448	0.0422459	99	50	52	33	34	30	34	34	54.5996	52.6606	53.4323	32.7254	35.1341	30.9365	30.126	35.0915	Down Regulated
ENSG00000115758	ENSG00000115758.13	ODC1	10439968	10448327	-1	Protein_Coding	ornithine decarboxylase 1 [Source:HGNC Symbol;Acc:HGNC:8109]	3215.52	-0.179785	0.0728461	0.00331525	0.0424319	8131	3938	3806	3500	3283	3370	3899	3406	4484.34	4147.55	3910.83	3470.88	3392.51	3475.21	3454.75	3515.34	Down Regulated
ENSG00000100344	ENSG00000100344.10	PNPLA3	43923792	43964488	1	Protein_Coding	patatin like phospholipase domain containing 3 [Source:HGNC Symbol;Acc:HGNC:18590]	579.815	0.260309	0.120435	0.00335683	0.0428291	1300	591	651	967	875	914	1011	960	716.965	622.449	668.931	958.955	904.187	942.534	895.807	990.818	Up Regulated
ENSG00000048392	ENSG00000048392.11	RRM2B	102204502	102238961	-1	Protein_Coding	ribonucleotide reductase regulatory TP53 inducible subunit M2B [Source:HGNC Symbol;Acc:HGNC:17296]	1882.72	0.219608	0.095411	0.00338433	0.0430718	3682	2088	2181	2599	2661	2609	3114	2620	2030.66	2199.11	2241.07	2577.38	2749.76	2690.45	2759.19	2704.11	Up Regulated
ENSG00000095002	ENSG00000095002.14	MSH2	47403067	47663146	1	Protein_Coding	mutS homolog 2 [Source:HGNC Symbol;Acc:HGNC:7325]	1191	-0.243527	0.11019	0.00342903	0.0434772	2969	1353	1587	1188	1160	1092	1366	1181	1637.44	1425	1630.71	1178.12	1198.69	1126.09	1210.36	1218.91	Down Regulated
ENSG00000178789	ENSG00000178789.9	CD300LB	74521174	74531475	-1	Protein_Coding	CD300 molecule like family member b [Source:HGNC Symbol;Acc:HGNC:30811]	142.265	0.329265	0.168817	0.00345762	0.0437305	190	82	84	122	120	138	157	133	104.787	86.3635	86.3137	120.985	124.003	142.308	139.111	137.27	Up Regulated
ENSG00000168461	ENSG00000168461.13	RAB31	9708275	9862551	1	Protein_Coding	RAB31, member RAS oncogene family [Source:HGNC Symbol;Acc:HGNC:9771]	10062.7	0.169339	0.0679078	0.00346501	0.0437967	16390	8727	8383	10008	10316	10201	11797	10213	9039.27	9191.39	8613.9	9924.73	10660.1	10519.5	10452.9	10540.9	Up Regulated
ENSG00000179399	ENSG00000179399.15	GPC5	91398621	92873682	1	Protein_Coding	glypican 5 [Source:HGNC Symbol;Acc:HGNC:4453]	275.258	-0.320574	0.162934	0.00348056	0.0439386	478	234	253	216	157	183	207	193	263.622	246.452	259.969	214.203	162.237	188.713	183.414	199.196	Down Regulated
ENSG00000128268	ENSG00000128268.12	MGAT3	39457012	39492194	1	Protein_Coding	beta-1,4-mannosyl-glycoprotein 4-beta-N-acetylglucosaminyltransferase [Source:HGNC Symbol;Acc:HGNC:7046]	72.056	0.623602	0.424854	0.00348762	0.0439458	47	83	66	171	163	163	166	173	25.921	87.4167	67.8179	169.577	168.437	168.089	147.086	178.554	Up Regulated
ENSG00000100154	ENSG00000100154.14	TTC28	27978014	28679840	-1	Protein_Coding	tetratricopeptide repeat domain 28 [Source:HGNC Symbol;Acc:HGNC:29179]	944.831	0.227995	0.10103	0.00350218	0.0441019	718	313	379	496	451	452	578	495	395.985	329.656	389.439	491.873	466.044	466.111	512.143	510.89	Up Regulated
ENSG00000013374	ENSG00000013374.16	NUB1	151341772	151378449	1	Protein_Coding	negative regulator of ubiquitin like proteins 1 [Source:HGNC Symbol;Acc:HGNC:17623]	1036.54	0.218093	0.0957037	0.00361538	0.0451355	1660	1008	958	1186	1226	1189	1372	1230	915.509	1061.64	984.387	1176.13	1266.9	1226.12	1215.67	1269.49	Up Regulated
ENSG00000118007	ENSG00000118007.13	STAG1	136336236	136752403	-1	Protein_Coding	stromal antigen 1 [Source:HGNC Symbol;Acc:HGNC:11354]	1184.53	-0.212146	0.0921655	0.00363225	0.0452627	2068	1066	1244	1014	917	919	1126	876	1140.53	1122.72	1278.26	1005.56	947.588	947.69	997.704	904.121	Down Regulated
ENSG00000142046	ENSG00000142046.15	TMEM91	41350911	41384083	1	Protein_Coding	transmembrane protein 91 [Source:HGNC Symbol;Acc:HGNC:32393]	98.7226	0.375455	0.208886	0.00363693	0.0452933	110	69	72	150	117	115	155	123	60.6662	72.6717	73.9831	148.752	120.903	118.59	137.339	126.949	Up Regulated
ENSG00000119820	ENSG00000119820.11	YIPF4	32277904	32316594	1	Protein_Coding	Yip1 domain family member 4 [Source:HGNC Symbol;Acc:HGNC:28145]	1869.38	0.163861	0.0656361	0.00365174	0.0454499	3366	1709	1893	2090	2175	2142	2455	2058	1856.39	1799.94	1945.14	2072.61	2247.55	2208.87	2175.28	2124.07	Up Regulated
ENSG00000133657	ENSG00000133657.15	ATP13A3	194402672	194498364	-1	Protein_Coding	ATPase 13A3 [Source:HGNC Symbol;Acc:HGNC:24113]	12545.8	0.230877	0.103837	0.00368473	0.045776	18709	10235	9916	12758	13110	12709	15185	13131	10318.2	10779.6	10189.1	12651.9	13547.3	13105.8	13454.8	13552.5	Up Regulated
ENSG00000142583	ENSG00000142583.17	SLC2A5	9035106	9088478	-1	Protein_Coding	solute carrier family 2 member 5 [Source:HGNC Symbol;Acc:HGNC:11010]	3262.15	-0.267118	0.127887	0.00373763	0.0462417	5565	2991	2809	2273	2129	2140	2503	2252	3069.16	3150.16	2886.37	2254.09	2200.02	2206.81	2217.81	2324.29	Down Regulated
ENSG00000166444	ENSG00000166444.19	DENND2B	8693351	8910951	-1	Protein_Coding	DENN domain containing 2B [Source:HGNC Symbol;Acc:HGNC:11350]	231.334	-0.302077	0.152065	0.00373813	0.0462417	413	208	204	150	151	143	191	135	227.774	219.068	209.619	148.752	156.037	147.464	169.237	139.334	Down Regulated
ENSG00000106546	ENSG00000106546	AHR	17298652	17346147	1	Protein_Coding	aryl hydrocarbon receptor	8597.84	0.324325	0.200522	0.00482944	0.0369142	16023	9030	9416	11702	11770	11495	10489	10056	8992.02	8657.3	8547.81	11613	12129.2	11822.6	10066	11410.9	Up Regulated
ENSG00000109971	ENSG00000109971.14	HSPA8	123057489	123063230	-1	Protein_Coding	heat shock protein family A (Hsp70) member 8 [Source:HGNC Symbol;Acc:HGNC:5241]	37612.6	-0.193192	0.0819911	0.00382711	0.0469142	88306	46163	43361	38432	37066	36965	43239	37276	48701.7	48619.5	44555.3	38112.2	38302.4	38119	38312.4	38472.6	Down Regulated
ENSG00000152558	ENSG00000152558.15	TMEM123	102396332	102470384	-1	Protein_Coding	transmembrane protein 123 [Source:HGNC Symbol;Acc:HGNC:30138]	8497.84	0.224325	0.100522	0.00382944	0.0469142	16123	8030	8416	10702	10770	10495	12489	11056	8892.02	8457.3	8647.81	10613	11129.2	10822.6	11066	11410.9	Up Regulated
ENSG00000174607	ENSG00000174607.11	UGT8	114598770	114678225	1	Protein_Coding	UDP glycosyltransferase 8 [Source:HGNC Symbol;Acc:HGNC:12555]	256.126	-0.230507	0.104442	0.00385573	0.0471504	616	329	366	253	267	262	298	258	339.731	346.507	376.081	250.895	275.906	270.179	264.046	266.282	Down Regulated
ENSG00000226049	ENSG00000226049.3	TLK2P1	34036681	34039872	-1	Protein_Coding	tousled like kinase 2 pseudogene 1 [Source:HGNC Symbol;Acc:HGNC:18048]	1105.6	0.139304	0.052196	0.00387957	0.0473	2007	1061	1098	1318	1274	1244	1501	1200	1106.88	1117.46	1128.24	1307.03	1316.5	1282.84	1329.98	1238.52	Up Regulated
ENSG00000258501	ENSG00000258501.1	EIF3LP1	81916231	81917888	1	Protein_Coding	eukaryotic translation initiation factor 3 subunit L pseudogene 1 [Source:HGNC Symbol;Acc:HGNC:20010]	250.925	0.207734	0.0906773	0.00388328	0.0473168	478	257	239	306	313	309	375	306	263.622	270.676	245.583	303.454	323.441	318.646	332.273	315.823	Up Regulated
ENSG00000156136	ENSG00000156136.10	DCK	70992538	71030914	1	Protein_Coding	deoxycytidine kinase [Source:HGNC Symbol;Acc:HGNC:2704]	1130.73	-0.264733	0.127737	0.00393061	0.0478075	2637	1536	1590	1134	1107	1093	1300	1139	1454.34	1617.74	1633.79	1124.57	1143.93	1127.12	1151.88	1175.56	Down Regulated
ENSG00000127533	ENSG00000127533.3	F2RL3	16888999	16892606	1	Protein_Coding	F2R like thrombin or trypsin receptor 3 [Source:HGNC Symbol;Acc:HGNC:3540]	53.5707	0.487751	0.320858	0.00405971	0.0489963	77	44	53	75	84	85	105	86	42.4664	46.3414	54.4598	74.376	86.8019	87.6536	93.0363	88.7607	Up Regulated
ENSG00000177455	ENSG00000177455.13	CD19	28931965	28939342	1	Protein_Coding	CD19 molecule [Source:HGNC Symbol;Acc:HGNC:1633]	43.2154	-0.50734	0.323916	0.00407989	0.0491388	112	47	68	29	34	31	37	26	61.7693	49.501	69.873	28.7587	35.1341	31.9678	32.7842	26.8346	Down Regulated
ENSG00000188848	ENSG00000188848.16	BEND4	42110853	42152878	-1	Protein_Coding	BEN domain containing 4 [Source:HGNC Symbol;Acc:HGNC:23815]	409.523	-0.417485	0.253207	0.00414977	0.0498464	246	109	122	79	68	79	94	64	135.672	114.8	125.36	78.3427	70.2682	81.4662	83.2897	66.0545	Down Regulated

## Sheet: Common_(DKK2,lnc-DKK2)
ENSEMBL ID	ENSEMBL ID with Version	Gene name	Gene start(bp)	Gene end(bp)	Strand	Type	Description	baseMean	log2FoldChange	lfcSE	pvalue	padj	Raw Mock1	Raw Mock2	Raw Mock3	Raw Mock4	Raw NMII_A	Raw NMII_B	Raw NMII_C	Raw NMII_D	Norm Mock1	Norm Mock2	Norm Mock3	Norm Mock4	Norm NMII_A	Norm NMII_B	Norm NMII_C	Norm NMII_D	Up/Down Regulation
ENSG00000160191	ENSG00000160191.18	PDE9A	42653621	42775509	1	Protein_Coding	phosphodiesterase 9A [Source:HGNC Symbol;Acc:HGNC:8795]	28.1233	1.16712	0.268192	6.27e-07	8.16e-05	39	20	13	37	52	59	75	41	21.5089	21.0643	13.3581	36.6922	53.7345	60.8419	66.4545	42.3162	Up Regulated
ENSG00000119669	ENSG00000119669.5	IRF2BPL	77024543	77028708	-1	Protein_Coding	interferon regulatory factor 2 binding protein like [Source:HGNC Symbol;Acc:HGNC:14282]	586.95	0.528097	0.143741	1.35e-05	0.000833126	580	526	381	507	567	652	849	623	319.876	553.99	391.494	502.782	585.913	672.354	752.265	642.999	Up Regulated
ENSG00000165178	ENSG00000165178.9	NCF1C	75156639	75172044	-1	Protein_Coding	neutrophil cytosolic factor 1C pseudogene [Source:HGNC Symbol;Acc:HGNC:32523]	70.1964	0.745351	0.358682	0.00123946	0.0213355	38	17	18	24	34	38	54	37	20.9574	17.9046	18.4958	23.8003	35.1341	39.1863	47.8472	38.1878	Up Regulated
ENSG00000123405	ENSG00000123405.14	NFE2	54292111	54301015	-1	Protein_Coding	nuclear factor, erythroid 2 [Source:HGNC Symbol;Acc:HGNC:7780]	47.296	-0.515596	0.255251	0.00174422	0.0272319	153	72	87	77	56	52	47	49	84.3812	75.8313	89.3963	76.3594	57.868	53.6234	41.6448	50.573	Down Regulated

## Sheet: correlated to CYP1B1
ENSEMBL ID	Pearson's correlation coefficient (PCC)
ENSG00000112312	-0.945217
ENSG00000176225	-0.943178
ENSG00000273703	-0.932231
ENSG00000197153	-0.958943
ENSG00000125810	0.96304
ENSG00000145087	-0.901476
ENSG00000122952	-0.948627
ENSG00000146918	-0.936814
ENSG00000171241	-0.925257
ENSG00000149269	-0.975379
ENSG00000010278	0.945695
ENSG00000085840	-0.954415
ENSG00000181938	-0.963561
ENSG00000164070	-0.954916
ENSG00000135931	0.992223
ENSG00000165304	-0.938624
ENSG00000140525	-0.940792
ENSG00000106462	-0.934059
ENSG00000120334	-0.91572
ENSG00000111602	-0.923377
ENSG00000274267	-0.966829
ENSG00000276410	-0.931358
ENSG00000181019	0.982294
ENSG00000144554	-0.925914
ENSG00000197971	0.95837
ENSG00000165029	0.974814
ENSG00000143476	-0.940819
ENSG00000133119	-0.911006
ENSG00000117748	-0.931173
ENSG00000083720	-0.948185
ENSG00000130340	0.968437
ENSG00000129173	-0.935046
ENSG00000174371	-0.961457
ENSG00000131981	0.956101
ENSG00000149636	-0.946741
ENSG00000171848	-0.943206
ENSG00000149548	-0.933312
ENSG00000102384	-0.958614
ENSG00000168913	-0.927107
ENSG00000146670	-0.933361
ENSG00000137819	0.985751
ENSG00000071539	-0.967689
ENSG00000276180	-0.949441
ENSG00000176890	-0.935085
ENSG00000184445	-0.943248
ENSG00000227739	-0.964316
ENSG00000124575	-0.954648
ENSG00000198431	0.995854
ENSG00000172578	0.957117
ENSG00000104738	-0.950338
ENSG00000085999	-0.904709
ENSG00000138796	-0.962031
ENSG00000106823	-0.910621
ENSG00000214018	-0.940664
ENSG00000198700	-0.964877
ENSG00000112118	-0.920669
ENSG00000146263	-0.90583
ENSG00000275714	-0.966227
ENSG00000159147	-0.94946
ENSG00000114541	0.901108
ENSG00000012048	-0.934706
ENSG00000111879	-0.970627
ENSG00000125885	-0.929666
ENSG00000275713	-0.955515
ENSG00000117632	-0.93154
ENSG00000144354	-0.904328
ENSG00000101868	-0.959934
ENSG00000187741	-0.925216
ENSG00000134779	-0.932751
ENSG00000134830	0.941596
ENSG00000097046	-0.93242
ENSG00000110090	0.959791
ENSG00000134291	-0.929126
ENSG00000159259	-0.93415
ENSG00000185950	0.959667
ENSG00000111445	-0.942243
ENSG00000188312	-0.906117
ENSG00000136492	-0.92743
ENSG00000136824	-0.946278
ENSG00000140199	0.920991
ENSG00000124098	0.974165
ENSG00000171320	-0.914864
ENSG00000132646	-0.93676
ENSG00000109685	-0.909842
ENSG00000197061	-0.928484
ENSG00000156535	0.977775
ENSG00000152495	-0.981555
ENSG00000054793	0.943647
ENSG00000101773	-0.956106
ENSG00000249992	0.901961
ENSG00000273983	-0.966715
ENSG00000116830	-0.925961
ENSG00000180113	0.980437
ENSG00000000460	-0.943795
ENSG00000186638	-0.912688
ENSG00000111554	-0.97688
ENSG00000158373	-0.95643
ENSG00000106399	-0.937153
ENSG00000094804	-0.929844
ENSG00000176208	-0.929352
ENSG00000065328	-0.904276
ENSG00000090863	0.948326
ENSG00000273802	-0.940203
ENSG00000074266	-0.916871
ENSG00000163508	-0.950994
ENSG00000119714	0.961245
ENSG00000189362	-0.926041
ENSG00000008083	0.903653
ENSG00000131389	0.979085
ENSG00000035862	0.932858
ENSG00000189057	-0.93357
ENSG00000142856	-0.924464
ENSG00000093009	-0.930439
ENSG00000272899	0.959562
ENSG00000166845	-0.940966
ENSG00000168883	-0.957281
ENSG00000101407	-0.949899
ENSG00000167325	-0.949081
ENSG00000274641	-0.906663
ENSG00000127589	-0.950919
ENSG00000132002	-0.95736
ENSG00000156970	-0.910936
ENSG00000092470	-0.920368
ENSG00000139112	0.971474
ENSG00000077152	-0.965356
ENSG00000186480	0.928899
ENSG00000153823	0.90931
ENSG00000107798	0.950433
ENSG00000112029	-0.928065
ENSG00000116237	-0.97819
ENSG00000168496	-0.957943
ENSG00000110583	-0.907522
ENSG00000164463	0.920286
ENSG00000148019	-0.945886
ENSG00000142230	-0.961444
ENSG00000197702	0.966037
ENSG00000159212	0.947126
ENSG00000161888	-0.911735
ENSG00000156398	-0.941787
ENSG00000174080	0.940416
ENSG00000149554	-0.927075
ENSG00000131470	-0.921552
ENSG00000286169	0.986235
ENSG00000160213	0.932224
ENSG00000116729	-0.973276
ENSG00000164045	-0.950275
ENSG00000107863	-0.984362
ENSG00000278463	-0.960339
ENSG00000126775	0.950184
ENSG00000123219	-0.906976
ENSG00000124635	-0.917014
ENSG00000100629	-0.958881
ENSG00000276043	-0.95977
ENSG00000278637	-0.946531
ENSG00000117139	0.969899
ENSG00000095951	0.985517
ENSG00000123374	-0.987882
ENSG00000174442	-0.935038
ENSG00000182944	0.925657
ENSG00000146070	0.975058
ENSG00000115414	-0.984931
ENSG00000129484	-0.956201
ENSG00000184357	-0.953768
ENSG00000145604	-0.96701
ENSG00000278705	-0.938872
ENSG00000205856	0.941253
ENSG00000151012	0.996659
ENSG00000101361	-0.925016
ENSG00000154920	-0.9505
ENSG00000172292	-0.977312
ENSG00000203814	-0.933024
ENSG00000136982	-0.931555
ENSG00000165244	-0.90397
ENSG00000277075	-0.904109
ENSG00000132383	-0.915618
ENSG00000096433	-0.975501
ENSG00000071242	0.974576
ENSG00000170734	-0.912806
ENSG00000158169	-0.926433
ENSG00000127083	-0.903164
ENSG00000153071	0.900118
ENSG00000100441	0.937025
ENSG00000151503	-0.930156
ENSG00000276368	-0.949426
ENSG00000140455	0.919604
ENSG00000226564	0.981094
ENSG00000123095	0.942736
ENSG00000047365	-0.960128
ENSG00000066427	0.945261
ENSG00000131873	0.988071
ENSG00000185697	-0.946107
ENSG00000133302	-0.902818
ENSG00000077514	-0.915799
ENSG00000150907	0.979992
ENSG00000143319	-0.941216
ENSG00000275379	-0.974368
ENSG00000188042	0.953658
ENSG00000101670	-0.949871
ENSG00000123427	0.932661
ENSG00000156802	-0.910978
ENSG00000163918	-0.955791
ENSG00000109854	0.935046
ENSG00000165480	-0.929923
ENSG00000115687	-0.955307
ENSG00000198901	-0.914413
ENSG00000123096	0.967157
ENSG00000091651	-0.908649
ENSG00000170312	-0.920962
ENSG00000085733	0.958828
ENSG00000167670	-0.915855
ENSG00000166037	-0.957838
ENSG00000183850	-0.942051
ENSG00000136273	0.91605
ENSG00000124942	0.936155
ENSG00000073464	0.96222
ENSG00000256029	0.902977
ENSG00000137563	-0.904455
ENSG00000172167	-0.934244
ENSG00000107957	0.911301
ENSG00000183337	0.919099
ENSG00000213967	-0.979749
ENSG00000136231	-0.917926
ENSG00000119801	0.946258
ENSG00000113569	-0.939526
ENSG00000089916	0.95589
ENSG00000093000	-0.93015
ENSG00000078269	0.954012
ENSG00000151725	-0.945105
ENSG00000282226	0.935817
ENSG00000147475	0.931235
ENSG00000054118	0.948774
ENSG00000138439	0.925306
ENSG00000178726	0.956238
ENSG00000197299	-0.948408
ENSG00000114739	0.979518
ENSG00000176834	-0.910546
ENSG00000232187	0.907043
ENSG00000203760	-0.935027
ENSG00000137145	0.909375
ENSG00000076242	-0.937484
ENSG00000155465	-0.936232
ENSG00000137767	0.968871
ENSG00000173209	0.950919
ENSG00000196787	-0.944712
ENSG00000179796	0.949348
ENSG00000180596	-0.94212
ENSG00000268758	0.926469
ENSG00000128408	-0.926031
ENSG00000278828	-0.941515
ENSG00000255112	0.956043
ENSG00000163406	-0.951737
ENSG00000206053	-0.979843
ENSG00000101003	-0.910805
ENSG00000134853	0.910428
ENSG00000184678	-0.921404
ENSG00000116668	0.904815
ENSG00000178202	-0.949308
ENSG00000274997	-0.948796
ENSG00000143622	0.980892
ENSG00000135686	0.914702
ENSG00000169116	-0.901785
ENSG00000102024	0.917878
ENSG00000112851	0.91601
ENSG00000278272	-0.949046
ENSG00000205927	0.920344
ENSG00000221829	-0.963503
ENSG00000197405	0.925879
ENSG00000142657	0.9793
ENSG00000167995	0.940933
ENSG00000114796	0.987185
ENSG00000180543	0.938812
ENSG00000158246	-0.974667
ENSG00000141655	-0.981387
ENSG00000058804	-0.915185
ENSG00000120756	-0.919383
ENSG00000188985	-0.928352
ENSG00000109881	-0.914772
ENSG00000143195	-0.906516
ENSG00000115648	0.97581
ENSG00000196747	-0.93849
ENSG00000175305	-0.928057
ENSG00000196208	0.904682
ENSG00000167900	-0.930722
ENSG00000048740	0.920787
ENSG00000138613	0.979443
ENSG00000124198	0.930599
ENSG00000110911	0.947846
ENSG00000105011	-0.965346
ENSG00000111231	-0.977183
ENSG00000075702	-0.943157
ENSG00000143751	0.930882
ENSG00000136235	0.971246
ENSG00000168393	-0.922959
ENSG00000277775	-0.954445
ENSG00000131462	-0.966517
ENSG00000255397	-0.907087
ENSG00000162607	-0.956995
ENSG00000070950	-0.927173
ENSG00000160753	-0.965541
ENSG00000184371	0.946185
ENSG00000277157	-0.910736
ENSG00000135778	0.92913
ENSG00000170425	0.942775
ENSG00000149294	0.950317
ENSG00000105173	-0.958114
ENSG00000225968	0.941527
ENSG00000088833	-0.974393
ENSG00000092621	-0.939244
ENSG00000198176	-0.956857
ENSG00000119950	0.919014
ENSG00000185127	0.910868
ENSG00000233822	-0.901076
ENSG00000067842	0.933938
ENSG00000165338	-0.927707
ENSG00000274290	-0.921858
ENSG00000116983	-0.93845
ENSG00000008513	0.917066
ENSG00000170791	-0.942636
ENSG00000042088	-0.912413
ENSG00000265273	0.971989
ENSG00000104687	0.979516
ENSG00000124496	0.904892
ENSG00000221843	0.964105
ENSG00000284859	0.939806
ENSG00000175455	-0.930781
ENSG00000087842	0.944214
ENSG00000173848	-0.904086
ENSG00000152409	0.907659
ENSG00000137269	-0.950428
ENSG00000142528	-0.949394
ENSG00000108306	0.921892
ENSG00000163781	-0.917819
ENSG00000081870	-0.948427
ENSG00000144283	-0.941092
ENSG00000164002	-0.971412
ENSG00000125450	-0.915166
ENSG00000154928	0.917296
ENSG00000152954	0.969344
ENSG00000151474	0.935335
ENSG00000228716	-0.920703
ENSG00000072210	0.964863
ENSG00000138180	-0.95651
ENSG00000116701	0.973904
ENSG00000136478	0.952184
ENSG00000171246	0.986084
ENSG00000166508	-0.94407
ENSG00000101057	-0.919052
ENSG00000147852	0.921207
ENSG00000235750	-0.976421
ENSG00000278588	-0.939598
ENSG00000123130	0.909478
ENSG00000099219	0.989636
ENSG00000159592	0.911057
ENSG00000114742	0.934968
ENSG00000138798	0.911911
ENSG00000110066	0.966662
ENSG00000163536	0.98247
ENSG00000179630	0.962005
ENSG00000113240	0.97971
ENSG00000106799	0.931283
ENSG00000187837	-0.927342
ENSG00000086061	-0.965817
ENSG00000121966	0.969229
ENSG00000243335	0.918299
ENSG00000258445	-0.907556
ENSG00000185420	0.991717
ENSG00000164430	-0.980044
ENSG00000183935	0.927586
ENSG00000257199	-0.951265
ENSG00000259781	-0.949242
ENSG00000179348	0.953128
ENSG00000006634	-0.921259
ENSG00000274618	-0.934357
ENSG00000138433	0.906363
ENSG00000163814	0.932698
ENSG00000140450	0.974479
ENSG00000263606	-0.945951
ENSG00000102098	-0.907664
ENSG00000218502	-0.91202
ENSG00000138061	1
ENSG00000171940	0.933404
ENSG00000164935	0.963502
ENSG00000185640	0.959562
ENSG00000160179	0.939726
ENSG00000147614	0.962609
ENSG00000103479	0.919452
ENSG00000282608	0.967851
ENSG00000198001	-0.954642
ENSG00000153317	0.935242
ENSG00000166801	-0.903904
ENSG00000168411	-0.906497
ENSG00000158042	-0.919017
ENSG00000173083	-0.957939
ENSG00000110799	0.955333
ENSG00000219507	0.903339
ENSG00000215835	0.974071
ENSG00000147677	0.946535
ENSG00000104450	-0.9058
ENSG00000047249	0.939031
ENSG00000177426	0.912892
ENSG00000143882	0.938945
ENSG00000144711	0.990904
ENSG00000132773	-0.95778
ENSG00000125845	0.949632
ENSG00000102575	0.978698
ENSG00000185130	-0.918756
ENSG00000144645	-0.93464
ENSG00000169826	0.956254
ENSG00000196352	0.928371
ENSG00000102054	-0.942996
ENSG00000164626	-0.922325
ENSG00000177156	0.991431
ENSG00000067066	0.928947
ENSG00000115594	0.935769
ENSG00000087299	-0.941258
ENSG00000219682	-0.947881
ENSG00000177084	-0.926747
ENSG00000100368	0.964582
ENSG00000228519	-0.966339
ENSG00000101493	0.978684
ENSG00000188486	-0.96076
ENSG00000101945	-0.90908
ENSG00000128245	-0.966782
ENSG00000203730	0.937698
ENSG00000108175	0.939071
ENSG00000138829	-0.969079
ENSG00000139880	-0.936381
ENSG00000180370	0.928024
ENSG00000074410	0.959646
ENSG00000133687	0.9005
ENSG00000114126	0.96158
ENSG00000185022	0.932891
ENSG00000166548	0.949848
ENSG00000136161	0.931341
ENSG00000014138	-0.945667
ENSG00000060982	0.933456
ENSG00000162929	-0.928342
ENSG00000163950	-0.936654
ENSG00000139651	0.94337
ENSG00000186871	-0.910698
ENSG00000010803	-0.914771
ENSG00000159733	0.947044
ENSG00000049541	-0.925199
ENSG00000069956	0.946358
ENSG00000050438	0.917679
ENSG00000183598	-0.960424
ENSG00000182628	-0.907814
ENSG00000161981	-0.967558
ENSG00000165490	-0.926875
ENSG00000139289	0.964898
ENSG00000198830	-0.90651
ENSG00000118689	0.912038
ENSG00000119408	0.945667
ENSG00000161980	-0.931339
ENSG00000136026	0.970124
ENSG00000122378	0.918935
ENSG00000187240	-0.929802
ENSG00000152270	0.976428
ENSG00000102781	-0.904713
ENSG00000275126	-0.956942
ENSG00000171658	0.963319
ENSG00000157240	-0.938439
ENSG00000065609	0.942162
ENSG00000276903	-0.971244
ENSG00000109084	-0.922224
ENSG00000164466	-0.960212
ENSG00000119326	-0.918323
ENSG00000221955	0.926227
ENSG00000116251	0.926897
ENSG00000119640	-0.938567
ENSG00000148358	0.948558
ENSG00000147872	0.985955
ENSG00000151876	-0.926277
ENSG00000169689	-0.964771
ENSG00000051108	0.935299
ENSG00000103811	0.912908
ENSG00000168710	0.955966
ENSG00000104205	0.979046
ENSG00000120694	-0.943634
ENSG00000105486	-0.91625
ENSG00000165671	0.976661
ENSG00000066455	0.936679
ENSG00000113368	-0.944623
ENSG00000155158	0.97208
ENSG00000178951	0.907423
ENSG00000099822	0.90867
ENSG00000223723	-0.900771
ENSG00000135473	0.955267
ENSG00000244227	0.929448
ENSG00000163694	0.927655
ENSG00000001084	0.935357
ENSG00000013573	-0.929628
ENSG00000165046	-0.920493
ENSG00000270882	-0.956007
ENSG00000184743	-0.938586
ENSG00000226479	0.931412
ENSG00000116741	0.960415
ENSG00000170145	-0.987658
ENSG00000011021	0.94019
ENSG00000065154	0.94967
ENSG00000147570	0.928474
ENSG00000077713	0.953086
ENSG00000106003	0.946416
ENSG00000124588	0.934923
ENSG00000112290	-0.913225
ENSG00000198890	-0.946183
ENSG00000156110	0.964737
ENSG00000075275	0.935688
ENSG00000145354	-0.912269
ENSG00000145868	0.924204
ENSG00000149136	-0.912423
ENSG00000197977	-0.932501
ENSG00000204070	-0.932293
ENSG00000158683	0.914057
ENSG00000040275	-0.920103
ENSG00000181045	0.982895
ENSG00000123908	0.907491
ENSG00000213371	0.913899
ENSG00000138821	-0.934531
ENSG00000073150	0.93027
ENSG00000104324	0.932849
ENSG00000176014	-0.949815
ENSG00000048707	0.923852
ENSG00000101412	-0.944017
ENSG00000182831	0.912471
ENSG00000105643	0.904759
ENSG00000172661	0.90514
ENSG00000184260	-0.953927
ENSG00000108384	-0.945453
ENSG00000189308	-0.907656
ENSG00000133739	-0.952091
ENSG00000104765	0.912144
ENSG00000128918	-0.922615
ENSG00000164675	-0.909442
ENSG00000122224	0.905055
ENSG00000151553	0.924049
ENSG00000243317	0.916373
ENSG00000149679	-0.955579
ENSG00000110422	0.916349
ENSG00000170537	-0.98375
ENSG00000173905	0.923898
ENSG00000146281	-0.950208
ENSG00000168298	-0.984017
ENSG00000165501	-0.901279
ENSG00000135766	-0.983323
ENSG00000156500	-0.954894
ENSG00000072274	0.907534
ENSG00000278129	0.908688
ENSG00000187801	0.905628
ENSG00000145936	-0.924159
ENSG00000244462	0.932168
ENSG00000034713	0.921087
ENSG00000128059	-0.904441
ENSG00000135677	0.958025
ENSG00000135253	0.960051
ENSG00000134574	-0.94702
ENSG00000112110	-0.963435
ENSG00000064995	-0.906919
ENSG00000010704	0.974668
ENSG00000198056	-0.900064
ENSG00000063046	0.902549
ENSG00000157193	0.944027
ENSG00000143799	-0.978383
ENSG00000135315	-0.961346
ENSG00000275746	0.901767
ENSG00000274897	-0.935341
ENSG00000124207	-0.915623
ENSG00000023330	0.900285
ENSG00000254331	-0.959942
ENSG00000184226	-0.933084
ENSG00000257586	0.904397
ENSG00000100122	-0.985484
ENSG00000107263	0.969979
ENSG00000168300	0.922539
ENSG00000254759	0.909497
ENSG00000131401	-0.9444
ENSG00000110660	-0.9227
ENSG00000136169	0.94486
ENSG00000143353	0.95327
ENSG00000113327	0.955287
ENSG00000059588	0.90898
ENSG00000147650	0.952971
ENSG00000183814	-0.919123
ENSG00000183762	0.964574
ENSG00000148488	-0.901827
ENSG00000152952	-0.914268
ENSG00000181472	-0.906824
ENSG00000166503	-0.922021
ENSG00000069974	-0.911972
ENSG00000095383	0.963932
ENSG00000173852	-0.98979
ENSG00000198842	-0.975958
ENSG00000136286	0.94175
ENSG00000114120	0.956755
ENSG00000182534	0.936803
ENSG00000035681	0.952246
ENSG00000163788	0.97801
ENSG00000198805	-0.924175
ENSG00000075420	0.911088
ENSG00000144115	0.934371
ENSG00000079462	-0.926373
ENSG00000115165	0.966716
ENSG00000031691	-0.920419
ENSG00000254469	-0.909216
ENSG00000144476	0.914572
ENSG00000013583	0.996531
ENSG00000119403	-0.919303
ENSG00000058091	-0.927415
ENSG00000156958	-0.911541
ENSG00000104356	-0.923326
ENSG00000144481	0.92799
ENSG00000151287	-0.914518
ENSG00000221930	0.92187
ENSG00000156171	0.956029
ENSG00000182853	0.948911
ENSG00000011143	-0.931686
ENSG00000110042	0.940918
ENSG00000111696	-0.926256
ENSG00000161921	0.954012
ENSG00000159055	-0.960504
ENSG00000234465	0.913487
ENSG00000124151	0.917476
ENSG00000170627	-0.915549
ENSG00000114904	0.947533
ENSG00000119638	0.949561
ENSG00000119333	-0.952685
ENSG00000164684	0.965752
ENSG00000076864	0.902455
ENSG00000085382	-0.916096
ENSG00000118473	0.976403
ENSG00000142875	-0.933403
ENSG00000109943	0.938107
ENSG00000131370	0.955424
ENSG00000079931	-0.903454
ENSG00000139220	0.966767
ENSG00000129749	-0.979011
ENSG00000138678	0.967038
ENSG00000173210	0.929526
ENSG00000128578	-0.945125
ENSG00000169188	-0.923026
ENSG00000082269	-0.907801
ENSG00000172469	-0.927948
ENSG00000166974	-0.95776
ENSG00000198554	-0.907772
ENSG00000100380	0.946794
ENSG00000129255	-0.911084
ENSG00000178966	-0.946911
ENSG00000177917	-0.925693
ENSG00000135454	0.94722
ENSG00000196141	-0.980047
ENSG00000028137	0.922092
ENSG00000137462	0.934308
ENSG00000277147	-0.926515
ENSG00000114405	-0.930509
ENSG00000137193	0.949008
ENSG00000007237	0.987086
ENSG00000170915	-0.914357
ENSG00000197046	0.924329
ENSG00000235036	-0.90842
ENSG00000105993	0.93616
ENSG00000164542	-0.926123
ENSG00000156711	0.923365
ENSG00000126243	0.920082
ENSG00000141506	0.932322
ENSG00000172159	0.92239
ENSG00000105127	0.92381
ENSG00000171208	-0.967954
ENSG00000100591	-0.947961
ENSG00000154229	0.9009
ENSG00000196922	0.90054
ENSG00000124795	-0.93571
ENSG00000235734	-0.902441
ENSG00000162736	0.951894
ENSG00000111834	-0.928293
ENSG00000150773	-0.936521
ENSG00000183621	0.932135
ENSG00000237264	0.933102
ENSG00000214973	-0.904619
ENSG00000276763	-0.929344
ENSG00000064652	-0.910953
ENSG00000009954	-0.915132
ENSG00000101916	0.976206
ENSG00000175906	-0.958794
ENSG00000093183	-0.90241
ENSG00000178913	0.971795
ENSG00000168264	0.95185
ENSG00000214460	0.916554
ENSG00000106153	-0.954013
ENSG00000125726	-0.931219
ENSG00000225131	-0.91082
ENSG00000198142	0.960612
ENSG00000128973	-0.931848
ENSG00000181544	-0.902759
ENSG00000137074	-0.928597
ENSG00000164916	0.916985
ENSG00000251453	-0.975884
ENSG00000115758	-0.901539
ENSG00000100344	0.967961
ENSG00000116212	-0.907279
ENSG00000048392	0.953596
ENSG00000095002	-0.924042
ENSG00000139800	0.911662
ENSG00000178789	0.921511
ENSG00000168461	0.946716
ENSG00000179399	-0.908664
ENSG00000128268	0.932292
ENSG00000100154	0.935999
ENSG00000013374	0.927646
ENSG00000144401	-0.901215
ENSG00000118007	-0.909965
ENSG00000142046	0.947462
ENSG00000119820	0.909511
ENSG00000133657	0.979132
ENSG00000142583	-0.970335
ENSG00000166444	-0.953629
ENSG00000109971	-0.953244
ENSG00000152558	0.988294
ENSG00000174607	-0.968401
ENSG00000226049	0.945885
ENSG00000258501	0.948873
ENSG00000156136	-0.971093
ENSG00000285360	0.904833
ENSG00000164649	-0.937497
ENSG00000127533	0.951967
ENSG00000177455	-0.931022
ENSG00000188848	-0.954574

## Sheet: correlated to CYP1B1-AS1
ENSEMBL ID	Pearson's correlation coefficient (PCC)
ENSG00000112312	-0.942255
ENSG00000176225	-0.921803
ENSG00000273703	-0.91725
ENSG00000197153	-0.937986
ENSG00000125810	0.958998
ENSG00000122952	-0.925013
ENSG00000146918	-0.910908
ENSG00000149269	-0.960609
ENSG00000010278	0.945417
ENSG00000085840	-0.941005
ENSG00000181938	-0.953909
ENSG00000164070	-0.935434
ENSG00000135931	0.988824
ENSG00000165304	-0.914354
ENSG00000140525	-0.909761
ENSG00000106462	-0.901856
ENSG00000120334	-0.902336
ENSG00000145703	0.9039
ENSG00000274267	-0.95161
ENSG00000276410	-0.906495
ENSG00000181019	0.962123
ENSG00000144554	-0.902652
ENSG00000197971	0.942144
ENSG00000165029	0.977943
ENSG00000143476	-0.920608
ENSG00000117748	-0.934825
ENSG00000083720	-0.937966
ENSG00000130340	0.954961
ENSG00000174371	-0.93937
ENSG00000131981	0.953559
ENSG00000149636	-0.940267
ENSG00000171848	-0.915507
ENSG00000149548	-0.92277
ENSG00000102384	-0.935769
ENSG00000168913	-0.917809
ENSG00000146670	-0.909469
ENSG00000137819	0.980262
ENSG00000071539	-0.951267
ENSG00000276180	-0.945373
ENSG00000176890	-0.906013
ENSG00000184445	-0.915048
ENSG00000227739	-0.94293
ENSG00000124575	-0.93143
ENSG00000198431	0.984411
ENSG00000172578	0.968479
ENSG00000104738	-0.929886
ENSG00000138796	-0.945906
ENSG00000214018	-0.924028
ENSG00000198700	-0.939765
ENSG00000275714	-0.951201
ENSG00000159147	-0.92
ENSG00000114541	0.905778
ENSG00000012048	-0.903998
ENSG00000111879	-0.968577
ENSG00000275713	-0.934919
ENSG00000117632	-0.900247
ENSG00000101868	-0.931377
ENSG00000187741	-0.905408
ENSG00000134779	-0.904633
ENSG00000134830	0.930421
ENSG00000097046	-0.912452
ENSG00000110090	0.94667
ENSG00000134291	-0.904294
ENSG00000159259	-0.92095
ENSG00000185950	0.940151
ENSG00000111445	-0.9027
ENSG00000140416	-0.919238
ENSG00000136824	-0.909469
ENSG00000140199	0.92348
ENSG00000124098	0.953442
ENSG00000132646	-0.917203
ENSG00000197061	-0.90639
ENSG00000156535	0.972916
ENSG00000152495	-0.956352
ENSG00000054793	0.938174
ENSG00000101773	-0.939319
ENSG00000273983	-0.946673
ENSG00000116830	-0.911808
ENSG00000180113	0.976328
ENSG00000000460	-0.923022
ENSG00000111554	-0.951206
ENSG00000158373	-0.936541
ENSG00000106399	-0.935746
ENSG00000094804	-0.901839
ENSG00000176208	-0.903387
ENSG00000090863	0.972054
ENSG00000273802	-0.920459
ENSG00000074266	-0.903914
ENSG00000163508	-0.941773
ENSG00000119714	0.954204
ENSG00000189362	-0.912117
ENSG00000008083	0.917491
ENSG00000131389	0.977446
ENSG00000113645	-0.903091
ENSG00000035862	0.942272
ENSG00000189057	-0.909772
ENSG00000142856	-0.90086
ENSG00000093009	-0.912446
ENSG00000272899	0.96433
ENSG00000166845	-0.9395
ENSG00000168883	-0.96347
ENSG00000101407	-0.933115
ENSG00000167325	-0.920978
ENSG00000127589	-0.91615
ENSG00000132002	-0.95606
ENSG00000139112	0.976043
ENSG00000077152	-0.942579
ENSG00000186480	0.933544
ENSG00000153823	0.93561
ENSG00000107798	0.949194
ENSG00000116237	-0.954638
ENSG00000168496	-0.927374
ENSG00000164463	0.942633
ENSG00000148019	-0.915791
ENSG00000142230	-0.944416
ENSG00000197702	0.973756
ENSG00000159212	0.943094
ENSG00000156398	-0.915828
ENSG00000174080	0.943597
ENSG00000137809	0.93136
ENSG00000149554	-0.902075
ENSG00000131470	-0.901408
ENSG00000286169	0.982602
ENSG00000160213	0.909645
ENSG00000116729	-0.952043
ENSG00000164045	-0.929138
ENSG00000107863	-0.972049
ENSG00000278463	-0.941608
ENSG00000126775	0.922996
ENSG00000100629	-0.930314
ENSG00000276043	-0.940717
ENSG00000278637	-0.917815
ENSG00000117139	0.966027
ENSG00000095951	0.977849
ENSG00000123374	-0.967077
ENSG00000174442	-0.930392
ENSG00000182944	0.967033
ENSG00000146070	0.959916
ENSG00000115414	-0.9762
ENSG00000129484	-0.951179
ENSG00000184357	-0.930603
ENSG00000145604	-0.947604
ENSG00000278705	-0.916793
ENSG00000205856	0.973225
ENSG00000151012	0.982345
ENSG00000101361	-0.912197
ENSG00000154920	-0.91517
ENSG00000172292	-0.967233
ENSG00000203814	-0.916684
ENSG00000136982	-0.913221
ENSG00000132383	-0.909326
ENSG00000096433	-0.970688
ENSG00000071242	0.975587
ENSG00000158169	-0.919579
ENSG00000153071	0.902681
ENSG00000100441	0.942248
ENSG00000276368	-0.930018
ENSG00000140455	0.91352
ENSG00000226564	0.971956
ENSG00000123095	0.936265
ENSG00000047365	-0.95517
ENSG00000066427	0.942074
ENSG00000131873	0.983875
ENSG00000185697	-0.939048
ENSG00000150907	0.973754
ENSG00000143319	-0.922726
ENSG00000275379	-0.970067
ENSG00000188042	0.968421
ENSG00000101670	-0.949762
ENSG00000123427	0.920653
ENSG00000163918	-0.937479
ENSG00000109854	0.902351
ENSG00000115687	-0.923634
ENSG00000198901	-0.912431
ENSG00000123096	0.932743
ENSG00000085733	0.947269
ENSG00000166037	-0.943204
ENSG00000183850	-0.931122
ENSG00000136273	0.939301
ENSG00000124942	0.949958
ENSG00000073464	0.965955
ENSG00000256029	0.924144
ENSG00000172167	-0.911639
ENSG00000107957	0.93869
ENSG00000183337	0.922979
ENSG00000213967	-0.966604
ENSG00000136231	-0.912443
ENSG00000119801	0.94592
ENSG00000113569	-0.924966
ENSG00000089916	0.961663
ENSG00000093000	-0.900232
ENSG00000078269	0.935939
ENSG00000151725	-0.925365
ENSG00000282226	0.916162
ENSG00000121210	0.914691
ENSG00000147475	0.921578
ENSG00000054118	0.978225
ENSG00000138439	0.951902
ENSG00000178726	0.943738
ENSG00000197299	-0.924782
ENSG00000114739	0.970183
ENSG00000232187	0.919436
ENSG00000275993	0.910943
ENSG00000203760	-0.908863
ENSG00000137145	0.904157
ENSG00000076242	-0.945094
ENSG00000155465	-0.939052
ENSG00000137767	0.941836
ENSG00000173209	0.969361
ENSG00000196787	-0.927223
ENSG00000179796	0.956492
ENSG00000180596	-0.925213
ENSG00000268758	0.921151
ENSG00000278828	-0.921787
ENSG00000255112	0.974127
ENSG00000163406	-0.93218
ENSG00000206053	-0.965362
ENSG00000134853	0.907253
ENSG00000184678	-0.906016
ENSG00000178202	-0.922183
ENSG00000274997	-0.926633
ENSG00000143622	0.967918
ENSG00000169116	-0.920793
ENSG00000102024	0.9278
ENSG00000112851	0.912658
ENSG00000278272	-0.927529
ENSG00000205927	0.918391
ENSG00000221829	-0.940185
ENSG00000197405	0.931236
ENSG00000142657	0.972419
ENSG00000167995	0.948826
ENSG00000114796	0.986185
ENSG00000180543	0.932311
ENSG00000158246	-0.979044
ENSG00000141655	-0.955526
ENSG00000120756	-0.932991
ENSG00000109881	-0.908049
ENSG00000143195	-0.911281
ENSG00000115648	0.961324
ENSG00000196747	-0.918471
ENSG00000175305	-0.903522
ENSG00000196208	0.907308
ENSG00000167900	-0.910424
ENSG00000181982	0.922702
ENSG00000048740	0.930922
ENSG00000138613	0.965956
ENSG00000124198	0.934958
ENSG00000110911	0.956173
ENSG00000105011	-0.951291
ENSG00000111231	-0.965354
ENSG00000075702	-0.907799
ENSG00000143751	0.943714
ENSG00000136235	0.963856
ENSG00000168393	-0.905404
ENSG00000277775	-0.934731
ENSG00000131462	-0.960265
ENSG00000162607	-0.929147
ENSG00000070950	-0.912593
ENSG00000160753	-0.949579
ENSG00000184371	0.921507
ENSG00000135778	0.919492
ENSG00000170425	0.932576
ENSG00000149294	0.94426
ENSG00000105173	-0.930461
ENSG00000225968	0.944311
ENSG00000088833	-0.947921
ENSG00000092621	-0.906302
ENSG00000198176	-0.939401
ENSG00000119950	0.917723
ENSG00000185127	0.910953
ENSG00000067842	0.936101
ENSG00000008513	0.915734
ENSG00000170791	-0.958248
ENSG00000265273	0.978131
ENSG00000104687	0.962732
ENSG00000124496	0.91268
ENSG00000221843	0.95802
ENSG00000284859	0.938471
ENSG00000175455	-0.917454
ENSG00000087842	0.901563
ENSG00000152409	0.908557
ENSG00000137269	-0.946392
ENSG00000142528	-0.937102
ENSG00000108306	0.934237
ENSG00000123737	-0.90639
ENSG00000081870	-0.937465
ENSG00000144283	-0.908546
ENSG00000164002	-0.964254
ENSG00000125450	-0.907045
ENSG00000152954	0.937401
ENSG00000151474	0.952708
ENSG00000072210	0.945486
ENSG00000138180	-0.923358
ENSG00000116701	0.954371
ENSG00000136478	0.956674
ENSG00000171246	0.977852
ENSG00000166508	-0.918432
ENSG00000147852	0.915486
ENSG00000235750	-0.972572
ENSG00000278588	-0.91718
ENSG00000099219	0.986213
ENSG00000114742	0.932536
ENSG00000138798	0.933201
ENSG00000110066	0.942914
ENSG00000163536	0.970684
ENSG00000179630	0.953416
ENSG00000113240	0.968026
ENSG00000106799	0.92474
ENSG00000187837	-0.906799
ENSG00000086061	-0.962383
ENSG00000121966	0.982997
ENSG00000243335	0.912986
ENSG00000185420	0.988285
ENSG00000164430	-0.986386
ENSG00000233369	0.902113
ENSG00000257199	-0.957104
ENSG00000107581	0.92962
ENSG00000259781	-0.912636
ENSG00000179348	0.93383
ENSG00000006634	-0.9397
ENSG00000274618	-0.916065
ENSG00000138433	0.92119
ENSG00000163814	0.927432
ENSG00000140450	0.956105
ENSG00000263606	-0.932351
ENSG00000102098	-0.919687
ENSG00000138061	0.989317
ENSG00000171940	0.955903
ENSG00000164935	0.946369
ENSG00000185640	0.956376
ENSG00000160179	0.945875
ENSG00000147614	0.96027
ENSG00000103479	0.904648
ENSG00000282608	0.964012
ENSG00000198001	-0.954948
ENSG00000153317	0.942597
ENSG00000158042	-0.955644
ENSG00000173083	-0.933301
ENSG00000110799	0.959724
ENSG00000219507	0.903214
ENSG00000215835	0.986512
ENSG00000147677	0.934007
ENSG00000133195	0.914219
ENSG00000126351	0.92627
ENSG00000047249	0.904181
ENSG00000177426	0.922421
ENSG00000143882	0.920822
ENSG00000144711	0.975609
ENSG00000132773	-0.954103
ENSG00000117614	0.900798
ENSG00000125845	0.922237
ENSG00000102575	0.957272
ENSG00000144645	-0.911864
ENSG00000169826	0.954713
ENSG00000102054	-0.928904
ENSG00000164626	-0.916245
ENSG00000177156	0.974649
ENSG00000067066	0.909574
ENSG00000115594	0.963375
ENSG00000087299	-0.929303
ENSG00000107651	0.920023
ENSG00000219682	-0.924165
ENSG00000198929	0.922926
ENSG00000100368	0.976855
ENSG00000228519	-0.973984
ENSG00000101493	0.962345
ENSG00000188486	-0.962666
ENSG00000128245	-0.947748
ENSG00000203730	0.947907
ENSG00000108175	0.941258
ENSG00000138829	-0.948798
ENSG00000139880	-0.952499
ENSG00000180370	0.935837
ENSG00000074410	0.937566
ENSG00000114126	0.956063
ENSG00000185022	0.916425
ENSG00000166548	0.94699
ENSG00000136161	0.93024
ENSG00000014138	-0.917144
ENSG00000060982	0.911372
ENSG00000162929	-0.917092
ENSG00000163950	-0.923715
ENSG00000139651	0.914692
ENSG00000139190	0.902177
ENSG00000182518	-0.917907
ENSG00000159733	0.923724
ENSG00000049541	-0.901432
ENSG00000069956	0.940191
ENSG00000183598	-0.945441
ENSG00000188459	0.906015
ENSG00000161981	-0.949365
ENSG00000139289	0.952169
ENSG00000118689	0.944871
ENSG00000119408	0.93437
ENSG00000161980	-0.926924
ENSG00000136026	0.962096
ENSG00000122378	0.907506
ENSG00000187240	-0.913707
ENSG00000152270	0.970056
ENSG00000138759	-0.915431
ENSG00000275126	-0.941754
ENSG00000171658	0.952595
ENSG00000157240	-0.921488
ENSG00000276903	-0.966635
ENSG00000164466	-0.939544
ENSG00000158457	-0.917708
ENSG00000221955	0.925037
ENSG00000116251	0.916767
ENSG00000119640	-0.951079
ENSG00000148358	0.978981
ENSG00000106868	0.912208
ENSG00000147872	0.967765
ENSG00000151876	-0.939024
ENSG00000169689	-0.956361
ENSG00000168710	0.959396
ENSG00000197857	-0.91911
ENSG00000104205	0.957073
ENSG00000120694	-0.949983
ENSG00000165671	0.975936
ENSG00000066455	0.93861
ENSG00000113368	-0.916277
ENSG00000155158	0.958666
ENSG00000135473	0.936516
ENSG00000244227	0.920989
ENSG00000163694	0.928462
ENSG00000001084	0.924336
ENSG00000013573	-0.904061
ENSG00000104888	0.902008
ENSG00000165046	-0.906623
ENSG00000270882	-0.948688
ENSG00000184743	-0.913153
ENSG00000226479	0.913371
ENSG00000116741	0.954252
ENSG00000170145	-0.958867
ENSG00000011021	0.977088
ENSG00000065154	0.920401
ENSG00000147570	0.909259
ENSG00000077713	0.96862
ENSG00000198168	-0.917511
ENSG00000106003	0.929196
ENSG00000198890	-0.962871
ENSG00000156110	0.950092
ENSG00000075275	0.926181
ENSG00000145354	-0.912326
ENSG00000145868	0.913213
ENSG00000158683	0.904173
ENSG00000181045	0.970671
ENSG00000123908	0.909191
ENSG00000213371	0.923642
ENSG00000138821	-0.941711
ENSG00000073150	0.934005
ENSG00000104324	0.919342
ENSG00000176014	-0.950544
ENSG00000048707	0.928293
ENSG00000101412	-0.929683
ENSG00000156030	0.924189
ENSG00000184260	-0.948035
ENSG00000108384	-0.921721
ENSG00000133739	-0.943822
ENSG00000104765	0.913142
ENSG00000128918	-0.904559
ENSG00000164675	-0.917261
ENSG00000151553	0.931208
ENSG00000243317	0.923936
ENSG00000149679	-0.916442
ENSG00000110422	0.939894
ENSG00000170537	-0.996885
ENSG00000112941	0.904091
ENSG00000173905	0.915183
ENSG00000146281	-0.966905
ENSG00000168298	-0.972833
ENSG00000135766	-0.973057
ENSG00000156500	-0.922497
ENSG00000072274	0.908059
ENSG00000278129	0.916831
ENSG00000187801	0.9147
ENSG00000145936	-0.906903
ENSG00000244462	0.917457
ENSG00000034713	0.913895
ENSG00000135677	0.952216
ENSG00000135253	0.952734
ENSG00000134574	-0.928588
ENSG00000112110	-0.956703
ENSG00000064995	-0.90841
ENSG00000010704	0.968401
ENSG00000157193	0.942066
ENSG00000143799	-0.958135
ENSG00000135315	-0.950481
ENSG00000275746	0.915335
ENSG00000274897	-0.945103
ENSG00000124207	-0.906825
ENSG00000254331	-0.937212
ENSG00000184226	-0.928466
ENSG00000257586	0.904291
ENSG00000100122	-0.99572
ENSG00000107263	0.965208
ENSG00000168300	0.921603
ENSG00000254759	0.926205
ENSG00000131401	-0.935355
ENSG00000110660	-0.925902
ENSG00000136169	0.932509
ENSG00000143353	0.926782
ENSG00000113327	0.964513
ENSG00000147650	0.94843
ENSG00000183814	-0.917309
ENSG00000183762	0.950927
ENSG00000171467	0.901527
ENSG00000181472	-0.940735
ENSG00000095383	0.949048
ENSG00000173852	-0.966407
ENSG00000198842	-0.942825
ENSG00000136286	0.944442
ENSG00000114120	0.928785
ENSG00000182534	0.923708
ENSG00000035681	0.92998
ENSG00000163788	0.96389
ENSG00000198805	-0.935799
ENSG00000155755	-0.90419
ENSG00000144115	0.909502
ENSG00000079462	-0.948682
ENSG00000115165	0.979823
ENSG00000144476	0.92005
ENSG00000013583	0.98715
ENSG00000058091	-0.920767
ENSG00000156958	-0.90974
ENSG00000104356	-0.927049
ENSG00000144481	0.911827
ENSG00000151287	-0.911688
ENSG00000156171	0.950582
ENSG00000182853	0.968987
ENSG00000011143	-0.904747
ENSG00000110042	0.936519
ENSG00000161921	0.936415
ENSG00000159055	-0.941529
ENSG00000124151	0.919546
ENSG00000170627	-0.952452
ENSG00000114904	0.931341
ENSG00000119638	0.927746
ENSG00000119333	-0.939369
ENSG00000164684	0.965247
ENSG00000076864	0.915247
ENSG00000085382	-0.915855
ENSG00000118473	0.954167
ENSG00000142875	-0.930028
ENSG00000109943	0.920594
ENSG00000131370	0.940794
ENSG00000139220	0.946127
ENSG00000129749	-0.954135
ENSG00000138678	0.933438
ENSG00000173210	0.911222
ENSG00000128578	-0.929576
ENSG00000169188	-0.903717
ENSG00000082269	-0.911312
ENSG00000172469	-0.936769
ENSG00000166974	-0.912774
ENSG00000100380	0.948534
ENSG00000129255	-0.92209
ENSG00000178966	-0.972565
ENSG00000177917	-0.928612
ENSG00000135454	0.934394
ENSG00000166619	0.921259
ENSG00000196141	-0.959548
ENSG00000132716	0.902303
ENSG00000028137	0.914535
ENSG00000137462	0.923248
ENSG00000277147	-0.906027
ENSG00000114405	-0.923798
ENSG00000137193	0.962375
ENSG00000007237	0.990407
ENSG00000135956	0.90505
ENSG00000197046	0.909608
ENSG00000105993	0.951999
ENSG00000164542	-0.907651
ENSG00000156711	0.917981
ENSG00000126243	0.949209
ENSG00000141506	0.903692
ENSG00000105127	0.916075
ENSG00000139133	-0.924751
ENSG00000171208	-0.937817
ENSG00000100591	-0.939446
ENSG00000154229	0.928325
ENSG00000144468	0.909672
ENSG00000124795	-0.907926
ENSG00000235734	-0.901348
ENSG00000162736	0.9396
ENSG00000183621	0.951689
ENSG00000113924	0.915338
ENSG00000237264	0.937314
ENSG00000276763	-0.958737
ENSG00000064652	-0.9124
ENSG00000101916	0.984232
ENSG00000175906	-0.925239
ENSG00000178913	0.974118
ENSG00000168264	0.965359
ENSG00000102699	0.908458
ENSG00000106153	-0.963071
ENSG00000125726	-0.913839
ENSG00000091483	-0.901397
ENSG00000225131	-0.916398
ENSG00000198142	0.924189
ENSG00000128973	-0.909657
ENSG00000137074	-0.917338
ENSG00000164916	0.91755
ENSG00000251453	-0.957012
ENSG00000115758	-0.908125
ENSG00000100344	0.972554
ENSG00000048392	0.958383
ENSG00000095002	-0.904274
ENSG00000178789	0.925101
ENSG00000168461	0.947402
ENSG00000179399	-0.908278
ENSG00000128268	0.935492
ENSG00000100154	0.928733
ENSG00000013374	0.935087
ENSG00000118007	-0.906447
ENSG00000142046	0.910265
ENSG00000119820	0.933259
ENSG00000133657	0.975064
ENSG00000142583	-0.970361
ENSG00000166444	-0.971248
ENSG00000162627	-0.91683
ENSG00000109971	-0.961
ENSG00000152558	0.992837
ENSG00000174607	-0.932455
ENSG00000226049	0.912805
ENSG00000258501	0.926036
ENSG00000156136	-0.952766
ENSG00000127533	0.963981
ENSG00000177455	-0.902697
ENSG00000188848	-0.957393

## Sheet: correlated to DKK2
ENSEMBL ID	Pearson's correlation coefficient (PCC)
ENSG00000112312	0.926472
ENSG00000176225	0.907747
ENSG00000125810	-0.906265
ENSG00000145087	0.901792
ENSG00000010278	-0.943746
ENSG00000085840	0.914382
ENSG00000127423	0.9354
ENSG00000181938	0.903847
ENSG00000164070	0.9109
ENSG00000145703	-0.94999
ENSG00000197971	-0.911443
ENSG00000117748	0.941858
ENSG00000131981	-0.903572
ENSG00000118495	0.900864
ENSG00000114541	-0.947049
ENSG00000111879	0.934364
ENSG00000189212	0.934348
ENSG00000167378	-0.907628
ENSG00000144354	0.909814
ENSG00000187741	0.902369
ENSG00000134779	0.927958
ENSG00000134830	-0.912272
ENSG00000180998	0.91182
ENSG00000188312	0.903551
ENSG00000231300	0.924794
ENSG00000140199	-0.91702
ENSG00000175029	0.90256
ENSG00000249992	-0.953406
ENSG00000145545	-0.909002
ENSG00000146072	-0.935732
ENSG00000170873	-0.963194
ENSG00000106399	0.924344
ENSG00000178150	0.900088
ENSG00000090863	-0.949426
ENSG00000074266	0.912021
ENSG00000119714	-0.935572
ENSG00000008083	-0.911613
ENSG00000160191	-0.908806
ENSG00000155760	-0.924122
ENSG00000272899	-0.912021
ENSG00000132002	0.90122
ENSG00000139112	-0.908133
ENSG00000162892	-0.935144
ENSG00000186480	-0.933438
ENSG00000107798	-0.92342
ENSG00000077684	0.907907
ENSG00000110583	0.92038
ENSG00000164463	-0.927837
ENSG00000159212	-0.911943
ENSG00000174080	-0.943056
ENSG00000137809	-0.907818
ENSG00000131470	0.914761
ENSG00000286169	-0.912308
ENSG00000047056	-0.920829
ENSG00000126775	-0.90037
ENSG00000173334	-0.940046
ENSG00000101361	0.916771
ENSG00000132383	0.900852
ENSG00000096433	0.906842
ENSG00000153071	-0.921566
ENSG00000100441	-0.950384
ENSG00000123095	-0.953317
ENSG00000066427	-0.910676
ENSG00000131873	-0.90497
ENSG00000150907	-0.900085
ENSG00000188042	-0.938743
ENSG00000109854	-0.908782
ENSG00000100784	0.926285
ENSG00000085733	-0.921687
ENSG00000008441	-0.926482
ENSG00000183337	-0.926246
ENSG00000136231	0.915065
ENSG00000119801	-0.908602
ENSG00000205659	0.95214
ENSG00000282226	-0.913199
ENSG00000121210	-0.939768
ENSG00000147475	-0.915118
ENSG00000119669	-0.937965
ENSG00000054118	-0.912709
ENSG00000138439	-0.935478
ENSG00000139116	0.905213
ENSG00000232187	-0.961372
ENSG00000138760	-0.90973
ENSG00000162909	-0.925423
ENSG00000134531	-0.949317
ENSG00000112208	0.913981
ENSG00000113161	-0.93104
ENSG00000134853	-0.945167
ENSG00000104549	-0.941342
ENSG00000112851	-0.934946
ENSG00000205927	-0.935555
ENSG00000197405	-0.920382
ENSG00000120756	0.956609
ENSG00000196208	-0.940297
ENSG00000181982	-0.93595
ENSG00000110911	-0.944225
ENSG00000184371	-0.921488
ENSG00000149294	-0.912788
ENSG00000180011	-0.91619
ENSG00000225968	-0.952911
ENSG00000185127	-0.936038
ENSG00000067842	-0.958037
ENSG00000213160	0.908875
ENSG00000124496	-0.926618
ENSG00000276291	-0.926811
ENSG00000142528	0.929503
ENSG00000123737	0.920341
ENSG00000081870	0.91329
ENSG00000125450	0.924293
ENSG00000237522	0.931678
ENSG00000119599	-0.911837
ENSG00000137168	0.930129
ENSG00000151474	-0.953339
ENSG00000224584	0.911648
ENSG00000136478	-0.955686
ENSG00000084070	-0.931201
ENSG00000156968	-0.928692
ENSG00000159592	-0.9159
ENSG00000106799	-0.903824
ENSG00000243335	-0.902482
ENSG00000151694	-0.94873
ENSG00000164430	0.900497
ENSG00000179981	-0.934237
ENSG00000235376	0.918219
ENSG00000179348	-0.938634
ENSG00000140479	-0.90582
ENSG00000174748	-0.900088
ENSG00000164935	-0.91161
ENSG00000100473	0.924418
ENSG00000160179	-0.954396
ENSG00000103479	-0.932959
ENSG00000282608	-0.946447
ENSG00000153317	-0.90331
ENSG00000163430	0.965384
ENSG00000169926	-0.959768
ENSG00000147677	-0.927585
ENSG00000132773	0.90814
ENSG00000125845	-0.914301
ENSG00000141542	-0.907561
ENSG00000169826	-0.921539
ENSG00000053524	0.955636
ENSG00000135932	-0.936094
ENSG00000217801	-0.926189
ENSG00000166446	-0.911553
ENSG00000228519	0.913648
ENSG00000112972	-0.951012
ENSG00000150722	0.958335
ENSG00000180370	-0.900898
ENSG00000100504	-0.922928
ENSG00000185022	-0.900313
ENSG00000136161	-0.917653
ENSG00000145107	-0.904086
ENSG00000060982	-0.91293
ENSG00000010803	0.928006
ENSG00000156508	-0.952504
ENSG00000156504	0.949103
ENSG00000069956	-0.938474
ENSG00000050438	-0.904368
ENSG00000188459	-0.903136
ENSG00000123836	-0.927458
ENSG00000182487	-0.904252
ENSG00000155011	1
ENSG00000136026	-0.902599
ENSG00000077585	-0.944315
ENSG00000136875	0.9057
ENSG00000168468	-0.905464
ENSG00000184220	0.905294
ENSG00000126947	-0.90671
ENSG00000144034	0.911705
ENSG00000168710	-0.938483
ENSG00000137414	-0.921996
ENSG00000197857	0.937816
ENSG00000169439	-0.954629
ENSG00000066455	-0.964222
ENSG00000155158	-0.916586
ENSG00000099822	-0.93606
ENSG00000239521	-0.918695
ENSG00000225031	-0.921626
ENSG00000134278	-0.903558
ENSG00000137814	0.905054
ENSG00000113580	-0.912577
ENSG00000005302	-0.953503
ENSG00000145354	0.945185
ENSG00000133112	-0.949571
ENSG00000123908	-0.963803
ENSG00000104324	-0.931227
ENSG00000048707	-0.915033
ENSG00000182831	-0.924497
ENSG00000105643	-0.920283
ENSG00000152127	-0.921968
ENSG00000149289	-0.920383
ENSG00000273831	0.919609
ENSG00000133805	-0.936102
ENSG00000104765	-0.912812
ENSG00000243317	-0.951189
ENSG00000110422	-0.940703
ENSG00000156273	-0.914545
ENSG00000112941	-0.949249
ENSG00000173905	-0.92586
ENSG00000146281	0.909368
ENSG00000053254	-0.921509
ENSG00000173559	-0.908102
ENSG00000072274	-0.95776
ENSG00000130559	-0.941932
ENSG00000146416	0.941225
ENSG00000034713	-0.939004
ENSG00000135677	-0.918493
ENSG00000112110	0.906486
ENSG00000267056	0.9402
ENSG00000260685	0.920447
ENSG00000172927	-0.90937
ENSG00000165178	-0.913305
ENSG00000082996	-0.902664
ENSG00000168300	-0.905281
ENSG00000113327	-0.929798
ENSG00000171467	-0.926685
ENSG00000158201	0.939825
ENSG00000112308	-0.907768
ENSG00000112406	-0.944381
ENSG00000182534	-0.929626
ENSG00000087266	-0.901295
ENSG00000123405	0.951526
ENSG00000161647	-0.920376
ENSG00000119943	-0.906871
ENSG00000234465	-0.926088
ENSG00000078142	-0.947731
ENSG00000227105	0.913719
ENSG00000162769	0.922721
ENSG00000164684	-0.932757
ENSG00000085382	0.932943
ENSG00000257043	0.91793
ENSG00000169188	0.933939
ENSG00000122986	-0.90345
ENSG00000166619	-0.928203
ENSG00000028137	-0.91458
ENSG00000137462	-0.908599
ENSG00000114405	0.908543
ENSG00000137193	-0.923609
ENSG00000197046	-0.933827
ENSG00000105993	-0.947938
ENSG00000120727	-0.926982
ENSG00000155254	-0.923126
ENSG00000139133	0.908383
ENSG00000119537	-0.936369
ENSG00000127526	-0.927006
ENSG00000214973	0.936222
ENSG00000197102	-0.907283
ENSG00000163872	0.929565
ENSG00000168264	-0.925696
ENSG00000112759	0.919745
ENSG00000172508	-0.906072
ENSG00000106153	0.902242
ENSG00000225131	0.909043
ENSG00000128973	0.918751
ENSG00000169047	-0.957158
ENSG00000164916	-0.912374
ENSG00000197321	-0.903925
ENSG00000048392	-0.942393
ENSG00000168461	-0.923417
ENSG00000179399	0.933532
ENSG00000013374	-0.935463
ENSG00000241721	-0.90414
ENSG00000133657	-0.92493
ENSG00000243508	0.920193
ENSG00000116198	-0.922253
ENSG00000258501	-0.914326
ENSG00000120051	-0.910737
ENSG00000127533	-0.943025
ENSG00000100626	-0.928062

## Sheet: correlated to lnc-DKK2
ENSEMBL ID	Pearson's correlation coefficient (PCC)
ENSG00000160191	-0.901704
ENSG00000119669	-0.923276
ENSG00000155011	0.908592
ENSG00000165178	-0.932429
ENSG00000155749	0.91369
ENSG00000123405	0.926711
ENSG00000169684	0.919527

## Sheet: lncRNAs correlated to CYP1B1
lncRNA (ENSEMBL ID)	Pearson's correlation coefficient (PCC)
ENSG00000232973	0.989317
ENSG00000233061	-0.923724
ENSG00000231106	0.920854
ENSG00000177406	0.979315
ENSG00000262097	0.911715
ENSG00000272668	0.928675
ENSG00000271122	0.929427
ENSG00000249628	0.979304
ENSG00000285722	0.944285
ENSG00000258875	0.977174
ENSG00000247982	0.905624
ENSG00000250033	0.986729
ENSG00000253123	0.970617
ENSG00000260920	0.912427
ENSG00000234380	0.950921
ENSG00000224596	0.982003
ENSG00000228878	0.976581
ENSG00000247774	-0.947887
ENSG00000179082	0.955004
ENSG00000253698	0.915619
ENSG00000249171	0.950264
ENSG00000253552	0.911584
ENSG00000246263	0.933712
ENSG00000266456	-0.94824
ENSG00000284882	0.909884
ENSG00000279447	0.912051
ENSG00000281649	0.95714
ENSG00000254635	0.936288
ENSG00000281398	0.908299
ENSG00000273270	0.953321
ENSG00000245904	0.955366
ENSG00000250472	-0.950488
ENSG00000260032	0.9552
ENSG00000257702	0.949823
ENSG00000236008	0.971218
ENSG00000234869	0.918569
ENSG00000273669	0.938288
ENSG00000246273	0.911692
ENSG00000235531	0.941257
ENSG00000246451	0.904227
ENSG00000182648	0.967027
ENSG00000244300	0.975227

## Sheet: lncRNAs correlated toCYP1B1-AS1
lncRNA (ENSEMBL ID)	Pearson's correlation coefficient (PCC)
ENSG00000231106	0.93939
ENSG00000177406	0.9794
ENSG00000262097	0.930493
ENSG00000272668	0.927573
ENSG00000271122	0.9069
ENSG00000249628	0.977031
ENSG00000285722	0.955398
ENSG00000258875	0.956471
ENSG00000247982	0.910645
ENSG00000250033	0.962086
ENSG00000253123	0.962743
ENSG00000260920	0.907238
ENSG00000234380	0.93455
ENSG00000279811	0.916508
ENSG00000285410	0.91146
ENSG00000224596	0.980564
ENSG00000228878	0.966831
ENSG00000247774	-0.941692
ENSG00000179082	0.981609
ENSG00000253698	0.950447
ENSG00000249171	0.943511
ENSG00000253552	0.901166
ENSG00000231393	0.931389
ENSG00000246263	0.910908
ENSG00000266456	-0.913161
ENSG00000284882	0.918736
ENSG00000279447	0.918874
ENSG00000281649	0.953475
ENSG00000254635	0.920889
ENSG00000206417	-0.905825
ENSG00000273270	0.956908
ENSG00000274776	-0.907552
ENSG00000245904	0.919967
ENSG00000250472	-0.929655
ENSG00000260032	0.95089
ENSG00000257702	0.967838
ENSG00000236008	0.952409
ENSG00000234869	0.904411
ENSG00000273669	0.922434
ENSG00000272654	0.901138
ENSG00000235531	0.906606
ENSG00000182648	0.942051
ENSG00000244300	0.97947
ENSG00000286059	0.934553

## Sheet: lncRNAs correlated to DKK2
lncRNA (ENSEMBL ID)	Pearson's correlation coefficient (PCC)
ENSG00000203709	-0.956692
ENSG00000262097	-0.963726
ENSG00000235897	-0.910847
ENSG00000229267	0.900215
ENSG00000280079	0.914307
ENSG00000235865	-0.919814
ENSG00000260920	-0.911344
ENSG00000231652	-0.934525
ENSG00000253698	-0.914493
ENSG00000267383	0.964496
ENSG00000285591	-0.940167
ENSG00000227028	0.900164
ENSG00000231393	-0.903378
ENSG00000286147	0.908592
ENSG00000227598	0.939388
ENSG00000204860	0.906193
ENSG00000236345	-0.903581
ENSG00000260032	-0.921002
ENSG00000278862	-0.920708
ENSG00000230826	0.903468
ENSG00000232995	0.917686
