# Supplementary material for: CYP1B1-AS1 regulates CYP1B1 to promote Coxiella burnetii pathogenesis by inhibiting ROS and host cell death.
Source: Research Square preprint supplement (doi:10.21203/rs.3.rs-5390645/v1), 2024-12-11
Supplement: Supplementary file 5 [file Data S6. Mass Spectrometry Results of 3X-FLAG-CYP1B1 Immunoprecipitation Analysis and Peptide Information.xlsx]

## Sheet: Sheet1
	CYP1B1-AS1 regulates CYP1B1 to promote Coxiella burnetii pathogenesis by inhibiting ROS and host cell death.
	Arunima et al. 2024
	Data S6. Mass Spectrometry Results of 3XFLAG-CYP1B1 Immunoprecipitation Analysis and Peptide Information

## Sheet: Sample details
Sample Id	Sample Name	Organism	Add. info (lysate, IP,etc)	Cell line
1173151	G1	Homo sapiens	FLAG-IP	HEK293T transfected with pcDNA3.1 vector expressing N-term-3XFLAG tagged GFP
1173152	G2	Homo sapiens	FLAG-IP	HEK293T transfected with pcDNA3.1 vector expressing N-term-3XFLAG tagged GFP
1173153	C1	Homo sapiens	FLAG-IP	HEK293T transfected with pcDNA3.1 vector expressing N-term-3XFLAG tagged CYP1B1
1173154	C2	Homo sapiens	FLAG-IP	HEK293T transfected with pcDNA3.1 vector expressing N-term-3XFLAG tagged CYP1B1
1173155	C3	Homo sapiens	FLAG-IP	HEK293T transfected with pcDNA3.1 vector expressing N-term-3XFLAG tagged CYP1B1 and infected with C.burnetii NMII
1173156	C4	Homo sapiens	FLAG-IP	HEK293T transfected with pcDNA3.1 vector expressing N-term-3XFLAG tagged CYP1B1 and infected with C.burnetii NMII

## Sheet: Proteins
Protein FDR Confidence Combined	Master	Accession	Description	% Coverage	# Peptides	# PSMs	# Unique Peptides	MW in kDa	Gene Symbol	Abundance ECL1_1173151	Abundance ECL1_1173152	Average GFP	Abundance ECL1_1173153	Abundance ECL1_1173154	Average C1 and C2	Abundance ECL1_1173155	Abundance ECL1_1173156	Average C3 and C4	Determining abudance in C1 and C2	Determining abudance in C3 and C4
High	Master Protein	ARI66080.1	molecular chaperone DnaK [Coxiella burnetii]	3	2	5	1	70.7	dnaK			#DIV/0!	1.34536e+06	1.76363e+06	1.5545e+06	1.28136e+06	1.57273e+06	1.42704e+06	#DIV/0!	#DIV/0!
High	Master Protein	ARI65349.1	hypothetical protein B7L74_02420 [Coxiella burnetii]	5	1	2	1	45.4		27307808	12325892	19816850	1169211264	741388544	955299904	657482432	636770880	647126656	935483054	627309806
Medium	Master Protein	ARI66923.1	chromosome partitioning protein ParA (plasmid) [Coxiella burnetii]	2	1	1	1	45.6	orf 406; qsopA			#DIV/0!	1.4707e+06	1.01872e+06	1.24471e+06	1.77495e+06	920936	1.34794e+06	#DIV/0!	#DIV/0!
Medium	Master Protein	ARI66478.1	molecular chaperone GroEL [Coxiella burnetii]	2	1	1	1	58.2	groEL			#DIV/0!			#DIV/0!	410192	459760	434976	#DIV/0!	#DIV/0!
Medium	Master Protein	ARI66904.1	hypothetical protein B7L74_10935 (plasmid) [Coxiella burnetii]	5	1	1	1	28		226517136	198915936	212716536			#DIV/0!			#DIV/0!	#DIV/0!	#DIV/0!
Medium	Master Protein	ARI65574.1	uridine phosphorylase [Coxiella burnetii]	9	1	1	1	31.2		3499939	522538	2.01124e+06	925622	2.42356e+06	1.67459e+06	2844198	2.11296e+06	2.47858e+06	-336650	467340
Medium	Master Protein	ARI66814.1	acyltransferase [Coxiella burnetii]	3	1	1	1	35.6				#DIV/0!	2.59018e+06	2375680	2.48293e+06	1883490	2353029	2.11826e+06	#DIV/0!	#DIV/0!
Medium	Master Protein	ARI65364.1	23S rRNA pseudouridine(955/2504/2580) synthase [Coxiella burnetii]	3	1	1	1	34.7	rluC			#DIV/0!			#DIV/0!			#DIV/0!	#DIV/0!	#DIV/0!
High	Master Protein	ARI65702.1	alanine racemase [Coxiella burnetii]	5	1	1	1	39.9	alr			#DIV/0!			#DIV/0!			#DIV/0!	#DIV/0!	#DIV/0!
Medium	Master Protein	ARI65764.1	hypothetical protein B7L74_04780 [Coxiella burnetii] CBU_0937	3	1	1	1	53.4				#DIV/0!			#DIV/0!			#DIV/0!	#DIV/0!	#DIV/0!
Medium	Master Protein	ARI66255.1	hypothetical protein B7L74_07645 [Coxiella burnetii]	6	1	1	1	28.4				#DIV/0!			#DIV/0!			#DIV/0!	#DIV/0!	#DIV/0!
Medium	Master Protein	ARI66753.1	DNA-binding response regulator [Coxiella burnetii]	8	1	1	1	27.3				#DIV/0!			#DIV/0!			#DIV/0!	#DIV/0!	#DIV/0!
												#DIV/0!			#DIV/0!			#DIV/0!	#DIV/0!	#DIV/0!
High	Master Protein	Q16678	Cytochrome P450 1B1 OS=Homo sapiens OX=9606 GN=CYP1B1 PE=1 SV=2	84	59	3383	59	60.8	CYP1B1	7.47043e+07	5.61069e+07	6.54056e+07	1.03075e+11	9.07692e+10	9.69221e+10	8.88004e+10	9.44936e+10	9.1647e+10	9.68567e+10	9.15816e+10
High	Master Protein	P07437	Tubulin beta chain OS=Homo sapiens OX=9606 GN=TUBB PE=1 SV=2	86	41	1969	8	49.6	TUBB	1.30106e+09	7.91348e+08	1.0462e+09	3.40632e+10	2.9228e+10	3.16456e+10	2.42162e+10	2.60068e+10	2.51115e+10	3.05994e+10	2.40653e+10
High	Master Protein	P68371	Tubulin beta-4B chain OS=Homo sapiens OX=9606 GN=TUBB4B PE=1 SV=1	86	39	1528	2	49.8	TUBB4B	8.99273e+07	5.9041e+07	7.44841e+07	2.13608e+09	1.59345e+09	1.86476e+09	1.48192e+09	1.51884e+09	1.50038e+09	1.79028e+09	1.4259e+09
High	Master Protein	P60709	Actin, cytoplasmic 1 OS=Homo sapiens OX=9606 GN=ACTB PE=1 SV=1	89	38	1516	15	41.7	ACTB	1.60165e+10	8.21942e+09	1.2118e+10	4.07467e+10	3.36354e+10	3.7191e+10	1.84893e+10	2.27544e+10	2.06218e+10	2.50731e+10	8.50384e+09
High	Master Protein	Q9BVA1	Tubulin beta-2B chain OS=Homo sapiens OX=9606 GN=TUBB2B PE=1 SV=1	85	36	1410	2	49.9	TUBB2B	1.8528e+07	7.05853e+06	1.27933e+07	3.64734e+08	4.00152e+08	3.82443e+08	3.46199e+08	3.31282e+08	338740346	3.6965e+08	3.25947e+08
High	Master Protein	Q13885	Tubulin beta-2A chain OS=Homo sapiens OX=9606 GN=TUBB2A PE=1 SV=1	76	35	1363	2	49.9	TUBB2A	1.95624e+06	1.29647e+06	1.62636e+06	36638387	3.2075e+07	3.43567e+07	2.57277e+07	2.62363e+07	2.5982e+07	3.27303e+07	2.43557e+07
High	Master Protein	P04350	Tubulin beta-4A chain OS=Homo sapiens OX=9606 GN=TUBB4A PE=1 SV=2	83	32	1342	4	49.6	TUBB4A	2.19383e+06	1.70727e+06	1.95055e+06	8.68699e+07	7.70587e+07	8.19643e+07	6.64537e+07	7.09974e+07	6.87255e+07	8.00137e+07	6.6775e+07
High	Master Protein	Q9BQE3	Tubulin alpha-1C chain OS=Homo sapiens OX=9606 GN=TUBA1C PE=1 SV=1	75	40	1107	2	49.9	TUBA1C	6.3658e+08	4.25818e+08	5.31199e+08	2.50193e+10	2.23727e+10	2.3696e+10	1.86654e+10	1.95993e+10	1.91324e+10	2.31648e+10	1.86012e+10
High	Master Protein	Q71U36	Tubulin alpha-1A chain OS=Homo sapiens OX=9606 GN=TUBA1A PE=1 SV=1	75	39	1070	1	50.1	TUBA1A	1.93696e+07	7.82889e+06	1.35993e+07	5.27948e+08	9.48744e+08	7.38346e+08	7.21866e+08	6.85919e+08	7.03892e+08	7.24747e+08	6.90293e+08
High	Master Protein	Q9BUF5	Tubulin beta-6 chain OS=Homo sapiens OX=9606 GN=TUBB6 PE=1 SV=1	82	28	895	14	49.8	TUBB6	4.09816e+06	3.51171e+06	3.80494e+06	2.98079e+08	2.51268e+08	2.74673e+08	2.00712e+08	2.30669e+08	2.15691e+08	2.70868e+08	2.11886e+08
High	Master Protein	P68366	Tubulin alpha-4A chain OS=Homo sapiens OX=9606 GN=TUBA4A PE=1 SV=1	59	30	879	6	49.9	TUBA4A	1.30831e+07	3.79067e+06	8.43687e+06	476834882	8.33707e+08	6.55271e+08	7.86471e+08	7.64968e+08	7.7572e+08	6.46834e+08	7.67283e+08
High	Master Protein	Q13509	Tubulin beta-3 chain OS=Homo sapiens OX=9606 GN=TUBB3 PE=1 SV=2	53	24	833	5	50.4	TUBB3	551939		551939	1.29643e+07	1.18453e+07	1.24048e+07	7813320	8.2388e+06	8.02606e+06	1.18529e+07	7.47412e+06
High	Master Protein	A0A075B6S2	Immunoglobulin kappa variable 2D-29 OS=Homo sapiens OX=9606 GN=IGKV2D-29 PE=3 SV=1	19	5	814	4	13.1	IGKV2D-29	1.92177e+10	1.86412e+10	1.89295e+10	4.71063e+10	3.28691e+10	3.99877e+10	2.82167e+10	3.23456e+10	3.02812e+10	2.10582e+10	1.13517e+10
High	Master Protein	P78527	DNA-dependent protein kinase catalytic subunit OS=Homo sapiens OX=9606 GN=PRKDC PE=1 SV=3	52	205	780	205	468.8	PRKDC	3.80125e+07	3.80196e+07	3.80161e+07	2.6902e+09	2.46669e+09	2.57844e+09	1.76213e+09	1.69345e+09	1.72779e+09	2.54043e+09	1.68977e+09
High	Master Protein	P05141	ADP/ATP translocase 2 OS=Homo sapiens OX=9606 GN=SLC25A5 PE=1 SV=7	89	45	774	22	32.8	SLC25A5	5.96481e+08	4.85452e+08	5.40967e+08	1.11216e+10	7.72633e+09	9.42398e+09	6.3149e+09	7.32868e+09	6.82179e+09	8.88302e+09	6.28082e+09
High	Master Protein	P68032	Actin, alpha cardiac muscle 1 OS=Homo sapiens OX=9606 GN=ACTC1 PE=1 SV=1	50	22	769	4	42	ACTC1	9.454e+07	1.67217e+07	5.56308e+07	5.91813e+08	2.95331e+08	4.43572e+08	2.08296e+08	2.42002e+08	225149148	3.87941e+08	1.69518e+08
High	Master Protein	P35580	Myosin-10 OS=Homo sapiens OX=9606 GN=MYH10 PE=1 SV=3	64	147	650	129	228.9	MYH10	5.26039e+08	3.51555e+08	4.38797e+08	2.24951e+09	1.47659e+09	1.86305e+09	7.99316e+08	8.63185e+08	8.31251e+08	1.42426e+09	3.92454e+08
High	Master Protein	P12236	ADP/ATP translocase 3 OS=Homo sapiens OX=9606 GN=SLC25A6 PE=1 SV=4	82	35	580	9	32.8	SLC25A6	3.38676e+07	3.05648e+07	3.22162e+07	6.91867e+08	5.5912e+08	6.25493e+08	3.92992e+08	4.5165e+08	4.22321e+08	5.93277e+08	3.90105e+08
High	Master Protein	P05023	Sodium/potassium-transporting ATPase subunit alpha-1 OS=Homo sapiens OX=9606 GN=ATP1A1 PE=1 SV=1	55	65	528	42	112.8	ATP1A1	7.38616e+07	5.22208e+07	6.30412e+07	5.45367e+09	4.37578e+09	4.91473e+09	4.05465e+09	4.34021e+09	4.19743e+09	4.85169e+09	4.13439e+09
High	Master Protein	P52732	Kinesin-like protein KIF11 OS=Homo sapiens OX=9606 GN=KIF11 PE=1 SV=2	75	86	466	86	119.1	KIF11	1.00129e+07	7.52871e+06	8.7708e+06	3.69171e+09	2.57946e+09	3.13559e+09	2.31218e+09	2.44609e+09	2.37914e+09	3.12682e+09	2.37037e+09
High	Master Protein	P0DMV9	Heat shock 70 kDa protein 1B OS=Homo sapiens OX=9606 GN=HSPA1B PE=1 SV=1	91	64	466	33	70	HSPA1B	5.60383e+08	3.51785e+08	4.56084e+08	5.04779e+09	4.54115e+09	4.79447e+09	4.62547e+09	5.10223e+09	4.86385e+09	4.33838e+09	4.40777e+09
High	Master Protein	P35579	Myosin-9 OS=Homo sapiens OX=9606 GN=MYH9 PE=1 SV=4	53	104	448	83	226.4	MYH9	2.10565e+08	1.6236e+08	1.86463e+08	6.39209e+08	5.17364e+08	5.78286e+08	2.49881e+08	2.6277e+08	2.56325e+08	3.91824e+08	6.98629e+07
High	Master Protein	Q6S8J3	POTE ankyrin domain family member E OS=Homo sapiens OX=9606 GN=POTEE PE=2 SV=3	10	11	440	1	121.3	POTEE			#DIV/0!	7.97979e+06		7.97979e+06		3583733	3583733	#DIV/0!	#DIV/0!
High	Master Protein	P11142	Heat shock cognate 71 kDa protein OS=Homo sapiens OX=9606 GN=HSPA8 PE=1 SV=1	76	55	423	45	70.9	HSPA8	2.25808e+08	1.51925e+08	1.88866e+08	2.78e+09	2.6681e+09	2.72405e+09	2.48485e+09	2.7742e+09	2.62953e+09	2.53518e+09	2.44066e+09
High	Master Protein	P12235	ADP/ATP translocase 1 OS=Homo sapiens OX=9606 GN=SLC25A4 PE=1 SV=4	67	24	416	4	33	SLC25A4	505910	443556	474733	1.87778e+07	1.36891e+07	1.62334e+07	9.98654e+06	1.34655e+07	1.1726e+07	1.57587e+07	1.12513e+07
High	Master Protein	Q562R1	Beta-actin-like protein 2 OS=Homo sapiens OX=9606 GN=ACTBL2 PE=1 SV=2	23	9	399	2	42	ACTBL2	376096		376096	532900	328892	430896			#DIV/0!	54800.6	#DIV/0!
High	Master Protein	P16615	Sarcoplasmic/endoplasmic reticulum calcium ATPase 2 OS=Homo sapiens OX=9606 GN=ATP2A2 PE=1 SV=1	50	61	393	61	114.7	ATP2A2	3.57186e+07	2.8498e+07	3.21083e+07	2.91574e+09	2.50382e+09	2.70978e+09	2.24341e+09	2.3631e+09	2.30326e+09	2.67767e+09	2.27115e+09
High	Master Protein	Q14204	Cytoplasmic dynein 1 heavy chain 1 OS=Homo sapiens OX=9606 GN=DYNC1H1 PE=1 SV=5	35	128	366	128	532.1	DYNC1H1	3.08523e+07	2.60468e+07	2.84495e+07	5.21765e+08	3.94807e+08	4.58286e+08	3.1469e+08	3.08439e+08	3.11565e+08	4.29837e+08	2.83115e+08
High	Master Protein	P10809	60 kDa heat shock protein, mitochondrial OS=Homo sapiens OX=9606 GN=HSPD1 PE=1 SV=2	87	54	351	54	61	HSPD1	8.39119e+07	4.77252e+07	6.58186e+07	1.19523e+09	1.18957e+09	1192400921	9.64602e+08	1.10029e+09	1.03244e+09	1.12658e+09	9.66626e+08
High	Master Protein	Q92616	Stalled ribosome sensor GCN1 OS=Homo sapiens OX=9606 GN=GCN1 PE=1 SV=7	44	103	342	103	292.5	GCN1	1.08188e+07	9.92764e+06	1.03732e+07	6.61592e+08	6.16772e+08	6.39182e+08	3.02546e+08	2.13165e+08	2.57856e+08	6.28809e+08	2.47483e+08
High	Master Protein	P25705	ATP synthase subunit alpha, mitochondrial OS=Homo sapiens OX=9606 GN=ATP5F1A PE=1 SV=1	68	41	276	41	59.7	ATP5F1A	1.16294e+08	7.63547e+07	9.63244e+07	1.34546e+09	1.17926e+09	1.26236e+09	7.92629e+08	9.99817e+08	8.96223e+08	1.16603e+09	7.99899e+08
High	Master Protein	P08238	Heat shock protein HSP 90-beta OS=Homo sapiens OX=9606 GN=HSP90AB1 PE=1 SV=4	58	45	266	26	83.2	HSP90AB1	2.11658e+08	1.66633e+08	1.89145e+08	1.3092e+09	9.34867e+08	1.12203e+09	8.58911e+08	9.76193e+08	9.17552e+08	9.32888e+08	7.28407e+08
High	Master Protein	P04843	Dolichyl-diphosphooligosaccharide--protein glycosyltransferase subunit 1 OS=Homo sapiens OX=9606 GN=RPN1 PE=1 SV=1	71	46	262	46	68.5	RPN1	1.98532e+07	1.36938e+07	1.67735e+07	1.85199e+09	1.38509e+09	1.61854e+09	1.26575e+09	1.47479e+09	1.37027e+09	1.60176e+09	1.3535e+09
High	Master Protein	O43592	Exportin-T OS=Homo sapiens OX=9606 GN=XPOT PE=1 SV=2	67	55	253	55	109.9	XPOT	1.06068e+07	6.52064e+06	8.56372e+06	1.08692e+09	8.18438e+08	9.52678e+08	8.00344e+08	8.28084e+08	8.14214e+08	9.44115e+08	8.0565e+08
High	Master Protein	P13637	Sodium/potassium-transporting ATPase subunit alpha-3 OS=Homo sapiens OX=9606 GN=ATP1A3 PE=1 SV=3	25	26	246	3	111.7	ATP1A3			#DIV/0!	1.87272e+06	1.90678e+06	1.88975e+06	1.36999e+06	1.4337e+06	1.40185e+06	#DIV/0!	#DIV/0!
High	Master Protein	P23396	Small ribosomal subunit protein uS3 OS=Homo sapiens OX=9606 GN=RPS3 PE=1 SV=2	85	29	243	29	26.7	RPS3	4.36307e+08	2.88164e+08	3.62236e+08	1.41482e+09	1.19292e+09	1.30387e+09	9.66515e+08	1.25389e+09	1.1102e+09	9.4163e+08	7.47969e+08
High	Master Protein	P11021	Endoplasmic reticulum chaperone BiP OS=Homo sapiens OX=9606 GN=HSPA5 PE=1 SV=2	62	42	228	40	72.3	HSPA5	7.43844e+07	4.50948e+07	5.97396e+07	6.10363e+08	4.90432e+08	5.50398e+08	4.42276e+08	5.01528e+08	4.71902e+08	4.90658e+08	4.12162e+08
High	Master Protein	P06576	ATP synthase subunit beta, mitochondrial OS=Homo sapiens OX=9606 GN=ATP5F1B PE=1 SV=3	74	29	228	29	56.5	ATP5F1B	4.02445e+07	2.18425e+07	3.10435e+07	8.83934e+08	7.21138e+08	8.02536e+08	4.75787e+08	5.40399e+08	5.08093e+08	7.71493e+08	4.77049e+08
High	Master Protein	P21333	Filamin-A OS=Homo sapiens OX=9606 GN=FLNA PE=1 SV=4	36	70	227	65	280.6	FLNA	1.34005e+08	8.80841e+07	1.11045e+08	3.02668e+08	2.1183e+08	2.57249e+08	130102977	1.12283e+08	1.21193e+08	1.46204e+08	1.01484e+07
High	Master Protein	P08670	Vimentin OS=Homo sapiens OX=9606 GN=VIM PE=1 SV=4	79	47	224	45	53.6	VIM	3.6839e+08	2.06026e+08	2.87208e+08	6.35564e+08	5.01618e+08	5.68591e+08	3.8863e+08	4.4983e+08	4.1923e+08	2.81384e+08	1.32022e+08
High	Master Protein	Q9UJS0	Electrogenic aspartate/glutamate antiporter SLC25A13, mitochondrial OS=Homo sapiens OX=9606 GN=SLC25A13 PE=1 SV=2	61	36	219	25	74.1	SLC25A13	5.46798e+07	4.39145e+07	4.92971e+07	8.82771e+08	7.16661e+08	7.99716e+08	6.51505e+08	6.78834e+08	6.6517e+08	7.50419e+08	6.15873e+08
High	Master Protein	Q16891	MICOS complex subunit MIC60 OS=Homo sapiens OX=9606 GN=IMMT PE=1 SV=1	70	56	208	56	83.6	IMMT	7.84442e+06	7.47693e+06	7.66067e+06	6.21788e+08	4.47044e+08	5.34416e+08	4.36457e+08	4.71085e+08	4.53771e+08	5.26755e+08	4.46111e+08
High	Master Protein	O14654	Insulin receptor substrate 4 OS=Homo sapiens OX=9606 GN=IRS4 PE=1 SV=1	44	46	203	46	133.7	IRS4	5.79063e+07	4.1301e+07	4.96037e+07	5.77495e+08	4.55703e+08	5.16599e+08	3.34908e+08	3.6948e+08	3.52194e+08	4.66996e+08	3.0259e+08
High	Master Protein	P38646	Stress-70 protein, mitochondrial OS=Homo sapiens OX=9606 GN=HSPA9 PE=1 SV=2	52	33	198	32	73.6	HSPA9	7.95142e+07	5.9011e+07	6.92626e+07	5.27496e+08	4.67941e+08	4.97719e+08	381979861	4.33532e+08	4.07756e+08	4.28456e+08	3.38493e+08
High	Master Protein	Q9NVI7	ATPase family AAA domain-containing protein 3A OS=Homo sapiens OX=9606 GN=ATAD3A PE=1 SV=2	60	39	194	19	71.3	ATAD3A	4.36887e+07	3.70668e+07	4.03777e+07	9.99952e+08	8.55058e+08	9.27505e+08	5.98773e+08	7.25855e+08	6.62314e+08	8.87127e+08	6.21936e+08
High	Master Protein	Q9H583	HEAT repeat-containing protein 1 OS=Homo sapiens OX=9606 GN=HEATR1 PE=1 SV=3	39	68	193	68	242.2	HEATR1	5.23592e+06	3.50397e+06	4.36995e+06	3.83949e+08	2.99741e+08	3.41845e+08	2.11162e+08	1.75113e+08	1.93138e+08	3.37475e+08	1.88768e+08
High	Master Protein	P27708	CAD protein OS=Homo sapiens OX=9606 GN=CAD PE=1 SV=3	32	54	191	54	242.8	CAD	4.29309e+07	4.01387e+07	4.15348e+07	3.53941e+08	2.94146e+08	3.24043e+08	2.04564e+08	1.91723e+08	1.98144e+08	2.82509e+08	1.56609e+08
High	Master Protein	P61978	Heterogeneous nuclear ribonucleoprotein K OS=Homo sapiens OX=9606 GN=HNRNPK PE=1 SV=1	57	27	191	27	50.9	HNRNPK	6.76018e+07	4.25519e+07	5.50769e+07	4.51137e+08	4.25933e+08	4.38535e+08	3.61798e+08	4.1136e+08	3.86579e+08	3.83458e+08	3.31502e+08
High	Master Protein	P52272	Heterogeneous nuclear ribonucleoprotein M OS=Homo sapiens OX=9606 GN=HNRNPM PE=1 SV=3	45	30	188	30	77.5	HNRNPM	6.16869e+07	4.03984e+07	5.10427e+07	2.5461e+08	2.12938e+08	2.33774e+08	1.72799e+08	1.93637e+08	1.83218e+08	1.82731e+08	1.32175e+08
High	Master Protein	P49411	Elongation factor Tu, mitochondrial OS=Homo sapiens OX=9606 GN=TUFM PE=1 SV=3	73	31	185	31	49.8	TUFM	5.09445e+07	3.21595e+07	4.1552e+07	5.05089e+08	3.55905e+08	4.30497e+08	3.19779e+08	3.94379e+08	3.57079e+08	3.88945e+08	3.15527e+08
High	Master Protein	O14980	Exportin-1 OS=Homo sapiens OX=9606 GN=XPO1 PE=1 SV=1	48	45	185	45	123.3	XPO1	9.09404e+06	6.66328e+06	7.87866e+06	4.85534e+08	3.81964e+08	4.33749e+08	2.94927e+08	2.85589e+08	2.90258e+08	4.2587e+08	2.82379e+08
High	Master Protein	O95831	Apoptosis-inducing factor 1, mitochondrial OS=Homo sapiens OX=9606 GN=AIFM1 PE=1 SV=1	58	31	181	31	66.9	AIFM1	2.00202e+07	1.4643e+07	1.73316e+07	6.04445e+08	549151607	5.76798e+08	4.62325e+08	5.46442e+08	5.04383e+08	5.59467e+08	4.87052e+08
High	Master Protein	P07900	Heat shock protein HSP 90-alpha OS=Homo sapiens OX=9606 GN=HSP90AA1 PE=1 SV=5	39	34	179	17	84.6	HSP90AA1	4.24022e+07	3.57204e+07	3.90613e+07	1.15056e+08	8.17904e+07	9.84232e+07	6.82998e+07	9.03942e+07	7.9347e+07	5.93619e+07	4.02857e+07
High	Master Protein	P68104	Elongation factor 1-alpha 1 OS=Homo sapiens OX=9606 GN=EEF1A1 PE=1 SV=1	61	27	177	27	50.1	EEF1A1	3.18661e+08	2.07488e+08	2.63074e+08	2.24202e+09	1.75254e+09	1.99728e+09	1.506e+09	1.68562e+09	1.59581e+09	1.73421e+09	1.33273e+09
High	Master Protein	Q15149	Plectin OS=Homo sapiens OX=9606 GN=PLEC PE=1 SV=3	17	71	176	70	531.5	PLEC	6.83282e+07	5.60438e+07	6.2186e+07	7.38651e+07	56612378	6.52387e+07	4.40617e+07	4.43339e+07	4.41978e+07	3.05272e+06	-1.79882e+07
High	Master Protein	P50993	Sodium/potassium-transporting ATPase subunit alpha-2 OS=Homo sapiens OX=9606 GN=ATP1A2 PE=1 SV=1	19	19	175	1	112.2	ATP1A2			#DIV/0!	3.62177e+06	2.54921e+06	3.08549e+06	2.81313e+06	2.43569e+06	2.62441e+06	#DIV/0!	#DIV/0!
High	Master Protein	P20700	Lamin-B1 OS=Homo sapiens OX=9606 GN=LMNB1 PE=1 SV=2	66	45	174	40	66.4	LMNB1	3.92595e+07	2.72289e+07	3.32442e+07	5.47445e+08	4.57603e+08	5.02524e+08	3.4282e+08	3.8861e+08	365714774	4.6928e+08	3.32471e+08
High	Master Protein	Q9NVI1	Fanconi anemia group I protein OS=Homo sapiens OX=9606 GN=FANCI PE=1 SV=4	48	54	172	54	149.2	FANCI	620314	1.64319e+06	1.13175e+06	3.92491e+08	3.07774e+08	3.50133e+08	2.70887e+08	2.50392e+08	2.6064e+08	3.49001e+08	2.59508e+08
High	Master Protein	P49327	Fatty acid synthase OS=Homo sapiens OX=9606 GN=FASN PE=1 SV=3	29	52	169	52	273.3	FASN	3.01527e+07	2.9291e+07	2.97219e+07	1.7232e+08	1.19674e+08	1.45997e+08	1.07265e+08	1.02962e+08	1.05114e+08	1.16275e+08	7.53918e+07
High	Master Protein	P31943	Heterogeneous nuclear ribonucleoprotein H OS=Homo sapiens OX=9606 GN=HNRNPH1 PE=1 SV=4	62	20	169	13	49.2	HNRNPH1	7.15096e+07	5.42094e+07	6.28595e+07	9.66566e+08	7.68817e+08	8.67692e+08	6.39055e+08	727026684	6.83041e+08	8.04832e+08	6.20181e+08
High	Master Protein	P17066	Heat shock 70 kDa protein 6 OS=Homo sapiens OX=9606 GN=HSPA6 PE=1 SV=2	29	20	167	4	71	HSPA6		217741	217741	5.51435e+06	5879710	5.69703e+06	4.44544e+06	4.44561e+06	4.44552e+06	5.47929e+06	4.22778e+06
High	Master Protein	Q92621	Nuclear pore complex protein Nup205 OS=Homo sapiens OX=9606 GN=NUP205 PE=1 SV=3	30	51	157	51	227.8	NUP205	2.92921e+06	3.66376e+06	3.29649e+06	2.29129e+08	1.90314e+08	2.09722e+08	1.45013e+08	1.28244e+08	1.36628e+08	2.06425e+08	1.33332e+08
High	Master Protein	Q8N1F7	Nuclear pore complex protein Nup93 OS=Homo sapiens OX=9606 GN=NUP93 PE=1 SV=2	57	42	157	42	93.4	NUP93	1.18078e+07	8.02847e+06	9.91814e+06	3.08144e+08	2.49483e+08	2.78813e+08	2.48345e+08	2.66125e+08	2.57235e+08	2.68895e+08	2.47317e+08
High	Master Protein	P13639	Elongation factor 2 OS=Homo sapiens OX=9606 GN=EEF2 PE=1 SV=4	55	37	150	36	95.3	EEF2	1.22397e+08	8.78542e+07	1.05125e+08	2.51963e+08	2.13199e+08	2.32581e+08	1.82997e+08	1.96596e+08	1.89796e+08	1.27455e+08	8.46709e+07
High	Master Protein	O75746	Electrogenic aspartate/glutamate antiporter SLC25A12, mitochondrial OS=Homo sapiens OX=9606 GN=SLC25A12 PE=1 SV=2	61	34	149	23	74.7	SLC25A12	1.97062e+07	1.46413e+07	1.71737e+07	1.7947e+08	1.6755e+08	1.7351e+08	1.46876e+08	1.72688e+08	1.59782e+08	1.56336e+08	1.42608e+08
High	Master Protein	O95071	E3 ubiquitin-protein ligase UBR5 OS=Homo sapiens OX=9606 GN=UBR5 PE=1 SV=2	25	50	148	50	309.2	UBR5	2.52288e+06	2.9501e+06	2.73649e+06	2.19589e+08	1.67009e+08	1.93299e+08	1.4879e+08	1.48631e+08	1.4871e+08	1.90563e+08	1.45974e+08
High	Master Protein	P20020	Plasma membrane calcium-transporting ATPase 1 OS=Homo sapiens OX=9606 GN=ATP2B1 PE=1 SV=4	37	38	143	22	134.6	ATP2B1	1.97432e+06	1.95344e+06	1.96388e+06	3.39813e+08	2.42373e+08	2.91093e+08	2.10964e+08	2.31224e+08	2.21094e+08	2.89129e+08	2.1913e+08
High	Master Protein	P62979	Ubiquitin-ribosomal protein eS31 fusion protein OS=Homo sapiens OX=9606 GN=RPS27A PE=1 SV=2	46	12	140	12	18	RPS27A	1.81485e+08	1.22068e+08	1.51776e+08	1.35518e+09	9.67344e+08	1.16126e+09	7.89492e+08	8.63125e+08	826308651	1.00949e+09	6.74532e+08
High	Master Protein	P07814	Bifunctional glutamate/proline--tRNA ligase OS=Homo sapiens OX=9606 GN=EPRS1 PE=1 SV=5	37	45	139	45	170.5	EPRS1	3.61397e+07	3.04259e+07	3.32828e+07	1.35616e+08	1.02023e+08	1.1882e+08	8.26619e+07	9.09942e+07	8.6828e+07	8.5537e+07	5.35452e+07
High	Master Protein	O43175	D-3-phosphoglycerate dehydrogenase OS=Homo sapiens OX=9606 GN=PHGDH PE=1 SV=4	55	24	137	24	56.6	PHGDH	4.74067e+07	3.08069e+07	3.91068e+07	4.22973e+08	401196704	4.12085e+08	3.4994e+08	3.92747e+08	3.71344e+08	3.72978e+08	3.32237e+08
High	Master Protein	P25205	DNA replication licensing factor MCM3 OS=Homo sapiens OX=9606 GN=MCM3 PE=1 SV=3	48	34	135	34	90.9	MCM3	2.58697e+07	1.88455e+07	2.23576e+07	1.76832e+08	1.40102e+08	1.58467e+08	1.27411e+08	1.49376e+08	1.38394e+08	1.3611e+08	1.16036e+08
High	Master Protein	Q14974	Importin subunit beta-1 OS=Homo sapiens OX=9606 GN=KPNB1 PE=1 SV=2	58	34	132	34	97.1	KPNB1	3.07039e+07	1.82143e+07	2.44591e+07	3.62924e+08	2.98312e+08	3.30618e+08	2.82347e+08	2.8749e+08	2.84918e+08	3.06159e+08	2.60459e+08
High	Master Protein	P17987	T-complex protein 1 subunit alpha OS=Homo sapiens OX=9606 GN=TCP1 PE=1 SV=1	74	29	132	29	60.3	TCP1	4.33272e+07	3.49421e+07	3.91346e+07	2.38997e+08	2.48983e+08	2.4399e+08	2.10948e+08	2.34611e+08	2.22779e+08	2.04855e+08	1.83645e+08
High	Master Protein	P31689	DnaJ homolog subfamily A member 1 OS=Homo sapiens OX=9606 GN=DNAJA1 PE=1 SV=2	75	31	132	31	44.8	DNAJA1	7.39893e+06	4.53854e+06	5.96874e+06	6.31125e+08	5.24108e+08	5.77616e+08	4.08972e+08	5.42916e+08	4.75944e+08	5.71648e+08	4.69975e+08
High	Master Protein	P53621	Coatomer subunit alpha OS=Homo sapiens OX=9606 GN=COPA PE=1 SV=2	39	40	130	40	138.3	COPA	2.00044e+07	1.86996e+07	1.9352e+07	2.01708e+08	1.54826e+08	1.78267e+08	1.48614e+08	1.66958e+08	1.57786e+08	1.58915e+08	1.38434e+08
High	Master Protein	P27824	Calnexin OS=Homo sapiens OX=9606 GN=CANX PE=1 SV=2	51	31	129	30	67.5	CANX	3.03273e+06	1.40521e+06	2.21897e+06	5.66037e+08	3.23754e+08	4.44895e+08	3.37601e+08	4.03927e+08	3.70764e+08	4.42676e+08	3.68545e+08
High	Master Protein	Q00610	Clathrin heavy chain 1 OS=Homo sapiens OX=9606 GN=CLTC PE=1 SV=5	30	37	128	37	191.5	CLTC	4.10316e+07	3.60617e+07	3.85467e+07	1.08853e+08	7.63021e+07	9.25778e+07	6.68889e+07	7.57594e+07	7.13242e+07	5.40311e+07	3.27775e+07
High	Master Protein	Q00325	Solute carrier family 25 member 3 OS=Homo sapiens OX=9606 GN=SLC25A3 PE=1 SV=2	47	26	128	26	40.1	SLC25A3	6.43832e+07	5.17609e+07	5.80721e+07	1.52819e+09	1119789443	1.32399e+09	7.94058e+08	972420239	8.83239e+08	1.26592e+09	8.25167e+08
High	Master Protein	Q5T9A4	ATPase family AAA domain-containing protein 3B OS=Homo sapiens OX=9606 GN=ATAD3B PE=1 SV=1	40	26	127	6	72.5	ATAD3B	442582	1.41376e+06	928173	6.59687e+07	55538728	6.07537e+07	3.88316e+07	3.95674e+07	3.91995e+07	5.98256e+07	3.82713e+07
High	Master Protein	P42704	Leucine-rich PPR motif-containing protein, mitochondrial OS=Homo sapiens OX=9606 GN=LRPPRC PE=1 SV=3	35	38	126	38	157.8	LRPPRC	7.99826e+06	6.70625e+06	7.35226e+06	1.38313e+08	1.01338e+08	1.19826e+08	8.16889e+07	8.93386e+07	8.55137e+07	1.12473e+08	7.81615e+07
High	Master Protein	Q7Z6Z7	E3 ubiquitin-protein ligase HUWE1 OS=Homo sapiens OX=9606 GN=HUWE1 PE=1 SV=3	13	40	126	40	481.6	HUWE1	3.09755e+06	4.15446e+06	3.626e+06	7.82067e+07	6.19154e+07	7.00611e+07	4.75083e+07	4.18767e+07	4.46925e+07	6.64351e+07	4.10665e+07
High	Master Protein	Q9BXW9	Fanconi anemia group D2 protein OS=Homo sapiens OX=9606 GN=FANCD2 PE=1 SV=2	37	44	125	44	164	FANCD2	1.24249e+06	661345	951920	2.30652e+08	1.97165e+08	2.13908e+08	1.52138e+08	1.20638e+08	1.36388e+08	2.12956e+08	1.35436e+08
High	Master Protein	Q02978	Mitochondrial 2-oxoglutarate/malate carrier protein OS=Homo sapiens OX=9606 GN=SLC25A11 PE=1 SV=3	61	17	125	17	34	SLC25A11	3.97942e+07	3.34714e+07	3.66328e+07	7.09827e+08	5.18485e+08	6.14156e+08	3.67182e+08	5.48302e+08	4.57742e+08	5.77523e+08	4.21109e+08
High	Master Protein	O15027	Protein transport protein Sec16A OS=Homo sapiens OX=9606 GN=SEC16A PE=1 SV=4	28	41	124	41	251.7	SEC16A	5.20525e+06	3.54542e+06	4.37534e+06	2.08685e+08	1.6787e+08	1.88277e+08	1.29257e+08	1.25667e+08	1.27462e+08	1.83902e+08	1.23087e+08
High	Master Protein	A6NHL2	Tubulin alpha chain-like 3 OS=Homo sapiens OX=9606 GN=TUBAL3 PE=1 SV=2	12	8	123	1	49.9	TUBAL3			#DIV/0!	1.97189e+06	1.44032e+06	1.7061e+06	1.43583e+06	1.63471e+06	1.53527e+06	#DIV/0!	#DIV/0!
High	Master Protein	Q7Z3U7	Protein MON2 homolog OS=Homo sapiens OX=9606 GN=MON2 PE=1 SV=3	23	39	123	39	190.2	MON2	1.47156e+06	838322	1.15494e+06	1.81312e+08	1.55476e+08	1.68394e+08	1.18131e+08	1.16288e+08	1.1721e+08	1.67239e+08	1.16055e+08
High	Master Protein	P30153	Serine/threonine-protein phosphatase 2A 65 kDa regulatory subunit A alpha isoform OS=Homo sapiens OX=9606 GN=PPP2R1A PE=1 SV=4	47	24	121	18	65.3	PPP2R1A	1.0823e+07	6.73451e+06	8.77877e+06	3.02186e+08	2.69782e+08	2.85984e+08	2.6845e+08	2.97964e+08	2.83207e+08	2.77205e+08	2.74428e+08
High	Master Protein	Q96P70	Importin-9 OS=Homo sapiens OX=9606 GN=IPO9 PE=1 SV=3	38	29	121	29	115.9	IPO9	1.03148e+06	1.23851e+06	1.135e+06	2.97964e+08	2.48033e+08	2.72999e+08	2.02673e+08	2.11888e+08	2.07281e+08	2.71864e+08	2.06146e+08
High	Master Protein	P28288	ATP-binding cassette sub-family D member 3 OS=Homo sapiens OX=9606 GN=ABCD3 PE=1 SV=1	47	31	119	31	75.4	ABCD3	6.81288e+06	5.52059e+06	6.16674e+06	2.08471e+08	1.68429e+08	1.8845e+08	1.67093e+08	1.85079e+08	1.76086e+08	1.82283e+08	1.69919e+08
High	Master Protein	P78371	T-complex protein 1 subunit beta OS=Homo sapiens OX=9606 GN=CCT2 PE=1 SV=4	65	26	119	26	57.5	CCT2	2.33213e+07	1.56308e+07	1.9476e+07	1.14979e+08	1.0174e+08	1.0836e+08	8.28163e+07	9.69767e+07	8.98965e+07	8.88835e+07	7.04204e+07
High	Master Protein	P50402	Emerin OS=Homo sapiens OX=9606 GN=EMD PE=1 SV=1	65	17	118	17	29	EMD	2.72431e+07	1.72665e+07	2.22548e+07	8.09801e+08	564439621	6.87121e+08	4.96934e+08	6.17249e+08	5.57092e+08	6.64866e+08	5.34837e+08
High	Master Protein	P11940	Polyadenylate-binding protein 1 OS=Homo sapiens OX=9606 GN=PABPC1 PE=1 SV=2	41	24	112	14	70.6	PABPC1	6.62084e+07	4.53486e+07	5.57785e+07	1.90841e+08	1.9016e+08	1.90501e+08	1.6281e+08	1.84202e+08	1.73506e+08	1.34722e+08	1.17727e+08
High	Master Protein	Q9Y230	RuvB-like 2 OS=Homo sapiens OX=9606 GN=RUVBL2 PE=1 SV=3	55	25	111	25	51.1	RUVBL2	3.30791e+07	2.35393e+07	2.83092e+07	1.56724e+08	1.49341e+08	1.53033e+08	1.26115e+08	1.49806e+08	1.3796e+08	1.24723e+08	1.09651e+08
High	Master Protein	Q9Y4R8	Telomere length regulation protein TEL2 homolog OS=Homo sapiens OX=9606 GN=TELO2 PE=1 SV=2	51	33	111	33	91.7	TELO2	1.53005e+06	3.54718e+06	2.53861e+06	1.85221e+08	1.50551e+08	1.67886e+08	1.04484e+08	1.06811e+08	1.05647e+08	1.65348e+08	1.03109e+08
High	Master Protein	O75369	Filamin-B OS=Homo sapiens OX=9606 GN=FLNB PE=1 SV=2	20	37	111	31	278	FLNB	3.81926e+07	2.72915e+07	3.2742e+07	6.00489e+07	4.56837e+07	5.28663e+07	2.53054e+07	2.01628e+07	2.27341e+07	2.01242e+07	-1.00079e+07
High	Master Protein	P17844	Probable ATP-dependent RNA helicase DDX5 OS=Homo sapiens OX=9606 GN=DDX5 PE=1 SV=1	46	27	111	20	69.1	DDX5	51236300	3.27909e+07	4.20136e+07	2.09887e+08	2.25444e+08	2.17666e+08	1.81442e+08	2.05992e+08	1.93717e+08	1.75652e+08	1.51703e+08
High	Master Protein	Q9UM54	Unconventional myosin-VI OS=Homo sapiens OX=9606 GN=MYO6 PE=1 SV=4	32	35	110	35	149.6	MYO6	2.54824e+07	1.64599e+07	2.09711e+07	1.19803e+08	7.72174e+07	9.85101e+07	6.10911e+07	7.36312e+07	6.73612e+07	7.7539e+07	4.639e+07
High	Master Protein	Q8TEX9	Importin-4 OS=Homo sapiens OX=9606 GN=IPO4 PE=1 SV=2	45	33	110	33	118.6	IPO4	1.74805e+06	2.55046e+06	2.14925e+06	1.85167e+08	1.70022e+08	1.77595e+08	1.68126e+08	1.48769e+08	1.58448e+08	1.75446e+08	1.56298e+08
High	Master Protein	P04844	Dolichyl-diphosphooligosaccharide--protein glycosyltransferase subunit 2 OS=Homo sapiens OX=9606 GN=RPN2 PE=1 SV=3	59	29	109	29	69.2	RPN2	4.34963e+06	2.77681e+06	3.56322e+06	4.40731e+08	3.329e+08	3.86816e+08	2.79641e+08	3.3417e+08	3.06905e+08	3.83252e+08	3.03342e+08
High	Master Protein	P55060	Exportin-2 OS=Homo sapiens OX=9606 GN=CSE1L PE=1 SV=3	46	34	109	34	110.3	CSE1L	7.84447e+06	5.01967e+06	6.43207e+06	2.31961e+08	1.76187e+08	2.04074e+08	1.64235e+08	1.6022e+08	1.62228e+08	1.97642e+08	1.55796e+08
High	Master Protein	P19338	Nucleolin OS=Homo sapiens OX=9606 GN=NCL PE=1 SV=3	33	27	109	27	76.6	NCL	4.24524e+07	3.57423e+07	3.90973e+07	2.76889e+08	1.97064e+08	2.36976e+08	1.75929e+08	1.99966e+08	1.87947e+08	1.97879e+08	1.4885e+08
High	Master Protein	Q9BQG0	Myb-binding protein 1A OS=Homo sapiens OX=9606 GN=MYBBP1A PE=1 SV=2	33	38	109	38	148.8	MYBBP1A	3.37545e+06	3.06175e+06	3.2186e+06	1.28044e+08	93904832	1.10974e+08	6.70386e+07	6.41261e+07	6.55824e+07	1.07756e+08	6.23638e+07
High	Master Protein	Q6P2Q9	Pre-mRNA-processing-splicing factor 8 OS=Homo sapiens OX=9606 GN=PRPF8 PE=1 SV=2	20	37	107	37	273.4	PRPF8	4.46046e+06	6.41467e+06	5.43756e+06	1.29983e+08	9.21032e+07	1.11043e+08	7.07388e+07	7.138e+07	7.10594e+07	1.05606e+08	6.56218e+07
High	Master Protein	Q9UHI6	Probable ATP-dependent RNA helicase DDX20 OS=Homo sapiens OX=9606 GN=DDX20 PE=1 SV=2	43	26	106	26	92.2	DDX20	7.50069e+06	5.6025e+06	6.5516e+06	3.25954e+08	2.3416e+08	2.80057e+08	1.82349e+08	2.06807e+08	1.94578e+08	2.73506e+08	1.88026e+08
High	Master Protein	O00264	Membrane-associated progesterone receptor component 1 OS=Homo sapiens OX=9606 GN=PGRMC1 PE=1 SV=3	69	16	106	15	21.7	PGRMC1	5.67655e+06	3.61794e+06	4.64725e+06	8.80503e+08	5.81715e+08	7.31109e+08	6.62809e+08	869255995	7.66032e+08	7.26462e+08	7.61385e+08
High	Master Protein	O00571	ATP-dependent RNA helicase DDX3X OS=Homo sapiens OX=9606 GN=DDX3X PE=1 SV=3	41	27	104	26	73.2	DDX3X	3.27684e+07	2.859e+07	3.06792e+07	1.46316e+08	1.12678e+08	1.29497e+08	9.92793e+07	1.22209e+08	1.10744e+08	9.88178e+07	8.00648e+07
High	Master Protein	P53618	Coatomer subunit beta OS=Homo sapiens OX=9606 GN=COPB1 PE=1 SV=3	37	27	103	27	107.1	COPB1	1.46468e+07	1.10382e+07	1.28425e+07	1.87516e+08	1.31359e+08	1.59437e+08	1.17431e+08	1.33557e+08	1.25494e+08	1.46595e+08	1.12652e+08
High	Master Protein	P57678	Gem-associated protein 4 OS=Homo sapiens OX=9606 GN=GEMIN4 PE=1 SV=2	34	30	101	30	120	GEMIN4	6.76191e+07	1.05575e+08	8.65969e+07	2.52362e+08	2.073e+08	2.29831e+08	1.45124e+08	1.81393e+08	1.63258e+08	1.43234e+08	7.66616e+07
High	Master Protein	P41252	Isoleucine--tRNA ligase, cytoplasmic OS=Homo sapiens OX=9606 GN=IARS1 PE=1 SV=2	26	27	101	27	144.4	IARS1	4.49e+07	3.79559e+07	4.14279e+07	1.27664e+08	9.34321e+07	1.10548e+08	7.69824e+07	8.97532e+07	8.33678e+07	6.91201e+07	4.19399e+07
High	Master Protein	O75688	Protein phosphatase 1B OS=Homo sapiens OX=9606 GN=PPM1B PE=1 SV=1	57	23	101	23	52.6	PPM1B	1.43762e+06	317466	877545	2.69562e+08	2.32398e+08	2.5098e+08	1.4681e+08	1.88026e+08	1.67418e+08	2.50102e+08	1.66541e+08
High	Master Protein	P08195	Amino acid transporter heavy chain SLC3A2 OS=Homo sapiens OX=9606 GN=SLC3A2 PE=1 SV=3	39	22	100	22	68	SLC3A2	1.52898e+07	1.12299e+07	1.32599e+07	6.43434e+08	4.50966e+08	5.472e+08	4.55466e+08	4.6632e+08	4.60893e+08	5.3394e+08	4.47633e+08
High	Master Protein	P33993	DNA replication licensing factor MCM7 OS=Homo sapiens OX=9606 GN=MCM7 PE=1 SV=4	46	25	100	25	81.3	MCM7	3.17786e+07	2.28536e+07	2.73161e+07	1.47994e+08	1.24456e+08	1.36225e+08	1.09553e+08	1.31218e+08	1.20386e+08	1.08909e+08	9.30695e+07
High	Master Protein	P46977	Dolichyl-diphosphooligosaccharide--protein glycosyltransferase subunit STT3A OS=Homo sapiens OX=9606 GN=STT3A PE=1 SV=2	29	21	99	21	80.5	STT3A	2.92524e+06	3.5697e+06	3.24747e+06	3.67571e+08	2.44371e+08	3.05971e+08	2.60244e+08	2.8139e+08	2.70817e+08	3.02723e+08	2.67569e+08
High	Master Protein	Q9Y4W6	AFG3-like protein 2 OS=Homo sapiens OX=9606 GN=AFG3L2 PE=1 SV=2	35	29	99	28	88.5	AFG3L2	3.17499e+06	3.65558e+06	3.41529e+06	1.69193e+08	1.29233e+08	1.49213e+08	1.06722e+08	1.12459e+08	1.0959e+08	1.45798e+08	1.06175e+08
High	Master Protein	Q92841	Probable ATP-dependent RNA helicase DDX17 OS=Homo sapiens OX=9606 GN=DDX17 PE=1 SV=2	35	22	99	15	80.2	DDX17	7.07787e+06	5.91474e+06	6.4963e+06	5.24878e+07	4.98519e+07	5.11698e+07	4.41136e+07	5.12908e+07	4.77022e+07	4.46735e+07	4.12059e+07
High	Master Protein	P36542	ATP synthase subunit gamma, mitochondrial OS=Homo sapiens OX=9606 GN=ATP5F1C PE=1 SV=1	48	16	98	16	33	ATP5F1C	2.01151e+07	1.73496e+07	1.87324e+07	3.58433e+08	2.53302e+08	3.05867e+08	2.05103e+08	311169869	2.58137e+08	2.87135e+08	2.39404e+08
High	Master Protein	P49368	T-complex protein 1 subunit gamma OS=Homo sapiens OX=9606 GN=CCT3 PE=1 SV=4	54	26	97	26	60.5	CCT3	1.77639e+07	1.37445e+07	1.57542e+07	1.11383e+08	1.14419e+08	1.12901e+08	9.1381e+07	9.75864e+07	9.44837e+07	9.71467e+07	7.87295e+07
High	Master Protein	P14868	Aspartate--tRNA ligase, cytoplasmic OS=Homo sapiens OX=9606 GN=DARS1 PE=1 SV=2	51	22	95	22	57.1	DARS1	5.47646e+07	3.42204e+07	4.44925e+07	1.17043e+08	8.64e+07	1.01721e+08	7.49074e+07	8.72672e+07	8.10873e+07	5.72289e+07	3.65948e+07
High	Master Protein	O75643	U5 small nuclear ribonucleoprotein 200 kDa helicase OS=Homo sapiens OX=9606 GN=SNRNP200 PE=1 SV=2	22	34	95	34	244.4	SNRNP200	6.04663e+06	4.24592e+06	5.14628e+06	1.03978e+08	6.73558e+07	8.56667e+07	4.99765e+07	5.79095e+07	5.3943e+07	8.05204e+07	4.87967e+07
High	Master Protein	Q14257	Reticulocalbin-2 OS=Homo sapiens OX=9606 GN=RCN2 PE=1 SV=1	62	18	94	18	36.9	RCN2	4.86894e+06	3.09932e+06	3.98413e+06	5.26012e+08	2.67083e+08	3.96547e+08	2.61379e+08	3.7102e+08	3.16199e+08	3.92563e+08	3.12215e+08
High	Master Protein	Q16643	Drebrin OS=Homo sapiens OX=9606 GN=DBN1 PE=1 SV=4	43	24	94	24	71.4	DBN1	4.6534e+07	2.988e+07	3.8207e+07	2.04016e+08	1.39507e+08	1.71762e+08	8.92279e+07	9.38613e+07	9.15446e+07	1.33555e+08	5.33375e+07
High	Master Protein	Q96T76	MMS19 nucleotide excision repair protein homolog OS=Homo sapiens OX=9606 GN=MMS19 PE=1 SV=2	47	31	93	31	113.2	MMS19	751661	1.15124e+06	951451	1.52242e+08	1.22536e+08	1.37389e+08	1.13071e+08	1.19757e+08	1.16414e+08	1.36438e+08	1.15463e+08
High	Master Protein	O14744	Protein arginine N-methyltransferase 5 OS=Homo sapiens OX=9606 GN=PRMT5 PE=1 SV=4	47	25	93	25	72.6	PRMT5	4.38418e+06	2.99368e+06	3.68893e+06	4.78106e+08	4.63702e+08	4.70904e+08	3.18138e+08	3.77437e+08	3.47787e+08	4.67215e+08	3.44098e+08
High	Master Protein	Q14126	Desmoglein-2 OS=Homo sapiens OX=9606 GN=DSG2 PE=1 SV=2	30	23	93	23	122.2	DSG2	2.12226e+07	1.61072e+07	1.86649e+07	136251117	1.085e+08	1.22376e+08	8.67179e+07	9.22925e+07	8.95052e+07	1.03711e+08	7.08403e+07
High	Master Protein	P15924	Desmoplakin OS=Homo sapiens OX=9606 GN=DSP PE=1 SV=3	18	38	92	38	331.6	DSP	2.13316e+07	3.28031e+07	2.70674e+07	6.38254e+07	5.38235e+07	5.88244e+07	4.89262e+07	5.16132e+07	5.02697e+07	3.1757e+07	2.32023e+07
High	Master Protein	Q16531	DNA damage-binding protein 1 OS=Homo sapiens OX=9606 GN=DDB1 PE=1 SV=1	31	28	91	28	126.9	DDB1	5.71924e+06	5.32959e+06	5.52442e+06	1.06685e+08	8.54259e+07	9.60553e+07	8.12156e+07	9.13235e+07	8.62695e+07	9.05309e+07	8.07451e+07
High	Master Protein	O95347	Structural maintenance of chromosomes protein 2 OS=Homo sapiens OX=9606 GN=SMC2 PE=1 SV=2	35	33	91	33	135.6	SMC2	2.97262e+06	2.63733e+06	2.80497e+06	1.16267e+08	73073311	9.46702e+07	7.46167e+07	8.30075e+07	7.88121e+07	9.18652e+07	7.60071e+07
High	Master Protein	O94822	E3 ubiquitin-protein ligase listerin OS=Homo sapiens OX=9606 GN=LTN1 PE=1 SV=6	22	30	90	30	200.4	LTN1	323496	205837	264666	1.07321e+08	8.79508e+07	9.76361e+07	6.68665e+07	5.70771e+07	6.19718e+07	9.73715e+07	6.17071e+07
High	Master Protein	P48643	T-complex protein 1 subunit epsilon OS=Homo sapiens OX=9606 GN=CCT5 PE=1 SV=1	55	23	89	23	59.6	CCT5	8.44747e+06	9.28952e+06	8.86849e+06	1.06053e+08	9.87196e+07	1.02387e+08	7.70322e+07	8.46765e+07	8.08543e+07	9.3518e+07	7.19858e+07
High	Master Protein	P50990	T-complex protein 1 subunit theta OS=Homo sapiens OX=9606 GN=CCT8 PE=1 SV=4	55	27	88	27	59.6	CCT8	2.22834e+07	1.21978e+07	1.72406e+07	127486578	1.04091e+08	1.15789e+08	7.61892e+07	9.6564e+07	8.63766e+07	9.85482e+07	6.9136e+07
High	Master Protein	P55795	Heterogeneous nuclear ribonucleoprotein H2 OS=Homo sapiens OX=9606 GN=HNRNPH2 PE=1 SV=1	40	13	88	7	49.2	HNRNPH2	3.10643e+06	2.4439e+06	2.77517e+06	3.64262e+07	3.14192e+07	3.39227e+07	2.63253e+07	3.61474e+07	3.12364e+07	3.11476e+07	2.84612e+07
High	Master Protein	Q14697	Neutral alpha-glucosidase AB OS=Homo sapiens OX=9606 GN=GANAB PE=1 SV=3	38	26	87	26	106.8	GANAB	4.22409e+06	5.21794e+06	4.72101e+06	1.54924e+08	1.10924e+08	1.32924e+08	1.00924e+08	1.15657e+08	1.08291e+08	1.28203e+08	1.0357e+08
High	Master Protein	P62249	Small ribosomal subunit protein uS9 OS=Homo sapiens OX=9606 GN=RPS16 PE=1 SV=2	68	13	87	13	16.4	RPS16	6.66984e+07	6.61193e+07	6.64088e+07	5.34027e+08	4.50829e+08	4.92428e+08	3.44462e+08	3.8963e+08	3.67046e+08	4.26019e+08	3.00637e+08
High	Master Protein	P23634	Plasma membrane calcium-transporting ATPase 4 OS=Homo sapiens OX=9606 GN=ATP2B4 PE=1 SV=2	23	24	86	8	137.8	ATP2B4		260490	260490	1.91907e+07	1.51205e+07	1.71556e+07	1.43762e+07	1.43161e+07	1.43462e+07	1.68951e+07	1.40857e+07
High	Master Protein	Q13200	26S proteasome non-ATPase regulatory subunit 2 OS=Homo sapiens OX=9606 GN=PSMD2 PE=1 SV=3	34	24	85	24	100.1	PSMD2	6.10577e+06	4.46659e+06	5.28618e+06	1.13277e+08	8.13493e+07	9.73134e+07	8.32802e+07	8.98298e+07	8.6555e+07	9.20272e+07	8.12688e+07
High	Master Protein	Q9NTJ3	Structural maintenance of chromosomes protein 4 OS=Homo sapiens OX=9606 GN=SMC4 PE=1 SV=2	33	35	85	35	147.1	SMC4	3.87768e+06	3.42677e+06	3.65222e+06	1.10832e+08	7.21147e+07	9.14735e+07	6.31316e+07	6.88266e+07	6.59791e+07	8.78213e+07	6.23269e+07
High	Master Protein	P52597	Heterogeneous nuclear ribonucleoprotein F OS=Homo sapiens OX=9606 GN=HNRNPF PE=1 SV=3	49	13	85	11	45.6	HNRNPF	1.8762e+06	2.1603e+06	2.01825e+06	1.14234e+08	9.92796e+07	1.06757e+08	7.65556e+07	9.57948e+07	8.61752e+07	1.04739e+08	8.4157e+07
High	Master Protein	Q15365	Poly(rC)-binding protein 1 OS=Homo sapiens OX=9606 GN=PCBP1 PE=1 SV=2	76	16	83	12	37.5	PCBP1	6.51944e+07	3.56537e+07	5.04241e+07	1.50295e+08	1.67171e+08	1.58733e+08	1.42713e+08	1.48429e+08	1.45571e+08	1.08309e+08	9.51469e+07
High	Master Protein	Q3ZCQ8	Mitochondrial import inner membrane translocase subunit TIM50 OS=Homo sapiens OX=9606 GN=TIMM50 PE=1 SV=2	37	17	83	17	39.6	TIMM50	1.6331e+07	3.21178e+06	9.77139e+06	2.61331e+08	2.04963e+08	2.33147e+08	1.34073e+08	1.67302e+08	1.50688e+08	2.23376e+08	1.40916e+08
High	Master Protein	A5YKK6	CCR4-NOT transcription complex subunit 1 OS=Homo sapiens OX=9606 GN=CNOT1 PE=1 SV=2	15	27	82	27	266.8	CNOT1	1.37362e+07	1.21092e+07	1.29227e+07	5.71035e+07	4.04411e+07	4.87723e+07	3.3712e+07	3.75069e+07	3.56094e+07	3.58496e+07	2.26867e+07
High	Master Protein	Q99615	DnaJ homolog subfamily C member 7 OS=Homo sapiens OX=9606 GN=DNAJC7 PE=1 SV=2	48	23	81	23	56.4	DNAJC7	1.28757e+07	1.46205e+07	1.37481e+07	1.34268e+08	1.31108e+08	1.32688e+08	1.07099e+08	1.20575e+08	1.13837e+08	1.1894e+08	1.00089e+08
High	Master Protein	Q9UNF1	Melanoma-associated antigen D2 OS=Homo sapiens OX=9606 GN=MAGED2 PE=1 SV=2	36	22	81	19	64.9	MAGED2	3.03581e+07	2.02602e+07	2.53091e+07	1.28864e+08	1.00851e+08	1.14857e+08	8.91857e+07	1.12178e+08	1.00682e+08	8.9548e+07	7.53727e+07
High	Master Protein	Q13813	Spectrin alpha chain, non-erythrocytic 1 OS=Homo sapiens OX=9606 GN=SPTAN1 PE=1 SV=3	17	33	81	33	284.4	SPTAN1	8.93353e+06	9.3863e+06	9.15991e+06	5.04438e+07	3.09797e+07	4.07118e+07	2.03241e+07	2.11491e+07	2.07366e+07	3.15519e+07	1.15767e+07
High	Master Protein	Q9Y265	RuvB-like 1 OS=Homo sapiens OX=9606 GN=RUVBL1 PE=1 SV=1	43	16	81	16	50.2	RUVBL1	3.2612e+07	2.05591e+07	2.65855e+07	1.52579e+08	1.45543e+08	1.49061e+08	1.06397e+08	1.20865e+08	1.13631e+08	1.22475e+08	8.70455e+07
High	Master Protein	Q9Y5V3	Melanoma-associated antigen D1 OS=Homo sapiens OX=9606 GN=MAGED1 PE=1 SV=3	38	21	81	17	86.1	MAGED1	1.35818e+06	1.32675e+06	1.34246e+06	1.49018e+08	1.11022e+08	1.3002e+08	9.52635e+07	1.07038e+08	1.01151e+08	1.28678e+08	9.98085e+07
High	Master Protein	Q8TEM1	Nuclear pore membrane glycoprotein 210 OS=Homo sapiens OX=9606 GN=NUP210 PE=1 SV=3	21	28	81	28	205	NUP210	3.26669e+06	4.64297e+06	3.95483e+06	1.27435e+08	1.02869e+08	1.15152e+08	78251363	6.70819e+07	7.26666e+07	1.11198e+08	6.87118e+07
High	Master Protein	P14618	Pyruvate kinase PKM OS=Homo sapiens OX=9606 GN=PKM PE=1 SV=4	60	23	81	23	57.9	PKM	6.19616e+07	4.13707e+07	5.16662e+07	1.14697e+08	1.15097e+08	1.14897e+08	7.73783e+07	9.13892e+07	8.43837e+07	6.32309e+07	3.27176e+07
High	Master Protein	O95881	Thioredoxin domain-containing protein 12 OS=Homo sapiens OX=9606 GN=TXNDC12 PE=1 SV=1	60	8	80	8	19.2	TXNDC12	3.04154e+08	1.80887e+08	2.4252e+08	3.69981e+08	2.15648e+08	2.92814e+08	2.19883e+08	2.12019e+08	2.15951e+08	5.02939e+07	-2.65694e+07
High	Master Protein	P62258	14-3-3 protein epsilon OS=Homo sapiens OX=9606 GN=YWHAE PE=1 SV=1	67	18	80	16	29.2	YWHAE	4.24766e+07	2.59889e+07	3.42328e+07	1.31189e+08	9.86161e+07	1.14902e+08	8.20208e+07	1.19165e+08	1.00593e+08	8.06696e+07	6.63601e+07
High	Master Protein	P05388	Large ribosomal subunit protein uL10 OS=Homo sapiens OX=9606 GN=RPLP0 PE=1 SV=1	52	14	79	14	34.3	RPLP0	3.82294e+07	2.56625e+07	3.19459e+07	1.82879e+08	146678426	1.64779e+08	1.06168e+08	1.352e+08	1.20684e+08	1.32833e+08	8.87381e+07
High	Master Protein	P52789	Hexokinase-2 OS=Homo sapiens OX=9606 GN=HK2 PE=1 SV=2	29	26	79	22	102.3	HK2	4.76939e+06	3.68653e+06	4.22796e+06	60201272	4.80145e+07	5.41079e+07	4.58934e+07	5.85217e+07	5.22076e+07	4.98799e+07	4.79796e+07
High	Master Protein	O60884	DnaJ homolog subfamily A member 2 OS=Homo sapiens OX=9606 GN=DNAJA2 PE=1 SV=1	54	19	79	19	45.7	DNAJA2	8.17524e+06	4.49876e+06	6.337e+06	4.43976e+08	3.84432e+08	4.14204e+08	3.1581e+08	4.0832e+08	3.62065e+08	4.07867e+08	3.55728e+08
High	Master Protein	Q99623	Prohibitin-2 OS=Homo sapiens OX=9606 GN=PHB2 PE=1 SV=2	56	15	78	15	33.3	PHB2	1.49284e+07	7207515	1.1068e+07	8.90109e+07	6.32624e+07	7.61367e+07	4.53454e+07	6.36322e+07	5.44888e+07	6.50687e+07	4.34208e+07
High	Master Protein	Q13310	Polyadenylate-binding protein 4 OS=Homo sapiens OX=9606 GN=PABPC4 PE=1 SV=1	38	20	77	10	70.7	PABPC4	7.87089e+06	6.3907e+06	7.1308e+06	2.91911e+07	2.58844e+07	2.75377e+07	2.36061e+07	2.59182e+07	2.47621e+07	2.04069e+07	1.76314e+07
High	Master Protein	P26599	Polypyrimidine tract-binding protein 1 OS=Homo sapiens OX=9606 GN=PTBP1 PE=1 SV=2	40	16	77	16	59.6	PTBP1	3.34429e+07	2.23817e+07	2.79123e+07	1.2695e+08	1.04262e+08	1.15606e+08	9.71458e+07	105330251	1.01238e+08	8.76934e+07	7.33257e+07
High	Master Protein	O95373	Importin-7 OS=Homo sapiens OX=9606 GN=IPO7 PE=1 SV=1	30	25	77	25	119.4	IPO7	1.1858e+06	1.53601e+06	1.36091e+06	1.14453e+08	7.3183e+07	9.38183e+07	7.3386e+07	8.22016e+07	7.77938e+07	9.24574e+07	7.64329e+07
High	Master Protein	Q7Z406	Myosin-14 OS=Homo sapiens OX=9606 GN=MYH14 PE=1 SV=2	11	21	77	11	227.7	MYH14	4.60193e+06	4.01417e+06	4.30805e+06	1.26319e+07	8.95773e+06	1.07948e+07	5.48598e+06	3141730	4.31386e+06	6.48675e+06	5808.59
High	Master Protein	Q5JPE7	BOS complex subunit NOMO2 OS=Homo sapiens OX=9606 GN=NOMO2 PE=1 SV=1	35	28	76	2	139.4	NOMO2	2.19923e+06	1.56736e+06	1.88329e+06	7.8301e+07	5.31975e+07	6.57492e+07	5.49443e+07	6.04608e+07	5.77025e+07	6.3866e+07	5.58192e+07
High	Master Protein	Q9UHB6	LIM domain and actin-binding protein 1 OS=Homo sapiens OX=9606 GN=LIMA1 PE=1 SV=1	39	24	76	24	85.2	LIMA1	1.30571e+07	1.05802e+07	1.18187e+07	5.1181e+07	4.15047e+07	4.63428e+07	2.33569e+07	2.8481e+07	2.5919e+07	3.45242e+07	1.41003e+07
High	Master Protein	Q9NR30	Nucleolar RNA helicase 2 OS=Homo sapiens OX=9606 GN=DDX21 PE=1 SV=5	28	19	75	17	87.3	DDX21	1.63616e+07	1.12727e+07	1.38171e+07	1.00381e+08	7.18471e+07	8.61139e+07	5.9483e+07	74703088	6.7093e+07	7.22968e+07	5.32759e+07
High	Master Protein	A0A075B6R9	Probable non-functional immunoglobulin kappa variable 2D-24 OS=Homo sapiens OX=9606 GN=IGKV2D-24 PE=1 SV=1	13	3	75	2	13.1	IGKV2D-24	1.51918e+09	1152716587	1.33595e+09	8.89409e+08	1.04113e+09	9.65272e+08	7.30453e+08	7.21689e+08	7.26071e+08	-3.70678e+08	-6.09879e+08
High	Master Protein	P47897	Glutamine--tRNA ligase OS=Homo sapiens OX=9606 GN=QARS1 PE=1 SV=1	34	23	75	23	87.7	QARS1	3.0796e+07	2.27933e+07	2.67947e+07	75496254	5.61695e+07	6.58329e+07	5.66022e+07	7.34538e+07	6.5028e+07	3.90382e+07	3.82333e+07
High	Master Protein	Q9UBB4	Ataxin-10 OS=Homo sapiens OX=9606 GN=ATXN10 PE=1 SV=1	49	20	75	20	53.5	ATXN10	778684	1.25981e+06	1.01925e+06	1.27002e+08	1.11274e+08	1.19138e+08	1.1214e+08	1.12801e+08	1.1247e+08	1.18119e+08	1.11451e+08
High	Master Protein	Q8WVX9	Fatty acyl-CoA reductase 1 OS=Homo sapiens OX=9606 GN=FAR1 PE=1 SV=1	47	20	75	20	59.3	FAR1	6.58066e+06	4.83946e+06	5.71006e+06	191660378	1.55867e+08	1.73764e+08	1.2374e+08	1.43275e+08	1.33507e+08	1.68054e+08	1.27797e+08
High	Master Protein	P39656	Dolichyl-diphosphooligosaccharide--protein glycosyltransferase 48 kDa subunit OS=Homo sapiens OX=9606 GN=DDOST PE=1 SV=4	60	17	74	17	50.8	DDOST	1.01126e+07	7.60985e+06	8.86125e+06	4.06019e+08	3.04572e+08	3.55296e+08	2.8399e+08	3.46023e+08	3.15007e+08	3.46434e+08	3.06145e+08
High	Master Protein	Q9HAV4	Exportin-5 OS=Homo sapiens OX=9606 GN=XPO5 PE=1 SV=1	28	25	74	25	136.2	XPO5	2.37849e+06	2.39471e+06	2.3866e+06	9.07797e+07	8.6693e+07	8.87363e+07	7.45833e+07	6.90374e+07	7.18103e+07	8.63497e+07	6.94238e+07
High	Master Protein	P42167	Lamina-associated polypeptide 2, isoforms beta/gamma OS=Homo sapiens OX=9606 GN=TMPO PE=1 SV=2	57	18	74	8	50.6	TMPO	1.09611e+07	8.14899e+06	9.55507e+06	1.67002e+08	1.41229e+08	1.54116e+08	110438285	1.37383e+08	1.2391e+08	1.44561e+08	1.14355e+08
High	Master Protein	Q15155	BOS complex subunit NOMO1 OS=Homo sapiens OX=9606 GN=NOMO1 PE=1 SV=5	33	27	74	1	134.2	NOMO1			#DIV/0!	1.23432e+06	755272	994796	624185	664192	644189	#DIV/0!	#DIV/0!
High	Master Protein	P60660	Myosin light polypeptide 6 OS=Homo sapiens OX=9606 GN=MYL6 PE=1 SV=2	63	10	74	8	16.9	MYL6	2.66623e+08	1.20871e+08	1.93747e+08	5.66331e+08	3.4742e+08	4.56875e+08	1.63177e+08	1.64556e+08	1.63867e+08	2.63128e+08	-2.98808e+07
High	Master Protein	O43795	Unconventional myosin-Ib OS=Homo sapiens OX=9606 GN=MYO1B PE=1 SV=3	23	20	74	20	131.9	MYO1B	1.43918e+07	1.05139e+07	1.24528e+07	8.2083e+07	4.29306e+07	6.25068e+07	3.52829e+07	4.37148e+07	3.94989e+07	5.0054e+07	2.7046e+07
High	Master Protein	Q15029	116 kDa U5 small nuclear ribonucleoprotein component OS=Homo sapiens OX=9606 GN=EFTUD2 PE=1 SV=1	36	24	74	23	109.4	EFTUD2	8.5265e+06	5.38098e+06	6.95374e+06	9.94224e+07	7.34025e+07	8.64125e+07	6.82646e+07	8.21199e+07	7.51923e+07	7.94587e+07	6.82385e+07
High	Master Protein	P54136	Arginine--tRNA ligase, cytoplasmic OS=Homo sapiens OX=9606 GN=RARS1 PE=1 SV=2	32	18	72	18	75.3	RARS1	1.58737e+07	1.38897e+07	1.48817e+07	4.77156e+07	3.9366e+07	4.35408e+07	3.23305e+07	4.10684e+07	3.66994e+07	2.86591e+07	2.18177e+07
High	Master Protein	O43242	26S proteasome non-ATPase regulatory subunit 3 OS=Homo sapiens OX=9606 GN=PSMD3 PE=1 SV=2	40	17	72	17	60.9	PSMD3	2.16661e+07	1.84314e+07	2.00488e+07	9.18466e+07	6.21811e+07	7.70139e+07	5.80319e+07	7.87832e+07	6.84076e+07	5.69651e+07	4.83588e+07
High	Master Protein	Q92598	Heat shock protein 105 kDa OS=Homo sapiens OX=9606 GN=HSPH1 PE=1 SV=1	34	25	72	23	96.8	HSPH1	2.30417e+07	1.37413e+07	1.83915e+07	5.32058e+07	4.69423e+07	5.0074e+07	4.29435e+07	4.44148e+07	4.36791e+07	3.16825e+07	2.52876e+07
High	Master Protein	P56192	Methionine--tRNA ligase, cytoplasmic OS=Homo sapiens OX=9606 GN=MARS1 PE=1 SV=2	34	23	71	23	101.1	MARS1	1.85936e+07	9.59127e+06	1.40924e+07	1.25039e+08	1.01882e+08	1.13461e+08	9.33102e+07	1.00927e+08	9.71189e+07	9.93681e+07	8.30264e+07
High	Master Protein	Q03252	Lamin-B2 OS=Homo sapiens OX=9606 GN=LMNB2 PE=1 SV=4	38	24	71	19	69.9	LMNB2	3.34103e+06	1.74399e+06	2.54251e+06	5.477e+07	5.19067e+07	5.33383e+07	3.29063e+07	4.31677e+07	3.8037e+07	5.07958e+07	3.54945e+07
High	Master Protein	O15397	Importin-8 OS=Homo sapiens OX=9606 GN=IPO8 PE=1 SV=2	27	24	71	24	119.9	IPO8	723807	604278	664042	1.30598e+08	9.95176e+07	1.15058e+08	6.8332e+07	7.71469e+07	7.27394e+07	1.14394e+08	7.20754e+07
High	Master Protein	O00159	Unconventional myosin-Ic OS=Homo sapiens OX=9606 GN=MYO1C PE=1 SV=4	31	29	70	29	121.6	MYO1C	9.35524e+06	1.20091e+07	1.06822e+07	8.74895e+07	5.27944e+07	7.01419e+07	3.96559e+07	45368202	4.2512e+07	5.94598e+07	3.18299e+07
High	Master Protein	Q8WUM0	Nuclear pore complex protein Nup133 OS=Homo sapiens OX=9606 GN=NUP133 PE=1 SV=2	32	27	70	27	128.9	NUP133	1.15478e+06	1.6575e+06	1.40614e+06	8.2784e+07	5.05671e+07	6.66755e+07	6.60512e+07	7.22552e+07	6.91532e+07	6.52694e+07	6.77471e+07
High	Master Protein	Q14498	RNA-binding protein 39 OS=Homo sapiens OX=9606 GN=RBM39 PE=1 SV=2	31	14	70	14	59.3	RBM39	1.1775e+07	9.70364e+06	1.07393e+07	8.67478e+07	8.76632e+07	8.72055e+07	8.06878e+07	9.08169e+07	8.57524e+07	7.64662e+07	7.5013e+07
High	Master Protein	O15269	Serine palmitoyltransferase 1 OS=Homo sapiens OX=9606 GN=SPTLC1 PE=1 SV=1	34	15	70	15	52.7	SPTLC1	1.4448e+06	1.39246e+06	1.41863e+06	1.46774e+08	1.23577e+08	1.35176e+08	1.07213e+08	1.23625e+08	1.15419e+08	1.33757e+08	1.14e+08
High	Master Protein	Q4VCS5	Angiomotin OS=Homo sapiens OX=9606 GN=AMOT PE=1 SV=1	29	21	69	21	118	AMOT	3.32727e+07	2.33807e+07	2.83267e+07	6.54054e+07	5.24896e+07	5.89475e+07	2.16473e+07	1.32779e+07	1.74626e+07	3.06208e+07	-1.08641e+07
High	Master Protein	O75155	Cullin-associated NEDD8-dissociated protein 2 OS=Homo sapiens OX=9606 GN=CAND2 PE=1 SV=3	28	26	68	24	135.2	CAND2	630804	512476	571640	8.31637e+07	71046244	7.7105e+07	5.50189e+07	5.29526e+07	5.39857e+07	7.65333e+07	5.34141e+07
High	Master Protein	Q96PK6	RNA-binding protein 14 OS=Homo sapiens OX=9606 GN=RBM14 PE=1 SV=2	25	14	68	14	69.4	RBM14	2.42592e+07	1.94759e+07	2.18675e+07	8.3865e+07	6.28614e+07	7.33632e+07	6.30933e+07	6.71697e+07	6.51315e+07	5.14957e+07	4.3264e+07
High	Master Protein	P33992	DNA replication licensing factor MCM5 OS=Homo sapiens OX=9606 GN=MCM5 PE=1 SV=5	39	21	68	21	82.2	MCM5	2.86622e+07	1.9332e+07	2.39971e+07	8.62306e+07	7.9093e+07	8.26618e+07	7.61993e+07	7.52387e+07	7.5719e+07	5.86647e+07	5.1722e+07
High	Master Protein	Q15366	Poly(rC)-binding protein 2 OS=Homo sapiens OX=9606 GN=PCBP2 PE=1 SV=1	65	14	68	8	38.6	PCBP2	4.41978e+07	2.38934e+07	3.40456e+07	1.08496e+08	1.06871e+08	1.07683e+08	9.30381e+07	9.64114e+07	9.47248e+07	7.36377e+07	6.06792e+07
High	Master Protein	P22314	Ubiquitin-like modifier-activating enzyme 1 OS=Homo sapiens OX=9606 GN=UBA1 PE=1 SV=3	23	18	68	18	117.8	UBA1	2.15089e+07	1.44948e+07	1.80018e+07	3.80813e+07	3.31823e+07	3.56318e+07	2.31103e+07	2.51878e+07	2.41491e+07	1.763e+07	6.14728e+06
High	Master Protein	Q06830	Peroxiredoxin-1 OS=Homo sapiens OX=9606 GN=PRDX1 PE=1 SV=1	52	14	68	10	22.1	PRDX1	1.39706e+08	1.04925e+08	1.22315e+08	4.33217e+08	3.16748e+08	3.74983e+08	2.43753e+08	3.23012e+08	2.83382e+08	2.52668e+08	1.61067e+08
High	Master Protein	Q9NU22	Midasin OS=Homo sapiens OX=9606 GN=MDN1 PE=1 SV=2	6	31	68	31	632.4	MDN1	264456	491475	377966	4.77077e+07	3.76601e+07	4.26839e+07	2.4657e+07	2.56049e+07	2.5131e+07	4.23059e+07	2.4753e+07
High	Master Protein	Q01082	Spectrin beta chain, non-erythrocytic 1 OS=Homo sapiens OX=9606 GN=SPTBN1 PE=1 SV=2	11	22	68	21	274.4	SPTBN1	9.6916e+06	9.23556e+06	9.46358e+06	3.36668e+07	2.10728e+07	2.73698e+07	1.33217e+07	1.55181e+07	1.44199e+07	1.79062e+07	4.95635e+06
High	Master Protein	O00410	Importin-5 OS=Homo sapiens OX=9606 GN=IPO5 PE=1 SV=4	30	23	68	21	123.6	IPO5	8.84941e+06	4.88177e+06	6.86559e+06	7.9287e+07	6.55244e+07	7.24057e+07	5.97478e+07	6.62235e+07	6.29856e+07	6.55401e+07	5.612e+07
High	Master Protein	Q86VP6	Cullin-associated NEDD8-dissociated protein 1 OS=Homo sapiens OX=9606 GN=CAND1 PE=1 SV=2	24	22	67	20	136.3	CAND1	3.48626e+06	2.59817e+06	3.04222e+06	5.50781e+07	4.42436e+07	4.96608e+07	4.36097e+07	5.00378e+07	4.68237e+07	4.66186e+07	4.37815e+07
High	Master Protein	Q8N201	Integrator complex subunit 1 OS=Homo sapiens OX=9606 GN=INTS1 PE=1 SV=2	16	27	67	27	244.1	INTS1	937464	1.199e+06	1.06823e+06	5.18108e+07	4.26454e+07	4.72281e+07	2.87104e+07	2.49147e+07	2.68126e+07	4.61599e+07	2.57443e+07
High	Master Protein	P62269	Small ribosomal subunit protein uS13 OS=Homo sapiens OX=9606 GN=RPS18 PE=1 SV=3	51	12	67	12	17.7	RPS18	7.77243e+07	6.94155e+07	7.35699e+07	2.81831e+08	1.86767e+08	2.34299e+08	1.47254e+08	1.55254e+08	1.51254e+08	1.60729e+08	7.76838e+07
High	Master Protein	Q969V3	BOS complex subunit NCLN OS=Homo sapiens OX=9606 GN=NCLN PE=1 SV=2	39	17	67	17	62.9	NCLN	1.78124e+06	1.35656e+06	1.5689e+06	1.15083e+08	8.75822e+07	1.01333e+08	6.58947e+07	8.15705e+07	7.37326e+07	9.97639e+07	7.21637e+07
High	Master Protein	P61619	Protein transport protein Sec61 subunit alpha isoform 1 OS=Homo sapiens OX=9606 GN=SEC61A1 PE=1 SV=2	36	13	66	8	52.2	SEC61A1	3.98264e+06	2.97029e+06	3.47646e+06	3.40722e+08	2.45297e+08	2.93009e+08	1.93673e+08	2.08308e+08	2.00991e+08	2.89533e+08	1.97514e+08
High	Master Protein	Q13263	Transcription intermediary factor 1-beta OS=Homo sapiens OX=9606 GN=TRIM28 PE=1 SV=5	28	16	66	16	88.5	TRIM28	1.41275e+07	8.59011e+06	1.13588e+07	4.70652e+07	3.80987e+07	4.25819e+07	3.46089e+07	3.81191e+07	3.6364e+07	3.12231e+07	2.50052e+07
High	Master Protein	P60842	Eukaryotic initiation factor 4A-I OS=Homo sapiens OX=9606 GN=EIF4A1 PE=1 SV=1	42	14	66	13	46.1	EIF4A1	7.349e+07	5.27369e+07	6.31135e+07	9.85531e+07	8.58901e+07	9.22216e+07	6.57405e+07	8.43311e+07	7.50358e+07	2.91081e+07	1.19223e+07
High	Master Protein	P52292	Importin subunit alpha-1 OS=Homo sapiens OX=9606 GN=KPNA2 PE=1 SV=1	45	15	65	15	57.8	KPNA2	4.12968e+07	2.35085e+07	3.24027e+07	9.96939e+07	9.70258e+07	9.83599e+07	6.18914e+07	66381527	6.41365e+07	6.59572e+07	3.17338e+07
High	Master Protein	O14950	Myosin regulatory light chain 12B OS=Homo sapiens OX=9606 GN=MYL12B PE=1 SV=2	63	11	65	11	19.8	MYL12B	9.71226e+07	6.46339e+07	8.08783e+07	3.13503e+08	1.49035e+08	2.31269e+08	1.19236e+08	1.31904e+08	1.2557e+08	1.5039e+08	4.46916e+07
High	Master Protein	Q5SRE5	Nucleoporin NUP188 OS=Homo sapiens OX=9606 GN=NUP188 PE=1 SV=1	23	28	65	28	195.9	NUP188	655244	837332	746288	7.87325e+07	6.4188e+07	7.14603e+07	4.87185e+07	5.19707e+07	5.03446e+07	7.0714e+07	4.95983e+07
High	Master Protein	O00165	HCLS1-associated protein X-1 OS=Homo sapiens OX=9606 GN=HAX1 PE=1 SV=2	68	16	65	16	31.6	HAX1	1.25273e+07	7.49567e+06	1.00115e+07	2.00918e+08	1.2082e+08	1.60869e+08	9.57356e+07	1.42956e+08	1.19346e+08	1.50858e+08	1.09334e+08
High	Master Protein	P50991	T-complex protein 1 subunit delta OS=Homo sapiens OX=9606 GN=CCT4 PE=1 SV=4	50	19	64	19	57.9	CCT4	1.882e+07	9.36339e+06	1.40917e+07	8.60142e+07	9.44444e+07	9.02293e+07	6.10486e+07	7.65947e+07	6.88217e+07	7.61376e+07	5.47299e+07
High	Master Protein	Q96EY1	DnaJ homolog subfamily A member 3, mitochondrial OS=Homo sapiens OX=9606 GN=DNAJA3 PE=1 SV=2	35	15	64	15	52.5	DNAJA3	1.92233e+07	8.671e+06	1.39471e+07	1.44251e+08	1.16375e+08	1.30313e+08	88468311	1.16705e+08	1.02587e+08	1.16366e+08	8.86397e+07
High	Master Protein	O95816	BAG family molecular chaperone regulator 2 OS=Homo sapiens OX=9606 GN=BAG2 PE=1 SV=1	62	11	64	11	23.8	BAG2	1.31244e+07	7.19591e+06	1.01602e+07	1.33251e+08	8.97393e+07	1.11495e+08	8.87911e+07	1.11633e+08	1.00212e+08	1.01335e+08	9.00519e+07
High	Master Protein	P62829	Large ribosomal subunit protein uL14 OS=Homo sapiens OX=9606 GN=RPL23 PE=1 SV=1	71	9	64	9	14.9	RPL23	3.63577e+07	2.11528e+07	2.87553e+07	2.09008e+08	2.29293e+08	2.1915e+08	1.63217e+08	1.88764e+08	1.7599e+08	1.90395e+08	1.47235e+08
High	Master Protein	Q9Y679	Lipid droplet-regulating VLDL assembly factor AUP1 OS=Homo sapiens OX=9606 GN=AUP1 PE=1 SV=2	50	14	64	14	45.8	AUP1	2.79499e+06	1.72425e+06	2.25962e+06	1.45809e+08	1.14708e+08	130258705	8.11402e+07	1.01725e+08	9.14325e+07	1.27999e+08	8.91729e+07
High	Master Protein	P14923	Junction plakoglobin OS=Homo sapiens OX=9606 GN=JUP PE=1 SV=3	30	17	64	15	81.7	JUP	4.55508e+06	1.50398e+07	9.79746e+06	1.97511e+07	1.90459e+07	19398501	1.42282e+07	1.43256e+07	1.42769e+07	9.60104e+06	4.47943e+06
High	Master Protein	P36578	Large ribosomal subunit protein uL4 OS=Homo sapiens OX=9606 GN=RPL4 PE=1 SV=5	42	17	63	17	47.7	RPL4	2.20084e+07	1.36375e+07	1.7823e+07	1.30098e+08	1.4024e+08	1.35169e+08	9.42478e+07	1.19143e+08	1.06695e+08	1.17346e+08	8.88723e+07
High	Master Protein	Q92973	Transportin-1 OS=Homo sapiens OX=9606 GN=TNPO1 PE=1 SV=2	27	19	63	14	102.3	TNPO1	2.30654e+06	1.36479e+06	1.83567e+06	8.17134e+07	7.07892e+07	7.62513e+07	6.24196e+07	5.93254e+07	6.08725e+07	7.44156e+07	5.90368e+07
High	Master Protein	Q9UBF2	Coatomer subunit gamma-2 OS=Homo sapiens OX=9606 GN=COPG2 PE=1 SV=1	28	18	63	16	97.6	COPG2	8.91408e+06	6.75245e+06	7.83326e+06	6.36e+07	5.52181e+07	5.94091e+07	4.88008e+07	5.16433e+07	5.0222e+07	5.15758e+07	4.23888e+07
High	Master Protein	O43143	ATP-dependent RNA helicase DHX15 OS=Homo sapiens OX=9606 GN=DHX15 PE=1 SV=2	27	17	63	17	90.9	DHX15	9.06044e+07	8.49982e+07	8.78013e+07	1.86121e+08	1.44007e+08	1.65064e+08	1.18408e+08	1.52756e+08	1.35582e+08	7.72628e+07	4.77805e+07
High	Master Protein	Q9NXS2	Glutaminyl-peptide cyclotransferase-like protein OS=Homo sapiens OX=9606 GN=QPCTL PE=1 SV=2	54	15	62	15	42.9	QPCTL	2.9244e+07	1.59026e+07	2.25733e+07	2.59168e+08	1.74979e+08	217073371	1.337e+08	1.90807e+08	1.62254e+08	1.945e+08	1.3968e+08
High	Master Protein	Q9Y512	Sorting and assembly machinery component 50 homolog OS=Homo sapiens OX=9606 GN=SAMM50 PE=1 SV=3	49	17	62	17	51.9	SAMM50	701660	1.5964e+06	1.14903e+06	1.25193e+08	119058524	1.22126e+08	9.49881e+07	1.14047e+08	1.04518e+08	1.20977e+08	1.03369e+08
High	Master Protein	Q12905	Interleukin enhancer-binding factor 2 OS=Homo sapiens OX=9606 GN=ILF2 PE=1 SV=2	55	16	62	16	43	ILF2	1.75612e+07	1.05296e+07	1.40454e+07	9.7355e+07	7.30521e+07	8.52036e+07	5.06397e+07	6.8876e+07	5.97579e+07	7.11581e+07	4.57125e+07
High	Master Protein	P40227	T-complex protein 1 subunit zeta OS=Homo sapiens OX=9606 GN=CCT6A PE=1 SV=3	47	21	61	18	58	CCT6A	1.34226e+07	9.14358e+06	1.12831e+07	8.76281e+07	7.95141e+07	8.35711e+07	6.45278e+07	7.1481e+07	6.80044e+07	7.2288e+07	5.67213e+07
High	Master Protein	Q9NXE4	Sphingomyelin phosphodiesterase 4 OS=Homo sapiens OX=9606 GN=SMPD4 PE=1 SV=3	28	20	60	20	97.7	SMPD4	289718	200302	245010	1.03279e+08	8.17827e+07	9.2531e+07	6.56964e+07	6.28696e+07	6.4283e+07	9.2286e+07	6.4038e+07
High	Master Protein	P55072	Transitional endoplasmic reticulum ATPase OS=Homo sapiens OX=9606 GN=VCP PE=1 SV=4	35	23	60	23	89.3	VCP	4.16157e+06	3.03522e+06	3.59839e+06	5.817e+07	4.65167e+07	5.23433e+07	4.56257e+07	6.04742e+07	5.30499e+07	4.87449e+07	4.94515e+07
High	Master Protein	Q9Y3F4	Serine-threonine kinase receptor-associated protein OS=Homo sapiens OX=9606 GN=STRAP PE=1 SV=1	66	18	60	18	38.4	STRAP	1.66651e+07	9.80835e+06	1.32367e+07	9.34415e+07	7.33317e+07	8.33866e+07	4.65515e+07	6.76337e+07	5.70926e+07	7.01499e+07	4.38559e+07
High	Master Protein	P35606	Coatomer subunit beta' OS=Homo sapiens OX=9606 GN=COPB2 PE=1 SV=2	31	20	60	20	102.4	COPB2	6.24054e+06	7.50675e+06	6.87364e+06	6.50105e+07	5.43942e+07	5.97024e+07	4.76758e+07	5.97833e+07	5.37295e+07	5.28287e+07	4.68559e+07
High	Master Protein	Q07065	Cytoskeleton-associated protein 4 OS=Homo sapiens OX=9606 GN=CKAP4 PE=1 SV=2	47	21	60	21	66	CKAP4	3.03568e+06	2.3651e+06	2.70039e+06	5.7559e+07	4.41941e+07	5.08766e+07	4.09033e+07	4.52466e+07	4.3075e+07	4.81762e+07	4.03746e+07
High	Master Protein	Q9Y285	Phenylalanine--tRNA ligase alpha subunit OS=Homo sapiens OX=9606 GN=FARSA PE=1 SV=3	43	14	60	14	57.5	FARSA	7.54015e+06	5.53699e+06	6.53857e+06	7.06859e+07	5.98766e+07	6.52813e+07	4.21835e+07	5.32805e+07	4.7732e+07	5.87427e+07	4.11934e+07
High	Master Protein	Q96CS3	FAS-associated factor 2 OS=Homo sapiens OX=9606 GN=FAF2 PE=1 SV=2	46	17	59	17	52.6	FAF2	5.17399e+06	2.78441e+06	3.9792e+06	1.08864e+08	8.33998e+07	9.61318e+07	7.99548e+07	8.95295e+07	8.47421e+07	9.21526e+07	8.07629e+07
High	Master Protein	P15880	Small ribosomal subunit protein uS5 OS=Homo sapiens OX=9606 GN=RPS2 PE=1 SV=2	48	12	59	12	31.3	RPS2	6.35417e+07	4.15676e+07	5.25546e+07	2.23583e+08	1.96512e+08	2.10048e+08	1.62975e+08	2.51255e+08	2.07115e+08	1.57493e+08	1.5456e+08
High	Master Protein	Q6YHU6	tRNA (32-2'-O)-methyltransferase regulator THADA OS=Homo sapiens OX=9606 GN=THADA PE=1 SV=1	18	26	59	26	219.5	THADA	242479	180251	211365	3.96238e+07	3.3675e+07	3.66494e+07	2.25607e+07	1.68908e+07	1.97257e+07	3.64381e+07	1.95144e+07
High	Master Protein	P62195	26S proteasome regulatory subunit 8 OS=Homo sapiens OX=9606 GN=PSMC5 PE=1 SV=1	46	13	59	12	45.6	PSMC5	4.42222e+06	3.61538e+06	4.0188e+06	6.2611e+07	5.67289e+07	5.96699e+07	5.60283e+07	6.83506e+07	6.21894e+07	5.56511e+07	5.81706e+07
High	Master Protein	Q9NNW5	tRNA (34-2'-O)-methyltransferase regulator WDR6 OS=Homo sapiens OX=9606 GN=WDR6 PE=1 SV=1	24	20	59	20	121.6	WDR6	3.8158e+06	3.15226e+06	3.48403e+06	8.35358e+07	6.93643e+07	7.64501e+07	5.82239e+07	6.12037e+07	5.97138e+07	7.2966e+07	5.62298e+07
High	Master Protein	Q9BSJ2	Gamma-tubulin complex component 2 OS=Homo sapiens OX=9606 GN=TUBGCP2 PE=1 SV=2	39	24	58	24	102.5	TUBGCP2	264067	1.08947e+06	676769	5.18974e+07	3.6925e+07	4.44112e+07	3.2347e+07	3.71099e+07	3.47285e+07	4.37344e+07	3.40517e+07
High	Master Protein	Q53GQ0	Very-long-chain 3-oxoacyl-CoA reductase OS=Homo sapiens OX=9606 GN=HSD17B12 PE=1 SV=2	53	13	58	13	34.3	HSD17B12	2.90603e+06	3.50774e+06	3.20689e+06	103475295	96425631	99950463	7.37688e+07	1.03796e+08	8.87822e+07	9.67436e+07	8.55753e+07
High	Master Protein	Q00839	Heterogeneous nuclear ribonucleoprotein U OS=Homo sapiens OX=9606 GN=HNRNPU PE=1 SV=6	26	15	58	15	90.5	HNRNPU	1.74277e+07	1.29993e+07	1.52135e+07	1.67096e+08	1.15363e+08	1.4123e+08	1.04247e+08	1.0918e+08	1.06713e+08	1.26016e+08	9.14998e+07
High	Master Protein	P55786	Puromycin-sensitive aminopeptidase OS=Homo sapiens OX=9606 GN=NPEPPS PE=1 SV=2	24	19	58	19	103.2	NPEPPS	4.49264e+06	3964902	4.22877e+06	7.28594e+07	5.74802e+07	6.51698e+07	6.10322e+07	6.56201e+07	6.33262e+07	6.0941e+07	5.90974e+07
High	Master Protein	P00367	Glutamate dehydrogenase 1, mitochondrial OS=Homo sapiens OX=9606 GN=GLUD1 PE=1 SV=2	46	18	57	18	61.4	GLUD1	3.20789e+06	2.07918e+06	2.64354e+06	1.165e+08	9.62964e+07	1.06398e+08	8.09273e+07	8.49803e+07	8.29538e+07	1.03755e+08	8.03102e+07
High	Master Protein	Q96TA2	ATP-dependent zinc metalloprotease YME1L1 OS=Homo sapiens OX=9606 GN=YME1L1 PE=1 SV=2	33	19	57	19	86.4	YME1L1	2.80964e+06	1.12035e+06	1.96499e+06	8.50625e+07	8.93922e+07	8.72273e+07	5.71467e+07	7.76649e+07	6.74058e+07	8.52624e+07	6.54408e+07
High	Master Protein	Q99832	T-complex protein 1 subunit eta OS=Homo sapiens OX=9606 GN=CCT7 PE=1 SV=2	42	17	56	17	59.3	CCT7	9.92716e+06	7.49404e+06	8.7106e+06	5.37945e+07	5.68117e+07	5.53031e+07	4.07051e+07	4.79656e+07	4.43353e+07	4.65925e+07	3.56247e+07
High	Master Protein	P00403	Cytochrome c oxidase subunit 2 OS=Homo sapiens OX=9606 GN=MT-CO2 PE=1 SV=1	28	6	56	6	25.5	MT-CO2	4.87331e+06	2.02491e+06	3.44911e+06	2.71387e+08	1.83165e+08	2.27276e+08	2.19528e+08	242661118	2.31094e+08	2.23827e+08	2.27645e+08
High	Master Protein	P45880	Voltage-dependent anion-selective channel protein 2 OS=Homo sapiens OX=9606 GN=VDAC2 PE=1 SV=2	53	13	56	13	31.5	VDAC2	9.81617e+06	8.72103e+06	9.2686e+06	2.9157e+08	2.50166e+08	2.70868e+08	1.74981e+08	2.40057e+08	2.07519e+08	2.61599e+08	1.9825e+08
High	Master Protein	O95433	Activator of 90 kDa heat shock protein ATPase homolog 1 OS=Homo sapiens OX=9606 GN=AHSA1 PE=1 SV=1	33	10	56	10	38.3	AHSA1	13029530	9.80529e+06	1.14174e+07	8.8067e+07	6.2443e+07	7.5255e+07	5.36405e+07	6.75882e+07	6.06143e+07	6.38376e+07	4.91969e+07
High	Master Protein	P33527	Multidrug resistance-associated protein 1 OS=Homo sapiens OX=9606 GN=ABCC1 PE=1 SV=3	19	21	56	21	171.5	ABCC1	864656	802790	833723	6.80868e+07	5.43449e+07	6.12158e+07	4.10225e+07	3.47576e+07	3.78901e+07	6.03821e+07	3.70563e+07
High	Master Protein	O14925	Mitochondrial import inner membrane translocase subunit Tim23 OS=Homo sapiens OX=9606 GN=TIMM23 PE=1 SV=1	66	9	56	9	21.9	TIMM23	3.93637e+06	4.18263e+06	4.0595e+06	1.27849e+08	84965450	1.06407e+08	9.41169e+07	1.10783e+08	1.0245e+08	1.02348e+08	9.83906e+07
High	Master Protein	P12004	Proliferating cell nuclear antigen OS=Homo sapiens OX=9606 GN=PCNA PE=1 SV=1	64	11	56	11	28.8	PCNA	1.61471e+07	6.2864e+06	1.12167e+07	108898810	9.17582e+07	1.00329e+08	89075541	1.01464e+08	9.52699e+07	8.91118e+07	8.40531e+07
High	Master Protein	P46379	Large proline-rich protein BAG6 OS=Homo sapiens OX=9606 GN=BAG6 PE=1 SV=2	20	17	56	17	119.3	BAG6	3.12753e+06	3.95588e+06	3.5417e+06	8.88221e+07	6.74223e+07	7.81222e+07	6.98839e+07	7.44601e+07	7.2172e+07	7.45805e+07	6.86303e+07
High	Master Protein	Q9P035	Very-long-chain (3R)-3-hydroxyacyl-CoA dehydratase 3 OS=Homo sapiens OX=9606 GN=HACD3 PE=1 SV=2	36	14	55	14	43.1	HACD3	6.16624e+06	4.51735e+06	5.3418e+06	459005319	3.51378e+08	4.05192e+08	2.97298e+08	2.83164e+08	2.90231e+08	3.9985e+08	2.84889e+08
High	Master Protein	Q6P3W7	SCY1-like protein 2 OS=Homo sapiens OX=9606 GN=SCYL2 PE=1 SV=1	32	19	55	19	103.6	SCYL2	335898	305354	320626	9.1762e+07	6.34885e+07	7.76252e+07	6.35145e+07	7.46542e+07	6.90844e+07	7.73046e+07	6.87637e+07
High	Master Protein	P46821	Microtubule-associated protein 1B OS=Homo sapiens OX=9606 GN=MAP1B PE=1 SV=2	12	20	55	20	270.5	MAP1B	2.86093e+06	2.8645e+06	2.86272e+06	6.48233e+07	4.75682e+07	5.61957e+07	3.65691e+07	4.17253e+07	3.91472e+07	5.3333e+07	3.62845e+07
High	Master Protein	Q9UBX3	Mitochondrial dicarboxylate carrier OS=Homo sapiens OX=9606 GN=SLC25A10 PE=1 SV=2	57	13	55	13	31.3	SLC25A10	4.84058e+06	2.89643e+06	3.8685e+06	9.42318e+07	6.54323e+07	7.98321e+07	5.6552e+07	7.48814e+07	6.57167e+07	7.59636e+07	6.18482e+07
High	Master Protein	Q04637	Eukaryotic translation initiation factor 4 gamma 1 OS=Homo sapiens OX=9606 GN=EIF4G1 PE=1 SV=4	18	23	54	23	175.4	EIF4G1	6.14259e+07	4.71688e+07	5.42974e+07	2.52627e+07	1.29826e+07	1.91226e+07	7.36906e+06	7.5711e+06	7.47008e+06	-3.51747e+07	-4.68273e+07
High	Master Protein	O95490	Adhesion G protein-coupled receptor L2 OS=Homo sapiens OX=9606 GN=ADGRL2 PE=1 SV=2	17	18	54	17	163.2	ADGRL2	150851	140619	145735	3.11642e+07	3.24006e+07	3.17824e+07	3.62058e+07	3.83149e+07	3.72604e+07	3.16367e+07	3.71146e+07
High	Master Protein	P52907	F-actin-capping protein subunit alpha-1 OS=Homo sapiens OX=9606 GN=CAPZA1 PE=1 SV=3	42	8	54	7	32.9	CAPZA1	5.70308e+07	3.14391e+07	4.42349e+07	1.31962e+08	1.08538e+08	1.2025e+08	6.73331e+07	8.80661e+07	7.76996e+07	7.60147e+07	3.34647e+07
High	Master Protein	P53985	Monocarboxylate transporter 1 OS=Homo sapiens OX=9606 GN=SLC16A1 PE=1 SV=3	24	13	54	13	53.9	SLC16A1	1.58308e+06	573075	1.07808e+06	1.98392e+08	1.32427e+08	1.65409e+08	1.01038e+08	9.2228e+07	9.66332e+07	1.64331e+08	9.55551e+07
High	Master Protein	Q15393	Splicing factor 3B subunit 3 OS=Homo sapiens OX=9606 GN=SF3B3 PE=1 SV=4	18	17	53	17	135.5	SF3B3	8.0408e+06	9.16808e+06	8.60444e+06	70860732	5.34235e+07	6.21421e+07	4.0229e+07	4.69121e+07	4.35705e+07	5.35377e+07	3.49661e+07
High	Master Protein	Q9Y5L0	Transportin-3 OS=Homo sapiens OX=9606 GN=TNPO3 PE=1 SV=3	30	19	53	19	104.1	TNPO3	779227	555540	667384	7.02616e+07	5.86065e+07	6.4434e+07	5.2711e+07	4.72028e+07	4.99569e+07	6.37667e+07	4.92895e+07
High	Master Protein	P51571	Translocon-associated protein subunit delta OS=Homo sapiens OX=9606 GN=SSR4 PE=1 SV=1	55	8	53	8	19	SSR4	5.65517e+06	2.33818e+06	3.99668e+06	2.14462e+08	1.40949e+08	1.77705e+08	1.26112e+08	1.22144e+08	1.24128e+08	1.73708e+08	1.20131e+08
High	Master Protein	Q12931	Heat shock protein 75 kDa, mitochondrial OS=Homo sapiens OX=9606 GN=TRAP1 PE=1 SV=3	24	12	53	11	80.1	TRAP1	1.19503e+08	77697739	9.86002e+07	8.09493e+07	6.8991e+07	7.49701e+07	6.297e+07	7.90632e+07	7.10166e+07	-2.36301e+07	-2.75836e+07
High	Master Protein	O43264	Centromere/kinetochore protein zw10 homolog OS=Homo sapiens OX=9606 GN=ZW10 PE=1 SV=3	32	17	53	17	88.8	ZW10	701943	1.19285e+06	947398	5.58867e+07	5.39632e+07	5.49249e+07	4.5e+07	5.03405e+07	4.76702e+07	5.39775e+07	4.67228e+07
High	Master Protein	P35232	Prohibitin 1 OS=Homo sapiens OX=9606 GN=PHB1 PE=1 SV=1	60	14	53	14	29.8	PHB1	8.35165e+06	7.05006e+06	7.70085e+06	6.04648e+07	4.32639e+07	5.18644e+07	3.25659e+07	4.50139e+07	3.87899e+07	4.41635e+07	3.1089e+07
High	Master Protein	Q86Y56	Dynein axonemal assembly factor 5 OS=Homo sapiens OX=9606 GN=DNAAF5 PE=1 SV=4	26	19	53	19	93.5	DNAAF5	697926	559668	628797	4.47463e+07	3.81095e+07	4.14279e+07	3.04063e+07	3.1682e+07	3.10442e+07	4.07991e+07	3.04154e+07
High	Master Protein	Q5H9R7	Serine/threonine-protein phosphatase 6 regulatory subunit 3 OS=Homo sapiens OX=9606 GN=PPP6R3 PE=1 SV=2	26	19	53	19	97.6	PPP6R3	4.49227e+07	812012	2.28674e+07	6.40667e+07	4.55416e+07	5.48041e+07	4.61877e+07	5.1322e+07	4.87548e+07	3.19368e+07	2.58875e+07
High	Master Protein	Q96HS1	Serine/threonine-protein phosphatase PGAM5, mitochondrial OS=Homo sapiens OX=9606 GN=PGAM5 PE=1 SV=2	64	15	53	15	32	PGAM5	1.09257e+07	9.41474e+06	1.01702e+07	2.02764e+08	1.45641e+08	1.74203e+08	1.06699e+08	1.44892e+08	1.25795e+08	1.64032e+08	1.15625e+08
High	Master Protein	P14625	Endoplasmin OS=Homo sapiens OX=9606 GN=HSP90B1 PE=1 SV=1	17	12	52	10	92.4	HSP90B1	4.26924e+06	3.2718e+06	3.77052e+06	3.12464e+07	2.47619e+07	28004153	2.01339e+07	2.26453e+07	2.13896e+07	2.42336e+07	1.76191e+07
High	Master Protein	Q7L8L6	FAST kinase domain-containing protein 5, mitochondrial OS=Homo sapiens OX=9606 GN=FASTKD5 PE=1 SV=1	26	16	52	16	86.5	FASTKD5	1.66077e+06	1.8813e+06	1.77103e+06	5.34631e+07	5.60249e+07	5.4744e+07	4.5066e+07	4.54148e+07	4.52404e+07	5.2973e+07	4.34693e+07
High	Master Protein	Q99460	26S proteasome non-ATPase regulatory subunit 1 OS=Homo sapiens OX=9606 GN=PSMD1 PE=1 SV=2	33	20	52	20	105.8	PSMD1	3.49155e+06	2.60522e+06	3.04838e+06	4.76501e+07	4.06325e+07	4.41413e+07	4.17157e+07	4.69407e+07	4.43282e+07	4.10929e+07	4.12798e+07
High	Master Protein	O75533	Splicing factor 3B subunit 1 OS=Homo sapiens OX=9606 GN=SF3B1 PE=1 SV=3	21	21	52	21	145.7	SF3B1	2.19279e+06	2.45232e+06	2.32256e+06	4.98397e+07	2.78806e+07	3.88601e+07	2.71151e+07	3.41015e+07	3.06083e+07	3.65376e+07	2.82857e+07
High	Master Protein	Q9H9B4	Sideroflexin-1 OS=Homo sapiens OX=9606 GN=SFXN1 PE=1 SV=4	57	14	52	12	35.6	SFXN1	7.01415e+06	4.51523e+06	5.76469e+06	1.10198e+08	7.72136e+07	9.37057e+07	5.14924e+07	5.60298e+07	5.37611e+07	8.7941e+07	4.79964e+07
High	Master Protein	P27348	14-3-3 protein theta OS=Homo sapiens OX=9606 GN=YWHAQ PE=1 SV=1	59	17	52	12	27.7	YWHAQ	9.71715e+06	6.92274e+06	8.31994e+06	5.40816e+07	4.49449e+07	4.95133e+07	4.00972e+07	4.78058e+07	4.39515e+07	4.11933e+07	3.56315e+07
High	Master Protein	P63104	14-3-3 protein zeta/delta OS=Homo sapiens OX=9606 GN=YWHAZ PE=1 SV=1	54	13	51	9	27.7	YWHAZ	1.02815e+07	5.30967e+06	7.79557e+06	3.26662e+07	1.87418e+07	2.5704e+07	1.62136e+07	2.86709e+07	2.24423e+07	1.79085e+07	1.46467e+07
High	Master Protein	P26641	Elongation factor 1-gamma OS=Homo sapiens OX=9606 GN=EEF1G PE=1 SV=3	40	16	51	16	50.1	EEF1G	2.76723e+07	2.29712e+07	2.53218e+07	1.06156e+08	8.40135e+07	9.50846e+07	62103793	7.46712e+07	6.83875e+07	6.97628e+07	4.30657e+07
High	Master Protein	Q9Y678	Coatomer subunit gamma-1 OS=Homo sapiens OX=9606 GN=COPG1 PE=1 SV=1	20	13	51	11	97.7	COPG1	4.11155e+06	5.61138e+06	4.86147e+06	29482291	2.65794e+07	2.80308e+07	2.71998e+07	2.45225e+07	2.58612e+07	2.31694e+07	2.09997e+07
High	Master Protein	Q8TCG1	Protein CIP2A OS=Homo sapiens OX=9606 GN=CIP2A PE=1 SV=2	25	22	51	22	102.1	CIP2A	1.25097e+06	1.19827e+06	1.22462e+06	6.13172e+07	5.77276e+07	5.95224e+07	3.1979e+07	2.58328e+07	2.89059e+07	5.82978e+07	2.76812e+07
High	Master Protein	Q9NYL9	Tropomodulin-3 OS=Homo sapiens OX=9606 GN=TMOD3 PE=1 SV=1	41	12	51	11	39.6	TMOD3	1.98615e+07	1.08911e+07	1.53763e+07	5.75711e+07	4.92098e+07	5.33905e+07	2.79077e+07	2.98798e+07	2.88937e+07	3.80142e+07	1.35174e+07
High	Master Protein	P07910	Heterogeneous nuclear ribonucleoproteins C1/C2 OS=Homo sapiens OX=9606 GN=HNRNPC PE=1 SV=4	29	10	51	10	33.7	HNRNPC	1.44435e+07	8.41945e+06	1.14315e+07	4.68417e+07	2.93593e+07	3.81005e+07	2.18054e+07	3.35465e+07	2.7676e+07	2.6669e+07	1.62445e+07
High	Master Protein	P57740	Nuclear pore complex protein Nup107 OS=Homo sapiens OX=9606 GN=NUP107 PE=1 SV=1	26	16	51	16	106.3	NUP107	1.21777e+06	925791	1.07178e+06	4.86809e+07	35749796	4.22153e+07	4.35339e+07	4.41004e+07	4.38172e+07	4.11436e+07	4.27454e+07
High	Master Protein	Q9UQE7	Structural maintenance of chromosomes protein 3 OS=Homo sapiens OX=9606 GN=SMC3 PE=1 SV=2	21	19	51	19	141.5	SMC3	3.78852e+06	3.91133e+06	3.84992e+06	4.08783e+07	2.75659e+07	3.42221e+07	2.88334e+07	3.48629e+07	3.18481e+07	3.03722e+07	2.79982e+07
High	Master Protein	Q14157	Ubiquitin-associated protein 2-like OS=Homo sapiens OX=9606 GN=UBAP2L PE=1 SV=2	22	16	51	16	114.5	UBAP2L	1.86054e+07	1.20504e+07	1.53279e+07	5.45792e+07	4.46579e+07	4.96186e+07	4.0748e+07	4.1564e+07	4.1156e+07	3.42907e+07	2.58281e+07
High	Master Protein	A0FGR8	Extended synaptotagmin-2 OS=Homo sapiens OX=9606 GN=ESYT2 PE=1 SV=1	28	19	51	19	102.3	ESYT2	5.51845e+06	4.81534e+06	5.1669e+06	1.0276e+08	7.13277e+07	8.7044e+07	6.33739e+07	7.16892e+07	6.75316e+07	8.18771e+07	6.23647e+07
High	Master Protein	P53007	Tricarboxylate transport protein, mitochondrial OS=Homo sapiens OX=9606 GN=SLC25A1 PE=1 SV=2	37	13	50	13	34	SLC25A1	1.53503e+07	1.02621e+07	1.28062e+07	1.70922e+08	1.23718e+08	1.4732e+08	1.0992e+08	149638468	1.29779e+08	1.34514e+08	1.16973e+08
High	Master Protein	P07197	Neurofilament medium polypeptide OS=Homo sapiens OX=9606 GN=NEFM PE=1 SV=3	24	19	50	18	102.4	NEFM	1.15697e+07	8.96269e+06	1.02662e+07	4.13065e+07	3.08952e+07	3.61009e+07	2.43115e+07	2.4944e+07	2.46277e+07	2.58347e+07	1.43616e+07
High	Master Protein	P62701	Small ribosomal subunit protein eS4, X isoform OS=Homo sapiens OX=9606 GN=RPS4X PE=1 SV=2	47	13	50	13	29.6	RPS4X	1.66807e+07	1.16161e+07	1.41484e+07	7.96311e+07	6.18878e+07	7.07595e+07	5.04773e+07	7.02226e+07	6.03499e+07	5.66111e+07	4.62015e+07
High	Master Protein	Q15645	Pachytene checkpoint protein 2 homolog OS=Homo sapiens OX=9606 GN=TRIP13 PE=1 SV=2	48	17	50	17	48.5	TRIP13	2.31498e+06	1.83184e+06	2.07341e+06	6.11448e+07	5.25521e+07	5.68484e+07	4.60765e+07	5.67456e+07	5.14111e+07	54775037	4.93377e+07
High	Master Protein	Q12769	Nuclear pore complex protein Nup160 OS=Homo sapiens OX=9606 GN=NUP160 PE=1 SV=3	16	18	49	18	162	NUP160	1.07674e+06	1.32153e+06	1.19914e+06	3.14903e+07	2.71679e+07	2.93291e+07	2.7548e+07	2.79891e+07	2.77686e+07	2.813e+07	2.65694e+07
High	Master Protein	Q5UIP0	Telomere-associated protein RIF1 OS=Homo sapiens OX=9606 GN=RIF1 PE=1 SV=2	11	19	49	19	274.3	RIF1	398906		398906	3.33584e+07	2.78162e+07	3.05873e+07	1.56427e+07	1.42187e+07	1.49307e+07	3.01884e+07	1.45318e+07
High	Master Protein	P11586	C-1-tetrahydrofolate synthase, cytoplasmic OS=Homo sapiens OX=9606 GN=MTHFD1 PE=1 SV=4	21	16	49	16	101.5	MTHFD1	9.14712e+06	4.99364e+06	7.07038e+06	4.70487e+07	3.2628e+07	3.98384e+07	3.12395e+07	3.18282e+07	3.15338e+07	3.2768e+07	2.44635e+07
High	Master Protein	Q92538	Golgi-specific brefeldin A-resistance guanine nucleotide exchange factor 1 OS=Homo sapiens OX=9606 GN=GBF1 PE=1 SV=2	14	20	48	20	206.3		3.37713e+06	379202	1.87817e+06	3.72116e+07	2.94736e+07	3.33426e+07	1.58693e+07	1.24833e+07	1.41763e+07	3.14644e+07	1.22981e+07
High	Master Protein	P51648	Aldehyde dehydrogenase family 3 member A2 OS=Homo sapiens OX=9606 GN=ALDH3A2 PE=1 SV=1	34	15	48	15	54.8	ALDH3A2	1.07915e+06		1.07915e+06	1.19039e+08	1.03712e+08	1.11376e+08	9.24234e+07	9.99316e+07	9.61775e+07	1.10297e+08	9.50983e+07
High	Master Protein	Q13045	Protein flightless-1 homolog OS=Homo sapiens OX=9606 GN=FLII PE=1 SV=2	15	15	48	15	144.7	FLII	1.09599e+07	8.09799e+06	9.52892e+06	3.73356e+07	2.62704e+07	3.1803e+07	2.01287e+07	2.09518e+07	2.05403e+07	2.22741e+07	1.10114e+07
High	Master Protein	Q96A65	Exocyst complex component 4 OS=Homo sapiens OX=9606 GN=EXOC4 PE=1 SV=1	19	15	48	15	110.4	EXOC4	2.44161e+06	1.88897e+06	2.16529e+06	2.89851e+07	2.05973e+07	2.47912e+07	1.99492e+07	2.23499e+07	2.11495e+07	2.26259e+07	1.89842e+07
High	Master Protein	Q9BW92	Threonine--tRNA ligase, mitochondrial OS=Homo sapiens OX=9606 GN=TARS2 PE=1 SV=1	26	15	48	15	81	TARS2	3.35437e+06	3.03153e+06	3.19295e+06	5.33523e+07	4.01424e+07	4.67474e+07	3.04025e+07	3.36962e+07	3.20494e+07	4.35544e+07	2.88564e+07
High	Master Protein	Q5SW79	Centrosomal protein of 170 kDa OS=Homo sapiens OX=9606 GN=CEP170 PE=1 SV=1	11	14	47	14	175.2	CEP170	1.0936e+07	8.31271e+06	9.62434e+06	1.68364e+07	1.4083e+07	1.54597e+07	7.49432e+06	9.33084e+06	8.41258e+06	5.8354e+06	-1.21176e+06
High	Master Protein	P46060	Ran GTPase-activating protein 1 OS=Homo sapiens OX=9606 GN=RANGAP1 PE=1 SV=1	43	14	47	14	63.5	RANGAP1	6.91345e+06	4.43211e+06	5.67278e+06	3.68955e+07	2.93534e+07	3.31245e+07	2.63675e+07	3.07162e+07	2.85419e+07	2.74517e+07	2.28691e+07
High	Master Protein	O75306	NADH dehydrogenase [ubiquinone] iron-sulfur protein 2, mitochondrial OS=Homo sapiens OX=9606 GN=NDUFS2 PE=1 SV=2	37	16	47	16	52.5	NDUFS2	9.21327e+06	894953	5.05411e+06	6.2499e+07	5.32313e+07	5.78651e+07	4.3097e+07	4.91961e+07	4.61466e+07	5.2811e+07	4.10925e+07
High	Master Protein	O75489	NADH dehydrogenase [ubiquinone] iron-sulfur protein 3, mitochondrial OS=Homo sapiens OX=9606 GN=NDUFS3 PE=1 SV=1	56	14	47	14	30.2	NDUFS3	2.74055e+06	2.03413e+06	2.38734e+06	9.72842e+07	5.92672e+07	7.82757e+07	5.24625e+07	7.77084e+07	6.50854e+07	7.58884e+07	6.26981e+07
High	Master Protein	P53396	ATP-citrate synthase OS=Homo sapiens OX=9606 GN=ACLY PE=1 SV=3	20	18	47	18	120.8	ACLY	7.73226e+06	5.22495e+06	6.4786e+06	2.25497e+07	1.66088e+07	1.95792e+07	1.6882e+07	1.89231e+07	1.79026e+07	1.31006e+07	1.14239e+07
High	Master Protein	P51570	Galactokinase OS=Homo sapiens OX=9606 GN=GALK1 PE=1 SV=1	41	13	47	13	42.2	GALK1	5.58677e+06	2.57916e+06	4.08296e+06	5.42707e+07	3.51872e+07	4.4729e+07	3.06511e+07	3.79887e+07	3.43199e+07	4.0646e+07	3.02369e+07
High	Master Protein	O94832	Unconventional myosin-Id OS=Homo sapiens OX=9606 GN=MYO1D PE=1 SV=2	18	16	47	16	116.1	MYO1D	1.25818e+07	1.15547e+07	1.20682e+07	5.2475e+07	3.9837e+07	4.6156e+07	2.30792e+07	2.62096e+07	24644435	3.40878e+07	1.25762e+07
High	Master Protein	P30837	Aldehyde dehydrogenase X, mitochondrial OS=Homo sapiens OX=9606 GN=ALDH1B1 PE=1 SV=4	34	15	47	14	57.2	ALDH1B1	1.51723e+06	1.03625e+06	1.27674e+06	6.59811e+07	49050816	5.7516e+07	4.27507e+07	5.07402e+07	4.67454e+07	5.62392e+07	4.54687e+07
High	Master Protein	P35998	26S proteasome regulatory subunit 7 OS=Homo sapiens OX=9606 GN=PSMC2 PE=1 SV=3	42	13	46	13	48.6	PSMC2	3.31756e+06	2.16684e+06	2.7422e+06	3.05543e+07	2.49409e+07	2.77476e+07	1.88729e+07	2.18567e+07	2.03648e+07	2.50054e+07	1.76226e+07
High	Master Protein	Q8NI60	Atypical kinase COQ8A, mitochondrial OS=Homo sapiens OX=9606 GN=COQ8A PE=1 SV=1	25	13	46	13	71.9	COQ8A	903980	3.64523e+06	2.2746e+06	6.8361e+07	5.18194e+07	6.00902e+07	4.72075e+07	5.38736e+07	5.05405e+07	5.78156e+07	4.82659e+07
High	Master Protein	Q15386	Ubiquitin-protein ligase E3C OS=Homo sapiens OX=9606 GN=UBE3C PE=1 SV=3	23	17	46	17	123.8	UBE3C	5.91278e+06	5.2217e+06	5.56724e+06	3.39948e+07	2.02785e+07	2.71366e+07	1.95775e+07	2.14802e+07	2.05288e+07	2.15694e+07	1.49616e+07
High	Master Protein	Q8IXI1	Mitochondrial Rho GTPase 2 OS=Homo sapiens OX=9606 GN=RHOT2 PE=1 SV=2	37	15	46	14	68.1	RHOT2	2.76238e+06	2.13846e+06	2.45042e+06	1.00204e+08	8.69021e+07	9.35532e+07	8.74869e+07	9.60204e+07	9.17537e+07	9.11028e+07	8.93032e+07
High	Master Protein	P42356	Phosphatidylinositol 4-kinase alpha OS=Homo sapiens OX=9606 GN=PI4KA PE=1 SV=4	11	18	46	18	236.7	PI4KA	655747	841667	748707	2.01094e+07	1.25567e+07	1.63331e+07	9.89301e+06	8.77472e+06	9.33386e+06	1.55844e+07	8.58516e+06
High	Master Protein	P43243	Matrin-3 OS=Homo sapiens OX=9606 GN=MATR3 PE=1 SV=2	28	14	46	14	94.6	MATR3	6.49675e+06	5.02218e+06	5.75947e+06	68514690	50190102	59352396	5.60193e+07	6.13472e+07	5.86833e+07	5.35929e+07	5.29238e+07
High	Master Protein	Q6AI08	HEAT repeat-containing protein 6 OS=Homo sapiens OX=9606 GN=HEATR6 PE=1 SV=1	18	17	46	17	128.7	HEATR6		68472.5	68472.5	1.79038e+07	1.43914e+07	1.61476e+07	1.06465e+07	1.26125e+07	1.16295e+07	1.60791e+07	1.1561e+07
High	Master Protein	Q9NX63	MICOS complex subunit MIC19 OS=Homo sapiens OX=9606 GN=CHCHD3 PE=1 SV=1	43	11	46	11	26.1	CHCHD3	1.91499e+06	1.26775e+06	1.59137e+06	7.28589e+07	6.52966e+07	6.90777e+07	4.09777e+07	6.53657e+07	5.31717e+07	6.74864e+07	5.15803e+07
High	Master Protein	P35222	Catenin beta-1 OS=Homo sapiens OX=9606 GN=CTNNB1 PE=1 SV=1	22	14	46	12	85.4	CTNNB1	509977	938328	724152	2.4806e+07	1.9345e+07	2.20755e+07	1.9396e+07	1.99541e+07	1.96751e+07	2.13514e+07	1.89509e+07
High	Master Protein	P51617	Interleukin-1 receptor-associated kinase 1 OS=Homo sapiens OX=9606 GN=IRAK1 PE=1 SV=2	25	12	46	12	76.5	IRAK1	1.12149e+06	1.74682e+06	1.43415e+06	4.45024e+07	4.02211e+07	4.23618e+07	2.95025e+07	3.6093e+07	3.27977e+07	4.09276e+07	3.13636e+07
High	Master Protein	O15084	Serine/threonine-protein phosphatase 6 regulatory ankyrin repeat subunit A OS=Homo sapiens OX=9606 GN=ANKRD28 PE=1 SV=5	19	16	46	14	112.9	ANKRD28	759111	907047	833079	3.97924e+07	2.99528e+07	3.48726e+07	2.79578e+07	3.32089e+07	3.05833e+07	3.40395e+07	2.97503e+07
High	Master Protein	Q9BSJ8	Extended synaptotagmin-1 OS=Homo sapiens OX=9606 GN=ESYT1 PE=1 SV=1	18	13	45	13	122.8	ESYT1	5.10587e+06	4.37092e+06	4.7384e+06	5.20457e+07	3.85679e+07	4.53068e+07	3.07146e+07	3.22208e+07	3.14677e+07	4.05684e+07	2.67293e+07
High	Master Protein	Q14160	Protein scribble homolog OS=Homo sapiens OX=9606 GN=SCRIB PE=1 SV=5	11	13	45	11	174.8	SCRIB	4.66722e+06	4.44132e+06	4.55427e+06	2.41502e+07	1.43307e+07	1.92405e+07	1.11424e+07	1.47667e+07	1.29545e+07	1.46862e+07	8.40027e+06
High	Master Protein	Q96D53	Atypical kinase COQ8B, mitochondrial OS=Homo sapiens OX=9606 GN=COQ8B PE=1 SV=2	47	18	45	18	60	COQ8B		125269	125269	3.86721e+07	3.35296e+07	3.61008e+07	2.81002e+07	2.73653e+07	2.77327e+07	3.59756e+07	2.76075e+07
High	Master Protein	P22695	Cytochrome b-c1 complex subunit 2, mitochondrial OS=Homo sapiens OX=9606 GN=UQCRC2 PE=1 SV=3	43	15	45	15	48.4	UQCRC2	3.7108e+06	2.39309e+06	3.05195e+06	5.29707e+07	4.47629e+07	4.88668e+07	4.07462e+07	4.61385e+07	4.34424e+07	4.58149e+07	4.03904e+07
High	Master Protein	P62263	Small ribosomal subunit protein uS11 OS=Homo sapiens OX=9606 GN=RPS14 PE=1 SV=3	42	8	45	8	16.3	RPS14	1.68617e+07	1.09639e+07	1.39128e+07	9.28716e+07	6.97722e+07	8.13219e+07	60523988	6.4261e+07	6.23925e+07	6.74091e+07	4.84796e+07
High	Master Protein	P43686	26S proteasome regulatory subunit 6B OS=Homo sapiens OX=9606 GN=PSMC4 PE=1 SV=2	48	13	45	13	47.3	PSMC4	4.37153e+06	1.94594e+06	3.15874e+06	6.38537e+07	4.73581e+07	5.56059e+07	4.43758e+07	5.31222e+07	4.8749e+07	5.24472e+07	4.55903e+07
High	Master Protein	P32119	Peroxiredoxin-2 OS=Homo sapiens OX=9606 GN=PRDX2 PE=1 SV=5	35	10	45	9	21.9	PRDX2	1.427e+07	9.48218e+06	1.18761e+07	5.13844e+07	3.41188e+07	4.27516e+07	2.66778e+07	3.06144e+07	2.86461e+07	3.08755e+07	1.677e+07
High	Master Protein	P39023	Large ribosomal subunit protein uL3 OS=Homo sapiens OX=9606 GN=RPL3 PE=1 SV=2	26	8	44	8	46.1	RPL3	5.51162e+06	4.36788e+06	4.93975e+06	5.13394e+07	4.29651e+07	4.71523e+07	2.86471e+07	3.98813e+07	3.42642e+07	4.22125e+07	2.93245e+07
High	Master Protein	Q92900	Regulator of nonsense transcripts 1 OS=Homo sapiens OX=9606 GN=UPF1 PE=1 SV=2	14	13	44	13	124.3	UPF1	6.61894e+06	5.89854e+06	6.25874e+06	2.66752e+07	1.8112e+07	2.23936e+07	1.65265e+07	2.09676e+07	1.8747e+07	1.61349e+07	1.24883e+07
High	Master Protein	O14735	CDP-diacylglycerol--inositol 3-phosphatidyltransferase OS=Homo sapiens OX=9606 GN=CDIPT PE=1 SV=1	28	6	44	6	23.5	CDIPT	1.70806e+06	1.14885e+06	1.42845e+06	1.70575e+08	1.21018e+08	1.45797e+08	1.05964e+08	1.1835e+08	1.12157e+08	1.44368e+08	1.10728e+08
High	Master Protein	O60341	Lysine-specific histone demethylase 1A OS=Homo sapiens OX=9606 GN=KDM1A PE=1 SV=2	23	15	44	15	92.8	KDM1A	1.8992e+06	1.73542e+06	1.81731e+06	2.15033e+07	1.5012e+07	1.82576e+07	1.45949e+07	1.62442e+07	1.54196e+07	1.64403e+07	1.36023e+07
High	Master Protein	P48047	ATP synthase subunit O, mitochondrial OS=Homo sapiens OX=9606 GN=ATP5PO PE=1 SV=1	64	12	44	12	23.3	ATP5PO	2.57263e+06	3.89862e+06	3.23563e+06	8.0804e+07	5.34198e+07	6.71119e+07	5.14152e+07	6.70159e+07	5.92156e+07	6.38763e+07	5.59799e+07
High	Master Protein	P13797	Plastin-3 OS=Homo sapiens OX=9606 GN=PLS3 PE=1 SV=4	26	14	44	14	70.8	PLS3	1.47298e+07	7.77189e+06	1.12509e+07	4.49774e+07	2.97393e+07	3.73584e+07	2.56378e+07	2.87508e+07	2.71943e+07	2.61075e+07	1.59434e+07
High	Master Protein	Q16576	Histone-binding protein RBBP7 OS=Homo sapiens OX=9606 GN=RBBP7 PE=1 SV=1	36	11	43	5	47.8	RBBP7	1.58133e+07	8.46989e+06	1.21416e+07	8.54625e+07	5.52967e+07	7.03796e+07	4.69851e+07	5.73692e+07	5.21772e+07	5.8238e+07	4.00356e+07
High	Master Protein	Q15758	Neutral amino acid transporter B(0) OS=Homo sapiens OX=9606 GN=SLC1A5 PE=1 SV=2	22	10	43	10	56.6	SLC1A5	7.7607e+06	6.33106e+06	7.04588e+06	1.42389e+08	1.06145e+08	1.24267e+08	8.65261e+07	1.05592e+08	9.60589e+07	1.17221e+08	8.90131e+07
High	Master Protein	P57088	Transmembrane protein 33 OS=Homo sapiens OX=9606 GN=TMEM33 PE=1 SV=2	33	9	43	9	28	TMEM33	1.42607e+07	8.34558e+06	1.13031e+07	3.29076e+08	2.85788e+08	3.07432e+08	2.02828e+08	2.39144e+08	2.20986e+08	2.96129e+08	2.09683e+08
High	Master Protein	Q6UB35	Monofunctional C1-tetrahydrofolate synthase, mitochondrial OS=Homo sapiens OX=9606 GN=MTHFD1L PE=1 SV=1	21	16	43	16	105.7	MTHFD1L	3.39886e+06	2.1351e+06	2.76698e+06	3.24946e+07	2.29472e+07	27720876	1.87077e+07	2.12683e+07	1.9988e+07	2.49539e+07	1.7221e+07
High	Master Protein	Q99714	3-hydroxyacyl-CoA dehydrogenase type-2 OS=Homo sapiens OX=9606 GN=HSD17B10 PE=1 SV=3	60	9	43	9	26.9	HSD17B10	2.94165e+06	2.78889e+06	2.86527e+06	2.17351e+07	1.45508e+07	1.81429e+07	1.47618e+07	1.71637e+07	1.59628e+07	1.52777e+07	1.30975e+07
High	Master Protein	Q5JPH6	Probable glutamate--tRNA ligase, mitochondrial OS=Homo sapiens OX=9606 GN=EARS2 PE=1 SV=2	31	13	42	13	58.7	EARS2	167690	419841	293765	3.44484e+07	2.4998e+07	2.97232e+07	1.84414e+07	2.17927e+07	2.01171e+07	2.94294e+07	1.98233e+07
High	Master Protein	P17980	26S proteasome regulatory subunit 6A OS=Homo sapiens OX=9606 GN=PSMC3 PE=1 SV=3	43	16	42	16	49.2	PSMC3	3.39769e+06	2.47329e+06	2.93549e+06	7.34653e+07	5.0036e+07	6.17506e+07	4.04909e+07	5.71663e+07	4.88286e+07	5.88152e+07	4.58931e+07
High	Master Protein	P25786	Proteasome subunit alpha type-1 OS=Homo sapiens OX=9606 GN=PSMA1 PE=1 SV=1	49	14	42	14	29.5	PSMA1	3.23662e+06	2.29784e+06	2.76723e+06	40646534	2.89337e+07	3.47901e+07	2.02892e+07	3.18756e+07	2.60824e+07	3.20229e+07	2.33152e+07
High	Master Protein	P47756	F-actin-capping protein subunit beta OS=Homo sapiens OX=9606 GN=CAPZB PE=1 SV=5	61	13	42	13	30.6	CAPZB	2.56467e+07	1.51852e+07	2.04159e+07	8.56346e+07	6.07095e+07	7.3172e+07	3.81611e+07	4.6202e+07	4.21815e+07	5.27561e+07	2.17656e+07
High	Master Protein	Q92945	Far upstream element-binding protein 2 OS=Homo sapiens OX=9606 GN=KHSRP PE=1 SV=4	23	12	42	12	73.1	KHSRP	6.94721e+06	4.95023e+06	5.94872e+06	3.23394e+07	2.56377e+07	2.89885e+07	2.07912e+07	2.32784e+07	2.20348e+07	2.30398e+07	1.60861e+07
High	Master Protein	P61981	14-3-3 protein gamma OS=Homo sapiens OX=9606 GN=YWHAG PE=1 SV=2	51	11	42	7	28.3	YWHAG	2.78508e+06	2.09953e+06	2442305	1.03366e+07	7.34819e+06	8.84242e+06	7.41745e+06	8.68233e+06	8.04989e+06	6.40012e+06	5.60759e+06
High	Master Protein	Q7L2E3	ATP-dependent RNA helicase DHX30 OS=Homo sapiens OX=9606 GN=DHX30 PE=1 SV=1	15	15	42	15	133.9	DHX30	4.0003e+06	3.78835e+06	3.89432e+06	2.86777e+07	2.26507e+07	25664179	1.95705e+07	2.08147e+07	2.01926e+07	2.17699e+07	1.62983e+07
High	Master Protein	Q5VYK3	Proteasome adapter and scaffold protein ECM29 OS=Homo sapiens OX=9606 GN=ECPAS PE=1 SV=2	16	22	42	22	204.2	ECPAS	412067	1.67611e+06	1.04409e+06	3.17336e+07	2.32864e+07	2.751e+07	1.68122e+07	1.27826e+07	1.47974e+07	2.64659e+07	1.37533e+07
High	Master Protein	P06748	Nucleophosmin OS=Homo sapiens OX=9606 GN=NPM1 PE=1 SV=2	33	8	42	8	32.6	NPM1	2.24177e+07	1.02377e+07	1.63277e+07	7.45167e+07	4.94225e+07	6.19696e+07	38835729	5.90465e+07	4.89411e+07	4.56419e+07	3.26134e+07
High	Master Protein	P42166	Lamina-associated polypeptide 2, isoform alpha OS=Homo sapiens OX=9606 GN=TMPO PE=1 SV=2	20	11	42	1	75.4	TMPO	873749	381764	627757	1.99288e+06	1.47636e+06	1.73462e+06	1.09261e+06	1.16053e+06	1.12657e+06	1.10686e+06	498813
High	Master Protein	Q14152	Eukaryotic translation initiation factor 3 subunit A OS=Homo sapiens OX=9606 GN=EIF3A PE=1 SV=1	14	14	42	14	166.5	EIF3A	20994543	1.66588e+07	1.88267e+07	1.94268e+07	1.47337e+07	1.70802e+07	1.56157e+07	1.56148e+07	1.56153e+07	-1.74644e+06	-3.21143e+06
High	Master Protein	P63151	Serine/threonine-protein phosphatase 2A 55 kDa regulatory subunit B alpha isoform OS=Homo sapiens OX=9606 GN=PPP2R2A PE=1 SV=1	38	12	42	8	51.7	PPP2R2A	1778681	410578	1.09463e+06	8.9987e+07	6.39756e+07	7.69813e+07	7.65e+07	8.36168e+07	8.00584e+07	7.58867e+07	7.89638e+07
High	Master Protein	O75694	Nuclear pore complex protein Nup155 OS=Homo sapiens OX=9606 GN=NUP155 PE=1 SV=1	16	15	41	15	155.1	NUP155	1.75423e+06	1.93495e+06	1.84459e+06	3.67048e+07	2.73137e+07	3.20093e+07	2.52015e+07	2.22804e+07	2.37409e+07	3.01647e+07	2.18963e+07
High	Master Protein	Q92499	ATP-dependent RNA helicase DDX1 OS=Homo sapiens OX=9606 GN=DDX1 PE=1 SV=2	20	12	41	12	82.4	DDX1	3.15693e+06	2.72918e+06	2.94305e+06	1.69858e+07	1.32967e+07	1.51413e+07	1.23083e+07	1.98093e+07	1.60588e+07	1.21982e+07	1.31158e+07
High	Master Protein	Q9UBV2	Protein sel-1 homolog 1 OS=Homo sapiens OX=9606 GN=SEL1L PE=1 SV=3	22	11	41	11	88.7	SEL1L	71124.8	88365.1	79745	5.27697e+07	4.00607e+07	4.64152e+07	3.92055e+07	5.06286e+07	4.49171e+07	4.63355e+07	4.48373e+07
High	Master Protein	P10321	HLA class I histocompatibility antigen, C alpha chain OS=Homo sapiens OX=9606 GN=HLA-C PE=1 SV=3	46	12	41	6	40.6	HLA-C	781221	231928	506574	6.01989e+07	4.21559e+07	5.11774e+07	3.71834e+07	3.92616e+07	3.82225e+07	5.06708e+07	3.77159e+07
High	Master Protein	Q8IXB1	DnaJ homolog subfamily C member 10 OS=Homo sapiens OX=9606 GN=DNAJC10 PE=1 SV=2	19	15	41	15	91	DNAJC10	2.11417e+06	1.00015e+06	1.55716e+06	3.82834e+07	2.67296e+07	3.25065e+07	2.35947e+07	3.68084e+07	3.02015e+07	3.09493e+07	2.86444e+07
High	Master Protein	Q9UH99	SUN domain-containing protein 2 OS=Homo sapiens OX=9606 GN=SUN2 PE=1 SV=3	31	16	41	15	80.3	SUN2	988536	419150	703843	4.74423e+07	4.12637e+07	4.4353e+07	3.47812e+07	3.9061e+07	3.69211e+07	4.36492e+07	3.62173e+07
High	Master Protein	P02786	Transferrin receptor protein 1 OS=Homo sapiens OX=9606 GN=TFRC PE=1 SV=2	26	16	41	16	84.8	TFRC	1.34909e+06	2.21896e+06	1.78402e+06	6.99192e+07	5.0796e+07	6.03576e+07	4.61317e+07	54058091	5.00949e+07	5.85736e+07	4.83109e+07
High	Master Protein	P63244	Small ribosomal subunit protein RACK1 OS=Homo sapiens OX=9606 GN=RACK1 PE=1 SV=3	51	13	41	13	35.1	RACK1	1.99558e+07	1.43167e+07	1.71362e+07	8.17338e+07	7.15669e+07	7.66504e+07	4.99074e+07	7.54308e+07	6.26691e+07	5.95142e+07	4.55329e+07
High	Master Protein	P49792	E3 SUMO-protein ligase RanBP2 OS=Homo sapiens OX=9606 GN=RANBP2 PE=1 SV=2	8	15	40	10	358	RANBP2	1.66324e+06	2.66877e+06	2.166e+06	1.02317e+07	9.05928e+06	9.64551e+06	5.98318e+06	5.64571e+06	5.81444e+06	7.47951e+06	3.64844e+06
High	Master Protein	Q9Y5M8	Signal recognition particle receptor subunit beta OS=Homo sapiens OX=9606 GN=SRPRB PE=1 SV=3	53	11	40	11	29.7	SRPRB	1.5118e+06	827332	1.16957e+06	4.78152e+07	4.11437e+07	4.44795e+07	3.61435e+07	4.72811e+07	4.17123e+07	4.33099e+07	4.05427e+07
High	Master Protein	P67775	Serine/threonine-protein phosphatase 2A catalytic subunit alpha isoform OS=Homo sapiens OX=9606 GN=PPP2CA PE=1 SV=1	45	11	40	9	35.6	PPP2CA	3.46093e+06	1.88981e+06	2.67537e+06	5.69476e+07	5.36565e+07	5.53021e+07	5.46488e+07	7.50649e+07	6.48568e+07	5.26267e+07	6.21815e+07
High	Master Protein	Q6IAN0	Dehydrogenase/reductase SDR family member 7B OS=Homo sapiens OX=9606 GN=DHRS7B PE=1 SV=2	42	12	40	12	35.1	DHRS7B	1.31194e+06	647177	979557	3.28928e+07	2.79968e+07	3.04448e+07	2.02174e+07	2.85808e+07	2.43991e+07	2.94653e+07	2.34196e+07
High	Master Protein	P54886	Delta-1-pyrroline-5-carboxylate synthase OS=Homo sapiens OX=9606 GN=ALDH18A1 PE=1 SV=2	19	14	40	14	87.2	ALDH18A1	2.01459e+06	2.85422e+06	2.43441e+06	2.09869e+07	1.1843e+07	1.64149e+07	1.23668e+07	1.35792e+07	1.2973e+07	1.39805e+07	1.05386e+07
High	Master Protein	O95573	Fatty acid CoA ligase Acsl3 OS=Homo sapiens OX=9606 GN=ACSL3 PE=1 SV=3	25	14	40	14	80.4	ACSL3	579999	397591	488795	3.81844e+07	3.34619e+07	3.58231e+07	2.94298e+07	3.17296e+07	3.05797e+07	3.53344e+07	3.00909e+07
High	Master Protein	Q13948	Protein CASP OS=Homo sapiens OX=9606 GN=CUX1 PE=1 SV=2	25	14	40	14	77.4	CUX1	530209	530393	530301	2.23368e+07	1.83522e+07	2.03445e+07	1.57768e+07	1.9163e+07	1.74699e+07	1.98142e+07	1.69396e+07
High	Master Protein	P30876	DNA-directed RNA polymerase II subunit RPB2 OS=Homo sapiens OX=9606 GN=POLR2B PE=1 SV=1	15	14	40	14	133.8	POLR2B	4.19148e+06	4.40368e+06	4.29758e+06	3.40021e+07	1.96501e+07	2.68261e+07	1.37953e+07	1.97935e+07	1.67944e+07	2.25285e+07	1.24968e+07
High	Master Protein	P30154	Serine/threonine-protein phosphatase 2A 65 kDa regulatory subunit A beta isoform OS=Homo sapiens OX=9606 GN=PPP2R1B PE=1 SV=3	22	11	39	5	66.2	PPP2R1B			#DIV/0!	5.68112e+06	5.43651e+06	5.55881e+06	4.08766e+06	4.19634e+06	4.142e+06	#DIV/0!	#DIV/0!
High	Master Protein	P51610	Host cell factor 1 OS=Homo sapiens OX=9606 GN=HCFC1 PE=1 SV=2	12	16	39	16	208.6	HCFC1	3.40483e+07	2.02977e+07	2.7173e+07	2.61186e+07	2.07757e+07	2.34472e+07	1.56544e+07	1.91561e+07	1.74053e+07	-3.72588e+06	-9.76776e+06
High	Master Protein	Q9H857	5'-nucleotidase domain-containing protein 2 OS=Homo sapiens OX=9606 GN=NT5DC2 PE=1 SV=1	28	11	39	11	60.7	NT5DC2	1.77692e+06	2.67036e+06	2.22364e+06	2.97094e+07	2.02662e+07	2.49878e+07	1.74159e+07	2.445e+07	2.09329e+07	2.27642e+07	1.87093e+07
High	Master Protein	O15294	UDP-N-acetylglucosamine--peptide N-acetylglucosaminyltransferase 110 kDa subunit OS=Homo sapiens OX=9606 GN=OGT PE=1 SV=3	18	15	39	15	116.9	OGT	5.56651e+06	3.51158e+06	4.53904e+06	2.76396e+07	2.15032e+07	2.45714e+07	1.62547e+07	1.76412e+07	1.6948e+07	2.00323e+07	1.24089e+07
High	Master Protein	Q96A33	PAT complex subunit CCDC47 OS=Homo sapiens OX=9606 GN=CCDC47 PE=1 SV=1	47	15	39	15	55.8	CCDC47	5.50895e+06	620134	3.06454e+06	4.93031e+07	4.32102e+07	4.62566e+07	3.69134e+07	3.91413e+07	3.80274e+07	4.31921e+07	3.49628e+07
High	Master Protein	P02545	Prelamin-A/C OS=Homo sapiens OX=9606 GN=LMNA PE=1 SV=1	19	14	39	12	74.1	LMNA	1.67647e+06	1.81869e+06	1.74758e+06	2.76467e+07	2.34958e+07	2.55712e+07	1.61546e+07	21480169	1.88174e+07	2.38236e+07	1.70698e+07
High	Master Protein	Q96BY7	Autophagy-related protein 2 homolog B OS=Homo sapiens OX=9606 GN=ATG2B PE=1 SV=5	11	17	39	17	232.6	ATG2B	987999	982311	985155	2.24859e+07	1.70825e+07	19784195	1.38374e+07	1.48983e+07	1.43678e+07	1.8799e+07	1.33827e+07
High	Master Protein	P60891	Ribose-phosphate pyrophosphokinase 1 OS=Homo sapiens OX=9606 GN=PRPS1 PE=1 SV=2	34	11	39	11	34.8	PRPS1	1.239e+07	5.29902e+06	8.84452e+06	7.27951e+07	5.67305e+07	6.47628e+07	4.38917e+07	6.23042e+07	5.30979e+07	5.59183e+07	4.42534e+07
High	Master Protein	Q9P2E9	Ribosome-binding protein 1 OS=Homo sapiens OX=9606 GN=RRBP1 PE=1 SV=5	17	19	39	19	152.4	RRBP1	2.58301e+08	1.31855e+08	1.95078e+08	3.11224e+08	2.97586e+08	3.04405e+08	2.01664e+08	2.17754e+08	2.09709e+08	1.09326e+08	1.4631e+07
High	Master Protein	Q9BSD7	Cancer-related nucleoside-triphosphatase OS=Homo sapiens OX=9606 GN=NTPCR PE=1 SV=1	61	9	39	9	20.7	NTPCR	5.30984e+06	4.12671e+06	4.71828e+06	1.27577e+08	9.69971e+07	1.12287e+08	8.45042e+07	9.96493e+07	9.20767e+07	1.07569e+08	8.73584e+07
High	Master Protein	Q14203	Dynactin subunit 1 OS=Homo sapiens OX=9606 GN=DCTN1 PE=1 SV=3	16	16	38	16	141.6	DCTN1	4.10046e+06	2.68602e+06	3.39324e+06	2.01573e+07	1.49256e+07	1.75415e+07	1.02884e+07	9.85318e+06	1.00708e+07	1.41483e+07	6.67756e+06
High	Master Protein	Q14318	Peptidyl-prolyl cis-trans isomerase FKBP8 OS=Homo sapiens OX=9606 GN=FKBP8 PE=1 SV=2	36	11	38	11	44.5	FKBP8	2.41304e+06	3.2485e+06	2.83077e+06	6.57681e+07	5.64965e+07	6.11323e+07	4.66252e+07	5.91289e+07	5.28771e+07	5.83015e+07	5.00463e+07
High	Master Protein	Q93008	Probable ubiquitin carboxyl-terminal hydrolase FAF-X OS=Homo sapiens OX=9606 GN=USP9X PE=1 SV=4	7	13	38	13	290.3	USP9X	558775	524446	541610	1.41105e+07	1.11464e+07	1.26285e+07	7.07533e+06	6.95263e+06	7.01398e+06	1.20869e+07	6.47237e+06
High	Master Protein	P04406	Glyceraldehyde-3-phosphate dehydrogenase OS=Homo sapiens OX=9606 GN=GAPDH PE=1 SV=3	50	13	38	13	36	GAPDH	3.40084e+07	1.59181e+07	2.49633e+07	5.24008e+07	3.90969e+07	4.57489e+07	2.21588e+07	3.07557e+07	2.64572e+07	2.07856e+07	1.49399e+06
High	Master Protein	Q9HCU5	Prolactin regulatory element-binding protein OS=Homo sapiens OX=9606 GN=PREB PE=1 SV=2	35	10	38	10	45.4	PREB	929631	578352	753992	4.74216e+07	4.16038e+07	4.45127e+07	3.35414e+07	4.39455e+07	3.87434e+07	4.37587e+07	3.79894e+07
High	Master Protein	P46781	Small ribosomal subunit protein uS4 OS=Homo sapiens OX=9606 GN=RPS9 PE=1 SV=3	30	9	38	9	22.6	RPS9	1.55883e+07	1.34587e+07	1.45235e+07	1.16428e+08	8.2354e+07	9.93912e+07	6.72577e+07	9.47889e+07	8.10233e+07	8.48678e+07	6.64998e+07
High	Master Protein	P28331	NADH-ubiquinone oxidoreductase 75 kDa subunit, mitochondrial OS=Homo sapiens OX=9606 GN=NDUFS1 PE=1 SV=3	28	13	37	13	79.4	NDUFS1	789521	530539	660030	2.08292e+07	2.08896e+07	2.08594e+07	19109817	2.15194e+07	2.03146e+07	2.01994e+07	1.96546e+07
High	Master Protein	P19367	Hexokinase-1 OS=Homo sapiens OX=9606 GN=HK1 PE=1 SV=3	11	10	37	6	102.4	HK1	349761	959729	654745	2.06326e+07	1.75097e+07	1.90711e+07	1.62354e+07	1.77349e+07	1.69851e+07	1.84164e+07	1.63304e+07
High	Master Protein	Q14739	Delta(14)-sterol reductase LBR OS=Homo sapiens OX=9606 GN=LBR PE=1 SV=2	14	10	37	10	70.7	LBR	1.86886e+06	1.35508e+06	1.61197e+06	1.00176e+08	7.13268e+07	8.57515e+07	5.61235e+07	6.85525e+07	6.2338e+07	8.41395e+07	6.0726e+07
High	Master Protein	P52948	Nuclear pore complex protein Nup98-Nup96 OS=Homo sapiens OX=9606 GN=NUP98 PE=1 SV=4	9	14	37	14	197.5	NUP98	431390	509945	470668	2.87978e+07	2.35452e+07	2.61715e+07	2.5513e+07	2.61919e+07	2.58525e+07	2.57009e+07	2.53818e+07
High	Master Protein	Q9Y3I0	RNA-splicing ligase RtcB homolog OS=Homo sapiens OX=9606 GN=RTCB PE=1 SV=1	28	11	37	11	55.2	RTCB	8.8522e+06	5.70576e+06	7.27898e+06	3.03395e+07	2.58022e+07	2.80709e+07	1.83609e+07	2.231e+07	2.03355e+07	2.07919e+07	1.30565e+07
High	Master Protein	P62333	26S proteasome regulatory subunit 10B OS=Homo sapiens OX=9606 GN=PSMC6 PE=1 SV=1	50	15	37	15	44.1	PSMC6	1713360	926552	1.31996e+06	4.6607e+07	3.80141e+07	4.23105e+07	3.13975e+07	4.04731e+07	3.59353e+07	4.09906e+07	3.46154e+07
High	Master Protein	P21796	Voltage-dependent anion-selective channel protein 1 OS=Homo sapiens OX=9606 GN=VDAC1 PE=1 SV=2	53	11	37	10	30.8	VDAC1	4.41719e+06	2.84196e+06	3.62957e+06	8.36457e+07	5.81997e+07	7.09227e+07	4.95583e+07	7.5034e+07	62296160	6.72931e+07	5.86666e+07
High	Master Protein	P43307	Translocon-associated protein subunit alpha OS=Homo sapiens OX=9606 GN=SSR1 PE=1 SV=3	12	5	37	5	32.2	SSR1	8.72691e+06	7.10756e+06	7.91724e+06	3.8461e+08	2.35605e+08	3.10108e+08	2.76087e+08	3.21044e+08	298565032	3.02191e+08	2.90648e+08
High	Master Protein	P48444	Coatomer subunit delta OS=Homo sapiens OX=9606 GN=ARCN1 PE=1 SV=1	19	10	37	10	57.2	ARCN1	6.94452e+06	4.78719e+06	5.86585e+06	2.57763e+07	2.47967e+07	2.52865e+07	2.35516e+07	2.93355e+07	2.64435e+07	1.94207e+07	2.05777e+07
High	Master Protein	P0DP25	Calmodulin-3 OS=Homo sapiens OX=9606 GN=CALM3 PE=1 SV=1	33	8	37	8	16.8	CALM3	2.39156e+07	1.29489e+07	1.84322e+07	5.31735e+07	3.35295e+07	4.33515e+07	1.61175e+07	2.4395e+07	2.02563e+07	2.49193e+07	1.82404e+06
High	Master Protein	P62140	Serine/threonine-protein phosphatase PP1-beta catalytic subunit OS=Homo sapiens OX=9606 GN=PPP1CB PE=1 SV=3	38	11	37	3	37.2	PPP1CB	2.25292e+06	783429	1.51817e+06	7.76116e+06	6.36518e+06	7.06317e+06	5.42568e+06	6.89847e+06	6.16207e+06	5.545e+06	4.6439e+06
High	Master Protein	P35613	Basigin OS=Homo sapiens OX=9606 GN=BSG PE=1 SV=2	26	8	37	8	42.2	BSG	1.21576e+07	6.0156e+06	9.0866e+06	1.75535e+08	1.41712e+08	1.58624e+08	1.21514e+08	1.39977e+08	1.30745e+08	1.49537e+08	1.21659e+08
High	Master Protein	Q15293	Reticulocalbin-1 OS=Homo sapiens OX=9606 GN=RCN1 PE=1 SV=1	39	12	37	12	38.9	RCN1	521817	138922	330370	6.39067e+07	3.59335e+07	4.99201e+07	3.2771e+07	4.38697e+07	3.83204e+07	4.95897e+07	3.799e+07
High	Master Protein	Q04721	Neurogenic locus notch homolog protein 2 OS=Homo sapiens OX=9606 GN=NOTCH2 PE=1 SV=3	8	14	37	14	265.2	NOTCH2	297567	198065	247816	1.65616e+07	1.13833e+07	1.39725e+07	9.54736e+06	1.08046e+07	1.0176e+07	1.37247e+07	9.92815e+06
High	Master Protein	Q8NBM4	Ubiquitin-associated domain-containing protein 2 OS=Homo sapiens OX=9606 GN=UBAC2 PE=1 SV=1	34	9	36	9	38.9	UBAC2	627988	628296	628142	8.50083e+07	6.1941e+07	7.34746e+07	4.41049e+07	4.90811e+07	4.6593e+07	7.28465e+07	4.59649e+07
High	Master Protein	O43390	Heterogeneous nuclear ribonucleoprotein R OS=Homo sapiens OX=9606 GN=HNRNPR PE=1 SV=1	12	7	36	4	70.9	HNRNPR	1.55687e+06	1.8575e+06	1.70719e+06	11169469	11528535	11349002	7.67408e+06	9.41359e+06	8.54383e+06	9.64181e+06	6.83665e+06
High	Master Protein	P35221	Catenin alpha-1 OS=Homo sapiens OX=9606 GN=CTNNA1 PE=1 SV=1	16	12	36	12	100	CTNNA1	797129	675750	736439	3.02146e+07	22713008	2.64638e+07	1.80518e+07	2.42523e+07	2.11521e+07	2.57273e+07	2.04156e+07
High	Master Protein	P55209	Nucleosome assembly protein 1-like 1 OS=Homo sapiens OX=9606 GN=NAP1L1 PE=1 SV=1	26	10	36	8	45.3	NAP1L1	6.57862e+06	2.48329e+06	4.53096e+06	5.04132e+07	4.38906e+07	4.71519e+07	3.5338e+07	4.73333e+07	4.13357e+07	4.26209e+07	3.68047e+07
High	Master Protein	Q96N67	Dedicator of cytokinesis protein 7 OS=Homo sapiens OX=9606 GN=DOCK7 PE=1 SV=4	9	16	36	15	242.4	DOCK7	5.47938e+06	5.83379e+06	5.65658e+06	2.16616e+07	1.45985e+07	1.813e+07	1.0851e+07	1.0158e+07	1.05045e+07	1.24735e+07	4.84792e+06
High	Master Protein	P62136	Serine/threonine-protein phosphatase PP1-alpha catalytic subunit OS=Homo sapiens OX=9606 GN=PPP1CA PE=1 SV=1	39	12	36	4	37.5	PPP1CA	7.91608e+06	4.14055e+06	6.02832e+06	4.03494e+07	3.54872e+07	3.79183e+07	2.25621e+07	3.29378e+07	27749916	3.189e+07	2.17216e+07
High	Master Protein	Q6P1M0	Long-chain fatty acid transport protein 4 OS=Homo sapiens OX=9606 GN=SLC27A4 PE=1 SV=1	28	15	36	15	72	SLC27A4	433973	1.03361e+06	733793	2.00546e+07	1.94749e+07	1.97648e+07	1.74118e+07	1.9427e+07	1.84194e+07	1.9031e+07	1.76856e+07
High	Master Protein	P46782	Small ribosomal subunit protein uS7 OS=Homo sapiens OX=9606 GN=RPS5 PE=1 SV=4	52	10	36	10	22.9	RPS5	1.08495e+07	7.77436e+06	9.31192e+06	6.63208e+07	6.87735e+07	6.75471e+07	6.42273e+07	6.32916e+07	6.37594e+07	5.82352e+07	5.44475e+07
High	Master Protein	Q9H936	Mitochondrial glutamate carrier 1 OS=Homo sapiens OX=9606 GN=SLC25A22 PE=1 SV=1	48	11	36	7	34.4	SLC25A22	4.59243e+06	3.06294e+06	3.82768e+06	1.09754e+08	9.69236e+07	1.03339e+08	6.51358e+07	81119137	7.31275e+07	9.95112e+07	6.92998e+07
High	Master Protein	Q9NYU2	UDP-glucose:glycoprotein glucosyltransferase 1 OS=Homo sapiens OX=9606 GN=UGGT1 PE=1 SV=3	14	16	36	16	177.1	UGGT1	1.62064e+06	934126	1.27738e+06	34990088	2.09407e+07	2.79654e+07	2.23656e+07	2.40874e+07	2.32265e+07	2.6688e+07	2.19491e+07
High	Master Protein	Q15208	Serine/threonine-protein kinase 38 OS=Homo sapiens OX=9606 GN=STK38 PE=1 SV=1	31	13	36	12	54.2	STK38		491514	491514	5.86489e+07	54270394	5.64597e+07	3.32747e+07	4.33804e+07	3.83276e+07	5.59682e+07	3.78361e+07
High	Master Protein	Q9NZ01	Very-long-chain enoyl-CoA reductase OS=Homo sapiens OX=9606 GN=TECR PE=1 SV=1	31	12	36	12	36	TECR	1.22384e+07	8.88101e+06	1.05597e+07	2.61845e+08	164520946	2.13183e+08	1.27357e+08	1.68822e+08	1.48089e+08	2.02623e+08	1.3753e+08
High	Master Protein	Q9H0D6	5'-3' exoribonuclease 2 OS=Homo sapiens OX=9606 GN=XRN2 PE=1 SV=1	14	10	36	10	108.5	XRN2	7.61043e+06	2.81706e+06	5.21375e+06	2.29068e+07	1.52429e+07	1.90749e+07	1.47221e+07	1.88758e+07	1.67989e+07	1.38611e+07	1.15852e+07
High	Master Protein	Q00341	Vigilin OS=Homo sapiens OX=9606 GN=HDLBP PE=1 SV=2	20	19	35	19	141.4		4.22353e+07	3.2021e+07	3.71282e+07	2.60707e+06	2.00024e+06	2.30365e+06	2.29588e+06	2.97918e+06	2.63753e+06	-3.48245e+07	-3.44906e+07
High	Master Protein	P01889	HLA class I histocompatibility antigen, B alpha chain OS=Homo sapiens OX=9606 GN=HLA-B PE=1 SV=3	39	10	35	4	40.4	HLA-B	768146		768146	1.49214e+07	2.02579e+07	17589675	9.86586e+06	1.12616e+07	1.05637e+07	1.68215e+07	9.79557e+06
High	Master Protein	Q9UKV5	E3 ubiquitin-protein ligase AMFR OS=Homo sapiens OX=9606 GN=AMFR PE=1 SV=2	29	10	35	10	72.9	AMFR	215676	204477	210077	3.69217e+07	2.75176e+07	3.22197e+07	1.92935e+07	1.93993e+07	1.93464e+07	3.20096e+07	1.91363e+07
High	Master Protein	Q9NXW2	DnaJ homolog subfamily B member 12 OS=Homo sapiens OX=9606 GN=DNAJB12 PE=1 SV=5	29	10	35	9	41.8	DNAJB12	527773	474995	501384	1.53027e+07	1.31381e+07	1.42204e+07	7.97525e+06	1.41254e+07	1.10503e+07	1.3719e+07	1.0549e+07
High	Master Protein	P22102	Trifunctional purine biosynthetic protein adenosine-3 OS=Homo sapiens OX=9606 GN=GART PE=1 SV=1	22	15	35	15	107.7	GART	4.37621e+06	3.04954e+06	3.71288e+06	2.47959e+07	2.01791e+07	2.24875e+07	1.63472e+07	1.70286e+07	1.66879e+07	1.87746e+07	1.2975e+07
High	Master Protein	P08240	Signal recognition particle receptor subunit alpha OS=Homo sapiens OX=9606 GN=SRPRA PE=1 SV=2	24	11	35	11	69.8	SRPRA	588204	588985	588595	1.4948e+07	1.60185e+07	1.54833e+07	1.42479e+07	1.80037e+07	1.61258e+07	1.48947e+07	1.55372e+07
High	Master Protein	Q9Y6D6	Brefeldin A-inhibited guanine nucleotide-exchange protein 1 OS=Homo sapiens OX=9606 GN=ARFGEF1 PE=1 SV=2	8	12	35	8	208.6	ARFGEF1	41647.3	225799	133723	2.3119e+07	2.39277e+07	2.35234e+07	1.70011e+07	1.45102e+07	1.57557e+07	2.33897e+07	1.5622e+07
High	Master Protein	O43156	TELO2-interacting protein 1 homolog OS=Homo sapiens OX=9606 GN=TTI1 PE=1 SV=3	19	15	35	15	122	TTI1	2.29302e+06	2.15051e+06	2.22177e+06	37494190	2.93153e+07	3.34047e+07	22309233	2.43705e+07	2.33399e+07	3.1183e+07	2.11181e+07
High	Master Protein	Q9P2R3	Rabankyrin-5 OS=Homo sapiens OX=9606 GN=ANKFY1 PE=1 SV=2	16	13	35	13	128.3	ANKFY1	196157	468025	332091	2.20797e+07	1.80667e+07	2.00732e+07	1.61567e+07	1.90748e+07	1.76157e+07	1.97411e+07	1.72837e+07
High	Master Protein	O43852	Calumenin OS=Homo sapiens OX=9606 GN=CALU PE=1 SV=2	41	14	35	14	37.1	CALU	1.94493e+06	1.08601e+06	1.51547e+06	1.07792e+08	5.51194e+07	8.14557e+07	6.06838e+07	8.10244e+07	7.08541e+07	7.99402e+07	6.93386e+07
High	Master Protein	Q14683	Structural maintenance of chromosomes protein 1A OS=Homo sapiens OX=9606 GN=SMC1A PE=1 SV=2	14	15	34	15	143.1	SMC1A	4.35692e+06	2.32372e+06	3.34032e+06	3.54316e+07	1.67841e+07	2.61078e+07	1.88864e+07	2.10734e+07	1.99799e+07	2.27675e+07	1.66396e+07
High	Master Protein	Q7Z2W4	Zinc finger CCCH-type antiviral protein 1 OS=Homo sapiens OX=9606 GN=ZC3HAV1 PE=1 SV=3	15	10	34	10	101.4	ZC3HAV1	1.01287e+07	7.95922e+06	9.04397e+06	2.83997e+07	19692925	2.40463e+07	1.65156e+07	2.04228e+07	1.84692e+07	1.50023e+07	9.42521e+06
High	Master Protein	Q07864	DNA polymerase epsilon catalytic subunit A OS=Homo sapiens OX=9606 GN=POLE PE=1 SV=5	7	13	34	13	261.4	POLE	52326.6	57166.9	54746.8	1.6271e+07	1.12716e+07	1.37713e+07	6.95102e+06	5.62014e+06	6.28558e+06	1.37165e+07	6.23083e+06
High	Master Protein	P31946	14-3-3 protein beta/alpha OS=Homo sapiens OX=9606 GN=YWHAB PE=1 SV=3	35	8	34	2	28.1	YWHAB	1.48981e+06	684043	1.08693e+06	5.32313e+06	3.28351e+06	4.30332e+06	2.27336e+06	3.47924e+06	2.8763e+06	3.21639e+06	1.78937e+06
High	Master Protein	Q86YZ3	Hornerin OS=Homo sapiens OX=9606 GN=HRNR PE=1 SV=2	18	16	34	16	282.2	HRNR	3.17742e+06	5.02721e+06	4.10231e+06	806242	628192	717217	1.51859e+06	961359	1.23997e+06	-3.3851e+06	-2.86234e+06
High	Master Protein	O43251	RNA binding protein fox-1 homolog 2 OS=Homo sapiens OX=9606 GN=RBFOX2 PE=1 SV=3	31	11	34	11	41.3	RBFOX2	1.32733e+06	177308	752317	6.18244e+07	5.89147e+07	6.03696e+07	4.19534e+07	5.27339e+07	4.73436e+07	5.96173e+07	4.65913e+07
High	Master Protein	Q8TC07	TBC1 domain family member 15 OS=Homo sapiens OX=9606 GN=TBC1D15 PE=1 SV=2	20	13	34	13	79.4	TBC1D15	2.37288e+06	1.25149e+06	1.81219e+06	1.99334e+07	1.75039e+07	1.87187e+07	2.14955e+07	23386280	2.24409e+07	1.69065e+07	2.06287e+07
High	Master Protein	P55036	26S proteasome non-ATPase regulatory subunit 4 OS=Homo sapiens OX=9606 GN=PSMD4 PE=1 SV=1	33	9	34	9	40.7	PSMD4	8.02985e+06	6.48691e+06	7.25838e+06	2.37137e+07	3.10584e+07	2.73861e+07	2.19193e+07	2.82237e+07	2.50715e+07	2.01277e+07	1.78131e+07
High	Master Protein	Q6P4A7	Sideroflexin-4 OS=Homo sapiens OX=9606 GN=SFXN4 PE=1 SV=1	48	11	34	11	38	SFXN4	2.75365e+06	1.81955e+06	2.2866e+06	1.08825e+08	8.58875e+07	9.73564e+07	7.33331e+07	8.29691e+07	7.81511e+07	9.50698e+07	7.58645e+07
High	Master Protein	P18085	ADP-ribosylation factor 4 OS=Homo sapiens OX=9606 GN=ARF4 PE=1 SV=3	47	6	34	3	20.5	ARF4	2.08177e+06	1.95039e+06	2.01608e+06	3.7873e+07	2.55657e+07	3.17194e+07	2.33385e+07	2.72086e+07	2.52736e+07	2.97033e+07	2.32575e+07
High	Master Protein	P50748	Kinetochore-associated protein 1 OS=Homo sapiens OX=9606 GN=KNTC1 PE=1 SV=1	9	16	34	16	250.6	KNTC1			#DIV/0!	2.77829e+07	2.33912e+07	2.5587e+07	1.60789e+07	1.54997e+07	1.57893e+07	#DIV/0!	#DIV/0!
High	Master Protein	A1L0T0	2-hydroxyacyl-CoA lyase 2 OS=Homo sapiens OX=9606 GN=ILVBL PE=1 SV=2	33	12	34	12	67.8	ILVBL	1.35144e+06	767085	1.05926e+06	3.11823e+07	3.11556e+07	3.11689e+07	2.33289e+07	2.96979e+07	2.65134e+07	3.01097e+07	2.54541e+07
High	Master Protein	Q13162	Peroxiredoxin-4 OS=Homo sapiens OX=9606 GN=PRDX4 PE=1 SV=1	25	7	34	4	30.5	PRDX4	3.30941e+06	2.25085e+06	2.78013e+06	1.22344e+07	8.5791e+06	1.04067e+07	6.76006e+06	9065765	7.91291e+06	7.62661e+06	5.13278e+06
High	Master Protein	Q9UBW7	Zinc finger MYM-type protein 2 OS=Homo sapiens OX=9606 GN=ZMYM2 PE=1 SV=1	11	13	34	13	154.8	ZMYM2	1.1845e+06		1.1845e+06	2.33373e+07	1.4016e+07	1.86767e+07	1.51595e+07	1.50659e+07	1.51127e+07	1.74922e+07	1.39282e+07
High	Master Protein	P78347	General transcription factor II-I OS=Homo sapiens OX=9606 GN=GTF2I PE=1 SV=2	16	11	34	11	112.3	GTF2I	2.75831e+06	3.78073e+06	3.26952e+06	2.61534e+07	1.43326e+07	2.0243e+07	1.60437e+07	1.90422e+07	1.75429e+07	1.69735e+07	1.42734e+07
High	Master Protein	Q9H845	Complex I assembly factor ACAD9, mitochondrial OS=Homo sapiens OX=9606 GN=ACAD9 PE=1 SV=1	30	15	34	15	68.7	ACAD9	2.44912e+06	1.75481e+06	2.10196e+06	2.06475e+07	1.63694e+07	1.85085e+07	1.45301e+07	1.87258e+07	1.6628e+07	1.64065e+07	1.4526e+07
High	Master Protein	Q15084	Protein disulfide-isomerase A6 OS=Homo sapiens OX=9606 GN=PDIA6 PE=1 SV=1	25	9	34	9	48.1	PDIA6	16030858	1.10463e+07	1.35386e+07	6.20535e+07	5.1961e+07	5.70072e+07	3.58823e+07	4.23873e+07	3.91348e+07	4.34686e+07	2.55962e+07
High	Master Protein	Q08211	ATP-dependent RNA helicase A OS=Homo sapiens OX=9606 GN=DHX9 PE=1 SV=4	15	15	34	15	140.9	DHX9	6.67135e+06	5.3197e+06	5.99552e+06	2.72505e+07	1.75092e+07	2.23798e+07	1.23284e+07	1.6478e+07	14403194	1.63843e+07	8.40767e+06
High	Master Protein	Q15750	TGF-beta-activated kinase 1 and MAP3K7-binding protein 1 OS=Homo sapiens OX=9606 GN=TAB1 PE=1 SV=1	31	9	33	9	54.6	TAB1	1.02933e+07	6.21171e+06	8.25253e+06	2.49112e+07	3.42185e+07	2.95649e+07	1.81155e+07	1.7538e+07	1.78268e+07	2.13123e+07	9.57422e+06
High	Master Protein	Q9BT22	Chitobiosyldiphosphodolichol beta-mannosyltransferase OS=Homo sapiens OX=9606 GN=ALG1 PE=1 SV=2	21	10	33	10	52.5	ALG1	1.28855e+06	577137	932843	1.07959e+08	74710379	9.13347e+07	5.46794e+07	7.0551e+07	6.26152e+07	9.04018e+07	6.16823e+07
High	Master Protein	Q9BW27	Nuclear pore complex protein Nup85 OS=Homo sapiens OX=9606 GN=NUP85 PE=1 SV=1	21	11	33	11	75	NUP85	321223	426620	373922	1.99242e+07	1.83895e+07	1.91568e+07	1.9982e+07	2.39249e+07	2.19534e+07	1.87829e+07	2.15795e+07
High	Master Protein	Q8TCJ2	Dolichyl-diphosphooligosaccharide--protein glycosyltransferase subunit STT3B OS=Homo sapiens OX=9606 GN=STT3B PE=1 SV=1	15	12	33	12	93.6	STT3B	404390		404390	3.96663e+07	2.73419e+07	3.35041e+07	2.31853e+07	2.66548e+07	2.492e+07	3.30997e+07	2.45157e+07
High	Master Protein	P19474	E3 ubiquitin-protein ligase TRIM21 OS=Homo sapiens OX=9606 GN=TRIM21 PE=1 SV=1	29	11	33	11	54.1	TRIM21	3.7354e+07	1.89242e+07	2.81391e+07	6.68718e+07	5.90678e+07	6.29698e+07	53266030	6.40321e+07	5.86491e+07	3.48307e+07	3.05099e+07
High	Master Protein	O00231	26S proteasome non-ATPase regulatory subunit 11 OS=Homo sapiens OX=9606 GN=PSMD11 PE=1 SV=3	29	12	33	12	47.4	PSMD11	2.36644e+06	2.68644e+06	2.52644e+06	5.49411e+07	4.36104e+07	4.92757e+07	3.4618e+07	4.34813e+07	3.90497e+07	4.67493e+07	3.65232e+07
High	Master Protein	P62424	Large ribosomal subunit protein eL8 OS=Homo sapiens OX=9606 GN=RPL7A PE=1 SV=2	37	10	33	10	30	RPL7A	1.29024e+07	1.10529e+07	1.19777e+07	7.03053e+07	6.62932e+07	6.82992e+07	4.51756e+07	8.17158e+07	6.34457e+07	5.63215e+07	5.1468e+07
High	Master Protein	Q9Y5A9	YTH domain-containing family protein 2 OS=Homo sapiens OX=9606 GN=YTHDF2 PE=1 SV=2	18	9	33	7	62.3	YTHDF2	2.88418e+06	2.12954e+06	2.50686e+06	6.16653e+07	55740342	5.87028e+07	4.89605e+07	5.39112e+07	5.14359e+07	5.6196e+07	4.8929e+07
High	Master Protein	P08754	Guanine nucleotide-binding protein G(i) subunit alpha-3 OS=Homo sapiens OX=9606 GN=GNAI3 PE=1 SV=3	39	12	33	7	40.5	GNAI3	7.32123e+06	6.15968e+06	6.74045e+06	4.46661e+07	3.03764e+07	3.75212e+07	2.27043e+07	3.02473e+07	2.64758e+07	3.07808e+07	1.97353e+07
High	Master Protein	Q13148	TAR DNA-binding protein 43 OS=Homo sapiens OX=9606 GN=TARDBP PE=1 SV=1	40	11	33	11	44.7	TARDBP	2.63772e+06	1.62752e+06	2.13262e+06	3.7923e+07	3.38712e+07	3.58971e+07	2.87396e+07	3.31108e+07	3.09252e+07	3.37644e+07	2.87926e+07
High	Master Protein	P61204	ADP-ribosylation factor 3 OS=Homo sapiens OX=9606 GN=ARF3 PE=1 SV=2	64	8	32	5	20.6	ARF3	6.46466e+06	6.51106e+06	6.48786e+06	5.54781e+07	3.57172e+07	4.55977e+07	3.00469e+07	3.45984e+07	3.23226e+07	3.91098e+07	2.58348e+07
High	Master Protein	P04792	Heat shock protein beta-1 OS=Homo sapiens OX=9606 GN=HSPB1 PE=1 SV=2	62	9	32	9	22.8	HSPB1	3.3089e+07	2.36795e+07	2.83843e+07	8.51518e+07	4.72953e+07	6.62236e+07	3.89455e+07	5.04664e+07	4.47059e+07	3.78393e+07	1.63216e+07
High	Master Protein	P04049	RAF proto-oncogene serine/threonine-protein kinase OS=Homo sapiens OX=9606 GN=RAF1 PE=1 SV=1	31	14	32	11	73	RAF1	2.17519e+06	2.40196e+06	2.28857e+06	3.89004e+07	3.41816e+07	3.6541e+07	2.65857e+07	3.05832e+07	2.85845e+07	3.42524e+07	2.62959e+07
High	Master Protein	Q5JWF2	Guanine nucleotide-binding protein G(s) subunit alpha isoforms XLas OS=Homo sapiens OX=9606 GN=GNAS PE=1 SV=2	8	8	32	7	111	GNAS	3.87705e+06	2.68816e+06	3.28261e+06	2.03609e+07	1.38519e+07	1.71064e+07	1.37996e+07	1.55678e+07	1.46837e+07	1.38238e+07	1.14011e+07
High	Master Protein	Q9Y312	Protein AAR2 homolog OS=Homo sapiens OX=9606 GN=AAR2 PE=1 SV=2	35	9	32	9	43.4	AAR2	819566	76313.5	447940	1.95301e+07	1.59932e+07	1.77616e+07	1.62483e+07	1.62923e+07	1.62703e+07	1.73137e+07	1.58224e+07
High	Master Protein	P09874	Poly [ADP-ribose] polymerase 1 OS=Homo sapiens OX=9606 GN=PARP1 PE=1 SV=4	15	12	32	12	113	PARP1	1.27909e+07	1.22193e+07	1.25051e+07	3.38823e+07	2.15371e+07	2.77097e+07	1.90706e+07	2.52669e+07	2.21687e+07	1.52046e+07	9.66367e+06
High	Master Protein	Q12797	Aspartyl/asparaginyl beta-hydroxylase OS=Homo sapiens OX=9606 GN=ASPH PE=1 SV=3	25	14	32	14	85.8	ASPH	4.28517e+06	2.65954e+06	3.47236e+06	2.75522e+07	1.95956e+07	2.35739e+07	2.2199e+07	2.59645e+07	2.40817e+07	2.01015e+07	2.06094e+07
High	Master Protein	O60814	Histone H2B type 1-K OS=Homo sapiens OX=9606 GN=H2BC12 PE=1 SV=3	40	5	32	5	13.9	H2BC12	2.77071e+07	2.35772e+07	2.56422e+07	6.54643e+07	4.36012e+07	5.45327e+07	4.38128e+07	4.14968e+07	4.26548e+07	2.88905e+07	1.70126e+07
High	Master Protein	P67809	Y-box-binding protein 1 OS=Homo sapiens OX=9606 GN=YBX1 PE=1 SV=3	52	11	32	8	35.9	YBX1	2.01675e+06	368278	1.19251e+06	1.85381e+07	1.6036e+07	1.7287e+07	1.14988e+07	1.59215e+07	1.37102e+07	1.60945e+07	1.25176e+07
High	Master Protein	Q92604	Acyl-CoA:lysophosphatidylglycerol acyltransferase 1 OS=Homo sapiens OX=9606 GN=LPGAT1 PE=1 SV=1	24	8	32	8	43.1	LPGAT1		98161.1	98161.1	1.78589e+07	1.24064e+07	1.51326e+07	9.36872e+06	1.29311e+07	1.11499e+07	1.50345e+07	1.10517e+07
High	Master Protein	O94905	Erlin-2 OS=Homo sapiens OX=9606 GN=ERLIN2 PE=1 SV=1	42	11	32	8	37.8	ERLIN2	565994	293989	429991	2.72694e+07	1.6968e+07	2.21187e+07	2.66632e+07	3.39156e+07	3.02894e+07	2.16887e+07	2.98594e+07
High	Master Protein	O60762	Dolichol-phosphate mannosyltransferase subunit 1 OS=Homo sapiens OX=9606 GN=DPM1 PE=1 SV=1	42	10	32	10	29.6	DPM1	8.32661e+06	7.92411e+06	8.12536e+06	2.03364e+08	1.29265e+08	1.66314e+08	9.90198e+07	1.46987e+08	1.23004e+08	1.58189e+08	1.14878e+08
High	Master Protein	O00743	Serine/threonine-protein phosphatase 6 catalytic subunit OS=Homo sapiens OX=9606 GN=PPP6C PE=1 SV=1	53	12	32	12	35.1	PPP6C	3.76115e+06	2.00593e+06	2.88354e+06	5.81292e+07	4.22573e+07	5.01933e+07	3.79405e+07	5.33692e+07	4.56549e+07	4.73097e+07	4.27713e+07
High	Master Protein	Q9UNM6	26S proteasome non-ATPase regulatory subunit 13 OS=Homo sapiens OX=9606 GN=PSMD13 PE=1 SV=2	34	10	32	10	42.9	PSMD13	2.2348e+06	1.5232e+06	1.879e+06	3.3051e+07	2.54984e+07	2.92747e+07	1.84553e+07	2.73789e+07	2.29171e+07	2.73957e+07	2.10381e+07
High	Master Protein	P61247	Small ribosomal subunit protein eS1 OS=Homo sapiens OX=9606 GN=RPS3A PE=1 SV=2	47	12	32	12	29.9	RPS3A	1.20631e+07	6.71355e+06	9.38834e+06	5.90799e+07	5.11872e+07	5.51335e+07	3.34864e+07	5.17313e+07	4.26089e+07	4.57452e+07	3.32205e+07
High	Master Protein	O15270	Serine palmitoyltransferase 2 OS=Homo sapiens OX=9606 GN=SPTLC2 PE=1 SV=1	26	10	32	10	62.9	SPTLC2		158913	158913	1.94103e+07	1.95543e+07	1.94823e+07	1.57236e+07	1.81972e+07	1.69604e+07	1.93234e+07	16801498
High	Master Protein	Q9NVH1	DnaJ homolog subfamily C member 11 OS=Homo sapiens OX=9606 GN=DNAJC11 PE=1 SV=2	25	11	32	11	63.2	DNAJC11	400442	631518	515980	1.34352e+07	1.29075e+07	1.31713e+07	1.05607e+07	1.36794e+07	1.21201e+07	1.26553e+07	1.16041e+07
High	Master Protein	P62191	26S proteasome regulatory subunit 4 OS=Homo sapiens OX=9606 GN=PSMC1 PE=1 SV=1	23	9	32	8	49.2	PSMC1	2.33029e+06	1.71965e+06	2.02497e+06	4.27549e+07	3.34915e+07	3.81232e+07	2.72274e+07	3.3716e+07	3.04717e+07	3.60982e+07	2.84467e+07
High	Master Protein	P40616	ADP-ribosylation factor-like protein 1 OS=Homo sapiens OX=9606 GN=ARL1 PE=1 SV=1	43	6	32	6	20.4	ARL1	2.23644e+06	1.2796e+06	1.75802e+06	5.58726e+07	3.1341e+07	4.36068e+07	3.11034e+07	3.49992e+07	3.30513e+07	4.18488e+07	3.12933e+07
High	Master Protein	Q14315	Filamin-C OS=Homo sapiens OX=9606 GN=FLNC PE=1 SV=3	6	14	32	9	290.8	FLNC	4.31937e+06	3.43125e+06	3.87531e+06	4.84387e+06	3.81282e+06	4.32834e+06	2.46555e+06	2.61784e+06	2.5417e+06	453033	-1.33362e+06
High	Master Protein	Q9Y4W2	Ribosomal biogenesis protein LAS1L OS=Homo sapiens OX=9606 GN=LAS1L PE=1 SV=2	26	12	32	12	83	LAS1L	767497	895317	831407	2.63454e+07	2.1714e+07	2.40297e+07	1.93603e+07	2.02856e+07	1.9823e+07	2.31983e+07	1.89916e+07
High	Master Protein	P04075	Fructose-bisphosphate aldolase A OS=Homo sapiens OX=9606 GN=ALDOA PE=1 SV=2	21	6	31	6	39.4	ALDOA	9.47431e+06	4.52289e+06	6.9986e+06	1.00465e+07	1.24028e+07	1.12247e+07	6.08682e+06	7.62045e+06	6.85363e+06	4.22606e+06	-144967
High	Master Protein	Q9BQA1	Methylosome protein WDR77 OS=Homo sapiens OX=9606 GN=WDR77 PE=1 SV=1	35	10	31	10	36.7	WDR77	679422	398115	538768	8.62822e+07	7.71105e+07	8.16963e+07	5.21791e+07	6.51493e+07	5.86642e+07	8.11576e+07	5.81254e+07
High	Master Protein	O94829	Importin-13 OS=Homo sapiens OX=9606 GN=IPO13 PE=1 SV=3	19	12	31	12	108.1	IPO13	441231	281708	361470	3.28144e+07	2.55486e+07	2.91815e+07	2.35042e+07	2.51493e+07	24326755	2.882e+07	2.39653e+07
High	Master Protein	Q9H078	Mitochondrial disaggregase OS=Homo sapiens OX=9606 GN=CLPB PE=1 SV=1	25	14	31	14	78.7	CLPB	505140	488780	496960	32183857	3.91312e+07	3.56575e+07	2.14044e+07	2.57762e+07	2.35903e+07	3.51606e+07	2.30933e+07
High	Master Protein	Q15046	Lysine--tRNA ligase OS=Homo sapiens OX=9606 GN=KARS1 PE=1 SV=3	19	10	31	10	68	KARS1	8.00759e+06	5.74611e+06	6.87685e+06	2.35268e+07	2.06444e+07	2.20856e+07	12022559	2.21862e+07	1.71044e+07	1.52087e+07	1.02275e+07
High	Master Protein	P62753	Small ribosomal subunit protein eS6 OS=Homo sapiens OX=9606 GN=RPS6 PE=1 SV=1	37	9	31	9	28.7	RPS6	5.23384e+06	4.0431e+06	4.63847e+06	3.56611e+07	3.58109e+07	3.5736e+07	2.61494e+07	3.94434e+07	3.27964e+07	3.10975e+07	2.81579e+07
High	Master Protein	P57721	Poly(rC)-binding protein 3 OS=Homo sapiens OX=9606 GN=PCBP3 PE=1 SV=2	23	7	31	1	39.4	PCBP3			#DIV/0!		1.36098e+06	1.36098e+06	1.7756e+06	2726072	2.25084e+06	#DIV/0!	#DIV/0!
High	Master Protein	Q93009	Ubiquitin carboxyl-terminal hydrolase 7 OS=Homo sapiens OX=9606 GN=USP7 PE=1 SV=2	14	13	31	13	128.2	USP7	604241	377484	490863	1.79031e+07	8.19517e+06	1.30491e+07	1.32985e+07	1.15868e+07	1.24427e+07	1.25583e+07	1.19518e+07
High	Master Protein	P31153	S-adenosylmethionine synthase isoform type-2 OS=Homo sapiens OX=9606 GN=MAT2A PE=1 SV=1	28	11	31	11	43.6	MAT2A	5.33719e+06	3.40734e+06	4.37226e+06	5.28763e+07	4.66277e+07	4.9752e+07	2.97938e+07	3.88571e+07	3.43255e+07	4.53797e+07	2.99532e+07
High	Master Protein	Q15751	Probable E3 ubiquitin-protein ligase HERC1 OS=Homo sapiens OX=9606 GN=HERC1 PE=1 SV=2	4	14	31	14	531.9	HERC1	1.74212e+06	1.14572e+06	1.44392e+06	2.85316e+07	2.58307e+07	2.71811e+07	2.17116e+07	2.07927e+07	2.12521e+07	2.57372e+07	1.98082e+07
High	Master Protein	Q07020	Large ribosomal subunit protein eL18 OS=Homo sapiens OX=9606 GN=RPL18 PE=1 SV=2	39	7	31	7	21.6	RPL18	2.59883e+07	7.87959e+06	1.69339e+07	5.56838e+07	4.3905e+07	4.97944e+07	37565515	5.43351e+07	4.59503e+07	3.28604e+07	2.90164e+07
High	Master Protein	P11717	Cation-independent mannose-6-phosphate receptor OS=Homo sapiens OX=9606 GN=IGF2R PE=1 SV=3	4	10	31	10	274.2	IGF2R	1.87592e+06	825283	1.3506e+06	1.1891e+07	1.44982e+07	1.31946e+07	1.10852e+07	1.0183e+07	1.06341e+07	1.1844e+07	9.28353e+06
High	Master Protein	Q9NTJ5	Phosphatidylinositol-3-phosphatase SAC1 OS=Homo sapiens OX=9606 GN=SACM1L PE=1 SV=2	19	11	31	11	66.9	SACM1L	1.59135e+06	400691	996018	2.9268e+07	2.67248e+07	2.79964e+07	2.02886e+07	2.69226e+07	2.36056e+07	2.70004e+07	2.26095e+07
High	Master Protein	Q9HD45	Transmembrane 9 superfamily member 3 OS=Homo sapiens OX=9606 GN=TM9SF3 PE=1 SV=2	21	10	31	10	67.8	TM9SF3	236643	91839.8	164242	6.30663e+07	5.81326e+07	6.05995e+07	5.62682e+07	4.85531e+07	5.24106e+07	6.04352e+07	5.22464e+07
High	Master Protein	Q53H12	Acylglycerol kinase, mitochondrial OS=Homo sapiens OX=9606 GN=AGK PE=1 SV=2	31	10	31	10	47.1	AGK	2.89947e+06	1.67702e+06	2.28825e+06	79728739	5.24385e+07	6.60836e+07	4.14878e+07	5.57309e+07	4.86094e+07	6.37954e+07	4.63211e+07
High	Master Protein	Q9UI26	Importin-11 OS=Homo sapiens OX=9606 GN=IPO11 PE=1 SV=1	18	12	31	12	112.5	IPO11		453571	453571	28063825	2.13286e+07	2.46962e+07	2.05334e+07	2.06783e+07	2.06059e+07	2.42427e+07	2.01523e+07
High	Master Protein	Q5T160	Probable arginine--tRNA ligase, mitochondrial OS=Homo sapiens OX=9606 GN=RARS2 PE=1 SV=1	28	13	31	13	65.5	RARS2	1.08013e+06	707195	893662	3.703e+07	3.06488e+07	3.38394e+07	28128853	2.77961e+07	2.79625e+07	3.29457e+07	2.70688e+07
High	Master Protein	Q9BZF1	Oxysterol-binding protein-related protein 8 OS=Homo sapiens OX=9606 GN=OSBPL8 PE=1 SV=3	17	12	31	12	101.1	OSBPL8	1204866	837168	1.02102e+06	3.42892e+07	2.68907e+07	3.05899e+07	2.33335e+07	2.77857e+07	2.55596e+07	2.95689e+07	2.45386e+07
High	Master Protein	Q13257	Mitotic spindle assembly checkpoint protein MAD2A OS=Homo sapiens OX=9606 GN=MAD2L1 PE=1 SV=1	37	8	30	8	23.5	MAD2L1	2.9436e+07	2.90529e+07	2.92444e+07	1.28188e+08	96156802	1.12172e+08	7.28446e+07	9.84236e+07	8.56341e+07	8.29277e+07	5.63897e+07
High	Master Protein	O60716	Catenin delta-1 OS=Homo sapiens OX=9606 GN=CTNND1 PE=1 SV=1	17	12	30	12	108.1	CTNND1	2.90379e+06	2.41341e+06	2.6586e+06	1.51967e+07	1.26199e+07	1.39083e+07	1.3623e+07	1.52403e+07	1.44317e+07	1.12497e+07	1.17731e+07
High	Master Protein	Q9UP83	Conserved oligomeric Golgi complex subunit 5 OS=Homo sapiens OX=9606 GN=COG5 PE=1 SV=3	15	11	30	11	92.7		723674	365570	544622	1.9019e+07	1.55768e+07	1.72979e+07	1.33316e+07	1.55686e+07	1.44501e+07	1.67533e+07	1.39055e+07
High	Master Protein	O96005	Putative lipid scramblase CLPTM1 OS=Homo sapiens OX=9606 GN=CLPTM1 PE=1 SV=1	22	11	30	11	76	CLPTM1	3.18892e+06	2.49461e+06	2.84177e+06	4.92871e+07	4.12512e+07	4.52691e+07	3.28781e+07	3.62392e+07	3.45587e+07	4.24274e+07	3.17169e+07
High	Master Protein	P42677	Small ribosomal subunit protein eS27 OS=Homo sapiens OX=9606 GN=RPS27 PE=1 SV=3	40	5	30	5	9.5	RPS27	7.827e+06	3.46202e+06	5.64451e+06	1.52844e+08	1.72995e+08	1.62919e+08	1.28322e+08	1.29233e+08	1.28778e+08	1.57275e+08	1.23133e+08
High	Master Protein	Q9ULX6	A-kinase anchor protein 8-like OS=Homo sapiens OX=9606 GN=AKAP8L PE=1 SV=4	22	11	30	11	71.6	AKAP8L	129205		129205	3.11331e+07	2.13779e+07	2.62555e+07	1.89983e+07	2.12791e+07	2.01387e+07	2.61263e+07	2.00095e+07
High	Master Protein	Q5C9Z4	Nucleolar MIF4G domain-containing protein 1 OS=Homo sapiens OX=9606 GN=NOM1 PE=1 SV=1	14	9	30	9	96.2	NOM1	519750	365187	442468	1.16966e+07	8.37969e+06	1.00381e+07	6.23904e+06	7.1344e+06	6.68672e+06	9.59568e+06	6.24425e+06
High	Master Protein	Q09028	Histone-binding protein RBBP4 OS=Homo sapiens OX=9606 GN=RBBP4 PE=1 SV=3	17	7	30	1	47.6	RBBP4	3.35834e+06	1.95671e+06	2.65752e+06	5.24448e+06	6.94953e+06	6.09701e+06	4.0591e+06	3.85779e+06	3.95845e+06	3.43948e+06	1.30092e+06
High	Master Protein	Q15233	Non-POU domain-containing octamer-binding protein OS=Homo sapiens OX=9606 GN=NONO PE=1 SV=4	22	9	30	8	54.2	NONO	7.19429e+06	7.31818e+06	7.25623e+06	1.85002e+07	1.54781e+07	1.69891e+07	1.23709e+07	1.59116e+07	1.41412e+07	9.73287e+06	6.88501e+06
High	Master Protein	P28340	DNA polymerase delta catalytic subunit OS=Homo sapiens OX=9606 GN=POLD1 PE=1 SV=2	14	13	30	13	123.6	POLD1	4.48443e+06	1.63916e+06	3.0618e+06	1.81793e+07	1.28141e+07	1.54967e+07	1.18988e+07	1.19862e+07	1.19425e+07	1.24349e+07	8.88072e+06
High	Master Protein	Q08AM6	Protein VAC14 homolog OS=Homo sapiens OX=9606 GN=VAC14 PE=1 SV=1	19	12	29	12	87.9	VAC14	123240	427919	275579	3.20866e+07	2.31929e+07	2.76398e+07	18244223	1.96981e+07	1.89711e+07	2.73642e+07	1.86956e+07
High	Master Protein	P10644	cAMP-dependent protein kinase type I-alpha regulatory subunit OS=Homo sapiens OX=9606 GN=PRKAR1A PE=1 SV=1	30	10	29	9	43	PRKAR1A	2.52691e+06	2.2033e+06	2.36511e+06	56698124	3.84902e+07	4.75942e+07	3.2664e+07	3.87722e+07	3.57181e+07	4.5229e+07	3.3353e+07
High	Master Protein	Q13561	Dynactin subunit 2 OS=Homo sapiens OX=9606 GN=DCTN2 PE=1 SV=4	28	9	29	9	44.2	DCTN2	5.20202e+06	3.19084e+06	4.19643e+06	1.58196e+07	1.1355e+07	1.35873e+07	6.5129e+06	9.61912e+06	8.06601e+06	9.3909e+06	3.86958e+06
High	Master Protein	Q9UI12	V-type proton ATPase subunit H OS=Homo sapiens OX=9606 GN=ATP6V1H PE=1 SV=1	27	10	29	10	55.8	ATP6V1H	702411	322813	512612	2.2122e+07	2.21824e+07	2.21522e+07	1.58818e+07	1.40167e+07	1.49493e+07	2.16396e+07	1.44366e+07
High	Master Protein	Q96SK2	Transmembrane protein 209 OS=Homo sapiens OX=9606 GN=TMEM209 PE=1 SV=2	18	8	29	8	62.9	TMEM209	745574	327861	536717	1.73639e+07	1.87522e+07	1.80581e+07	1.52652e+07	1.58453e+07	1.55552e+07	1.75214e+07	1.50185e+07
High	Master Protein	P07237	Protein disulfide-isomerase OS=Homo sapiens OX=9606 GN=P4HB PE=1 SV=3	24	10	29	10	57.1	P4HB	2.33624e+06	1.463e+06	1.89962e+06	1.47184e+07	1.25308e+07	1.36246e+07	8.80202e+06	1.14332e+07	1.01176e+07	1.1725e+07	8.21797e+06
High	Master Protein	Q8NE01	Metal transporter CNNM3 OS=Homo sapiens OX=9606 GN=CNNM3 PE=1 SV=1	24	11	29	10	76.1	CNNM3	144101	761453	452777	1.76495e+07	1.49091e+07	1.62793e+07	1.42909e+07	1.45956e+07	1.44432e+07	1.58265e+07	13990432
High	Master Protein	Q9H9S3	Protein transport protein Sec61 subunit alpha isoform 2 OS=Homo sapiens OX=9606 GN=SEC61A2 PE=2 SV=3	13	6	29	1	52.2	SEC61A2			#DIV/0!	4944831		4944831	2.26089e+06		2.26089e+06	#DIV/0!	#DIV/0!
High	Master Protein	O60506	Heterogeneous nuclear ribonucleoprotein Q OS=Homo sapiens OX=9606 GN=SYNCRIP PE=1 SV=2	16	8	29	5	69.6	SYNCRIP	3.08128e+06	2.26306e+06	2.67217e+06	2.00228e+07	1.57759e+07	1.78994e+07	1.17709e+07	1.56008e+07	1.36859e+07	1.52272e+07	1.10137e+07
High	Master Protein	Q8WUY1	Protein THEM6 OS=Homo sapiens OX=9606 GN=THEM6 PE=1 SV=2	56	10	29	10	23.9	THEM6	222237	1.11515e+06	668692	2.50579e+07	1.85421e+07	2.18e+07	2.24795e+07	2.29346e+07	2.27071e+07	2.11313e+07	2.20384e+07
High	Master Protein	Q5VV42	Threonylcarbamoyladenosine tRNA methylthiotransferase OS=Homo sapiens OX=9606 GN=CDKAL1 PE=1 SV=1	28	13	29	13	65.1	CDKAL1	1.33381e+06	773064	1.05344e+06	4.3508e+07	32019504	3.77638e+07	2.59494e+07	3.02506e+07	2.81e+07	3.67103e+07	2.70465e+07
High	Master Protein	P16402	Histone H1.3 OS=Homo sapiens OX=9606 GN=H1-3 PE=1 SV=2	21	7	29	7	22.3	H1-3	7.28099e+06	4.45475e+06	5.86787e+06	3.5999e+07	2.77203e+07	3.18596e+07	1.5858e+07	2.99264e+07	2.28922e+07	2.59918e+07	1.70243e+07
High	Master Protein	P18124	Large ribosomal subunit protein uL30 OS=Homo sapiens OX=9606 GN=RPL7 PE=1 SV=1	40	10	29	10	29.2	RPL7	1.39969e+07	7.94484e+06	1.09709e+07	6.01855e+07	4.73835e+07	5.37845e+07	3.05847e+07	5.75082e+07	4.40464e+07	4.28136e+07	3.30755e+07
High	Master Protein	P10398	Serine/threonine-protein kinase A-Raf OS=Homo sapiens OX=9606 GN=ARAF PE=1 SV=2	26	11	29	8	67.5	ARAF	443120	739626	591373	9.33825e+06	8.00968e+06	8.67397e+06	6.70237e+06	8.24625e+06	7.47431e+06	8.08259e+06	6.88294e+06
High	Master Protein	P50454	Serpin H1 OS=Homo sapiens OX=9606 GN=SERPINH1 PE=1 SV=2	33	9	29	9	46.4	SERPINH1	1.91138e+06	2.00696e+06	1.95917e+06	2.89164e+07	2.37187e+07	2.63175e+07	1.84173e+07	2.09975e+07	1.97074e+07	2.43584e+07	1.77483e+07
High	Master Protein	Q15008	26S proteasome non-ATPase regulatory subunit 6 OS=Homo sapiens OX=9606 GN=PSMD6 PE=1 SV=1	28	10	29	10	45.5	PSMD6	7.31886e+06	4.06202e+06	5.69044e+06	3.48199e+07	24407360	2.96136e+07	1.81838e+07	2.61445e+07	2.21641e+07	2.39232e+07	1.64737e+07
High	Master Protein	Q9BVP2	Guanine nucleotide-binding protein-like 3 OS=Homo sapiens OX=9606 GN=GNL3 PE=1 SV=2	22	9	28	9	62	GNL3	1.28901e+06	1.2108e+06	1.2499e+06	1.23601e+07	1.21836e+07	1.22718e+07	1.20092e+07	1.28036e+07	1.24064e+07	1.10219e+07	1.11565e+07
High	Master Protein	Q9H3U1	Protein unc-45 homolog A OS=Homo sapiens OX=9606 GN=UNC45A PE=1 SV=1	16	11	28	11	103	UNC45A	151850	165854	158852	1.30309e+07	1.25411e+07	1.2786e+07	1.02215e+07	1.07087e+07	1.04651e+07	1.26272e+07	1.03063e+07
High	Master Protein	O14974	Protein phosphatase 1 regulatory subunit 12A OS=Homo sapiens OX=9606 GN=PPP1R12A PE=1 SV=1	13	10	28	10	115.2	PPP1R12A	4.6993e+06	4.38416e+06	4.54173e+06	1.76894e+07	1.54523e+07	1.65708e+07	1.02413e+07	1.36343e+07	1.19378e+07	1.20291e+07	7.3961e+06
High	Master Protein	O43684	Mitotic checkpoint protein BUB3 OS=Homo sapiens OX=9606 GN=BUB3 PE=1 SV=1	28	7	28	7	37.1	BUB3	2.68745e+06	2.35914e+06	2.52329e+06	1.34568e+07	9.33103e+06	1.13939e+07	7.97393e+06	1.06578e+07	9.31585e+06	8.87064e+06	6.79256e+06
High	Master Protein	Q92542	Nicastrin OS=Homo sapiens OX=9606 GN=NCSTN PE=1 SV=2	17	9	28	9	78.4	NCSTN	1.18476e+06	1.09902e+06	1.14189e+06	73372789	6.38665e+07	6.86197e+07	5.81841e+07	6.83605e+07	6.32723e+07	6.74778e+07	6.21304e+07
High	Master Protein	O43615	Mitochondrial import inner membrane translocase subunit TIM44 OS=Homo sapiens OX=9606 GN=TIMM44 PE=1 SV=2	18	7	28	7	51.3	TIMM44	1.95824e+06	1.06156e+06	1.5099e+06	1.52107e+07	1.32846e+07	1.42477e+07	1.25824e+07	1.56034e+07	1.40929e+07	1.27378e+07	1.2583e+07
High	Master Protein	P62241	Small ribosomal subunit protein eS8 OS=Homo sapiens OX=9606 GN=RPS8 PE=1 SV=2	46	8	28	8	24.2	RPS8	2.74326e+06	1.65978e+06	2.20152e+06	2.27843e+07	2.32207e+07	2.30025e+07	1.89514e+07	3.46899e+07	2.68207e+07	2.0801e+07	2.46192e+07
High	Master Protein	O43318	Mitogen-activated protein kinase kinase kinase 7 OS=Homo sapiens OX=9606 GN=MAP3K7 PE=1 SV=1	12	6	28	6	67.2	MAP3K7	2.03427e+06	1.54477e+06	1.78952e+06	1.24341e+07	1.28191e+07	1.26266e+07	9.3808e+06	9.75526e+06	9.56803e+06	1.08371e+07	7.77851e+06
High	Master Protein	Q8WVM8	Sec1 family domain-containing protein 1 OS=Homo sapiens OX=9606 GN=SCFD1 PE=1 SV=4	22	10	28	10	72.3	SCFD1	474480	761837	618158	2.83129e+07	2.55673e+07	2.69401e+07	2.28284e+07	2.79994e+07	2.54139e+07	2.6322e+07	24795766
High	Master Protein	P09543	2',3'-cyclic-nucleotide 3'-phosphodiesterase OS=Homo sapiens OX=9606 GN=CNP PE=1 SV=2	38	13	28	13	47.5	CNP	1.54719e+06	767568	1.15738e+06	3.62242e+07	2.91992e+07	3.27117e+07	2.30042e+07	2.62588e+07	2.46315e+07	3.15544e+07	2.34741e+07
High	Master Protein	P31040	Succinate dehydrogenase [ubiquinone] flavoprotein subunit, mitochondrial OS=Homo sapiens OX=9606 GN=SDHA PE=1 SV=2	23	12	28	12	72.6	SDHA	2.90831e+06	2.04907e+06	2.47869e+06	3.56659e+07	3.99527e+07	3.78093e+07	3.59681e+07	3.87488e+07	3.73585e+07	3.53306e+07	3.48798e+07
High	Master Protein	P07355	Annexin A2 OS=Homo sapiens OX=9606 GN=ANXA2 PE=1 SV=2	19	5	28	5	38.6	ANXA2	9.06104e+06	6.55886e+06	7.80995e+06	1.84948e+07	1.47374e+07	1.66161e+07	1.29238e+07	1.35327e+07	1.32282e+07	8.80614e+06	5.41829e+06
High	Master Protein	Q6P4Q7	Metal transporter CNNM4 OS=Homo sapiens OX=9606 GN=CNNM4 PE=1 SV=3	18	12	28	9	86.6	CNNM4	738806		738806	2.16259e+07	1.74065e+07	1.95162e+07	1.47144e+07	1.47781e+07	1.47463e+07	1.87774e+07	1.40075e+07
High	Master Protein	Q8IXI2	Mitochondrial Rho GTPase 1 OS=Homo sapiens OX=9606 GN=RHOT1 PE=1 SV=2	19	9	28	8	70.7	RHOT1	148851	118915	133883	2.8406e+07	2.21686e+07	2.52873e+07	2.41205e+07	2.83966e+07	2.62586e+07	2.51534e+07	2.61247e+07
High	Master Protein	P62879	Guanine nucleotide-binding protein G(I)/G(S)/G(T) subunit beta-2 OS=Homo sapiens OX=9606 GN=GNB2 PE=1 SV=3	30	8	28	3	37.3	GNB2	999302	219450	609376	3.6999e+06	5.11679e+06	4.40834e+06	3.95847e+06	5.5018e+06	4.73013e+06	3.79897e+06	4.12076e+06
High	Master Protein	Q9Y6D5	Brefeldin A-inhibited guanine nucleotide-exchange protein 2 OS=Homo sapiens OX=9606 GN=ARFGEF2 PE=1 SV=3	8	12	27	8	201.9	ARFGEF2	220842	115082	167962	8.43787e+06	7.81512e+06	8.12649e+06	6.5199e+06	5.19832e+06	5.85911e+06	7.95853e+06	5.69115e+06
High	Master Protein	P26373	Large ribosomal subunit protein eL13 OS=Homo sapiens OX=9606 GN=RPL13 PE=1 SV=4	36	9	27	9	24.2	RPL13	6.30963e+06	6.47547e+06	6.39255e+06	5.75908e+07	4.14258e+07	4.95083e+07	2.79309e+07	5.1793e+07	3.98619e+07	4.31158e+07	3.34694e+07
High	Master Protein	Q5JTZ9	Alanine--tRNA ligase, mitochondrial OS=Homo sapiens OX=9606 GN=AARS2 PE=1 SV=1	14	9	27	9	107.3	AARS2	620323	214346	417334	1.07355e+07	9.48521e+06	1.01104e+07	6.7907e+06	7.0582e+06	6.92445e+06	9.69303e+06	6.50711e+06
High	Master Protein	P08865	Small ribosomal subunit protein uS2 OS=Homo sapiens OX=9606 GN=RPSA PE=1 SV=4	37	7	27	7	32.8	RPSA	1.65935e+07	12039838	1.43166e+07	6.9749e+07	7.35984e+07	7.16737e+07	4.24434e+07	5.75175e+07	4.99805e+07	5.7357e+07	3.56638e+07
High	Master Protein	A3KMH1	von Willebrand factor A domain-containing protein 8 OS=Homo sapiens OX=9606 GN=VWA8 PE=1 SV=2	6	10	27	10	214.7	VWA8	567349	809371	688360	1.83989e+07	1.09638e+07	1.46814e+07	9.57367e+06	9.40728e+06	9.49048e+06	1.3993e+07	8.80212e+06
High	Master Protein	P38435	Vitamin K-dependent gamma-carboxylase OS=Homo sapiens OX=9606 GN=GGCX PE=1 SV=2	13	8	27	8	87.5	GGCX		234856	234856	4.29754e+07	3.25381e+07	3.77567e+07	2.69533e+07	2.56327e+07	2.6293e+07	3.75219e+07	2.60582e+07
High	Master Protein	P04899	Guanine nucleotide-binding protein G(i) subunit alpha-2 OS=Homo sapiens OX=9606 GN=GNAI2 PE=1 SV=3	33	10	27	5	40.4	GNAI2	2.62577e+06	2.02942e+06	2.32759e+06	9.48779e+06	6.56136e+06	8.02458e+06	4.24016e+06	4.8399e+06	4.54003e+06	5.69698e+06	2.21244e+06
High	Master Protein	Q9Y4P3	Transducin beta-like protein 2 OS=Homo sapiens OX=9606 GN=TBL2 PE=1 SV=1	27	9	27	9	49.8	TBL2	1.10875e+06	272311	690531	2.32998e+07	2.13867e+07	2.23432e+07	1.47618e+07	2.03203e+07	1.7541e+07	2.16527e+07	1.68505e+07
High	Master Protein	Q9P2W9	Syntaxin-18 OS=Homo sapiens OX=9606 GN=STX18 PE=1 SV=1	33	9	27	9	38.7	STX18	12026.3	416212	214119	2.03051e+07	1.62366e+07	1.82708e+07	1.22637e+07	1.65108e+07	1.43872e+07	1.80567e+07	1.41731e+07
High	Master Protein	P62280	Small ribosomal subunit protein uS17 OS=Homo sapiens OX=9606 GN=RPS11 PE=1 SV=3	46	7	27	7	18.4	RPS11	1.84866e+07	1.63435e+07	1.74151e+07	8.03344e+07	7.84143e+07	7.93743e+07	69784726	8.26624e+07	7.62235e+07	6.19593e+07	5.88085e+07
High	Master Protein	O43823	A-kinase anchor protein 8 OS=Homo sapiens OX=9606 GN=AKAP8 PE=1 SV=1	23	10	27	10	76.1	AKAP8	661074	1.33139e+06	996232	2.28546e+07	2.03066e+07	2.15806e+07	1.64073e+07	1.78286e+07	1.7118e+07	2.05843e+07	1.61217e+07
High	Master Protein	Q9UBM7	7-dehydrocholesterol reductase OS=Homo sapiens OX=9606 GN=DHCR7 PE=1 SV=1	17	7	27	7	54.5	DHCR7	1.84376e+06	1.13192e+06	1.48784e+06	196465685	1.45289e+08	1.70877e+08	1.04008e+08	1.15332e+08	1.0967e+08	1.69389e+08	1.08182e+08
High	Master Protein	Q9BWF3	RNA-binding protein 4 OS=Homo sapiens OX=9606 GN=RBM4 PE=1 SV=1	33	9	27	9	40.3	RBM4	1.94759e+06	1.29836e+06	1.62298e+06	2.24798e+07	1.63126e+07	1.93962e+07	1.46852e+07	1.95504e+07	1.71178e+07	1.77732e+07	1.54948e+07
High	Master Protein	P11172	Uridine 5'-monophosphate synthase OS=Homo sapiens OX=9606 GN=UMPS PE=1 SV=1	20	8	26	8	52.2	UMPS	1.65479e+06	1.12765e+06	1.39122e+06	2.87252e+07	2.18765e+07	2.53008e+07	2.15035e+07	1.79983e+07	1.97509e+07	2.39096e+07	1.83597e+07
High	Master Protein	Q6P3X3	Tetratricopeptide repeat protein 27 OS=Homo sapiens OX=9606 GN=TTC27 PE=1 SV=1	20	12	26	12	96.6	TTC27	406235	481463	443849	1.87905e+07	1.59761e+07	1.73833e+07	1.59714e+07	1.61144e+07	1.60429e+07	1.69394e+07	1.55991e+07
High	Master Protein	Q8IZL8	Proline-, glutamic acid- and leucine-rich protein 1 OS=Homo sapiens OX=9606 GN=PELP1 PE=1 SV=2	9	8	26	8	119.6	PELP1	1.30103e+06	1.27443e+06	1.28773e+06	2.42567e+07	1.90589e+07	2.16578e+07	1.86003e+07	1.79217e+07	1.8261e+07	2.03701e+07	1.69733e+07
High	Master Protein	Q04917	14-3-3 protein eta OS=Homo sapiens OX=9606 GN=YWHAH PE=1 SV=4	25	7	26	4	28.2	YWHAH	163978	136548	150263	5.17916e+06	4.77752e+06	4.97834e+06	1.06104e+06	4.35338e+06	2.70721e+06	4.82808e+06	2.55695e+06
High	Master Protein	P54709	Sodium/potassium-transporting ATPase subunit beta-3 OS=Homo sapiens OX=9606 GN=ATP1B3 PE=1 SV=1	31	7	26	7	31.5	ATP1B3	1.21921e+06	376580	797895	6.83334e+07	3.99792e+07	5.41563e+07	3.69534e+07	4.91919e+07	4.30727e+07	5.33584e+07	4.22748e+07
High	Master Protein	Q86XI2	Condensin-2 complex subunit G2 OS=Homo sapiens OX=9606 GN=NCAPG2 PE=1 SV=1	11	10	26	10	130.9	NCAPG2	174332		174332	2.99512e+07	2.25121e+07	2.62317e+07	1.5701e+07	1.76776e+07	1.66893e+07	2.60573e+07	1.6515e+07
High	Master Protein	P11177	Pyruvate dehydrogenase E1 component subunit beta, mitochondrial OS=Homo sapiens OX=9606 GN=PDHB PE=1 SV=3	32	9	26	9	39.2	PDHB	4.20237e+06	3.74151e+06	3.97194e+06	3.52604e+07	3.2199e+07	3.37297e+07	2.05855e+07	2.53125e+07	2.2949e+07	2.97577e+07	1.8977e+07
High	Master Protein	Q9H4A3	Serine/threonine-protein kinase WNK1 OS=Homo sapiens OX=9606 GN=WNK1 PE=1 SV=2	7	12	26	9	250.6	WNK1	4.02084e+06	3.08818e+06	3.55451e+06	5.2827e+06	4.05443e+06	4.66856e+06	3.73288e+06	1.46124e+06	2.59706e+06	1.11405e+06	-957447
High	Master Protein	Q9Y277	Voltage-dependent anion-selective channel protein 3 OS=Homo sapiens OX=9606 GN=VDAC3 PE=1 SV=1	23	6	26	5	30.6	VDAC3	914084	1.14628e+06	1.03018e+06	3.40751e+07	3.2125e+07	3.31001e+07	26601389	37585747	32093568	3.20699e+07	3.10634e+07
High	Master Protein	O14981	TATA-binding protein-associated factor 172 OS=Homo sapiens OX=9606 GN=BTAF1 PE=1 SV=2	9	11	26	11	206.8	BTAF1	668442		668442	1.35378e+07	9.79019e+06	1.1664e+07	6.29261e+06	6.73265e+06	6.51263e+06	1.09956e+07	5.84419e+06
High	Master Protein	Q9UKM7	Endoplasmic reticulum mannosyl-oligosaccharide 1,2-alpha-mannosidase OS=Homo sapiens OX=9606 GN=MAN1B1 PE=1 SV=2	23	10	26	10	79.5	MAN1B1	164897		164897	1.6202e+07	8.35767e+06	1.22798e+07	1.14667e+07	9.84464e+06	1.06557e+07	1.21149e+07	1.04908e+07
High	Master Protein	Q96D09	G-protein coupled receptor-associated sorting protein 2 OS=Homo sapiens OX=9606 GN=GPRASP2 PE=1 SV=1	14	8	26	8	93.7	GPRASP2	163576		163576	9.98698e+06	8.9585e+06	9.47274e+06	5.84534e+06	5.49315e+06	5.66924e+06	9.30916e+06	5.50567e+06
High	Master Protein	Q92615	La-related protein 4B OS=Homo sapiens OX=9606 GN=LARP4B PE=1 SV=3	16	10	26	10	80.5	LARP4B	2.90945e+06	2.05424e+06	2.48185e+06	1.59847e+07	1.24367e+07	1.42107e+07	1.06858e+07	1.00292e+07	1.03575e+07	1.17289e+07	7.87563e+06
High	Master Protein	P41250	Glycine--tRNA ligase OS=Homo sapiens OX=9606 GN=GARS1 PE=1 SV=3	18	11	26	11	83.1	GARS1	1.11905e+06	1.36826e+06	1.24365e+06	1.49695e+07	1.5324e+07	1.51467e+07	2.0375e+07	2.07109e+07	2.0543e+07	1.39031e+07	1.92993e+07
High	Master Protein	Q9Y5Q9	General transcription factor 3C polypeptide 3 OS=Homo sapiens OX=9606 GN=GTF3C3 PE=1 SV=1	18	10	26	10	101.2	GTF3C3	2.3144e+06	2.18539e+06	2.2499e+06	1.7458e+07	1.68989e+07	1.71785e+07	1.39099e+07	1.52331e+07	1.45715e+07	1.49286e+07	1.23216e+07
High	Master Protein	P25789	Proteasome subunit alpha type-4 OS=Homo sapiens OX=9606 GN=PSMA4 PE=1 SV=1	34	7	26	7	29.5	PSMA4	2.27444e+06	1.84356e+06	2.059e+06	2.86649e+07	2.31586e+07	2.59118e+07	1.66614e+07	2.34335e+07	2.00475e+07	2.38528e+07	1.79885e+07
High	Master Protein	Q9NZI8	Insulin-like growth factor 2 mRNA-binding protein 1 OS=Homo sapiens OX=9606 GN=IGF2BP1 PE=1 SV=2	16	8	25	7	63.4	IGF2BP1	3.15975e+06	4.76093e+06	3.96034e+06	2.73987e+07	2.61836e+07	2.67911e+07	1.69766e+07	2.12973e+07	1.91369e+07	2.28308e+07	1.51766e+07
High	Master Protein	Q02878	Large ribosomal subunit protein eL6 OS=Homo sapiens OX=9606 GN=RPL6 PE=1 SV=3	32	7	25	7	32.7	RPL6	8.88281e+06	5.33297e+06	7.10789e+06	5.04679e+07	5.07659e+07	5.06169e+07	3.36965e+07	5.1977e+07	4.28368e+07	4.3509e+07	3.57289e+07
High	Master Protein	Q6NUQ1	RAD50-interacting protein 1 OS=Homo sapiens OX=9606 GN=RINT1 PE=1 SV=1	12	9	25	9	90.6	RINT1		912564	912564	2.73294e+07	2.02929e+07	2.38111e+07	1.53628e+07	12555975	1.39594e+07	2.28986e+07	1.30468e+07
High	Master Protein	P07196	Neurofilament light polypeptide OS=Homo sapiens OX=9606 GN=NEFL PE=1 SV=3	15	8	25	7	61.5	NEFL	2.56588e+06	2.29826e+06	2.43207e+06	1.1082e+07	9.5201e+06	1.03011e+07	7.82692e+06	9817238	8.82208e+06	7.869e+06	6.39001e+06
High	Master Protein	O43819	Protein SCO2 homolog, mitochondrial OS=Homo sapiens OX=9606 GN=SCO2 PE=1 SV=3	38	7	25	7	29.8	SCO2	3.51912e+06	1.00367e+06	2.26139e+06	4.75391e+07	3.04432e+07	3.89911e+07	2.40765e+07	3.42361e+07	2.91563e+07	3.67298e+07	2.68949e+07
High	Master Protein	P62873	Guanine nucleotide-binding protein G(I)/G(S)/G(T) subunit beta-1 OS=Homo sapiens OX=9606 GN=GNB1 PE=1 SV=3	28	8	25	3	37.4	GNB1	1.24673e+07	5.98845e+06	9.22789e+06	4.08273e+07	3.84934e+07	3.96603e+07	2.73937e+07	3.67489e+07	3.20713e+07	3.04324e+07	2.28434e+07
High	Master Protein	Q15436	Protein transport protein Sec23A OS=Homo sapiens OX=9606 GN=SEC23A PE=1 SV=2	14	8	25	6	86.1	SEC23A	605737	312649	459193	6.16979e+06	5331674	5.75073e+06	5.12577e+06	5.52364e+06	5.3247e+06	5.29154e+06	4.86551e+06
High	Master Protein	Q6UN15	Pre-mRNA 3'-end-processing factor FIP1 OS=Homo sapiens OX=9606 GN=FIP1L1 PE=1 SV=1	15	8	25	8	66.5	FIP1L1	1.24216e+06	867984	1.05507e+06	1.4825e+07	11815275	1.33201e+07	9.95046e+06	1.22112e+07	1.10808e+07	1.22651e+07	1.00258e+07
High	Master Protein	Q13724	Mannosyl-oligosaccharide glucosidase OS=Homo sapiens OX=9606 GN=MOGS PE=1 SV=5	17	9	25	9	91.9	MOGS	1.70634e+06	841530	1.27394e+06	2.78112e+07	1.71816e+07	2.24964e+07	1.73593e+07	1.97841e+07	1.85717e+07	2.12225e+07	1.72978e+07
High	Master Protein	P62805	Histone H4 OS=Homo sapiens OX=9606 GN=H4C1 PE=1 SV=2	55	6	25	6	11.4	H4C1; H4C11; H4C12; H4C13; H4C14; H4C15; H4C16; H4C2; H4C3; H4C4; H4C5; H4C6; H4C8; H4C9	1.41179e+07	7.95624e+06	1.10371e+07	2.0929e+07	1.27457e+07	1.68373e+07	11009652	1.14879e+07	1.12488e+07	5.80026e+06	211702
High	Master Protein	P48651	Phosphatidylserine synthase 1 OS=Homo sapiens OX=9606 GN=PTDSS1 PE=1 SV=1	15	8	25	8	55.5	PTDSS1	226240	319956	273098	5.76561e+07	4.36143e+07	5.06352e+07	4.26416e+07	3.83898e+07	4.05157e+07	5.03621e+07	4.02426e+07
High	Master Protein	P00338	L-lactate dehydrogenase A chain OS=Homo sapiens OX=9606 GN=LDHA PE=1 SV=2	25	9	25	8	36.7	LDHA	3.27475e+07	1.67042e+07	24725869	5.20806e+07	4.00119e+07	4.60462e+07	2.26939e+07	2.25708e+07	2.26324e+07	2.13204e+07	-2.0935e+06
High	Master Protein	P46777	Large ribosomal subunit protein uL18 OS=Homo sapiens OX=9606 GN=RPL5 PE=1 SV=3	31	8	25	8	34.3	RPL5	3.91655e+06	1.77575e+06	2.84615e+06	7.17192e+06	1.40359e+07	1.06039e+07	9.27435e+06	9.83551e+06	9.55493e+06	7.75774e+06	6.70878e+06
High	Master Protein	Q9HD23	Magnesium transporter MRS2 homolog, mitochondrial OS=Homo sapiens OX=9606 GN=MRS2 PE=1 SV=1	31	9	25	9	50.3	MRS2			#DIV/0!	2.07917e+07	1.67438e+07	1.87678e+07	1.11109e+07	1.92973e+07	1.52041e+07	#DIV/0!	#DIV/0!
High	Master Protein	O43707	Alpha-actinin-4 OS=Homo sapiens OX=9606 GN=ACTN4 PE=1 SV=2	9	7	25	2	104.8	ACTN4			#DIV/0!	2.57752e+06	895731	1.73662e+06	905370	762134	833752	#DIV/0!	#DIV/0!
High	Master Protein	Q7L0J3	Synaptic vesicle glycoprotein 2A OS=Homo sapiens OX=9606 GN=SV2A PE=1 SV=1	10	6	25	6	82.6	SV2A	86990.9	144623	115807	2.93092e+07	2.02756e+07	24792417	1.9545e+07	2.05853e+07	2.00651e+07	2.46766e+07	1.99493e+07
High	Master Protein	Q99707	Methionine synthase OS=Homo sapiens OX=9606 GN=MTR PE=1 SV=2	9	9	25	9	140.4	MTR	352590	607622	480106	1.38846e+07	9.11659e+06	1.15006e+07	8.06821e+06	8.91429e+06	8.49125e+06	1.10205e+07	8.01114e+06
High	Master Protein	Q9UPN7	Serine/threonine-protein phosphatase 6 regulatory subunit 1 OS=Homo sapiens OX=9606 GN=PPP6R1 PE=1 SV=5	19	9	25	9	96.7	PPP6R1	1.56902e+06	1.18722e+06	1.37812e+06	3.70112e+07	29149639	3.30804e+07	24182435	2.26509e+07	2.34167e+07	3.17023e+07	2.20386e+07
High	Master Protein	P42695	Condensin-2 complex subunit D3 OS=Homo sapiens OX=9606 GN=NCAPD3 PE=1 SV=2	8	9	25	9	168.8	NCAPD3	306807	272603	289705	1.36174e+07	1.35949e+07	1.36062e+07	7.50063e+06	5.29399e+06	6.39731e+06	1.33165e+07	6.10761e+06
High	Master Protein	P84085	ADP-ribosylation factor 5 OS=Homo sapiens OX=9606 GN=ARF5 PE=1 SV=2	44	5	25	2	20.5	ARF5	983929	768334	876131	8.86433e+06	5.01228e+06	6.9383e+06	4.26351e+06	5.56591e+06	4.91471e+06	6.06217e+06	4.03858e+06
High	Master Protein	O00303	Eukaryotic translation initiation factor 3 subunit F OS=Homo sapiens OX=9606 GN=EIF3F PE=1 SV=1	34	9	25	9	37.5	EIF3F	8.78507e+06	3.48859e+06	6.13683e+06	2.07174e+07	1.79666e+07	19341956	1.63301e+07	1.6489e+07	1.64096e+07	1.32051e+07	1.02728e+07
High	Master Protein	P29692	Elongation factor 1-delta OS=Homo sapiens OX=9606 GN=EEF1D PE=1 SV=5	30	6	24	6	31.1	EEF1D	1.00442e+07	5.02348e+06	7.53382e+06	1.5934e+07	1.24824e+07	1.42082e+07	6.73281e+06	9.25427e+06	7.99354e+06	6.67439e+06	459719
High	Master Protein	P47755	F-actin-capping protein subunit alpha-2 OS=Homo sapiens OX=9606 GN=CAPZA2 PE=1 SV=3	18	4	24	3	32.9	CAPZA2	5.59219e+06	3.32415e+06	4.45817e+06	11956501	8.13212e+06	1.00443e+07	4.78191e+06	5.9833e+06	5.3826e+06	5.58614e+06	924432
High	Master Protein	Q9NP72	Ras-related protein Rab-18 OS=Homo sapiens OX=9606 GN=RAB18 PE=1 SV=1	49	8	24	8	23	RAB18	99718.8	338854	219286	1.66902e+07	1.13836e+07	1.40369e+07	1.03517e+07	1.32432e+07	1.17975e+07	1.38176e+07	1.15782e+07
High	Master Protein	Q9BRR6	ADP-dependent glucokinase OS=Homo sapiens OX=9606 GN=ADPGK PE=1 SV=1	21	7	24	7	54.1	ADPGK	210722		210722	8.98145e+06	6.3902e+06	7.68583e+06	6.33203e+06	7.54701e+06	6.93952e+06	7.47511e+06	6.7288e+06
High	Master Protein	Q96I24	Far upstream element-binding protein 3 OS=Homo sapiens OX=9606 GN=FUBP3 PE=1 SV=2	21	11	24	9	61.6	FUBP3	1.70097e+06	1.43767e+06	1.56932e+06	1.5053e+07	8.54301e+06	1.1798e+07	1.0316e+07	8.86446e+06	9.59022e+06	1.02287e+07	8.0209e+06
High	Master Protein	Q6PJG6	BRCA1-associated ATM activator 1 OS=Homo sapiens OX=9606 GN=BRAT1 PE=1 SV=2	18	11	24	11	88.1	BRAT1	203701		203701	2.07983e+07	2.09365e+07	2.08674e+07	1.68123e+07	1.40085e+07	1.54104e+07	2.06637e+07	1.52067e+07
High	Master Protein	Q14146	Unhealthy ribosome biogenesis protein 2 homolog OS=Homo sapiens OX=9606 GN=URB2 PE=1 SV=2	10	11	24	11	170.4	URB2	844610	99548	472079	8.37642e+06	8.16959e+06	8.273e+06	1.22586e+07	7.36211e+06	9.81037e+06	7.80092e+06	9.33829e+06
High	Master Protein	O15067	Phosphoribosylformylglycinamidine synthase OS=Homo sapiens OX=9606 GN=PFAS PE=1 SV=4	9	9	24	9	144.6	PFAS	2.80203e+06	1.97731e+06	2.38967e+06	2.15573e+07	1.13436e+07	1.64504e+07	1.07749e+07	1.10259e+07	1.09004e+07	1.40608e+07	8.51075e+06
High	Master Protein	P07195	L-lactate dehydrogenase B chain OS=Homo sapiens OX=9606 GN=LDHB PE=1 SV=2	23	6	24	5	36.6	LDHB	1.32514e+07	5.73265e+06	9.49203e+06	20369588	1.04416e+07	1.54056e+07	8.43815e+06	1.07531e+07	9.59564e+06	5.91356e+06	103606
High	Master Protein	P00492	Hypoxanthine-guanine phosphoribosyltransferase OS=Homo sapiens OX=9606 GN=HPRT1 PE=1 SV=2	50	8	24	8	24.6	HPRT1	8.24924e+06	6.41383e+06	7.33153e+06	1.55515e+07	1.03163e+07	1.29339e+07	9.95525e+06	1.25357e+07	1.12455e+07	5.60235e+06	3.91395e+06
High	Master Protein	Q96S52	GPI transamidase component PIG-S OS=Homo sapiens OX=9606 GN=PIGS PE=1 SV=3	24	7	24	7	61.6	PIGS			#DIV/0!	2.74504e+07	2.96802e+07	2.85653e+07	2.31929e+07	2.94855e+07	2.63392e+07	#DIV/0!	#DIV/0!
High	Master Protein	Q99653	Calcineurin B homologous protein 1 OS=Homo sapiens OX=9606 GN=CHP1 PE=1 SV=3	48	8	24	8	22.4	CHP1		132248	132248	4.51926e+07	2.5005e+07	3.50988e+07	2.09992e+07	4.03026e+07	3.06509e+07	3.49666e+07	3.05186e+07
High	Master Protein	Q9H900	Protein zwilch homolog OS=Homo sapiens OX=9606 GN=ZWILCH PE=1 SV=2	20	9	24	9	67.2	ZWILCH	76419.8		76419.8	1.06423e+07	8.16913e+06	9.40569e+06	9.13976e+06	1.11434e+07	1.01416e+07	9.32928e+06	1.00651e+07
High	Master Protein	Q8NBP0	Tetratricopeptide repeat protein 13 OS=Homo sapiens OX=9606 GN=TTC13 PE=2 SV=3	15	10	24	10	96.8	TTC13	253403	231766	242584	1.44575e+07	1.09741e+07	1.27158e+07	10156651	1.1825e+07	1.09908e+07	1.24732e+07	1.07483e+07
High	Master Protein	P61313	Large ribosomal subunit protein eL15 OS=Homo sapiens OX=9606 GN=RPL15 PE=1 SV=2	39	8	24	8	24.1	RPL15	1.08268e+07	1.05071e+07	1.06669e+07	50697418	3.90792e+07	4.48883e+07	3.25165e+07	4.73611e+07	3.99388e+07	3.42214e+07	2.92719e+07
High	Master Protein	P24539	ATP synthase F(0) complex subunit B1, mitochondrial OS=Homo sapiens OX=9606 GN=ATP5PB PE=1 SV=2	39	9	23	9	28.9	ATP5PB	1.8781e+06	1.74825e+06	1.81318e+06	5.12277e+07	3.35326e+07	4.23802e+07	3.21642e+07	3.87763e+07	3.54702e+07	4.0567e+07	3.36571e+07
High	Master Protein	P30050	Large ribosomal subunit protein uL11 OS=Homo sapiens OX=9606 GN=RPL12 PE=1 SV=1	48	6	23	6	17.8	RPL12	1.25472e+07	1.0258e+07	1.14026e+07	5.46427e+07	40685289	4.7664e+07	3.2958e+07	3.48293e+07	3.38937e+07	3.62614e+07	2.2491e+07
High	Master Protein	Q99567	Nuclear pore complex protein Nup88 OS=Homo sapiens OX=9606 GN=NUP88 PE=1 SV=2	16	7	23	7	83.5	NUP88	1.19135e+06	697906	944626	1.15093e+07	9.15075e+06	1.033e+07	9.51756e+06	9.74011e+06	9.62884e+06	9.38538e+06	8.68421e+06
High	Master Protein	Q13347	Eukaryotic translation initiation factor 3 subunit I OS=Homo sapiens OX=9606 GN=EIF3I PE=1 SV=1	29	9	23	9	36.5	EIF3I	1.88439e+07	8.43716e+06	1.36405e+07	1.33796e+07	9.78134e+06	1.15805e+07	6.37323e+06	8.5178e+06	7.44551e+06	-2.06007e+06	-6.19501e+06
High	Master Protein	Q9NR50	Translation initiation factor eIF-2B subunit gamma OS=Homo sapiens OX=9606 GN=EIF2B3 PE=1 SV=1	32	10	23	10	50.2	EIF2B3	219289	127929	173609	1.26329e+07	1.09266e+07	1.17798e+07	1.03312e+07	1.24063e+07	1.13688e+07	1.16062e+07	1.11952e+07
High	Master Protein	Q9Y2L1	Exosome complex exonuclease RRP44 OS=Homo sapiens OX=9606 GN=DIS3 PE=1 SV=2	9	8	23	8	108.9	DIS3	2.8216e+06	2.66856e+06	2.74508e+06	1.12833e+07	9.2447e+06	1.0264e+07	8.21485e+06	9.2646e+06	8.73973e+06	7.5189e+06	5.99464e+06
High	Master Protein	Q9NS69	Mitochondrial import receptor subunit TOM22 homolog OS=Homo sapiens OX=9606 GN=TOMM22 PE=1 SV=3	63	5	23	5	15.5	TOMM22	1.64393e+06	731014	1.18747e+06	4.35563e+07	2.44276e+07	3.3992e+07	1.97065e+07	2.34397e+07	21573075	3.28045e+07	2.03856e+07
High	Master Protein	Q00587	Cdc42 effector protein 1 OS=Homo sapiens OX=9606 GN=CDC42EP1 PE=1 SV=1	37	9	23	9	40.3	CDC42EP1	3.61815e+06	3.03628e+06	3.32721e+06	5.26967e+07	4.37052e+07	48200919	2.93647e+07	3.43397e+07	3.18522e+07	4.48737e+07	2.8525e+07
High	Master Protein	P30041	Peroxiredoxin-6 OS=Homo sapiens OX=9606 GN=PRDX6 PE=1 SV=3	38	9	23	9	25	PRDX6	1.13082e+07	6.37428e+06	8.84122e+06	30746357	1.83142e+07	2.45303e+07	1.24559e+07	2.03088e+07	1.63823e+07	1.5689e+07	7.54113e+06
High	Master Protein	O75170	Serine/threonine-protein phosphatase 6 regulatory subunit 2 OS=Homo sapiens OX=9606 GN=PPP6R2 PE=1 SV=2	16	9	23	9	104.9	PPP6R2	236398		236398	6.01036e+06	5.65219e+06	5.83127e+06	5.93893e+06	4.75007e+06	5.3445e+06	5.59487e+06	5.1081e+06
High	Master Protein	Q99570	Phosphoinositide 3-kinase regulatory subunit 4 OS=Homo sapiens OX=9606 GN=PIK3R4 PE=1 SV=3	9	10	23	10	153	PIK3R4	795697	947018	871357	1.16953e+07	8.93776e+06	1.03165e+07	8.44889e+06	8.30787e+06	8.37838e+06	9.44517e+06	7.50702e+06
High	Master Protein	Q9HC21	Mitochondrial thiamine pyrophosphate carrier OS=Homo sapiens OX=9606 GN=SLC25A19 PE=1 SV=1	27	9	23	9	35.5	SLC25A19	404484	1.20462e+06	804552	3.7919e+07	2.82687e+07	3.30939e+07	1.66117e+07	3.00463e+07	2.3329e+07	3.22893e+07	2.25244e+07
High	Master Protein	P23258	Tubulin gamma-1 chain OS=Homo sapiens OX=9606 GN=TUBG1 PE=1 SV=2	19	7	23	7	51.1	TUBG1	1.70571e+06	1.32813e+06	1.51692e+06	1.65751e+07	18960741	1.77679e+07	1.65303e+07	20622313	1.85763e+07	1.6251e+07	1.70594e+07
High	Master Protein	Q10570	Cleavage and polyadenylation specificity factor subunit 1 OS=Homo sapiens OX=9606 GN=CPSF1 PE=1 SV=2	9	10	23	10	160.8	CPSF1	2.33203e+06	2.35028e+06	2.34116e+06	1.71623e+07	1.28012e+07	1.49818e+07	1.07547e+07	1.11122e+07	1.09335e+07	1.26406e+07	8.59229e+06
High	Master Protein	Q99733	Nucleosome assembly protein 1-like 4 OS=Homo sapiens OX=9606 GN=NAP1L4 PE=1 SV=1	20	7	23	5	42.8	NAP1L4	799982	760154	780068	7.05004e+06	4.54681e+06	5.79843e+06	4.59345e+06	5.94354e+06	5.2685e+06	5.01836e+06	4.48843e+06
High	Master Protein	Q92504	Zinc transporter SLC39A7 OS=Homo sapiens OX=9606 GN=SLC39A7 PE=1 SV=2	17	5	23	5	50.1	SLC39A7	83659.1	53725.6	68692.4	4.505e+07	3.43334e+07	3.96917e+07	3.17269e+07	3.20756e+07	3.19013e+07	3.9623e+07	3.18326e+07
High	Master Protein	P43003	Excitatory amino acid transporter 1 OS=Homo sapiens OX=9606 GN=SLC1A3 PE=1 SV=1	12	4	23	3	59.5	SLC1A3	1.20023e+06	661362	930798	6.93431e+07	4.36897e+07	5.65164e+07	4.09461e+07	5.97102e+07	5.03282e+07	5.55856e+07	4.93974e+07
High	Master Protein	O43164	E3 ubiquitin-protein ligase Praja-2 OS=Homo sapiens OX=9606 GN=PJA2 PE=1 SV=4	18	7	23	5	78.2	PJA2	184949	52921.1	118935	1.169e+07	7628536	9.65928e+06	5.23018e+06	5.98104e+06	5.60561e+06	9.54034e+06	5.48667e+06
High	Master Protein	P83731	Large ribosomal subunit protein eL24 OS=Homo sapiens OX=9606 GN=RPL24 PE=1 SV=1	24	4	23	4	17.8	RPL24	3.74166e+06	4.47795e+06	4.10981e+06	3.45709e+07	2.83308e+07	3.14509e+07	2.90136e+07	3.76857e+07	3.33496e+07	2.73411e+07	2.92398e+07
High	Master Protein	Q9UDR5	Alpha-aminoadipic semialdehyde synthase, mitochondrial OS=Homo sapiens OX=9606 GN=AASS PE=1 SV=1	16	10	23	10	102.1	AASS	397327	284480	340903	7.23339e+06	5.74977e+06	6.49158e+06	5.36209e+06	5.96302e+06	5.66256e+06	6.15068e+06	5.32166e+06
High	Master Protein	Q8N1F8	Serine/threonine-protein kinase 11-interacting protein OS=Homo sapiens OX=9606 GN=STK11IP PE=1 SV=4	14	11	23	11	120.2	STK11IP	978416	744244	861330	1.5991e+07	1.37117e+07	1.48514e+07	1.0998e+07	1.18127e+07	1.14053e+07	1.399e+07	1.0544e+07
High	Master Protein	Q8TCT9	Minor histocompatibility antigen H13 OS=Homo sapiens OX=9606 GN=HM13 PE=1 SV=1	13	5	23	5	41.5	HM13	624882	293092	458987	3.1131e+07	3.10143e+07	3.10727e+07	1.89705e+07	2.34536e+07	2.1212e+07	3.06137e+07	2.07531e+07
High	Master Protein	Q8WTW3	Conserved oligomeric Golgi complex subunit 1 OS=Homo sapiens OX=9606 GN=COG1 PE=1 SV=1	12	8	23	8	108.9	COG1	257308	445349	351328	2.00378e+07	1.56467e+07	1.78423e+07	1.2441e+07	1.43123e+07	1.33766e+07	1.74909e+07	1.30253e+07
High	Master Protein	O75122	CLIP-associating protein 2 OS=Homo sapiens OX=9606 GN=CLASP2 PE=1 SV=3	9	9	23	9	141	CLASP2	957539	926037	941788	4.44942e+06	3.31753e+06	3.88348e+06	2.13876e+06	2.86249e+06	2.50063e+06	2.94169e+06	1.55884e+06
High	Master Protein	P22392	Nucleoside diphosphate kinase B OS=Homo sapiens OX=9606 GN=NME2 PE=1 SV=1	32	4	23	4	17.3	NME2	13998256	7.83025e+06	1.09143e+07	31693189	2.6965e+07	2.93291e+07	2.59416e+07	1.90362e+07	2.24889e+07	1.84149e+07	1.15747e+07
High	Master Protein	P08708	Small ribosomal subunit protein eS17 OS=Homo sapiens OX=9606 GN=RPS17 PE=1 SV=2	59	7	23	7	15.5	RPS17	7.01499e+06	6.00011e+06	6.50755e+06	3.96111e+07	3.45245e+07	3.70678e+07	3.13898e+07	3.3499e+07	3.24444e+07	3.05603e+07	2.59368e+07
High	Master Protein	P17812	CTP synthase 1 OS=Homo sapiens OX=9606 GN=CTPS1 PE=1 SV=2	14	7	23	7	66.6	CTPS1	1.50312e+06	789880	1.1465e+06	1.73917e+07	1.84812e+07	1.79365e+07	1.71254e+07	1.63908e+07	1.67581e+07	1.679e+07	1.56116e+07
High	Master Protein	Q15717	ELAV-like protein 1 OS=Homo sapiens OX=9606 GN=ELAVL1 PE=1 SV=2	14	4	23	4	36.1	ELAVL1	5.52044e+06	4.0133e+06	4.76687e+06	1.50983e+07	1.3895e+07	1.44966e+07	9.09673e+06	11944235	1.05205e+07	9.72978e+06	5.75361e+06
High	Master Protein	Q8N5Z5	BTB/POZ domain-containing protein KCTD17 OS=Homo sapiens OX=9606 GN=KCTD17 PE=1 SV=3	32	5	22	5	35.6				#DIV/0!	1.84873e+07	1.93548e+07	1.89211e+07	1.62143e+07	1.81112e+07	1.71627e+07	#DIV/0!	#DIV/0!
High	Master Protein	Q8IUF1	Zinc-regulated GTPase metalloprotein activator 1B OS=Homo sapiens OX=9606 GN=ZNG1B PE=2 SV=1	31	8	22	8	44	ZNG1B	296094	1.0841e+06	690097	2.36437e+07	2.08035e+07	2.22236e+07	2.03065e+07	2.19241e+07	2.11153e+07	2.15335e+07	2.04252e+07
High	Master Protein	P61106	Ras-related protein Rab-14 OS=Homo sapiens OX=9606 GN=RAB14 PE=1 SV=4	47	8	22	7	23.9	RAB14	3.3311e+06	2.92343e+06	3.12726e+06	4.51652e+07	3.0827e+07	3.79961e+07	2.53031e+07	3.31694e+07	2.92362e+07	3.48688e+07	2.6109e+07
High	Master Protein	Q9UHB9	Signal recognition particle subunit SRP68 OS=Homo sapiens OX=9606 GN=SRP68 PE=1 SV=2	19	7	22	7	70.7	SRP68	1.70736e+06	1.611e+06	1.65918e+06	5.42225e+06	4.31297e+06	4.86761e+06	4.04108e+06	4.50943e+06	4.27525e+06	3.20843e+06	2.61608e+06
High	Master Protein	O75027	Iron-sulfur clusters transporter ABCB7, mitochondrial OS=Homo sapiens OX=9606 GN=ABCB7 PE=1 SV=2	13	10	22	10	82.6	ABCB7	532530	428120	480325	1.28768e+07	1.39797e+07	1.34283e+07	8.40728e+06	1.03029e+07	9.35511e+06	1.29479e+07	8.87479e+06
High	Master Protein	P61160	Actin-related protein 2 OS=Homo sapiens OX=9606 GN=ACTR2 PE=1 SV=1	21	6	22	6	44.7	ACTR2	4.28559e+06	1.88921e+06	3.0874e+06	1.6589e+07	1.28166e+07	1.47028e+07	9.69923e+06	1.05482e+07	1.01237e+07	1.16154e+07	7.03632e+06
High	Master Protein	Q5VZL5	Zinc finger MYM-type protein 4 OS=Homo sapiens OX=9606 GN=ZMYM4 PE=1 SV=1	7	9	22	8	172.7	ZMYM4			#DIV/0!	1.75786e+07	1.26565e+07	1.51175e+07	1.1599e+07	1.37149e+07	1.26569e+07	#DIV/0!	#DIV/0!
High	Master Protein	Q9UKF6	Cleavage and polyadenylation specificity factor subunit 3 OS=Homo sapiens OX=9606 GN=CPSF3 PE=1 SV=1	8	5	22	5	77.4	CPSF3	5.504e+06	3.70933e+06	4.60667e+06	2.14219e+07	1.59009e+07	1.86614e+07	1.45032e+07	1.62572e+07	1.53802e+07	1.40547e+07	1.07735e+07
High	Master Protein	P04439	HLA class I histocompatibility antigen, A alpha chain OS=Homo sapiens OX=9606 GN=HLA-A PE=1 SV=2	26	7	22	3	40.8	HLA-A	2.86883e+06	1.02593e+06	1.94738e+06	2.1074e+07	1.48907e+07	1.79823e+07	1.16861e+07	1.29501e+07	1.23181e+07	1.60349e+07	1.03707e+07
High	Master Protein	Q9BWM7	Sideroflexin-3 OS=Homo sapiens OX=9606 GN=SFXN3 PE=1 SV=3	30	7	22	5	35.5	SFXN3	185798	132919	159358	7.3976e+06	3.66934e+06	5.53347e+06	2.7603e+06	4.19578e+06	3.47804e+06	5.37412e+06	3.31868e+06
High	Master Protein	P62244	Small ribosomal subunit protein uS8 OS=Homo sapiens OX=9606 GN=RPS15A PE=1 SV=2	37	5	22	5	14.8	RPS15A	2.45814e+06	1542216	2.00018e+06	1.95983e+07	1.99997e+07	1.9799e+07	1.37149e+07	1.54516e+07	1.45833e+07	1.77988e+07	1.25831e+07
High	Master Protein	A0AVF1	Intraflagellar transport protein 56 OS=Homo sapiens OX=9606 GN=IFT56 PE=1 SV=1	20	9	22	9	64.1	IFT56	1.04037e+06	483989	762177	1.60842e+07	1.26441e+07	1.43642e+07	1.01629e+07	1.14018e+07	1.07823e+07	1.3602e+07	1.00202e+07
High	Master Protein	P63096	Guanine nucleotide-binding protein G(i) subunit alpha-1 OS=Homo sapiens OX=9606 GN=GNAI1 PE=1 SV=2	29	8	22	3	40.3	GNAI1		556384	556384	4903762	3.13354e+06	4.01865e+06	1.82633e+06	2494084	2.16021e+06	3.46227e+06	1.60382e+06
High	Master Protein	O76071	Probable cytosolic iron-sulfur protein assembly protein CIAO1 OS=Homo sapiens OX=9606 GN=CIAO1 PE=1 SV=1	27	8	21	8	37.8	CIAO1	381763	152117	266940	1.8789e+07	1.75245e+07	1.81567e+07	1.23902e+07	1.69888e+07	1.46895e+07	1.78898e+07	1.44226e+07
High	Master Protein	P08621	U1 small nuclear ribonucleoprotein 70 kDa OS=Homo sapiens OX=9606 GN=SNRNP70 PE=1 SV=2	17	8	21	8	51.5	SNRNP70	1.98894e+06	1.74293e+06	1.86594e+06	4.87218e+07	47528940	4.81254e+07	3.40403e+07	4.0646e+07	3.73432e+07	4.62595e+07	3.54772e+07
High	Master Protein	Q96CW5	Gamma-tubulin complex component 3 OS=Homo sapiens OX=9606 GN=TUBGCP3 PE=1 SV=2	14	10	21	10	103.5	TUBGCP3	482426	912407	697416	7.80052e+06	3.69735e+06	5.74893e+06	5.69231e+06	4.29815e+06	4.99523e+06	5.05152e+06	4.29782e+06
High	Master Protein	Q96NB2	Sideroflexin-2 OS=Homo sapiens OX=9606 GN=SFXN2 PE=1 SV=2	31	7	21	7	36.2	SFXN2	426154	393312	409733	2.15956e+07	1.93308e+07	2.04632e+07	1.46786e+07	1.88952e+07	1.67869e+07	2.00535e+07	1.63772e+07
High	Master Protein	P24468	COUP transcription factor 2 OS=Homo sapiens OX=9606 GN=NR2F2 PE=1 SV=1	20	6	21	2	45.5	NR2F2	281519	375334	328427	1.5677e+07	1.26258e+07	14151417	1.16819e+07	1.35699e+07	1.26259e+07	1.3823e+07	1.22975e+07
High	Master Protein	P62277	Small ribosomal subunit protein uS15 OS=Homo sapiens OX=9606 GN=RPS13 PE=1 SV=2	40	7	21	7	17.2	RPS13	6.28801e+06	5.57931e+06	5.93366e+06	3.5807e+07	2.46227e+07	3.02148e+07	2.43295e+07	2.26457e+07	2.34876e+07	2.42812e+07	1.75539e+07
High	Master Protein	P06280	Alpha-galactosidase A OS=Homo sapiens OX=9606 GN=GLA PE=1 SV=1	19	6	21	6	48.7	GLA	1.59955e+06	275808	937678	1.46286e+07	1.16597e+07	1.31441e+07	1.03771e+07	1.16933e+07	1.10352e+07	1.22064e+07	1.00976e+07
High	Master Protein	Q8NF37	Lysophosphatidylcholine acyltransferase 1 OS=Homo sapiens OX=9606 GN=LPCAT1 PE=1 SV=2	19	7	21	7	59.1	LPCAT1	845275	174295	509785	3.64452e+07	38365397	3.74053e+07	3.2564e+07	3.3366e+07	3.2965e+07	3.68955e+07	3.24552e+07
High	Master Protein	Q9UPT5	Exocyst complex component 7 OS=Homo sapiens OX=9606 GN=EXOC7 PE=1 SV=3	11	7	21	7	83.3	EXOC7			#DIV/0!	1.01782e+07	9.79713e+06	9.98766e+06	7.72484e+06	7.2239e+06	7.47437e+06	#DIV/0!	#DIV/0!
High	Master Protein	Q9H8M5	Metal transporter CNNM2 OS=Homo sapiens OX=9606 GN=CNNM2 PE=1 SV=2	16	10	21	8	96.6	CNNM2			#DIV/0!	1.19323e+07	1.02211e+07	1.10767e+07	9.50602e+06	9.31818e+06	9.4121e+06	#DIV/0!	#DIV/0!
High	Master Protein	Q8NC51	SERPINE1 mRNA-binding protein 1 OS=Homo sapiens OX=9606 GN=SERBP1 PE=1 SV=2	19	7	21	7	44.9	SERBP1	6.08275e+06	3.30868e+06	4.69572e+06	1.02306e+07	1.08023e+07	1.05165e+07	9.18884e+06	1.07874e+07	9.98812e+06	5.82074e+06	5.2924e+06
High	Master Protein	O60825	6-phosphofructo-2-kinase/fructose-2,6-bisphosphatase 2 OS=Homo sapiens OX=9606 GN=PFKFB2 PE=1 SV=2	15	7	21	3	58.4	PFKFB2			#DIV/0!	6.44829e+06	4.29834e+06	5.37331e+06	2.52974e+06	3.45167e+06	2.9907e+06	#DIV/0!	#DIV/0!
High	Master Protein	P12814	Alpha-actinin-1 OS=Homo sapiens OX=9606 GN=ACTN1 PE=1 SV=2	11	8	21	3	103	ACTN1	8.18222e+06	5.13696e+06	6.65959e+06	1.46878e+07	8.16744e+06	1.14276e+07	5.58738e+06	8.24063e+06	6.914e+06	4.76804e+06	254413
High	Master Protein	P33991	DNA replication licensing factor MCM4 OS=Homo sapiens OX=9606 GN=MCM4 PE=1 SV=5	15	9	21	9	96.5	MCM4	1.32237e+06	1.45908e+06	1.39072e+06	1.17989e+07	8.49159e+06	1.01452e+07	6.39861e+06	8.94287e+06	7.67074e+06	8.75453e+06	6.28002e+06
High	Master Protein	P46779	Large ribosomal subunit protein eL28 OS=Homo sapiens OX=9606 GN=RPL28 PE=1 SV=3	23	5	21	5	15.7	RPL28	3.68623e+06	4.19646e+06	3.94134e+06	2.28137e+07	1.66251e+07	1.97194e+07	1.23258e+07	14109877	1.32178e+07	1.5778e+07	9.27647e+06
High	Master Protein	Q8NEW0	Zinc transporter 7 OS=Homo sapiens OX=9606 GN=SLC30A7 PE=1 SV=1	16	5	21	5	41.6	SLC30A7			#DIV/0!	3.58884e+07	3.40429e+07	3.49656e+07	3.29259e+07	3.70677e+07	3.49968e+07	#DIV/0!	#DIV/0!
High	Master Protein	Q96J84	Kin of IRRE-like protein 1 OS=Homo sapiens OX=9606 GN=KIRREL1 PE=1 SV=2	23	10	21	10	83.5	KIRREL1	307079	580656	443867	8.38025e+06	7.43587e+06	7.90806e+06	6.48012e+06	7.78278e+06	7.13145e+06	7.46419e+06	6.68758e+06
High	Master Protein	O75431	Metaxin-2 OS=Homo sapiens OX=9606 GN=MTX2 PE=1 SV=1	27	6	21	6	29.7	MTX2	151041	146924	148983	1.70868e+07	1.34462e+07	1.52665e+07	1.46023e+07	2.007e+07	1.73361e+07	1.51175e+07	1.71872e+07
High	Master Protein	Q8WWY3	U4/U6 small nuclear ribonucleoprotein Prp31 OS=Homo sapiens OX=9606 GN=PRPF31 PE=1 SV=2	16	5	21	5	55.4	PRPF31	650089	390769	520429	9.52367e+06	1.15826e+07	1.05531e+07	8.82921e+06	8.62239e+06	8.7258e+06	1.00327e+07	8.20537e+06
High	Master Protein	Q92667	A-kinase anchor protein 1, mitochondrial OS=Homo sapiens OX=9606 GN=AKAP1 PE=1 SV=1	13	7	21	7	97.3	AKAP1	630877	386887	508882	5.76935e+06	5.65179e+06	5.71057e+06	4.77966e+06	3.55294e+06	4.1663e+06	5.20169e+06	3.65742e+06
High	Master Protein	Q9NWW5	Ceroid-lipofuscinosis neuronal protein 6 OS=Homo sapiens OX=9606 GN=CLN6 PE=1 SV=1	22	5	21	5	35.9	CLN6	915588	499101	707344	6.28322e+07	3.91383e+07	5.09853e+07	34201983	4.05755e+07	3.73887e+07	5.02779e+07	3.66814e+07
High	Master Protein	Q13049	E3 ubiquitin-protein ligase TRIM32 OS=Homo sapiens OX=9606 GN=TRIM32 PE=1 SV=2	15	7	21	7	71.9	TRIM32			#DIV/0!	2.21011e+07	2.19234e+07	2.20122e+07	2.03149e+07	2.14437e+07	2.08793e+07	#DIV/0!	#DIV/0!
High	Master Protein	Q96KP1	Exocyst complex component 2 OS=Homo sapiens OX=9606 GN=EXOC2 PE=1 SV=1	13	8	21	8	104	EXOC2	649393	272476	460934	1.65021e+07	1.21192e+07	1.43106e+07	1.08589e+07	9.94816e+06	1.04035e+07	1.38497e+07	9.9426e+06
High	Master Protein	Q9BTT6	Leucine-rich repeat-containing protein 1 OS=Homo sapiens OX=9606 GN=LRRC1 PE=1 SV=1	18	7	21	5	59.2	LRRC1	257856	61592.5	159724	9.32041e+06	6.64575e+06	7.98308e+06	6.37369e+06	7.88306e+06	7.12838e+06	7.82336e+06	6.96865e+06
High	Master Protein	P06733	Alpha-enolase OS=Homo sapiens OX=9606 GN=ENO1 PE=1 SV=2	28	8	21	8	47.1	ENO1	6.73728e+06	2.88075e+06	4.80902e+06	2.51566e+07	2.42406e+07	2.46986e+07	7.84157e+06	1.40342e+07	1.09379e+07	1.98896e+07	6.12889e+06
High	Master Protein	Q16875	6-phosphofructo-2-kinase/fructose-2,6-bisphosphatase 3 OS=Homo sapiens OX=9606 GN=PFKFB3 PE=1 SV=1	20	9	21	5	59.6	PFKFB3	300560	55876.8	178218	2.25195e+07	1.59588e+07	1.92392e+07	1.12985e+07	1.51704e+07	1.32344e+07	1.90609e+07	1.30562e+07
High	Master Protein	Q9UBB6	Neurochondrin OS=Homo sapiens OX=9606 GN=NCDN PE=1 SV=1	14	9	21	9	78.8	NCDN	714288	360886	537587	8.21639e+06	8.44176e+06	8.32908e+06	8.20421e+06	8.19593e+06	8.20007e+06	7.79149e+06	7.66249e+06
High	Master Protein	Q9UJ14	Glutathione hydrolase 7 OS=Homo sapiens OX=9606 GN=GGT7 PE=1 SV=2	20	8	21	8	70.4	GGT7	81460.6	95942	88701.3	7.30525e+06	3.34308e+06	5.32417e+06	6.12628e+06	5.01541e+06	5.57085e+06	5.23546e+06	5.48214e+06
High	Master Protein	Q13363	C-terminal-binding protein 1 OS=Homo sapiens OX=9606 GN=CTBP1 PE=1 SV=2	26	7	21	7	47.5	CTBP1	1.35783e+06	2.14015e+06	1.74899e+06	1.76257e+07	1.72776e+07	1.74517e+07	1.37795e+07	1.60693e+07	1.49244e+07	1.57027e+07	1.31755e+07
High	Master Protein	Q969N2	GPI transamidase component PIG-T OS=Homo sapiens OX=9606 GN=PIGT PE=1 SV=1	17	9	21	9	65.7	PIGT	159924	18665.3	89294.8	2.23716e+07	1.87266e+07	2.05491e+07	1.62804e+07	1.73243e+07	1.68024e+07	2.04598e+07	1.67131e+07
High	Master Protein	Q13435	Splicing factor 3B subunit 2 OS=Homo sapiens OX=9606 GN=SF3B2 PE=1 SV=2	9	6	21	6	100.2	SF3B2	385745	391608	388677	1.59176e+07	9.97411e+06	1.29459e+07	9.05917e+06	1.16463e+07	1.03528e+07	1.25572e+07	9.96408e+06
High	Master Protein	P14649	Myosin light chain 6B OS=Homo sapiens OX=9606 GN=MYL6B PE=1 SV=1	30	5	21	3	22.8	MYL6B	1.26438e+06	722741	993562	3.4714e+06	1.97576e+06	2.72358e+06	1.71445e+06	1.93269e+06	1.82357e+06	1.73002e+06	830006
High	Master Protein	P61289	Proteasome activator complex subunit 3 OS=Homo sapiens OX=9606 GN=PSME3 PE=1 SV=1	35	7	21	7	29.5	PSME3	932024	604624	768324	2.33982e+07	1.8149e+07	2.07736e+07	1.71251e+07	2.09602e+07	1.90427e+07	2.00052e+07	1.82743e+07
High	Master Protein	Q9UBS4	DnaJ homolog subfamily B member 11 OS=Homo sapiens OX=9606 GN=DNAJB11 PE=1 SV=1	26	7	20	7	40.5	DNAJB11	4.14555e+06	2.55434e+06	3.34994e+06	4.83839e+07	3.22775e+07	4.03307e+07	2.5804e+07	3.31716e+07	2.94878e+07	3.69808e+07	2.61378e+07
High	Master Protein	O75477	Erlin-1 OS=Homo sapiens OX=9606 GN=ERLIN1 PE=1 SV=2	28	7	20	4	39.1	ERLIN1			#DIV/0!	3.95698e+06	2.53838e+06	3.24768e+06	6.47566e+06	7.36656e+06	6.92111e+06	#DIV/0!	#DIV/0!
High	Master Protein	P50914	Large ribosomal subunit protein eL14 OS=Homo sapiens OX=9606 GN=RPL14 PE=1 SV=4	25	5	20	5	23.4	RPL14	1.50484e+07	1.06822e+07	1.28653e+07	9.06073e+07	6.529e+07	7.79487e+07	4.47174e+07	6.70718e+07	5.58946e+07	6.50833e+07	4.30293e+07
High	Master Protein	Q14165	Malectin OS=Homo sapiens OX=9606 GN=MLEC PE=1 SV=1	33	7	20	7	32.2	MLEC	361708	478434	420071	4.00738e+07	20699365	3.03866e+07	1.95955e+07	2.83638e+07	2.39797e+07	2.99665e+07	2.35596e+07
High	Master Protein	Q13438	Protein OS-9 OS=Homo sapiens OX=9606 GN=OS9 PE=1 SV=1	21	9	20	9	75.5	OS9	455759	194468	325114	1.76648e+07	1.4675e+07	1.61699e+07	1.33049e+07	1.35671e+07	1.3436e+07	1.58448e+07	1.31109e+07
High	Master Protein	Q9BXW7	Haloacid dehalogenase-like hydrolase domain-containing 5 OS=Homo sapiens OX=9606 GN=HDHD5 PE=1 SV=1	32	9	20	9	46.3	HDHD5	1.75292e+06	523456	1.13819e+06	1.96443e+07	1.58666e+07	1.77554e+07	1.38383e+07	1.33296e+07	1.3584e+07	1.66173e+07	1.24458e+07
High	Master Protein	Q53R41	FAST kinase domain-containing protein 1, mitochondrial OS=Homo sapiens OX=9606 GN=FASTKD1 PE=1 SV=1	9	5	20	5	97.3	FASTKD1	372114	446561	409338	1.21046e+07	9.09221e+06	1.05984e+07	7.78254e+06	7.81241e+06	7.79748e+06	1.01891e+07	7.38814e+06
High	Master Protein	A2RRP1	NBAS subunit of NRZ tethering complex OS=Homo sapiens OX=9606 GN=NBAS PE=1 SV=2	5	10	20	10	268.4	NBAS	82779.2	66831.3	74805.3	6.12858e+06	4.68485e+06	5.40672e+06	3.5046e+06	3.43323e+06	3.46891e+06	5.33191e+06	3.39411e+06
High	Master Protein	O00459	Phosphatidylinositol 3-kinase regulatory subunit beta OS=Homo sapiens OX=9606 GN=PIK3R2 PE=1 SV=2	14	8	20	7	81.5	PIK3R2	497850	399790	448820	1.24308e+07	7643801	1.00373e+07	5.87483e+06	8.3694e+06	7.12212e+06	9.58849e+06	6.6733e+06
High	Master Protein	O00148	ATP-dependent RNA helicase DDX39A OS=Homo sapiens OX=9606 GN=DDX39A PE=1 SV=2	18	7	20	7	49.1	DDX39A	1.42513e+07	1.29763e+07	1.36138e+07	5.41753e+07	4.33736e+07	4.87744e+07	3.29275e+07	4.38094e+07	3.83684e+07	3.51607e+07	2.47547e+07
High	Master Protein	O94991	SLIT and NTRK-like protein 5 OS=Homo sapiens OX=9606 GN=SLITRK5 PE=1 SV=2	10	7	20	7	107.4	SLITRK5		117196	117196	1.10062e+07	1.30995e+07	1.20529e+07	1.36014e+07	1.31215e+07	1.33614e+07	1.19357e+07	1.32442e+07
High	Master Protein	Q13409	Cytoplasmic dynein 1 intermediate chain 2 OS=Homo sapiens OX=9606 GN=DYNC1I2 PE=1 SV=3	16	7	20	7	71.4	DYNC1I2	1.3812e+06	609787	995493	1.79675e+07	1.13713e+07	1.46694e+07	1.37631e+07	1.46867e+07	1.42249e+07	1.36739e+07	1.32294e+07
High	Master Protein	O14893	Gem-associated protein 2 OS=Homo sapiens OX=9606 GN=GEMIN2 PE=1 SV=1	30	5	20	5	31.6	GEMIN2			#DIV/0!	1.38252e+07	1.29125e+07	1.33688e+07	1.12415e+07	1.38164e+07	1.2529e+07	#DIV/0!	#DIV/0!
High	Master Protein	Q13247	Serine/arginine-rich splicing factor 6 OS=Homo sapiens OX=9606 GN=SRSF6 PE=1 SV=2	13	6	20	6	39.6	SRSF6	3.24225e+06	2.80671e+06	3.02448e+06	1.57596e+07	1.20997e+07	1.39297e+07	1.05855e+07	13361194	1.19734e+07	1.09052e+07	8.94888e+06
High	Master Protein	P23458	Tyrosine-protein kinase JAK1 OS=Homo sapiens OX=9606 GN=JAK1 PE=1 SV=2	8	8	20	8	133.2	JAK1	447484	749934	598709	20277766	1.57054e+07	1.79916e+07	1.29248e+07	1.1999e+07	1.24619e+07	1.73929e+07	1.18632e+07
High	Master Protein	Q9NXV2	BTB/POZ domain-containing protein KCTD5 OS=Homo sapiens OX=9606 GN=KCTD5 PE=1 SV=1	44	6	20	6	26.1	KCTD5			#DIV/0!	50363329	6.48071e+07	5.75852e+07	5.69012e+07	6.02818e+07	58591477	#DIV/0!	#DIV/0!
High	Master Protein	Q07157	Tight junction protein ZO-1 OS=Homo sapiens OX=9606 GN=TJP1 PE=1 SV=3	7	8	20	8	195.3	TJP1	2.76759e+06	2.08101e+06	2.4243e+06	5.65042e+06	4.8717e+06	5.26106e+06	2.71178e+06	2.99913e+06	2.85546e+06	2.83676e+06	431156
High	Master Protein	Q8IY17	Patatin-like phospholipase domain-containing protein 6 OS=Homo sapiens OX=9606 GN=PNPLA6 PE=1 SV=3	6	6	20	6	150.9	PNPLA6	447596	521904	484750	1.16884e+07	9.9586e+06	1.08235e+07	7.68198e+06	7.0787e+06	7.38034e+06	1.03387e+07	6.89559e+06
High	Master Protein	P15735	Phosphorylase b kinase gamma catalytic chain, liver/testis isoform OS=Homo sapiens OX=9606 GN=PHKG2 PE=1 SV=1	20	8	20	8	46.4	PHKG2	1.66794e+06	1.07001e+06	1.36898e+06	2.06939e+07	1.72649e+07	1.89794e+07	1.12426e+07	14140055	1.26913e+07	1.76104e+07	1.13223e+07
High	Master Protein	P25398	Small ribosomal subunit protein eS12 OS=Homo sapiens OX=9606 GN=RPS12 PE=1 SV=3	54	6	20	6	14.5	RPS12	6.01613e+06	2.13701e+06	4.07657e+06	3.95055e+07	4.04301e+07	3.99678e+07	3.20406e+07	3.38839e+07	3.29622e+07	3.58912e+07	2.88857e+07
High	Master Protein	Q9Y5Q8	General transcription factor 3C polypeptide 5 OS=Homo sapiens OX=9606 GN=GTF3C5 PE=1 SV=2	18	7	20	7	59.5	GTF3C5	409873	225762	317818	6.50042e+06	5.32544e+06	5.91293e+06	3.79466e+06	6.42539e+06	5.11003e+06	5.59511e+06	4.79221e+06
High	Master Protein	P35658	Nuclear pore complex protein Nup214 OS=Homo sapiens OX=9606 GN=NUP214 PE=1 SV=2	6	8	19	8	213.5	NUP214	4.52698e+06	1.5651e+06	3.04604e+06	1.06322e+07	9.29461e+06	9.96341e+06	8.02108e+06	8.49613e+06	8.25861e+06	6.91737e+06	5.21257e+06
High	Master Protein	Q12792	Twinfilin-1 OS=Homo sapiens OX=9606 GN=TWF1 PE=1 SV=3	19	6	19	6	40.3	TWF1	3.43158e+06	2.72181e+06	3.0767e+06	1.63799e+07	12558235	1.4469e+07	6826607	8.82967e+06	7.82814e+06	1.13923e+07	4.75144e+06
High	Master Protein	Q12906	Interleukin enhancer-binding factor 3 OS=Homo sapiens OX=9606 GN=ILF3 PE=1 SV=3	13	10	19	10	95.3	ILF3	1.11075e+06	658302	884527	1.40313e+07	1.0612e+07	1.23217e+07	9.6651e+06	1.24001e+07	1.10326e+07	1.14371e+07	1.01481e+07
High	Master Protein	Q6PGP7	Superkiller complex protein 3 OS=Homo sapiens OX=9606 GN=SKIC3 PE=1 SV=1	6	9	19	9	175.4	SKIC3	138099	310482	224291	1.29245e+07	9.71582e+06	1.13202e+07	7.5582e+06	7.31242e+06	7.43531e+06	1.10959e+07	7.21102e+06
High	Master Protein	P21964	Catechol O-methyltransferase OS=Homo sapiens OX=9606 GN=COMT PE=1 SV=2	42	7	19	7	30	COMT	333425		333425	6.72897e+06	2.19063e+07	1.43176e+07	2.16206e+07	1.83862e+07	2.00034e+07	1.39842e+07	1.967e+07
High	Master Protein	Q96PU8	KH domain-containing RNA-binding protein QKI OS=Homo sapiens OX=9606 GN=QKI PE=1 SV=1	27	6	19	6	37.6	QKI	712581	701511	707046	1.65572e+07	12850172	1.47037e+07	9.12198e+06	1.18157e+07	1.04688e+07	1.39966e+07	9.76179e+06
High	Master Protein	P62906	Large ribosomal subunit protein uL1 OS=Homo sapiens OX=9606 GN=RPL10A PE=1 SV=2	36	8	19	8	24.8	RPL10A	7.60681e+06	6.96769e+06	7.28725e+06	55797360	3.51421e+07	4.54697e+07	2.87818e+07	4.68554e+07	3.78186e+07	38182472	3.05313e+07
High	Master Protein	P22061	Protein-L-isoaspartate(D-aspartate) O-methyltransferase OS=Homo sapiens OX=9606 GN=PCMT1 PE=1 SV=4	43	5	19	5	24.6	PCMT1	6.81281e+06	5.71613e+06	6.26447e+06	2.10711e+07	1.70572e+07	1.90641e+07	1.42818e+07	1.75419e+07	1.59119e+07	1.27997e+07	9.64738e+06
High	Master Protein	Q93100	Phosphorylase b kinase regulatory subunit beta OS=Homo sapiens OX=9606 GN=PHKB PE=1 SV=3	11	9	19	9	124.8	PHKB	477953	368691	423322	1.36114e+07	9.26692e+06	1.14392e+07	8.57804e+06	1.09891e+07	9.78355e+06	1.10159e+07	9.36023e+06
High	Master Protein	P43246	DNA mismatch repair protein Msh2 OS=Homo sapiens OX=9606 GN=MSH2 PE=1 SV=1	7	6	19	6	104.7	MSH2			#DIV/0!	7.85196e+06	5.63625e+06	6.7441e+06	5.57182e+06	5.03133e+06	5.30158e+06	#DIV/0!	#DIV/0!
High	Master Protein	O14929	Histone acetyltransferase type B catalytic subunit OS=Homo sapiens OX=9606 GN=HAT1 PE=1 SV=2	20	6	19	6	49.5	HAT1	1.02058e+06		1.02058e+06	2.11928e+07	1.88189e+07	2.00058e+07	2.0062e+07	2.35088e+07	2.17854e+07	1.89852e+07	2.07648e+07
High	Master Protein	Q9UM00	Calcium load-activated calcium channel OS=Homo sapiens OX=9606 GN=TMCO1 PE=1 SV=2	20	5	19	5	27.1	TMCO1	1.32942e+06	820608	1.07502e+06	4.99447e+07	3.56488e+07	4.27968e+07	3.83552e+07	3.43776e+07	3.63664e+07	4.17218e+07	3.52914e+07
High	Master Protein	P22234	Bifunctional phosphoribosylaminoimidazole carboxylase/phosphoribosylaminoimidazole succinocarboxamide synthetase OS=Homo sapiens OX=9606 GN=PAICS PE=1 SV=3	20	6	19	6	47	PAICS	1.60832e+06	714750	1.16153e+06	5.75383e+06	7.21317e+06	6.4835e+06	4.79569e+06	5.48099e+06	5.13834e+06	5.32197e+06	3.97681e+06
High	Master Protein	Q9NRG9	Aladin OS=Homo sapiens OX=9606 GN=AAAS PE=1 SV=1	16	7	19	7	59.5	AAAS	481856	1.04718e+06	764520	2.0477e+07	1.62432e+07	1.83601e+07	1.17297e+07	1.40669e+07	1.28983e+07	1.75956e+07	1.21338e+07
High	Master Protein	Q8WWC4	m-AAA protease-interacting protein 1, mitochondrial OS=Homo sapiens OX=9606 GN=MAIP1 PE=1 SV=1	23	6	19	6	32.5	MAIP1	1.32475e+06	832009	1.07838e+06	2.00385e+07	1.14374e+07	1.5738e+07	1.05743e+07	1.77786e+07	1.41765e+07	1.46596e+07	1.30981e+07
High	Master Protein	Q9UPY3	Endoribonuclease Dicer OS=Homo sapiens OX=9606 GN=DICER1 PE=1 SV=3	7	10	19	10	218.5	DICER1	151146	83213.3	117179	5.52856e+06	6.54656e+06	6.03756e+06	6.31738e+06	6.32324e+06	6.32031e+06	5.92038e+06	6.20313e+06
High	Master Protein	O75592	E3 ubiquitin-protein ligase MYCBP2 OS=Homo sapiens OX=9606 GN=MYCBP2 PE=1 SV=4	3	12	19	12	513.3	MYCBP2	1.82599e+06	1.68611e+06	1.75605e+06	1.10463e+07	8.39868e+06	9.72247e+06	5.09206e+06	5.03121e+06	5.06163e+06	7.96641e+06	3.30558e+06
High	Master Protein	P23588	Eukaryotic translation initiation factor 4B OS=Homo sapiens OX=9606 GN=EIF4B PE=1 SV=2	14	6	19	6	69.1	EIF4B	746667	678858	712762	9.81894e+06	8.89749e+06	9.35822e+06	5.9013e+06	6.59991e+06	6.25061e+06	8.64546e+06	5.53784e+06
High	Master Protein	Q07021	Complement component 1 Q subcomponent-binding protein, mitochondrial OS=Homo sapiens OX=9606 GN=C1QBP PE=1 SV=1	32	4	19	4	31.3	C1QBP	3.08447e+06	1.05909e+06	2.07178e+06	3.79082e+07	1.92109e+07	2.85595e+07	23121720	32178390	27650055	2.64878e+07	2.55783e+07
High	Master Protein	P12956	X-ray repair cross-complementing protein 6 OS=Homo sapiens OX=9606 GN=XRCC6 PE=1 SV=2	11	5	19	5	69.8	XRCC6	1.88618e+06	1.83485e+06	1.86052e+06	9.43136e+06	9.0861e+06	9.25873e+06	6.72844e+06	8.16991e+06	7.44918e+06	7.39822e+06	5.58866e+06
High	Master Protein	Q9NPL8	Complex I assembly factor TIMMDC1, mitochondrial OS=Homo sapiens OX=9606 GN=TIMMDC1 PE=1 SV=2	31	9	19	9	32.2	TIMMDC1	1.6933e+06	417285	1.05529e+06	2.38065e+07	1.52567e+07	1.95316e+07	1.13544e+07	1.49408e+07	1.31476e+07	1.84763e+07	1.20923e+07
High	Master Protein	P13861	cAMP-dependent protein kinase type II-alpha regulatory subunit OS=Homo sapiens OX=9606 GN=PRKAR2A PE=1 SV=2	30	9	19	9	45.5	PRKAR2A	2.79557e+06	3.01999e+06	2.90778e+06	12305632	1.5683e+07	1.39943e+07	9702420	1.64966e+07	1.30995e+07	1.10865e+07	1.01917e+07
High	Master Protein	Q9H0H0	Integrator complex subunit 2 OS=Homo sapiens OX=9606 GN=INTS2 PE=1 SV=2	7	6	19	6	134.2	INTS2		110576	110576	7.41237e+06	5.25216e+06	6.33226e+06	5.61297e+06	4.94738e+06	5.28017e+06	6.22169e+06	5.1696e+06
High	Master Protein	Q6ZRP7	Sulfhydryl oxidase 2 OS=Homo sapiens OX=9606 GN=QSOX2 PE=1 SV=3	12	6	19	6	77.5	QSOX2			#DIV/0!	9.59431e+06	6.40803e+06	8.00117e+06	7.42906e+06	7.25599e+06	7.34252e+06	#DIV/0!	#DIV/0!
High	Master Protein	Q92600	CCR4-NOT transcription complex subunit 9 OS=Homo sapiens OX=9606 GN=CNOT9 PE=1 SV=1	25	5	19	5	33.6	CNOT9	1.16428e+06	2.02717e+06	1.59572e+06	7.14508e+06	5.15317e+06	6.14913e+06	4.68882e+06	6.96103e+06	5.82493e+06	4.5534e+06	4.2292e+06
High	Master Protein	Q96JG8	Melanoma-associated antigen D4 OS=Homo sapiens OX=9606 GN=MAGED4 PE=1 SV=3	10	8	19	6	81.3	MAGED4; MAGED4B	640275	506092	573184	8.40585e+06	6.38692e+06	7.39638e+06	5.63815e+06	7.84677e+06	6.74246e+06	6.8232e+06	6.16927e+06
High	Master Protein	Q06210	Glutamine--fructose-6-phosphate aminotransferase [isomerizing] 1 OS=Homo sapiens OX=9606 GN=GFPT1 PE=1 SV=3	16	9	19	9	78.8	GFPT1		588802	588802	9.30763e+06	6.35641e+06	7.83202e+06	4.99965e+06	6.04349e+06	5.52157e+06	7.24322e+06	4.93277e+06
High	Master Protein	Q9HC07	Putative divalent cation/proton antiporter TMEM165 OS=Homo sapiens OX=9606 GN=TMEM165 PE=1 SV=1	21	6	19	6	34.9	TMEM165			#DIV/0!	3.46578e+07	2.04057e+07	2.75317e+07	2.18305e+07	1.24496e+07	1.714e+07	#DIV/0!	#DIV/0!
High	Master Protein	Q9UKN8	General transcription factor 3C polypeptide 4 OS=Homo sapiens OX=9606 GN=GTF3C4 PE=1 SV=2	18	10	19	10	91.9	GTF3C4	194103	89251.4	141677	1.62621e+07	1.00205e+07	1.31413e+07	9.1533e+06	1.1635e+07	1.03942e+07	1.29996e+07	1.02525e+07
High	Master Protein	P46020	Phosphorylase b kinase regulatory subunit alpha, skeletal muscle isoform OS=Homo sapiens OX=9606 GN=PHKA1 PE=1 SV=2	6	5	19	5	137.2	PHKA1	225833	478823	352328	8.82988e+06	6.00475e+06	7.41731e+06	6234218	7.25984e+06	6.74703e+06	7.06499e+06	6.3947e+06
High	Master Protein	Q8N0X7	Spartin OS=Homo sapiens OX=9606 GN=SPART PE=1 SV=1	10	6	19	6	72.8	SPART	2.37351e+06	1.98687e+06	2.18019e+06	1.27897e+07	8.93754e+06	1.08636e+07	8.40907e+06	9.55872e+06	8.98389e+06	8.68341e+06	6.80371e+06
High	Master Protein	P12268	Inosine-5'-monophosphate dehydrogenase 2 OS=Homo sapiens OX=9606 GN=IMPDH2 PE=1 SV=2	14	6	19	6	55.8	IMPDH2	4.72171e+06	3.91513e+06	4.31842e+06	1.62012e+07	1.3114e+07	1.46576e+07	9.61765e+06	1.02506e+07	9.93412e+06	1.03392e+07	5.6157e+06
High	Master Protein	O14787	Transportin-2 OS=Homo sapiens OX=9606 GN=TNPO2 PE=1 SV=3	7	6	19	1	101.3	TNPO2			#DIV/0!	557250	350606	453928	254163	384713	319438	#DIV/0!	#DIV/0!
High	Master Protein	P40937	Replication factor C subunit 5 OS=Homo sapiens OX=9606 GN=RFC5 PE=1 SV=1	30	7	19	7	38.5	RFC5	1.56736e+06	1.49313e+06	1.53025e+06	2.0488e+07	1.71338e+07	1.88109e+07	1.37972e+07	1.60083e+07	1.49028e+07	1.72807e+07	1.33725e+07
High	Master Protein	Q5SNT2	Transmembrane protein 201 OS=Homo sapiens OX=9606 GN=TMEM201 PE=1 SV=1	11	6	19	6	72.2	TMEM201	152874	154768	153821	2.56285e+07	2.33915e+07	2.451e+07	1.80811e+07	2.06747e+07	1.93779e+07	2.43562e+07	1.92241e+07
High	Master Protein	O96008	Mitochondrial import receptor subunit TOM40 homolog OS=Homo sapiens OX=9606 GN=TOMM40 PE=1 SV=1	30	7	19	7	37.9	TOMM40			#DIV/0!	7.6288e+06	4.56848e+06	6.09864e+06	4.31278e+06	5.63686e+06	4.97482e+06	#DIV/0!	#DIV/0!
High	Master Protein	Q5H8A4	GPI ethanolamine phosphate transferase 2 OS=Homo sapiens OX=9606 GN=PIGG PE=1 SV=1	9	6	19	6	108.1	PIGG	203275	173029	188152	2.0113e+07	1.29926e+07	1.65528e+07	8.94937e+06	1.08593e+07	9.90435e+06	1.63646e+07	9.7162e+06
High	Master Protein	P83436	Conserved oligomeric Golgi complex subunit 7 OS=Homo sapiens OX=9606 GN=COG7 PE=1 SV=1	12	7	18	7	86.3	COG7	390900	309817	350359	7.23137e+06	6.65914e+06	6.94526e+06	5.19526e+06	5.5262e+06	5.36073e+06	6.5949e+06	5.01037e+06
High	Master Protein	P38606	V-type proton ATPase catalytic subunit A OS=Homo sapiens OX=9606 GN=ATP6V1A PE=1 SV=2	27	9	18	9	68.3	ATP6V1A		789318	789318	1.09374e+07	7.98363e+06	9.46052e+06	9.46121e+06	1.04796e+07	9.9704e+06	8.6712e+06	9.18108e+06
High	Master Protein	P13010	X-ray repair cross-complementing protein 5 OS=Homo sapiens OX=9606 GN=XRCC5 PE=1 SV=3	10	5	18	5	82.7	XRCC5	664052	159051	411552	3.19608e+06	1.71579e+06	2.45594e+06	2.06101e+06	1.87362e+06	1.96731e+06	2.04438e+06	1.55576e+06
High	Master Protein	P98194	Calcium-transporting ATPase type 2C member 1 OS=Homo sapiens OX=9606 GN=ATP2C1 PE=1 SV=3	13	9	18	9	100.5	ATP2C1	736412		736412	1.28318e+07	1.27384e+07	12785093	1.17013e+07	1.34078e+07	1.25546e+07	1.20487e+07	1.18181e+07
High	Master Protein	Q96DZ1	Endoplasmic reticulum lectin 1 OS=Homo sapiens OX=9606 GN=ERLEC1 PE=1 SV=1	27	9	18	9	54.8	ERLEC1	477992		477992	5.55698e+06	8.25843e+06	6.90771e+06	7622635	6.0862e+06	6.85442e+06	6.42971e+06	6.37643e+06
High	Master Protein	Q8NBI6	Xyloside xylosyltransferase 1 OS=Homo sapiens OX=9606 GN=XXYLT1 PE=1 SV=1	18	6	18	6	43.8	XXYLT1		191283	191283	1.42623e+07	8.45091e+06	1.13566e+07	7.10877e+06	9.05711e+06	8.08294e+06	1.11653e+07	7.89166e+06
High	Master Protein	Q86VM9	Zinc finger CCCH domain-containing protein 18 OS=Homo sapiens OX=9606 GN=ZC3H18 PE=1 SV=2	11	8	18	8	106.3	ZC3H18		831320	831320	6.65269e+06	5.4113e+06	6.03199e+06	3.79998e+06	4.26379e+06	4.03189e+06	5.20067e+06	3.20057e+06
High	Master Protein	O60518	Ran-binding protein 6 OS=Homo sapiens OX=9606 GN=RANBP6 PE=1 SV=2	8	8	18	6	124.6	RANBP6		569121	569121	4.81587e+06	5.71961e+06	5.26774e+06	3.81663e+06	3.27706e+06	3.54685e+06	4.69862e+06	2.97772e+06
High	Master Protein	O75534	Cold shock domain-containing protein E1 OS=Homo sapiens OX=9606 GN=CSDE1 PE=1 SV=2	7	5	18	5	88.8	CSDE1	4.18761e+06	4.85812e+06	4.52286e+06	9.2997e+06	8.14427e+06	8.72198e+06	4585611	8.0711e+06	6.32836e+06	4.19912e+06	1.80549e+06
High	Master Protein	P28072	Proteasome subunit beta type-6 OS=Homo sapiens OX=9606 GN=PSMB6 PE=1 SV=4	21	5	18	5	25.3	PSMB6	1.8208e+06	1.7585e+06	1.78965e+06	2.49157e+07	1.70471e+07	2.09814e+07	1.52501e+07	18898027	1.70741e+07	1.91917e+07	1.52844e+07
High	Master Protein	O14545	TRAF-type zinc finger domain-containing protein 1 OS=Homo sapiens OX=9606 GN=TRAFD1 PE=1 SV=1	11	5	18	5	64.8	TRAFD1	823262	354029	588645	5.90549e+06	7.23071e+06	6.5681e+06	6.58868e+06	6.50581e+06	6.54725e+06	5.97946e+06	5.9586e+06
High	Master Protein	Q9C0E2	Exportin-4 OS=Homo sapiens OX=9606 GN=XPO4 PE=1 SV=2	10	8	18	8	130.1	XPO4			#DIV/0!	1.68008e+07	1.46916e+07	1.57462e+07	1.19596e+07	9.71017e+06	1.08349e+07	#DIV/0!	#DIV/0!
High	Master Protein	O15371	Eukaryotic translation initiation factor 3 subunit D OS=Homo sapiens OX=9606 GN=EIF3D PE=1 SV=1	20	7	18	7	63.9	EIF3D	2.26304e+06	1.55841e+06	1.91073e+06	7.48445e+06	6.49418e+06	6.98931e+06	5.69229e+06	5.49249e+06	5.59239e+06	5.07859e+06	3.68166e+06
High	Master Protein	P28066	Proteasome subunit alpha type-5 OS=Homo sapiens OX=9606 GN=PSMA5 PE=1 SV=3	21	4	18	4	26.4	PSMA5	4.203e+06	2.20163e+06	3.20231e+06	1.9508e+07	1.38181e+07	1.66631e+07	1.23704e+07	1.74268e+07	1.48986e+07	1.34608e+07	1.16963e+07
High	Master Protein	Q01650	Large neutral amino acids transporter small subunit 1 OS=Homo sapiens OX=9606 GN=SLC7A5 PE=1 SV=2	7	3	18	3	55	SLC7A5	694251	280872	487562	3.6858e+07	2.71108e+07	3.19844e+07	2.14623e+07	2.0961e+07	2.12117e+07	3.14969e+07	2.07241e+07
High	Master Protein	O00232	26S proteasome non-ATPase regulatory subunit 12 OS=Homo sapiens OX=9606 GN=PSMD12 PE=1 SV=3	17	7	18	7	52.9	PSMD12	452561	860319	656440	1.01224e+07	8459185	9.29079e+06	5.64412e+06	7.49696e+06	6.57054e+06	8.63435e+06	5.9141e+06
High	Master Protein	Q6NXE6	Armadillo repeat-containing protein 6 OS=Homo sapiens OX=9606 GN=ARMC6 PE=1 SV=2	26	8	18	8	54.1	ARMC6	184062		184062	2.0722e+07	1.9444e+07	2.0083e+07	1.4168e+07	1.4359e+07	1.42635e+07	1.9899e+07	1.40795e+07
High	Master Protein	P23528	Cofilin-1 OS=Homo sapiens OX=9606 GN=CFL1 PE=1 SV=3	51	5	18	5	18.5	CFL1	5.30602e+06	5.04852e+06	5.17727e+06	2.32131e+07	2.20168e+07	2.26149e+07	2.02488e+07	2.31376e+07	2.16932e+07	1.74377e+07	1.65159e+07
High	Master Protein	O75396	Vesicle-trafficking protein SEC22b OS=Homo sapiens OX=9606 GN=SEC22B PE=1 SV=5	34	8	18	8	24.7	SEC22B	61658.3	153076	107367	1.5532e+07	1.13121e+07	1.3422e+07	9.05345e+06	1.41883e+07	1.16209e+07	1.33147e+07	1.15135e+07
High	Master Protein	Q8NI27	THO complex subunit 2 OS=Homo sapiens OX=9606 GN=THOC2 PE=1 SV=2	5	7	18	7	182.7	THOC2	734519	1.26741e+06	1.00096e+06	1.30166e+07	8.93106e+06	1.09738e+07	5.87058e+06	6.82985e+06	6.35022e+06	9.97285e+06	5.34925e+06
High	Master Protein	P25788	Proteasome subunit alpha type-3 OS=Homo sapiens OX=9606 GN=PSMA3 PE=1 SV=2	27	8	18	8	28.4	PSMA3	1.20856e+06	1.61845e+06	1.4135e+06	2.38264e+07	1.68022e+07	2.03143e+07	1.37767e+07	2.12884e+07	1.75326e+07	1.89008e+07	1.61191e+07
High	Master Protein	Q9H9E3	Conserved oligomeric Golgi complex subunit 4 OS=Homo sapiens OX=9606 GN=COG4 PE=1 SV=3	11	7	18	7	89	COG4	469106	550694	509900	1.00427e+07	9.03149e+06	9.53707e+06	5.79511e+06	5.63036e+06	5.71274e+06	9.02717e+06	5.20284e+06
High	Master Protein	P63173	Large ribosomal subunit protein eL38 OS=Homo sapiens OX=9606 GN=RPL38 PE=1 SV=2	50	4	18	4	8.2	RPL38	2.50156e+06	1.94252e+06	2.22204e+06	36960707	3.49964e+07	3.59786e+07	2.28559e+07	2.87831e+07	2.58195e+07	3.37565e+07	2.35975e+07
High	Master Protein	P22626	Heterogeneous nuclear ribonucleoproteins A2/B1 OS=Homo sapiens OX=9606 GN=HNRNPA2B1 PE=1 SV=2	18	5	18	5	37.4	HNRNPA2B1	5.92979e+06	3.46748e+06	4.69864e+06	1.12769e+07	9.053e+06	1.0165e+07	3.53366e+06	5.82e+06	4.67683e+06	5.46632e+06	-21803.7
High	Master Protein	P62888	Large ribosomal subunit protein eL30 OS=Homo sapiens OX=9606 GN=RPL30 PE=1 SV=2	50	5	18	5	12.8	RPL30	4.48596e+06	2.76394e+06	3.62495e+06	1.24053e+07	1.36479e+07	1.30266e+07	7.98707e+06	7.75308e+06	7.87007e+06	9.40166e+06	4.24512e+06
High	Master Protein	P13804	Electron transfer flavoprotein subunit alpha, mitochondrial OS=Homo sapiens OX=9606 GN=ETFA PE=1 SV=1	35	7	18	7	35.1	ETFA	505756	605229	555492	1.53439e+07	1.12595e+07	1.33017e+07	8.77791e+06	1.21955e+07	1.04867e+07	1.27462e+07	9.9312e+06
High	Master Protein	Q9BQ39	ATP-dependent RNA helicase DDX50 OS=Homo sapiens OX=9606 GN=DDX50 PE=1 SV=1	10	5	18	3	82.5	DDX50	785976	690020	737998	4.12987e+06	2.65407e+06	3.39197e+06	2.67787e+06	3.20581e+06	2.94184e+06	2.65397e+06	2.20385e+06
High	Master Protein	P23526	Adenosylhomocysteinase OS=Homo sapiens OX=9606 GN=AHCY PE=1 SV=4	14	6	18	6	47.7	AHCY	3.22424e+06	2.71718e+06	2.97071e+06	1.03982e+07	8.3812e+06	9.38972e+06	6.15183e+06	7.99591e+06	7.07387e+06	6.419e+06	4.10316e+06
High	Master Protein	Q14671	Pumilio homolog 1 OS=Homo sapiens OX=9606 GN=PUM1 PE=1 SV=3	9	8	18	8	126.4	PUM1	1.12837e+06	116954	622662	1.15895e+07	8.6799e+06	1.01347e+07	7.87125e+06	7.97842e+06	7.92483e+06	9.51204e+06	7.30217e+06
High	Master Protein	P13995	Bifunctional methylenetetrahydrofolate dehydrogenase/cyclohydrolase, mitochondrial OS=Homo sapiens OX=9606 GN=MTHFD2 PE=1 SV=2	15	4	18	4	37.9	MTHFD2	4.38598e+06	1.35873e+06	2.87236e+06	1.46849e+07	1.04649e+07	1.25749e+07	7.34744e+06	1.03523e+07	8.84987e+06	9.70254e+06	5.97751e+06
High	Master Protein	Q96JJ7	Protein disulfide-isomerase TMX3 OS=Homo sapiens OX=9606 GN=TMX3 PE=1 SV=2	25	8	18	8	51.8	TMX3			#DIV/0!	2.75331e+07	23865241	2.56992e+07	1.8611e+07	2.74137e+07	2.30123e+07	#DIV/0!	#DIV/0!
High	Master Protein	Q9UJZ1	Stomatin-like protein 2, mitochondrial OS=Homo sapiens OX=9606 GN=STOML2 PE=1 SV=1	33	7	18	7	38.5	STOML2	2.97301e+06	2.23143e+06	2.60222e+06	2.29843e+07	1.80636e+07	2.0524e+07	1.33683e+07	1.55881e+07	1.44782e+07	1.79218e+07	1.1876e+07
High	Master Protein	O60645	Exocyst complex component 3 OS=Homo sapiens OX=9606 GN=EXOC3 PE=1 SV=3	17	10	17	10	85.5	EXOC3			#DIV/0!	1.74988e+07	1.5675e+07	1.65869e+07	1.99696e+07	2.62392e+07	2.31044e+07	#DIV/0!	#DIV/0!
High	Master Protein	Q92540	Nonsense-mediated mRNA decay factor SMG7 OS=Homo sapiens OX=9606 GN=SMG7 PE=1 SV=2	7	7	17	7	127.2	SMG7			#DIV/0!	1.10232e+07	6.85219e+06	8.9377e+06	8.26909e+06	8.70698e+06	8.48803e+06	#DIV/0!	#DIV/0!
High	Master Protein	Q96AE4	Far upstream element-binding protein 1 OS=Homo sapiens OX=9606 GN=FUBP1 PE=1 SV=3	8	5	17	3	67.5	FUBP1	1.60139e+06	287474	944430	5865591	4.47561e+06	5.1706e+06	1.14681e+06	4.60252e+06	2.87466e+06	4.22617e+06	1.93023e+06
High	Master Protein	Q8IWZ3	Ankyrin repeat and KH domain-containing protein 1 OS=Homo sapiens OX=9606 GN=ANKHD1 PE=1 SV=1	5	9	17	4	269.3	ANKHD1	3.04579e+06	1.85617e+06	2.45098e+06	5.82307e+06	5.59372e+06	5.7084e+06	4.05245e+06	2.36665e+06	3.20955e+06	3.25742e+06	758567
High	Master Protein	P04908	Histone H2A type 1-B/E OS=Homo sapiens OX=9606 GN=H2AC4 PE=1 SV=2	44	3	17	3	14.1	H2AC4; H2AC8	1.0087e+07	6.27525e+06	8.18113e+06	2.21201e+07	1.4242e+07	1.8181e+07	1.40515e+07	1.24507e+07	1.32511e+07	9.99992e+06	5.06995e+06
High	Master Protein	Q9Y224	RNA transcription, translation and transport factor protein OS=Homo sapiens OX=9606 GN=RTRAF PE=1 SV=1	38	6	17	6	28.1	RTRAF	1.18876e+06	2.09761e+06	1.64318e+06	7.11978e+06	3.96584e+06	5.54281e+06	3.43263e+06	5.80271e+06	4.61767e+06	3.89962e+06	2.97449e+06
High	Master Protein	O60313	Dynamin-like 120 kDa protein, mitochondrial OS=Homo sapiens OX=9606 GN=OPA1 PE=1 SV=3	14	10	17	10	111.6	OPA1	727568	624200	675884	1.72264e+07	1.29958e+07	1.51111e+07	8.82492e+06	1.00983e+07	9.46163e+06	1.44352e+07	8.78574e+06
High	Master Protein	Q9Y383	Putative RNA-binding protein Luc7-like 2 OS=Homo sapiens OX=9606 GN=LUC7L2 PE=1 SV=2	17	6	17	6	46.5	LUC7L2	1.26814e+06	617358	942751	1.1374e+07	8.20402e+06	9.78902e+06	6.78443e+06	8.48898e+06	7.63671e+06	8.84627e+06	6.69395e+06
High	Master Protein	P60866	Small ribosomal subunit protein uS10 OS=Homo sapiens OX=9606 GN=RPS20 PE=1 SV=1	32	5	17	5	13.4	RPS20	3.72825e+07	2.17715e+07	2.9527e+07	116231821	90347638	1.0329e+08	6.77486e+07	83799600	7.57741e+07	73762755	4.62471e+07
High	Master Protein	Q9P2I0	Cleavage and polyadenylation specificity factor subunit 2 OS=Homo sapiens OX=9606 GN=CPSF2 PE=1 SV=2	11	8	17	8	88.4	CPSF2	5.01275e+06	4.42386e+06	4.7183e+06	1.32976e+07	9.20979e+06	11253677	9.88734e+06	8.71634e+06	9.30184e+06	6.53537e+06	4.58354e+06
High	Master Protein	P51148	Ras-related protein Rab-5C OS=Homo sapiens OX=9606 GN=RAB5C PE=1 SV=2	29	5	17	4	23.5	RAB5C	2.02464e+06	1.57746e+06	1.80105e+06	2.08887e+07	1.72367e+07	1.90627e+07	1.2844e+07	1.73143e+07	1.50792e+07	1.72616e+07	1.32781e+07
High	Master Protein	O00311	Cell division cycle 7-related protein kinase OS=Homo sapiens OX=9606 GN=CDC7 PE=1 SV=1	11	5	17	5	63.8	CDC7	361110	194063	277586	4.53973e+06	3.36143e+06	3.95058e+06	2.53727e+06	2.586e+06	2.56163e+06	3.67299e+06	2.28405e+06
High	Master Protein	O14828	Secretory carrier-associated membrane protein 3 OS=Homo sapiens OX=9606 GN=SCAMP3 PE=1 SV=3	22	6	17	6	38.3	SCAMP3	742300	470059	606179	2.67288e+07	2.20361e+07	2.43825e+07	1.55806e+07	1.81841e+07	1.68824e+07	2.37763e+07	1.62762e+07
High	Master Protein	Q9BUQ8	Probable ATP-dependent RNA helicase DDX23 OS=Homo sapiens OX=9606 GN=DDX23 PE=1 SV=3	11	8	17	8	95.5	DDX23		446245	446245	8.79396e+06	5.48704e+06	7.1405e+06	5.62305e+06	6.12239e+06	5.87272e+06	6.69426e+06	5.42647e+06
High	Master Protein	Q9BZX2	Uridine-cytidine kinase 2 OS=Homo sapiens OX=9606 GN=UCK2 PE=1 SV=1	38	7	17	7	29.3	UCK2	1.63863e+06	482498	1.06056e+06	18414487	1.34486e+07	1.59315e+07	1.00418e+07	1.30687e+07	1.15552e+07	1.4871e+07	1.04947e+07
High	Master Protein	Q14694	Ubiquitin carboxyl-terminal hydrolase 10 OS=Homo sapiens OX=9606 GN=USP10 PE=1 SV=2	12	7	17	7	87.1	USP10	1.12965e+06	1.54153e+06	1.33559e+06	1.01742e+07	7.55626e+06	8.86525e+06	4.44686e+06	3.82222e+06	4.13454e+06	7.52966e+06	2.79895e+06
High	Master Protein	Q8NE86	Calcium uniporter protein, mitochondrial OS=Homo sapiens OX=9606 GN=MCU PE=1 SV=1	25	6	17	6	39.8	MCU	551039	327804	439421	2.32695e+07	1.74589e+07	2.03642e+07	1.29719e+07	1.95737e+07	1.62728e+07	1.99247e+07	1.58334e+07
High	Master Protein	Q5JTV8	Torsin-1A-interacting protein 1 OS=Homo sapiens OX=9606 GN=TOR1AIP1 PE=1 SV=2	13	6	17	6	66.2	TOR1AIP1	67969.8	399254	233612	1.17537e+07	1.22642e+07	1.20089e+07	1.03143e+07	1.09124e+07	1.06133e+07	1.17753e+07	1.03797e+07
High	Master Protein	O94906	Pre-mRNA-processing factor 6 OS=Homo sapiens OX=9606 GN=PRPF6 PE=1 SV=1	8	7	17	7	106.9	PRPF6		153109	153109	4.13937e+06	6.51866e+06	5.32901e+06	4.19e+06	5.58613e+06	4.88806e+06	5.17591e+06	4.73495e+06
High	Master Protein	Q9UI10	Translation initiation factor eIF-2B subunit delta OS=Homo sapiens OX=9606 GN=EIF2B4 PE=1 SV=2	21	7	17	7	57.5	EIF2B4		177938	177938	1.36394e+07	1.84266e+07	1.6033e+07	1.37939e+07	1.60705e+07	1.49322e+07	1.5855e+07	1.47543e+07
High	Master Protein	P10589	COUP transcription factor 1 OS=Homo sapiens OX=9606 GN=NR2F1 PE=1 SV=1	12	5	17	1	46.1	NR2F1			#DIV/0!	1.07909e+06	923106	1.0011e+06			#DIV/0!	#DIV/0!	#DIV/0!
High	Master Protein	P54619	5'-AMP-activated protein kinase subunit gamma-1 OS=Homo sapiens OX=9606 GN=PRKAG1 PE=1 SV=1	19	5	17	5	37.6	PRKAG1	1.39504e+06	956092	1.17557e+06	7.11967e+06	6.52923e+06	6.82445e+06	5.03969e+06	5.76627e+06	5402978	5.64889e+06	4.22741e+06
High	Master Protein	Q9UIA9	Exportin-7 OS=Homo sapiens OX=9606 GN=XPO7 PE=1 SV=3	8	7	17	7	123.8	XPO7	9897107	9653906	9.77551e+06	1.87501e+07	1.9976e+07	1.9363e+07	1.57598e+07	1.66632e+07	1.62115e+07	9.58752e+06	6.43597e+06
High	Master Protein	P08243	Asparagine synthetase [glutamine-hydrolyzing] OS=Homo sapiens OX=9606 GN=ASNS PE=1 SV=4	13	5	17	5	64.3	ASNS	1.5955e+06	964838	1.28017e+06	5.44339e+06	4.94382e+06	5.1936e+06	3.83304e+06	4.43287e+06	4.13296e+06	3.91344e+06	2.85279e+06
High	Master Protein	Q9Y262	Eukaryotic translation initiation factor 3 subunit L OS=Homo sapiens OX=9606 GN=EIF3L PE=1 SV=1	13	6	17	6	66.7	EIF3L	2.26588e+06	1.45079e+06	1.85833e+06	1.90809e+06	1.41353e+06	1.66081e+06	1198761	1.59573e+06	1.39725e+06	-197522	-461086
High	Master Protein	Q09161	Nuclear cap-binding protein subunit 1 OS=Homo sapiens OX=9606 GN=NCBP1 PE=1 SV=1	10	5	17	5	91.8	NCBP1		210884	210884	4.08694e+06	3513575	3.80026e+06	2.97599e+06	3.92734e+06	3.45166e+06	3.58937e+06	3.24078e+06
High	Master Protein	Q15070	Mitochondrial inner membrane protein OXA1L OS=Homo sapiens OX=9606 GN=OXA1L PE=1 SV=3	14	8	17	8	48.5		290500	462688	376594	3.12192e+07	2.7332e+07	2.92756e+07	19415831	3.28392e+07	2.61275e+07	2.8899e+07	2.57509e+07
High	Master Protein	P62306	Small nuclear ribonucleoprotein F OS=Homo sapiens OX=9606 GN=SNRPF PE=1 SV=1	24	2	17	2	9.7	SNRPF	484788	294657	389722	6.00882e+06	5.62283e+06	5.81583e+06	4.03386e+06	3.77687e+06	3.90537e+06	5.4261e+06	3.51565e+06
High	Master Protein	P49593	Protein phosphatase 1F OS=Homo sapiens OX=9606 GN=PPM1F PE=1 SV=3	27	6	17	6	49.8	PPM1F	341911		341911	1.00694e+07	9.40626e+06	9.73781e+06	9.3025e+06	1.10075e+07	1.0155e+07	9.3959e+06	9.81308e+06
High	Master Protein	P55084	Trifunctional enzyme subunit beta, mitochondrial OS=Homo sapiens OX=9606 GN=HADHB PE=1 SV=3	11	5	17	5	51.3	HADHB	2.87344e+06	1.94873e+06	2.41108e+06	1.67062e+07	1.48167e+07	1.57615e+07	1.07166e+07	1.18555e+07	1.1286e+07	1.33504e+07	8.87494e+06
High	Master Protein	Q9BWH6	RNA polymerase II-associated protein 1 OS=Homo sapiens OX=9606 GN=RPAP1 PE=1 SV=3	8	8	17	8	152.7	RPAP1	1.10056e+06	1.57086e+06	1.33571e+06	7.74228e+06	6.02999e+06	6.88613e+06	4.38052e+06	4.03403e+06	4.20728e+06	5.55042e+06	2.87156e+06
High	Master Protein	P38919	Eukaryotic initiation factor 4A-III OS=Homo sapiens OX=9606 GN=EIF4A3 PE=1 SV=4	21	6	17	5	46.8	EIF4A3	520124	704012	612068	2.96342e+06	2.50081e+06	2.73212e+06	1.49511e+06	2.50583e+06	2.00047e+06	2.12005e+06	1.3884e+06
High	Master Protein	Q9BRX2	Protein pelota homolog OS=Homo sapiens OX=9606 GN=PELO PE=1 SV=2	27	8	17	8	43.3	PELO	2.21568e+06	442440	1.32906e+06	8.70971e+06	5.88892e+06	7.29932e+06	5069146	6.71468e+06	5.89191e+06	5.97026e+06	4.56285e+06
High	Master Protein	P62826	GTP-binding nuclear protein Ran OS=Homo sapiens OX=9606 GN=RAN PE=1 SV=3	25	4	17	4	24.4	RAN	8.15646e+06	6.59918e+06	7.37782e+06	2.54953e+07	1.74183e+07	2.14568e+07	1.39117e+07	1.99493e+07	1.69305e+07	1.4079e+07	9.55265e+06
High	Master Protein	P50416	Carnitine O-palmitoyltransferase 1, liver isoform OS=Homo sapiens OX=9606 GN=CPT1A PE=1 SV=2	10	6	17	6	88.3	CPT1A			#DIV/0!	1.36916e+07	1.07009e+07	1.21962e+07	8.96584e+06	9.44471e+06	9.20528e+06	#DIV/0!	#DIV/0!
High	Master Protein	Q13535	Serine/threonine-protein kinase ATR OS=Homo sapiens OX=9606 GN=ATR PE=1 SV=3	4	7	17	7	301.2	ATR	202647	77015.8	139831	7.31297e+06	7.47578e+06	7.39437e+06	3.82358e+06	4.02786e+06	3.92572e+06	7.25454e+06	3.78589e+06
High	Master Protein	Q9H3P7	Golgi resident protein GCP60 OS=Homo sapiens OX=9606 GN=ACBD3 PE=1 SV=4	20	6	17	6	60.6	ACBD3	643868	746019	694944	4.5889e+06	3.69765e+06	4.14328e+06	3.47648e+06	3.15738e+06	3.31693e+06	3.44833e+06	2.62198e+06
High	Master Protein	P62857	Small ribosomal subunit protein eS28 OS=Homo sapiens OX=9606 GN=RPS28 PE=1 SV=1	51	4	17	4	7.8	RPS28	709471	599665	654568	8.99766e+06	5.217e+06	7.10733e+06	4.36274e+06	7.83909e+06	6.10091e+06	6.45276e+06	5.44635e+06
High	Master Protein	O43505	Beta-1,4-glucuronyltransferase 1 OS=Homo sapiens OX=9606 GN=B4GAT1 PE=1 SV=1	22	6	17	6	47.1	B4GAT1			#DIV/0!	1.89572e+07	1.48258e+07	1.68915e+07	1.27642e+07	1.62504e+07	1.45073e+07	#DIV/0!	#DIV/0!
High	Master Protein	Q9Y6M1	Insulin-like growth factor 2 mRNA-binding protein 2 OS=Homo sapiens OX=9606 GN=IGF2BP2 PE=1 SV=2	7	3	16	1	66.1	IGF2BP2	208074	188432	198253	572126	683834	627980	652311	895764	774038	429727	575785
High	Master Protein	Q96TC7	Regulator of microtubule dynamics protein 3 OS=Homo sapiens OX=9606 GN=RMDN3 PE=1 SV=2	20	6	16	6	52.1	RMDN3			#DIV/0!	1.00688e+07	8.70614e+06	9.38749e+06	1.0173e+07	1.23489e+07	1.12609e+07	#DIV/0!	#DIV/0!
High	Master Protein	Q8NFF5	FAD synthase OS=Homo sapiens OX=9606 GN=FLAD1 PE=1 SV=1	16	5	16	5	65.2	FLAD1	133808	138331	136070	5.91255e+06	4.80441e+06	5.35848e+06	5.08724e+06	4.78623e+06	4.93674e+06	5.22241e+06	4.80067e+06
High	Master Protein	P08559	Pyruvate dehydrogenase E1 component subunit alpha, somatic form, mitochondrial OS=Homo sapiens OX=9606 GN=PDHA1 PE=1 SV=3	14	6	16	6	43.3	PDHA1	1.11636e+06	421328	768843	11694276	6.22268e+06	8.95848e+06	4.99916e+06	7.86549e+06	6.43232e+06	8.18963e+06	5.66348e+06
High	Master Protein	Q92947	Glutaryl-CoA dehydrogenase, mitochondrial OS=Homo sapiens OX=9606 GN=GCDH PE=1 SV=1	20	6	16	6	48.1	GCDH	1.45041e+06	1.44419e+06	1.4473e+06	1.99435e+07	19127814	1.95356e+07	1.12681e+07	2.08918e+07	1.60799e+07	1.80883e+07	1.46326e+07
High	Master Protein	P49915	GMP synthase [glutamine-hydrolyzing] OS=Homo sapiens OX=9606 GN=GMPS PE=1 SV=1	15	7	16	7	76.7	GMPS	1.30683e+06	849240	1.07803e+06	8.30537e+06	5.4092e+06	6.85728e+06	4.50713e+06	5.27388e+06	4.8905e+06	5.77925e+06	3.81247e+06
High	Master Protein	P06493	Cyclin-dependent kinase 1 OS=Homo sapiens OX=9606 GN=CDK1 PE=1 SV=3	27	7	16	5	34.1	CDK1	1.53313e+07	1.05451e+07	1.29382e+07	4.93987e+07	4.4651e+07	4.70248e+07	31674295	4.37381e+07	3.77062e+07	3.40867e+07	2.4768e+07
High	Master Protein	P62917	Large ribosomal subunit protein uL2 OS=Homo sapiens OX=9606 GN=RPL8 PE=1 SV=2	18	5	16	5	28	RPL8	1.08118e+07	1.04018e+07	1.06068e+07	5.03491e+07	40467479	4.54083e+07	28668847	4.40257e+07	3.63473e+07	3.48015e+07	2.57404e+07
High	Master Protein	Q9BTV4	Transmembrane protein 43 OS=Homo sapiens OX=9606 GN=TMEM43 PE=1 SV=1	29	7	16	7	44.8	TMEM43		104222	104222	1.69776e+07	1.25834e+07	1.47805e+07	1.20673e+07	1.43098e+07	1.31885e+07	1.46763e+07	1.30843e+07
High	Master Protein	P35249	Replication factor C subunit 4 OS=Homo sapiens OX=9606 GN=RFC4 PE=1 SV=2	20	6	16	6	39.7	RFC4	1.99043e+06	1.02691e+06	1.50867e+06	1.25547e+07	9.6816e+06	1.11181e+07	7.00215e+06	9.05088e+06	8.02651e+06	9.60945e+06	6517839
High	Master Protein	P16435	NADPH--cytochrome P450 reductase OS=Homo sapiens OX=9606 GN=POR PE=1 SV=2	11	6	16	6	76.6	POR	552106	102841	327473	8.28194e+06	7.36975e+06	7.82585e+06	7.51111e+06	8.33622e+06	7.92367e+06	7.49837e+06	7.59619e+06
High	Master Protein	Q16637	Survival motor neuron protein OS=Homo sapiens OX=9606 GN=SMN1 PE=1 SV=1	33	6	16	6	31.8	SMN1; SMN2	218565	339279	278922	2.34939e+07	2.02685e+07	2.18812e+07	1.56488e+07	1.783e+07	1.67394e+07	2.16023e+07	1.64605e+07
High	Master Protein	Q13547	Histone deacetylase 1 OS=Homo sapiens OX=9606 GN=HDAC1 PE=1 SV=1	14	6	16	5	55.1	HDAC1	1.4854e+06	586470	1.03594e+06	1.21356e+07	9.92932e+06	1.10325e+07	7.11827e+06	8.34066e+06	7.72947e+06	9.99652e+06	6.69353e+06
High	Master Protein	O15360	Fanconi anemia group A protein OS=Homo sapiens OX=9606 GN=FANCA PE=1 SV=2	6	7	16	7	162.7	FANCA	84864.9		84864.9	9.63548e+06	8.52479e+06	9.08013e+06	4.53366e+06	4.49226e+06	4.51296e+06	8.99527e+06	4.42809e+06
High	Master Protein	P42345	Serine/threonine-protein kinase mTOR OS=Homo sapiens OX=9606 GN=MTOR PE=1 SV=1	3	7	16	7	288.7	MTOR	1.65935e+06	1.33275e+06	1.49605e+06	1.90415e+07	1.20092e+07	1.55254e+07	1.20817e+07	1.14091e+07	1.17454e+07	1.40293e+07	1.02493e+07
High	Master Protein	Q9ULV4	Coronin-1C OS=Homo sapiens OX=9606 GN=CORO1C PE=1 SV=1	14	4	16	4	53.2	CORO1C	1.41432e+06	1.4484e+06	1.43136e+06	5.5884e+06	3.60768e+06	4.59804e+06	2.90698e+06	3.20509e+06	3.05603e+06	3.16668e+06	1.62467e+06
High	Master Protein	Q6DN90	IQ motif and SEC7 domain-containing protein 1 OS=Homo sapiens OX=9606 GN=IQSEC1 PE=1 SV=1	12	9	16	9	108.2	IQSEC1	386458	261630	324044	3.66337e+06	4.41306e+06	4.03822e+06	3.68608e+06	2.03488e+06	2.86048e+06	3.71417e+06	2.53643e+06
High	Master Protein	Q7KZN9	Cytochrome c oxidase assembly protein COX15 homolog OS=Homo sapiens OX=9606 GN=COX15 PE=1 SV=1	20	6	16	6	46	COX15	2.33729e+06	984960	1.66113e+06	3.1484e+07	2.12587e+07	2.63714e+07	1.67925e+07	2.0424e+07	1.86082e+07	2.47103e+07	1.69471e+07
High	Master Protein	O60830	Mitochondrial import inner membrane translocase subunit Tim17-B OS=Homo sapiens OX=9606 GN=TIMM17B PE=1 SV=1	35	6	16	6	18.3	TIMM17B	442750	184632	313691	3.85618e+07	2.82603e+07	3.34111e+07	2.21188e+07	2.48682e+07	2.34935e+07	3.30974e+07	2.31798e+07
High	Master Protein	O60725	Protein-S-isoprenylcysteine O-methyltransferase OS=Homo sapiens OX=9606 GN=ICMT PE=1 SV=1	28	6	16	6	31.9	ICMT	864348	518445	691396	6.84753e+07	4.47702e+07	5.66227e+07	3.90625e+07	44497984	4.17802e+07	5.59313e+07	4.10888e+07
High	Master Protein	Q7Z3C6	Autophagy-related protein 9A OS=Homo sapiens OX=9606 GN=ATG9A PE=1 SV=3	6	4	16	4	94.4	ATG9A			#DIV/0!	6.80898e+06	5038845	5.92391e+06	3.98783e+06	4.34434e+06	4.16608e+06	#DIV/0!	#DIV/0!
High	Master Protein	Q92896	Golgi apparatus protein 1 OS=Homo sapiens OX=9606 GN=GLG1 PE=1 SV=2	6	6	16	6	134.5	GLG1	262055		262055	3.09128e+06	3.46641e+06	3.27884e+06	3.39053e+06	3.32663e+06	3.35858e+06	3.01679e+06	3.09653e+06
High	Master Protein	O00425	Insulin-like growth factor 2 mRNA-binding protein 3 OS=Homo sapiens OX=9606 GN=IGF2BP3 PE=1 SV=2	8	4	16	2	63.7	IGF2BP3	1.65295e+06	1.25824e+06	1.4556e+06	5.50725e+06	5.05585e+06	5.28155e+06	3.75599e+06	5.09076e+06	4.42337e+06	3.82595e+06	2.96778e+06
High	Master Protein	P62913	Large ribosomal subunit protein uL5 OS=Homo sapiens OX=9606 GN=RPL11 PE=1 SV=2	19	4	16	4	20.2	RPL11	1.27735e+07	1.3219e+07	1.29962e+07	62328543	4.88135e+07	5.5571e+07	4.21499e+07	4.56279e+07	4.38889e+07	4.25748e+07	3.08926e+07
High	Master Protein	Q96KA5	Lipid scramblase CLPTM1L OS=Homo sapiens OX=9606 GN=CLPTM1L PE=1 SV=1	16	6	16	6	62.2	CLPTM1L	856695	855082	855889	1.26097e+07	1.00365e+07	1.13231e+07	8.50629e+06	7.825e+06	8.16564e+06	1.04672e+07	7.30975e+06
High	Master Protein	Q13155	Aminoacyl tRNA synthase complex-interacting multifunctional protein 2 OS=Homo sapiens OX=9606 GN=AIMP2 PE=1 SV=2	23	6	16	6	35.3	AIMP2	6.88169e+06	4.3101e+06	5.5959e+06	1.27248e+07	1.18466e+07	1.22857e+07	1.0032e+07	1.1102e+07	1.0567e+07	6.6898e+06	4.97107e+06
High	Master Protein	Q9BTY2	Plasma alpha-L-fucosidase OS=Homo sapiens OX=9606 GN=FUCA2 PE=1 SV=2	14	5	16	5	54	FUCA2			#DIV/0!	6.16806e+06	5.01035e+06	5.58921e+06	4.81144e+06	4.30827e+06	4.55986e+06	#DIV/0!	#DIV/0!
High	Master Protein	Q9H2V7	Protein spinster homolog 1 OS=Homo sapiens OX=9606 GN=SPNS1 PE=1 SV=1	11	3	16	3	56.6	SPNS1	795968	654023	724995	4.57274e+07	3.39204e+07	3.98239e+07	2.47618e+07	2.73335e+07	2.60477e+07	3.90989e+07	2.53227e+07
High	Master Protein	Q9NV70	Exocyst complex component 1 OS=Homo sapiens OX=9606 GN=EXOC1 PE=1 SV=4	10	7	16	7	101.9	EXOC1	419854	403175	411515	1.03496e+07	6.5689e+06	8.45925e+06	6.79736e+06	5.94238e+06	6.36987e+06	8.04773e+06	5.95835e+06
High	Master Protein	Q9BTW9	Tubulin-specific chaperone D OS=Homo sapiens OX=9606 GN=TBCD PE=1 SV=2	6	6	16	6	132.5	TBCD		177180	177180	6.89862e+06	4.28213e+06	5.59038e+06	3.96688e+06	4.88374e+06	4.42531e+06	5.4132e+06	4.24813e+06
High	Master Protein	Q9P0J0	NADH dehydrogenase [ubiquinone] 1 alpha subcomplex subunit 13 OS=Homo sapiens OX=9606 GN=NDUFA13 PE=1 SV=3	32	4	16	4	16.7	NDUFA13	1.79659e+06	1787748	1.79217e+06	97480600	60131797	7.88062e+07	5.12117e+07	44710638	4.79611e+07	7.7014e+07	4.6169e+07
High	Master Protein	P14866	Heterogeneous nuclear ribonucleoprotein L OS=Homo sapiens OX=9606 GN=HNRNPL PE=1 SV=2	19	8	16	8	64.1	HNRNPL	2.51734e+06	1.14617e+06	1.83176e+06	9.1435e+06	1.15566e+07	1.03501e+07	5.91321e+06	6.63334e+06	6.27327e+06	8.51829e+06	4.44152e+06
High	Master Protein	Q9UG63	ATP-binding cassette sub-family F member 2 OS=Homo sapiens OX=9606 GN=ABCF2 PE=1 SV=2	10	6	16	6	71.2	ABCF2	1.86079e+06	539949	1.20037e+06	1.57094e+07	1.36976e+07	1.47035e+07	1.18186e+07	1.87255e+07	1.52721e+07	1.35032e+07	1.40717e+07
High	Master Protein	P46459	Vesicle-fusing ATPase OS=Homo sapiens OX=9606 GN=NSF PE=1 SV=3	13	6	16	6	82.5	NSF	1.61237e+06	1.77578e+06	1.69408e+06	1.04715e+07	9158953	9.81523e+06	7.97659e+06	9.22662e+06	8.6016e+06	8.12116e+06	6.90753e+06
High	Master Protein	O76031	ATP-dependent Clp protease ATP-binding subunit clpX-like, mitochondrial OS=Homo sapiens OX=9606 GN=CLPX PE=1 SV=2	9	6	16	6	69.2	CLPX	461947	618358	540152	7.84683e+06	5.96869e+06	6.90776e+06	4.41933e+06	5.08182e+06	4.75057e+06	6.36761e+06	4.21042e+06
High	Master Protein	O96019	Actin-like protein 6A OS=Homo sapiens OX=9606 GN=ACTL6A PE=1 SV=1	20	6	16	6	47.4	ACTL6A	3.52763e+06	2.53485e+06	3.03124e+06	8.64855e+06	7.12552e+06	7.88703e+06	4.83118e+06	6.14087e+06	5.48602e+06	4.85579e+06	2.45478e+06
High	Master Protein	Q9Y6K0	Choline/ethanolaminephosphotransferase 1 OS=Homo sapiens OX=9606 GN=CEPT1 PE=1 SV=1	21	5	16	5	46.5	CEPT1		530185	530185	4.57802e+07	35801817	4.0791e+07	2.46861e+07	40968238	3.28272e+07	4.02608e+07	3.2297e+07
High	Master Protein	P62854	Small ribosomal subunit protein eS26 OS=Homo sapiens OX=9606 GN=RPS26 PE=1 SV=3	31	3	16	3	13	RPS26	7.01052e+06	6.24081e+06	6.62566e+06	3.83448e+07	3.36499e+07	3.59973e+07	2.8335e+07	3.43814e+07	3.13582e+07	2.93717e+07	2.47325e+07
High	Master Protein	Q9Y3D0	Cytosolic iron-sulfur assembly component 2B OS=Homo sapiens OX=9606 GN=CIAO2B PE=1 SV=1	44	4	16	4	17.7	CIAO2B	2.5315e+06	1.13356e+06	1.83253e+06	4.13461e+07	2.62433e+07	3.37947e+07	2.56601e+07	2.73456e+07	2.65029e+07	3.19622e+07	2.46703e+07
High	Master Protein	Q9H061	Transmembrane protein 126A OS=Homo sapiens OX=9606 GN=TMEM126A PE=1 SV=1	45	6	16	6	21.5	TMEM126A	125195		125195	1.51096e+07	9.92378e+06	1.25167e+07	8.75254e+06	1.04891e+07	9.62083e+06	1.23915e+07	9.49563e+06
High	Master Protein	Q7Z4Q2	HEAT repeat-containing protein 3 OS=Homo sapiens OX=9606 GN=HEATR3 PE=1 SV=2	10	6	16	6	74.5	HEATR3	1.1141e+06	1.60468e+06	1.35939e+06	2.01595e+07	1.37439e+07	1.69517e+07	1.34772e+07	1.39083e+07	1.36927e+07	1.55923e+07	1.23334e+07
High	Master Protein	O43933	Peroxisomal ATPase PEX1 OS=Homo sapiens OX=9606 GN=PEX1 PE=1 SV=1	8	8	16	8	142.8	PEX1			#DIV/0!	8.38787e+06	6.05492e+06	7.2214e+06	4.43158e+06	4.50368e+06	4.46763e+06	#DIV/0!	#DIV/0!
High	Master Protein	Q9BXP5	Serrate RNA effector molecule homolog OS=Homo sapiens OX=9606 GN=SRRT PE=1 SV=1	9	7	16	7	100.6	SRRT	1.04059e+06	923246	981916	7.42512e+06	4.94486e+06	6.18499e+06	4.15267e+06	4.83291e+06	4.49279e+06	5.20308e+06	3.51088e+06
High	Master Protein	P27635	Large ribosomal subunit protein uL16 OS=Homo sapiens OX=9606 GN=RPL10 PE=1 SV=5	29	6	16	6	24.6	RPL10	4.36915e+06	2.52914e+06	3.44915e+06	1.3906e+07	1.45932e+07	1.42496e+07	1.21274e+07	1.644e+07	14283732	1.08004e+07	1.08346e+07
High	Master Protein	Q6P9B9	Integrator complex subunit 5 OS=Homo sapiens OX=9606 GN=INTS5 PE=1 SV=1	7	5	16	5	107.9	INTS5	214309	126872	170590	7185443	5.5146e+06	6.35002e+06	5106018	4.83196e+06	4.96899e+06	6.17943e+06	4.7984e+06
High	Master Protein	Q9UNE7	E3 ubiquitin-protein ligase CHIP OS=Homo sapiens OX=9606 GN=STUB1 PE=1 SV=2	28	8	16	8	34.8	STUB1	3.07042e+06	1.05692e+06	2.06367e+06	2.31823e+07	1.31163e+07	1.81493e+07	1.23558e+07	15866732	1.41113e+07	1.60857e+07	1.20476e+07
High	Master Protein	P06753	Tropomyosin alpha-3 chain OS=Homo sapiens OX=9606 GN=TPM3 PE=1 SV=2	21	6	16	2	32.9	TPM3	9.63343e+06	4.45789e+06	7.04566e+06	1.31167e+07	7.82059e+06	10468621	2.9334e+06	4.27182e+06	3.60261e+06	3.42296e+06	-3.44305e+06
High	Master Protein	P46776	Large ribosomal subunit protein uL15 OS=Homo sapiens OX=9606 GN=RPL27A PE=1 SV=2	22	4	16	4	16.6	RPL27A	4.46439e+06	4.87089e+06	4.66764e+06	2.68563e+07	2.51205e+07	2.59884e+07	19367867	2.22267e+07	2.07973e+07	2.13208e+07	1.61297e+07
High	Master Protein	Q9NXF1	Testis-expressed protein 10 OS=Homo sapiens OX=9606 GN=TEX10 PE=1 SV=2	8	6	16	6	105.6	TEX10	238279	263228	250753	1.48609e+07	1.46474e+07	1.47542e+07	1.26404e+07	1.01943e+07	1.14174e+07	1.45034e+07	1.11666e+07
High	Master Protein	Q71RC2	La-related protein 4 OS=Homo sapiens OX=9606 GN=LARP4 PE=1 SV=3	6	4	15	4	80.5	LARP4	2.19447e+06	1.87614e+06	2.03531e+06	8.39052e+06	6.58662e+06	7.48857e+06	5.96287e+06	5985358	5.97412e+06	5.45326e+06	3.93881e+06
High	Master Protein	P48556	26S proteasome non-ATPase regulatory subunit 8 OS=Homo sapiens OX=9606 GN=PSMD8 PE=1 SV=2	14	5	15	5	39.6	PSMD8	2.7643e+06	1.98787e+06	2.37608e+06	2.53563e+07	1.90462e+07	2.22013e+07	1.42945e+07	2.09464e+07	1.76205e+07	1.98252e+07	1.52444e+07
High	Master Protein	Q86UL3	Glycerol-3-phosphate acyltransferase 4 OS=Homo sapiens OX=9606 GN=GPAT4 PE=1 SV=1	12	4	15	4	52	GPAT4			#DIV/0!	1.41363e+07	9.87103e+06	1.20037e+07	8.45983e+06	8.14508e+06	8.30246e+06	#DIV/0!	#DIV/0!
High	Master Protein	P28074	Proteasome subunit beta type-5 OS=Homo sapiens OX=9606 GN=PSMB5 PE=1 SV=3	19	4	15	4	28.5	PSMB5	280871	347691	314281	8.49381e+06	6.24961e+06	7.37171e+06	5.1701e+06	7.799e+06	6.48455e+06	7.05743e+06	6.17027e+06
High	Master Protein	Q9H0U3	Magnesium transporter protein 1 OS=Homo sapiens OX=9606 GN=MAGT1 PE=1 SV=1	24	8	15	8	38	MAGT1	2.74511e+06	2.16755e+06	2.45633e+06	6.80694e+07	5.23245e+07	6.01969e+07	3.9575e+07	5.42317e+07	4.69033e+07	5.77406e+07	4.4447e+07
High	Master Protein	Q15043	Metal cation symporter ZIP14 OS=Homo sapiens OX=9606 GN=SLC39A14 PE=1 SV=3	11	4	15	4	54.2	SLC39A14	258438		258438	64248538	58677482	61463010	49853897	4.81828e+07	4.90184e+07	6.12046e+07	4.87599e+07
High	Master Protein	Q96SB3	Neurabin-2 OS=Homo sapiens OX=9606 GN=PPP1R9B PE=1 SV=3	8	5	15	5	89.3	PPP1R9B	994890	1.20074e+06	1.09781e+06	4.5291e+06	3.78393e+06	4.15651e+06	1.31585e+06	531883	923867	3.0587e+06	-173947
High	Master Protein	P52429	Diacylglycerol kinase epsilon OS=Homo sapiens OX=9606 GN=DGKE PE=1 SV=1	11	5	15	5	63.9	DGKE	305483	433236	369360	1.56514e+07	1.70451e+07	1.63483e+07	1.36647e+07	1.51798e+07	1.44223e+07	1.59789e+07	1.40529e+07
High	Master Protein	Q13283	Ras GTPase-activating protein-binding protein 1 OS=Homo sapiens OX=9606 GN=G3BP1 PE=1 SV=1	15	5	15	5	52.1	G3BP1	7.83239e+06	6.10162e+06	6.96701e+06	2.88431e+07	3.13542e+07	3.00986e+07	3.54485e+07	3.73628e+07	3.64057e+07	2.31316e+07	2.94386e+07
High	Master Protein	Q99523	Sortilin OS=Homo sapiens OX=9606 GN=SORT1 PE=1 SV=3	5	4	15	4	92	SORT1			#DIV/0!	4.91401e+06	4.10235e+06	4.50818e+06	3.49664e+06	4.33124e+06	3.91394e+06	#DIV/0!	#DIV/0!
High	Master Protein	O94874	E3 UFM1-protein ligase 1 OS=Homo sapiens OX=9606 GN=UFL1 PE=1 SV=2	8	5	15	5	89.5	UFL1	367692	475486	421589	1.09749e+07	9.25014e+06	1.01125e+07	6.68653e+06	8.76013e+06	7.72333e+06	9.69095e+06	7.30174e+06
High	Master Protein	P25787	Proteasome subunit alpha type-2 OS=Homo sapiens OX=9606 GN=PSMA2 PE=1 SV=2	32	5	15	5	25.9	PSMA2	330101	463802	396952	1.23716e+07	7.84994e+06	10110780	7.26028e+06	9.56156e+06	8.41092e+06	9.71383e+06	8.01397e+06
High	Master Protein	O75179	Ankyrin repeat domain-containing protein 17 OS=Homo sapiens OX=9606 GN=ANKRD17 PE=1 SV=3	3	7	15	2	274.1	ANKRD17	1.0924e+06	1.26219e+06	1.17729e+06	3.39105e+06	2.15649e+06	2.77377e+06		1.13776e+06	1.13776e+06	1.59647e+06	-39531.1
High	Master Protein	P61962	DDB1- and CUL4-associated factor 7 OS=Homo sapiens OX=9606 GN=DCAF7 PE=1 SV=1	23	6	15	6	38.9	DCAF7	5.43738e+06	2.68964e+06	4.06351e+06	1.94194e+07	1.6697e+07	1.80582e+07	1.56584e+07	1.76615e+07	1.66599e+07	1.39947e+07	1.25964e+07
High	Master Protein	Q9NRN7	L-aminoadipate-semialdehyde dehydrogenase-phosphopantetheinyl transferase OS=Homo sapiens OX=9606 GN=AASDHPPT PE=1 SV=2	16	4	15	4	35.8	AASDHPPT	1.22674e+06	338117	782429	13468002	9.92156e+06	1.16948e+07	9.91049e+06	1.16021e+07	1.07563e+07	1.09123e+07	9.97387e+06
High	Master Protein	Q99829	Copine-1 OS=Homo sapiens OX=9606 GN=CPNE1 PE=1 SV=1	10	4	15	4	59	CPNE1	828401	916133	872267	5.23634e+06	1.6494e+06	3.44287e+06	4.07669e+06	4.16075e+06	4.11872e+06	2.5706e+06	3.24645e+06
High	Master Protein	B5ME19	Eukaryotic translation initiation factor 3 subunit C-like protein OS=Homo sapiens OX=9606 GN=EIF3CL PE=1 SV=1	8	8	15	8	105.4	EIF3CL	8.62316e+06	6.71108e+06	7.66712e+06	8.82205e+06	6.22146e+06	7.52175e+06	5.06191e+06	5.65281e+06	5.35736e+06	-145371	-2.30976e+06
High	Master Protein	O14579	Coatomer subunit epsilon OS=Homo sapiens OX=9606 GN=COPE PE=1 SV=3	26	5	15	5	34.5	COPE	1.98849e+06	1.71419e+06	1.85134e+06	2.0415e+07	1.32301e+07	1.68226e+07	1.28825e+07	1.83382e+07	1.56103e+07	1.49712e+07	1.3759e+07
High	Master Protein	Q6P1J9	Parafibromin OS=Homo sapiens OX=9606 GN=CDC73 PE=1 SV=1	13	6	15	6	60.5	CDC73	4.52108e+06	1.93209e+06	3.22659e+06	1.19533e+07	7.65756e+06	9.80541e+06	7.50008e+06	9.70298e+06	8.60153e+06	6.57882e+06	5.37495e+06
High	Master Protein	P40926	Malate dehydrogenase, mitochondrial OS=Homo sapiens OX=9606 GN=MDH2 PE=1 SV=3	18	5	15	5	35.5	MDH2	5.01437e+06	2.95534e+06	3.98485e+06	5.77367e+06	4.41573e+06	5.0947e+06	1.99051e+06	3.84291e+06	2.91671e+06	1.10985e+06	-1.06814e+06
High	Master Protein	Q9HCU4	Cadherin EGF LAG seven-pass G-type receptor 2 OS=Homo sapiens OX=9606 GN=CELSR2 PE=1 SV=1	4	9	15	9	317.3	CELSR2	89223.1	54117.7	71670.4	5.1375e+06	4.8961e+06	5.0168e+06	3.84231e+06	3.49385e+06	3.66808e+06	4.94513e+06	3.59641e+06
High	Master Protein	O76021	Ribosomal L1 domain-containing protein 1 OS=Homo sapiens OX=9606 GN=RSL1D1 PE=1 SV=3	10	4	15	4	54.9	RSL1D1	982322	816410	899366	7.22897e+06	7.7826e+06	7.50578e+06	4.05778e+06	6.31562e+06	5.1867e+06	6.60642e+06	4.28734e+06
High	Master Protein	P51659	Peroxisomal multifunctional enzyme type 2 OS=Homo sapiens OX=9606 GN=HSD17B4 PE=1 SV=3	9	5	15	5	79.6	HSD17B4	2.51012e+06	1.85594e+06	2.18303e+06	3.02026e+06	2.20983e+06	2.61505e+06	2.47267e+06	1.9548e+06	2.21374e+06	432017	30705.4
High	Master Protein	P56589	Peroxisomal biogenesis factor 3 OS=Homo sapiens OX=9606 GN=PEX3 PE=1 SV=1	16	4	15	4	42.1	PEX3			#DIV/0!	4.39371e+06	4.84773e+06	4.62072e+06	4.46497e+06	4.58577e+06	4.52537e+06	#DIV/0!	#DIV/0!
High	Master Protein	Q14202	Zinc finger MYM-type protein 3 OS=Homo sapiens OX=9606 GN=ZMYM3 PE=1 SV=2	6	8	15	7	152.3	ZMYM3			#DIV/0!	5.54897e+06	2.39058e+06	3.96978e+06	2.60771e+06	2.39883e+06	2.50327e+06	#DIV/0!	#DIV/0!
High	Master Protein	O00471	Exocyst complex component 5 OS=Homo sapiens OX=9606 GN=EXOC5 PE=1 SV=1	10	6	15	6	81.8	EXOC5	352965	120946	236955	8.52475e+06	8.71565e+06	8.6202e+06	6.24592e+06	5.65626e+06	5.95109e+06	8.38324e+06	5.71414e+06
High	Master Protein	P60468	Protein transport protein Sec61 subunit beta OS=Homo sapiens OX=9606 GN=SEC61B PE=1 SV=2	22	2	15	2	10	SEC61B	3.24713e+06	1.90353e+06	2.57533e+06	49845177	3.83633e+07	4.41043e+07	3.35338e+07	3.59167e+07	3.47252e+07	4.15289e+07	3.21499e+07
High	Master Protein	Q14746	Conserved oligomeric Golgi complex subunit 2 OS=Homo sapiens OX=9606 GN=COG2 PE=1 SV=1	11	6	15	6	83.2	COG2			#DIV/0!	4.1959e+06	3.72205e+06	3.95898e+06	3.13004e+06	3.86822e+06	3.49913e+06	#DIV/0!	#DIV/0!
High	Master Protein	Q9NVH0	Exonuclease 3'-5' domain-containing protein 2 OS=Homo sapiens OX=9606 GN=EXD2 PE=1 SV=2	8	4	15	4	70.3	EXD2	368009	536865	452437	1.09683e+07	9.85827e+06	1.04133e+07	5.88433e+06	7.22105e+06	6.55269e+06	9.96084e+06	6.10025e+06
High	Master Protein	O95674	Phosphatidate cytidylyltransferase 2 OS=Homo sapiens OX=9606 GN=CDS2 PE=1 SV=1	22	6	15	6	51.4	CDS2		212650	212650	27523220	1.70754e+07	2.22993e+07	1.31102e+07	1.39165e+07	1.35134e+07	2.20867e+07	1.33007e+07
High	Master Protein	Q9UBT7	Alpha-catulin OS=Homo sapiens OX=9606 GN=CTNNAL1 PE=1 SV=2	13	7	15	7	81.8	CTNNAL1	121488	328923	225206	6.51329e+06	5.9823e+06	6.24779e+06	7.10373e+06	7.4213e+06	7.26251e+06	6.02258e+06	7.03731e+06
High	Master Protein	P26639	Threonine--tRNA ligase 1, cytoplasmic OS=Homo sapiens OX=9606 GN=TARS1 PE=1 SV=3	10	7	15	7	83.4	TARS1	2.91339e+06	2.75806e+06	2.83573e+06	1.04345e+07	6.81036e+06	8.62242e+06	5.68173e+06	7.41641e+06	6.54907e+06	5.78669e+06	3.71334e+06
High	Master Protein	P62266	Small ribosomal subunit protein uS12 OS=Homo sapiens OX=9606 GN=RPS23 PE=1 SV=3	48	5	15	5	15.8	RPS23	4.21123e+06	3.68467e+06	3.94795e+06	3.34113e+07	2.79489e+07	3.06801e+07	2.28565e+07	2.89792e+07	2.59179e+07	2.67322e+07	2.19699e+07
High	Master Protein	Q9Y289	Sodium-dependent multivitamin transporter OS=Homo sapiens OX=9606 GN=SLC5A6 PE=1 SV=2	9	5	15	5	68.6	SLC5A6	32220.1	41727	36973.6	2.87265e+07	2.22212e+07	2.54738e+07	1.98519e+07	1.66886e+07	1.82703e+07	2.54368e+07	1.82333e+07
High	Master Protein	Q86UT6	NLR family member X1 OS=Homo sapiens OX=9606 GN=NLRX1 PE=1 SV=1	8	7	15	7	107.5	NLRX1	90340.5	578321	334330	2.06539e+07	1.44002e+07	1.7527e+07	1.16424e+07	1.24087e+07	1.20256e+07	1.71927e+07	1.16912e+07
High	Master Protein	P40938	Replication factor C subunit 3 OS=Homo sapiens OX=9606 GN=RFC3 PE=1 SV=2	15	4	15	4	40.5	RFC3	816170	526560	671365	5.4123e+06	3.09925e+06	4.25577e+06	2.13779e+06	3.42011e+06	2.77895e+06	3.58441e+06	2.10759e+06
High	Master Protein	P98175	RNA-binding protein 10 OS=Homo sapiens OX=9606 GN=RBM10 PE=1 SV=3	14	7	15	7	103.5	RBM10			#DIV/0!	10545107	8.92904e+06	9.73707e+06	8.01122e+06	9.40336e+06	8.70729e+06	#DIV/0!	#DIV/0!
High	Master Protein	Q15637	Splicing factor 1 OS=Homo sapiens OX=9606 GN=SF1 PE=1 SV=4	16	7	15	7	68.3	SF1	256440	170950	213695	3890277	4.31868e+06	4.10448e+06	3.16617e+06	3.55822e+06	3.36219e+06	3.89078e+06	3.1485e+06
High	Master Protein	Q9BV38	WD repeat-containing protein 18 OS=Homo sapiens OX=9606 GN=WDR18 PE=1 SV=2	19	6	15	6	47.4	WDR18	1.40687e+06	1.02428e+06	1.21557e+06	1.12508e+07	9.31029e+06	1.02806e+07	6.27556e+06	8.56958e+06	7.42257e+06	9.06499e+06	6.207e+06
High	Master Protein	P12277	Creatine kinase B-type OS=Homo sapiens OX=9606 GN=CKB PE=1 SV=1	15	4	15	4	42.6	CKB	6.00152e+06	3.65504e+06	4.82828e+06	1.15166e+07	1.24956e+07	1.20061e+07	6.37476e+06	6.98085e+06	6.67781e+06	7.17787e+06	1.84953e+06
High	Master Protein	P14678	Small nuclear ribonucleoprotein-associated proteins B and B' OS=Homo sapiens OX=9606 GN=SNRPB PE=1 SV=2	19	5	15	5	24.6	SNRPB	3.51994e+06	3.98835e+06	3.75414e+06	2.70466e+07	2.23097e+07	2.46781e+07	1.83242e+07	26960547	2.26424e+07	2.0924e+07	1.88882e+07
High	Master Protein	P55735	Protein SEC13 homolog OS=Homo sapiens OX=9606 GN=SEC13 PE=1 SV=3	22	5	15	5	35.5	SEC13	1.75572e+06	687765	1.22174e+06	20279363	18594920	1.94371e+07	1.67701e+07	2.04749e+07	1.86225e+07	1.82154e+07	1.74008e+07
High	Master Protein	Q9Y2I1	Nischarin OS=Homo sapiens OX=9606 GN=NISCH PE=1 SV=3	4	5	15	5	166.5	NISCH	325462	689160	507311	1.11763e+07	1.01351e+07	1.06557e+07	7.76021e+06	6.49057e+06	7.12539e+06	1.01484e+07	6.61808e+06
High	Master Protein	P23246	Splicing factor, proline- and glutamine-rich OS=Homo sapiens OX=9606 GN=SFPQ PE=1 SV=2	10	6	15	5	76.1	SFPQ	4.38298e+06	3898660	4.14082e+06	5.9399e+06	4.43675e+06	5.18833e+06	3.78729e+06	3.87197e+06	3.82963e+06	1.04751e+06	-311190
High	Master Protein	Q12770	Sterol regulatory element-binding protein cleavage-activating protein OS=Homo sapiens OX=9606 GN=SCAP PE=1 SV=4	5	7	15	7	139.6	SCAP			#DIV/0!	6.31456e+06	4.25415e+06	5.28436e+06	3.68578e+06	4.40942e+06	4.0476e+06	#DIV/0!	#DIV/0!
High	Master Protein	P62937	Peptidyl-prolyl cis-trans isomerase A OS=Homo sapiens OX=9606 GN=PPIA PE=1 SV=2	34	5	15	5	18	PPIA	1.54934e+07	8.45874e+06	1.19761e+07	1.98966e+07	1.04768e+07	15186669	1.29457e+07	1.03777e+07	1.16617e+07	3.21059e+06	-314368
High	Master Protein	Q8WWM7	Ataxin-2-like protein OS=Homo sapiens OX=9606 GN=ATXN2L PE=1 SV=2	6	5	15	5	113.3	ATXN2L	2.07943e+06	1.64684e+06	1.86314e+06	3.55754e+06	3.68122e+06	3.61938e+06	2.24878e+06	2.49196e+06	2.37037e+06	1.75624e+06	507232
High	Master Protein	O00487	26S proteasome non-ATPase regulatory subunit 14 OS=Homo sapiens OX=9606 GN=PSMD14 PE=1 SV=1	19	4	15	4	34.6	PSMD14	479346	2.65718e+06	1.56826e+06	1.69935e+07	1.2793e+07	1.48933e+07	1.08329e+07	1.60053e+07	1.34191e+07	1.3325e+07	1.18508e+07
High	Master Protein	Q15773	Myeloid leukemia factor 2 OS=Homo sapiens OX=9606 GN=MLF2 PE=1 SV=1	16	3	15	3	28.1	MLF2	1.83703e+06	554915	1.19597e+06	1.71708e+07	1.2606e+07	1.48884e+07	1.02475e+07	1.41658e+07	1.22066e+07	1.36924e+07	1.10107e+07
High	Master Protein	Q9UPR3	Nonsense-mediated mRNA decay factor SMG5 OS=Homo sapiens OX=9606 GN=SMG5 PE=1 SV=3	6	5	15	5	113.9	SMG5	223232	236518	229875	1.03658e+07	8.46057e+06	9.41318e+06	8.84227e+06	8.14355e+06	8.49291e+06	9.1833e+06	8.26304e+06
High	Master Protein	P62750	Large ribosomal subunit protein uL23 OS=Homo sapiens OX=9606 GN=RPL23A PE=1 SV=1	22	5	15	5	17.7	RPL23A	5.48233e+06	3.79618e+06	4.63925e+06	2.64249e+07	1.65274e+07	2.14762e+07	1.62473e+07	1.71786e+07	1.67129e+07	1.68369e+07	1.20737e+07
High	Master Protein	Q96ER3	Protein SAAL1 OS=Homo sapiens OX=9606 GN=SAAL1 PE=1 SV=2	17	7	15	7	53.5	SAAL1	434227	426508	430368	1.43392e+07	1.54833e+07	1.49113e+07	1.36606e+07	1.34201e+07	1.35404e+07	1.44809e+07	1.311e+07
High	Master Protein	O15173	Membrane-associated progesterone receptor component 2 OS=Homo sapiens OX=9606 GN=PGRMC2 PE=1 SV=1	26	6	15	5	23.8	PGRMC2		128627	128627	1.49392e+07	6.53228e+06	10735751	5.09332e+06	1.64181e+07	1.07557e+07	1.06071e+07	1.06271e+07
High	Master Protein	O14818	Proteasome subunit alpha type-7 OS=Homo sapiens OX=9606 GN=PSMA7 PE=1 SV=1	33	5	15	5	27.9	PSMA7	3.69437e+06	2.12357e+06	2.90897e+06	1.04778e+07	1.11313e+07	1.08046e+07	1.05594e+07	1.35487e+07	1.2054e+07	7.89561e+06	9.14507e+06
High	Master Protein	O94927	HAUS augmin-like complex subunit 5 OS=Homo sapiens OX=9606 GN=HAUS5 PE=1 SV=2	11	6	15	6	71.6	HAUS5	1.5041e+06	1.09497e+06	1.29953e+06	3.71809e+06	3.6205e+06	3.6693e+06	3.38738e+06	3.8191e+06	3.60324e+06	2.36976e+06	2.30371e+06
High	Master Protein	O43347	RNA-binding protein Musashi homolog 1 OS=Homo sapiens OX=9606 GN=MSI1 PE=1 SV=1	21	5	15	5	39.1	MSI1	178097	133818	155958	2.0911e+07	1.77553e+07	1.93332e+07	1.32413e+07	1.66716e+07	1.49564e+07	1.91772e+07	1.48004e+07
High	Master Protein	P09622	Dihydrolipoyl dehydrogenase, mitochondrial OS=Homo sapiens OX=9606 GN=DLD PE=1 SV=2	13	5	15	5	54.1	DLD	733899	709937	721918	5.13372e+06	5.26169e+06	5.1977e+06	5.11484e+06	5.79984e+06	5.45734e+06	4.47579e+06	4.73542e+06
High	Master Protein	Q9P0T7	Proton-transporting V-type ATPase complex assembly regulator TMEM9 OS=Homo sapiens OX=9606 GN=TMEM9 PE=1 SV=1	17	2	14	2	20.6	TMEM9			#DIV/0!	6.62222e+06	3.93597e+06	5.2791e+06	4.06547e+06	5.451e+06	4.75824e+06	#DIV/0!	#DIV/0!
High	Master Protein	Q96C36	Pyrroline-5-carboxylate reductase 2 OS=Homo sapiens OX=9606 GN=PYCR2 PE=1 SV=1	21	5	14	4	33.6	PYCR2	619951	261913	440932	7.48114e+06	7.406e+06	7.44357e+06	4.05476e+06	6.68895e+06	5.37186e+06	7.00264e+06	4.93092e+06
High	Master Protein	Q9UID3	Vacuolar protein sorting-associated protein 51 homolog OS=Homo sapiens OX=9606 GN=VPS51 PE=1 SV=2	9	6	14	6	86	VPS51	442244	162320	302282	3.00634e+06	3623447	3.31489e+06	4.31485e+06	2.49061e+06	3.40273e+06	3.01261e+06	3.10045e+06
High	Master Protein	Q9Y5Y0	Heme transporter FLVCR1 OS=Homo sapiens OX=9606 GN=FLVCR1 PE=1 SV=1	11	4	14	4	59.8	FLVCR1			#DIV/0!	1.67467e+07	1.17107e+07	1.42287e+07	9.17136e+06	1.02323e+07	9.70181e+06	#DIV/0!	#DIV/0!
High	Master Protein	Q9NUJ3	T-complex protein 11-like protein 1 OS=Homo sapiens OX=9606 GN=TCP11L1 PE=1 SV=1	9	4	14	4	57	TCP11L1			#DIV/0!	3.25025e+06	2.63692e+06	2.94358e+06	2.25789e+06	2.77863e+06	2.51826e+06	#DIV/0!	#DIV/0!
High	Master Protein	P82650	Small ribosomal subunit protein mS22 OS=Homo sapiens OX=9606 GN=MRPS22 PE=1 SV=1	19	5	14	5	41.3	MRPS22	6.19256e+06	5.84375e+06	6.01816e+06	5.90124e+06	4.30949e+06	5.10536e+06	3.39047e+06	4.78034e+06	4.08541e+06	-912794	-1.93275e+06
High	Master Protein	P62318	Small nuclear ribonucleoprotein Sm D3 OS=Homo sapiens OX=9606 GN=SNRPD3 PE=1 SV=1	32	3	14	3	13.9	SNRPD3	3.61251e+06	2.07525e+06	2.84388e+06	1.3894e+07	1.11428e+07	1.25184e+07	9.69123e+06	9.39653e+06	9.54388e+06	9.67449e+06	6.7e+06
High	Master Protein	P33176	Kinesin-1 heavy chain OS=Homo sapiens OX=9606 GN=KIF5B PE=1 SV=1	11	8	14	6	109.6	KIF5B	9209798	2.62856e+06	5.91918e+06	4.66672e+06	1.05177e+06	2.85924e+06	3.41049e+06	1.9773e+06	2.69389e+06	-3.05994e+06	-3.22529e+06
High	Master Protein	P35670	Copper-transporting ATPase 2 OS=Homo sapiens OX=9606 GN=ATP7B PE=1 SV=4	4	6	14	6	157.2	ATP7B	23634.3		23634.3	1.57985e+07	1.29144e+07	1.43565e+07	8.87114e+06	8.28527e+06	8.57821e+06	1.43328e+07	8.55457e+06
High	Master Protein	Q8N1B4	Vacuolar protein sorting-associated protein 52 homolog OS=Homo sapiens OX=9606 GN=VPS52 PE=1 SV=1	13	6	14	6	82.2	VPS52	468673	374774	421723	4.5121e+06	4.76213e+06	4.63712e+06	3.69264e+06	3.789e+06	3.74082e+06	4.21539e+06	3.3191e+06
High	Master Protein	Q6WCQ1	Myosin phosphatase Rho-interacting protein OS=Homo sapiens OX=9606 GN=MPRIP PE=1 SV=3	6	5	14	5	116.5	MPRIP	3.35259e+06	2508664	2.93063e+06	5.72181e+06	6.30537e+06	6.01359e+06	2.1117e+06	1.56316e+06	1.83743e+06	3.08296e+06	-1.0932e+06
High	Master Protein	Q9H2P0	Activity-dependent neuroprotector homeobox protein OS=Homo sapiens OX=9606 GN=ADNP PE=1 SV=1	5	5	14	5	123.5	ADNP	627734	854453	741093	4.45443e+06	3.64966e+06	4.05205e+06	2.44921e+06	2.8139e+06	2.63156e+06	3.31095e+06	1.89046e+06
High	Master Protein	Q16629	Serine/arginine-rich splicing factor 7 OS=Homo sapiens OX=9606 GN=SRSF7 PE=1 SV=1	24	5	14	5	27.4	SRSF7	9.34162e+06	5.83241e+06	7.58701e+06	2.81207e+07	2.252e+07	2.53203e+07	1.33197e+07	2.12582e+07	1.7289e+07	1.77333e+07	9.70195e+06
High	Master Protein	Q9P0L0	Vesicle-associated membrane protein-associated protein A OS=Homo sapiens OX=9606 GN=VAPA PE=1 SV=3	24	4	14	3	27.9	VAPA	140560	117052	128806	4.24655e+06	2.3389e+06	3.29272e+06	1.47139e+06	2.14824e+06	1.80982e+06	3.16392e+06	1.68101e+06
High	Master Protein	Q7Z434	Mitochondrial antiviral-signaling protein OS=Homo sapiens OX=9606 GN=MAVS PE=1 SV=2	15	4	14	4	56.5	MAVS	1.30739e+06	854057	1.08072e+06	7.97651e+06	5.09965e+06	6.53808e+06	6.29069e+06	5.25884e+06	5.77477e+06	5.45736e+06	4.69404e+06
High	Master Protein	Q96RT1	Erbin OS=Homo sapiens OX=9606 GN=ERBIN PE=1 SV=2	5	6	14	6	158.2	ERBIN	789896	497303	643600	1.0672e+07	6.37823e+06	8.52514e+06	6.48775e+06	6.1568e+06	6.32228e+06	7.88154e+06	5.67868e+06
High	Master Protein	P07948	Tyrosine-protein kinase Lyn OS=Homo sapiens OX=9606 GN=LYN PE=1 SV=3	10	5	14	3	58.5	LYN		571171	571171	3.26813e+06	3.56697e+06	3.41755e+06	2.15995e+06	2.34644e+06	2.25319e+06	2.84638e+06	1.68202e+06
High	Master Protein	P34897	Serine hydroxymethyltransferase, mitochondrial OS=Homo sapiens OX=9606 GN=SHMT2 PE=1 SV=3	13	6	14	6	56	SHMT2	3.98193e+06	2.36762e+06	3.17477e+06	8.82212e+06	8.22796e+06	8.52504e+06	5.03241e+06	5.66377e+06	5.34809e+06	5.35027e+06	2.17332e+06
High	Master Protein	Q15904	V-type proton ATPase subunit S1 OS=Homo sapiens OX=9606 GN=ATP6AP1 PE=1 SV=2	15	5	14	5	52	ATP6AP1			#DIV/0!	9.89049e+06	6.03643e+06	7.96346e+06	6.32571e+06	8.95046e+06	7.63809e+06	#DIV/0!	#DIV/0!
High	Master Protein	Q14145	Kelch-like ECH-associated protein 1 OS=Homo sapiens OX=9606 GN=KEAP1 PE=1 SV=2	7	4	14	4	69.6	KEAP1	589689	1.2033e+06	896494	9.67091e+06	9.59931e+06	9.63511e+06	6.33349e+06	8.26177e+06	7.29763e+06	8.73862e+06	6.40113e+06
High	Master Protein	Q6PI48	Aspartate--tRNA ligase, mitochondrial OS=Homo sapiens OX=9606 GN=DARS2 PE=1 SV=1	15	7	14	7	73.5	DARS2	558829	588494	573661	9.08742e+06	7.22068e+06	8.15405e+06	6.54875e+06	8.36392e+06	7.45634e+06	7.58039e+06	6.88268e+06
High	Master Protein	Q12983	BCL2/adenovirus E1B 19 kDa protein-interacting protein 3 OS=Homo sapiens OX=9606 GN=BNIP3 PE=1 SV=4	23	5	14	5	21.5	BNIP3	177424	133942	155683	1.56561e+07	9.77155e+06	1.27138e+07	7.92529e+06	1.18592e+07	9.89225e+06	1.25581e+07	9.73657e+06
High	Master Protein	Q8NB90	ATPase family gene 2 protein homolog A OS=Homo sapiens OX=9606 GN=AFG2A PE=1 SV=3	4	3	14	2	97.8	AFG2A			#DIV/0!	535339	338346	436843	310130	417280	363705	#DIV/0!	#DIV/0!
High	Master Protein	O75947	ATP synthase subunit d, mitochondrial OS=Homo sapiens OX=9606 GN=ATP5PD PE=1 SV=3	44	6	14	6	18.5	ATP5PD	578318	519304	548811	2.70219e+07	1.81057e+07	2.25638e+07	1.5068e+07	2.04972e+07	1.77826e+07	2.2015e+07	1.72338e+07
High	Master Protein	Q8IY26	Polyisoprenoid diphosphate/phosphate phosphohydrolase PLPP6 OS=Homo sapiens OX=9606 GN=PLPP6 PE=1 SV=3	20	5	14	5	32.2	PLPP6	563730	274796	419263	2.21031e+07	1.74165e+07	1.97598e+07	1.60109e+07	1.57793e+07	1.58951e+07	1.93405e+07	1.54758e+07
High	Master Protein	P30825	High affinity cationic amino acid transporter 1 OS=Homo sapiens OX=9606 GN=SLC7A1 PE=1 SV=1	8	4	14	3	67.6	SLC7A1		43077.6	43077.6	2.00083e+07	1.49127e+07	1.74605e+07	1.51035e+07	1.41095e+07	1.46065e+07	1.74174e+07	1.45634e+07
High	Master Protein	Q6PKG0	La-related protein 1 OS=Homo sapiens OX=9606 GN=LARP1 PE=1 SV=2	9	7	14	7	123.4	LARP1	4.77291e+06	4.97822e+06	4.87556e+06	1.50435e+07	1.19093e+07	1.34764e+07	1.07203e+07	1.09662e+07	1.08432e+07	8.60087e+06	5.96768e+06
High	Master Protein	O14880	Glutathione S-transferase 3, mitochondrial OS=Homo sapiens OX=9606 GN=MGST3 PE=1 SV=1	14	2	14	2	16.5	MGST3	1.01041e+06	880106	945259	10061433	8.24915e+06	9.15529e+06	8717747	8.24582e+06	8.48178e+06	8.21003e+06	7.53652e+06
High	Master Protein	Q9NUQ2	1-acyl-sn-glycerol-3-phosphate acyltransferase epsilon OS=Homo sapiens OX=9606 GN=AGPAT5 PE=1 SV=3	17	5	14	5	42	AGPAT5	26262.8	39847.7	33055.2	3.19247e+06	2.86671e+06	3.02959e+06	7.92718e+06	9.67092e+06	8.79905e+06	2.99654e+06	8.76599e+06
High	Master Protein	Q8NBS9	Thioredoxin domain-containing protein 5 OS=Homo sapiens OX=9606 GN=TXNDC5 PE=1 SV=2	18	6	14	6	47.6	TXNDC5	924765	312151	618458	7.67326e+06	9.09434e+06	8.3838e+06	6.65287e+06	8.3365e+06	7.49469e+06	7.76534e+06	6.87623e+06
High	Master Protein	Q96EY7	Small ribosomal subunit protein mS39 OS=Homo sapiens OX=9606 GN=PTCD3 PE=1 SV=3	9	5	14	5	78.5	PTCD3	2.15286e+06	420251	1.28655e+06	8.27095e+06	7.48855e+06	7.87975e+06	5.06398e+06	6.7006e+06	5.88229e+06	6.5932e+06	4.59573e+06
High	Master Protein	Q9P258	Protein RCC2 OS=Homo sapiens OX=9606 GN=RCC2 PE=1 SV=2	17	8	14	8	56	RCC2	408303	537474	472889	3383808	5.91012e+06	4.64696e+06	3.31621e+06	3.65727e+06	3.48674e+06	4.17408e+06	3.01385e+06
High	Master Protein	Q9Y2V7	Conserved oligomeric Golgi complex subunit 6 OS=Homo sapiens OX=9606 GN=COG6 PE=1 SV=2	8	5	14	5	73.2	COG6		261261	261261	1.11072e+07	8.85401e+06	9.98059e+06	7.30044e+06	6.75376e+06	7027098	9.71933e+06	6.76584e+06
High	Master Protein	Q13501	Sequestosome-1 OS=Homo sapiens OX=9606 GN=SQSTM1 PE=1 SV=1	19	5	14	5	47.7	SQSTM1	3.0614e+06	2.19038e+06	2.62589e+06	5.93522e+06	8.67963e+06	7.30742e+06	3.07057e+06	4.46723e+06	3.7689e+06	4.68153e+06	1.14301e+06
High	Master Protein	P55011	Solute carrier family 12 member 2 OS=Homo sapiens OX=9606 GN=SLC12A2 PE=1 SV=1	6	5	14	5	131.4	SLC12A2		26947.1	26947.1	9.10103e+06	5.73844e+06	7.41974e+06	5.0243e+06	4.87042e+06	4.94736e+06	7.39279e+06	4.92041e+06
High	Master Protein	Q6IBW4	Condensin-2 complex subunit H2 OS=Homo sapiens OX=9606 GN=NCAPH2 PE=1 SV=1	12	8	14	8	68.2	NCAPH2	3.40017e+06	1.79058e+06	2.59538e+06	1.52402e+07	1.1333e+07	1.32866e+07	9.72495e+06	1.18761e+07	1.08005e+07	1.06912e+07	8.20516e+06
High	Master Protein	Q16181	Septin-7 OS=Homo sapiens OX=9606 GN=SEPTIN7 PE=1 SV=2	13	4	14	3	50.6	SEPTIN7	5.09278e+06	2.5995e+06	3.84614e+06	663794	497903	580848			#DIV/0!	-3.26529e+06	#DIV/0!
High	Master Protein	P10515	Dihydrolipoyllysine-residue acetyltransferase component of pyruvate dehydrogenase complex, mitochondrial OS=Homo sapiens OX=9606 GN=DLAT PE=1 SV=3	11	6	14	6	69	DLAT	1.96614e+06	697071	1.33161e+06	7072398	7.26313e+06	7.16777e+06	5.60647e+06	6592051	6.09926e+06	5.83616e+06	4.76766e+06
High	Master Protein	P52701	DNA mismatch repair protein Msh6 OS=Homo sapiens OX=9606 GN=MSH6 PE=1 SV=2	8	7	14	7	152.7	MSH6	613626	195772	404699	1.23215e+07	8.12573e+06	1.02236e+07	8.14237e+06	8.0457e+06	8.09404e+06	9.81889e+06	7.68934e+06
High	Master Protein	Q9UJX3	Anaphase-promoting complex subunit 7 OS=Homo sapiens OX=9606 GN=ANAPC7 PE=1 SV=5	14	7	14	7	63.1	ANAPC7			#DIV/0!	8.52885e+06	5.65398e+06	7.09142e+06	7.94894e+06	6.80519e+06	7.37706e+06	#DIV/0!	#DIV/0!
High	Master Protein	Q9NVA2	Septin-11 OS=Homo sapiens OX=9606 GN=SEPTIN11 PE=1 SV=3	10	4	14	3	49.4	SEPTIN11	1.12079e+07	7.53786e+06	9.37289e+06	3.5045e+06	2.54785e+06	3.02617e+06	2.18155e+06	2.52295e+06	2.35225e+06	-6.34671e+06	-7.02064e+06
High	Master Protein	Q13144	Translation initiation factor eIF-2B subunit epsilon OS=Homo sapiens OX=9606 GN=EIF2B5 PE=1 SV=3	14	6	14	6	80.3	EIF2B5			#DIV/0!	8.63897e+06	6.69666e+06	7.66781e+06	7.47318e+06	5.84992e+06	6.66155e+06	#DIV/0!	#DIV/0!
High	Master Protein	P30260	Cell division cycle protein 27 homolog OS=Homo sapiens OX=9606 GN=CDC27 PE=1 SV=2	9	6	14	6	91.8	CDC27	167287	341402	254344	6.25317e+06	2.87782e+06	4.5655e+06	2.87982e+06	6.17684e+06	4.52833e+06	4.31115e+06	4.27399e+06
High	Master Protein	Q9UNL2	Translocon-associated protein subunit gamma OS=Homo sapiens OX=9606 GN=SSR3 PE=1 SV=1	17	3	14	3	21.1	SSR3	2.80221e+06	947331	1.87477e+06	5.39401e+07	3.32287e+07	4.35844e+07	33450435	2.84409e+07	3.09456e+07	4.17096e+07	2.90709e+07
High	Master Protein	Q6R327	Rapamycin-insensitive companion of mTOR OS=Homo sapiens OX=9606 GN=RICTOR PE=1 SV=1	6	8	14	8	192.1	RICTOR	315183	266856	291019	4.15057e+06	2.7613e+06	3.45593e+06	2.41577e+06	2.42041e+06	2.41809e+06	3.16491e+06	2.12707e+06
High	Master Protein	Q96KR1	Zinc finger RNA-binding protein OS=Homo sapiens OX=9606 GN=ZFR PE=1 SV=2	9	6	14	6	116.9	ZFR			#DIV/0!	2.17707e+06	1.29119e+06	1.73413e+06	1.60852e+06	1.23835e+06	1.42343e+06	#DIV/0!	#DIV/0!
High	Master Protein	Q14681	BTB/POZ domain-containing protein KCTD2 OS=Homo sapiens OX=9606 GN=KCTD2 PE=1 SV=3	27	4	14	4	28.5	KCTD2		265206	265206	15992654	1.16901e+07	1.38414e+07	9.9255e+06	1.46609e+07	1.22932e+07	1.35762e+07	1.2028e+07
High	Master Protein	O76024	Wolframin OS=Homo sapiens OX=9606 GN=WFS1 PE=1 SV=2	10	7	14	7	100.2	WFS1			#DIV/0!	1.18265e+07	8.03962e+06	9.93306e+06	6.50115e+06	6.15414e+06	6.32764e+06	#DIV/0!	#DIV/0!
High	Master Protein	Q9Y2X9	Zinc finger protein 281 OS=Homo sapiens OX=9606 GN=ZNF281 PE=1 SV=1	8	5	14	5	96.9	ZNF281	131441		131441	7.8096e+06	3.24072e+06	5.52516e+06	5.45266e+06	5.14235e+06	5.2975e+06	5.39372e+06	5.16606e+06
High	Master Protein	Q14839	Chromodomain-helicase-DNA-binding protein 4 OS=Homo sapiens OX=9606 GN=CHD4 PE=1 SV=2	5	8	14	8	217.9	CHD4	2.21325e+06	1.70075e+06	1.957e+06	9.90047e+06	7.65331e+06	8.77689e+06	4.79499e+06	4.27733e+06	4.53616e+06	6.81989e+06	2.57916e+06
High	Master Protein	O15042	U2 snRNP-associated SURP motif-containing protein OS=Homo sapiens OX=9606 GN=U2SURP PE=1 SV=2	5	5	14	5	118.2	U2SURP	512241	452996	482618	1.00368e+07	7.05471e+06	8.54576e+06	6.69638e+06	7.20593e+06	6.95115e+06	8.06314e+06	6.46854e+06
High	Master Protein	Q5HYI8	Rab-like protein 3 OS=Homo sapiens OX=9606 GN=RABL3 PE=1 SV=1	27	5	14	5	26.4	RABL3	2.04393e+06	652580	1.34825e+06	1.20084e+07	7.83767e+06	9.92302e+06	6.9908e+06	1.11389e+07	9.06483e+06	8.57476e+06	7.71658e+06
High	Master Protein	P30519	Heme oxygenase 2 OS=Homo sapiens OX=9606 GN=HMOX2 PE=1 SV=2	19	4	14	4	36	HMOX2			#DIV/0!	9.67989e+06	7.15486e+06	8.41738e+06	6.44195e+06	7.67332e+06	7.05764e+06	#DIV/0!	#DIV/0!
High	Master Protein	Q8NBU5	Outer mitochondrial transmembrane helix translocase OS=Homo sapiens OX=9606 GN=ATAD1 PE=1 SV=1	13	4	13	4	40.7	ATAD1	184689	96928.6	140809	6.95199e+06	2565446	4.75872e+06	2.83384e+06	4.318e+06	3.57592e+06	4.61791e+06	3.43511e+06
High	Master Protein	P62820	Ras-related protein Rab-1A OS=Homo sapiens OX=9606 GN=RAB1A PE=1 SV=3	24	4	13	1	22.7	RAB1A	1.75168e+06	1.73364e+06	1.74266e+06	1.03478e+07	7.06555e+06	8.70667e+06	8.1278e+06	9.6072e+06	8.8675e+06	6.96401e+06	7.12484e+06
High	Master Protein	P26196	Probable ATP-dependent RNA helicase DDX6 OS=Homo sapiens OX=9606 GN=DDX6 PE=1 SV=2	17	5	13	5	54.4	DDX6	3.04291e+06	3.10935e+06	3076130	1.03182e+07	7.97266e+06	9.14541e+06	5.4887e+06	6.20044e+06	5.84457e+06	6.06928e+06	2.76844e+06
High	Master Protein	O15260	Surfeit locus protein 4 OS=Homo sapiens OX=9606 GN=SURF4 PE=1 SV=3	17	4	13	4	30.4	SURF4	362282	168665	265473	26481621	2.82891e+07	2.73854e+07	25466835	2.33066e+07	2.43867e+07	2.71199e+07	2.41212e+07
High	Master Protein	Q96MW5	Conserved oligomeric Golgi complex subunit 8 OS=Homo sapiens OX=9606 GN=COG8 PE=1 SV=2	17	7	13	7	68.4	COG8			#DIV/0!	9.03293e+06	8.63465e+06	8.83379e+06	7.59166e+06	7597728	7.59469e+06	#DIV/0!	#DIV/0!
High	Master Protein	O60784	Target of Myb1 membrane trafficking protein OS=Homo sapiens OX=9606 GN=TOM1 PE=1 SV=2	15	4	13	4	53.8	TOM1	872660	740609	806634	7.5084e+06	5.87792e+06	6.69316e+06	5.49067e+06	5519303	5.50499e+06	5.88652e+06	4.69835e+06
High	Master Protein	Q14244	Ensconsin OS=Homo sapiens OX=9606 GN=MAP7 PE=1 SV=1	6	4	13	4	84	MAP7	2.25182e+07	1.38156e+07	1.81669e+07	2.58313e+06	2.60109e+06	2.59211e+06	1.52205e+06	1.87634e+06	1.6992e+06	-1.55748e+07	-1.64677e+07
High	Master Protein	P23381	Tryptophan--tRNA ligase, cytoplasmic OS=Homo sapiens OX=9606 GN=WARS1 PE=1 SV=2	12	4	13	4	53.1	WARS1	9.60433e+06	4.66185e+06	7.13309e+06	2.52398e+06	2.15558e+06	2.33978e+06	1.6013e+06	1.87679e+06	1.73905e+06	-4.79331e+06	-5.39405e+06
High	Master Protein	Q9Y5Y2	Cytosolic Fe-S cluster assembly factor NUBP2 OS=Homo sapiens OX=9606 GN=NUBP2 PE=1 SV=1	33	5	13	5	28.8	NUBP2	450532	2.04405e+06	1.24729e+06	1.4518e+07	12729288	1.36237e+07	8.36341e+06	1.46084e+07	1.14859e+07	1.23764e+07	1.02386e+07
High	Master Protein	O15145	Actin-related protein 2/3 complex subunit 3 OS=Homo sapiens OX=9606 GN=ARPC3 PE=1 SV=3	15	2	13	2	20.5	ARPC3	1.69562e+06	1.28813e+06	1.49187e+06	7.00044e+06	3.62985e+06	5.31514e+06	2.94379e+06	3.84147e+06	3.39263e+06	3.82327e+06	1.90076e+06
High	Master Protein	Q8TEQ8	GPI ethanolamine phosphate transferase 3 OS=Homo sapiens OX=9606 GN=PIGO PE=1 SV=3	12	9	13	9	118.6	PIGO		79471.8	79471.8	1.16969e+07	7.47284e+06	9.58485e+06	6.52533e+06	6.02818e+06	6.27676e+06	9.50538e+06	6.19729e+06
High	Master Protein	Q15363	Transmembrane emp24 domain-containing protein 2 OS=Homo sapiens OX=9606 GN=TMED2 PE=1 SV=1	15	3	13	3	22.7	TMED2		109529	109529	8.00986e+06	4.52976e+06	6.26981e+06	3.32598e+06	3.95579e+06	3.64089e+06	6.16028e+06	3.53136e+06
High	Master Protein	Q86Y07	Serine/threonine-protein kinase VRK2 OS=Homo sapiens OX=9606 GN=VRK2 PE=1 SV=3	12	5	13	5	58.1	VRK2		138566	138566	1.20271e+07	1.04249e+07	1.1226e+07	6.11605e+06	8.26731e+06	7.19168e+06	1.10874e+07	7.05311e+06
High	Master Protein	Q9H2J7	Sodium-dependent neutral amino acid transporter B(0)AT2 OS=Homo sapiens OX=9606 GN=SLC6A15 PE=1 SV=1	11	5	13	5	81.8	SLC6A15		143692	143692	1.07729e+07	5.15599e+06	7.96442e+06	6.08436e+06	5.92344e+06	6.0039e+06	7.82073e+06	5.86021e+06
High	Master Protein	Q96JQ2	Calmin OS=Homo sapiens OX=9606 GN=CLMN PE=1 SV=1	7	5	13	5	111.6	CLMN	1.32347e+06	2.05423e+06	1.68885e+06	5.43488e+06	4.74273e+06	5.08881e+06	3.63961e+06	4.82999e+06	4.2348e+06	3.39996e+06	2.54596e+06
High	Master Protein	Q68E01	Integrator complex subunit 3 OS=Homo sapiens OX=9606 GN=INTS3 PE=1 SV=1	6	4	13	4	118	INTS3			#DIV/0!	3.51115e+06	2.75159e+06	3.13137e+06	1.99521e+06	1.77305e+06	1.88413e+06	#DIV/0!	#DIV/0!
High	Master Protein	P42285	Exosome RNA helicase MTR4 OS=Homo sapiens OX=9606 GN=MTREX PE=1 SV=3	4	4	13	4	117.7	MTREX	1.12256e+06	670907	896733	9773250	7.02819e+06	8.40072e+06	6.86658e+06	8.04746e+06	7.45702e+06	7.50399e+06	6.56029e+06
High	Master Protein	Q96RG2	PAS domain-containing serine/threonine-protein kinase OS=Homo sapiens OX=9606 GN=PASK PE=1 SV=3	6	5	13	5	142.8	PASK			#DIV/0!	7.80541e+06	8.06217e+06	7933789	4.51117e+06	2771203	3.64118e+06	#DIV/0!	#DIV/0!
High	Master Protein	Q14677	Clathrin interactor 1 OS=Homo sapiens OX=9606 GN=CLINT1 PE=1 SV=1	11	5	13	5	68.2	CLINT1	2.37627e+06	2.07363e+06	2.22495e+06	7.78359e+06	7.28076e+06	7.53218e+06	4.88423e+06	6.68244e+06	5.78334e+06	5.30723e+06	3.55839e+06
High	Master Protein	Q9UMS4	Pre-mRNA-processing factor 19 OS=Homo sapiens OX=9606 GN=PRPF19 PE=1 SV=1	15	6	13	6	55.1	PRPF19	1.13466e+08	7.74425e+07	9.54543e+07	4.43501e+06	3183818	3.80942e+06	3.11429e+06	3.34591e+06	3.2301e+06	-9.16449e+07	-9.22242e+07
High	Master Protein	E9PAV3	Nascent polypeptide-associated complex subunit alpha, muscle-specific form OS=Homo sapiens OX=9606 GN=NACA PE=1 SV=1	1	2	13	2	205.3	NACA	4273071	2627464	3.45027e+06	3.70536e+06	3177125	3.44124e+06	1.8925e+06	3063804	2.47815e+06	-9024.12	-972114
High	Master Protein	O95782	AP-2 complex subunit alpha-1 OS=Homo sapiens OX=9606 GN=AP2A1 PE=1 SV=3	5	4	13	4	107.5	AP2A1	2.16879e+06	1.94283e+06	2.05581e+06	4.99093e+06	4.48593e+06	4.73843e+06	2.65614e+06	3.71435e+06	3.18525e+06	2.68262e+06	1129437
High	Master Protein	Q9HCC0	Methylcrotonoyl-CoA carboxylase beta chain, mitochondrial OS=Homo sapiens OX=9606 GN=MCCC2 PE=1 SV=1	13	7	13	7	61.3	MCCC2	510491	550232	530361	6.92708e+06	5564021	6.24555e+06	4.28301e+06	5.67778e+06	4.98039e+06	5.71519e+06	4.45003e+06
High	Master Protein	P56962	Syntaxin-17 OS=Homo sapiens OX=9606 GN=STX17 PE=1 SV=2	18	3	13	3	33.4	STX17			#DIV/0!	2.64972e+06	2.30621e+06	2.47797e+06	1.63383e+06	2.28243e+06	1.95813e+06	#DIV/0!	#DIV/0!
High	Master Protein	Q15477	Superkiller complex protein 2 OS=Homo sapiens OX=9606 GN=SKIC2 PE=1 SV=3	7	5	13	5	137.7	SKIC2	207421	242048	224734	6.30739e+06	4.70582e+06	5.50661e+06	4.58375e+06	5.04767e+06	4.81571e+06	5.28187e+06	4.59098e+06
High	Master Protein	Q9H5Q4	Dimethyladenosine transferase 2, mitochondrial OS=Homo sapiens OX=9606 GN=TFB2M PE=1 SV=1	15	5	13	5	45.3	TFB2M	98127.4		98127.4	9.32689e+06	5.83077e+06	7.57883e+06	4.90303e+06	4.82006e+06	4.86155e+06	7.4807e+06	4.76342e+06
High	Master Protein	Q12789	General transcription factor 3C polypeptide 1 OS=Homo sapiens OX=9606 GN=GTF3C1 PE=1 SV=4	4	7	13	7	238.7	GTF3C1		1.06805e+06	1.06805e+06	1.06715e+07	9.07398e+06	9.87275e+06	5.52547e+06	4.86628e+06	5.19588e+06	8.8047e+06	4.12783e+06
High	Master Protein	P30101	Protein disulfide-isomerase A3 OS=Homo sapiens OX=9606 GN=PDIA3 PE=1 SV=4	21	7	13	7	56.7	PDIA3	3.90793e+06	1.0357e+06	2.47182e+06	8.79612e+06	7.7273e+06	8.26171e+06	4.9117e+06	5.76051e+06	5.33611e+06	5.78989e+06	2.86429e+06
High	Master Protein	O94776	Metastasis-associated protein MTA2 OS=Homo sapiens OX=9606 GN=MTA2 PE=1 SV=1	8	5	13	4	75	MTA2	1.34564e+06	1.21613e+06	1.28089e+06	5.90159e+06	4043061	4.97233e+06	2.73934e+06	3.77282e+06	3.25608e+06	3.69144e+06	1.97519e+06
High	Master Protein	Q99661	Kinesin-like protein KIF2C OS=Homo sapiens OX=9606 GN=KIF2C PE=1 SV=2	8	5	13	5	81.3	KIF2C	2.42581e+06	1.76716e+06	2.09648e+06	1.59685e+06	1.75057e+06	1.67371e+06	1.42258e+06	1.61007e+06	1.51632e+06	-422774	-580161
High	Master Protein	Q2TAL8	Transcriptional regulator QRICH1 OS=Homo sapiens OX=9606 GN=QRICH1 PE=1 SV=1	11	7	13	7	86.4	QRICH1	890262	540476	715369	7.76857e+06	6.30103e+06	7.0348e+06	5.42882e+06	5.62431e+06	5.52656e+06	6.31943e+06	4.8112e+06
High	Master Protein	P06241	Tyrosine-protein kinase Fyn OS=Homo sapiens OX=9606 GN=FYN PE=1 SV=3	8	5	13	3	60.7	FYN	648850	558383	603617	6.17615e+06	7.12317e+06	6.64966e+06	5.67878e+06	3.92367e+06	4.80122e+06	6.04604e+06	4.19761e+06
High	Master Protein	Q9P0K7	Ankycorbin OS=Homo sapiens OX=9606 GN=RAI14 PE=1 SV=2	8	7	13	7	110	RAI14	2.08574e+06	1.81268e+06	1.94921e+06	5.9368e+06	5.44907e+06	5.69294e+06	1.14033e+06	874701	1.00752e+06	3.74373e+06	-941693
High	Master Protein	Q9H9J2	Large ribosomal subunit protein mL44 OS=Homo sapiens OX=9606 GN=MRPL44 PE=1 SV=1	10	4	13	4	37.5	MRPL44			#DIV/0!	7.18995e+06	3.2549e+06	5.22242e+06	3.8598e+06	5.03162e+06	4.44571e+06	#DIV/0!	#DIV/0!
High	Master Protein	P60174	Triosephosphate isomerase OS=Homo sapiens OX=9606 GN=TPI1 PE=1 SV=4	31	6	13	6	26.7	TPI1	5.2392e+06	3.63193e+06	4.43557e+06	9.17741e+06	6.81226e+06	7.99483e+06	2.61815e+06	5.90443e+06	4.26129e+06	3.55927e+06	-174274
High	Master Protein	A6NHR9	Structural maintenance of chromosomes flexible hinge domain-containing protein 1 OS=Homo sapiens OX=9606 GN=SMCHD1 PE=1 SV=2	3	6	13	6	226.2	SMCHD1			#DIV/0!	6.18044e+06	4.27099e+06	5.22571e+06	3.36965e+06	3.07827e+06	3.22396e+06	#DIV/0!	#DIV/0!
High	Master Protein	Q8IZ52	Chondroitin sulfate synthase 2 OS=Homo sapiens OX=9606 GN=CHPF PE=1 SV=2	9	5	13	5	85.4	CHPF	115508	181341	148425	8288416	4.98463e+06	6.63652e+06	3.94185e+06	6.78814e+06	5.365e+06	6.4881e+06	5.21657e+06
High	Master Protein	Q8N3U4	Cohesin subunit SA-2 OS=Homo sapiens OX=9606 GN=STAG2 PE=1 SV=3	6	5	13	5	141.2	STAG2		71613.2	71613.2	5.54178e+06	4.55278e+06	5.04728e+06	3.55096e+06	3.5454e+06	3.54818e+06	4.97567e+06	3.47657e+06
High	Master Protein	Q96IU4	Putative protein-lysine deacylase ABHD14B OS=Homo sapiens OX=9606 GN=ABHD14B PE=1 SV=1	22	4	13	4	22.3	ABHD14B	765947	462601	614274	3.82963e+06	3.10438e+06	3.467e+06	2.94937e+06	3.3611e+06	3.15524e+06	2.85273e+06	2.54096e+06
High	Master Protein	P11310	Medium-chain specific acyl-CoA dehydrogenase, mitochondrial OS=Homo sapiens OX=9606 GN=ACADM PE=1 SV=1	14	5	13	5	46.6	ACADM	404584	487412	445998	8.138e+06	4.42056e+06	6.27928e+06	4.46075e+06	5.61831e+06	5.03953e+06	5.83328e+06	4.59353e+06
High	Master Protein	Q15392	Delta(24)-sterol reductase OS=Homo sapiens OX=9606 GN=DHCR24 PE=1 SV=2	9	6	13	6	60.1	DHCR24	1.05181e+06	545708	798759	32026333	2.31319e+07	2.75791e+07	14704615	1.77487e+07	1.62267e+07	2.67804e+07	1.54279e+07
High	Master Protein	P46087	Probable 28S rRNA (cytosine(4447)-C(5))-methyltransferase OS=Homo sapiens OX=9606 GN=NOP2 PE=1 SV=2	8	5	13	5	89.2	NOP2	874114	827633	850874	7.51483e+06	5.17074e+06	6.34278e+06	3.79842e+06	5.38397e+06	4.59119e+06	5.49191e+06	3.74032e+06
High	Master Protein	Q14574	Desmocollin-3 OS=Homo sapiens OX=9606 GN=DSC3 PE=1 SV=3	12	7	13	7	99.9	DSC3	74772.8	678774	376773	7.15237e+06	6.63955e+06	6.89596e+06	4.0616e+06	3.90331e+06	3.98246e+06	6.51919e+06	3.60568e+06
High	Master Protein	P50570	Dynamin-2 OS=Homo sapiens OX=9606 GN=DNM2 PE=1 SV=2	7	5	13	5	98	DNM2	1.65601e+06	1.89799e+06	1.777e+06	8.65847e+06	6.95779e+06	7.80813e+06	8.10512e+06	8.94736e+06	8.52624e+06	6.03113e+06	6.74924e+06
High	Master Protein	Q7L576	Cytoplasmic FMR1-interacting protein 1 OS=Homo sapiens OX=9606 GN=CYFIP1 PE=1 SV=1	4	5	13	5	145.1	CYFIP1	1.93962e+06	1.77738e+06	1.8585e+06	7.65152e+06	8.53716e+06	8.09434e+06	5.02654e+06	5.03284e+06	5.02969e+06	6.23584e+06	3.17119e+06
High	Master Protein	Q6PML9	Proton-coupled zinc antiporter SLC30A9, mitochondrial OS=Homo sapiens OX=9606 GN=SLC30A9 PE=1 SV=1	15	6	13	6	63.5	SLC30A9	336966	137476	237221	1.04388e+07	7.28874e+06	8.86379e+06	4.74224e+06	6.66544e+06	5.70384e+06	8.62657e+06	5.46662e+06
High	Master Protein	Q9P2R7	Succinate--CoA ligase [ADP-forming] subunit beta, mitochondrial OS=Homo sapiens OX=9606 GN=SUCLA2 PE=1 SV=3	8	4	13	4	50.3	SUCLA2	1.62155e+06	1.80151e+06	1.71153e+06	9.76284e+06	9.74643e+06	9.75463e+06	9.40144e+06	1.00819e+07	9.74165e+06	8.04311e+06	8.03012e+06
High	Master Protein	P61158	Actin-related protein 3 OS=Homo sapiens OX=9606 GN=ACTR3 PE=1 SV=3	14	4	13	4	47.3	ACTR3	945764	931294	938529	4.29393e+06	4.5647e+06	4.42931e+06	2.27063e+06	4.99156e+06	3.63109e+06	3.49079e+06	2.69257e+06
High	Master Protein	Q92552	Small ribosomal subunit protein mS27 OS=Homo sapiens OX=9606 GN=MRPS27 PE=1 SV=3	12	4	13	4	47.6	MRPS27	2.36762e+06	766184	1.5669e+06	12643542	1.12629e+07	1.19532e+07	8.08307e+06	1.00887e+07	9.08587e+06	1.03863e+07	7.51897e+06
High	Master Protein	Q96C19	EF-hand domain-containing protein D2 OS=Homo sapiens OX=9606 GN=EFHD2 PE=1 SV=1	16	4	13	3	26.7	EFHD2	2.41438e+06	1.42977e+06	1.92207e+06	4.63474e+06	5.04676e+06	4.84075e+06	3.88449e+06	4.32421e+06	4.10435e+06	2.91868e+06	2.18228e+06
High	Master Protein	P50395	Rab GDP dissociation inhibitor beta OS=Homo sapiens OX=9606 GN=GDI2 PE=1 SV=2	14	4	13	4	50.6	GDI2	4.94811e+06	3.29877e+06	4.12344e+06	4675986	3.90219e+06	4.28909e+06	3.51495e+06	2.15915e+06	2.83705e+06	165651	-1.28639e+06
High	Master Protein	Q16795	NADH dehydrogenase [ubiquinone] 1 alpha subcomplex subunit 9, mitochondrial OS=Homo sapiens OX=9606 GN=NDUFA9 PE=1 SV=2	25	7	13	7	42.5	NDUFA9	134486		134486	1.11463e+07	6760046	8.95316e+06	4.32048e+06	7.42478e+06	5.87263e+06	8.81868e+06	5.73814e+06
High	Master Protein	Q9UHD8	Septin-9 OS=Homo sapiens OX=9606 GN=SEPTIN9 PE=1 SV=2	21	8	13	8	65.4	SEPTIN9	1.39136e+07	1.1051e+07	1.24823e+07	1.80787e+06	2.41062e+06	2.10924e+06	866239	1.23845e+06	1.05234e+06	-1.03731e+07	-1.143e+07
High	Master Protein	O75439	Mitochondrial-processing peptidase subunit beta OS=Homo sapiens OX=9606 GN=PMPCB PE=1 SV=2	16	6	13	6	54.3	PMPCB	1.21491e+06	536414	875661	1.03391e+07	9.64506e+06	9.9921e+06	6.60745e+06	7311521	6.95949e+06	9.11644e+06	6.08382e+06
High	Master Protein	Q9BRK5	45 kDa calcium-binding protein OS=Homo sapiens OX=9606 GN=SDF4 PE=1 SV=1	19	6	13	6	41.8	SDF4	3.40281e+06	2.84494e+06	3.12387e+06	19187424	1.32855e+07	1.62365e+07	1.15937e+07	1.58217e+07	1.37077e+07	1.31126e+07	1.05838e+07
High	Master Protein	Q9Y2J2	Band 4.1-like protein 3 OS=Homo sapiens OX=9606 GN=EPB41L3 PE=1 SV=2	9	7	13	7	120.6	EPB41L3	3.92597e+06	2.07798e+06	3.00197e+06	5.59454e+06	2789842	4.19219e+06	3.51823e+06	3.6558e+06	3.58701e+06	1.19021e+06	585038
High	Master Protein	Q5W0B1	ORC ubiquitin ligase 1 OS=Homo sapiens OX=9606 GN=OBI1 PE=1 SV=1	11	6	13	6	81.1	OBI1	1.72654e+06	1.00926e+06	1.3679e+06	1.0063e+07	8.81653e+06	9.43977e+06	5.08377e+06	5.52038e+06	5.30207e+06	8.07187e+06	3.93417e+06
High	Master Protein	O00483	Cytochrome c oxidase subunit NDUFA4 OS=Homo sapiens OX=9606 GN=NDUFA4 PE=1 SV=1	77	5	12	5	9.4	NDUFA4	2.56457e+06	1.27251e+06	1.91854e+06	73593739	5.60764e+07	6.48351e+07	4.60891e+07	55455197	5.07721e+07	6.29165e+07	4.88536e+07
High	Master Protein	P35520	Cystathionine beta-synthase OS=Homo sapiens OX=9606 GN=CBS PE=1 SV=2	12	6	12	6	60.5	CBS	2.78699e+06	1.67348e+06	2.23023e+06	1.14507e+07	7.92227e+06	9.68651e+06	6.88016e+06	8.69937e+06	7.78977e+06	7.45627e+06	5.55953e+06
High	Master Protein	P16989	Y-box-binding protein 3 OS=Homo sapiens OX=9606 GN=YBX3 PE=1 SV=4	16	4	12	1	40.1	YBX3			#DIV/0!	1.11832e+06	605425	861874	528784		528784	#DIV/0!	#DIV/0!
High	Master Protein	O75131	Copine-3 OS=Homo sapiens OX=9606 GN=CPNE3 PE=1 SV=1	6	4	12	4	60.1	CPNE3	1.78613e+06	1.24518e+06	1.51566e+06	5.14352e+06	4.27514e+06	4.70933e+06	3.87915e+06	3.82936e+06	3.85426e+06	3.19367e+06	2.3386e+06
High	Master Protein	P62070	Ras-related protein R-Ras2 OS=Homo sapiens OX=9606 GN=RRAS2 PE=1 SV=1	25	4	12	4	23.4	RRAS2	1.0263e+06	931783	979043	8.00031e+06	5.82853e+06	6.91442e+06	5.58438e+06	7.44352e+06	6.51395e+06	5.93538e+06	5.53491e+06
High	Master Protein	Q86V48	Leucine zipper protein 1 OS=Homo sapiens OX=9606 GN=LUZP1 PE=1 SV=2	4	3	12	3	120.2	LUZP1	618978	438218	528598	324558	1.00051e+06	662535	571279	655654	613466	133937	84868.8
High	Master Protein	P36957	Dihydrolipoyllysine-residue succinyltransferase component of 2-oxoglutarate dehydrogenase complex, mitochondrial OS=Homo sapiens OX=9606 GN=DLST PE=1 SV=4	9	4	12	4	48.7	DLST	2.42451e+06	2.05754e+06	2.24103e+06	6.51932e+06	4.71338e+06	5.61635e+06	4.0145e+06	5.40079e+06	4.70764e+06	3.37533e+06	2.46662e+06
High	Master Protein	O43299	AP-5 complex subunit zeta-1 OS=Homo sapiens OX=9606 GN=AP5Z1 PE=1 SV=2	13	7	12	7	88.5	AP5Z1			#DIV/0!	4.88176e+06	3.69927e+06	4.29052e+06	3.32964e+06	4.35708e+06	3.84336e+06	#DIV/0!	#DIV/0!
High	Master Protein	P59998	Actin-related protein 2/3 complex subunit 4 OS=Homo sapiens OX=9606 GN=ARPC4 PE=1 SV=3	23	4	12	4	19.7	ARPC4	7.65423e+06	7.26764e+06	7.46094e+06	21352354	1.80131e+07	1.96827e+07	6.11123e+06	1.34026e+07	9.75691e+06	1.22218e+07	2.29597e+06
High	Master Protein	Q8WXG6	MAP kinase-activating death domain protein OS=Homo sapiens OX=9606 GN=MADD PE=1 SV=2	3	3	12	3	183.2	MADD	955325	437155	696240	2.69843e+06	801191	1.74981e+06	2.03611e+06	1.87595e+06	1.95603e+06	1.05357e+06	1.25979e+06
High	Master Protein	P51665	26S proteasome non-ATPase regulatory subunit 7 OS=Homo sapiens OX=9606 GN=PSMD7 PE=1 SV=2	25	5	12	5	37	PSMD7	699353	259591	479472	12702201	1.06531e+07	1.16777e+07	10710735	1.2136e+07	1.14234e+07	1.11982e+07	1.09439e+07
High	Master Protein	Q8N122	Regulatory-associated protein of mTOR OS=Homo sapiens OX=9606 GN=RPTOR PE=1 SV=1	4	4	12	4	148.9	RPTOR	155482	104597	130039	3.99028e+06	3.39185e+06	3.69106e+06	2.53684e+06	2.80161e+06	2.66923e+06	3.56103e+06	2.53919e+06
High	Master Protein	P05386	Large ribosomal subunit protein P1 OS=Homo sapiens OX=9606 GN=RPLP1 PE=1 SV=1	52	2	12	2	11.5	RPLP1	2.08006e+07	9.19964e+06	1.50001e+07	5.66339e+07	51839664	5.42368e+07	45880007	39571648	4.27258e+07	3.92367e+07	2.77257e+07
High	Master Protein	Q8WXD5	Gem-associated protein 6 OS=Homo sapiens OX=9606 GN=GEMIN6 PE=1 SV=1	22	3	12	3	18.8	GEMIN6	472234	369791	421012	2.31702e+07	1.42151e+07	1.86927e+07	9.11647e+06	1.17255e+07	1.0421e+07	1.82717e+07	9.99998e+06
High	Master Protein	Q9BUA3	Spindlin interactor and repressor of chromatin-binding protein OS=Homo sapiens OX=9606 GN=SPINDOC PE=1 SV=3	19	4	12	4	41	SPINDOC			#DIV/0!	8.55223e+06	7286181	7.9192e+06	4.81983e+06	5.71474e+06	5.26729e+06	#DIV/0!	#DIV/0!
High	Master Protein	P49755	Transmembrane emp24 domain-containing protein 10 OS=Homo sapiens OX=9606 GN=TMED10 PE=1 SV=2	17	3	12	3	25	TMED10	174324	130975	152649	7.78085e+06	6.17736e+06	6.97911e+06	6.45973e+06	6.79308e+06	6.62641e+06	6.82646e+06	6.47376e+06
High	Master Protein	Q9Y295	Developmentally-regulated GTP-binding protein 1 OS=Homo sapiens OX=9606 GN=DRG1 PE=1 SV=1	11	3	12	3	40.5	DRG1	1.4416e+06	968044	1.20482e+06	2.53278e+06	2.10732e+06	2320050	1.81072e+06	1.86619e+06	1.83845e+06	1.11523e+06	633627
High	Master Protein	Q86W42	THO complex subunit 6 homolog OS=Homo sapiens OX=9606 GN=THOC6 PE=1 SV=1	9	2	12	2	37.5	THOC6	1.64103e+06	1.02107e+06	1.33105e+06	2.81502e+06	2.2029e+06	2.50896e+06	1446051	1857952	1.652e+06	1.17791e+06	320949
High	Master Protein	Q7Z736	Pleckstrin homology domain-containing family H member 3 OS=Homo sapiens OX=9606 GN=PLEKHH3 PE=1 SV=2	7	4	12	4	85.3	PLEKHH3		192918	192918	4.47626e+06	3.7457e+06	4.11098e+06	2.88303e+06	2.89839e+06	2.89071e+06	3.91806e+06	2.6978e+06
High	Master Protein	P49006	MARCKS-related protein OS=Homo sapiens OX=9606 GN=MARCKSL1 PE=1 SV=2	14	2	12	2	19.5	MARCKSL1	3.44065e+06	2054487	2.74757e+06	5.82958e+06	4527990	5.17878e+06	2.53441e+06	3.43587e+06	2.98514e+06	2.43122e+06	237575
High	Master Protein	Q8N2K0	Lysophosphatidylserine lipase ABHD12 OS=Homo sapiens OX=9606 GN=ABHD12 PE=1 SV=2	21	6	12	6	45.1	ABHD12	302190	163540	232865	9.22477e+06	7.43475e+06	8.32976e+06	8.57198e+06	9.26174e+06	8.91686e+06	8.09689e+06	8.68399e+06
High	Master Protein	P00558	Phosphoglycerate kinase 1 OS=Homo sapiens OX=9606 GN=PGK1 PE=1 SV=3	8	2	12	2	44.6	PGK1	4.45127e+06	2.56992e+06	3.51059e+06	8.33259e+06	6552072	7.44233e+06	2854611	2.81407e+06	2.83434e+06	3.93174e+06	-676256
High	Master Protein	Q8TEQ6	Gem-associated protein 5 OS=Homo sapiens OX=9606 GN=GEMIN5 PE=1 SV=3	6	8	12	8	168.5	GEMIN5	1.17517e+06	1.02823e+06	1.1017e+06	9.63445e+06	7.46911e+06	8.55178e+06	6.74938e+06	6.6254e+06	6.68739e+06	7.45008e+06	5.58569e+06
High	Master Protein	Q6P996	Pyridoxal-dependent decarboxylase domain-containing protein 1 OS=Homo sapiens OX=9606 GN=PDXDC1 PE=1 SV=2	10	6	12	6	86.7	PDXDC1			#DIV/0!	8.96649e+06	7.11022e+06	8.03836e+06	5.70197e+06	6.06919e+06	5.88558e+06	#DIV/0!	#DIV/0!
High	Master Protein	Q12965	Unconventional myosin-Ie OS=Homo sapiens OX=9606 GN=MYO1E PE=1 SV=2	4	4	12	4	127	MYO1E	294491	692547	493519	6.40306e+06	2.87987e+06	4.64147e+06	2.99739e+06	2.11327e+06	2.55533e+06	4.14795e+06	2.06181e+06
High	Master Protein	O15355	Protein phosphatase 1G OS=Homo sapiens OX=9606 GN=PPM1G PE=1 SV=1	10	4	12	4	59.2	PPM1G	349403		349403	5.08863e+06	3.6044e+06	4.34652e+06	3.22076e+06	4.13629e+06	3.67852e+06	3.99711e+06	3.32912e+06
High	Master Protein	P40939	Trifunctional enzyme subunit alpha, mitochondrial OS=Homo sapiens OX=9606 GN=HADHA PE=1 SV=2	10	5	12	5	82.9	HADHA	149982	159230	154606	7.51918e+06	4.20133e+06	5.86025e+06	5.47118e+06	4.89772e+06	5.18445e+06	5.70565e+06	5.02985e+06
High	Master Protein	Q8TB61	Adenosine 3'-phospho 5'-phosphosulfate transporter 1 OS=Homo sapiens OX=9606 GN=SLC35B2 PE=1 SV=1	10	4	12	4	47.5	SLC35B2			#DIV/0!	1.56855e+07	12889771	1.42876e+07	6.71738e+06	7.67214e+06	7.19476e+06	#DIV/0!	#DIV/0!
High	Master Protein	Q9NZL4	Hsp70-binding protein 1 OS=Homo sapiens OX=9606 GN=HSPBP1 PE=1 SV=2	9	3	12	3	39.3	HSPBP1	2.09001e+06	1.42089e+06	1.75545e+06	2.98191e+06	3.3418e+06	3.16185e+06	2.80094e+06	3.08742e+06	2.94418e+06	1.4064e+06	1.18873e+06
High	Master Protein	Q15019	Septin-2 OS=Homo sapiens OX=9606 GN=SEPTIN2 PE=1 SV=1	22	6	12	6	41.5	SEPTIN2	6832986	4902234	5867610	2.84082e+06	1.98789e+06	2.41436e+06	2.33269e+06	2.66008e+06	2.49639e+06	-3.45325e+06	-3.37122e+06
High	Master Protein	Q6NTF9	Rhomboid domain-containing protein 2 OS=Homo sapiens OX=9606 GN=RHBDD2 PE=1 SV=2	12	3	12	3	39.2	RHBDD2	446124		446124	1.42577e+07	7.20985e+06	1.07338e+07	6209113	7.65825e+06	6.93368e+06	1.02876e+07	6.48756e+06
High	Master Protein	Q9BU61	NADH dehydrogenase [ubiquinone] 1 alpha subcomplex assembly factor 3 OS=Homo sapiens OX=9606 GN=NDUFAF3 PE=1 SV=1	19	3	12	3	20.3	NDUFAF3	660251		660251	5.68225e+06	3.87055e+06	4.7764e+06	3510036	3.07644e+06	3.29324e+06	4.11615e+06	2.63299e+06
High	Master Protein	O75787	Renin receptor OS=Homo sapiens OX=9606 GN=ATP6AP2 PE=1 SV=2	26	6	12	6	39	ATP6AP2		74566	74566	7.32455e+06	3.99922e+06	5.66189e+06	1.97389e+06	5.58158e+06	3.77773e+06	5.58732e+06	3.70316e+06
High	Master Protein	P62851	Small ribosomal subunit protein eS25 OS=Homo sapiens OX=9606 GN=RPS25 PE=1 SV=1	28	4	12	4	13.7	RPS25	1.39413e+07	8.8887e+06	1.1415e+07	67933965	66296118	6.7115e+07	49272893	58372409	53822651	5.57e+07	4.24077e+07
High	Master Protein	P55884	Eukaryotic translation initiation factor 3 subunit B OS=Homo sapiens OX=9606 GN=EIF3B PE=1 SV=3	4	3	12	3	92.4	EIF3B	3.44942e+06	2.19734e+06	2.82338e+06	8.53154e+06	4.91977e+06	6.72565e+06	6.20366e+06	7.39327e+06	6.79846e+06	3.90227e+06	3.97508e+06
High	Master Protein	O60568	Multifunctional procollagen lysine hydroxylase and glycosyltransferase LH3 OS=Homo sapiens OX=9606 GN=PLOD3 PE=1 SV=1	7	4	12	4	84.7	PLOD3	314624	109660	212142	4.34804e+06	3.81262e+06	4.08033e+06	3.10414e+06	3538926	3.32153e+06	3.86819e+06	3.10939e+06
High	Master Protein	Q9UN37	Vacuolar protein sorting-associated protein 4A OS=Homo sapiens OX=9606 GN=VPS4A PE=1 SV=1	10	3	12	3	48.9	VPS4A	527743	456414	492078	1.78085e+07	8.20311e+06	1.30058e+07	9.59627e+06	8.84972e+06	9.22299e+06	1.25137e+07	8.73091e+06
High	Master Protein	Q9Y6C9	Mitochondrial carrier homolog 2 OS=Homo sapiens OX=9606 GN=MTCH2 PE=1 SV=1	22	5	12	5	33.3	MTCH2	894588	788916	841752	8.89709e+06	8.51659e+06	8.70684e+06	7.06604e+06	8.39088e+06	7.72846e+06	7.86509e+06	6.88671e+06
High	Master Protein	P55265	Double-stranded RNA-specific adenosine deaminase OS=Homo sapiens OX=9606 GN=ADAR PE=1 SV=4	7	7	12	7	136	ADAR	1.66421e+06	1.43648e+06	1.55035e+06	1.01931e+07	7.84869e+06	9.02088e+06	5.65964e+06	6.85169e+06	6.25567e+06	7.47054e+06	4.70532e+06
High	Master Protein	O43491	Band 4.1-like protein 2 OS=Homo sapiens OX=9606 GN=EPB41L2 PE=1 SV=1	4	3	12	3	112.5	EPB41L2	3.42119e+06	3.67786e+06	3.54953e+06	4.83678e+06	3.20095e+06	4.01887e+06	3.06176e+06	4.03419e+06	3.54797e+06	469340	-1554.41
High	Master Protein	Q15390	Mitochondrial fission regulator 1 OS=Homo sapiens OX=9606 GN=MTFR1 PE=1 SV=2	11	3	12	3	37	MTFR1	200954	185150	193052	5.5836e+06	4.19435e+06	4.88898e+06	3.74569e+06	3.23638e+06	3.49103e+06	4.69592e+06	3.29798e+06
High	Master Protein	P49790	Nuclear pore complex protein Nup153 OS=Homo sapiens OX=9606 GN=NUP153 PE=1 SV=2	4	4	12	4	153.8	NUP153	168055	534056	351055	5.675e+06	4.72322e+06	5.19911e+06	3.56848e+06	3.51034e+06	3.53941e+06	4.84805e+06	3.18835e+06
High	Master Protein	Q96H55	Unconventional myosin-XIX OS=Homo sapiens OX=9606 GN=MYO19 PE=1 SV=2	5	4	12	4	109.1	MYO19	339220	59998	199609	4.40308e+06	4.61751e+06	4.51029e+06	3.29246e+06	3.34637e+06	3.31941e+06	4.31069e+06	3.1198e+06
High	Master Protein	Q96G23	Ceramide synthase 2 OS=Homo sapiens OX=9606 GN=CERS2 PE=1 SV=1	7	3	12	3	44.8	CERS2			#DIV/0!	1.5381e+07	1.04963e+07	1.29386e+07	6563345	8.86498e+06	7.71416e+06	#DIV/0!	#DIV/0!
High	Master Protein	P01111	GTPase NRas OS=Homo sapiens OX=9606 GN=NRAS PE=1 SV=1	23	4	12	4	21.2	NRAS	1.3703e+06	1.80313e+06	1.58672e+06	2.14566e+07	1.47382e+07	1.80974e+07	12334518	1.52732e+07	1.38039e+07	1.65107e+07	1.22172e+07
High	Master Protein	Q8TAG9	Exocyst complex component 6 OS=Homo sapiens OX=9606 GN=EXOC6 PE=1 SV=3	5	4	12	4	93.7	EXOC6			#DIV/0!	7.07543e+06	4.85266e+06	5.96405e+06	3.19087e+06	3.59163e+06	3.39125e+06	#DIV/0!	#DIV/0!
High	Master Protein	P08574	Cytochrome c1, heme protein, mitochondrial OS=Homo sapiens OX=9606 GN=CYC1 PE=1 SV=3	16	3	12	3	35.4	CYC1	746510	294986	520748	1.40313e+07	9961965	1.19966e+07	9.05172e+06	12604634	1.08282e+07	1.14759e+07	1.03074e+07
High	Master Protein	P37268	Squalene synthase OS=Homo sapiens OX=9606 GN=FDFT1 PE=1 SV=1	16	5	12	5	48.1	FDFT1		272533	272533	9.53129e+06	7.85134e+06	8.69131e+06	6.96308e+06	7.91567e+06	7439377	8.41878e+06	7.16684e+06
High	Master Protein	Q5XKP0	MICOS complex subunit MIC13 OS=Homo sapiens OX=9606 GN=MICOS13 PE=1 SV=1	69	4	12	4	13.1	MICOS13			#DIV/0!	13378807	1.23227e+07	1.28508e+07	1.09197e+07	10790181	1.0855e+07	#DIV/0!	#DIV/0!
High	Master Protein	Q8IYI6	Exocyst complex component 8 OS=Homo sapiens OX=9606 GN=EXOC8 PE=1 SV=2	12	7	12	7	81.7	EXOC8	94181.5	361172	227677	6.62865e+06	4.67865e+06	5.65365e+06	3.77679e+06	4521009	4.1489e+06	5.42597e+06	3.92122e+06
High	Master Protein	O00767	Stearoyl-CoA desaturase OS=Homo sapiens OX=9606 GN=SCD PE=1 SV=2	9	4	12	4	41.5	SCD		142313	142313	2.67103e+07	1.76717e+07	2.2191e+07	1.39777e+07	15469012	1.47234e+07	2.20487e+07	1.45811e+07
High	Master Protein	P50750	Cyclin-dependent kinase 9 OS=Homo sapiens OX=9606 GN=CDK9 PE=1 SV=3	11	4	12	3	42.8	CDK9	27736.4	151605	89670.6	2.18104e+06	1.67067e+06	1.92586e+06	1.26024e+06	2.00832e+06	1.63428e+06	1.83619e+06	1.54461e+06
High	Master Protein	P05387	Large ribosomal subunit protein P2 OS=Homo sapiens OX=9606 GN=RPLP2 PE=1 SV=1	41	3	12	3	11.7	RPLP2	4.26455e+06	1535356	2.89995e+06	2.32405e+07	1.11904e+07	1.72155e+07	1.04237e+07	1.07732e+07	1.05984e+07	1.43155e+07	7.69848e+06
High	Master Protein	Q12907	Vesicular integral-membrane protein VIP36 OS=Homo sapiens OX=9606 GN=LMAN2 PE=1 SV=1	23	5	12	5	40.2	LMAN2			#DIV/0!	4.18915e+06	2.86523e+06	3.52719e+06	3.38918e+06	4.56595e+06	3.97756e+06	#DIV/0!	#DIV/0!
High	Master Protein	Q9C0B7	Transport and Golgi organization protein 6 homolog OS=Homo sapiens OX=9606 GN=TANGO6 PE=1 SV=2	4	4	12	4	120.7	TANGO6	100567		100567	5.02468e+06	4.68264e+06	4.85366e+06	3.24775e+06	3.70098e+06	3.47436e+06	4.75309e+06	3.3738e+06
High	Master Protein	Q9BQ95	Evolutionarily conserved signaling intermediate in Toll pathway, mitochondrial OS=Homo sapiens OX=9606 GN=ECSIT PE=1 SV=1	21	5	12	5	49.1	ECSIT	71050.8	251636	161344	7.03103e+06	5.39526e+06	6.21315e+06	2.87041e+06	4.25658e+06	3.5635e+06	6.0518e+06	3.40215e+06
High	Master Protein	Q6GPH6	Inositol 1,4,5-trisphosphate receptor-interacting protein-like 1 OS=Homo sapiens OX=9606 GN=ITPRIPL1 PE=1 SV=1	11	4	12	4	63.4	ITPRIPL1			#DIV/0!	3.31675e+06	2.70558e+06	3.01116e+06	3.75873e+06	3.57122e+06	3.66497e+06	#DIV/0!	#DIV/0!
High	Master Protein	Q16718	NADH dehydrogenase [ubiquinone] 1 alpha subcomplex subunit 5 OS=Homo sapiens OX=9606 GN=NDUFA5 PE=1 SV=3	40	3	11	3	13.5	NDUFA5		106753	106753	7.39917e+06	3.51663e+06	5.4579e+06	3.83428e+06	4.33635e+06	4.08531e+06	5.35114e+06	3.97856e+06
High	Master Protein	P18583	Protein SON OS=Homo sapiens OX=9606 GN=SON PE=1 SV=4	3	4	11	4	263.7	SON		97467.2	97467.2	5.99504e+06	5.75916e+06	5.8771e+06	5.56627e+06	4.07421e+06	4.82024e+06	5.77963e+06	4.72278e+06
High	Master Protein	Q969Y2	tRNA modification GTPase GTPBP3, mitochondrial OS=Homo sapiens OX=9606 GN=GTPBP3 PE=1 SV=2	16	5	11	5	52	GTPBP3		72096.3	72096.3	2.20525e+06	1.60759e+06	1.90642e+06	1.41468e+06	1.48623e+06	1.45046e+06	1.83433e+06	1.37836e+06
High	Master Protein	Q02952	A-kinase anchor protein 12 OS=Homo sapiens OX=9606 GN=AKAP12 PE=1 SV=4	2	3	11	3	191.4	AKAP12	1.06651e+06	1.12607e+06	1.09629e+06	1.57326e+06	1.3344e+06	1.45383e+06	659916	620177	640046	357538	-456246
High	Master Protein	Q96II8	DISP complex protein LRCH3 OS=Homo sapiens OX=9606 GN=LRCH3 PE=1 SV=2	5	4	11	4	86	LRCH3	720343	225765	473054	750781	298300	524540	242318	334662	288490	51486.5	-184564
High	Master Protein	O15160	DNA-directed RNA polymerases I and III subunit RPAC1 OS=Homo sapiens OX=9606 GN=POLR1C PE=1 SV=1	17	4	11	4	39.2	POLR1C	813779	678293	746036	2.3661e+06	2.1534e+06	2.25975e+06	2.52983e+06	2.98959e+06	2.75971e+06	1.51372e+06	2.01368e+06
High	Master Protein	Q9BQ70	Ribosome quality control complex subunit TCF25 OS=Homo sapiens OX=9606 GN=TCF25 PE=1 SV=1	9	5	11	5	76.6	TCF25	1.44141e+06	428242	934825	9.66208e+06	10001511	9.83179e+06	8.26993e+06	8149616	8.20977e+06	8.89697e+06	7.27495e+06
High	Master Protein	P46783	Small ribosomal subunit protein eS10 OS=Homo sapiens OX=9606 GN=RPS10 PE=1 SV=1	30	5	11	5	18.9	RPS10	1.44931e+06	1.387e+06	1.41816e+06	2.37002e+07	1.36603e+07	1.86802e+07	2.11527e+07	1.406e+07	1.76064e+07	1.72621e+07	1.61882e+07
High	Master Protein	Q9ULT8	E3 ubiquitin-protein ligase HECTD1 OS=Homo sapiens OX=9606 GN=HECTD1 PE=1 SV=4	4	7	11	7	289.2	HECTD1	2.96039e+06	2.55152e+06	2.75595e+06	7.20713e+06	3.27211e+06	5.23962e+06	4.33057e+06	2.61026e+06	3.47041e+06	2.48367e+06	714461
High	Master Protein	Q13433	Zinc transporter ZIP6 OS=Homo sapiens OX=9606 GN=SLC39A6 PE=1 SV=3	7	4	11	4	85	SLC39A6			#DIV/0!	1.05131e+07	8.46037e+06	9.48674e+06	8.69819e+06	7.59364e+06	8.14592e+06	#DIV/0!	#DIV/0!
High	Master Protein	Q7RTS9	Dymeclin OS=Homo sapiens OX=9606 GN=DYM PE=1 SV=1	7	5	11	5	75.9	DYM	84973.1		84973.1	1.89596e+07	1.43317e+07	1.66456e+07	1.01192e+07	11553588	1.08364e+07	1.65607e+07	1.07514e+07
High	Master Protein	Q08J23	RNA cytosine C(5)-methyltransferase NSUN2 OS=Homo sapiens OX=9606 GN=NSUN2 PE=1 SV=2	10	6	11	6	86.4	NSUN2	1.65769e+06	1.40269e+06	1.53019e+06	7.17829e+06	5.4261e+06	6.30219e+06	4.78839e+06	5.98389e+06	5.38614e+06	4.772e+06	3.85595e+06
High	Master Protein	P42771	Cyclin-dependent kinase inhibitor 2A OS=Homo sapiens OX=9606 GN=CDKN2A PE=1 SV=2	19	2	11	2	16.5	CDKN2A	2.1928e+06	408575	1.30069e+06	3.9299e+06	2.20144e+06	3.06567e+06	2.26256e+06	2.77807e+06	2.52032e+06	1.76498e+06	1219627
High	Master Protein	Q13595	Transformer-2 protein homolog alpha OS=Homo sapiens OX=9606 GN=TRA2A PE=1 SV=1	12	3	11	3	32.7	TRA2A	1.12542e+06	1.15324e+06	1.13933e+06	6.23284e+06	4.54761e+06	5.39022e+06	3.5734e+06	5.0818e+06	4.3276e+06	4.25089e+06	3.18827e+06
High	Master Protein	O95757	Heat shock 70 kDa protein 4L OS=Homo sapiens OX=9606 GN=HSPA4L PE=1 SV=3	7	4	11	2	94.5	HSPA4L	293447	299582	296515	1.94414e+06	1.5831e+06	1.76362e+06	1.60531e+06	1.81772e+06	1.71152e+06	1.4671e+06	1.415e+06
High	Master Protein	Q99956	Dual specificity protein phosphatase 9 OS=Homo sapiens OX=9606 GN=DUSP9 PE=1 SV=1	19	4	11	4	41.8	DUSP9	450514	79142.2	264828	3.56423e+06	2.11247e+06	2.83835e+06	1.83341e+06	2.38919e+06	2.1113e+06	2.57352e+06	1.84647e+06
High	Master Protein	Q6NSI4	RPA-related protein RADX OS=Homo sapiens OX=9606 GN=RADX PE=1 SV=2	6	5	11	5	97.5	RADX	397026	570182	483604	6.02543e+06	5.87345e+06	5.94944e+06	4.64538e+06	4.61831e+06	4.63185e+06	5.46583e+06	4.14824e+06
High	Master Protein	Q9Y3S1	Serine/threonine-protein kinase WNK2 OS=Homo sapiens OX=9606 GN=WNK2 PE=1 SV=4	2	5	11	2	242.5	WNK2	668662	545975	607319	141968	240985	191476	76240.4	563203	319722	-415842	-287597
High	Master Protein	O75190	DnaJ homolog subfamily B member 6 OS=Homo sapiens OX=9606 GN=DNAJB6 PE=1 SV=2	23	6	11	6	36.1	DNAJB6	382430	243231	312831	1.33074e+07	7.25622e+06	1.02818e+07	5.85907e+06	9.94818e+06	7.90363e+06	9.96897e+06	7.5908e+06
High	Master Protein	O95299	NADH dehydrogenase [ubiquinone] 1 alpha subcomplex subunit 10, mitochondrial OS=Homo sapiens OX=9606 GN=NDUFA10 PE=1 SV=1	27	6	11	6	40.7	NDUFA10	1.5748e+06	1.24229e+06	1.40854e+06	2.48725e+07	1.81861e+07	2.15293e+07	1.57911e+07	2.20887e+07	1.89399e+07	2.01207e+07	1.75313e+07
High	Master Protein	Q02543	Large ribosomal subunit protein eL20 OS=Homo sapiens OX=9606 GN=RPL18A PE=1 SV=2	19	4	11	4	20.7	RPL18A	3.4236e+06	2.82516e+06	3.12438e+06	2.16875e+07	1.98163e+07	2.07519e+07	1.53169e+07	1.77344e+07	1.65257e+07	1.76275e+07	1.34013e+07
High	Master Protein	Q8NG27	E3 ubiquitin-protein ligase Praja-1 OS=Homo sapiens OX=9606 GN=PJA1 PE=1 SV=2	16	7	11	5	71	PJA1	191918	38557	115238	6.06035e+06	7.35836e+06	6.70936e+06	6.09022e+06	6.27618e+06	6.1832e+06	6.59412e+06	6.06796e+06
High	Master Protein	O94901	SUN domain-containing protein 1 OS=Homo sapiens OX=9606 GN=SUN1 PE=1 SV=4	7	4	11	3	87.1	SUN1	131572	156986	144279	1.66436e+06	1.07631e+06	1.37033e+06	734125	576903	655514	1.22605e+06	511235
High	Master Protein	Q96HY6	DDRGK domain-containing protein 1 OS=Homo sapiens OX=9606 GN=DDRGK1 PE=1 SV=2	20	4	11	4	35.6	DDRGK1			#DIV/0!	5.07219e+06	3.82897e+06	4.45058e+06	3769999	3.13491e+06	3.45246e+06	#DIV/0!	#DIV/0!
High	Master Protein	P67936	Tropomyosin alpha-4 chain OS=Homo sapiens OX=9606 GN=TPM4 PE=1 SV=3	19	5	11	1	28.5	TPM4			#DIV/0!	1554377		1554377			#DIV/0!	#DIV/0!	#DIV/0!
High	Master Protein	Q9UH62	Armadillo repeat-containing X-linked protein 3 OS=Homo sapiens OX=9606 GN=ARMCX3 PE=1 SV=1	13	4	11	4	42.5	ARMCX3	619248	328981	474114	8383041	6.30411e+06	7.34358e+06	5.66644e+06	6.46912e+06	6067782	6.86946e+06	5.59367e+06
High	Master Protein	Q8NFQ8	Torsin-1A-interacting protein 2 OS=Homo sapiens OX=9606 GN=TOR1AIP2 PE=1 SV=1	12	3	11	3	51.2	TOR1AIP2	219463	199729	209596	7.43166e+06	5.13562e+06	6.28364e+06	4.49557e+06	5.06956e+06	4.78256e+06	6.07405e+06	4.57297e+06
High	Master Protein	Q9Y2G8	DnaJ homolog subfamily C member 16 OS=Homo sapiens OX=9606 GN=DNAJC16 PE=1 SV=3	13	6	11	6	90.5	DNAJC16			#DIV/0!	8.18004e+06	6.63349e+06	7.40676e+06	4.74994e+06	7.03498e+06	5.89246e+06	#DIV/0!	#DIV/0!
High	Master Protein	P61353	Large ribosomal subunit protein eL27 OS=Homo sapiens OX=9606 GN=RPL27 PE=1 SV=2	36	4	11	4	15.8	RPL27	3968727	3.20761e+06	3.58817e+06	25537124	1.88946e+07	2.22159e+07	1.65131e+07	1.52645e+07	1.58888e+07	1.86277e+07	1.23006e+07
High	Master Protein	Q9UGP8	Translocation protein SEC63 homolog OS=Homo sapiens OX=9606 GN=SEC63 PE=1 SV=2	7	4	11	4	87.9	SEC63	288969	185815	237392	5.54776e+06	8.76279e+06	7.15527e+06	7.42545e+06	6.73239e+06	7078920	6.91788e+06	6.84153e+06
High	Master Protein	Q7Z4H3	5'-deoxynucleotidase HDDC2 OS=Homo sapiens OX=9606 GN=HDDC2 PE=1 SV=1	24	4	11	4	23.4	HDDC2	507257	239062	373159	6.0024e+06	2.15709e+06	4.07975e+06	2.99863e+06	4.05e+06	3.52432e+06	3.70659e+06	3.15116e+06
High	Master Protein	Q6IAA8	Ragulator complex protein LAMTOR1 OS=Homo sapiens OX=9606 GN=LAMTOR1 PE=1 SV=2	43	4	11	4	17.7	LAMTOR1	610101	356564	483333	1.03396e+07	7.02103e+06	8.6803e+06	6313573	6.14043e+06	6.227e+06	8.19697e+06	5.74367e+06
High	Master Protein	P17858	ATP-dependent 6-phosphofructokinase, liver type OS=Homo sapiens OX=9606 GN=PFKL PE=1 SV=6	9	5	11	4	85	PFKL	1.38818e+06	1.47108e+06	1.42963e+06	6.54121e+06	5.66592e+06	6.10356e+06	4.70965e+06	5.43373e+06	5.07169e+06	4.67393e+06	3.64206e+06
High	Master Protein	P18621	Large ribosomal subunit protein uL22 OS=Homo sapiens OX=9606 GN=RPL17 PE=1 SV=3	20	4	11	4	21.4	RPL17	2.54569e+06	1.92034e+06	2.23301e+06	2.20224e+07	1.14732e+07	1.67478e+07	1.0144e+07	1.67137e+07	1.34288e+07	1.45148e+07	1.11958e+07
High	Master Protein	Q8WUA4	General transcription factor 3C polypeptide 2 OS=Homo sapiens OX=9606 GN=GTF3C2 PE=1 SV=2	4	4	11	4	100.6	GTF3C2	534139	448829	491484	6.4644e+06	3.99106e+06	5.22773e+06	3.87631e+06	3.93864e+06	3.90747e+06	4.73625e+06	3.41599e+06
High	Master Protein	Q16352	Alpha-internexin OS=Homo sapiens OX=9606 GN=INA PE=1 SV=2	8	4	11	3	55.4	INA	655042	411633	533337	2.88866e+06	1.36137e+06	2.12501e+06	768143	969764	868953	1.59168e+06	335616
High	Master Protein	Q96SQ9	Cytochrome P450 2S1 OS=Homo sapiens OX=9606 GN=CYP2S1 PE=1 SV=2	9	4	11	4	55.8	CYP2S1	58010.7	63514.3	60762.5	2.61324e+06	2.24427e+06	2.42875e+06	1.9618e+06	2.21507e+06	2.08844e+06	2.36799e+06	2.02767e+06
High	Master Protein	O00469	Procollagen-lysine,2-oxoglutarate 5-dioxygenase 2 OS=Homo sapiens OX=9606 GN=PLOD2 PE=1 SV=2	5	3	11	3	84.6	PLOD2	465477	262439	363958	3544660	2.92166e+06	3.23316e+06	2.30325e+06	2.55704e+06	2.43015e+06	2.8692e+06	2.06619e+06
High	Master Protein	P26368	Splicing factor U2AF 65 kDa subunit OS=Homo sapiens OX=9606 GN=U2AF2 PE=1 SV=4	16	3	11	3	53.5	U2AF2	985487	657788	821637	7.9954e+06	8.76297e+06	8.37918e+06	8.17545e+06	7.21921e+06	7.69733e+06	7.55755e+06	6.87569e+06
High	Master Protein	P62993	Growth factor receptor-bound protein 2 OS=Homo sapiens OX=9606 GN=GRB2 PE=1 SV=1	17	3	11	3	25.2	GRB2	1.35091e+06	286195	818551	8.10293e+06	7.93634e+06	8.01964e+06	5.98542e+06	7.54324e+06	6.76433e+06	7.20109e+06	5.94578e+06
High	Master Protein	Q9BTX1	Nucleoporin NDC1 OS=Homo sapiens OX=9606 GN=NDC1 PE=1 SV=2	7	3	11	3	76.3	NDC1			#DIV/0!	7.20486e+06	5.68395e+06	6.44441e+06	5.65605e+06	4.63081e+06	5.14343e+06	#DIV/0!	#DIV/0!
High	Master Protein	Q14103	Heterogeneous nuclear ribonucleoprotein D0 OS=Homo sapiens OX=9606 GN=HNRNPD PE=1 SV=1	17	4	11	4	38.4	HNRNPD	307959	180475	244217	1.60374e+06	838396	1.22107e+06	691368	821289	756328	976852	512111
High	Master Protein	Q14254	Flotillin-2 OS=Homo sapiens OX=9606 GN=FLOT2 PE=1 SV=2	17	6	11	6	47	FLOT2	773346	849558	811452	3.11333e+06	4.60301e+06	3.85817e+06	2.05945e+06	1.16077e+06	1.61011e+06	3.04672e+06	798660
High	Master Protein	Q07955	Serine/arginine-rich splicing factor 1 OS=Homo sapiens OX=9606 GN=SRSF1 PE=1 SV=2	21	5	11	5	27.7	SRSF1	3.37011e+06	2.43451e+06	2.90231e+06	1.31185e+07	8.40106e+06	1.07598e+07	6.80125e+06	1.18304e+07	9.31582e+06	7.85745e+06	6.41351e+06
High	Master Protein	Q9UGJ1	Gamma-tubulin complex component 4 OS=Homo sapiens OX=9606 GN=TUBGCP4 PE=1 SV=1	12	5	11	5	76	TUBGCP4		340740	340740	10297723	1.17104e+07	1.10041e+07	1.49995e+07	1.11965e+07	1.3098e+07	1.06633e+07	1.27573e+07
High	Master Protein	P31930	Cytochrome b-c1 complex subunit 1, mitochondrial OS=Homo sapiens OX=9606 GN=UQCRC1 PE=1 SV=3	20	7	11	7	52.6	UQCRC1	381695	139158	260426	4.6572e+06	3.18424e+06	3.92072e+06	2.10473e+06	2.49846e+06	2.30159e+06	3.66029e+06	2.04117e+06
High	Master Protein	Q8NBQ5	Estradiol 17-beta-dehydrogenase 11 OS=Homo sapiens OX=9606 GN=HSD17B11 PE=1 SV=4	14	3	11	3	32.9	HSD17B11			#DIV/0!	2.94153e+06	2.41212e+06	2.67682e+06	2.73343e+06	2.97916e+06	2.8563e+06	#DIV/0!	#DIV/0!
High	Master Protein	P35250	Replication factor C subunit 2 OS=Homo sapiens OX=9606 GN=RFC2 PE=1 SV=3	13	4	11	4	39.1	RFC2	885612	1.26023e+06	1.07292e+06	1.39433e+07	1.01557e+07	1.20495e+07	7.00157e+06	1.12543e+07	9.12793e+06	1.09766e+07	8.055e+06
High	Master Protein	O00567	Nucleolar protein 56 OS=Homo sapiens OX=9606 GN=NOP56 PE=1 SV=4	11	5	11	5	66	NOP56	494209	607657	550933	6.62248e+06	5.76698e+06	6.19473e+06	5.1013e+06	4.95631e+06	5.02881e+06	5.6438e+06	4.47787e+06
High	Master Protein	Q8WVB6	Chromosome transmission fidelity protein 18 homolog OS=Homo sapiens OX=9606 GN=CHTF18 PE=1 SV=1	7	5	11	5	107.3	CHTF18	427540	259844	343692	4.17355e+06	3.60859e+06	3.89107e+06	2.68409e+06	3.5789e+06	3.13149e+06	3.54738e+06	2.7878e+06
High	Master Protein	O95163	Elongator complex protein 1 OS=Homo sapiens OX=9606 GN=ELP1 PE=1 SV=3	4	5	11	5	150.2	ELP1	109792	308277	209035	1.24298e+06	1.13858e+06	1.19078e+06	1.39791e+06	1.70899e+06	1.55345e+06	981743	1.34442e+06
High	Master Protein	Q96IJ6	Mannose-1-phosphate guanyltransferase alpha OS=Homo sapiens OX=9606 GN=GMPPA PE=1 SV=1	13	4	11	4	46.3	GMPPA	803111	407599	605355	3.72291e+06	3.22626e+06	3.47459e+06	1.73271e+06	2.72075e+06	2.22673e+06	2.86923e+06	1.62138e+06
High	Master Protein	Q14558	Phosphoribosyl pyrophosphate synthase-associated protein 1 OS=Homo sapiens OX=9606 GN=PRPSAP1 PE=1 SV=2	16	4	11	3	39.4	PRPSAP1	173648	220697	197172	7.46462e+06	4.07497e+06	5.76979e+06	4.04824e+06	4.44019e+06	4.24421e+06	5.57262e+06	4.04704e+06
High	Master Protein	Q9BTY7	Protein HGH1 homolog OS=Homo sapiens OX=9606 GN=HGH1 PE=1 SV=1	11	3	11	3	42.1	HGH1	921554	810385	865970	3.23877e+06	3517563	3.37817e+06	1.10328e+06	3.21686e+06	2.16007e+06	2.5122e+06	1.2941e+06
High	Master Protein	O60256	Phosphoribosyl pyrophosphate synthase-associated protein 2 OS=Homo sapiens OX=9606 GN=PRPSAP2 PE=1 SV=1	13	3	11	2	40.9	PRPSAP2	415782	181313	298547	907949	562021	734985	1.06713e+06	1.41749e+06	1.24231e+06	436438	943762
High	Master Protein	Q9C0E8	Endoplasmic reticulum junction formation protein lunapark OS=Homo sapiens OX=9606 GN=LNPK PE=1 SV=2	11	4	11	4	47.7	LNPK	652348	246286	449317	1.22432e+07	9.82003e+06	1.10316e+07	7.29545e+06	1.01909e+07	8.74318e+06	1.05823e+07	8.29386e+06
High	Master Protein	Q9Y305	Acyl-coenzyme A thioesterase 9, mitochondrial OS=Homo sapiens OX=9606 GN=ACOT9 PE=1 SV=2	13	5	11	5	49.9	ACOT9	1.07272e+06	478204	775460	4.89362e+06	4.82119e+06	4.85741e+06	3.40033e+06	3.7299e+06	3.56512e+06	4.08195e+06	2.78966e+06
High	Master Protein	P05455	Lupus La protein OS=Homo sapiens OX=9606 GN=SSB PE=1 SV=2	9	3	11	3	46.8	SSB	505040	1020758	762899	8.09079e+06	7.44386e+06	7.76732e+06	3.792e+06	5.50086e+06	4.64643e+06	7.00443e+06	3.88353e+06
High	Master Protein	Q9H9P8	L-2-hydroxyglutarate dehydrogenase, mitochondrial OS=Homo sapiens OX=9606 GN=L2HGDH PE=1 SV=3	11	3	11	3	50.3	L2HGDH			#DIV/0!	3.63628e+06	2.88446e+06	3.26037e+06	2.1199e+06	2.73294e+06	2.42642e+06	#DIV/0!	#DIV/0!
High	Master Protein	Q9Y3D9	Small ribosomal subunit protein mS23 OS=Homo sapiens OX=9606 GN=MRPS23 PE=1 SV=2	16	3	11	3	21.8	MRPS23	928839	944821	936830	7.2016e+06	3.80435e+06	5502976	3.86678e+06	5.38916e+06	4.62797e+06	4.56615e+06	3.69114e+06
High	Master Protein	O60287	Nucleolar pre-ribosomal-associated protein 1 OS=Homo sapiens OX=9606 GN=URB1 PE=1 SV=4	2	5	11	5	254.2	URB1		159830	159830	5.47357e+06	4.57362e+06	5.0236e+06	3005847	2.81043e+06	2.90814e+06	4.86377e+06	2.74831e+06
High	Master Protein	Q15165	Serum paraoxonase/arylesterase 2 OS=Homo sapiens OX=9606 GN=PON2 PE=1 SV=4	12	3	11	3	39.4	PON2			#DIV/0!	15244342	1.26303e+07	1.39373e+07	12641240	1.23477e+07	1.24945e+07	#DIV/0!	#DIV/0!
High	Master Protein	Q9Y6Y8	SEC23-interacting protein OS=Homo sapiens OX=9606 GN=SEC23IP PE=1 SV=1	7	5	11	5	111	SEC23IP	1.11046e+06	136233	623349	4.70093e+06	1.43259e+06	3.06676e+06	2.79517e+06	2.63013e+06	2.71265e+06	2.44341e+06	2.0893e+06
High	Master Protein	P09651	Heterogeneous nuclear ribonucleoprotein A1 OS=Homo sapiens OX=9606 GN=HNRNPA1 PE=1 SV=5	16	4	11	4	38.7	HNRNPA1	1.92847e+06	618584	1.27353e+06	5.58091e+06	4.11067e+06	4.84579e+06	1.44063e+06	2663922	2.05228e+06	3.57226e+06	778747
High	Master Protein	P82930	Small ribosomal subunit protein mS34 OS=Homo sapiens OX=9606 GN=MRPS34 PE=1 SV=2	11	4	11	4	25.6	MRPS34	371268	1.46486e+06	918063	1.08131e+07	7.46894e+06	9.14101e+06	5.49078e+06	9.73005e+06	7.61042e+06	8.22294e+06	6.69235e+06
High	Master Protein	P22087	rRNA 2'-O-methyltransferase fibrillarin OS=Homo sapiens OX=9606 GN=FBL PE=1 SV=2	11	3	11	3	33.8	FBL	1.37674e+06	885580	1.13116e+06	6.7529e+06	5.6177e+06	6.1853e+06	4.29925e+06	6.44518e+06	5.37221e+06	5.05414e+06	4.24105e+06
High	Master Protein	O14776	Transcription elongation regulator 1 OS=Homo sapiens OX=9606 GN=TCERG1 PE=1 SV=2	4	5	11	5	123.8	TCERG1	1.32501e+06	1.17715e+06	1.25108e+06	1.39439e+07	8.84852e+06	11396185	8.68832e+06	8.97607e+06	8.83219e+06	1.01451e+07	7.58111e+06
High	Master Protein	Q96S66	Chloride channel CLIC-like protein 1 OS=Homo sapiens OX=9606 GN=CLCC1 PE=1 SV=1	12	4	10	4	62	CLCC1			#DIV/0!	2.21957e+06	1.19385e+06	1.70671e+06	1.18305e+06	922618	1.05283e+06	#DIV/0!	#DIV/0!
High	Master Protein	O00116	Alkyldihydroxyacetonephosphate synthase, peroxisomal OS=Homo sapiens OX=9606 GN=AGPS PE=1 SV=1	11	5	10	5	72.9	AGPS	278688	385738	332213	5.12798e+06	4.47469e+06	4.80133e+06	3.40357e+06	3.97205e+06	3.68781e+06	4.46912e+06	3.35559e+06
High	Master Protein	O14641	Segment polarity protein dishevelled homolog DVL-2 OS=Homo sapiens OX=9606 GN=DVL2 PE=1 SV=1	7	4	10	4	78.9	DVL2	479377	179121	329249	2.65251e+06	1.86776e+06	2.26013e+06	1.42496e+06	1.68829e+06	1.55663e+06	1.93089e+06	1.22738e+06
High	Master Protein	O95292	Vesicle-associated membrane protein-associated protein B/C OS=Homo sapiens OX=9606 GN=VAPB PE=1 SV=3	18	4	10	3	27.2	VAPB	970892	1.08474e+06	1.02782e+06	1.17576e+07	6.47326e+06	9115405	4517679	8208206	6.36294e+06	8.08759e+06	5.33513e+06
High	Master Protein	Q99871	HAUS augmin-like complex subunit 7 OS=Homo sapiens OX=9606 GN=HAUS7 PE=1 SV=4	19	5	10	5	39.8	HAUS7	1.13177e+06	998905	1.06534e+06	3.60967e+06	3.2124e+06	3.41103e+06	2.56597e+06	2.79548e+06	2.68073e+06	2.3457e+06	1.61539e+06
High	Master Protein	Q68DH5	G-protein coupled receptor-associated protein LMBRD2 OS=Homo sapiens OX=9606 GN=LMBRD2 PE=1 SV=1	10	4	10	4	81.1	LMBRD2			#DIV/0!	5.91766e+06	3.9341e+06	4.92588e+06	2.59988e+06	3.34766e+06	2.97377e+06	#DIV/0!	#DIV/0!
High	Master Protein	P02768	Albumin OS=Homo sapiens OX=9606 GN=ALB PE=1 SV=2	5	3	10	3	69.3	ALB	4.74792e+06	3.65364e+06	4.20078e+06	3.14175e+06	4.37403e+06	3.75789e+06	3.09456e+06	5497829	4.2962e+06	-442891	95414.3
High	Master Protein	P26640	Valine--tRNA ligase OS=Homo sapiens OX=9606 GN=VARS1 PE=1 SV=4	5	5	10	5	140.4	VARS1	1.45934e+06	1.49446e+06	1.4769e+06	6.56696e+06	5.24547e+06	5.90621e+06	3.82685e+06	4.7879e+06	4.30737e+06	4.42931e+06	2.83047e+06
High	Master Protein	Q13637	Ras-related protein Rab-32 OS=Homo sapiens OX=9606 GN=RAB32 PE=1 SV=3	18	4	10	3	25	RAB32	280502	234670	257586	8.60732e+06	5.75786e+06	7.18259e+06	5.3029e+06	7.23565e+06	6.26928e+06	6.92501e+06	6.01169e+06
High	Master Protein	P42224	Signal transducer and activator of transcription 1-alpha/beta OS=Homo sapiens OX=9606 GN=STAT1 PE=1 SV=2	6	3	10	3	87.3	STAT1	2.01055e+06	900608	1.45558e+06	4.83772e+06	3.93876e+06	4.38824e+06	3.14632e+06	3.17562e+06	3.16097e+06	2.93266e+06	1.70539e+06
High	Master Protein	P78318	Immunoglobulin-binding protein 1 OS=Homo sapiens OX=9606 GN=IGBP1 PE=1 SV=1	18	4	10	4	39.2	IGBP1	513456	449915	481685	4.11952e+06	3.42849e+06	3.77401e+06	2.46324e+06	3.61177e+06	3.03751e+06	3.29232e+06	2.55582e+06
High	Master Protein	P11802	Cyclin-dependent kinase 4 OS=Homo sapiens OX=9606 GN=CDK4 PE=1 SV=2	17	4	10	3	33.7	CDK4	241051	112131	176591	2.28835e+06	2.2166e+06	2.25247e+06	1.66444e+06	2.8338e+06	2.24912e+06	2.07588e+06	2.07253e+06
High	Master Protein	Q8IWX8	Calcium homeostasis endoplasmic reticulum protein OS=Homo sapiens OX=9606 GN=CHERP PE=1 SV=3	5	4	10	4	103.6	CHERP			#DIV/0!	1.45247e+06	1.01141e+06	1.23194e+06	690415	827623	759019	#DIV/0!	#DIV/0!
High	Master Protein	P32322	Pyrroline-5-carboxylate reductase 1, mitochondrial OS=Homo sapiens OX=9606 GN=PYCR1 PE=1 SV=2	8	2	10	1	33.3	PYCR1	595183	437470	516327	3700212	2.85465e+06	3.27743e+06	1.85843e+06	2563137	2.21078e+06	2.7611e+06	1.69445e+06
High	Master Protein	P0CG08	Golgi pH regulator B OS=Homo sapiens OX=9606 GN=GPR89B PE=1 SV=1	8	4	10	4	52.9	GPR89B	967843	169320	568581	1.14164e+07	8.5412e+06	9.97881e+06	6.72429e+06	6.49699e+06	6.61064e+06	9.41023e+06	6.04206e+06
High	Master Protein	Q9BVI4	Nucleolar complex protein 4 homolog OS=Homo sapiens OX=9606 GN=NOC4L PE=1 SV=1	7	3	10	3	58.4	NOC4L	54802.7	150878	102840	2580364	2.30858e+06	2.44447e+06	1.80486e+06	2.21777e+06	2.01132e+06	2.34163e+06	1.90848e+06
High	Master Protein	Q9Y2U8	Inner nuclear membrane protein Man1 OS=Homo sapiens OX=9606 GN=LEMD3 PE=1 SV=2	9	5	10	5	99.9	LEMD3	308245		308245	2.08327e+06	2.03552e+06	2.05939e+06	1.581e+06	1.8781e+06	1.72955e+06	1.75115e+06	1.4213e+06
High	Master Protein	Q96JB2	Conserved oligomeric Golgi complex subunit 3 OS=Homo sapiens OX=9606 GN=COG3 PE=1 SV=3	9	6	10	6	94	COG3		164801	164801	8.50737e+06	6.25009e+06	7.37873e+06	3.64906e+06	4.57579e+06	4.11242e+06	7.21393e+06	3.94762e+06
High	Master Protein	Q9NP58	ATP-binding cassette sub-family B member 6 OS=Homo sapiens OX=9606 GN=ABCB6 PE=1 SV=1	11	5	10	5	93.8	ABCB6			#DIV/0!	7.43799e+06	6.92976e+06	7.18387e+06	5.38677e+06	4.3818e+06	4.88429e+06	#DIV/0!	#DIV/0!
High	Master Protein	P61163	Alpha-centractin OS=Homo sapiens OX=9606 GN=ACTR1A PE=1 SV=1	26	7	10	3	42.6	ACTR1A	1.37928e+06	934871	1.15708e+06	10993160	8.21928e+06	9.60622e+06	5.70919e+06	7.73919e+06	6.72419e+06	8.44915e+06	5.56712e+06
High	Master Protein	O15287	Fanconi anemia group G protein OS=Homo sapiens OX=9606 GN=FANCG PE=1 SV=1	9	5	10	5	68.5	FANCG			#DIV/0!	4.23567e+06	3.36598e+06	3.80082e+06	2.91771e+06	2.711e+06	2.81436e+06	#DIV/0!	#DIV/0!
High	Master Protein	P13489	Ribonuclease inhibitor OS=Homo sapiens OX=9606 GN=RNH1 PE=1 SV=2	9	3	10	3	49.9	RNH1	1.22095e+06	1.05767e+06	1.13931e+06	1.00815e+07	6.69706e+06	8.38929e+06	5417850	6.91172e+06	6.16478e+06	7.24998e+06	5.02547e+06
High	Master Protein	Q9Y520	Protein PRRC2C OS=Homo sapiens OX=9606 GN=PRRC2C PE=1 SV=4	6	7	10	7	316.7	PRRC2C	6.3134e+06	3.99741e+06	5.15541e+06	2.39084e+06	2.30271e+06	2.34677e+06	1.16244e+06	1.25639e+06	1.20942e+06	-2.80863e+06	-3.94599e+06
High	Master Protein	Q9H3G5	Probable serine carboxypeptidase CPVL OS=Homo sapiens OX=9606 GN=CPVL PE=1 SV=2	11	4	10	4	54.1	CPVL	3.93184e+06	1.8404e+06	2.88612e+06	1.07269e+07	8.3877e+06	9.55728e+06	6.14719e+06	7.24523e+06	6.69621e+06	6.67116e+06	3.81009e+06
High	Master Protein	P40429	Large ribosomal subunit protein uL13 OS=Homo sapiens OX=9606 GN=RPL13A PE=1 SV=2	13	3	10	3	23.6	RPL13A	1.04563e+06	1.13978e+06	1.09271e+06	8815598	5.61855e+06	7.21707e+06	6.01518e+06	9.20012e+06	7607651	6.12437e+06	6.51494e+06
High	Master Protein	P49721	Proteasome subunit beta type-2 OS=Homo sapiens OX=9606 GN=PSMB2 PE=1 SV=1	18	3	10	3	22.8	PSMB2	200122		200122	1.62049e+07	1.43415e+07	1.52732e+07	1.64156e+07	1.38639e+07	1.51398e+07	1.50731e+07	1.49396e+07
High	Master Protein	Q00526	Cyclin-dependent kinase 3 OS=Homo sapiens OX=9606 GN=CDK3 PE=1 SV=1	11	3	10	1	35	CDK3		362745	362745	1.65218e+06	1.07862e+06	1.3654e+06	1.24371e+06	1.91016e+06	1.57694e+06	1.00266e+06	1.21419e+06
High	Master Protein	O75616	GTPase Era, mitochondrial OS=Homo sapiens OX=9606 GN=ERAL1 PE=1 SV=2	8	3	10	3	48.3	ERAL1	1.26719e+06	897582	1.08239e+06	1.34417e+07	1.02569e+07	1.18493e+07	8.48591e+06	1.01307e+07	9.3083e+06	1.07669e+07	8.22591e+06
High	Master Protein	Q9BQT8	Mitochondrial 2-oxodicarboxylate carrier OS=Homo sapiens OX=9606 GN=SLC25A21 PE=1 SV=1	12	4	10	4	33.3	SLC25A21			#DIV/0!	1.0164e+07	7271414	8.71768e+06	6.54927e+06	8.39246e+06	7.47086e+06	#DIV/0!	#DIV/0!
High	Master Protein	Q3MHD2	Protein LSM12 OS=Homo sapiens OX=9606 GN=LSM12 PE=1 SV=2	11	2	10	2	21.7	LSM12	3.34728e+06	2.35802e+06	2.85265e+06	4.85705e+06	3.33217e+06	4.09461e+06	3.16393e+06	4.56216e+06	3.86304e+06	1.24196e+06	1.01039e+06
High	Master Protein	O75828	Carbonyl reductase [NADPH] 3 OS=Homo sapiens OX=9606 GN=CBR3 PE=1 SV=3	10	2	10	2	30.8	CBR3	1.83844e+06	936604	1.38752e+06	4.15195e+06	2395035	3.27349e+06	1.94771e+06	3131515	2.53961e+06	1.88597e+06	1.15209e+06
High	Master Protein	O00400	Acetyl-coenzyme A transporter 1 OS=Homo sapiens OX=9606 GN=SLC33A1 PE=1 SV=1	11	5	10	5	60.9	SLC33A1			#DIV/0!	3.13862e+06	264695	1.70166e+06	1.77636e+06	296968	1.03667e+06	#DIV/0!	#DIV/0!
High	Master Protein	Q8NBJ5	Procollagen galactosyltransferase 1 OS=Homo sapiens OX=9606 GN=COLGALT1 PE=1 SV=1	8	4	10	4	71.6	COLGALT1	328379	275970	302175	3163796	4.09017e+06	3.62698e+06	3.97318e+06	3.89573e+06	3.93446e+06	3.32481e+06	3.63228e+06
High	Master Protein	Q70HW3	Mitochondrial S-adenosylmethionine carrier protein OS=Homo sapiens OX=9606 GN=SLC25A26 PE=1 SV=2	12	2	10	2	29.3	SLC25A26	119784	342342	231063	6.93586e+06	4.0102e+06	5.47303e+06	3694186	7.03608e+06	5.36514e+06	5.24197e+06	5.13407e+06
High	Master Protein	P28070	Proteasome subunit beta type-4 OS=Homo sapiens OX=9606 GN=PSMB4 PE=1 SV=4	12	2	10	2	29.2	PSMB4			#DIV/0!	6.71568e+06	3.88765e+06	5.30167e+06	3.11731e+06	4.41719e+06	3.76725e+06	#DIV/0!	#DIV/0!
High	Master Protein	Q7LGA3	Heparan sulfate 2-O-sulfotransferase 1 OS=Homo sapiens OX=9606 GN=HS2ST1 PE=1 SV=1	6	2	10	2	41.9	HS2ST1			#DIV/0!	1.45499e+07	1.15033e+07	1.30266e+07	8.71628e+06	1.16566e+07	1.01864e+07	#DIV/0!	#DIV/0!
High	Master Protein	Q5JTH9	RRP12-like protein OS=Homo sapiens OX=9606 GN=RRP12 PE=1 SV=2	5	5	10	5	143.6	RRP12			#DIV/0!	3.56319e+06	2.48149e+06	3.02234e+06	2.05619e+06	2.36929e+06	2.21274e+06	#DIV/0!	#DIV/0!
High	Master Protein	Q9BUN8	Derlin-1 OS=Homo sapiens OX=9606 GN=DERL1 PE=1 SV=1	13	3	10	3	28.8	DERL1			#DIV/0!	2.33065e+07	1.31825e+07	1.82445e+07	1.50123e+07	1.55598e+07	1.52861e+07	#DIV/0!	#DIV/0!
High	Master Protein	P53350	Serine/threonine-protein kinase PLK1 OS=Homo sapiens OX=9606 GN=PLK1 PE=1 SV=1	8	4	10	4	68.2	PLK1	1.67987e+06	1.29701e+06	1.48844e+06	7.27811e+06	4.86817e+06	6.07314e+06	3.71536e+06	3.70569e+06	3.71053e+06	4.5847e+06	2.22209e+06
High	Master Protein	Q9BYJ9	YTH domain-containing family protein 1 OS=Homo sapiens OX=9606 GN=YTHDF1 PE=1 SV=1	6	3	10	1	60.8	YTHDF1		227519	227519		720150	720150	779767	842910	811339	492631	583820
High	Master Protein	Q9H974	Queuine tRNA-ribosyltransferase accessory subunit 2 OS=Homo sapiens OX=9606 GN=QTRT2 PE=1 SV=1	13	4	10	4	46.7	QTRT2	102093	139772	120932	5.03771e+06	5780010	5.40886e+06	4570396	2.57036e+06	3.57038e+06	5.28793e+06	3.44945e+06
High	Master Protein	O75821	Eukaryotic translation initiation factor 3 subunit G OS=Homo sapiens OX=9606 GN=EIF3G PE=1 SV=2	13	4	10	4	35.6	EIF3G	3303735	1.40151e+06	2.35262e+06	574216	1.89771e+06	1.23596e+06	1.21846e+06	2.23569e+06	1.72707e+06	-1116660	-625548
High	Master Protein	O75419	Cell division control protein 45 homolog OS=Homo sapiens OX=9606 GN=CDC45 PE=1 SV=1	14	7	10	7	65.5	CDC45	346590		346590	1.0333e+07	9.20147e+06	9.76722e+06	8.37105e+06	1.0183e+07	9.27702e+06	9.42063e+06	8.93043e+06
High	Master Protein	O43747	AP-1 complex subunit gamma-1 OS=Homo sapiens OX=9606 GN=AP1G1 PE=1 SV=5	4	3	10	3	91.3	AP1G1	5.42138e+06	4.68668e+06	5.05403e+06	1.92967e+06	1.24214e+06	1.58591e+06	987614	1.17222e+06	1.07992e+06	-3.46812e+06	-3.97411e+06
High	Master Protein	Q96CP7	TLC domain-containing protein 1 OS=Homo sapiens OX=9606 GN=TLCD1 PE=1 SV=1	15	3	10	3	28.5	TLCD1			#DIV/0!	4.95447e+06	3.30493e+06	4.1297e+06	2.10243e+06	2.19074e+06	2.14659e+06	#DIV/0!	#DIV/0!
High	Master Protein	Q08379	Golgin subfamily A member 2 OS=Homo sapiens OX=9606 GN=GOLGA2 PE=1 SV=3	5	4	10	4	113	GOLGA2	2.32004e+06	2.39999e+06	2.36001e+06	1.68475e+06	1.55951e+06	1.62213e+06	854121	549833	701977	-737880	-1.65803e+06
High	Master Protein	Q14344	Guanine nucleotide-binding protein subunit alpha-13 OS=Homo sapiens OX=9606 GN=GNA13 PE=1 SV=2	5	2	10	1	44	GNA13		137217	137217	1.10784e+06	527728	817782	461857	489158	475508	680566	338291
High	Master Protein	P61020	Ras-related protein Rab-5B OS=Homo sapiens OX=9606 GN=RAB5B PE=1 SV=1	24	4	10	3	23.7	RAB5B		164729	164729	4.57382e+06	2.36088e+06	3.46735e+06	2.03962e+06	3.52447e+06	2.78205e+06	3.30262e+06	2.61732e+06
High	Master Protein	Q02790	Peptidyl-prolyl cis-trans isomerase FKBP4 OS=Homo sapiens OX=9606 GN=FKBP4 PE=1 SV=3	9	3	10	3	51.8	FKBP4	604840	368618	486729	958956	533110	746033	328779	599540	464160	259304	-22569.8
High	Master Protein	P09211	Glutathione S-transferase P OS=Homo sapiens OX=9606 GN=GSTP1 PE=1 SV=2	17	2	10	2	23.3	GSTP1	1.2074e+07	8611977	1.0343e+07	32289152	2.1357e+07	2.68231e+07	18082556	1.93161e+07	1.86994e+07	1.64801e+07	8.35638e+06
High	Master Protein	O75251	NADH dehydrogenase [ubiquinone] iron-sulfur protein 7, mitochondrial OS=Homo sapiens OX=9606 GN=NDUFS7 PE=1 SV=3	11	2	10	2	23.5	NDUFS7			#DIV/0!	6.599e+06	4.11763e+06	5.35831e+06	3.4391e+06	4407427	3.92326e+06	#DIV/0!	#DIV/0!
High	Master Protein	P30566	Adenylosuccinate lyase OS=Homo sapiens OX=9606 GN=ADSL PE=1 SV=2	4	2	10	2	54.9	ADSL	953715	596672	775193	2.32292e+06	1.47542e+06	1.89917e+06	1.17376e+06	1.47526e+06	1.32451e+06	1.12398e+06	549316
High	Master Protein	Q15021	Condensin complex subunit 1 OS=Homo sapiens OX=9606 GN=NCAPD2 PE=1 SV=3	4	5	10	5	157.1	NCAPD2	424618		424618	4.87867e+06	4.3365e+06	4.60758e+06	3.30816e+06	4.02211e+06	3.66513e+06	4.18297e+06	3.24051e+06
High	Master Protein	Q9H0W5	Coiled-coil domain-containing protein 8 OS=Homo sapiens OX=9606 GN=CCDC8 PE=1 SV=2	13	3	10	3	59.3	CCDC8	208139	119079	163609	1e+06	991206	995604	649197	656504	652850	831995	489241
High	Master Protein	Q9BTE3	Mini-chromosome maintenance complex-binding protein OS=Homo sapiens OX=9606 GN=MCMBP PE=1 SV=2	11	4	10	4	72.9	MCMBP		225887	225887	3.36512e+06	2.6862e+06	3.02566e+06	1.88994e+06	2.10239e+06	1.99616e+06	2.79977e+06	1.77027e+06
High	Master Protein	Q9BPX3	Condensin complex subunit 3 OS=Homo sapiens OX=9606 GN=NCAPG PE=1 SV=1	4	4	10	4	114.3	NCAPG	583220	221745	402482	3.76331e+06	2.33048e+06	3.0469e+06	2.72227e+06	2.63322e+06	2.67774e+06	2.64441e+06	2.27526e+06
High	Master Protein	O75915	PRA1 family protein 3 OS=Homo sapiens OX=9606 GN=ARL6IP5 PE=1 SV=1	21	3	10	3	21.6	ARL6IP5	194700	224935	209818	7022958	4.96814e+06	5.99555e+06	4.70576e+06	4.64039e+06	4.67307e+06	5.78573e+06	4.46326e+06
High	Master Protein	Q8WUY8	Probable N-acetyltransferase 14 OS=Homo sapiens OX=9606 GN=NAT14 PE=1 SV=1	23	3	10	3	21.6	NAT14	275489	280844	278166	10523370	7.80922e+06	9.16629e+06	6.856e+06	8.031e+06	7443498	8.88813e+06	7.16533e+06
High	Master Protein	Q9UPY5	Cystine/glutamate transporter OS=Homo sapiens OX=9606 GN=SLC7A11 PE=1 SV=1	6	3	10	3	55.4	SLC7A11	131066		131066	10856930	7.76601e+06	9.31147e+06	5.91645e+06	6.78258e+06	6.34951e+06	9.1804e+06	6.21845e+06
High	Master Protein	Q53S58	Transmembrane protein 177 OS=Homo sapiens OX=9606 GN=TMEM177 PE=1 SV=1	19	4	10	4	33.7	TMEM177	266438	482578	374508	11530427	8.57735e+06	1.00539e+07	6474781	7.64087e+06	7.05783e+06	9.67938e+06	6.68332e+06
High	Master Protein	Q3KQU3	MAP7 domain-containing protein 1 OS=Homo sapiens OX=9606 GN=MAP7D1 PE=1 SV=1	5	3	10	3	92.8	MAP7D1	3.52379e+06	2.34184e+06	2.93282e+06	5.05773e+06	3.53447e+06	4.2961e+06	2.71568e+06	4.1581e+06	3.43689e+06	1.36328e+06	504072
High	Master Protein	P55196	Afadin OS=Homo sapiens OX=9606 GN=AFDN PE=1 SV=3	2	3	10	3	206.7	AFDN	459425	270380	364902	1.4645e+06	1.2678e+06	1.36615e+06	879663	1.05667e+06	968167	1.00125e+06	603264
High	Master Protein	Q6ZRV2	Protein FAM83H OS=Homo sapiens OX=9606 GN=FAM83H PE=1 SV=3	7	5	10	5	127	FAM83H	106948	250577	178762	4.91437e+06	3.68143e+06	4.2979e+06	1.73278e+06	2.43919e+06	2.08599e+06	4.11914e+06	1.90722e+06
High	Master Protein	Q13586	Stromal interaction molecule 1 OS=Homo sapiens OX=9606 GN=STIM1 PE=1 SV=3	7	3	10	3	77.4	STIM1	55437.7		55437.7	5.57362e+06	4.27673e+06	4.92517e+06	3.54866e+06	3.73561e+06	3.64213e+06	4.86974e+06	3.58669e+06
High	Master Protein	Q9UJC3	Protein Hook homolog 1 OS=Homo sapiens OX=9606 GN=HOOK1 PE=1 SV=2	12	6	9	6	84.6	HOOK1	301728	461715	381721	1.65243e+06	2.93022e+06	2.29133e+06	2.0576e+06	1.89336e+06	1.97548e+06	1.9096e+06	1.59376e+06
High	Master Protein	O75964	ATP synthase subunit g, mitochondrial OS=Homo sapiens OX=9606 GN=ATP5MG PE=1 SV=3	35	4	9	4	11.4	ATP5MG	285367		285367	9.22353e+06	4.6964e+06	6.95996e+06	2.65067e+06	2.07119e+06	2.36093e+06	6.6746e+06	2.07556e+06
High	Master Protein	Q9Y6D9	Mitotic spindle assembly checkpoint protein MAD1 OS=Homo sapiens OX=9606 GN=MAD1L1 PE=1 SV=2	5	4	9	4	83	MAD1L1	86887.5	357177	222032	7.47212e+06	5.51493e+06	6.49352e+06	4.33874e+06	4.59949e+06	4.46911e+06	6.27149e+06	4.24708e+06
High	Master Protein	Q9BZE4	GTP-binding protein 4 OS=Homo sapiens OX=9606 GN=GTPBP4 PE=1 SV=3	4	3	9	3	73.9	GTPBP4	111220	593024	352122	3.89183e+06	4.14227e+06	4.01705e+06	2.45584e+06	3.1157e+06	2.78577e+06	3.66493e+06	2.43365e+06
High	Master Protein	Q05823	2-5A-dependent ribonuclease OS=Homo sapiens OX=9606 GN=RNASEL PE=1 SV=2	4	4	9	4	83.5	RNASEL			#DIV/0!	4.32421e+06	2.21017e+06	3.26719e+06	3.30958e+06	3.9895e+06	3.64954e+06	#DIV/0!	#DIV/0!
High	Master Protein	P49720	Proteasome subunit beta type-3 OS=Homo sapiens OX=9606 GN=PSMB3 PE=1 SV=2	23	3	9	3	22.9	PSMB3	738270	217207	477738	6.95938e+06	4.13659e+06	5.54799e+06	4.36915e+06	5.62297e+06	4.99606e+06	5.07025e+06	4.51832e+06
High	Master Protein	Q9Y2S7	Polymerase delta-interacting protein 2 OS=Homo sapiens OX=9606 GN=POLDIP2 PE=1 SV=1	11	3	9	3	42	POLDIP2	682500	401964	542232	3.24117e+06	3.01853e+06	3.12985e+06	2.87289e+06	3.48944e+06	3.18116e+06	2.58762e+06	2.63893e+06
High	Master Protein	A2RU67	Protein FAM234B OS=Homo sapiens OX=9606 GN=FAM234B PE=1 SV=1	3	2	9	2	67	FAM234B			#DIV/0!	1.45221e+06	1.29982e+06	1.37601e+06	868270	1.3207e+06	1.09449e+06	#DIV/0!	#DIV/0!
High	Master Protein	Q7L5D6	Golgi to ER traffic protein 4 homolog OS=Homo sapiens OX=9606 GN=GET4 PE=1 SV=1	16	4	9	4	36.5	GET4	1.39247e+06		1.39247e+06	8.00352e+06	5.69587e+06	6.84969e+06	5.26552e+06	8.91253e+06	7.08902e+06	5.45722e+06	5.69655e+06
High	Master Protein	Q9NX61	Transmembrane protein 161A OS=Homo sapiens OX=9606 GN=TMEM161A PE=1 SV=1	10	4	9	4	53.6	TMEM161A			#DIV/0!	1.45222e+07	9.8194e+06	1.21708e+07	6.71579e+06	8.35871e+06	7.53725e+06	#DIV/0!	#DIV/0!
High	Master Protein	Q13151	Heterogeneous nuclear ribonucleoprotein A0 OS=Homo sapiens OX=9606 GN=HNRNPA0 PE=1 SV=1	14	3	9	3	30.8	HNRNPA0	274905	74903.5	174904	3.01493e+06	2.28669e+06	2.65081e+06	1325237	2.72625e+06	2.02574e+06	2.47591e+06	1.85084e+06
High	Master Protein	Q13395	Probable methyltransferase TARBP1 OS=Homo sapiens OX=9606 GN=TARBP1 PE=1 SV=1	3	5	9	5	181.6	TARBP1		74919.2	74919.2	3.38602e+06	2.6776e+06	3.03181e+06	1968746	1.89379e+06	1.93127e+06	2.95689e+06	1.85635e+06
High	Master Protein	Q7Z417	FMR1-interacting protein NUFIP2 OS=Homo sapiens OX=9606 GN=NUFIP2 PE=1 SV=1	5	3	9	3	76.1	NUFIP2	1.89363e+06	1.35272e+06	1.62317e+06	3.0904e+06	2.2186e+06	2.6545e+06	2.00205e+06	2.30552e+06	2.15378e+06	1.03133e+06	530613
High	Master Protein	O75390	Citrate synthase, mitochondrial OS=Homo sapiens OX=9606 GN=CS PE=1 SV=2	7	3	9	3	51.7	CS	3.04616e+06	1.72744e+06	2.3868e+06	7.67065e+06	5173018	6.42184e+06	3.24978e+06	4.3105e+06	3.78014e+06	4.03504e+06	1.39334e+06
High	Master Protein	Q9Y4C2	TRPM8 channel-associated factor 1 OS=Homo sapiens OX=9606 GN=TCAF1 PE=1 SV=3	7	5	9	5	102.1	TCAF1	601595	605605	603600	6.8105e+06	4.88605e+06	5.84827e+06	5.81548e+06	4211692	5.01359e+06	5.24467e+06	4.40999e+06
High	Master Protein	P19022	Cadherin-2 OS=Homo sapiens OX=9606 GN=CDH2 PE=1 SV=4	14	6	9	6	99.7	CDH2	757000	438738	597869	5.41229e+06	6.48275e+06	5.94752e+06	4595038	3.58154e+06	4.08829e+06	5.34965e+06	3.49042e+06
High	Master Protein	Q9HCN8	Stromal cell-derived factor 2-like protein 1 OS=Homo sapiens OX=9606 GN=SDF2L1 PE=1 SV=2	33	4	9	4	23.6	SDF2L1	1.18744e+06	761887	974665	1.0859e+07	7.01547e+06	8.93723e+06	6.80424e+06	1.00069e+07	8.40559e+06	7.96257e+06	7.43093e+06
High	Master Protein	Q05932	Folylpolyglutamate synthase, mitochondrial OS=Homo sapiens OX=9606 GN=FPGS PE=1 SV=3	11	4	9	4	64.6	FPGS	268839		268839	4.82948e+06	4.61884e+06	4.72416e+06	4.26826e+06	3.98403e+06	4.12615e+06	4.45532e+06	3.85731e+06
High	Master Protein	Q96GD4	Aurora kinase B OS=Homo sapiens OX=9606 GN=AURKB PE=1 SV=3	15	4	9	4	39.3	AURKB	742588	533852	638220	5.86512e+06	3.53414e+06	4.69963e+06	2.52338e+06	3.37211e+06	2.94775e+06	4.06141e+06	2.30953e+06
High	Master Protein	O00233	26S proteasome non-ATPase regulatory subunit 9 OS=Homo sapiens OX=9606 GN=PSMD9 PE=1 SV=3	14	3	9	3	24.7	PSMD9	572456	175995	374226	3.63718e+06	2.69866e+06	3.16792e+06	2.93427e+06	3.4574e+06	3.19583e+06	2.79369e+06	2.82161e+06
High	Master Protein	P38159	RNA-binding motif protein, X chromosome OS=Homo sapiens OX=9606 GN=RBMX PE=1 SV=3	11	4	9	4	42.3	RBMX	1.77505e+06	1.03106e+06	1.40305e+06	7.40192e+06	3819704	5.61081e+06	2400336	5039770	3720053	4.20776e+06	2.317e+06
High	Master Protein	P39060	Collagen alpha-1(XVIII) chain OS=Homo sapiens OX=9606 GN=COL18A1 PE=1 SV=5	3	3	9	3	178.1	COL18A1	605930	578221	592075	1.07599e+06	841064	958526	792853	669890	731371	366450	139296
High	Master Protein	Q5SVS4	Kidney mitochondrial carrier protein 1 OS=Homo sapiens OX=9606 GN=SLC25A30 PE=1 SV=1	14	3	9	3	32.5	SLC25A30			#DIV/0!	6.91108e+06	4.98257e+06	5.94683e+06	2.27113e+06	4.96966e+06	3.62039e+06	#DIV/0!	#DIV/0!
High	Master Protein	Q9Y6J9	TAF6-like RNA polymerase II p300/CBP-associated factor-associated factor 65 kDa subunit 6L OS=Homo sapiens OX=9606 GN=TAF6L PE=1 SV=1	11	4	9	4	67.8	TAF6L	551726	680579	616153	4692349	4.32076e+06	4.50655e+06	2.44707e+06	3.66973e+06	3.0584e+06	3.8904e+06	2.44225e+06
High	Master Protein	Q7Z3B4	Nucleoporin p54 OS=Homo sapiens OX=9606 GN=NUP54 PE=1 SV=2	13	5	9	5	55.4	NUP54	372952		372952	3.04534e+06	4.23502e+06	3.64018e+06	3.35269e+06	4.69329e+06	4.02299e+06	3.26723e+06	3.65004e+06
High	Master Protein	Q5BKZ1	DBIRD complex subunit ZNF326 OS=Homo sapiens OX=9606 GN=ZNF326 PE=1 SV=2	9	4	9	4	65.6	ZNF326		300924	300924	4275070	4.37371e+06	4.32439e+06	3.38376e+06	3.23254e+06	3.30815e+06	4.02346e+06	3.00723e+06
High	Master Protein	Q5SQN1	Synaptosomal-associated protein 47 OS=Homo sapiens OX=9606 GN=SNAP47 PE=1 SV=3	19	6	9	6	52.5	SNAP47		160567	160567	4.84252e+06	3.37843e+06	4.11048e+06	1.69647e+06	3.1387e+06	2.41758e+06	3.94991e+06	2.25702e+06
High	Master Protein	Q8WU76	Sec1 family domain-containing protein 2 OS=Homo sapiens OX=9606 GN=SCFD2 PE=1 SV=2	7	3	9	3	75.1	SCFD2			#DIV/0!	2.55252e+06	1.90028e+06	2.2264e+06	1.44e+06	2.18292e+06	1.81146e+06	#DIV/0!	#DIV/0!
High	Master Protein	P20339	Ras-related protein Rab-5A OS=Homo sapiens OX=9606 GN=RAB5A PE=1 SV=2	17	3	9	2	23.6	RAB5A			#DIV/0!	2.53589e+06	1.66893e+06	2.10241e+06	1.41456e+06	2.03929e+06	1.72692e+06	#DIV/0!	#DIV/0!
High	Master Protein	P51398	Small ribosomal subunit protein mS29 OS=Homo sapiens OX=9606 GN=DAP3 PE=1 SV=1	10	3	9	3	45.5	DAP3	278905	265937	272421	4.67993e+06	2.31821e+06	3.49907e+06	2003253	2.92006e+06	2.46166e+06	3.22665e+06	2.18924e+06
High	Master Protein	O60318	Germinal-center associated nuclear protein OS=Homo sapiens OX=9606 GN=MCM3AP PE=1 SV=2	2	4	9	4	218.3	MCM3AP			#DIV/0!	2.08922e+06	2.02336e+06	2.05629e+06	924716	1.20194e+06	1.06333e+06	#DIV/0!	#DIV/0!
High	Master Protein	Q969M3	Protein YIPF5 OS=Homo sapiens OX=9606 GN=YIPF5 PE=1 SV=1	8	2	9	2	28	YIPF5			#DIV/0!	25398896	20015711	2.27073e+07	18072198	18596400	18334299	#DIV/0!	#DIV/0!
High	Master Protein	O43324	Eukaryotic translation elongation factor 1 epsilon-1 OS=Homo sapiens OX=9606 GN=EEF1E1 PE=1 SV=1	20	2	9	2	19.8	EEF1E1	1.80263e+06	1.09107e+06	1.44685e+06	3.82103e+06	2.41201e+06	3.11652e+06	2.44283e+06	1.83085e+06	2.13684e+06	1.66967e+06	689993
High	Master Protein	Q9P2J5	Leucine--tRNA ligase, cytoplasmic OS=Homo sapiens OX=9606 GN=LARS1 PE=1 SV=2	5	4	9	4	134.4	LARS1	1.93426e+06	1.37667e+06	1.65546e+06	1.89779e+06	1.3298e+06	1.6138e+06	922070	1.08233e+06	1.0022e+06	-41666.9	-653267
High	Master Protein	P25686	DnaJ homolog subfamily B member 2 OS=Homo sapiens OX=9606 GN=DNAJB2 PE=1 SV=3	11	3	9	3	35.6	DNAJB2	125608	348006	236807	6.50381e+06	4.38221e+06	5.44301e+06	3.11531e+06	4.86848e+06	3.99189e+06	5.2062e+06	3.75508e+06
High	Master Protein	O94910	Adhesion G protein-coupled receptor L1 OS=Homo sapiens OX=9606 GN=ADGRL1 PE=1 SV=1	2	3	9	2	162.6	ADGRL1			#DIV/0!	2.33351e+06	1.89342e+06	2.11346e+06	1.55332e+06	1.72096e+06	1.63714e+06	#DIV/0!	#DIV/0!
High	Master Protein	Q5D862	Filaggrin-2 OS=Homo sapiens OX=9606 GN=FLG2 PE=1 SV=1	6	5	9	5	247.9	FLG2	1.0182e+06	2.16168e+06	1.58994e+06	601352	105674	353513	223358	188725	206041	-1.23643e+06	-1.3839e+06
High	Master Protein	O43837	Isocitrate dehydrogenase [NAD] subunit beta, mitochondrial OS=Homo sapiens OX=9606 GN=IDH3B PE=1 SV=2	14	4	9	4	42.2	IDH3B	278626	400942	339784	4.11424e+06	3.42163e+06	3.76793e+06	2.64825e+06	3.51434e+06	3.08129e+06	3.42815e+06	2.74151e+06
High	Master Protein	Q96S55	ATPase WRNIP1 OS=Homo sapiens OX=9606 GN=WRNIP1 PE=1 SV=2	9	5	9	5	72.1	WRNIP1	123054	480864	301959	6.58576e+06	5.80966e+06	6.19771e+06	5259203	4.71053e+06	4.98487e+06	5.89575e+06	4.68291e+06
High	Master Protein	Q13085	Acetyl-CoA carboxylase 1 OS=Homo sapiens OX=9606 GN=ACACA PE=1 SV=2	2	3	9	3	265.4	ACACA	1.63843e+06	1.72595e+06	1.68219e+06	3.51873e+06	2883599	3.20117e+06	2.50231e+06	2.55087e+06	2.52659e+06	1.51897e+06	844400
High	Master Protein	P61073	C-X-C chemokine receptor type 4 OS=Homo sapiens OX=9606 GN=CXCR4 PE=1 SV=1	9	3	9	3	39.7	CXCR4			#DIV/0!	3.44663e+06	2.43026e+06	2.93845e+06	2.08402e+06	2.40413e+06	2.24407e+06	#DIV/0!	#DIV/0!
High	Master Protein	Q9H2M9	Rab3 GTPase-activating protein non-catalytic subunit OS=Homo sapiens OX=9606 GN=RAB3GAP2 PE=1 SV=1	5	5	9	5	155.9	RAB3GAP2	450578	621188	535883	3.10353e+06	2.23665e+06	2.67009e+06	1.38446e+06	1.24959e+06	1.31703e+06	2.1342e+06	781143
High	Master Protein	P51151	Ras-related protein Rab-9A OS=Homo sapiens OX=9606 GN=RAB9A PE=1 SV=1	34	4	9	4	22.8	RAB9A			#DIV/0!	3.98724e+06	4.20962e+06	4.09843e+06	4.35692e+06	5.97215e+06	5.16453e+06	#DIV/0!	#DIV/0!
High	Master Protein	Q9H773	dCTP pyrophosphatase 1 OS=Homo sapiens OX=9606 GN=DCTPP1 PE=1 SV=1	26	3	9	3	18.7	DCTPP1	1.01173e+06	719206	865470	6.84723e+06	3.72883e+06	5.28803e+06	2.72088e+06	5.9877e+06	4.35429e+06	4.42256e+06	3.48882e+06
High	Master Protein	Q5SY16	Polynucleotide 5'-hydroxyl-kinase NOL9 OS=Homo sapiens OX=9606 GN=NOL9 PE=1 SV=1	9	4	9	4	79.3	NOL9			#DIV/0!	4.94428e+06	3.25059e+06	4.09743e+06	2.78214e+06	3.66687e+06	3.2245e+06	#DIV/0!	#DIV/0!
High	Master Protein	Q01804	OTU domain-containing protein 4 OS=Homo sapiens OX=9606 GN=OTUD4 PE=1 SV=4	5	5	9	5	124	OTUD4			#DIV/0!	5976266	4.85338e+06	5.41482e+06	2.74845e+06	1.83066e+06	2.28955e+06	#DIV/0!	#DIV/0!
High	Master Protein	P60900	Proteasome subunit alpha type-6 OS=Homo sapiens OX=9606 GN=PSMA6 PE=1 SV=1	17	3	9	3	27.4	PSMA6	655248	504041	579645	8.09257e+06	5.72198e+06	6.90727e+06	4.91441e+06	7.79443e+06	6.35442e+06	6.32763e+06	5.77478e+06
High	Master Protein	Q8NBT2	Kinetochore protein Spc24 OS=Homo sapiens OX=9606 GN=SPC24 PE=1 SV=3	32	4	9	4	22.4	SPC24	1.78238e+06	1.35228e+06	1.56733e+06	9277501	4.99551e+06	7.13651e+06	4.04085e+06	6.99935e+06	5.5201e+06	5.56918e+06	3.95277e+06
High	Master Protein	Q13557	Calcium/calmodulin-dependent protein kinase type II subunit delta OS=Homo sapiens OX=9606 GN=CAMK2D PE=1 SV=3	9	3	9	3	56.3	CAMK2D	2.38746e+06	1.68101e+06	2.03424e+06	3.33019e+06	1.89568e+06	2.61293e+06	1.66756e+06	2.43057e+06	2.04906e+06	578698	14828.2
High	Master Protein	P05091	Aldehyde dehydrogenase, mitochondrial OS=Homo sapiens OX=9606 GN=ALDH2 PE=1 SV=2	10	4	9	3	56.3	ALDH2	260492	166423	213458	2.63961e+06	2.3599e+06	2.49975e+06	1.86995e+06	1.59015e+06	1.73005e+06	2.2863e+06	1.51659e+06
High	Master Protein	Q9H7D7	WD repeat-containing protein 26 OS=Homo sapiens OX=9606 GN=WDR26 PE=1 SV=3	7	3	9	3	72.1	WDR26	212890	267429	240159	3.12788e+06	2.65643e+06	2.89216e+06	2600979	2.39875e+06	2.49987e+06	2.652e+06	2.25971e+06
High	Master Protein	P51153	Ras-related protein Rab-13 OS=Homo sapiens OX=9606 GN=RAB13 PE=1 SV=1	17	3	9	2	22.8	RAB13	223062	164302	193682	3.54781e+06	2.02508e+06	2.78644e+06		3053480	3053480	2.59276e+06	2.8598e+06
High	Master Protein	Q9BZH6	WD repeat-containing protein 11 OS=Homo sapiens OX=9606 GN=WDR11 PE=1 SV=1	2	2	9	2	136.6	WDR11	1.17941e+06	922673	1.05104e+06	6865868	3.66813e+06	5.267e+06	5.17447e+06	5388029	5.28125e+06	4.21596e+06	4.23021e+06
High	Master Protein	O14967	Calmegin OS=Homo sapiens OX=9606 GN=CLGN PE=1 SV=1	9	5	9	4	70	CLGN		327069	327069	3.09706e+06	1.85483e+06	2.47594e+06	1.85732e+06	2.17907e+06	2.0182e+06	2.14887e+06	1.69113e+06
High	Master Protein	Q96I99	Succinate--CoA ligase [GDP-forming] subunit beta, mitochondrial OS=Homo sapiens OX=9606 GN=SUCLG2 PE=1 SV=2	9	4	9	4	46.5	SUCLG2	1.0179e+06	1.02492e+06	1.02141e+06	4.92804e+06	5.0576e+06	4.99282e+06	2.67558e+06	2.32154e+06	2.49856e+06	3.97141e+06	1.47715e+06
High	Master Protein	P63241	Eukaryotic translation initiation factor 5A-1 OS=Homo sapiens OX=9606 GN=EIF5A PE=1 SV=2	23	3	9	3	16.8	EIF5A	915289	503267	709278	3.65374e+06	2.06431e+06	2.85903e+06	1743782	1.85374e+06	1.79876e+06	2.14975e+06	1.08948e+06
High	Master Protein	P46778	Large ribosomal subunit protein eL21 OS=Homo sapiens OX=9606 GN=RPL21 PE=1 SV=2	16	2	9	2	18.6	RPL21	787301	1.23469e+06	1.011e+06	8460987	7.65242e+06	8.05671e+06	7.24317e+06	11776673	9.50992e+06	7.04571e+06	8.49893e+06
High	Master Protein	Q10567	AP-1 complex subunit beta-1 OS=Homo sapiens OX=9606 GN=AP1B1 PE=1 SV=3	6	5	9	3	104.5	AP1B1	5.93472e+06	5.26424e+06	5.59948e+06	2.72989e+06	4.17974e+06	3.45481e+06	3146835	3.17313e+06	3.15998e+06	-2.14466e+06	-2.4395e+06
High	Master Protein	Q96L92	Sorting nexin-27 OS=Homo sapiens OX=9606 GN=SNX27 PE=1 SV=2	5	3	9	3	61.2	SNX27	724685	734273	729479	6.62652e+06	5.56101e+06	6.09376e+06	4.07879e+06	4.60904e+06	4.34391e+06	5.36428e+06	3.61443e+06
High	Master Protein	Q6ZXV5	Protein O-mannosyl-transferase TMTC3 OS=Homo sapiens OX=9606 GN=TMTC3 PE=1 SV=2	5	4	9	3	103.9	TMTC3	8.34186e+06	2.22408e+06	5282971	4.25809e+06	3.52886e+06	3.89348e+06	2.41435e+06	3470955	2.94265e+06	-1.38949e+06	-2.34032e+06
High	Master Protein	Q9UL03	Integrator complex subunit 6 OS=Homo sapiens OX=9606 GN=INTS6 PE=1 SV=1	7	5	9	4	100.3	INTS6	219831	174380	197105	2.34319e+06	2.14545e+06	2.24432e+06	2.04002e+06	1.93924e+06	1.98963e+06	2.04721e+06	1.79253e+06
High	Master Protein	Q96CU9	FAD-dependent oxidoreductase domain-containing protein 1 OS=Homo sapiens OX=9606 GN=FOXRED1 PE=1 SV=2	7	3	9	3	53.8	FOXRED1	816947	647102	732024	3.48231e+06	2.93147e+06	3.20689e+06	2.19455e+06	2.53536e+06	2.36496e+06	2.47487e+06	1.63293e+06
High	Master Protein	Q13112	Chromatin assembly factor 1 subunit B OS=Homo sapiens OX=9606 GN=CHAF1B PE=1 SV=1	7	3	9	3	61.5	CHAF1B	307257	111281	209269	1.56918e+06	1.50681e+06	1.538e+06	429810	1.43412e+06	931965	1.32873e+06	722696
High	Master Protein	Q96K19	E3 ubiquitin-protein ligase RNF170 OS=Homo sapiens OX=9606 GN=RNF170 PE=1 SV=2	15	3	9	3	29.8	RNF170			#DIV/0!	3.38045e+06	2.1376e+06	2.75902e+06	2491451	2.94469e+06	2.71807e+06	#DIV/0!	#DIV/0!
High	Master Protein	Q9ULF5	Zinc transporter ZIP10 OS=Homo sapiens OX=9606 GN=SLC39A10 PE=1 SV=2	2	2	9	2	94.1	SLC39A10			#DIV/0!	7.84753e+06	7.47329e+06	7.66041e+06	9.61327e+06	7.84297e+06	8.72812e+06	#DIV/0!	#DIV/0!
High	Master Protein	Q9NUP9	Protein lin-7 homolog C OS=Homo sapiens OX=9606 GN=LIN7C PE=1 SV=1	19	3	9	3	21.8	LIN7C	1.05591e+06	585927	820920	6.49448e+06	3.66719e+06	5.08084e+06	3.0481e+06	4.42059e+06	3.73435e+06	4.25992e+06	2.91343e+06
High	Master Protein	Q16186	Proteasomal ubiquitin receptor ADRM1 OS=Homo sapiens OX=9606 GN=ADRM1 PE=1 SV=2	7	2	9	2	42.1	ADRM1	554558	302015	428287	4.54008e+06	3.7565e+06	4.14829e+06	2.13659e+06	3.03087e+06	2.58373e+06	3.72e+06	2.15545e+06
High	Master Protein	P62834	Ras-related protein Rap-1A OS=Homo sapiens OX=9606 GN=RAP1A PE=1 SV=1	21	4	9	4	21	RAP1A	1.99652e+06	791965	1.39424e+06	9.08539e+06	8.2765e+06	8.68094e+06	9.17989e+06	9.18166e+06	9.18077e+06	7.2867e+06	7.78653e+06
High	Master Protein	Q9H300	Presenilin-associated rhomboid-like protein, mitochondrial OS=Homo sapiens OX=9606 GN=PARL PE=1 SV=2	9	2	9	2	42.2	PARL		69514.5	69514.5	4.72891e+06	2.95078e+06	3.83985e+06	2.50863e+06	2.87773e+06	2.69318e+06	3.77033e+06	2.62367e+06
High	Master Protein	Q92536	Y+L amino acid transporter 2 OS=Homo sapiens OX=9606 GN=SLC7A6 PE=1 SV=3	12	4	9	4	56.8	SLC7A6			#DIV/0!	1.60903e+07	1.28181e+07	1.44542e+07	9.58079e+06	7.25891e+06	8.41985e+06	#DIV/0!	#DIV/0!
High	Master Protein	Q9BQ52	Zinc phosphodiesterase ELAC protein 2 OS=Homo sapiens OX=9606 GN=ELAC2 PE=1 SV=2	6	4	9	4	92.2	ELAC2	292275	175302	233789	6.28707e+06	3.77785e+06	5.03246e+06	3.16624e+06	3.71474e+06	3.44049e+06	4.79867e+06	3.2067e+06
High	Master Protein	O14681	Etoposide-induced protein 2.4 homolog OS=Homo sapiens OX=9606 GN=EI24 PE=1 SV=4	8	3	9	3	38.9	EI24			#DIV/0!	1.27113e+07	8.52358e+06	1.06174e+07	6.03505e+06	7.69551e+06	6.86528e+06	#DIV/0!	#DIV/0!
High	Master Protein	O95801	Tetratricopeptide repeat protein 4 OS=Homo sapiens OX=9606 GN=TTC4 PE=1 SV=3	16	4	9	4	44.7	TTC4	1.6739e+06	1.09711e+06	1.38551e+06	7.32636e+06	4.55623e+06	5.94129e+06	4.02104e+06	5.07932e+06	4.55018e+06	4.55579e+06	3.16467e+06
High	Master Protein	Q8TBP6	Probable mitochondrial glutathione transporter SLC25A40 OS=Homo sapiens OX=9606 GN=SLC25A40 PE=1 SV=1	19	4	9	4	38.1	SLC25A40	186089	118273	152181	4.8082e+06	4.45776e+06	4.63298e+06	3.86749e+06	3.83366e+06	3.85058e+06	4.4808e+06	3.69839e+06
High	Master Protein	P05067	Amyloid-beta precursor protein OS=Homo sapiens OX=9606 GN=APP PE=1 SV=3	7	5	9	5	86.9	APP		462036	462036	6.26914e+06	5.17528e+06	5.72221e+06	2.7578e+06	5.2703e+06	4.01405e+06	5.26017e+06	3.55201e+06
High	Master Protein	P54727	UV excision repair protein RAD23 homolog B OS=Homo sapiens OX=9606 GN=RAD23B PE=1 SV=1	14	3	9	3	43.1	RAD23B	385945	164518	275232	3.56742e+06	4.31448e+06	3.94095e+06	2.76335e+06	3819738	3.29155e+06	3.66572e+06	3016314
High	Master Protein	Q86U38	Nucleolar protein 9 OS=Homo sapiens OX=9606 GN=NOP9 PE=1 SV=1	7	3	9	3	69.4	NOP9	996423	884955	940689	9775413	8.12147e+06	8.94844e+06	4.77766e+06	4.71224e+06	4.74495e+06	8.00775e+06	3.80426e+06
High	Master Protein	P46019	Phosphorylase b kinase regulatory subunit alpha, liver isoform OS=Homo sapiens OX=9606 GN=PHKA2 PE=1 SV=1	7	6	9	6	138.3	PHKA2			#DIV/0!	5.5823e+06	3.70082e+06	4.64156e+06	3.06418e+06	3.00917e+06	3.03667e+06	#DIV/0!	#DIV/0!
High	Master Protein	Q9BZE1	Large ribosomal subunit protein mL37 OS=Homo sapiens OX=9606 GN=MRPL37 PE=1 SV=2	14	5	9	5	48.1	MRPL37	568930	490985	529958	1.0961e+07	7.85756e+06	9.40927e+06	7226238	6.63143e+06	6.92884e+06	8.87931e+06	6.39888e+06
High	Master Protein	Q86UA1	Pre-mRNA-processing factor 39 OS=Homo sapiens OX=9606 GN=PRPF39 PE=1 SV=3	5	3	9	3	78.4	PRPF39			#DIV/0!	4.1655e+06	2.93025e+06	3.54788e+06	3.1717e+06	4.50139e+06	3.83654e+06	#DIV/0!	#DIV/0!
High	Master Protein	Q14C86	GTPase-activating protein and VPS9 domain-containing protein 1 OS=Homo sapiens OX=9606 GN=GAPVD1 PE=1 SV=2	3	3	8	3	164.9	GAPVD1	477870	913707	695789	6474873	5.02883e+06	5.75185e+06	2.41902e+06	3.76739e+06	3.0932e+06	5.05606e+06	2.39741e+06
High	Master Protein	Q16850	Lanosterol 14-alpha demethylase OS=Homo sapiens OX=9606 GN=CYP51A1 PE=1 SV=4	12	5	8	5	57.2	CYP51A1	538671	121431	330051	4.98368e+06	3.48903e+06	4.23635e+06	2.96879e+06	3.86739e+06	3.41809e+06	3.9063e+06	3.08804e+06
High	Master Protein	Q8N2G8	GH3 domain-containing protein OS=Homo sapiens OX=9606 GN=GHDC PE=1 SV=2	7	4	8	4	57.5	GHDC		250079	250079	6.95994e+06	7.17156e+06	7.06575e+06	4.36469e+06	5.63299e+06	4.99884e+06	6.81567e+06	4.74876e+06
High	Master Protein	O00217	NADH dehydrogenase [ubiquinone] iron-sulfur protein 8, mitochondrial OS=Homo sapiens OX=9606 GN=NDUFS8 PE=1 SV=1	23	4	8	4	23.7	NDUFS8	150386		150386	2.82825e+06	667805	1.74803e+06	1.06182e+06	1.59078e+06	1.3263e+06	1.59764e+06	1.17591e+06
High	Master Protein	P27816	Microtubule-associated protein 4 OS=Homo sapiens OX=9606 GN=MAP4 PE=1 SV=3	4	3	8	3	120.9	MAP4	368288	226054	297171	691110	1.65905e+06	1.17508e+06	352522	2.47603e+06	1.41428e+06	877908	1.11711e+06
High	Master Protein	Q96EL3	Large ribosomal subunit protein mL53 OS=Homo sapiens OX=9606 GN=MRPL53 PE=1 SV=1	38	3	8	3	12.1	MRPL53	47293		47293	2.92338e+06	2.12665e+06	2.52501e+06	1.74373e+06	2.12754e+06	1.93563e+06	2.47772e+06	1.88834e+06
High	Master Protein	P51991	Heterogeneous nuclear ribonucleoprotein A3 OS=Homo sapiens OX=9606 GN=HNRNPA3 PE=1 SV=2	9	2	8	2	39.6	HNRNPA3	488939		488939	3.13659e+06	2.28446e+06	2.71053e+06	1.38677e+06	1.93368e+06	1.66023e+06	2.22159e+06	1.17129e+06
High	Master Protein	Q99519	Sialidase-1 OS=Homo sapiens OX=9606 GN=NEU1 PE=1 SV=1	8	3	8	3	45.4	NEU1			#DIV/0!	3.69385e+06	2.3439e+06	3.01887e+06	2.42141e+06	2.90578e+06	2.6636e+06	#DIV/0!	#DIV/0!
High	Master Protein	P18031	Tyrosine-protein phosphatase non-receptor type 1 OS=Homo sapiens OX=9606 GN=PTPN1 PE=1 SV=1	6	2	8	2	49.9	PTPN1	253739	210040	231890	2.69585e+06	2.17801e+06	2436930	1.97684e+06	2.0887e+06	2032771	2.20504e+06	1.80088e+06
High	Master Protein	Q9H0H5	Rac GTPase-activating protein 1 OS=Homo sapiens OX=9606 GN=RACGAP1 PE=1 SV=1	9	5	8	5	71	RACGAP1	1.28183e+06	2.37634e+06	1.82908e+06	4510110	4.2284e+06	4.36926e+06	2.83622e+06	1.75185e+06	2.29404e+06	2.54017e+06	464955
High	Master Protein	Q5VWZ2	Lysophospholipase-like protein 1 OS=Homo sapiens OX=9606 GN=LYPLAL1 PE=1 SV=3	23	4	8	4	26.3	LYPLAL1	283913	623212	453563	1.7856e+07	1.40861e+07	1.5971e+07	1.12454e+07	1.51395e+07	1.31925e+07	1.55175e+07	1.27389e+07
High	Master Protein	P63220	Small ribosomal subunit protein eS21 OS=Homo sapiens OX=9606 GN=RPS21 PE=1 SV=1	41	3	8	3	9.1	RPS21	713028	133307	423168	3.17109e+06	3.50648e+06	3.33878e+06	2.77728e+06	2885323	2.8313e+06	2915616	2.40813e+06
High	Master Protein	Q9BYD3	Large ribosomal subunit protein uL4m OS=Homo sapiens OX=9606 GN=MRPL4 PE=1 SV=1	14	3	8	3	34.9	MRPL4		935694	935694	7.8508e+06	6.44994e+06	7.15037e+06	5.03172e+06	3.84178e+06	4.43675e+06	6.21468e+06	3.50106e+06
High	Master Protein	Q9Y2X3	Nucleolar protein 58 OS=Homo sapiens OX=9606 GN=NOP58 PE=1 SV=1	7	3	8	3	59.5	NOP58	397305	730081	563693	5.93134e+06	9.67997e+06	7.80565e+06	5.26102e+06	6.31889e+06	5.78995e+06	7.24196e+06	5.22626e+06
High	Master Protein	Q15629	Translocating chain-associated membrane protein 1 OS=Homo sapiens OX=9606 GN=TRAM1 PE=1 SV=3	5	3	8	3	43	TRAM1			#DIV/0!	5.34936e+06	3.15914e+06	4.25425e+06	1.90086e+06	3147420	2.52414e+06	#DIV/0!	#DIV/0!
High	Master Protein	Q9NTK5	Obg-like ATPase 1 OS=Homo sapiens OX=9606 GN=OLA1 PE=1 SV=2	7	2	8	2	44.7	OLA1	565048	448603	506826	2.88518e+06	4169562	3.52737e+06	3.74264e+06	1.57692e+06	2.65978e+06	3.02055e+06	2.15295e+06
High	Master Protein	Q15437	Protein transport protein Sec23B OS=Homo sapiens OX=9606 GN=SEC23B PE=1 SV=2	7	4	8	2	86.4	SEC23B			#DIV/0!	820920	695284	758102	913772	293598	603685	#DIV/0!	#DIV/0!
High	Master Protein	P17482	Homeobox protein Hox-B9 OS=Homo sapiens OX=9606 GN=HOXB9 PE=1 SV=2	10	2	8	2	28	HOXB9	665191	461844	563517	3411614	2.70432e+06	3.05797e+06	2.37753e+06	2.88974e+06	2.63364e+06	2.49445e+06	2.07012e+06
High	Master Protein	Q00535	Cyclin-dependent kinase 5 OS=Homo sapiens OX=9606 GN=CDK5 PE=1 SV=3	8	3	8	2	33.3	CDK5	830438	453192	641815	2.96443e+06	2687183	2.8258e+06	2.33728e+06	2.74192e+06	2.5396e+06	2.18399e+06	1.89778e+06
High	Master Protein	O14734	Acyl-coenzyme A thioesterase 8 OS=Homo sapiens OX=9606 GN=ACOT8 PE=1 SV=1	15	3	8	3	35.9	ACOT8	962405		962405	1.13774e+07	7548856	9.46315e+06	7.36785e+06	7.18606e+06	7.27696e+06	8.50074e+06	6.31455e+06
High	Master Protein	Q13585	Melatonin-related receptor OS=Homo sapiens OX=9606 GN=GPR50 PE=1 SV=3	7	3	8	3	67.3	GPR50	200723	156879	178801	1.48569e+06	846787	1.16624e+06	953252	1.31754e+06	1.1354e+06	987436	956597
High	Master Protein	O15460	Prolyl 4-hydroxylase subunit alpha-2 OS=Homo sapiens OX=9606 GN=P4HA2 PE=1 SV=1	8	3	8	3	60.9	P4HA2	129646	206653	168149	3082456	2.82676e+06	2.95461e+06	1249645	2.55084e+06	1.90024e+06	2.78646e+06	1.73209e+06
High	Master Protein	P49810	Presenilin-2 OS=Homo sapiens OX=9606 GN=PSEN2 PE=1 SV=1	8	3	8	1	50.1	PSEN2			#DIV/0!	6.10667e+06	3.92836e+06	5.01752e+06	3.63364e+06	4.00231e+06	3.81798e+06	#DIV/0!	#DIV/0!
High	Master Protein	Q13098	COP9 signalosome complex subunit 1 OS=Homo sapiens OX=9606 GN=GPS1 PE=1 SV=4	9	3	8	3	55.5	GPS1	4.80978e+06	206925	2.50835e+06	1.10652e+06	803072	954796	1.61716e+06	1.98181e+06	1.79948e+06	-1.55356e+06	-708869
High	Master Protein	Q9HDC5	Junctophilin-1 OS=Homo sapiens OX=9606 GN=JPH1 PE=1 SV=2	8	4	8	4	71.6	JPH1			#DIV/0!	5.46629e+06	5.92731e+06	5.6968e+06	5.4171e+06	6.13851e+06	5.7778e+06	#DIV/0!	#DIV/0!
High	Master Protein	P04626	Receptor tyrosine-protein kinase erbB-2 OS=Homo sapiens OX=9606 GN=ERBB2 PE=1 SV=1	5	5	8	5	137.8	ERBB2	262752	310169	286460	5.68394e+06	5.40339e+06	5.54367e+06	4.18508e+06	4.17375e+06	4.17941e+06	5.25721e+06	3.89295e+06
High	Master Protein	Q9Y3E0	Vesicle transport protein GOT1B OS=Homo sapiens OX=9606 GN=GOLT1B PE=1 SV=1	11	2	8	2	15.4	GOLT1B	315768	130765	223267	4.14998e+06	2.31368e+06	3.23183e+06	2.11074e+06	2.42427e+06	2.2675e+06	3.00856e+06	2.04424e+06
High	Master Protein	P62847	Small ribosomal subunit protein eS24 OS=Homo sapiens OX=9606 GN=RPS24 PE=1 SV=1	20	2	8	2	15.4	RPS24	819054	920812	869933	6.72654e+06	3.21672e+06	4.97163e+06	3.70022e+06	4.45319e+06	4.07671e+06	4.10169e+06	3.20677e+06
High	Master Protein	P11413	Glucose-6-phosphate 1-dehydrogenase OS=Homo sapiens OX=9606 GN=G6PD PE=1 SV=4	13	5	8	5	59.2	G6PD	340999	179914	260457	4.30834e+06	2.9862e+06	3.64727e+06	1.99095e+06	3240398	2.61567e+06	3.38681e+06	2.35522e+06
High	Master Protein	O00505	Importin subunit alpha-4 OS=Homo sapiens OX=9606 GN=KPNA3 PE=1 SV=2	4	2	8	2	57.8	KPNA3		403631	403631	3.59314e+06	4.77762e+06	4.18538e+06	3.59704e+06	4.09849e+06	3.84777e+06	3.78175e+06	3.44414e+06
High	Master Protein	Q9H2U1	ATP-dependent DNA/RNA helicase DHX36 OS=Homo sapiens OX=9606 GN=DHX36 PE=1 SV=2	2	2	8	2	114.7	DHX36	434759	787627	611193	4.24064e+06	3.55985e+06	3.90024e+06	4.24659e+06	4.03785e+06	4.14222e+06	3.28905e+06	3.53103e+06
High	Master Protein	Q9Y657	Spindlin-1 OS=Homo sapiens OX=9606 GN=SPIN1 PE=1 SV=3	15	3	8	2	29.6	SPIN1			#DIV/0!	1.90864e+07	9.91877e+06	1.45026e+07	6.6291e+06	1.21511e+07	9.39013e+06	#DIV/0!	#DIV/0!
High	Master Protein	P49821	NADH dehydrogenase [ubiquinone] flavoprotein 1, mitochondrial OS=Homo sapiens OX=9606 GN=NDUFV1 PE=1 SV=4	9	4	8	4	50.8	NDUFV1	189390	205690	197540	3.87727e+06	2.75177e+06	3.31452e+06	2.13387e+06	3.04139e+06	2.58763e+06	3.11698e+06	2.39009e+06
High	Master Protein	Q96AE7	Tetratricopeptide repeat protein 17 OS=Homo sapiens OX=9606 GN=TTC17 PE=1 SV=1	3	3	8	3	129.5	TTC17			#DIV/0!	3.93186e+06	1.44055e+06	2.6862e+06	1.80349e+06	2.23583e+06	2.01966e+06	#DIV/0!	#DIV/0!
High	Master Protein	Q8TDD1	ATP-dependent RNA helicase DDX54 OS=Homo sapiens OX=9606 GN=DDX54 PE=1 SV=2	2	2	8	2	98.5	DDX54	245774	184958	215366	923415	738968	831191	408443	412393	410418	615825	195052
High	Master Protein	Q8WVD3	E3 ubiquitin-protein ligase RNF138 OS=Homo sapiens OX=9606 GN=RNF138 PE=1 SV=1	14	2	8	2	28.2	RNF138	632855	266398	449626	2.36167e+06	1.58162e+06	1.97164e+06	1.12503e+06	1591993	1.35851e+06	1.52202e+06	908887
High	Master Protein	Q96QK1	Vacuolar protein sorting-associated protein 35 OS=Homo sapiens OX=9606 GN=VPS35 PE=1 SV=2	5	3	8	3	91.6	VPS35	546015	573922	559969	3128647	1.74005e+06	2.43435e+06	1.79975e+06	2.93346e+06	2.36661e+06	1.87438e+06	1.80664e+06
High	Master Protein	Q9BUJ2	Heterogeneous nuclear ribonucleoprotein U-like protein 1 OS=Homo sapiens OX=9606 GN=HNRNPUL1 PE=1 SV=2	5	3	8	3	95.7	HNRNPUL1	242250		242250	2911450	2.14197e+06	2.52671e+06	1686951	1.75905e+06	1.723e+06	2.28446e+06	1.48075e+06
High	Master Protein	P50502	Hsc70-interacting protein OS=Homo sapiens OX=9606 GN=ST13 PE=1 SV=2	7	2	8	2	41.3	ST13	3243957	1.63701e+06	2.44048e+06	2.81177e+06	2485974	2.64887e+06	1.87445e+06	1.58349e+06	1.72897e+06	208390	-711515
High	Master Protein	Q9HBH1	Peptide deformylase, mitochondrial OS=Homo sapiens OX=9606 GN=PDF PE=1 SV=1	16	4	8	4	27	PDF	755018	677892	716455	4.42477e+06	4.24428e+06	4.33453e+06	4.3712e+06	4.95684e+06	4.66402e+06	3.61807e+06	3.94757e+06
High	Master Protein	Q8IWA0	WD repeat-containing protein 75 OS=Homo sapiens OX=9606 GN=WDR75 PE=1 SV=1	6	5	8	5	94.4	WDR75	51791.1		51791.1	3.63373e+06	3.21253e+06	3.42313e+06	2.99828e+06	3.46732e+06	3.2328e+06	3.37134e+06	3.18101e+06
High	Master Protein	Q99720	Sigma non-opioid intracellular receptor 1 OS=Homo sapiens OX=9606 GN=SIGMAR1 PE=1 SV=1	22	3	8	3	25.1	SIGMAR1	1.07213e+06	849385	960756	15854622	1.09578e+07	1.34062e+07	9.58959e+06	1.15802e+07	1.05849e+07	1.24454e+07	9.62413e+06
High	Master Protein	P30048	Thioredoxin-dependent peroxide reductase, mitochondrial OS=Homo sapiens OX=9606 GN=PRDX3 PE=1 SV=3	10	2	8	2	27.7	PRDX3	3.46588e+06	2.47165e+06	2.96876e+06	6.26061e+06	4.58914e+06	5.42488e+06	4.19625e+06	4.44228e+06	4.31926e+06	2.45611e+06	1.3505e+06
High	Master Protein	Q14566	DNA replication licensing factor MCM6 OS=Homo sapiens OX=9606 GN=MCM6 PE=1 SV=1	4	3	8	3	92.8	MCM6	470048	369913	419981	2.10516e+06	1.59881e+06	1.85199e+06	1.45846e+06	1.33453e+06	1.39649e+06	1.43201e+06	976513
High	Master Protein	Q9Y467	Sal-like protein 2 OS=Homo sapiens OX=9606 GN=SALL2 PE=1 SV=4	7	4	8	4	105.2		67978.2		67978.2	3.29374e+06	2.45654e+06	2.87514e+06	1.38936e+06	1.7089e+06	1.54913e+06	2.80716e+06	1.48115e+06
High	Master Protein	O15111	Inhibitor of nuclear factor kappa-B kinase subunit alpha OS=Homo sapiens OX=9606 GN=CHUK PE=1 SV=2	3	3	8	2	84.6	CHUK	1.12467e+06	847755	986213	5.37367e+06	5.02754e+06	5.2006e+06	3.54679e+06	4215205	3.881e+06	4.21439e+06	2.89479e+06
High	Master Protein	Q13546	Receptor-interacting serine/threonine-protein kinase 1 OS=Homo sapiens OX=9606 GN=RIPK1 PE=1 SV=3	5	3	8	3	75.9	RIPK1	181573	207982	194777	3.67976e+06	2.87706e+06	3.27841e+06	1.945e+06	2.71167e+06	2.32833e+06	3.08363e+06	2.13356e+06
High	Master Protein	Q99873	Protein arginine N-methyltransferase 1 OS=Homo sapiens OX=9606 GN=PRMT1 PE=1 SV=3	11	3	8	3	42.4	PRMT1	742119	430709	586414	6.90443e+06	5.74524e+06	6.32484e+06	4.02805e+06	8.08324e+06	6.05564e+06	5.73842e+06	5.46923e+06
High	Master Protein	Q96GC9	Vacuole membrane protein 1 OS=Homo sapiens OX=9606 GN=VMP1 PE=1 SV=1	9	2	8	2	46.2	VMP1		198502	198502	8.54307e+06	5.90543e+06	7.22425e+06	3.75938e+06	5.31515e+06	4.53727e+06	7.02575e+06	4.33876e+06
High	Master Protein	Q14008	Cytoskeleton-associated protein 5 OS=Homo sapiens OX=9606 GN=CKAP5 PE=1 SV=3	2	3	8	3	225.4	CKAP5	599228	800497	699863	2.24372e+06	2.05516e+06	2.14944e+06	185346	1.12643e+06	655890	1.44958e+06	-43973.1
High	Master Protein	Q9C0C7	Activating molecule in BECN1-regulated autophagy protein 1 OS=Homo sapiens OX=9606 GN=AMBRA1 PE=1 SV=2	5	3	8	3	142.4	AMBRA1	79101		79101	4.47232e+06	2.36152e+06	3.41692e+06	2.70424e+06	3.11529e+06	2.90976e+06	3.33782e+06	2.83066e+06
High	Master Protein	Q9BVV7	Mitochondrial import inner membrane translocase subunit Tim21 OS=Homo sapiens OX=9606 GN=TIMM21 PE=1 SV=1	21	5	8	5	28.2	TIMM21	202034	130434	166234	1.33604e+07	9.81988e+06	1.15902e+07	7.37205e+06	9.37373e+06	8.37289e+06	1.14239e+07	8.20665e+06
High	Master Protein	P61221	ATP-binding cassette sub-family E member 1 OS=Homo sapiens OX=9606 GN=ABCE1 PE=1 SV=1	7	3	8	3	67.3	ABCE1	515288	284096	399692	1.49436e+06	1.56995e+06	1.53215e+06	804877	851153	828015	1.13246e+06	428323
High	Master Protein	Q13573	SNW domain-containing protein 1 OS=Homo sapiens OX=9606 GN=SNW1 PE=1 SV=1	3	2	8	2	61.5	SNW1	891905	693199	792552	2.24613e+06	2093475	2.1698e+06	1.60378e+06	2.07763e+06	1.84071e+06	1.37725e+06	1.04815e+06
High	Master Protein	Q5T447	E3 ubiquitin-protein ligase HECTD3 OS=Homo sapiens OX=9606 GN=HECTD3 PE=1 SV=1	7	4	8	4	97.1	HECTD3	286391		286391	1.29762e+06	913262	1.10544e+06	1.03815e+06	987259	1.01271e+06	819052	726314
High	Master Protein	Q9BRS2	Serine/threonine-protein kinase RIO1 OS=Homo sapiens OX=9606 GN=RIOK1 PE=1 SV=2	10	4	8	4	65.5	RIOK1	349556	632544	491050	7.34635e+06	5.37268e+06	6.35951e+06	2.94299e+06	4.35594e+06	3.64947e+06	5.86846e+06	3.15842e+06
High	Master Protein	P27986	Phosphatidylinositol 3-kinase regulatory subunit alpha OS=Homo sapiens OX=9606 GN=PIK3R1 PE=1 SV=2	6	4	8	3	83.5	PIK3R1	197270	238585	217928	2.90471e+06	2.30311e+06	2.60391e+06	2.65627e+06	2.4748e+06	2.56554e+06	2.38598e+06	2.34761e+06
High	Master Protein	Q9NP61	ADP-ribosylation factor GTPase-activating protein 3 OS=Homo sapiens OX=9606 GN=ARFGAP3 PE=1 SV=1	7	3	8	2	56.9	ARFGAP3	236477	182293	209385	415758	232400	324079	185169	192444	188806	114694	-20578.3
High	Master Protein	O94826	Mitochondrial import receptor subunit TOM70 OS=Homo sapiens OX=9606 GN=TOMM70 PE=1 SV=1	8	4	8	4	67.4	TOMM70	252263	350213	301238	5.20377e+06	4.61736e+06	4.91057e+06	3.76714e+06	3.67748e+06	3.72231e+06	4.60933e+06	3.42107e+06
High	Master Protein	Q9H0E2	Toll-interacting protein OS=Homo sapiens OX=9606 GN=TOLLIP PE=1 SV=1	8	2	8	2	30.3	TOLLIP	396093	439222	417658	7.57884e+06	4702872	6.14085e+06	3.35808e+06	4.3634e+06	3.86074e+06	5.7232e+06	3.44308e+06
High	Master Protein	P31942	Heterogeneous nuclear ribonucleoprotein H3 OS=Homo sapiens OX=9606 GN=HNRNPH3 PE=1 SV=2	16	4	8	4	36.9	HNRNPH3	3.37585e+06	1.14825e+06	2.26205e+06	6.70858e+06	4.95396e+06	5.83127e+06	3.33071e+06	2.57944e+06	2.95507e+06	3.56922e+06	693026
High	Master Protein	P24534	Elongation factor 1-beta OS=Homo sapiens OX=9606 GN=EEF1B2 PE=1 SV=3	11	2	8	2	24.7	EEF1B2	5.26912e+06	2.01582e+06	3.64247e+06	10568585	6.75435e+06	8.66147e+06	4.52148e+06	8.82718e+06	6.67433e+06	5.01899e+06	3.03186e+06
High	Master Protein	P60510	Serine/threonine-protein phosphatase 4 catalytic subunit OS=Homo sapiens OX=9606 GN=PPP4C PE=1 SV=1	8	3	8	1	35.1	PPP4C			#DIV/0!	1.19281e+06	572922	882868	538134	691716	614925	#DIV/0!	#DIV/0!
High	Master Protein	Q86YV9	BLOC-2 complex member HPS6 OS=Homo sapiens OX=9606 GN=HPS6 PE=1 SV=1	4	2	8	2	82.9	HPS6			#DIV/0!	3.48572e+06	3.18878e+06	3.33725e+06	2.42279e+06	2.91229e+06	2.66754e+06	#DIV/0!	#DIV/0!
High	Master Protein	Q9NYK5	Large ribosomal subunit protein mL39 OS=Homo sapiens OX=9606 GN=MRPL39 PE=1 SV=3	12	3	8	3	38.7	MRPL39	932935	1.09944e+06	1.01619e+06	5075077	3804658	4.43987e+06	3.08349e+06	4.11652e+06	3.60001e+06	3.42368e+06	2.58382e+06
High	Master Protein	Q8NBN7	Retinol dehydrogenase 13 OS=Homo sapiens OX=9606 GN=RDH13 PE=1 SV=2	11	2	8	2	35.9	RDH13	285078	221545	253312	2.24576e+06	1.57764e+06	1.9117e+06	1.28539e+06	1.43543e+06	1.36041e+06	1.65839e+06	1.10709e+06
High	Master Protein	Q6YN16	Hydroxysteroid dehydrogenase-like protein 2 OS=Homo sapiens OX=9606 GN=HSDL2 PE=1 SV=1	14	4	8	4	45.4	HSDL2	531944	393127	462535	4.87217e+06	4.20864e+06	4.5404e+06	4.10052e+06	4.53094e+06	4.31573e+06	4.07787e+06	3.85319e+06
High	Master Protein	Q5TAQ9	DDB1- and CUL4-associated factor 8 OS=Homo sapiens OX=9606 GN=DCAF8 PE=1 SV=1	5	3	8	3	66.8	DCAF8		347138	347138	4.25335e+06	4.0907e+06	4.17202e+06	5.06314e+06	5.14761e+06	5.10538e+06	3.82488e+06	4.75824e+06
High	Master Protein	P68431	Histone H3.1 OS=Homo sapiens OX=9606 GN=H3C1 PE=1 SV=2	13	3	8	3	15.4	H3C1; H3C10; H3C11; H3C12; H3C2; H3C3; H3C4; H3C6; H3C7; H3C8	1.18647e+07	1.08616e+07	1.13631e+07	2.11504e+07	18811117	1.99808e+07	1.68457e+07	16616058	1.67309e+07	8.61764e+06	5.36776e+06
High	Master Protein	O00213	Amyloid beta precursor protein binding family B member 1 OS=Homo sapiens OX=9606 GN=APBB1 PE=1 SV=2	10	5	8	5	77.2	APBB1	356641	415680	386161	3.65827e+06	2.47709e+06	3.06768e+06	2.85787e+06	3.36645e+06	3.11216e+06	2.68152e+06	2.726e+06
High	Master Protein	P29590	Protein PML OS=Homo sapiens OX=9606 GN=PML PE=1 SV=3	6	5	8	5	97.5	PML	146580	353431	250006	4.02515e+06	5.98962e+06	5.00739e+06	3.41716e+06	4.1052e+06	3.76118e+06	4.75738e+06	3.51117e+06
High	Master Protein	Q9HDC9	Adipocyte plasma membrane-associated protein OS=Homo sapiens OX=9606 GN=APMAP PE=1 SV=2	12	5	8	5	46.5	APMAP	102774		102774	4712530	1.18935e+06	2.95094e+06	2.36118e+06	1.63055e+06	1.99586e+06	2.84816e+06	1.89309e+06
High	Master Protein	P49768	Presenilin-1 OS=Homo sapiens OX=9606 GN=PSEN1 PE=1 SV=1	9	3	8	1	52.6	PSEN1			#DIV/0!	3.46944e+06	2.04748e+06	2.75846e+06	1.87616e+06	1919684	1.89792e+06	#DIV/0!	#DIV/0!
High	Master Protein	Q9BS26	Endoplasmic reticulum resident protein 44 OS=Homo sapiens OX=9606 GN=ERP44 PE=1 SV=1	10	4	8	4	46.9	ERP44	1028705	986951	1.00783e+06	5.28132e+06	8534187	6.90775e+06	6.83954e+06	8.10248e+06	7.47101e+06	5.89993e+06	6.46318e+06
High	Master Protein	Q66K14	TBC1 domain family member 9B OS=Homo sapiens OX=9606 GN=TBC1D9B PE=1 SV=3	8	6	8	6	140.4	TBC1D9B	331768		331768	4.56949e+06	3.52912e+06	4.04931e+06	2.51413e+06	3.15888e+06	2.83651e+06	3.71754e+06	2.50474e+06
High	Master Protein	Q15054	DNA polymerase delta subunit 3 OS=Homo sapiens OX=9606 GN=POLD3 PE=1 SV=2	8	3	8	3	51.4	POLD3	761796	202316	482056	4.24902e+06	4.27871e+06	4.26387e+06	3.81353e+06	4.28522e+06	4.04937e+06	3.78181e+06	3.56732e+06
High	Master Protein	P49406	Large ribosomal subunit protein bL19m OS=Homo sapiens OX=9606 GN=MRPL19 PE=1 SV=2	10	3	8	3	33.5	MRPL19	211532	178581	195057	4.68729e+06	2.89548e+06	3.79139e+06	2.36618e+06	3.41521e+06	2.89069e+06	3.59633e+06	2.69564e+06
High	Master Protein	Q9NZB2	Constitutive coactivator of PPAR-gamma-like protein 1 OS=Homo sapiens OX=9606 GN=FAM120A PE=1 SV=2	3	2	8	2	121.8	FAM120A	177618		177618	469793	381932	425863	298724	292098	295411	248245	117794
High	Master Protein	Q9UHR6	Zinc finger HIT domain-containing protein 2 OS=Homo sapiens OX=9606 GN=ZNHIT2 PE=1 SV=1	13	3	8	3	42.9	ZNHIT2	161389	152137	156763	4.12764e+06	3.04225e+06	3.58494e+06	2.52723e+06	2.9753e+06	2.75126e+06	3.42818e+06	2.5945e+06
High	Master Protein	Q9ULH0	Kinase D-interacting substrate of 220 kDa OS=Homo sapiens OX=9606 GN=KIDINS220 PE=1 SV=3	1	2	8	2	196.4	KIDINS220			#DIV/0!	851555	2.66964e+06	1.7606e+06	1.61516e+06	448487	1.03182e+06	#DIV/0!	#DIV/0!
High	Master Protein	P22694	cAMP-dependent protein kinase catalytic subunit beta OS=Homo sapiens OX=9606 GN=PRKACB PE=1 SV=2	6	2	8	1	40.6	PRKACB	188066	139725	163896	1.53968e+06	936507	1.23809e+06	544771	1.29465e+06	919711	1.0742e+06	755815
High	Master Protein	Q8NFH3	Nucleoporin Nup43 OS=Homo sapiens OX=9606 GN=NUP43 PE=1 SV=1	8	2	8	2	42.1	NUP43	1.34312e+06	608138	975631	2693897	2.52545e+06	2.60967e+06	4.40295e+06	4.64196e+06	4.52246e+06	1.63404e+06	3.54683e+06
High	Master Protein	P36551	Oxygen-dependent coproporphyrinogen-III oxidase, mitochondrial OS=Homo sapiens OX=9606 GN=CPOX PE=1 SV=3	9	4	8	4	50.1	CPOX	1.10273e+06	865029	983881	5.2368e+06	3.25584e+06	4.24632e+06	2.46425e+06	4.32246e+06	3.39336e+06	3.26244e+06	2.40948e+06
High	Master Protein	Q2VPB7	AP-5 complex subunit beta-1 OS=Homo sapiens OX=9606 GN=AP5B1 PE=1 SV=4	6	4	8	4	93.9	AP5B1		23033.5	23033.5	1.71514e+06	1.05653e+06	1.38584e+06	1.11026e+06	1.38985e+06	1.25006e+06	1.3628e+06	1.22702e+06
High	Master Protein	P54105	Methylosome subunit pICln OS=Homo sapiens OX=9606 GN=CLNS1A PE=1 SV=1	29	3	8	3	26.2	CLNS1A		1.38335e+06	1.38335e+06	46955872	17747114	32351493	1.1665e+07	1.42515e+07	1.29583e+07	3.09681e+07	1.15749e+07
High	Master Protein	O60701	UDP-glucose 6-dehydrogenase OS=Homo sapiens OX=9606 GN=UGDH PE=1 SV=1	4	2	8	2	55	UGDH	374018	254344	314181	3.28028e+06	3.22683e+06	3.25355e+06	2.155e+06	2.68372e+06	2.41936e+06	2.93937e+06	2.10517e+06
High	Master Protein	O75400	Pre-mRNA-processing factor 40 homolog A OS=Homo sapiens OX=9606 GN=PRPF40A PE=1 SV=2	3	3	8	3	108.7	PRPF40A	239063	185116	212090	3.15667e+06	1.79994e+06	2.4783e+06	1.77389e+06	1.84533e+06	1.80961e+06	2.26621e+06	1.59752e+06
High	Master Protein	Q96J01	THO complex subunit 3 OS=Homo sapiens OX=9606 GN=THOC3 PE=1 SV=1	8	3	8	3	38.7	THOC3	1.65763e+06	1.03541e+06	1.34652e+06	7.77529e+06	6.83812e+06	7.30671e+06	5.22942e+06	7.05281e+06	6.14111e+06	5.96019e+06	4.79459e+06
High	Master Protein	Q7KZF4	Staphylococcal nuclease domain-containing protein 1 OS=Homo sapiens OX=9606 GN=SND1 PE=1 SV=1	6	4	8	4	101.9	SND1	9.02686e+06	6.43137e+06	7.72911e+06	3.5092e+06	3.06633e+06	3.28777e+06	1.20073e+06	2.18665e+06	1.69369e+06	-4.44135e+06	-6.03543e+06
High	Master Protein	P29966	Myristoylated alanine-rich C-kinase substrate OS=Homo sapiens OX=9606 GN=MARCKS PE=1 SV=4	10	2	8	2	31.5	MARCKS	483493	184997	334245	2.74354e+06	1.40881e+06	2.07617e+06	1.03794e+06	1.09909e+06	1.06851e+06	1.74193e+06	734268
High	Master Protein	O94766	Galactosylgalactosylxylosylprotein 3-beta-glucuronosyltransferase 3 OS=Homo sapiens OX=9606 GN=B3GAT3 PE=1 SV=2	13	4	8	4	37.1	B3GAT3			#DIV/0!	5.23824e+06	4.37008e+06	4.80416e+06	4.03223e+06	4.63402e+06	4.33312e+06	#DIV/0!	#DIV/0!
High	Master Protein	Q29RF7	Sister chromatid cohesion protein PDS5 homolog A OS=Homo sapiens OX=9606 GN=PDS5A PE=1 SV=1	7	6	8	5	150.7	PDS5A		134838	134838	2.82601e+06	2.15517e+06	2.49059e+06	1.37563e+06	1.56981e+06	1.47272e+06	2.35575e+06	1.33788e+06
High	Master Protein	P04181	Ornithine aminotransferase, mitochondrial OS=Homo sapiens OX=9606 GN=OAT PE=1 SV=1	11	3	8	3	48.5	OAT	2.65783e+06	2.76273e+06	2.71028e+06	8.77539e+06	6.59917e+06	7.68728e+06	5.72662e+06	5.38808e+06	5.55735e+06	4.977e+06	2.84707e+06
High	Master Protein	O95772	STARD3 N-terminal-like protein OS=Homo sapiens OX=9606 GN=STARD3NL PE=1 SV=1	20	3	7	3	26.6	STARD3NL	253815		253815	1.04442e+07	5.66839e+06	8.05628e+06	5.87893e+06	7.17363e+06	6.52628e+06	7.80247e+06	6.27246e+06
High	Master Protein	Q99729	Heterogeneous nuclear ribonucleoprotein A/B OS=Homo sapiens OX=9606 GN=HNRNPAB PE=1 SV=2	6	2	7	2	36.2	HNRNPAB	509907	328214	419061	2.97719e+06	2.03952e+06	2.50836e+06	1.36942e+06	1.98328e+06	1.67635e+06	2.0893e+06	1.25729e+06
High	Master Protein	P13473	Lysosome-associated membrane glycoprotein 2 OS=Homo sapiens OX=9606 GN=LAMP2 PE=1 SV=2	4	2	7	2	44.9	LAMP2	2.45247e+06	2.6584e+06	2.55544e+06	4.10963e+07	4.07481e+07	4.09222e+07	3.98689e+07	4.81667e+07	4.40178e+07	3.83668e+07	4.14624e+07
High	Master Protein	P43304	Glycerol-3-phosphate dehydrogenase, mitochondrial OS=Homo sapiens OX=9606 GN=GPD2 PE=1 SV=3	6	4	7	4	80.8	GPD2	81599.5		81599.5	2.05144e+06	1.96818e+06	2.00981e+06	2.71943e+06	2.5081e+06	2.61377e+06	1.92821e+06	2.53217e+06
High	Master Protein	Q8IY67	Ribonucleoprotein PTB-binding 1 OS=Homo sapiens OX=9606 GN=RAVER1 PE=1 SV=1	5	2	7	2	63.8	RAVER1	201138	167311	184224	761993	707688	734840	532311	407555	469933	550616	285709
High	Master Protein	P58107	Epiplakin OS=Homo sapiens OX=9606 GN=EPPK1 PE=1 SV=3	0	2	7	1	555.3	EPPK1			#DIV/0!	2.50965e+06	1.83025e+06	2.16995e+06	1.14479e+06	1.69815e+06	1.42147e+06	#DIV/0!	#DIV/0!
High	Master Protein	Q8IZH2	5'-3' exoribonuclease 1 OS=Homo sapiens OX=9606 GN=XRN1 PE=1 SV=1	1	2	7	2	194	XRN1	372157	670353	521255	2.1847e+06	1.64557e+06	1.91514e+06	1.14337e+06	982011	1.06269e+06	1.39388e+06	541437
High	Master Protein	A4D1U4	DENN domain-containing protein 11 OS=Homo sapiens OX=9606 GN=DENND11 PE=1 SV=1	7	3	7	3	51.4	DENND11			#DIV/0!	5.80389e+06	4.64362e+06	5.22375e+06	4.40539e+06	5.66318e+06	5.03429e+06	#DIV/0!	#DIV/0!
High	Master Protein	Q13315	Serine-protein kinase ATM OS=Homo sapiens OX=9606 GN=ATM PE=1 SV=4	2	4	7	4	350.5	ATM			#DIV/0!	4.03863e+06	3.272e+06	3.65531e+06	1.784e+06	1.59619e+06	1.69009e+06	#DIV/0!	#DIV/0!
High	Master Protein	P00390	Glutathione reductase, mitochondrial OS=Homo sapiens OX=9606 GN=GSR PE=1 SV=2	4	2	7	2	56.2	GSR	1.55256e+06	793189	1.17287e+06	3.94425e+06	3.93167e+06	3.93796e+06	3.31667e+06	2828573	3.07262e+06	2.76509e+06	1.89975e+06
High	Master Protein	Q9Y3Z3	Deoxynucleoside triphosphate triphosphohydrolase SAMHD1 OS=Homo sapiens OX=9606 GN=SAMHD1 PE=1 SV=2	8	4	7	4	72.2	SAMHD1	318631	261816	290224	3.38555e+06	2.95211e+06	3.16883e+06	2.03454e+06	2.19939e+06	2.11697e+06	2.87861e+06	1.82675e+06
High	Master Protein	O95793	Double-stranded RNA-binding protein Staufen homolog 1 OS=Homo sapiens OX=9606 GN=STAU1 PE=1 SV=2	5	2	7	2	63.1	STAU1	2.83157e+06	1.38586e+06	2.10871e+06	157884	1.71335e+06	935618	1.35944e+06	1.52365e+06	1.44154e+06	-1.17309e+06	-667169
High	Master Protein	Q9H3N1	Thioredoxin-related transmembrane protein 1 OS=Homo sapiens OX=9606 GN=TMX1 PE=1 SV=1	8	2	7	2	31.8	TMX1		913539	913539	1.48819e+08	176558534	1.62689e+08	176030475	183101715	179566095	1.61775e+08	1.78653e+08
High	Master Protein	Q14CZ7	FAST kinase domain-containing protein 3, mitochondrial OS=Homo sapiens OX=9606 GN=FASTKD3 PE=1 SV=2	4	3	7	3	75.6	FASTKD3			#DIV/0!	5437805	5071118	5.25446e+06	3.73341e+06	3.97671e+06	3.85506e+06	#DIV/0!	#DIV/0!
High	Master Protein	Q9UL15	BAG family molecular chaperone regulator 5 OS=Homo sapiens OX=9606 GN=BAG5 PE=1 SV=1	14	4	7	4	51.2	BAG5			#DIV/0!	2.51359e+06	2.37581e+06	2.4447e+06	2.37926e+06	2.10551e+06	2.24239e+06	#DIV/0!	#DIV/0!
High	Master Protein	Q9NSD9	Phenylalanine--tRNA ligase beta subunit OS=Homo sapiens OX=9606 GN=FARSB PE=1 SV=3	5	3	7	3	66.1	FARSB	720701	922696	821699	2.25472e+06	2.27887e+06	2.2668e+06	1.78896e+06	1.89828e+06	1.84362e+06	1.4451e+06	1.02192e+06
High	Master Protein	Q9H3K6	BolA-like protein 2 OS=Homo sapiens OX=9606 GN=BOLA2 PE=1 SV=1	19	2	7	2	10.1	BOLA2; BOLA2B	3.20771e+06	1.94876e+06	2.57824e+06	6.70465e+06	4.64474e+06	5674692	4.29482e+06	4.77527e+06	4.53505e+06	3.09646e+06	1.95681e+06
High	Master Protein	Q9Y2H1	Serine/threonine-protein kinase 38-like OS=Homo sapiens OX=9606 GN=STK38L PE=1 SV=3	5	3	7	2	54	STK38L			#DIV/0!	2.91927e+06	2.67586e+06	2.79756e+06	1.31575e+06	1.68812e+06	1.50193e+06	#DIV/0!	#DIV/0!
High	Master Protein	Q15118	[Pyruvate dehydrogenase (acetyl-transferring)] kinase isozyme 1, mitochondrial OS=Homo sapiens OX=9606 GN=PDK1 PE=1 SV=1	8	3	7	3	49.2	PDK1	302793	698199	500496	4.52533e+06	3.709e+06	4.11717e+06	2.15898e+06	2.79661e+06	2.47779e+06	3.61667e+06	1.9773e+06
High	Master Protein	Q92522	Histone H1.10 OS=Homo sapiens OX=9606 GN=H1-10 PE=1 SV=1	13	2	7	2	22.5	H1-10			#DIV/0!	2.82024e+06	3.18686e+06	3.00355e+06	1.13424e+06	3.34515e+06	2.2397e+06	#DIV/0!	#DIV/0!
High	Master Protein	O95400	CD2 antigen cytoplasmic tail-binding protein 2 OS=Homo sapiens OX=9606 GN=CD2BP2 PE=1 SV=1	18	4	7	4	37.6	CD2BP2	149047		149047	4.23395e+06	3.76593e+06	3.99994e+06	4.31114e+06	5.28712e+06	4.79913e+06	3.85089e+06	4.65008e+06
High	Master Protein	Q9HBH5	Retinol dehydrogenase 14 OS=Homo sapiens OX=9606 GN=RDH14 PE=1 SV=1	10	3	7	3	36.8	RDH14			#DIV/0!	4.00288e+06	2.97427e+06	3.48858e+06	2.61577e+06	3.61865e+06	3.11721e+06	#DIV/0!	#DIV/0!
High	Master Protein	Q8WUK0	Phosphatidylglycerophosphatase and protein-tyrosine phosphatase 1 OS=Homo sapiens OX=9606 GN=PTPMT1 PE=1 SV=1	11	2	7	2	22.8	PTPMT1			#DIV/0!	6.95675e+06	4054519	5.50564e+06	4.83311e+06	4.83324e+06	4.83317e+06	#DIV/0!	#DIV/0!
High	Master Protein	Q9C0D9	Ethanolaminephosphotransferase 1 OS=Homo sapiens OX=9606 GN=SELENOI PE=1 SV=3	9	2	7	2	45.2	SELENOI			#DIV/0!	1.34874e+07	7.66008e+06	1.05737e+07	5.87915e+06	6.73665e+06	6.3079e+06	#DIV/0!	#DIV/0!
High	Master Protein	Q9UBV8	Peflin OS=Homo sapiens OX=9606 GN=PEF1 PE=1 SV=1	8	2	7	2	30.4	PEF1	147573	151733	149653	1.02048e+06	849960	935217	657608	1.12007e+06	888838	785564	739185
High	Master Protein	Q9NSG2	FIGNL1-interacting regulator of recombination and mitosis OS=Homo sapiens OX=9606 GN=FIRRM PE=1 SV=1	4	2	7	2	96.5	FIRRM			#DIV/0!	4.80879e+06	3.52864e+06	4.16871e+06	3.14112e+06	2.49223e+06	2.81667e+06	#DIV/0!	#DIV/0!
High	Master Protein	Q99496	E3 ubiquitin-protein ligase RING2 OS=Homo sapiens OX=9606 GN=RNF2 PE=1 SV=1	9	2	7	2	37.6	RNF2	1.59888e+06	320776	959826	2.3905e+06	3.14289e+06	2.7667e+06	1.15395e+06	1.15258e+06	1.15327e+06	1.80687e+06	193443
High	Master Protein	Q92692	Nectin-2 OS=Homo sapiens OX=9606 GN=NECTIN2 PE=1 SV=1	3	2	7	2	57.7	NECTIN2	186485	160320	173402	1.98968e+06	2.03179e+06	2.01074e+06	2.08013e+06	2.02963e+06	2.05488e+06	1.83734e+06	1.88148e+06
High	Master Protein	Q9Y490	Talin-1 OS=Homo sapiens OX=9606 GN=TLN1 PE=1 SV=3	2	3	7	3	269.6	TLN1	1.07954e+06	851162	965349	864029	737986	801007	595017	1.0233e+06	809160	-164341	-156189
High	Master Protein	Q96E22	Dehydrodolichyl diphosphate synthase complex subunit NUS1 OS=Homo sapiens OX=9606 GN=NUS1 PE=1 SV=1	18	3	7	3	33.2	NUS1			#DIV/0!	1.5339e+06	960862	1.24738e+06	623503	846213	734858	#DIV/0!	#DIV/0!
High	Master Protein	Q16877	6-phosphofructo-2-kinase/fructose-2,6-bisphosphatase 4 OS=Homo sapiens OX=9606 GN=PFKFB4 PE=1 SV=6	6	3	7	1	54	PFKFB4	767071	250813	508942	8.32383e+06	6.44575e+06	7.38479e+06	5.64511e+06	6.1129e+06	5.879e+06	6.87585e+06	5.37006e+06
High	Master Protein	Q96AG4	Leucine-rich repeat-containing protein 59 OS=Homo sapiens OX=9606 GN=LRRC59 PE=1 SV=1	13	3	7	3	34.9	LRRC59	806750		806750	6.8408e+06	4.98488e+06	5.91284e+06	3.18969e+06	6464623	4.82716e+06	5.10609e+06	4.02041e+06
High	Master Protein	Q12904	Aminoacyl tRNA synthase complex-interacting multifunctional protein 1 OS=Homo sapiens OX=9606 GN=AIMP1 PE=1 SV=2	24	5	7	5	34.3	AIMP1	6.09448e+06	3.67376e+06	4.88412e+06	9.71023e+06	5.24197e+06	7.4761e+06	4.02532e+06	7.16843e+06	5.59687e+06	2.59198e+06	712755
High	Master Protein	P0C7P4	Putative cytochrome b-c1 complex subunit Rieske-like protein 1 OS=Homo sapiens OX=9606 GN=UQCRFS1P1 PE=5 SV=1	13	3	7	3	30.8	UQCRFS1P1	151637	241203	196420	2163543	1.43383e+06	1.79868e+06	1.6875e+06	2.95522e+06	2.32136e+06	1.60226e+06	2.12494e+06
High	Master Protein	Q9Y3D8	Adenylate kinase isoenzyme 6 OS=Homo sapiens OX=9606 GN=AK6 PE=1 SV=1	20	3	7	3	20	AK6			#DIV/0!	4.38266e+06	3.02342e+06	3.70304e+06	2.67136e+06	3.53678e+06	3.10407e+06	#DIV/0!	#DIV/0!
High	Master Protein	Q15345	Leucine-rich repeat-containing protein 41 OS=Homo sapiens OX=9606 GN=LRRC41 PE=1 SV=3	7	3	7	3	88.6	LRRC41			#DIV/0!	1.61102e+06	1.56027e+06	1.58565e+06	2.00057e+06	1.49222e+06	1.7464e+06	#DIV/0!	#DIV/0!
High	Master Protein	O00258	Guided entry of tail-anchored proteins factor 1 OS=Homo sapiens OX=9606 GN=GET1 PE=1 SV=2	18	4	7	4	19.8	GET1		55289.7	55289.7	6.89796e+06	4.86835e+06	5.88316e+06	4.23035e+06	4.74673e+06	4.48854e+06	5.82787e+06	4.43325e+06
High	Master Protein	P49321	Nuclear autoantigenic sperm protein OS=Homo sapiens OX=9606 GN=NASP PE=1 SV=2	4	3	7	3	85.2	NASP	984282	581833	783057	161860	2.29533e+06	1.2286e+06	1.62848e+06	1.84296e+06	1.73572e+06	445538	952663
High	Master Protein	P49959	Double-strand break repair protein MRE11 OS=Homo sapiens OX=9606 GN=MRE11 PE=1 SV=3	8	5	7	5	80.5	MRE11	1.47844e+06	1.29334e+06	1.38589e+06	4.70233e+06	5.50213e+06	5.10223e+06	4.63234e+06	5.4847e+06	5.05852e+06	3.71634e+06	3.67263e+06
High	Master Protein	Q8IWU2	Serine/threonine-protein kinase LMTK2 OS=Homo sapiens OX=9606 GN=LMTK2 PE=1 SV=2	3	4	7	4	164.8	LMTK2	2639683	1.80316e+06	2.22142e+06	2.75346e+06	2.45214e+06	2602798	1.22164e+06	1.7338e+06	1.47772e+06	381378	-743700
High	Master Protein	O15321	Transmembrane 9 superfamily member 1 OS=Homo sapiens OX=9606 GN=TM9SF1 PE=2 SV=2	3	2	7	2	68.8	TM9SF1		125955	125955	4.70235e+06	3528349	4.11535e+06	2.95637e+06	3.05588e+06	3.00612e+06	3.98939e+06	2.88017e+06
High	Master Protein	Q8NCH0	Carbohydrate sulfotransferase 14 OS=Homo sapiens OX=9606 GN=CHST14 PE=1 SV=2	8	3	7	3	43	CHST14	431586		431586	2.68875e+06	1.8286e+06	2.25868e+06	1.73294e+06	1.99294e+06	1.86294e+06	1.82709e+06	1.43136e+06
High	Master Protein	Q9P2X0	Dolichol-phosphate mannosyltransferase subunit 3 OS=Homo sapiens OX=9606 GN=DPM3 PE=1 SV=2	24	2	7	2	10.1	DPM3			#DIV/0!	4.44137e+06	4.70554e+06	4.57346e+06	3.9142e+06	4.45499e+06	4.1846e+06	#DIV/0!	#DIV/0!
High	Master Protein	Q96K37	Solute carrier family 35 member E1 OS=Homo sapiens OX=9606 GN=SLC35E1 PE=1 SV=2	6	2	7	2	44.7	SLC35E1			#DIV/0!	7.13237e+06	3.76503e+06	5.4487e+06	4.55929e+06	3.18782e+06	3.87355e+06	#DIV/0!	#DIV/0!
High	Master Protein	P29401	Transketolase OS=Homo sapiens OX=9606 GN=TKT PE=1 SV=3	6	4	7	4	67.8	TKT	1.76121e+06	1.30624e+06	1.53372e+06	4.11624e+06	5.45065e+06	4.78344e+06	2.7983e+06	3.03499e+06	2.91665e+06	3.24972e+06	1.38293e+06
High	Master Protein	Q9BV68	E3 ubiquitin-protein ligase RNF126 OS=Homo sapiens OX=9606 GN=RNF126 PE=1 SV=2	17	3	7	3	33.8	RNF126	461157		461157	2.56606e+06	1.00015e+07	6.28377e+06	6.70329e+06	7.72905e+06	7.21617e+06	5.82261e+06	6.75501e+06
High	Master Protein	P84098	Large ribosomal subunit protein eL19 OS=Homo sapiens OX=9606 GN=RPL19 PE=1 SV=1	17	3	7	3	23.5	RPL19	7.02744e+06	3.87681e+06	5.45213e+06	1.13924e+07	8.27406e+06	9.83323e+06	5.54282e+06	1.19581e+07	8.75048e+06	4.3811e+06	3.29836e+06
High	Master Protein	P60228	Eukaryotic translation initiation factor 3 subunit E OS=Homo sapiens OX=9606 GN=EIF3E PE=1 SV=1	13	5	7	5	52.2	EIF3E	1.07839e+07	6.49538e+06	8.63964e+06	1.0607e+07	8.39274e+06	9.49985e+06	6.21931e+06	4.95951e+06	5.58941e+06	860211	-3.05023e+06
High	Master Protein	Q9NWZ8	Gem-associated protein 8 OS=Homo sapiens OX=9606 GN=GEMIN8 PE=1 SV=1	10	3	7	3	28.6	GEMIN8	164431	244886	204658	6.42666e+06	4.33248e+06	5379569	3.30766e+06	5.34496e+06	4.32631e+06	5.17491e+06	4.12165e+06
High	Master Protein	Q14232	Translation initiation factor eIF-2B subunit alpha OS=Homo sapiens OX=9606 GN=EIF2B1 PE=1 SV=1	18	5	7	5	33.7	EIF2B1	522929	228006	375468	8.57366e+06	5.63809e+06	7.10588e+06	3.79609e+06	6.39477e+06	5.09543e+06	6.73041e+06	4.71996e+06
High	Master Protein	Q8TD19	Serine/threonine-protein kinase Nek9 OS=Homo sapiens OX=9606 GN=NEK9 PE=1 SV=2	5	3	7	3	107.1	NEK9	178572	223417	200995	1.70638e+06	1.442e+06	1.57419e+06	2.44067e+06	2.67e+06	2.55533e+06	1.3732e+06	2.35434e+06
High	Master Protein	Q9UQ35	Serine/arginine repetitive matrix protein 2 OS=Homo sapiens OX=9606 GN=SRRM2 PE=1 SV=2	1	3	7	3	299.4	SRRM2	533583	537564	535574	3.75697e+06	3.35949e+06	3.55823e+06	2.22686e+06	2.3966e+06	2.31173e+06	3.02266e+06	1.77616e+06
High	Master Protein	P62899	Large ribosomal subunit protein eL31 OS=Homo sapiens OX=9606 GN=RPL31 PE=1 SV=1	26	3	7	3	14.5	RPL31	263142	348756	305949	9.29259e+06	9.23914e+06	9.26586e+06	7.30144e+06	6.60926e+06	6.95535e+06	8.95992e+06	6.6494e+06
High	Master Protein	Q09666	Neuroblast differentiation-associated protein AHNAK OS=Homo sapiens OX=9606 GN=AHNAK PE=1 SV=2	3	2	7	2	628.7	AHNAK	2.43673e+06	2.4542e+06	2.44547e+06	959387	606105	782746			#DIV/0!	-1.66272e+06	#DIV/0!
High	Master Protein	P34932	Heat shock 70 kDa protein 4 OS=Homo sapiens OX=9606 GN=HSPA4 PE=1 SV=4	7	4	7	3	94.3	HSPA4	1.19484e+06	489878	842358	7.00691e+06	3.50542e+06	5.25617e+06	4.03197e+06	2.83651e+06	3.43424e+06	4.41381e+06	2.59188e+06
High	Master Protein	P43007	Neutral amino acid transporter A OS=Homo sapiens OX=9606 GN=SLC1A4 PE=1 SV=1	7	3	7	2	55.7	SLC1A4			#DIV/0!	3.68199e+06	2.30781e+06	2.9949e+06	2.92003e+06	2.89737e+06	2.9087e+06	#DIV/0!	#DIV/0!
High	Master Protein	P56282	DNA polymerase epsilon subunit 2 OS=Homo sapiens OX=9606 GN=POLE2 PE=1 SV=2	11	3	7	3	59.5	POLE2		381198	381198	4.00667e+06	2.71824e+06	3.36246e+06	1.95041e+06	2.34868e+06	2.14955e+06	2.98126e+06	1.76835e+06
High	Master Protein	P19623	Spermidine synthase OS=Homo sapiens OX=9606 GN=SRM PE=1 SV=1	6	2	7	2	33.8	SRM	1.08454e+06	628883	856714	3.89547e+06	3.05956e+06	3.47752e+06	3.12054e+06	3.6609e+06	3.39072e+06	2.6208e+06	2.53401e+06
High	Master Protein	Q9NUQ8	ATP-binding cassette sub-family F member 3 OS=Homo sapiens OX=9606 GN=ABCF3 PE=1 SV=2	8	4	7	4	79.7	ABCF3	373102	414941	394021	1.58331e+06	1.30504e+06	1.44417e+06	1.23135e+06	1.55001e+06	1.39068e+06	1.05015e+06	996662
High	Master Protein	Q08945	FACT complex subunit SSRP1 OS=Homo sapiens OX=9606 GN=SSRP1 PE=1 SV=1	6	4	7	4	81	SSRP1	459702	537941	498822	4.28525e+06	2.8322e+06	3.55873e+06	3.80656e+06	3.88625e+06	3.8464e+06	3.05991e+06	3.34758e+06
High	Master Protein	Q96BI1	Solute carrier family 22 member 18 OS=Homo sapiens OX=9606 GN=SLC22A18 PE=1 SV=3	7	3	7	3	44.8	SLC22A18	448448	240732	344590	3.85697e+06	3.32691e+06	3.59194e+06	2.72105e+06	2.46325e+06	2.59215e+06	3.24735e+06	2.24756e+06
High	Master Protein	Q9H3K2	Growth hormone-inducible transmembrane protein OS=Homo sapiens OX=9606 GN=GHITM PE=1 SV=2	10	3	7	3	37.2	GHITM	396241	300983	348612	4.98127e+06	3.8643e+06	4.42278e+06	1.64331e+06	2.36667e+06	2.00499e+06	4.07417e+06	1.65638e+06
High	Master Protein	Q9NWS8	Required for meiotic nuclear division protein 1 homolog OS=Homo sapiens OX=9606 GN=RMND1 PE=1 SV=2	4	2	7	2	51.6	RMND1		64011.6	64011.6	5.13722e+06	3.22591e+06	4.18157e+06	3.13739e+06	5.06249e+06	4.09994e+06	4.11756e+06	4.03593e+06
High	Master Protein	Q9UK73	Protein fem-1 homolog B OS=Homo sapiens OX=9606 GN=FEM1B PE=1 SV=1	6	3	7	3	70.2	FEM1B			#DIV/0!	1.14655e+06	1.16621e+06	1.15638e+06	1.09103e+06	980417	1.03572e+06	#DIV/0!	#DIV/0!
High	Master Protein	Q6UX07	Dehydrogenase/reductase SDR family member 13 OS=Homo sapiens OX=9606 GN=DHRS13 PE=2 SV=1	8	3	7	3	40.8	DHRS13		155997	155997	2.66726e+06	3.11743e+06	2.89234e+06	1.88407e+06	2.10301e+06	1.99354e+06	2.73635e+06	1.83755e+06
High	Master Protein	Q07666	KH domain-containing, RNA-binding, signal transduction-associated protein 1 OS=Homo sapiens OX=9606 GN=KHDRBS1 PE=1 SV=1	15	5	7	5	48.2	KHDRBS1	1.65174e+06	919890	1.28581e+06	2.59639e+07	1.45727e+07	2.02683e+07	1.61713e+07	1.48876e+07	1.55295e+07	1.89825e+07	1.42436e+07
High	Master Protein	P35573	Glycogen debranching enzyme OS=Homo sapiens OX=9606 GN=AGL PE=1 SV=3	3	4	7	4	174.7	AGL	1.90569e+06	1.66234e+06	1.78401e+06	4.04488e+06	2.13349e+06	3.08919e+06	1.17468e+06	2.36848e+06	1.77158e+06	1.30517e+06	-12433.3
High	Master Protein	P43356	Melanoma-associated antigen 2 OS=Homo sapiens OX=9606 GN=MAGEA2 PE=1 SV=1	7	2	7	2	35	MAGEA2; MAGEA2B			#DIV/0!	2.4624e+06	2.62357e+06	2.54298e+06	2.12975e+06	2.40302e+06	2.26638e+06	#DIV/0!	#DIV/0!
High	Master Protein	Q14669	E3 ubiquitin-protein ligase TRIP12 OS=Homo sapiens OX=9606 GN=TRIP12 PE=1 SV=1	1	2	7	2	220.3	TRIP12		197993	197993	1.20882e+06	712373	960598	367831	836041	601936	762604	403943
High	Master Protein	P04150	Glucocorticoid receptor OS=Homo sapiens OX=9606 GN=NR3C1 PE=1 SV=1	7	4	7	4	85.6	NR3C1			#DIV/0!	5.2442e+06	2.67042e+06	3.95731e+06	858796	2.20103e+06	1.52992e+06	#DIV/0!	#DIV/0!
High	Master Protein	P18074	General transcription and DNA repair factor IIH helicase subunit XPD OS=Homo sapiens OX=9606 GN=ERCC2 PE=1 SV=1	7	3	7	3	86.9	ERCC2		189320	189320	6.28777e+06	1.14295e+06	3.71536e+06	3.48642e+06	3.96437e+06	3.72539e+06	3.52604e+06	3.53607e+06
High	Master Protein	Q13505	Metaxin-1 OS=Homo sapiens OX=9606 GN=MTX1 PE=1 SV=3	8	3	7	3	51.4	MTX1	216438		216438	2.15731e+06	2.09702e+06	2.12717e+06	1587332	706388	1.14686e+06	1.91073e+06	930422
High	Master Protein	P04637	Cellular tumor antigen p53 OS=Homo sapiens OX=9606 GN=TP53 PE=1 SV=4	7	2	7	2	43.6	TP53	1466365	739780	1.10307e+06	5.42034e+06	3937026	4.67868e+06	3.34717e+06	4146105	3.74664e+06	3.57561e+06	2.64356e+06
High	Master Protein	Q10469	Alpha-1,6-mannosyl-glycoprotein 2-beta-N-acetylglucosaminyltransferase OS=Homo sapiens OX=9606 GN=MGAT2 PE=1 SV=1	6	3	7	3	51.5	MGAT2			#DIV/0!	6.11538e+06	5.42364e+06	5.76951e+06	5028019	4.6638e+06	4.84591e+06	#DIV/0!	#DIV/0!
High	Master Protein	Q9GZP9	Derlin-2 OS=Homo sapiens OX=9606 GN=DERL2 PE=1 SV=1	17	2	7	2	27.5	DERL2			#DIV/0!	3.15763e+07	2.23324e+07	2.69544e+07	1.83253e+07	2.21058e+07	20215577	#DIV/0!	#DIV/0!
High	Master Protein	O95232	Luc7-like protein 3 OS=Homo sapiens OX=9606 GN=LUC7L3 PE=1 SV=2	7	2	7	2	51.4	LUC7L3			#DIV/0!	277989	241437	259713	386411	406865	396638	#DIV/0!	#DIV/0!
High	Master Protein	Q9UKZ1	CCR4-NOT transcription complex subunit 11 OS=Homo sapiens OX=9606 GN=CNOT11 PE=1 SV=1	7	2	7	2	55.2	CNOT11	796169	174342	485255	1.70338e+06	1.63371e+06	1.66855e+06	1208933	2.06564e+06	1.63729e+06	1.18329e+06	1.15203e+06
High	Master Protein	Q96CN4	EVI5-like protein OS=Homo sapiens OX=9606 GN=EVI5L PE=1 SV=1	3	2	7	2	91.3	EVI5L			#DIV/0!	2.02237e+06	2553367	2.28787e+06	2.16673e+06	1.9828e+06	2.07476e+06	#DIV/0!	#DIV/0!
High	Master Protein	Q8N8A2	Serine/threonine-protein phosphatase 6 regulatory ankyrin repeat subunit B OS=Homo sapiens OX=9606 GN=ANKRD44 PE=1 SV=3	5	3	7	2	107.5	ANKRD44	76633.5	68622.4	72627.9	468766	337572	403169	311837	344436	328136	330541	255508
High	Master Protein	Q8TBM8	DnaJ homolog subfamily B member 14 OS=Homo sapiens OX=9606 GN=DNAJB14 PE=1 SV=1	11	4	7	4	42.5	DNAJB14			#DIV/0!	4259090	2.03707e+06	3.14808e+06	3.24329e+06	3.31776e+06	3.28052e+06	#DIV/0!	#DIV/0!
High	Master Protein	Q9BUP0	EF-hand domain-containing protein D1 OS=Homo sapiens OX=9606 GN=EFHD1 PE=1 SV=1	15	3	7	2	26.9	EFHD1	328629	182239	255434	1.09974e+06	844466	972103	362562	623819	493190	716669	237756
High	Master Protein	P17612	cAMP-dependent protein kinase catalytic subunit alpha OS=Homo sapiens OX=9606 GN=PRKACA PE=1 SV=2	13	3	7	2	40.6	PRKACA	1839887	275064	1.05748e+06	4025006	2.04519e+06	3.0351e+06	1.75283e+06	2337376	2.0451e+06	1.97762e+06	987628
High	Master Protein	P63010	AP-2 complex subunit beta OS=Homo sapiens OX=9606 GN=AP2B1 PE=1 SV=1	5	4	7	2	104.5	AP2B1	1837532	1.30043e+06	1.56898e+06	2.58408e+06	2.19768e+06	2.39088e+06	1.75553e+06	1.78946e+06	1.7725e+06	821903	203517
High	Master Protein	Q969X5	Endoplasmic reticulum-Golgi intermediate compartment protein 1 OS=Homo sapiens OX=9606 GN=ERGIC1 PE=1 SV=1	19	4	7	4	32.6	ERGIC1	134738		134738	2.02819e+07	1.12419e+07	1.57619e+07	1.15701e+07	1.72385e+07	1.44043e+07	1.56272e+07	1.42695e+07
High	Master Protein	Q7Z7H8	Large ribosomal subunit protein uL10m OS=Homo sapiens OX=9606 GN=MRPL10 PE=1 SV=3	14	3	7	3	29.3	MRPL10	274792		274792	1.93882e+06	1.59296e+06	1.76589e+06	921450	1.41149e+06	1.16647e+06	1.4911e+06	891679
High	Master Protein	Q9NR09	Baculoviral IAP repeat-containing protein 6 OS=Homo sapiens OX=9606 GN=BIRC6 PE=1 SV=3	1	3	7	3	529.9	BIRC6	198457	112534	155496	1.74675e+06	403210	1.07498e+06		713503	713503	919486	558007
High	Master Protein	Q6L8Q7	2',5'-phosphodiesterase 12 OS=Homo sapiens OX=9606 GN=PDE12 PE=1 SV=2	4	2	7	2	67.3	PDE12	382471	234542	308506		1.41029e+06	1.41029e+06	1.08014e+06	1.08362e+06	1.08188e+06	1.10178e+06	773374
High	Master Protein	Q96GX5	Serine/threonine-protein kinase greatwall OS=Homo sapiens OX=9606 GN=MASTL PE=1 SV=1	5	3	7	3	97.3	MASTL			#DIV/0!	1.21073e+06	201029	705881	215411	1.03109e+06	623248	#DIV/0!	#DIV/0!
High	Master Protein	Q969Z0	FAST kinase domain-containing protein 4 OS=Homo sapiens OX=9606 GN=TBRG4 PE=1 SV=1	8	4	7	4	70.7	TBRG4			#DIV/0!	901700	668473	785087	609233	530674	569953	#DIV/0!	#DIV/0!
High	Master Protein	P04920	Anion exchange protein 2 OS=Homo sapiens OX=9606 GN=SLC4A2 PE=1 SV=4	3	3	7	3	136.9	SLC4A2			#DIV/0!	1.34108e+06	929894	1.13549e+06	254239	230385	242312	#DIV/0!	#DIV/0!
High	Master Protein	Q9Y5Z9	UbiA prenyltransferase domain-containing protein 1 OS=Homo sapiens OX=9606 GN=UBIAD1 PE=1 SV=1	6	2	7	2	36.8	UBIAD1	347924	118128	233026	7.60381e+06	6.96184e+06	7.28282e+06	4.07962e+06	4.65481e+06	4.36721e+06	7.0498e+06	4.13419e+06
High	Master Protein	Q9NVE7	4'-phosphopantetheine phosphatase OS=Homo sapiens OX=9606 GN=PANK4 PE=1 SV=1	3	2	7	2	85.9	PANK4	120583		120583	1.95102e+06	1.31138e+06	1.6312e+06	1.08233e+06	1.33209e+06	1.20721e+06	1.51062e+06	1.08663e+06
High	Master Protein	Q15125	3-beta-hydroxysteroid-Delta(8),Delta(7)-isomerase OS=Homo sapiens OX=9606 GN=EBP PE=1 SV=3	10	2	7	2	26.3	EBP		440258	440258	9086837	7.08299e+06	8.08491e+06	5.79798e+06	7.11661e+06	6.4573e+06	7.64466e+06	6.01704e+06
High	Master Protein	Q15120	[Pyruvate dehydrogenase (acetyl-transferring)] kinase isozyme 3, mitochondrial OS=Homo sapiens OX=9606 GN=PDK3 PE=1 SV=1	6	2	7	2	46.9	PDK3	755955	542185	649070	4.34341e+06	4.08632e+06	4.21487e+06	3.13679e+06	4.30933e+06	3.72306e+06	3.5658e+06	3.07399e+06
High	Master Protein	Q9UHX1	Poly(U)-binding-splicing factor PUF60 OS=Homo sapiens OX=9606 GN=PUF60 PE=1 SV=1	10	3	7	3	59.8	PUF60	4.02152e+06	1.68257e+06	2.85205e+06	6.16373e+06	5.8988e+06	6.03127e+06	5.26836e+06	4.82739e+06	5.04788e+06	3.17922e+06	2.19583e+06
High	Master Protein	O60291	E3 ubiquitin-protein ligase MGRN1 OS=Homo sapiens OX=9606 GN=MGRN1 PE=1 SV=2	10	4	7	4	60.7	MGRN1			#DIV/0!	1.80678e+06	1.85654e+06	1.83166e+06	1.5798e+06	1.88382e+06	1.73181e+06	#DIV/0!	#DIV/0!
High	Master Protein	Q32P28	Prolyl 3-hydroxylase 1 OS=Homo sapiens OX=9606 GN=P3H1 PE=1 SV=2	5	3	7	3	83.3	P3H1			#DIV/0!	1380646	1.75959e+06	1.57012e+06	940194	1.03415e+06	987173	#DIV/0!	#DIV/0!
High	Master Protein	Q8TEY7	Ubiquitin carboxyl-terminal hydrolase 33 OS=Homo sapiens OX=9606 GN=USP33 PE=1 SV=2	7	3	7	3	106.7	USP33			#DIV/0!	2.80409e+06	2.38928e+06	2.59669e+06	1.81753e+06	2.17261e+06	1.99507e+06	#DIV/0!	#DIV/0!
High	Master Protein	Q9H840	Gem-associated protein 7 OS=Homo sapiens OX=9606 GN=GEMIN7 PE=1 SV=1	50	3	7	3	14.5	GEMIN7			#DIV/0!	8.21015e+06	7.35194e+06	7.78105e+06	5.56173e+06	7.12916e+06	6345445	#DIV/0!	#DIV/0!
High	Master Protein	Q9Y6G9	Cytoplasmic dynein 1 light intermediate chain 1 OS=Homo sapiens OX=9606 GN=DYNC1LI1 PE=1 SV=3	17	7	7	7	56.5	DYNC1LI1	1.08853e+06	527278	807902	1.44293e+07	1.30842e+07	1.37568e+07	8.21467e+06	9.35415e+06	8.78441e+06	1.29489e+07	7.97651e+06
High	Master Protein	P30049	ATP synthase subunit delta, mitochondrial OS=Homo sapiens OX=9606 GN=ATP5F1D PE=1 SV=2	38	3	7	3	17.5	ATP5F1D	1732870	850129	1.2915e+06	4.07803e+07	2.42725e+07	3.25264e+07	1.42572e+07	1.70762e+07	1.56667e+07	3.12349e+07	1.43752e+07
High	Master Protein	O75600	2-amino-3-ketobutyrate coenzyme A ligase, mitochondrial OS=Homo sapiens OX=9606 GN=GCAT PE=1 SV=1	13	3	7	3	45.3	GCAT	114242	212431	163336	4.19968e+06	3.265e+06	3.73234e+06	2514637	2.57867e+06	2.54665e+06	3.569e+06	2.38332e+06
High	Master Protein	Q6ZNB6	NF-X1-type zinc finger protein NFXL1 OS=Homo sapiens OX=9606 GN=NFXL1 PE=1 SV=2	6	4	7	4	101.3	NFXL1			#DIV/0!	1.73732e+06	1.26154e+06	1.49943e+06	1.29824e+06	1.3733e+06	1.33577e+06	#DIV/0!	#DIV/0!
High	Master Protein	P27797	Calreticulin OS=Homo sapiens OX=9606 GN=CALR PE=1 SV=1	8	3	7	3	48.1	CALR	7.8533e+06	4.67513e+06	6.26421e+06	2.79222e+06	1.8327e+06	2.31246e+06	857917	1.09169e+06	974805	-3.95175e+06	-5.28941e+06
High	Master Protein	Q9UET6	tRNA (cytidine(32)/guanosine(34)-2'-O)-methyltransferase OS=Homo sapiens OX=9606 GN=FTSJ1 PE=1 SV=2	10	2	7	2	36.1	FTSJ1	287285	168882	228084	7.92698e+06	8.2785e+06	8.10274e+06	6.27683e+06	6844234	6.56053e+06	7.87466e+06	6.33245e+06
High	Master Protein	P46940	Ras GTPase-activating-like protein IQGAP1 OS=Homo sapiens OX=9606 GN=IQGAP1 PE=1 SV=1	3	4	7	4	189.1	IQGAP1	436941	438177	437559	1171252	716124	943688	980311	607251	793781	506129	356222
High	Master Protein	Q9BRQ6	MICOS complex subunit MIC25 OS=Homo sapiens OX=9606 GN=CHCHD6 PE=1 SV=1	9	2	7	2	26.4	CHCHD6	995983	719403	857693	5.231e+06	4.05394e+06	4.64247e+06	3.11521e+06	5.36568e+06	4.24044e+06	3.78477e+06	3.38275e+06
High	Master Protein	O94955	Rho-related BTB domain-containing protein 3 OS=Homo sapiens OX=9606 GN=RHOBTB3 PE=1 SV=2	8	4	7	4	69.4	RHOBTB3			#DIV/0!	2.29543e+06	1.97625e+06	2.13584e+06	1.52067e+06	1.59573e+06	1.5582e+06	#DIV/0!	#DIV/0!
High	Master Protein	P60604	Ubiquitin-conjugating enzyme E2 G2 OS=Homo sapiens OX=9606 GN=UBE2G2 PE=1 SV=1	28	2	7	2	18.6	UBE2G2	366087	166887	266487	6.16089e+06	4.69879e+06	5.42984e+06	4.73775e+06	4.15884e+06	4.4483e+06	5.16335e+06	4.18181e+06
High	Master Protein	P25685	DnaJ homolog subfamily B member 1 OS=Homo sapiens OX=9606 GN=DNAJB1 PE=1 SV=4	6	2	7	2	38	DNAJB1	745284	512019	628651	3166090	2.48846e+06	2.82727e+06	3.21101e+06	3.90624e+06	3.55862e+06	2.19862e+06	2.92997e+06
High	Master Protein	Q9Y3D6	Mitochondrial fission 1 protein OS=Homo sapiens OX=9606 GN=FIS1 PE=1 SV=2	18	2	7	2	16.9	FIS1			#DIV/0!	1.50892e+06	834123	1.17152e+06	971904	884309	928107	#DIV/0!	#DIV/0!
High	Master Protein	Q9C0J8	pre-mRNA 3' end processing protein WDR33 OS=Homo sapiens OX=9606 GN=WDR33 PE=1 SV=2	3	3	6	3	145.8	WDR33			#DIV/0!	1.15233e+06	981076	1.0667e+06	604714	714004	659359	#DIV/0!	#DIV/0!
High	Master Protein	P51532	Transcription activator BRG1 OS=Homo sapiens OX=9606 GN=SMARCA4 PE=1 SV=2	3	4	6	4	184.5	SMARCA4	2.02647e+06	2.38202e+06	2.20424e+06	4.01254e+06	3.0619e+06	3.53722e+06	1.66938e+06	1.83644e+06	1.75291e+06	1.33298e+06	-451335
High	Master Protein	P05026	Sodium/potassium-transporting ATPase subunit beta-1 OS=Homo sapiens OX=9606 GN=ATP1B1 PE=1 SV=1	13	4	6	4	35	ATP1B1		204043	204043	3.83619e+07	3.12887e+07	3.48253e+07	2.45483e+07	3.33913e+07	2.89698e+07	3.46213e+07	2.87658e+07
High	Master Protein	Q658P3	Metalloreductase STEAP3 OS=Homo sapiens OX=9606 GN=STEAP3 PE=1 SV=2	6	2	6	2	54.6	STEAP3			#DIV/0!	5.35965e+06	4.20473e+06	4.78219e+06	2.79139e+06	3.3825e+06	3.08695e+06	#DIV/0!	#DIV/0!
High	Master Protein	Q15048	Leucine-rich repeat-containing protein 14 OS=Homo sapiens OX=9606 GN=LRRC14 PE=1 SV=1	5	3	6	3	54.5	LRRC14	105466		105466	787016	835343	811180	1.02746e+06	1.17232e+06	1.09989e+06	705713	994421
High	Master Protein	Q01085	Nucleolysin TIAR OS=Homo sapiens OX=9606 GN=TIAL1 PE=1 SV=1	6	2	6	2	41.6	TIAL1	254672	290451	272562	3.18912e+06	2.41334e+06	2801228	1.99947e+06	2.51847e+06	2.25897e+06	2.52867e+06	1.98641e+06
High	Master Protein	Q96HP0	Dedicator of cytokinesis protein 6 OS=Homo sapiens OX=9606 GN=DOCK6 PE=1 SV=3	2	3	6	2	229.4	DOCK6		329653	329653	1.22915e+06	1.35315e+06	1.29115e+06	773473	876075	824774	961498	495122
High	Master Protein	P49257	Protein ERGIC-53 OS=Homo sapiens OX=9606 GN=LMAN1 PE=1 SV=2	10	4	6	4	57.5	LMAN1	588480	197455	392967	1.09011e+07	9.01116e+06	9.95615e+06	7.28176e+06	7.0516e+06	7.16668e+06	9.56318e+06	6.77371e+06
High	Master Protein	Q9UDX5	Mitochondrial fission process protein 1 OS=Homo sapiens OX=9606 GN=MTFP1 PE=1 SV=1	14	2	6	2	18	MTFP1			#DIV/0!	2.03559e+06	1552023	1.7938e+06	1.92523e+06	2.03916e+06	1.98219e+06	#DIV/0!	#DIV/0!
High	Master Protein	Q9H2H9	Sodium-coupled neutral amino acid symporter 1 OS=Homo sapiens OX=9606 GN=SLC38A1 PE=1 SV=1	7	2	6	2	54	SLC38A1			#DIV/0!	6090168	5474291	5.78223e+06	5.44824e+06	4708869	5.07856e+06	#DIV/0!	#DIV/0!
High	Master Protein	Q99459	Cell division cycle 5-like protein OS=Homo sapiens OX=9606 GN=CDC5L PE=1 SV=2	2	2	6	2	92.2	CDC5L	997389	713394	855392	2.26885e+06	2.10272e+06	2.18578e+06	2.15195e+06	2.3014e+06	2.22667e+06	1.33039e+06	1.37128e+06
High	Master Protein	Q05086	Ubiquitin-protein ligase E3A OS=Homo sapiens OX=9606 GN=UBE3A PE=1 SV=4	4	3	6	3	100.6	UBE3A	207210	75124.7	141167	681424	1.68831e+06	1184869	1.26627e+06	1.20557e+06	1.23592e+06	1.0437e+06	1.09475e+06
High	Master Protein	O15118	NPC intracellular cholesterol transporter 1 OS=Homo sapiens OX=9606 GN=NPC1 PE=1 SV=2	3	3	6	3	142.1	NPC1			#DIV/0!	2.39944e+06	2.68451e+06	2.54197e+06	1.4591e+06	1.8087e+06	1.6339e+06	#DIV/0!	#DIV/0!
High	Master Protein	Q9NYY8	FAST kinase domain-containing protein 2, mitochondrial OS=Homo sapiens OX=9606 GN=FASTKD2 PE=1 SV=1	5	3	6	3	81.4	FASTKD2	310181	174541	242361	2.05605e+06	1493766	1.77491e+06	1311632	1.10778e+06	1.20971e+06	1.53255e+06	967346
High	Master Protein	Q9H0A0	RNA cytidine acetyltransferase OS=Homo sapiens OX=9606 GN=NAT10 PE=1 SV=2	4	2	6	2	115.7	NAT10			#DIV/0!	848972	876753	862862	618233	772782	695508	#DIV/0!	#DIV/0!
High	Master Protein	Q86X29	Lipolysis-stimulated lipoprotein receptor OS=Homo sapiens OX=9606 GN=LSR PE=1 SV=4	4	2	6	2	71.4	LSR			#DIV/0!	2.1282e+06	1.76404e+06	1.94612e+06	1.2848e+06	1.56172e+06	1.42326e+06	#DIV/0!	#DIV/0!
High	Master Protein	P10253	Lysosomal alpha-glucosidase OS=Homo sapiens OX=9606 GN=GAA PE=1 SV=4	4	3	6	3	105.3	GAA		95353.2	95353.2	2.80432e+06	2.41215e+06	2.60823e+06	1.0953e+06	1.41024e+06	1.25277e+06	2.51288e+06	1.15741e+06
High	Master Protein	O60573	Eukaryotic translation initiation factor 4E type 2 OS=Homo sapiens OX=9606 GN=EIF4E2 PE=1 SV=1	13	3	6	3	28.3	EIF4E2	185555	178130	181842	867491	331477	599484	94721		94721	417642	-87121.1
High	Master Protein	P42694	Probable helicase with zinc finger domain OS=Homo sapiens OX=9606 GN=HELZ PE=1 SV=2	3	3	6	3	218.8	HELZ		136507	136507	2.79976e+06	1674817	2.23729e+06	1.62271e+06	1.49933e+06	1.56102e+06	2.10078e+06	1.42451e+06
High	Master Protein	Q9Y263	Phospholipase A-2-activating protein OS=Homo sapiens OX=9606 GN=PLAA PE=1 SV=2	6	3	6	3	87.1	PLAA			#DIV/0!	2.67831e+06	1.96973e+06	2.32402e+06	1.34966e+06	1.11663e+06	1.23314e+06	#DIV/0!	#DIV/0!
High	Master Protein	P49770	Translation initiation factor eIF-2B subunit beta OS=Homo sapiens OX=9606 GN=EIF2B2 PE=1 SV=3	12	3	6	3	39	EIF2B2		109690	109690	2.29148e+06	1.16399e+06	1.72773e+06	1.69047e+06	2.00744e+06	1.84895e+06	1.61804e+06	1.73927e+06
High	Master Protein	Q96JX3	Protein SERAC1 OS=Homo sapiens OX=9606 GN=SERAC1 PE=1 SV=1	5	3	6	3	74.1	SERAC1		151844	151844	3.1207e+06	2.41921e+06	2.76995e+06	1.96847e+06	2.3436e+06	2.15603e+06	2.61811e+06	2.00419e+06
High	Master Protein	Q8NEY1	Neuron navigator 1 OS=Homo sapiens OX=9606 GN=NAV1 PE=1 SV=2	3	3	6	3	202.3	NAV1	254427		254427	2.10645e+06	1.36596e+06	1.73621e+06	926716	415352	671034	1.48178e+06	416607
High	Master Protein	Q53H96	Pyrroline-5-carboxylate reductase 3 OS=Homo sapiens OX=9606 GN=PYCR3 PE=1 SV=3	11	2	6	2	28.6	PYCR3	1055004	689051	872027	6802866	4878532	5840699	3.50968e+06	5.02333e+06	4.26651e+06	4.96867e+06	3.39448e+06
High	Master Protein	Q8N684	Cleavage and polyadenylation specificity factor subunit 7 OS=Homo sapiens OX=9606 GN=CPSF7 PE=1 SV=1	4	2	6	2	52	CPSF7	216380	212926	214653	1.84898e+06	1.81715e+06	1.83306e+06	1.39377e+06	1.88338e+06	1638574	1.61841e+06	1.42392e+06
High	Master Protein	O14757	Serine/threonine-protein kinase Chk1 OS=Homo sapiens OX=9606 GN=CHEK1 PE=1 SV=2	6	3	6	3	54.4	CHEK1	312367	231134	271750	1.40415e+06	1.23224e+06	1.31819e+06	941959	1.17212e+06	1.05704e+06	1.04644e+06	785291
High	Master Protein	Q04760	Lactoylglutathione lyase OS=Homo sapiens OX=9606 GN=GLO1 PE=1 SV=4	14	2	6	2	20.8	GLO1	2.28542e+06	1.70062e+06	1.99302e+06	1.80118e+06	1.9218e+06	1.86149e+06	2.20632e+06	2.42399e+06	2.31516e+06	-131528	322136
High	Master Protein	P62314	Small nuclear ribonucleoprotein Sm D1 OS=Homo sapiens OX=9606 GN=SNRPD1 PE=1 SV=1	28	3	6	3	13.3	SNRPD1	1.00525e+06	530591	767920	1.07221e+07	5952731	8.33741e+06	4.31952e+06	4.38353e+06	4.35153e+06	7569495	3.58361e+06
High	Master Protein	Q8WWI1	LIM domain only protein 7 OS=Homo sapiens OX=9606 GN=LMO7 PE=1 SV=3	1	2	6	2	192.6	LMO7	1716979	979588	1.34828e+06	1.60356e+06	1.9239e+06	1.76373e+06	718314	384074	551194	415449	-797090
High	Master Protein	P20337	Ras-related protein Rab-3B OS=Homo sapiens OX=9606 GN=RAB3B PE=1 SV=2	13	2	6	1	24.7	RAB3B			#DIV/0!	622940	413922	518431	575086	314896	444991	#DIV/0!	#DIV/0!
High	Master Protein	Q92922	SWI/SNF complex subunit SMARCC1 OS=Homo sapiens OX=9606 GN=SMARCC1 PE=1 SV=3	2	2	6	2	122.8	SMARCC1	2.13822e+06	1.30513e+06	1.72167e+06	3.01323e+06	2.31068e+06	2.66196e+06	1.59855e+06	1.44005e+06	1.5193e+06	940283	-202374
High	Master Protein	Q9UMZ2	Synergin gamma OS=Homo sapiens OX=9606 GN=SYNRG PE=1 SV=2	3	3	6	3	140.6	SYNRG		65836.8	65836.8	2.65742e+06	1.25591e+06	1.95666e+06	1.03555e+06	919657	977602	1.89082e+06	911765
High	Master Protein	Q99538	Legumain OS=Homo sapiens OX=9606 GN=LGMN PE=1 SV=1	8	3	6	3	49.4	LGMN	949051	308392	628721	4.76466e+06	4977522	4.87109e+06	3.96899e+06	3.8523e+06	3.91064e+06	4.24237e+06	3.28192e+06
High	Master Protein	Q658Y4	Protein FAM91A1 OS=Homo sapiens OX=9606 GN=FAM91A1 PE=1 SV=3	3	2	6	2	93.9	FAM91A1	592605	346225	469415	2.18397e+06	2.52629e+06	2.35513e+06	2.34389e+06	2.59577e+06	2.46983e+06	1.88572e+06	2.00041e+06
High	Master Protein	Q5SWX8	Protein odr-4 homolog OS=Homo sapiens OX=9606 GN=ODR4 PE=1 SV=1	6	2	6	2	51.1	ODR4		94935	94935	3.82857e+06	2.75784e+06	3.2932e+06	1.77999e+06	3.09774e+06	2.43887e+06	3.19827e+06	2.34393e+06
High	Master Protein	P61009	Signal peptidase complex subunit 3 OS=Homo sapiens OX=9606 GN=SPCS3 PE=1 SV=1	12	2	6	2	20.3	SPCS3		370135	370135	5509676	2.84775e+06	4.17871e+06	2.67822e+06	3.32398e+06	3.0011e+06	3.80858e+06	2.63096e+06
High	Master Protein	Q8N1S5	Zinc transporter ZIP11 OS=Homo sapiens OX=9606 GN=SLC39A11 PE=2 SV=3	10	2	6	2	35.4	SLC39A11			#DIV/0!	9.24746e+06	5.2525e+06	7.24998e+06	2.95586e+06	3.63211e+06	3.29399e+06	#DIV/0!	#DIV/0!
High	Master Protein	Q9Y5K5	Ubiquitin carboxyl-terminal hydrolase isozyme L5 OS=Homo sapiens OX=9606 GN=UCHL5 PE=1 SV=3	12	4	6	4	37.6	UCHL5			#DIV/0!	3.09094e+06	1.21623e+06	2.15358e+06	407047	1.64891e+06	1.02798e+06	#DIV/0!	#DIV/0!
High	Master Protein	Q99595	Mitochondrial import inner membrane translocase subunit Tim17-A OS=Homo sapiens OX=9606 GN=TIMM17A PE=1 SV=1	18	2	6	2	18	TIMM17A	243490		243490	7.62522e+06	5.62818e+06	6.6267e+06	4.32268e+06	4.90832e+06	4.6155e+06	6.38321e+06	4.37201e+06
High	Master Protein	Q96EP5	DAZ-associated protein 1 OS=Homo sapiens OX=9606 GN=DAZAP1 PE=1 SV=1	10	3	6	3	43.4	DAZAP1	254926		254926	1.82502e+06	1414421	1.61972e+06	823502	1.08679e+06	955147	1.36479e+06	700222
High	Master Protein	Q9HCE1	Helicase MOV-10 OS=Homo sapiens OX=9606 GN=MOV10 PE=1 SV=2	5	4	6	4	113.6	MOV10	1.08971e+06	603354	846533	4.23923e+06	3.8184e+06	4.02882e+06	1.15115e+06	3.45612e+06	2.30363e+06	3.18228e+06	1.4571e+06
High	Master Protein	Q86VR2	Reticulophagy regulator 3 OS=Homo sapiens OX=9606 GN=RETREG3 PE=1 SV=1	9	3	6	3	51.4	RETREG3		157875	157875	4.1386e+06	3.23315e+06	3.68587e+06	3.83079e+06	3.79197e+06	3.81138e+06	3.528e+06	3.65351e+06
High	Master Protein	P56134	ATP synthase subunit f, mitochondrial OS=Homo sapiens OX=9606 GN=ATP5MF PE=1 SV=3	26	2	6	2	10.9	ATP5MF	1.8101e+06	1.36508e+06	1.58759e+06	3.43623e+07	1.83391e+07	26350668	1.52149e+07	2.0265e+07	1.774e+07	2.47631e+07	1.61524e+07
High	Master Protein	Q9Y4I1	Unconventional myosin-Va OS=Homo sapiens OX=9606 GN=MYO5A PE=1 SV=2	2	3	6	3	215.3	MYO5A	595379	468379	531879	3.0655e+06	1.62184e+06	2.34367e+06	1.18346e+06	1.2963e+06	1.23988e+06	1.81179e+06	708001
High	Master Protein	O14523	Phospholipid transfer protein C2CD2L OS=Homo sapiens OX=9606 GN=C2CD2L PE=1 SV=3	6	3	6	3	76.1	C2CD2L	216940	144058	180499	1.30319e+06	977308	1.14025e+06	942998	996957	969978	959750	789479
High	Master Protein	O75691	Small subunit processome component 20 homolog OS=Homo sapiens OX=9606 GN=UTP20 PE=1 SV=3	1	4	6	4	318.2	UTP20			#DIV/0!	2.71567e+06	1.81973e+06	2.2677e+06	794198	701795	747996	#DIV/0!	#DIV/0!
High	Master Protein	Q9Y673	Dolichyl-phosphate beta-glucosyltransferase OS=Homo sapiens OX=9606 GN=ALG5 PE=1 SV=1	11	3	6	3	36.9	ALG5			#DIV/0!	4753311	3.24373e+06	3.99852e+06	2.35728e+06	2.33329e+06	2.34529e+06	#DIV/0!	#DIV/0!
High	Master Protein	P11047	Laminin subunit gamma-1 OS=Homo sapiens OX=9606 GN=LAMC1 PE=1 SV=3	2	2	6	2	177.5	LAMC1			#DIV/0!	1.15166e+06	822998	987330	596371	553204	574788	#DIV/0!	#DIV/0!
High	Master Protein	Q96RP9	Elongation factor G, mitochondrial OS=Homo sapiens OX=9606 GN=GFM1 PE=1 SV=2	4	3	6	3	83.4	GFM1	894710	517712	706211	5.42012e+06	5.03906e+06	5.22959e+06	3.52007e+06	4.38473e+06	3.9524e+06	4.52338e+06	3.24619e+06
High	Master Protein	Q92643	GPI-anchor transamidase OS=Homo sapiens OX=9606 GN=PIGK PE=1 SV=2	6	2	6	2	45.2	PIGK			#DIV/0!	6.23559e+06	5.09869e+06	5667140	5501387	5.87907e+06	5.69023e+06	#DIV/0!	#DIV/0!
High	Master Protein	Q9NPF4	tRNA N6-adenosine threonylcarbamoyltransferase OS=Homo sapiens OX=9606 GN=OSGEP PE=1 SV=1	6	2	6	2	36.4	OSGEP	570939	299872	435406	4.60894e+06	3.02569e+06	3.81732e+06	2012717	2.79223e+06	2.40248e+06	3.38191e+06	1.96707e+06
High	Master Protein	Q96AQ6	Pre-B-cell leukemia transcription factor-interacting protein 1 OS=Homo sapiens OX=9606 GN=PBXIP1 PE=1 SV=1	6	4	6	4	80.6	PBXIP1			#DIV/0!	2.27754e+06	1.86776e+06	2.07265e+06	586096	2.1819e+06	1.384e+06	#DIV/0!	#DIV/0!
High	Master Protein	Q9BVG9	Phosphatidylserine synthase 2 OS=Homo sapiens OX=9606 GN=PTDSS2 PE=1 SV=1	7	3	6	3	56.2	PTDSS2			#DIV/0!	13134666	9.27303e+06	1.12038e+07	7.43941e+06	7.94236e+06	7.69089e+06	#DIV/0!	#DIV/0!
High	Master Protein	Q8IY81	pre-rRNA 2'-O-ribose RNA methyltransferase FTSJ3 OS=Homo sapiens OX=9606 GN=FTSJ3 PE=1 SV=2	2	2	6	2	96.5	FTSJ3	2.95087e+06	1.99917e+06	2.47502e+06	3.32966e+06	2.72114e+06	3.0254e+06	2.52268e+06	2.12686e+06	2.32477e+06	550379	-150248
High	Master Protein	Q9BT25	HAUS augmin-like complex subunit 8 OS=Homo sapiens OX=9606 GN=HAUS8 PE=1 SV=3	9	2	6	2	44.8	HAUS8	642171	947361	794766	2.49989e+06	2757825	2.62886e+06	2.39118e+06	2.80406e+06	2597623	1.83409e+06	1.80286e+06
High	Master Protein	Q7Z4H7	HAUS augmin-like complex subunit 6 OS=Homo sapiens OX=9606 GN=HAUS6 PE=1 SV=2	5	3	6	3	108.6	HAUS6	2.05174e+06	2.38017e+06	2.21595e+06	7.16719e+06	5.39589e+06	6.28154e+06	4.1885e+06	3.05034e+06	3.61942e+06	4.06559e+06	1.40346e+06
High	Master Protein	Q86VU5	Catechol O-methyltransferase domain-containing protein 1 OS=Homo sapiens OX=9606 GN=COMTD1 PE=1 SV=1	19	2	6	2	28.8	COMTD1			#DIV/0!	763275	710871	737073	858297	467825	663061	#DIV/0!	#DIV/0!
High	Master Protein	Q32MZ4	Leucine-rich repeat flightless-interacting protein 1 OS=Homo sapiens OX=9606 GN=LRRFIP1 PE=1 SV=2	3	2	6	2	89.2	LRRFIP1	229578	112121	170849	449383	344445	396914	201078	159235	180157	226065	9307.25
High	Master Protein	Q8IV08	5'-3' exonuclease PLD3 OS=Homo sapiens OX=9606 GN=PLD3 PE=1 SV=1	4	2	6	2	54.7	PLD3	302754	191819	247287	3.04328e+06	3.00867e+06	3.02598e+06	2667791	3.03643e+06	2.85211e+06	2.77869e+06	2.60482e+06
High	Master Protein	Q96AY3	Peptidyl-prolyl cis-trans isomerase FKBP10 OS=Homo sapiens OX=9606 GN=FKBP10 PE=1 SV=1	4	2	6	2	64.2	FKBP10			#DIV/0!	3.12022e+06	2489774	2.80499e+06	2.17676e+06	1.85157e+06	2.01416e+06	#DIV/0!	#DIV/0!
High	Master Protein	Q8IWV7	E3 ubiquitin-protein ligase UBR1 OS=Homo sapiens OX=9606 GN=UBR1 PE=1 SV=1	1	2	6	2	200.1	UBR1	1.01666e+07	6.54929e+06	8.35796e+06	1.83474e+07	1.51203e+07	1.67338e+07	8.70741e+06	1.28613e+07	1.07844e+07	8.37588e+06	2.42641e+06
High	Master Protein	Q8NFH5	Nucleoporin NUP35 OS=Homo sapiens OX=9606 GN=NUP35 PE=1 SV=1	13	3	6	3	34.8	NUP35			#DIV/0!	1730921	1.31899e+06	1.52496e+06	780749	1249211	1.01498e+06	#DIV/0!	#DIV/0!
High	Master Protein	Q13188	Serine/threonine-protein kinase 3 OS=Homo sapiens OX=9606 GN=STK3 PE=1 SV=2	4	2	6	2	56.3	STK3	222887	280993	251940	1.87187e+06	1.3504e+06	1.61114e+06	1.20499e+06	1.58887e+06	1.39693e+06	1.35919e+06	1.14499e+06
High	Master Protein	P54764	Ephrin type-A receptor 4 OS=Homo sapiens OX=9606 GN=EPHA4 PE=1 SV=1	2	2	6	2	109.8	EPHA4			#DIV/0!	1.20453e+06	708265	956396	473845	881305	677575	#DIV/0!	#DIV/0!
High	Master Protein	Q8N0U8	Vitamin K epoxide reductase complex subunit 1-like protein 1 OS=Homo sapiens OX=9606 GN=VKORC1L1 PE=1 SV=2	12	2	6	2	19.8	VKORC1L1		116248	116248	3.54888e+06	2.67272e+06	3.1108e+06	2.25756e+06	3034039	2.6458e+06	2.99455e+06	2.52955e+06
High	Master Protein	P49756	RNA-binding protein 25 OS=Homo sapiens OX=9606 GN=RBM25 PE=1 SV=3	3	3	6	3	100.1	RBM25			#DIV/0!	651033	542966	596999	464166	396338	430252	#DIV/0!	#DIV/0!
High	Master Protein	Q8NB46	Serine/threonine-protein phosphatase 6 regulatory ankyrin repeat subunit C OS=Homo sapiens OX=9606 GN=ANKRD52 PE=1 SV=3	2	2	6	1	115	ANKRD52			#DIV/0!	952028	871086	911557	723508	764697	744103	#DIV/0!	#DIV/0!
High	Master Protein	P28289	Tropomodulin-1 OS=Homo sapiens OX=9606 GN=TMOD1 PE=1 SV=1	10	3	6	2	40.5	TMOD1	538348	391880	465114	1.95583e+06	1.48434e+06	1.72008e+06	850707	605484	728095	1.25497e+06	262982
High	Master Protein	P29597	Non-receptor tyrosine-protein kinase TYK2 OS=Homo sapiens OX=9606 GN=TYK2 PE=1 SV=3	2	2	6	2	133.6	TYK2			#DIV/0!	954550	800926	877738	565905	560878	563392	#DIV/0!	#DIV/0!
High	Master Protein	O43169	Cytochrome b5 type B OS=Homo sapiens OX=9606 GN=CYB5B PE=1 SV=3	31	2	6	2	16.7	CYB5B		104155	104155	3.8618e+06	3.08752e+06	3.47466e+06	2.87334e+06	3.2583e+06	3.06582e+06	3.3705e+06	2.96167e+06
High	Master Protein	Q9Y282	Endoplasmic reticulum-Golgi intermediate compartment protein 3 OS=Homo sapiens OX=9606 GN=ERGIC3 PE=1 SV=1	7	3	6	3	43.2	ERGIC3			#DIV/0!	5.39114e+06	6.15741e+06	5.77428e+06	5.00242e+06	7.02352e+06	6.01297e+06	#DIV/0!	#DIV/0!
High	Master Protein	O60547	GDP-mannose 4,6 dehydratase OS=Homo sapiens OX=9606 GN=GMDS PE=1 SV=1	8	3	6	3	41.9	GMDS	72770.1	453651	263211	5.47988e+06	2.69081e+06	4.08534e+06	2.32453e+06	3097680	2.7111e+06	3.82213e+06	2.44789e+06
High	Master Protein	Q9HB71	Calcyclin-binding protein OS=Homo sapiens OX=9606 GN=CACYBP PE=1 SV=2	7	2	6	2	26.2	CACYBP	5777027	5420388	5.59871e+06	4.59706e+06	3.52866e+06	4062860	3900203	5080936	4.49057e+06	-1.53585e+06	-1108138
High	Master Protein	Q9P032	NADH dehydrogenase [ubiquinone] 1 alpha subcomplex assembly factor 4 OS=Homo sapiens OX=9606 GN=NDUFAF4 PE=1 SV=1	14	2	6	2	20.3	NDUFAF4			#DIV/0!	5314379	4961396	5.13789e+06	2.69333e+06	4.35928e+06	3.52631e+06	#DIV/0!	#DIV/0!
High	Master Protein	O14966	Ras-related protein Rab-7L1 OS=Homo sapiens OX=9606 GN=RAB29 PE=1 SV=1	9	2	6	1	23.1	RAB29			#DIV/0!	818308	528042	673175	475400	723702	599551	#DIV/0!	#DIV/0!
High	Master Protein	Q9Y6I9	Testis-expressed protein 264 OS=Homo sapiens OX=9606 GN=TEX264 PE=1 SV=1	8	2	6	2	34.2	TEX264			#DIV/0!	9.13523e+06	5866811	7.50102e+06	4.23109e+06	4.90743e+06	4.56926e+06	#DIV/0!	#DIV/0!
High	Master Protein	Q9H814	Phosphorylated adapter RNA export protein OS=Homo sapiens OX=9606 GN=PHAX PE=1 SV=1	5	2	6	2	44.4	PHAX	304031	160109	232070	2.1908e+06	2.02572e+06	2.10826e+06	1508978	1.6105e+06	1.55974e+06	1.87619e+06	1.32767e+06
High	Master Protein	Q92747	Actin-related protein 2/3 complex subunit 1A OS=Homo sapiens OX=9606 GN=ARPC1A PE=1 SV=2	6	2	6	2	41.5	ARPC1A	1.24826e+06	756399	1.00233e+06	6713726	3.32294e+06	5.01833e+06	5.18304e+06	6.05713e+06	5620082	4.016e+06	4.61775e+06
High	Master Protein	Q9HA92	Radical S-adenosyl methionine domain-containing protein 1, mitochondrial OS=Homo sapiens OX=9606 GN=RSAD1 PE=1 SV=2	9	3	6	3	48.7	RSAD1	209601	415766	312684	2.77853e+06	1.95441e+06	2.36647e+06	1.4372e+06	1.85996e+06	1.64858e+06	2.05379e+06	1.3359e+06
High	Master Protein	Q8N766	ER membrane protein complex subunit 1 OS=Homo sapiens OX=9606 GN=EMC1 PE=1 SV=1	5	3	6	3	111.7	EMC1			#DIV/0!	3.25851e+06	3.21836e+06	3.23844e+06	2.97831e+06	3.40771e+06	3.19301e+06	#DIV/0!	#DIV/0!
High	Master Protein	Q9C0C2	182 kDa tankyrase-1-binding protein OS=Homo sapiens OX=9606 GN=TNKS1BP1 PE=1 SV=4	2	3	6	3	181.7	TNKS1BP1	1.09473e+06	296989	695861	344482	316250	330366	166376	176625	171501	-365495	-524360
High	Master Protein	P33897	ATP-binding cassette sub-family D member 1 OS=Homo sapiens OX=9606 GN=ABCD1 PE=1 SV=2	3	2	6	2	82.9	ABCD1			#DIV/0!	997907	1.02302e+06	1.01046e+06			#DIV/0!	#DIV/0!	#DIV/0!
High	Master Protein	Q8WUM4	Programmed cell death 6-interacting protein OS=Homo sapiens OX=9606 GN=PDCD6IP PE=1 SV=1	4	3	6	3	96	PDCD6IP	728481	1.85313e+06	1.2908e+06	4.5161e+06	3.22628e+06	3.87119e+06	2.71453e+06	3.50341e+06	3108972	2580388	1.81817e+06
High	Master Protein	Q8WXA3	RUN and FYVE domain-containing protein 2 OS=Homo sapiens OX=9606 GN=RUFY2 PE=1 SV=3	4	2	6	2	70	RUFY2			#DIV/0!	2.55385e+06	1.00655e+06	1.7802e+06	1.62373e+06	2.07057e+06	1.84715e+06	#DIV/0!	#DIV/0!
High	Master Protein	Q9NUM4	Transmembrane protein 106B OS=Homo sapiens OX=9606 GN=TMEM106B PE=1 SV=2	11	2	6	2	31.1	TMEM106B			#DIV/0!	1.84383e+06	1.61812e+06	1.73097e+06	1.36832e+06	1.86985e+06	1.61908e+06	#DIV/0!	#DIV/0!
High	Master Protein	Q96RQ1	Endoplasmic reticulum-Golgi intermediate compartment protein 2 OS=Homo sapiens OX=9606 GN=ERGIC2 PE=1 SV=2	11	3	6	3	42.5	ERGIC2			#DIV/0!	4.12274e+06	3.35717e+06	3.73996e+06	3.19852e+06	3.62656e+06	3.41254e+06	#DIV/0!	#DIV/0!
High	Master Protein	P61254	Large ribosomal subunit protein uL24 OS=Homo sapiens OX=9606 GN=RPL26 PE=1 SV=1	21	3	6	3	17.2	RPL26	891848	567122	729485	6.32489e+06	6.71291e+06	6.5189e+06	4.73363e+06	5.35693e+06	5.04528e+06	5.78941e+06	4.31579e+06
High	Master Protein	Q02487	Desmocollin-2 OS=Homo sapiens OX=9606 GN=DSC2 PE=1 SV=1	4	2	6	2	99.9	DSC2	174132		174132	2.70216e+06	2.18863e+06	2.44539e+06	1.99117e+06	1.85121e+06	1.92119e+06	2.27126e+06	1.74706e+06
High	Master Protein	Q8N6H7	ADP-ribosylation factor GTPase-activating protein 2 OS=Homo sapiens OX=9606 GN=ARFGAP2 PE=1 SV=1	7	4	6	3	56.7	ARFGAP2	155895	258397	207146	1.62453e+06	1.41336e+06	1.51895e+06	710068	1.51705e+06	1.11356e+06	1.3118e+06	906412
High	Master Protein	Q68CQ7	Glycosyltransferase 8 domain-containing protein 1 OS=Homo sapiens OX=9606 GN=GLT8D1 PE=1 SV=2	13	3	6	3	41.9	GLT8D1			#DIV/0!	2.35212e+06	2.00603e+06	2.17908e+06	1.90242e+06	2.07148e+06	1.98695e+06	#DIV/0!	#DIV/0!
High	Master Protein	Q92990	Glomulin OS=Homo sapiens OX=9606 GN=GLMN PE=1 SV=2	3	2	6	2	68.2	GLMN		66981.1	66981.1	2.66504e+06	1.73464e+06	2199840	1.46411e+06	2.2124e+06	1.83825e+06	2.13286e+06	1.77127e+06
High	Master Protein	Q9H1A4	Anaphase-promoting complex subunit 1 OS=Homo sapiens OX=9606 GN=ANAPC1 PE=1 SV=1	2	3	6	3	216.4	ANAPC1			#DIV/0!	2366357	2.26297e+06	2.31467e+06	1.56349e+06	1.68739e+06	1.62544e+06	#DIV/0!	#DIV/0!
High	Master Protein	Q96HR8	H/ACA ribonucleoprotein complex non-core subunit NAF1 OS=Homo sapiens OX=9606 GN=NAF1 PE=1 SV=2	6	2	6	2	53.7	NAF1			#DIV/0!	1.0773e+06	827120	952210	993033	1132299	1.06267e+06	#DIV/0!	#DIV/0!
High	Master Protein	P0C0L4	Complement C4-A OS=Homo sapiens OX=9606 GN=C4A PE=1 SV=2	2	2	6	2	192.7	C4A	294539	409884	352211	1.61025e+06	998805	1.30453e+06	799751	954246	876998	952315	524787
High	Master Protein	Q5BJH7	Protein YIF1B OS=Homo sapiens OX=9606 GN=YIF1B PE=1 SV=1	7	2	6	2	34.4	YIF1B	191750	237088	214419	3.9667e+06	2.42843e+06	3.19756e+06	1.95893e+06	3208530	2.58373e+06	2.98314e+06	2.36931e+06
High	Master Protein	P84103	Serine/arginine-rich splicing factor 3 OS=Homo sapiens OX=9606 GN=SRSF3 PE=1 SV=1	18	2	6	2	19.3	SRSF3	13257060	10323511	1.17903e+07	41510284	22103083	3.18067e+07	25769717	30960893	28365305	20016398	1.6575e+07
High	Master Protein	Q16822	Phosphoenolpyruvate carboxykinase [GTP], mitochondrial OS=Homo sapiens OX=9606 GN=PCK2 PE=1 SV=4	6	3	6	3	70.7	PCK2	250861	196423	223642	1.38704e+06	938815	1.16293e+06	755759	833867	794813	939287	571172
High	Master Protein	Q99959	Plakophilin-2 OS=Homo sapiens OX=9606 GN=PKP2 PE=1 SV=2	5	4	6	4	97.4	PKP2	189722	344524	267123	3.06112e+06	1.98447e+06	2.5228e+06	1.22749e+06	1.81534e+06	1.52141e+06	2.25568e+06	1.25429e+06
High	Master Protein	Q9NRW7	Vacuolar protein sorting-associated protein 45 OS=Homo sapiens OX=9606 GN=VPS45 PE=1 SV=1	6	3	6	3	65	VPS45		51035.9	51035.9	1.46188e+06	1.43932e+06	1.4506e+06	950114	1.32143e+06	1.13577e+06	1.39957e+06	1.08474e+06
High	Master Protein	Q70IA6	MOB kinase activator 2 OS=Homo sapiens OX=9606 GN=MOB2 PE=1 SV=1	8	2	6	2	26.9	MOB2		379704	379704	6.41157e+06	4.65501e+06	5.53329e+06	2.83214e+06	3.60142e+06	3216784	5.15358e+06	2.83708e+06
High	Master Protein	P56537	Eukaryotic translation initiation factor 6 OS=Homo sapiens OX=9606 GN=EIF6 PE=1 SV=1	17	2	6	2	26.6	EIF6	1.89655e+07	9.07587e+06	1.40207e+07	3397305	2.59418e+06	2.99574e+06	2413257	2666476	2.53987e+06	-1.1025e+07	-1.14808e+07
High	Master Protein	P10599	Thioredoxin OS=Homo sapiens OX=9606 GN=TXN PE=1 SV=3	19	3	6	3	11.7	TXN	4.90785e+06	1.95874e+06	3.43329e+06	2.69562e+07	1.30425e+07	1.99994e+07	1.13099e+07	1.1012e+07	1.11609e+07	1.65661e+07	7.72765e+06
High	Master Protein	P52294	Importin subunit alpha-5 OS=Homo sapiens OX=9606 GN=KPNA1 PE=1 SV=3	8	3	6	3	60.2	KPNA1		149014	149014	1.89257e+06	812620	1.35259e+06	1.03785e+06	1.42733e+06	1.23259e+06	1.20358e+06	1.08358e+06
High	Master Protein	O95864	Acyl-CoA 6-desaturase OS=Homo sapiens OX=9606 GN=FADS2 PE=1 SV=1	6	2	6	2	52.2	FADS2			#DIV/0!	4.53964e+06	3.07806e+06	3.80885e+06	2.66962e+06	4726815	3.69822e+06	#DIV/0!	#DIV/0!
High	Master Protein	Q92544	Transmembrane 9 superfamily member 4 OS=Homo sapiens OX=9606 GN=TM9SF4 PE=1 SV=2	4	2	6	2	74.5	TM9SF4			#DIV/0!	2.39006e+06	1.53024e+06	1.96015e+06	1.07341e+06	1.58583e+06	1.32962e+06	#DIV/0!	#DIV/0!
High	Master Protein	Q15003	Condensin complex subunit 2 OS=Homo sapiens OX=9606 GN=NCAPH PE=1 SV=3	4	3	6	3	82.5	NCAPH	789798	228789	509293	3.66933e+06	2.28267e+06	2.976e+06	1.46794e+06	1.81951e+06	1.64373e+06	2.46671e+06	1.13443e+06
High	Master Protein	Q5K4L6	Long-chain fatty acid transport protein 3 OS=Homo sapiens OX=9606 GN=SLC27A3 PE=1 SV=4	6	2	6	2	73.5	SLC27A3			#DIV/0!	560727	340028	450377	309570	317328	313449	#DIV/0!	#DIV/0!
High	Master Protein	P07339	Cathepsin D OS=Homo sapiens OX=9606 GN=CTSD PE=1 SV=1	9	3	6	3	44.5	CTSD	171974	251919	211946	1.42126e+06	1.19657e+06	1.30892e+06	1.10893e+06	1.52559e+06	1.31726e+06	1.09697e+06	1.10531e+06
High	Master Protein	O15091	Mitochondrial ribonuclease P catalytic subunit OS=Homo sapiens OX=9606 GN=PRORP PE=1 SV=2	5	3	6	3	67.3	PRORP		113432	113432	3.34447e+06	2.07742e+06	2.71095e+06	2.12194e+06	2.52233e+06	2.32214e+06	2.59751e+06	2.2087e+06
High	Master Protein	P20340	Ras-related protein Rab-6A OS=Homo sapiens OX=9606 GN=RAB6A PE=1 SV=3	11	2	6	1	23.6	RAB6A			#DIV/0!	2.82058e+06	1.36684e+06	2093713	1162451	1.78986e+06	1.47615e+06	#DIV/0!	#DIV/0!
High	Master Protein	Q9BVC6	Voltage-gated monoatomic cation channel TMEM109 OS=Homo sapiens OX=9606 GN=TMEM109 PE=1 SV=1	9	2	6	2	26.2	TMEM109	954238	703296	828767	4.53684e+06	4.17454e+06	4.35569e+06	3.49856e+06	3.2312e+06	3.36488e+06	3.52692e+06	2.53611e+06
High	Master Protein	O15379	Histone deacetylase 3 OS=Homo sapiens OX=9606 GN=HDAC3 PE=1 SV=2	6	2	6	1	48.8	HDAC3		90197	90197	535196	550638	542917	369805	448621	409213	452720	319016
High	Master Protein	Q9H6S0	3'-5' RNA helicase YTHDC2 OS=Homo sapiens OX=9606 GN=YTHDC2 PE=1 SV=2	2	3	6	3	160.1	YTHDC2	1.03645e+06	1.51728e+06	1.27686e+06	2.59849e+06	2.07812e+06	2.3383e+06	1250911	1.60564e+06	1.42827e+06	1.06144e+06	151410
High	Master Protein	Q96AV8	Transcription factor E2F7 OS=Homo sapiens OX=9606 GN=E2F7 PE=1 SV=3	5	3	6	3	99.8	E2F7			#DIV/0!	1.18004e+06	561460	870749	331119	554415	442767	#DIV/0!	#DIV/0!
High	Master Protein	Q9BU23	Lipase maturation factor 2 OS=Homo sapiens OX=9606 GN=LMF2 PE=1 SV=2	9	4	6	4	79.6	LMF2	256487	156791	206639	7.25222e+06	4.61855e+06	5.93538e+06	3.49108e+06	3.33685e+06	3.41396e+06	5.72874e+06	3.20732e+06
High	Master Protein	Q9BTE7	DCN1-like protein 5 OS=Homo sapiens OX=9606 GN=DCUN1D5 PE=1 SV=1	8	2	6	2	27.5	DCUN1D5			#DIV/0!	3463307	2868554	3.16593e+06	3.69274e+06	4.13194e+06	3.91234e+06	#DIV/0!	#DIV/0!
High	Master Protein	Q6NZY4	Zinc finger CCHC domain-containing protein 8 OS=Homo sapiens OX=9606 GN=ZCCHC8 PE=1 SV=2	10	5	6	5	78.5	ZCCHC8	280799	408759	344779	8.65183e+06	3.78459e+06	6.21821e+06	4.75699e+06	5.48495e+06	5.12097e+06	5.87343e+06	4.77619e+06
High	Master Protein	Q6Y7W6	GRB10-interacting GYF protein 2 OS=Homo sapiens OX=9606 GN=GIGYF2 PE=1 SV=1	3	3	6	3	150	GIGYF2	1.46124e+06	938532	1.19989e+06	951904	2.76275e+06	1.85733e+06	453611	3.37992e+06	1.91676e+06	657442	716878
High	Master Protein	Q00577	Transcriptional activator protein Pur-alpha OS=Homo sapiens OX=9606 GN=PURA PE=1 SV=2	15	2	5	2	34.9	PURA		174462	174462	1.33784e+06	898765	1.1183e+06	975213	1.06684e+06	1.02103e+06	943841	846564
High	Master Protein	Q7L5N7	Lysophosphatidylcholine acyltransferase 2 OS=Homo sapiens OX=9606 GN=LPCAT2 PE=1 SV=1	5	3	5	3	60.2	LPCAT2			#DIV/0!	4415117	3.49146e+06	3.95329e+06	2.78979e+06	3.12082e+06	2.9553e+06	#DIV/0!	#DIV/0!
High	Master Protein	Q7Z2W9	Large ribosomal subunit protein bL21m OS=Homo sapiens OX=9606 GN=MRPL21 PE=1 SV=2	14	2	5	2	22.8	MRPL21			#DIV/0!	896702	627442	762072	576502	495884	536193	#DIV/0!	#DIV/0!
High	Master Protein	Q9BQE5	Apolipoprotein L2 OS=Homo sapiens OX=9606 GN=APOL2 PE=1 SV=2	10	3	5	3	37.1	APOL2	266967		266967	3.18401e+06	2.45756e+06	2.82079e+06	1.93989e+06	2.36402e+06	2.15196e+06	2.55382e+06	1.88499e+06
High	Master Protein	O00308	NEDD4-like E3 ubiquitin-protein ligase WWP2 OS=Homo sapiens OX=9606 GN=WWP2 PE=1 SV=2	2	2	5	2	98.9	WWP2	366525	276421	321473	657664	508518	583091	433403	415639	424521	261618	103048
High	Master Protein	P33947	ER lumen protein-retaining receptor 2 OS=Homo sapiens OX=9606 GN=KDELR2 PE=1 SV=1	17	2	5	2	24.4	KDELR2			#DIV/0!	1.3876e+06	937101	1.16235e+06	817865	558266	688065	#DIV/0!	#DIV/0!
High	Master Protein	Q99569	Plakophilin-4 OS=Homo sapiens OX=9606 GN=PKP4 PE=1 SV=2	2	2	5	2	131.8	PKP4		179615	179615	1.31773e+06	1.31089e+06	1.31431e+06	934388	1.31658e+06	1.12548e+06	1134694	945868
High	Master Protein	Q9UKV8	Protein argonaute-2 OS=Homo sapiens OX=9606 GN=AGO2 PE=1 SV=3	2	2	5	2	97.1	AGO2	269793	240567	255180	2.05089e+06	1405273	1.72808e+06	1.21859e+06	1.03055e+06	1.12457e+06	1.4729e+06	869390
High	Master Protein	Q5VIR6	Vacuolar protein sorting-associated protein 53 homolog OS=Homo sapiens OX=9606 GN=VPS53 PE=1 SV=2	5	3	5	3	94.3	VPS53	259892	310971	285432	2.14714e+06	1.66719e+06	1.90717e+06	1.60624e+06	1.64568e+06	1.62596e+06	1.62173e+06	1.34052e+06
High	Master Protein	Q9Y606	Pseudouridylate synthase 1 homolog OS=Homo sapiens OX=9606 GN=PUS1 PE=1 SV=3	5	2	5	2	47.4	PUS1		222364	222364	1.5308e+06	840538	1.18567e+06	658312	789522	723917	963306	501554
High	Master Protein	Q86X55	Histone-arginine methyltransferase CARM1 OS=Homo sapiens OX=9606 GN=CARM1 PE=1 SV=3	4	2	5	2	65.8	CARM1	1.15187e+06	728932	940403	4.52533e+06	3.97129e+06	4.24831e+06	3379589	4.30574e+06	3.84267e+06	3.30791e+06	2.90226e+06
High	Master Protein	Q13131	5'-AMP-activated protein kinase catalytic subunit alpha-1 OS=Homo sapiens OX=9606 GN=PRKAA1 PE=1 SV=4	6	3	5	3	64	PRKAA1	425078	296130	360604	1.68074e+06	1.64456e+06	1.66265e+06	1.39123e+06	1.29138e+06	1.34131e+06	1.30205e+06	980702
High	Master Protein	Q8NE71	ATP-binding cassette sub-family F member 1 OS=Homo sapiens OX=9606 GN=ABCF1 PE=1 SV=2	2	2	5	2	95.9	ABCF1		591968	591968	1.5746e+06	947946	1.26127e+06	905287	1.17357e+06	1.03943e+06	669304	447461
High	Master Protein	P02765	Alpha-2-HS-glycoprotein OS=Homo sapiens OX=9606 GN=AHSG PE=1 SV=2	4	2	5	2	39.3	AHSG	304110	65501.6	184806	466021	867946	666983	529204	614907	572055	482177	387249
High	Master Protein	Q13232	Nucleoside diphosphate kinase 3 OS=Homo sapiens OX=9606 GN=NME3 PE=1 SV=2	17	2	5	2	19	NME3			#DIV/0!	968494	1.07353e+06	1.02101e+06	1.48504e+06	1209054	1.34705e+06	#DIV/0!	#DIV/0!
High	Master Protein	Q6ZWT7	Lysophospholipid acyltransferase 2 OS=Homo sapiens OX=9606 GN=MBOAT2 PE=1 SV=2	4	2	5	2	59.5	MBOAT2			#DIV/0!	503782	220242	362012	157094		157094	#DIV/0!	#DIV/0!
High	Master Protein	O75110	Probable phospholipid-transporting ATPase IIA OS=Homo sapiens OX=9606 GN=ATP9A PE=1 SV=3	2	2	5	2	118.5	ATP9A			#DIV/0!	3.23233e+06	2478879	2.85561e+06	1.69436e+06	1.61275e+06	1.65355e+06	#DIV/0!	#DIV/0!
High	Master Protein	P43355	Melanoma-associated antigen 1 OS=Homo sapiens OX=9606 GN=MAGEA1 PE=1 SV=1	6	2	5	1	34.3	MAGEA1			#DIV/0!	474450	350348	412399	311713	408669	360191	#DIV/0!	#DIV/0!
High	Master Protein	Q9UFG5	UPF0449 protein C19orf25 OS=Homo sapiens OX=9606 GN=C19orf25 PE=1 SV=2	36	2	5	2	12.9	C19orf25			#DIV/0!	2.41592e+06	1.37436e+06	1.89514e+06	930881	1.1521e+06	1.04149e+06	#DIV/0!	#DIV/0!
[truncated: 1,377 more rows]

## Sheet: CRapome results
User Input	Mapped Gene Symbol	Num of Expt. (found/total)	Ave SC	Max SC
Q16678	CYP1B1	2 / 716	1	1
[truncated: 1,911 more rows]

## Sheet: Post Filtered proteins
Protein FDR Confidence Combined	Master	Accession	Description	Gene Symbol	Abundance ECL1_1173151	Abundance ECL1_1173152	Average GFP	Abundance ECL1_1173153	Abundance ECL1_1173154	Average C1 and C2	Abundance ECL1_1173155	Abundance ECL1_1173156	Average C3 and C4	Determining abudance in C1 and C2	Determining abudance in C3 and C4
[truncated: 2,596 more rows]
[truncated: 1 more columns]

[truncated: 2 more sheets: Final list _protein_analysis, Fold expn_normalized GAPDH]
