# Supplementary material for: CYP1B1-AS1 regulates CYP1B1 to promote Coxiella burnetii pathogenesis by inhibiting ROS and host cell death.
Source: Research Square preprint supplement (doi:10.21203/rs.3.rs-5390645/v1), 2024-12-11
Supplement: Supplementary file 6 [file Data S7. Functional enrichment analysis of CYP1B1 immunoprecipitation (IP) datasets.xlsx]

## Sheet: Sheet1
	CYP1B1-AS1 regulates CYP1B1 to promote Coxiella burnetii pathogenesis by inhibiting ROS and host cell death.
	Arunima et al. 2024
	Data S7. Functional enrichment analysis of 3XFLAG-CYP1B1 immunoprecipitation (IP) datasets.

## Sheet: KEGG_2021_Human_new
Term	Gene_Count	Overlap	P_value	Overlap_Genes	Adjusted_P_value
Glycerophospholipid metabolism	98	20	4.26622e-07	LPGAT1, PTDSS1, PNPLA6, CEPT1, GPAT4, DGKE, CDS2, AGPAT5, SELENOI, PTDSS2, LPCAT2, MBOAT2, GNPAT, AGPAT4, PLD2, MBOAT7, GPAT3, LPCAT3, AGPAT2, CHPT1	5.54608e-06
Autophagy	137	18	0.000964124	MAP3K7, PIK3R4, PIK3R2, MTOR, ATG9A, BNIP3, STX17, RRAS2, RPTOR, NRAS, VMP1, AMBRA1, PIK3R1, PRKACB, LAMP2, PRKAA1, TBK1, MLST8	0.0062668
AMPK signaling pathway	120	12	0.0577444	MAP3K7, PFKFB2, PFKFB3, PIK3R2, CPT1A, MTOR, RPTOR, SCD, PIK3R1, PFKFB4, PCK2, PRKAA1	0.211075
Phosphatidylinositol signaling system	97	10	0.0683973	PI4KA, SACM1L, PIK3R2, DGKE, CDS2, PIK3R1, PIP5K1A, ITPR2, MTMR1, PIK3C2A	0.211075
mTOR signaling pathway	154	14	0.0811828	TELO2, TTI1, PIK3R2, MTOR, RICTOR, RPTOR, NRAS, LAMTOR1, CHUK, PIK3R1, PRKAA1, IKBKB, MLST8, MAPKAP1	0.211075
Toll-like receptor signaling pathway	104	9	0.184918	MAP3K7, PIK3R2, CHUK, RIPK1, PIK3R1, TOLLIP, IKBKB, MAP2K7, TBK1	0.400656
Apoptosis	142	11	0.253232	PIK3R2, NRAS, CHUK, RIPK1, PIK3R1, ATM, BIRC6, MCL1, IKBKB, CAPN1, ITPR2	0.470288
TNF signaling pathway	112	8	0.388181	MAP3K7, PIK3R2, CHUK, RIPK1, PIK3R1, IKBKB, TAB3, MAP2K7	0.630794
Th1 and Th2 cell differentiation	92	5	0.688802	NOTCH2, JAK1, CHUK, TYK2, IKBKB	0.919836
IL-17 signaling pathway	94	5	0.707566	MAP3K7, CHUK, IKBKB, TAB3, TBK1	0.919836
Th17 cell differentiation	107	5	0.810657	JAK1, MTOR, CHUK, TYK2, IKBKB	0.958049
MAPK signaling pathway	294	11	0.987497	MAP3K7, RRAS2, NRAS, ECSIT, DUSP9, ERBB2, CHUK, PRKACB, STK3, IKBKB, MAP2K7	0.988971
PI3K-Akt signaling pathway	354	14	0.988971	PIK3R2, JAK1, MTOR, RPTOR, NRAS, ERBB2, CHUK, PIK3R1, LAMC1, PCK2, PRKAA1, MCL1, IKBKB, MLST8	0.988971

## Sheet: GO_Molecular_Function_2023_new
Term	Gene_Count	Overlap	P_value	Overlap_Genes	Adjusted_P_value
1-Acylglycerol-3-Phosphate O-acyltransferase Activity	19	10	1.15331e-08	LPGAT1, GPAT4, AGPAT5, LPCAT2, MBOAT2, AGPAT4, MBOAT7, GPAT3, LPCAT3, AGPAT2	2.08927e-07
Lysophosphatidic Acid Acyltransferase Activity	20	10	2.19923e-08	LPGAT1, GPAT4, AGPAT5, LPCAT2, MBOAT2, AGPAT4, MBOAT7, GPAT3, LPCAT3, AGPAT2	2.08927e-07
Acylglycerol O-acyltransferase Activity	29	10	1.55253e-06	LPGAT1, GPAT4, AGPAT5, LPCAT2, MBOAT2, AGPAT4, MBOAT7, GPAT3, LPCAT3, AGPAT2	9.83268e-06
Lysophospholipid Acyltransferase Activity	8	5	2.35718e-05	LPGAT1, LPCAT2, MBOAT2, MBOAT7, LPCAT3	0.000111966
Transition Metal Ion Transmembrane Transporter Activity	33	9	4.57817e-05	SLC30A7, TMEM165, SLC39A14, ATP7B, SLC30A9, SLC39A6, SLC39A10, SLC39A11, SLC30A5	0.000173971
Zinc Ion Transmembrane Transporter Activity	23	7	0.000157501	SLC30A7, SLC39A14, SLC30A9, SLC39A6, SLC39A10, SLC39A11, SLC30A5	0.000498752
Metal Ion Transmembrane Transporter Activity	29	7	0.000758145	CNNM4, MRS2, CNNM2, TMEM165, MAGT1, SLC12A2, ITPR2	0.00205782
O-acyltransferase Activity	31	7	0.00116389	LPGAT1, GPAT4, LPCAT2, MBOAT2, MBOAT7, GPAT3, LPCAT3	0.00275579
Magnesium Ion Transmembrane Transporter Activity	10	4	0.00145042	CNNM4, MRS2, CNNM2, MAGT1	0.00275579
Purine Ribonucleotide Transmembrane Transporter Activity	10	4	0.00145042	SLC35B2, SLC25A25, SLC25A42, SLC25A17	0.00275579
Carboxylic Acid Transmembrane Transporter Activity	59	9	0.00436568	ABCC1, SLC5A6, SLC7A1, SLC6A15, SLC7A6, SLC1A4, SLC38A1, SLC7A2, SLC25A32	0.00754073
L-amino Acid Transmembrane Transporter Activity	63	9	0.00681299	SLC25A22, SLC1A3, SLC7A1, SLC25A26, SLC7A11, SLC7A6, SLC1A4, SLC38A1, SLC7A2	0.0107872
ATPase Binding	73	9	0.0174873	NCSTN, WFS1, TOR1AIP2, DERL1, PSEN1, ATP1B1, TMEM106B, PEX19, ZNHIT6	0.0255584
GTPase Binding	225	19	0.0372175	CDC42EP1, EXOC2, MYCBP2, XPO4, EXOC5, ATP6AP1, BNIP3, EXOC8, LAMTOR1, AMBRA1, HPS6, EVI5L, USP33, RHOBTB3, RAB29, RAB34, RABGGTB, MAPKAP1, MYO9B	0.0505095
Heme Binding	87	8	0.104728	CYP1B1, COX15, FLVCR1, HMOX2, CYP2S1, CYP51A1, CYB5B, RSAD1	0.132655
Oxidoreductase Activity	25	3	0.15741	CYP1B1, HMOX2, CYP2S1	0.186924
MAP Kinase Kinase Kinase Activity	19	2	0.283765	MAP3K7, RIPK1	0.317149
Protein Serine/Threonine Kinase Activity	342	19	0.533665	MAP3K7, PIK3R4, PHKG2, CDC7, ATR, MTOR, VRK2, CHUK, RIPK1, PRKACB, ATM, LMTK2, PDK3, CHEK1, STK3, PRKAA1, IKBKB, NRBP1, TBK1	0.563313
RNA Binding	1411	30	1	WDR6, FASTKD5, HEATR6, RARS2, NOM1, TRIM32, FASTKD1, QKI, SMG7, SMG5, MSI1, TFB2M, ERAL1, RNASEL, WDR75, FASTKD3, MRPL10, TBRG4, FASTKD2, GFM1, PTCD1, TRNAU1AP, APEH, UTP6, FDPS, DDX51, HERC5, TRMT2A, GOLGB1, MRPL23	1

## Sheet: GO_Cellular_Component_2023_new
Term	Gene_Count	Overlap	P_value	Overlap_Genes	Adjusted_P_value
Endoplasmic Reticulum Membrane	801	112	0.000403969	CYP1B1, SPTLC1, AUP1, SMPD4, THADA, SEL1L, PREB, NOTCH2, SLC27A4, AMFR, DNAJB12, ILVBL, ALG1, STT3B, ASPH, LPGAT1, SPTLC2, SACM1L, CDKAL1, GGCX, STX18, DHCR7, PTDSS1, ADPGK, PIGS, SLC30A7, PIGT, MLEC, OS9, PNPLA6, TMCO1, PIGG, XXYLT1, TMX3, POR, ICMT, ATG9A, CEPT1, GPAT4, MAGT1, CDS2, PLPP6, MGST3, AGPAT5, WFS1, HMOX2, PIGO, VRK2, STX17, DHCR24, ABHD12, ATP6AP2, CERS2, NRAS, FDFT1, SCD, LMAN2, DN…	0.0064635
Mitochondrial Membrane	540	79	0.00113306	SAMM50, YME1L1, RHOT2, SLC25A22, ACAD9, RHOT1, MRS2, SLC25A19, ABCB7, SFXN2, MTX2, MAIP1, TIMMDC1, MCU, OXA1L, CPT1A, RMDN3, COX15, TIMM17B, NDUFA13, EXD2, CDS2, NLRX1, FLVCR1, BNIP3, AGPAT5, ATAD1, VRK2, SLC30A9, NDUFA9, NDUFAF3, MYO19, CYC1, ECSIT, L2HGDH, RAB32, ABCB6, SLC25A21, SLC25A26, QTRT2, TMEM177, FOXRED1, PARL, PSEN2, NDUFV1, AMBRA1, TOMM70, RDH13, PSEN1, GHITM, MTX1, MRPL10, GCAT, CHC…	0.00906446
Organelle Outer Membrane	170	29	0.00687572	SAMM50, SMPD4, RHOT2, RHOT1, DHCR7, SFXN2, MTX2, CPT1A, RMDN3, EXD2, NLRX1, BNIP3, AGPAT5, ATAD1, MYO19, RAB32, QTRT2, AMBRA1, TOMM70, PSEN1, MTX1, FIS1, CYB5B, MCL1, MSTO1, AGPAT4, USP30, ITPRIP, MUL1	0.0366705
Mitochondrial Outer Membrane	151	25	0.0170176	SAMM50, RHOT2, RHOT1, SFXN2, MTX2, CPT1A, RMDN3, EXD2, NLRX1, BNIP3, AGPAT5, ATAD1, MYO19, RAB32, QTRT2, AMBRA1, TOMM70, MTX1, FIS1, CYB5B, MCL1, MSTO1, AGPAT4, USP30, MUL1	0.0588783
trans-Golgi Network Membrane	100	18	0.0183995	IGF2R, COG5, COG1, TMEM165, COG4, COG2, ATP7B, VPS52, COG6, COG8, COG3, RAB9A, APP, RHOBTB3, VPS53, ATP9A, LLGL1, STX10	0.0588783
Peroxisomal Membrane	53	11	0.0229312	FAR1, DHRS7B, PEX1, PEX3, ATAD1, FIS1, GNPAT, DECR2, PEX19, USP30, SLC25A17	0.0611499
Mitochondrial Inner Membrane	370	46	0.156201	YME1L1, SLC25A22, ACAD9, MRS2, SLC25A19, MAIP1, TIMMDC1, MCU, COX15, TIMM17B, NDUFA13, CDS2, FLVCR1, NDUFAF3, CYC1, ECSIT, L2HGDH, SLC25A21, SLC25A26, TMEM177, FOXRED1, PARL, PSEN2, NDUFV1, RDH13, PSEN1, GHITM, MRPL10, GCAT, CHCHD6, MTFP1, TIMM17A, NDUFAF4, COQ5, TMEM11, DNAJC30, MRPL38, SLC25A20, COQ2, MRPL17, OMA1, TMEM126B, SLC25A32, SCO1, ADCK1, MRPL23	0.35703
trans-Golgi Network	241	30	0.219592	SMPD4, ARFGEF1, IGF2R, COG5, ARFGEF2, COG1, TMEM165, ATP2C1, COG4, ATG9A, COG2, ATP7B, VPS52, COG6, COG8, RAB32, COG3, YIPF5, RAB9A, APP, BIRC6, RHOBTB3, RAB29, VPS53, ATP9A, ATP8B2, LLGL1, STX10, YIPF4, PIK3C2A	0.439184
Organelle Inner Membrane	398	47	0.262409	YME1L1, SLC25A22, ACAD9, MRS2, SLC25A19, MAIP1, TIMMDC1, MCU, COX15, TIMM17B, NDUFA13, CDS2, FLVCR1, NDUFAF3, CYC1, ECSIT, L2HGDH, SLC25A21, SLC25A26, TMEM177, FOXRED1, PARL, PSEN2, NDUFV1, RDH13, PSEN1, GHITM, MRPL10, GCAT, CHCHD6, MTFP1, TIMM17A, NDUFAF4, COQ5, TMEM11, DNAJC30, MRPL38, ARL6IP6, SLC25A20, COQ2, MRPL17, OMA1, TMEM126B, SLC25A32, SCO1, ADCK1, MRPL23	0.466504
Late Endosome	205	22	0.546495	IGF2R, VAC14, PIK3R4, ATG9A, SLC39A14, TMEM9, ATP7B, AP5Z1, VPS4A, EXOC8, LAMTOR1, CXCR4, RAB9A, AP5B1, STARD3NL, LAMP2, STEAP3, LGMN, TMEM59, VPS16, VPS8, ANKRD13A	0.874393
Mitochondrial Envelope	146	15	0.622759	ACAD9, OXA1L, NDUFA13, BNIP3, VRK2, SLC30A9, NDUFA9, ABCB6, TOMM70, CPOX, NDUFAF4, ABCD1, GNPAT, SLC25A20, OMA1	0.905832
Golgi Membrane	427	43	0.723786	NOTCH2, ARFGEF1, SACM1L, COG5, VAC14, ARFGEF2, CHP1, COG1, ATP2C1, COG4, B4GAT1, ATG9A, GLG1, COG2, ATP7B, COG6, COG8, CHPF, SLC35B2, NRAS, LMAN2, COG3, SLC33A1, HS2ST1, ARFGAP3, B3GAT3, CHST14, MGAT2, UBIAD1, LMAN1, VPS45, KDELR2, TMED9, SLC2A1, CHPF2, RAB36, AP1G2, IFT27, SLC30A5, UNC93B1, CHPT1, GOLGB1, GOLGA7	0.965048
Lysosomal Membrane	356	28	0.980317	NCSTN, STK11IP, TMEM165, MTOR, SPNS1, MAGT1, SLC39A14, TMEM9, TOM1, STX17, RPTOR, ATP6AP2, LAMTOR1, ABCB6, PSEN2, HPS6, PSEN1, AP5B1, STARD3NL, LAMP2, RDH14, NPC1, GAA, ABCD1, TMEM106B, VPS16, STOM, OCLN	0.998356
Endosome Membrane	361	27	0.990705	MON2, IGF2R, VAC14, NCSTN, MAP3K7, TMEM165, ATG9A, SLC39A14, SORT1, ATP6AP1, TOM1, ATP6AP2, VPS4A, LAMTOR1, ABCB6, ERBB2, RIPK1, STARD3NL, LAMP2, STEAP3, EPHA4, VPS45, ATP9A, TAB3, WASHC5, LLGL1, VPS16	0.998356
Bounding Membrane Of Organelle	819	71	0.992781	PI4KA, NOTCH2, ARFGEF1, IGF2R, SACM1L, COG5, VAC14, NCSTN, MAP3K7, ARFGEF2, CHP1, COG1, SLC30A7, TMEM165, ATP2C1, COG4, EXOC3, B4GAT1, ATG9A, GLG1, SORT1, COG2, ATP7B, ATP6AP1, COG6, COG8, TOM1, STX17, CHPF, SLC35B2, ATP6AP2, VPS4A, NRAS, LMAN2, COG3, ABCB6, SLC33A1, HS2ST1, STIM1, ERBB2, RIPK1, ARFGAP3, B3GAT3, CHST14, MGAT2, UBIAD1, STEAP3, LMAN1, VPS45, KDELR2, MOXD1, SLC18B1, TMED9, TAB3, TAP…	0.998356
Lysosome	503	37	0.998356	NCSTN, STK11IP, TMEM165, MTOR, FUCA2, SPNS1, SLC39A14, SORT1, TMEM9, STX17, RPTOR, ATP6AP2, VPS4A, LAMTOR1, ABCB6, CXCR4, RAB9A, NEU1, PSEN2, HPS6, PSEN1, AP5B1, STARD3NL, LAMP2, RDH14, NPC1, GAA, LGMN, ABCD1, TMEM106B, TPP1, TMEM97, TMEM59, VPS16, UNC93B1, GLMP, OCLN	0.998356

## Sheet: GO_Biological_Process_new
Term	Gene_Count	Overlap	P_value	Overlap_Genes	Adjusted_P_value
Glycerophospholipid Biosynthetic pathway	108	25	2.6005e-08	FAR1, PI4KA, SACM1L, VAC14, PTDSS1, CEPT1, GPAT4, DGKE, CDS2, AGPAT5, SELENOI, PTDSS2, LPCAT2, MBOAT2, GNPAT, AGPAT4, PLD2, MBOAT7, PIP5K1A, GPAT3, LPCAT3, MTMR1, AGPAT2, PIK3C2A, CHPT1	2.6005e-07
Mitochondrial and endomembrane transport pathway	1104	177	0.0278823	MON2, AUP1, SEL1L, PREB, UBAC2, DNAJB12, STT3B, COG5, ARFGEF2, STX18, MAN1B1, RINT1, CHP1, COG1, EXOC7, MTX2, EXOC2, OS9, NBAS, PIK3R2, TMCO1, MAIP1, ERLEC1, XPO4, COG4, OXA1L, TIMM17B, SORT1, EXOC5, COG2, FLVCR1, VPS52, BNIP3, COG6, EIF2B5, WFS1, COG8, STX17, QRICH1, RHBDD2, EXOC6, EXOC8, LMAN2, COG3, DERL1, GET4, TCAF1, YIPF5, RAB9A, CLGN, PSEN2, ERBB2, VMP1, PIK3R1, ARFGAP3, TOMM70, PSEN1, B3G…	0.139412
PI3K/Akt/mTOR mediated signaling pathway	781	79	0.798897	WDR6, PI4KA, LPGAT1, SACM1L, VAC14, PRKAR1A, URB2, PIK3R4, NR2F2, EXOC7, PIK3R2, PIGG, CDC7, ATR, MTOR, RICTOR, PIGO, VRK2, RPTOR, ERBB2, CHUK, RIPK1, AMBRA1, PIK3R1, PRKACB, ATM, LMTK2, DPM3, PDK3, CHEK1, UBR1, MCL1, IKBKB, TAB3, CDK5RAP3, PSMD10, MBOAT7, PIP5K1A, MEN1, MTMR1, CDK5RAP1, SLC30A5, TBK1, MLST8, PIK3C2A, PRKAR1B, HERC5, PIGA	1
Insulin signaling pathway	362	27	0.96518	SLC27A4, SLC25A22, EIF2B3, PIK3R2, MCU, SLC39A14, SORT1, EIF2B5, PSMD9, PIK3R1, EIF2B1, PDK3, EIF2B2, PCK2, PRKAA1, SLC2A1, PIK3C2A	1
Endocytic trafficking pathway	1188	115	0.990531	ARFGEF1, IGF2R, COG5, ARFGEF2, PIK3R4, EXOC7, CLN6, EXOC2, TMEM165, COG4, EXOC3, ATG9A, SORT1, EXOC5, COG2, TMEM9, VPS52, ATP6AP1, COG6, COG8, TOM1, STX17, AP5Z1, MYO1E, ATP6AP2, VPS4A, EXOC6, EXOC8, DNAJC16, LAMTOR1, COG3, HOOK1, SNAP47, SCFD2, YIPF5, RAB9A, SNX27, APP, VMP1, ARFGAP3, HPS6, AP5B1, LAMP2, LMTK2, RNF126, MGRN1, RHOBTB3, NPC1, RAB29, TMEM106B, VPS45, VPS53, ATP9A, WASHC5, RAB34, ST…	1
RNA repair and processing	659	55	0.993298	INTS1, FASTKD5, FASTKD1, NBAS, GEMIN2, QKI, INTS2, CNOT9, SMG7, INTS5, SMG5, INTS3, GEMIN6, TAF6L, INTS6, PIK3R1, ATM, FASTKD3, GEMIN8, CNOT11, TBRG4, GEMIN7, FASTKD2, CNOT3, TSEN34, PTCD1, CNOT10, INTS8, CNOT2, INTS6L, CNOT8	1
Response to Reactive oxygen species and oxidative stress	946	58	0.999991	CYP1B1, ABCB7, OXA1L, MTOR, NDUFA13, TMEM126A, BNIP3, SLC12A2, VRK2, NDUFA9, RPTOR, NDUFAF3, ECSIT, LAMTOR1, NDUFS7, TMEM161A, FOXRED1, PARL, SLC7A6, CHUK, RIPK1, TIMM21, ATM, PDK3, PLAA, LGMN, VKORC1L1, CYB5B, NDUFAF4, ABCD1, PRKAA1, PTK7, ERMP1, TMEM126B, NUBPL, GPX8, MLST8	1
Negative Regulation Of Apoptotic Signaling Pathway	1203	72	0.999999	CYP1B1, YME1L1, NOTCH2, MAP3K7, BRAT1, TRIM32, PPM1F, MTOR, ATG9A, NDUFA13, BNIP3, RICTOR, WFS1, QRICH1, DHCR24, VPS4A, ARL6IP5, SLC7A11, TMEM161A, CXCR4, APP, PSEN2, ERBB2, RIPK1, PIK3R1, TOMM70, PSEN1, ATM, BAG5, PDK1, GHITM, FEM1B, ERCC2, BIRC6, FASTKD2, CHEK1, STK3, RAB29, HDAC3, PRKAA1, MCL1, PSMD10, MEN1, BABAM2, WDR73, OMA1, TBK1, MLST8, MAPKAP1	1
MAPK/JNK Signaling pathway	694	28	1	MAP3K7, PJA2, PIK3R2, VRK2, ATP6AP2, DUSP9, LAMTOR1, APP, ERBB2, RIPK1, STK3, HDAC3, CDK5RAP3, PSMD10, MEN1, MAP2K7	1
Cytokine-Mediated Signaling Pathway	1521	41	1	CYP1B1, SMPD4, MAP3K7, PJA2, JAK1, NDUFA13, SLC12A2, CXCR4, APP, CHUK, RIPK1, TOLLIP, UBE2G2, TYK2, GLMN, APOL2, NPTN, IKBKB, MEN1, AGPAT2, PATZ1, TBK1, ELF4	1
