# Supplementary material for: CYP1B1-AS1 regulates CYP1B1 to promote Coxiella burnetii pathogenesis by inhibiting ROS and host cell death.
Source: Research Square preprint supplement (doi:10.21203/rs.3.rs-5390645/v1), 2024-12-11
Supplement: Supplementary file 7 [file Data S8. Protein-Protein Interaction Analysis in CYP1B1-IP Enrichment Datasets.xlsx]

## Sheet: Sheet1
		CYP1B1-AS1 regulates CYP1B1 to promote Coxiella burnetii pathogenesis by inhibiting ROS and host cell death.
		Arunima et al. 2024
		Data S8. Protein-Protein Interaction Analysis in 3XFLAG-CYP1B1-IP Enrichment Datasets

## Sheet: string_functional_annotations
Column1	Column2	Column3	Column4	Column5
#node	identifier	category	term ID
AASS	9606.ENSP00000403768	GO Process	GO:0000122	Negative regulation of transcription by RNA polymerase II
AASS	9606.ENSP00000403768	GO Process	GO:0006082	Organic acid metabolic process
AASS	9606.ENSP00000403768	GO Process	GO:0006084	acetyl-CoA metabolic process
AASS	9606.ENSP00000403768	GO Process	GO:0006139	Nucleobase-containing compound metabolic process
AASS	9606.ENSP00000403768	GO Process	GO:0006163	Purine nucleotide metabolic process
AASS	9606.ENSP00000403768	GO Process	GO:0006355	Regulation of transcription, DNA-templated
AASS	9606.ENSP00000403768	GO Process	GO:0006357	Regulation of transcription by RNA polymerase II
AASS	9606.ENSP00000403768	GO Process	GO:0006520	Cellular amino acid metabolic process
AASS	9606.ENSP00000403768	GO Process	GO:0006553	Lysine metabolic process
AASS	9606.ENSP00000403768	GO Process	GO:0006554	Lysine catabolic process
AASS	9606.ENSP00000403768	GO Process	GO:0006637	acyl-CoA metabolic process
AASS	9606.ENSP00000403768	GO Process	GO:0006725	Cellular aromatic compound metabolic process
AASS	9606.ENSP00000403768	GO Process	GO:0006753	Nucleoside phosphate metabolic process
AASS	9606.ENSP00000403768	GO Process	GO:0006790	Sulfur compound metabolic process
AASS	9606.ENSP00000403768	GO Process	GO:0006793	Phosphorus metabolic process
AASS	9606.ENSP00000403768	GO Process	GO:0006796	Phosphate-containing compound metabolic process
AASS	9606.ENSP00000403768	GO Process	GO:0006807	Nitrogen compound metabolic process
AASS	9606.ENSP00000403768	GO Process	GO:0008152	Metabolic process
AASS	9606.ENSP00000403768	GO Process	GO:0008652	Cellular amino acid biosynthetic process
AASS	9606.ENSP00000403768	GO Process	GO:0009056	Catabolic process
AASS	9606.ENSP00000403768	GO Process	GO:0009058	Biosynthetic process
AASS	9606.ENSP00000403768	GO Process	GO:0009063	Cellular amino acid catabolic process
AASS	9606.ENSP00000403768	GO Process	GO:0009066	Aspartate family amino acid metabolic process
AASS	9606.ENSP00000403768	GO Process	GO:0009067	Aspartate family amino acid biosynthetic process
AASS	9606.ENSP00000403768	GO Process	GO:0009068	Aspartate family amino acid catabolic process
AASS	9606.ENSP00000403768	GO Process	GO:0009085	Lysine biosynthetic process
AASS	9606.ENSP00000403768	GO Process	GO:0009117	Nucleotide metabolic process
AASS	9606.ENSP00000403768	GO Process	GO:0009150	Purine ribonucleotide metabolic process
AASS	9606.ENSP00000403768	GO Process	GO:0009259	Ribonucleotide metabolic process
AASS	9606.ENSP00000403768	GO Process	GO:0009889	Regulation of biosynthetic process
AASS	9606.ENSP00000403768	GO Process	GO:0009890	Negative regulation of biosynthetic process
AASS	9606.ENSP00000403768	GO Process	GO:0009892	Negative regulation of metabolic process
AASS	9606.ENSP00000403768	GO Process	GO:0009987	Cellular process
AASS	9606.ENSP00000403768	GO Process	GO:0010468	Regulation of gene expression
AASS	9606.ENSP00000403768	GO Process	GO:0010556	Regulation of macromolecule biosynthetic process
AASS	9606.ENSP00000403768	GO Process	GO:0010558	Negative regulation of macromolecule biosynthetic process
AASS	9606.ENSP00000403768	GO Process	GO:0010605	Negative regulation of macromolecule metabolic process
AASS	9606.ENSP00000403768	GO Process	GO:0016053	Organic acid biosynthetic process
AASS	9606.ENSP00000403768	GO Process	GO:0016054	Organic acid catabolic process
AASS	9606.ENSP00000403768	GO Process	GO:0019219	Regulation of nucleobase-containing compound metabolic process
AASS	9606.ENSP00000403768	GO Process	GO:0019222	Regulation of metabolic process
AASS	9606.ENSP00000403768	GO Process	GO:0019474	L-lysine catabolic process to acetyl-CoA
AASS	9606.ENSP00000403768	GO Process	GO:0019477	L-lysine catabolic process
AASS	9606.ENSP00000403768	GO Process	GO:0019637	Organophosphate metabolic process
AASS	9606.ENSP00000403768	GO Process	GO:0019693	Ribose phosphate metabolic process
AASS	9606.ENSP00000403768	GO Process	GO:0019752	Carboxylic acid metabolic process
AASS	9606.ENSP00000403768	GO Process	GO:0019878	Lysine biosynthetic process via aminoadipic acid
AASS	9606.ENSP00000403768	GO Process	GO:0031056	Regulation of histone modification
AASS	9606.ENSP00000403768	GO Process	GO:0031057	Negative regulation of histone modification
AASS	9606.ENSP00000403768	GO Process	GO:0031060	Regulation of histone methylation
AASS	9606.ENSP00000403768	GO Process	GO:0031061	Negative regulation of histone methylation
AASS	9606.ENSP00000403768	GO Process	GO:0031323	Regulation of cellular metabolic process
AASS	9606.ENSP00000403768	GO Process	GO:0031324	Negative regulation of cellular metabolic process
AASS	9606.ENSP00000403768	GO Process	GO:0031326	Regulation of cellular biosynthetic process
AASS	9606.ENSP00000403768	GO Process	GO:0031327	Negative regulation of cellular biosynthetic process
AASS	9606.ENSP00000403768	GO Process	GO:0031399	Regulation of protein modification process
AASS	9606.ENSP00000403768	GO Process	GO:0031400	Negative regulation of protein modification process
AASS	9606.ENSP00000403768	GO Process	GO:0033512	L-lysine catabolic process to acetyl-CoA via saccharopine
AASS	9606.ENSP00000403768	GO Process	GO:0033865	Nucleoside bisphosphate metabolic process
AASS	9606.ENSP00000403768	GO Process	GO:0033875	Ribonucleoside bisphosphate metabolic process
AASS	9606.ENSP00000403768	GO Process	GO:0034032	Purine nucleoside bisphosphate metabolic process
AASS	9606.ENSP00000403768	GO Process	GO:0034641	Cellular nitrogen compound metabolic process
AASS	9606.ENSP00000403768	GO Process	GO:0035383	Thioester metabolic process
AASS	9606.ENSP00000403768	GO Process	GO:0043436	Oxoacid metabolic process
AASS	9606.ENSP00000403768	GO Process	GO:0043603	Cellular amide metabolic process
AASS	9606.ENSP00000403768	GO Process	GO:0044237	Cellular metabolic process
AASS	9606.ENSP00000403768	GO Process	GO:0044238	Primary metabolic process
AASS	9606.ENSP00000403768	GO Process	GO:0044248	Cellular catabolic process
AASS	9606.ENSP00000403768	GO Process	GO:0044249	Cellular biosynthetic process
AASS	9606.ENSP00000403768	GO Process	GO:0044281	Small molecule metabolic process
AASS	9606.ENSP00000403768	GO Process	GO:0044282	Small molecule catabolic process
AASS	9606.ENSP00000403768	GO Process	GO:0044283	Small molecule biosynthetic process
AASS	9606.ENSP00000403768	GO Process	GO:0045892	Negative regulation of transcription, DNA-templated
AASS	9606.ENSP00000403768	GO Process	GO:0045934	Negative regulation of nucleobase-containing compound metabolic process
AASS	9606.ENSP00000403768	GO Process	GO:0046394	Carboxylic acid biosynthetic process
AASS	9606.ENSP00000403768	GO Process	GO:0046395	Carboxylic acid catabolic process
AASS	9606.ENSP00000403768	GO Process	GO:0046440	L-lysine metabolic process
AASS	9606.ENSP00000403768	GO Process	GO:0046483	Heterocycle metabolic process
AASS	9606.ENSP00000403768	GO Process	GO:0048519	Negative regulation of biological process
AASS	9606.ENSP00000403768	GO Process	GO:0048523	Negative regulation of cellular process
AASS	9606.ENSP00000403768	GO Process	GO:0050789	Regulation of biological process
AASS	9606.ENSP00000403768	GO Process	GO:0050794	Regulation of cellular process
AASS	9606.ENSP00000403768	GO Process	GO:0051171	Regulation of nitrogen compound metabolic process
AASS	9606.ENSP00000403768	GO Process	GO:0051172	Negative regulation of nitrogen compound metabolic process
AASS	9606.ENSP00000403768	GO Process	GO:0051246	Regulation of protein metabolic process
AASS	9606.ENSP00000403768	GO Process	GO:0051248	Negative regulation of protein metabolic process
AASS	9606.ENSP00000403768	GO Process	GO:0051252	Regulation of RNA metabolic process
AASS	9606.ENSP00000403768	GO Process	GO:0051253	Negative regulation of RNA metabolic process
AASS	9606.ENSP00000403768	GO Process	GO:0055086	Nucleobase-containing small molecule metabolic process
AASS	9606.ENSP00000403768	GO Process	GO:0060255	Regulation of macromolecule metabolic process
AASS	9606.ENSP00000403768	GO Process	GO:0065007	Biological regulation
AASS	9606.ENSP00000403768	GO Process	GO:0071704	Organic substance metabolic process
AASS	9606.ENSP00000403768	GO Process	GO:0072521	Purine-containing compound metabolic process
AASS	9606.ENSP00000403768	GO Process	GO:0080090	Regulation of primary metabolic process
AASS	9606.ENSP00000403768	GO Process	GO:1901135	Carbohydrate derivative metabolic process
AASS	9606.ENSP00000403768	GO Process	GO:1901360	Organic cyclic compound metabolic process
AASS	9606.ENSP00000403768	GO Process	GO:1901564	Organonitrogen compound metabolic process
AASS	9606.ENSP00000403768	GO Process	GO:1901565	Organonitrogen compound catabolic process
AASS	9606.ENSP00000403768	GO Process	GO:1901566	Organonitrogen compound biosynthetic process
AASS	9606.ENSP00000403768	GO Process	GO:1901575	Organic substance catabolic process
AASS	9606.ENSP00000403768	GO Process	GO:1901576	Organic substance biosynthetic process
AASS	9606.ENSP00000403768	GO Process	GO:1901605	Alpha-amino acid metabolic process
AASS	9606.ENSP00000403768	GO Process	GO:1901606	Alpha-amino acid catabolic process
AASS	9606.ENSP00000403768	GO Process	GO:1901607	Alpha-amino acid biosynthetic process
AASS	9606.ENSP00000403768	GO Process	GO:1902679	Negative regulation of RNA biosynthetic process
AASS	9606.ENSP00000403768	GO Process	GO:1903506	Regulation of nucleic acid-templated transcription
AASS	9606.ENSP00000403768	GO Process	GO:1903507	Negative regulation of nucleic acid-templated transcription
AASS	9606.ENSP00000403768	GO Process	GO:2001141	Regulation of RNA biosynthetic process
AASS	9606.ENSP00000403768	GO Function	GO:0003712	Transcription coregulator activity
AASS	9606.ENSP00000403768	GO Function	GO:0003714	Transcription corepressor activity
AASS	9606.ENSP00000403768	GO Function	GO:0003824	Catalytic activity
AASS	9606.ENSP00000403768	GO Function	GO:0004753	Saccharopine dehydrogenase activity
AASS	9606.ENSP00000403768	GO Function	GO:0004754	Saccharopine dehydrogenase (NAD+, L-lysine-forming) activity
AASS	9606.ENSP00000403768	GO Function	GO:0005488	Binding
AASS	9606.ENSP00000403768	GO Function	GO:0005515	Protein binding
AASS	9606.ENSP00000403768	GO Function	GO:0016491	Oxidoreductase activity
AASS	9606.ENSP00000403768	GO Function	GO:0016645	Oxidoreductase activity, acting on the CH-NH group of donors
AASS	9606.ENSP00000403768	GO Function	GO:0016646	Oxidoreductase activity, acting on the CH-NH group of donors, NAD or NADP as acceptor
AASS	9606.ENSP00000403768	GO Function	GO:0042393	Histone binding
AASS	9606.ENSP00000403768	GO Function	GO:0047130	Saccharopine dehydrogenase (NADP+, L-lysine-forming) activity
AASS	9606.ENSP00000403768	GO Function	GO:0047131	Saccharopine dehydrogenase (NAD+, L-glutamate-forming) activity
AASS	9606.ENSP00000403768	GO Function	GO:0140110	Transcription regulator activity
AASS	9606.ENSP00000403768	GO Component	GO:0005622	Intracellular anatomical structure
AASS	9606.ENSP00000403768	GO Component	GO:0005634	Nucleus
AASS	9606.ENSP00000403768	GO Component	GO:0005737	Cytoplasm
AASS	9606.ENSP00000403768	GO Component	GO:0005739	Mitochondrion
AASS	9606.ENSP00000403768	GO Component	GO:0005759	Mitochondrial matrix
AASS	9606.ENSP00000403768	GO Component	GO:0005829	Cytosol
AASS	9606.ENSP00000403768	GO Component	GO:0031974	Membrane-enclosed lumen
AASS	9606.ENSP00000403768	GO Component	GO:0043226	Organelle
AASS	9606.ENSP00000403768	GO Component	GO:0043227	Membrane-bounded organelle
AASS	9606.ENSP00000403768	GO Component	GO:0043229	Intracellular organelle
AASS	9606.ENSP00000403768	GO Component	GO:0043231	Intracellular membrane-bounded organelle
AASS	9606.ENSP00000403768	GO Component	GO:0043233	Organelle lumen
AASS	9606.ENSP00000403768	GO Component	GO:0070013	Intracellular organelle lumen
AASS	9606.ENSP00000403768	GO Component	GO:0110165	Cellular anatomical entity
AASS	9606.ENSP00000403768	STRING clusters	CL:9060	Mixed, incl. Glutamine family amino acid metabolic process, and Hydantoinase/dihydropyrimidinase
AASS	9606.ENSP00000403768	STRING clusters	CL:9062	Mixed, incl. Glutamine family amino acid biosynthetic process, and Metal-dependent hydrolase, composite domain superfamily
AASS	9606.ENSP00000403768	KEGG	hsa00310	Lysine degradation
AASS	9606.ENSP00000403768	KEGG	hsa01100	Metabolic pathways
AASS	9606.ENSP00000403768	Reactome	HSA-1430728	Metabolism
AASS	9606.ENSP00000403768	Reactome	HSA-71064	Lysine catabolism
AASS	9606.ENSP00000403768	Reactome	HSA-71291	Metabolism of amino acids and derivatives
AASS	9606.ENSP00000403768	DISEASES	DOID:0014667	Disease of metabolism
AASS	9606.ENSP00000403768	DISEASES	DOID:4	Disease
AASS	9606.ENSP00000403768	DISEASES	DOID:630	Genetic disease
AASS	9606.ENSP00000403768	DISEASES	DOID:655	Inherited metabolic disorder
AASS	9606.ENSP00000403768	DISEASES	DOID:9252	Amino acid metabolic disorder
AASS	9606.ENSP00000403768	DISEASES	DOID:9274	Hyperlysinemia
AASS	9606.ENSP00000403768	TISSUES	BTO:0000000	Tissues, cell types and enzyme sources
AASS	9606.ENSP00000403768	TISSUES	BTO:0000042	Animal
AASS	9606.ENSP00000403768	TISSUES	BTO:0000058	Alimentary canal
AASS	9606.ENSP00000403768	TISSUES	BTO:0000227	Central nervous system
AASS	9606.ENSP00000403768	TISSUES	BTO:0000345	Digestive gland
AASS	9606.ENSP00000403768	TISSUES	BTO:0000497	Ganglion
AASS	9606.ENSP00000403768	TISSUES	BTO:0000511	Gastrointestinal tract
AASS	9606.ENSP00000403768	TISSUES	BTO:0000522	Gland
AASS	9606.ENSP00000403768	TISSUES	BTO:0000648	Intestine
AASS	9606.ENSP00000403768	TISSUES	BTO:0000706	Large intestine
AASS	9606.ENSP00000403768	TISSUES	BTO:0000759	Liver
AASS	9606.ENSP00000403768	TISSUES	BTO:0001158	Rectum
AASS	9606.ENSP00000403768	TISSUES	BTO:0001484	Nervous system
AASS	9606.ENSP00000403768	TISSUES	BTO:0001488	Endocrine gland
AASS	9606.ENSP00000403768	TISSUES	BTO:0001489	Whole body
AASS	9606.ENSP00000403768	TISSUES	BTO:0001491	Viscus
AASS	9606.ENSP00000403768	TISSUES	BTO:0001613	Colorectum
AASS	9606.ENSP00000403768	TISSUES	BTO:0001871	Synganglion
AASS	9606.ENSP00000403768	TISSUES	BTO:0004694	Rectal sac
AASS	9606.ENSP00000403768	COMPARTMENTS	GOCC:0005622	Intracellular
AASS	9606.ENSP00000403768	COMPARTMENTS	GOCC:0005737	Cytoplasm
AASS	9606.ENSP00000403768	COMPARTMENTS	GOCC:0005739	Mitochondrion
AASS	9606.ENSP00000403768	COMPARTMENTS	GOCC:0043226	Organelle
AASS	9606.ENSP00000403768	COMPARTMENTS	GOCC:0043227	Membrane-bounded organelle
AASS	9606.ENSP00000403768	COMPARTMENTS	GOCC:0043229	Intracellular organelle
AASS	9606.ENSP00000403768	COMPARTMENTS	GOCC:0043231	Intracellular membrane-bounded organelle
AASS	9606.ENSP00000403768	COMPARTMENTS	GOCC:0110165	Cellular anatomical entity
AASS	9606.ENSP00000403768	Monarch	HP:0000002	Abnormality of body height
AASS	9606.ENSP00000403768	Monarch	HP:0000079	Abnormality of the urinary system
AASS	9606.ENSP00000403768	Monarch	HP:0000118	Phenotypic abnormality
AASS	9606.ENSP00000403768	Monarch	HP:0000119	Abnormality of the genitourinary system
AASS	9606.ENSP00000403768	Monarch	HP:0000152	Abnormality of head or neck
AASS	9606.ENSP00000403768	Monarch	HP:0000153	Abnormality of the mouth
AASS	9606.ENSP00000403768	Monarch	HP:0000159	Abnormal lip morphology
AASS	9606.ENSP00000403768	Monarch	HP:0000163	Abnormal oral cavity morphology
AASS	9606.ENSP00000403768	Monarch	HP:0000174	Abnormal palate morphology
AASS	9606.ENSP00000403768	Monarch	HP:0000177	Abnormal upper lip morphology
AASS	9606.ENSP00000403768	Monarch	HP:0000218	High palate
AASS	9606.ENSP00000403768	Monarch	HP:0000234	Abnormality of the head
AASS	9606.ENSP00000403768	Monarch	HP:0000235	Abnormality of the fontanelles or cranial sutures
AASS	9606.ENSP00000403768	Monarch	HP:0000240	Abnormality of skull size
AASS	9606.ENSP00000403768	Monarch	HP:0000252	Microcephaly
AASS	9606.ENSP00000403768	Monarch	HP:0000271	Abnormality of the face
AASS	9606.ENSP00000403768	Monarch	HP:0000288	Abnormality of the philtrum
AASS	9606.ENSP00000403768	Monarch	HP:0000315	Abnormality of the orbital region
AASS	9606.ENSP00000403768	Monarch	HP:0000319	Smooth philtrum
AASS	9606.ENSP00000403768	Monarch	HP:0000356	Abnormality of the outer ear
AASS	9606.ENSP00000403768	Monarch	HP:0000366	Abnormality of the nose
AASS	9606.ENSP00000403768	Monarch	HP:0000377	Abnormal pinna morphology
AASS	9606.ENSP00000403768	Monarch	HP:0000457	Depressed nasal ridge
AASS	9606.ENSP00000403768	Monarch	HP:0000478	Abnormality of the eye
AASS	9606.ENSP00000403768	Monarch	HP:0000486	Strabismus
AASS	9606.ENSP00000403768	Monarch	HP:0000496	Abnormality of eye movement
AASS	9606.ENSP00000403768	Monarch	HP:0000511	Vertical supranuclear gaze palsy
AASS	9606.ENSP00000403768	Monarch	HP:0000517	Abnormal lens morphology
AASS	9606.ENSP00000403768	Monarch	HP:0000534	Abnormal eyebrow morphology
AASS	9606.ENSP00000403768	Monarch	HP:0000549	Abnormal conjugate eye movement
AASS	9606.ENSP00000403768	Monarch	HP:0000598	Abnormality of the ear
AASS	9606.ENSP00000403768	Monarch	HP:0000601	Hypotelorism
AASS	9606.ENSP00000403768	Monarch	HP:0000605	Supranuclear gaze palsy
AASS	9606.ENSP00000403768	Monarch	HP:0000707	Abnormality of the nervous system
AASS	9606.ENSP00000403768	Monarch	HP:0000708	Behavioral abnormality
AASS	9606.ENSP00000403768	Monarch	HP:0000736	Short attention span
AASS	9606.ENSP00000403768	Monarch	HP:0000750	Delayed speech and language development
AASS	9606.ENSP00000403768	Monarch	HP:0000752	Hyperactivity
AASS	9606.ENSP00000403768	Monarch	HP:0000924	Abnormality of the skeletal system
AASS	9606.ENSP00000403768	Monarch	HP:0000929	Abnormal skull morphology
AASS	9606.ENSP00000403768	Monarch	HP:0001083	Ectopia lentis
AASS	9606.ENSP00000403768	Monarch	HP:0001249	Intellectual disability
AASS	9606.ENSP00000403768	Monarch	HP:0001250	Seizure
AASS	9606.ENSP00000403768	Monarch	HP:0001251	Ataxia
AASS	9606.ENSP00000403768	Monarch	HP:0001252	Hypotonia
AASS	9606.ENSP00000403768	Monarch	HP:0001256	Intellectual disability, mild
AASS	9606.ENSP00000403768	Monarch	HP:0001257	Spasticity
AASS	9606.ENSP00000403768	Monarch	HP:0001263	Global developmental delay
AASS	9606.ENSP00000403768	Monarch	HP:0001264	Spastic diplegia
AASS	9606.ENSP00000403768	Monarch	HP:0001276	Hypertonia
AASS	9606.ENSP00000403768	Monarch	HP:0001285	Spastic tetraparesis
AASS	9606.ENSP00000403768	Monarch	HP:0001288	Gait disturbance
AASS	9606.ENSP00000403768	Monarch	HP:0001310	Dysmetria
AASS	9606.ENSP00000403768	Monarch	HP:0001311	Abnormal nervous system electrophysiology
AASS	9606.ENSP00000403768	Monarch	HP:0001337	Tremor
AASS	9606.ENSP00000403768	Monarch	HP:0001347	Hyperreflexia
AASS	9606.ENSP00000403768	Monarch	HP:0001348	Brisk reflexes
AASS	9606.ENSP00000403768	Monarch	HP:0001363	Craniosynostosis
AASS	9606.ENSP00000403768	Monarch	HP:0001507	Growth abnormality
AASS	9606.ENSP00000403768	Monarch	HP:0001508	Failure to thrive
AASS	9606.ENSP00000403768	Monarch	HP:0001510	Growth delay
AASS	9606.ENSP00000403768	Monarch	HP:0001574	Abnormality of the integument
AASS	9606.ENSP00000403768	Monarch	HP:0001595	Abnormal hair morphology
AASS	9606.ENSP00000403768	Monarch	HP:0001626	Abnormality of the cardiovascular system
AASS	9606.ENSP00000403768	Monarch	HP:0001871	Abnormality of blood and blood-forming tissues
AASS	9606.ENSP00000403768	Monarch	HP:0001877	Abnormal erythrocyte morphology
AASS	9606.ENSP00000403768	Monarch	HP:0001903	Anemia
AASS	9606.ENSP00000403768	Monarch	HP:0001939	Abnormality of metabolism/homeostasis
AASS	9606.ENSP00000403768	Monarch	HP:0001987	Hyperammonemia
AASS	9606.ENSP00000403768	Monarch	HP:0001999	Abnormal facial shape
AASS	9606.ENSP00000403768	Monarch	HP:0002011	Morphological central nervous system abnormality
AASS	9606.ENSP00000403768	Monarch	HP:0002013	Vomiting
AASS	9606.ENSP00000403768	Monarch	HP:0002015	Dysphagia
AASS	9606.ENSP00000403768	Monarch	HP:0002017	Nausea and vomiting
AASS	9606.ENSP00000403768	Monarch	HP:0002020	Gastroesophageal reflux
AASS	9606.ENSP00000403768	Monarch	HP:0002033	Poor suck
AASS	9606.ENSP00000403768	Monarch	HP:0002060	Abnormal cerebral morphology
AASS	9606.ENSP00000403768	Monarch	HP:0002086	Abnormality of the respiratory system
AASS	9606.ENSP00000403768	Monarch	HP:0002088	Abnormal lung morphology
AASS	9606.ENSP00000403768	Monarch	HP:0002090	Pneumonia
AASS	9606.ENSP00000403768	Monarch	HP:0002157	Azotemia
AASS	9606.ENSP00000403768	Monarch	HP:0002161	Hyperlysinemia
AASS	9606.ENSP00000403768	Monarch	HP:0002167	Neurological speech impairment
AASS	9606.ENSP00000403768	Monarch	HP:0002179	Opisthotonus
AASS	9606.ENSP00000403768	Monarch	HP:0002205	Recurrent respiratory infections
AASS	9606.ENSP00000403768	Monarch	HP:0002273	Tetraparesis
AASS	9606.ENSP00000403768	Monarch	HP:0002275	Poor motor coordination
AASS	9606.ENSP00000403768	Monarch	HP:0002311	Incoordination
AASS	9606.ENSP00000403768	Monarch	HP:0002312	Clumsiness
AASS	9606.ENSP00000403768	Monarch	HP:0002353	EEG abnormality
AASS	9606.ENSP00000403768	Monarch	HP:0002373	Febrile seizure (within the age range of 3 months to 6 years)
AASS	9606.ENSP00000403768	Monarch	HP:0002463	Language impairment
AASS	9606.ENSP00000403768	Monarch	HP:0002493	Upper motor neuron dysfunction
AASS	9606.ENSP00000403768	Monarch	HP:0002597	Abnormality of the vasculature
AASS	9606.ENSP00000403768	Monarch	HP:0002683	Abnormal calvaria morphology
AASS	9606.ENSP00000403768	Monarch	HP:0002715	Abnormality of the immune system
AASS	9606.ENSP00000403768	Monarch	HP:0002719	Recurrent infections
AASS	9606.ENSP00000403768	Monarch	HP:0002783	Recurrent lower respiratory tract infections
AASS	9606.ENSP00000403768	Monarch	HP:0002921	Abnormal cerebrospinal fluid morphology
AASS	9606.ENSP00000403768	Monarch	HP:0002927	Histidinuria
AASS	9606.ENSP00000403768	Monarch	HP:0002977	Aplasia/Hypoplasia involving the central nervous system
AASS	9606.ENSP00000403768	Monarch	HP:0003011	Abnormality of the musculature
AASS	9606.ENSP00000403768	Monarch	HP:0003110	Abnormality of urine homeostasis
AASS	9606.ENSP00000403768	Monarch	HP:0003112	Abnormal circulating amino acid concentration
AASS	9606.ENSP00000403768	Monarch	HP:0003131	Cystinuria
AASS	9606.ENSP00000403768	Monarch	HP:0003268	Argininuria
AASS	9606.ENSP00000403768	Monarch	HP:0003297	Hyperlysinuria
AASS	9606.ENSP00000403768	Monarch	HP:0003355	Aminoaciduria
AASS	9606.ENSP00000403768	Monarch	HP:0003808	Abnormal muscle tone
AASS	9606.ENSP00000403768	Monarch	HP:0004305	Involuntary movements
AASS	9606.ENSP00000403768	Monarch	HP:0004322	Short stature
AASS	9606.ENSP00000403768	Monarch	HP:0004323	Abnormality of body weight
AASS	9606.ENSP00000403768	Monarch	HP:0004325	Decreased body weight
AASS	9606.ENSP00000403768	Monarch	HP:0004328	Abnormal anterior eye segment morphology
AASS	9606.ENSP00000403768	Monarch	HP:0004354	Abnormal circulating carboxylic acid concentration
AASS	9606.ENSP00000403768	Monarch	HP:0004364	Abnormal circulating nitrogen compound concentration
AASS	9606.ENSP00000403768	Monarch	HP:0004414	Abnormality of the pulmonary artery
AASS	9606.ENSP00000403768	Monarch	HP:0004930	Abnormality of the pulmonary vasculature
AASS	9606.ENSP00000403768	Monarch	HP:0004971	Pulmonary artery hypoplasia
AASS	9606.ENSP00000403768	Monarch	HP:0005105	Abnormal nasal morphology
AASS	9606.ENSP00000403768	Monarch	HP:0006532	Recurrent pneumonia
AASS	9606.ENSP00000403768	Monarch	HP:0006889	Intellectual disability, borderline
AASS	9606.ENSP00000403768	Monarch	HP:0007364	Aplasia/Hypoplasia of the cerebrum
AASS	9606.ENSP00000403768	Monarch	HP:0008589	Hypoplastic helices
AASS	9606.ENSP00000403768	Monarch	HP:0008872	Feeding difficulties in infancy
AASS	9606.ENSP00000403768	Monarch	HP:0008947	Infantile muscular hypotonia
AASS	9606.ENSP00000403768	Monarch	HP:0009121	Abnormal axial skeleton morphology
AASS	9606.ENSP00000403768	Monarch	HP:0009738	Abnormal antihelix morphology
AASS	9606.ENSP00000403768	Monarch	HP:0009739	Hypoplasia of the antihelix
AASS	9606.ENSP00000403768	Monarch	HP:0010549	Weakness due to upper motor neuron dysfunction
AASS	9606.ENSP00000403768	Monarch	HP:0010850	EEG with spike-wave complexes
AASS	9606.ENSP00000403768	Monarch	HP:0010899	Abnormal circulating aspartate family amino acid concentration
AASS	9606.ENSP00000403768	Monarch	HP:0010908	Abnormal circulating lysine concentration
AASS	9606.ENSP00000403768	Monarch	HP:0010938	Abnormal external nose morphology
AASS	9606.ENSP00000403768	Monarch	HP:0010978	Abnormality of immune system physiology
AASS	9606.ENSP00000403768	Monarch	HP:0011024	Abnormality of the gastrointestinal tract
AASS	9606.ENSP00000403768	Monarch	HP:0011039	Abnormal helix morphology
AASS	9606.ENSP00000403768	Monarch	HP:0011119	Abnormal nasal dorsum morphology
AASS	9606.ENSP00000403768	Monarch	HP:0011138	Abnormality of skin adnexa morphology
AASS	9606.ENSP00000403768	Monarch	HP:0011171	Simple febrile seizure
AASS	9606.ENSP00000403768	Monarch	HP:0011182	Interictal epileptiform activity
AASS	9606.ENSP00000403768	Monarch	HP:0011198	EEG with generalized epileptiform discharges
AASS	9606.ENSP00000403768	Monarch	HP:0011277	Abnormality of the urinary system physiology
AASS	9606.ENSP00000403768	Monarch	HP:0011329	Abnormality of cranial sutures
AASS	9606.ENSP00000403768	Monarch	HP:0011342	Mild global developmental delay
AASS	9606.ENSP00000403768	Monarch	HP:0011442	Abnormal central motor function
AASS	9606.ENSP00000403768	Monarch	HP:0011443	Abnormality of coordination
AASS	9606.ENSP00000403768	Monarch	HP:0011446	Abnormality of higher mental function
AASS	9606.ENSP00000403768	Monarch	HP:0011458	Abdominal symptom
AASS	9606.ENSP00000403768	Monarch	HP:0011804	Abnormal muscle physiology
AASS	9606.ENSP00000403768	Monarch	HP:0011842	Abnormal skeletal morphology
AASS	9606.ENSP00000403768	Monarch	HP:0011947	Respiratory tract infection
AASS	9606.ENSP00000403768	Monarch	HP:0011968	Feeding difficulties
AASS	9606.ENSP00000403768	Monarch	HP:0012025	Abnormal circulating ornithine concentration
AASS	9606.ENSP00000403768	Monarch	HP:0012252	Abnormal respiratory system morphology
AASS	9606.ENSP00000403768	Monarch	HP:0012372	Abnormal eye morphology
AASS	9606.ENSP00000403768	Monarch	HP:0012373	Abnormal eye physiology
AASS	9606.ENSP00000403768	Monarch	HP:0012379	Abnormal enzyme/coenzyme activity
AASS	9606.ENSP00000403768	Monarch	HP:0012401	Abnormal urine alpha-ketoglutarate concentration
AASS	9606.ENSP00000403768	Monarch	HP:0012403	Decreased urine alpha-ketoglutarate concentration
AASS	9606.ENSP00000403768	Monarch	HP:0012443	Abnormality of brain morphology
AASS	9606.ENSP00000403768	Monarch	HP:0012638	Abnormal nervous system physiology
AASS	9606.ENSP00000403768	Monarch	HP:0012639	Abnormal nervous system morphology
AASS	9606.ENSP00000403768	Monarch	HP:0012647	Abnormal inflammatory response
AASS	9606.ENSP00000403768	Monarch	HP:0012649	Increased inflammatory response
AASS	9606.ENSP00000403768	Monarch	HP:0012719	Functional abnormality of the gastrointestinal tract
AASS	9606.ENSP00000403768	Monarch	HP:0012758	Neurodevelopmental delay
AASS	9606.ENSP00000403768	Monarch	HP:0012759	Neurodevelopmental abnormality
AASS	9606.ENSP00000403768	Monarch	HP:0025015	Abnormal vascular morphology
AASS	9606.ENSP00000403768	Monarch	HP:0025031	Abnormality of the digestive system
AASS	9606.ENSP00000403768	Monarch	HP:0025032	Abnormality of digestive system physiology
AASS	9606.ENSP00000403768	Monarch	HP:0025270	Abnormal esophagus physiology
AASS	9606.ENSP00000403768	Monarch	HP:0025331	Upgaze palsy
AASS	9606.ENSP00000403768	Monarch	HP:0025356	Obsolete Psychomotor retardation
AASS	9606.ENSP00000403768	Monarch	HP:0025373	Interictal EEG abnormality
AASS	9606.ENSP00000403768	Monarch	HP:0025454	Abnormal CSF metabolite concentration
AASS	9606.ENSP00000403768	Monarch	HP:0030051	Tip-toe gait
AASS	9606.ENSP00000403768	Monarch	HP:0030178	Abnormality of central nervous system electrophysiology
AASS	9606.ENSP00000403768	Monarch	HP:0030182	Tetraplegia/tetraparesis
AASS	9606.ENSP00000403768	Monarch	HP:0030669	Abnormal ocular adnexa morphology
AASS	9606.ENSP00000403768	Monarch	HP:0030680	Abnormality of cardiovascular system morphology
AASS	9606.ENSP00000403768	Monarch	HP:0030962	Abnormal morphology of the great vessels
AASS	9606.ENSP00000403768	Monarch	HP:0030966	Abnormal pulmonary artery morphology
AASS	9606.ENSP00000403768	Monarch	HP:0031703	Abnormal ear morphology
AASS	9606.ENSP00000403768	Monarch	HP:0031816	Abnormal oral morphology
AASS	9606.ENSP00000403768	Monarch	HP:0031826	Abnormal reflex
AASS	9606.ENSP00000403768	Monarch	HP:0031867	Neck hypertonia
AASS	9606.ENSP00000403768	Monarch	HP:0032039	Abnormality of the ocular adnexa
AASS	9606.ENSP00000403768	Monarch	HP:0032101	Unusual infection
AASS	9606.ENSP00000403768	Monarch	HP:0032180	Abnormal circulating metabolite concentration
AASS	9606.ENSP00000403768	Monarch	HP:0032397	Citrullinuria
AASS	9606.ENSP00000403768	Monarch	HP:0032892	Infection-related seizure
AASS	9606.ENSP00000403768	Monarch	HP:0032894	Seizure precipitated by febrile infection
AASS	9606.ENSP00000403768	Monarch	HP:0033093	Increased glutamine family amino acid level in urine
AASS	9606.ENSP00000403768	Monarch	HP:0033095	Increased sulfur amino acid level in urine
AASS	9606.ENSP00000403768	Monarch	HP:0033096	Increased aspartate family amino acid level in urine
AASS	9606.ENSP00000403768	Monarch	HP:0033098	Increased urinary non-proteinogenic amino acid level
AASS	9606.ENSP00000403768	Monarch	HP:0033100	Increased proteinogenic amino acid level in urine
AASS	9606.ENSP00000403768	Monarch	HP:0033107	Abnormal circulating proteinogenic amino acid concentration
AASS	9606.ENSP00000403768	Monarch	HP:0033109	Abnormal circulating non-proteinogenic amino acid concentration
AASS	9606.ENSP00000403768	Monarch	HP:0033127	Abnormality of the musculoskeletal system
AASS	9606.ENSP00000403768	Monarch	HP:0033353	Abnormal blood vessel morphology
AASS	9606.ENSP00000403768	Monarch	HP:0033354	Abnormal urine metabolite level
AASS	9606.ENSP00000403768	Monarch	HP:0033454	Tube feeding
AASS	9606.ENSP00000403768	Monarch	HP:0034353	Appendicular spasticity
AASS	9606.ENSP00000403768	Monarch	HP:0040195	Decreased head circumference
AASS	9606.ENSP00000403768	Monarch	HP:0040288	Nasogastric tube feeding
AASS	9606.ENSP00000403768	Monarch	HP:0045074	Thin eyebrow
AASS	9606.ENSP00000403768	Monarch	HP:0100022	Abnormality of movement
AASS	9606.ENSP00000403768	Monarch	HP:0100543	Cognitive impairment
AASS	9606.ENSP00000403768	Monarch	HP:0100547	Abnormal forebrain morphology
AASS	9606.ENSP00000403768	Monarch	HP:0100840	Aplasia/Hypoplasia of the eyebrow
AASS	9606.ENSP00000403768	Monarch	HP:0100886	Abnormality of globe location
AASS	9606.ENSP00000403768	Monarch	HP:0500163	Hypoornithinemia
AASS	9606.ENSP00000403768	Monarch	HP:0500183	Abnormal CSF carboxylic acid concentration
AASS	9606.ENSP00000403768	Monarch	HP:0500184	Abnormal CSF amino acid concentration
AASS	9606.ENSP00000403768	Monarch	HP:0500195	Abnormal CSF glutamine family amino acid concentration
AASS	9606.ENSP00000403768	Monarch	HP:0500202	Abnormal CSF arginine concentration
AASS	9606.ENSP00000403768	Monarch	HP:0500204	Decreased CSF arginine concentration
AASS	9606.ENSP00000403768	Monarch	HP:0500205	Abnormal CSF aspartate family amino acid concentration
AASS	9606.ENSP00000403768	Monarch	HP:0500206	Abnormal CSF lysine concentration
AASS	9606.ENSP00000403768	Monarch	HP:0500208	Increased CSF lysine concentration
AASS	9606.ENSP00000403768	Monarch	HP:0500243	Abnormal CSF ornithine concentration
AASS	9606.ENSP00000403768	UniProt Keywords	KW-0007	Acetylation
AASS	9606.ENSP00000403768	UniProt Keywords	KW-0496	Mitochondrion
AASS	9606.ENSP00000403768	UniProt Keywords	KW-0511	Multifunctional enzyme
AASS	9606.ENSP00000403768	UniProt Keywords	KW-0520	NAD
AASS	9606.ENSP00000403768	UniProt Keywords	KW-0521	NADP
AASS	9606.ENSP00000403768	UniProt Keywords	KW-0560	Oxidoreductase
AASS	9606.ENSP00000403768	UniProt Keywords	KW-0809	Transit peptide
AASS	9606.ENSP00000403768	Pfam	PF03435	Saccharopine dehydrogenase NADP binding domain
AASS	9606.ENSP00000403768	Pfam	PF16653	Saccharopine dehydrogenase C-terminal domain
AASS	9606.ENSP00000403768	InterPro	IPR005097	Saccharopine dehydrogenase, NADP binding domain
AASS	9606.ENSP00000403768	InterPro	IPR007698	Alanine dehydrogenase/pyridine nucleotide transhydrogenase, NAD(H)-binding domain
AASS	9606.ENSP00000403768	InterPro	IPR007886	Alanine dehydrogenase/pyridine nucleotide transhydrogenase, N-terminal
AASS	9606.ENSP00000403768	InterPro	IPR032095	Saccharopine dehydrogenase-like, C-terminal
AASS	9606.ENSP00000403768	InterPro	IPR036291	NAD(P)-binding domain superfamily
AASS	9606.ENSP00000403768	SMART	SM01002	Alanine dehydrogenase/PNT, C-terminal domain
AASS	9606.ENSP00000403768	SMART	SM01003	Alanine dehydrogenase/PNT, N-terminal domain
ABCB6	9606.ENSP00000265316	GO Process	GO:0000041	Transition metal ion transport
ABCB6	9606.ENSP00000265316	GO Process	GO:0006725	Cellular aromatic compound metabolic process
ABCB6	9606.ENSP00000265316	GO Process	GO:0006778	Porphyrin-containing compound metabolic process
ABCB6	9606.ENSP00000265316	GO Process	GO:0006779	Porphyrin-containing compound biosynthetic process
ABCB6	9606.ENSP00000265316	GO Process	GO:0006807	Nitrogen compound metabolic process
ABCB6	9606.ENSP00000265316	GO Process	GO:0006810	Transport
ABCB6	9606.ENSP00000265316	GO Process	GO:0006811	Ion transport
ABCB6	9606.ENSP00000265316	GO Process	GO:0006812	Cation transport
ABCB6	9606.ENSP00000265316	GO Process	GO:0006826	Iron ion transport
ABCB6	9606.ENSP00000265316	GO Process	GO:0006873	Cellular ion homeostasis
ABCB6	9606.ENSP00000265316	GO Process	GO:0006875	Cellular metal ion homeostasis
ABCB6	9606.ENSP00000265316	GO Process	GO:0006878	Cellular copper ion homeostasis
ABCB6	9606.ENSP00000265316	GO Process	GO:0006879	Cellular iron ion homeostasis
ABCB6	9606.ENSP00000265316	GO Process	GO:0006950	Response to stress
ABCB6	9606.ENSP00000265316	GO Process	GO:0006996	Organelle organization
ABCB6	9606.ENSP00000265316	GO Process	GO:0007275	Multicellular organism development
ABCB6	9606.ENSP00000265316	GO Process	GO:0007399	Nervous system development
ABCB6	9606.ENSP00000265316	GO Process	GO:0007417	Central nervous system development
ABCB6	9606.ENSP00000265316	GO Process	GO:0007420	Brain development
ABCB6	9606.ENSP00000265316	GO Process	GO:0008152	Metabolic process
ABCB6	9606.ENSP00000265316	GO Process	GO:0009058	Biosynthetic process
ABCB6	9606.ENSP00000265316	GO Process	GO:0009636	Response to toxic substance
ABCB6	9606.ENSP00000265316	GO Process	GO:0009987	Cellular process
ABCB6	9606.ENSP00000265316	GO Process	GO:0010035	Response to inorganic substance
ABCB6	9606.ENSP00000265316	GO Process	GO:0010038	Response to metal ion
ABCB6	9606.ENSP00000265316	GO Process	GO:0015886	Heme transport
ABCB6	9606.ENSP00000265316	GO Process	GO:0016043	Cellular component organization
ABCB6	9606.ENSP00000265316	GO Process	GO:0016050	Vesicle organization
ABCB6	9606.ENSP00000265316	GO Process	GO:0018130	Heterocycle biosynthetic process
ABCB6	9606.ENSP00000265316	GO Process	GO:0019438	Aromatic compound biosynthetic process
ABCB6	9606.ENSP00000265316	GO Process	GO:0019725	Cellular homeostasis
ABCB6	9606.ENSP00000265316	GO Process	GO:0022607	Cellular component assembly
ABCB6	9606.ENSP00000265316	GO Process	GO:0030001	Metal ion transport
ABCB6	9606.ENSP00000265316	GO Process	GO:0030003	Cellular cation homeostasis
ABCB6	9606.ENSP00000265316	GO Process	GO:0032438	Melanosome organization
ABCB6	9606.ENSP00000265316	GO Process	GO:0032501	Multicellular organismal process
ABCB6	9606.ENSP00000265316	GO Process	GO:0032502	Developmental process
ABCB6	9606.ENSP00000265316	GO Process	GO:0033013	Tetrapyrrole metabolic process
ABCB6	9606.ENSP00000265316	GO Process	GO:0033014	Tetrapyrrole biosynthetic process
ABCB6	9606.ENSP00000265316	GO Process	GO:0033059	Cellular pigmentation
ABCB6	9606.ENSP00000265316	GO Process	GO:0034220	Ion transmembrane transport
ABCB6	9606.ENSP00000265316	GO Process	GO:0034641	Cellular nitrogen compound metabolic process
ABCB6	9606.ENSP00000265316	GO Process	GO:0034755	Iron ion transmembrane transport
ABCB6	9606.ENSP00000265316	GO Process	GO:0035351	Heme transmembrane transport
ABCB6	9606.ENSP00000265316	GO Process	GO:0042168	Heme metabolic process
ABCB6	9606.ENSP00000265316	GO Process	GO:0042221	Response to chemical
ABCB6	9606.ENSP00000265316	GO Process	GO:0042440	Pigment metabolic process
ABCB6	9606.ENSP00000265316	GO Process	GO:0042592	Homeostatic process
ABCB6	9606.ENSP00000265316	GO Process	GO:0043473	Pigmentation
ABCB6	9606.ENSP00000265316	GO Process	GO:0043588	Skin development
ABCB6	9606.ENSP00000265316	GO Process	GO:0044085	Cellular component biogenesis
ABCB6	9606.ENSP00000265316	GO Process	GO:0044237	Cellular metabolic process
ABCB6	9606.ENSP00000265316	GO Process	GO:0044249	Cellular biosynthetic process
ABCB6	9606.ENSP00000265316	GO Process	GO:0044271	Cellular nitrogen compound biosynthetic process
ABCB6	9606.ENSP00000265316	GO Process	GO:0046483	Heterocycle metabolic process
ABCB6	9606.ENSP00000265316	GO Process	GO:0046686	Response to cadmium ion
ABCB6	9606.ENSP00000265316	GO Process	GO:0046916	Cellular transition metal ion homeostasis
ABCB6	9606.ENSP00000265316	GO Process	GO:0048513	Animal organ development
ABCB6	9606.ENSP00000265316	GO Process	GO:0048731	System development
ABCB6	9606.ENSP00000265316	GO Process	GO:0048753	Pigment granule organization
ABCB6	9606.ENSP00000265316	GO Process	GO:0048856	Anatomical structure development
ABCB6	9606.ENSP00000265316	GO Process	GO:0048878	Chemical homeostasis
ABCB6	9606.ENSP00000265316	GO Process	GO:0050801	Ion homeostasis
ABCB6	9606.ENSP00000265316	GO Process	GO:0050896	Response to stimulus
ABCB6	9606.ENSP00000265316	GO Process	GO:0051179	Localization
ABCB6	9606.ENSP00000265316	GO Process	GO:0051234	Establishment of localization
ABCB6	9606.ENSP00000265316	GO Process	GO:0051716	Cellular response to stimulus
ABCB6	9606.ENSP00000265316	GO Process	GO:0055065	Metal ion homeostasis
ABCB6	9606.ENSP00000265316	GO Process	GO:0055070	Copper ion homeostasis
ABCB6	9606.ENSP00000265316	GO Process	GO:0055072	Iron ion homeostasis
ABCB6	9606.ENSP00000265316	GO Process	GO:0055076	Transition metal ion homeostasis
ABCB6	9606.ENSP00000265316	GO Process	GO:0055080	Cation homeostasis
ABCB6	9606.ENSP00000265316	GO Process	GO:0055082	Cellular chemical homeostasis
ABCB6	9606.ENSP00000265316	GO Process	GO:0055085	Transmembrane transport
ABCB6	9606.ENSP00000265316	GO Process	GO:0060322	Head development
ABCB6	9606.ENSP00000265316	GO Process	GO:0061687	Detoxification of inorganic compound
ABCB6	9606.ENSP00000265316	GO Process	GO:0065007	Biological regulation
ABCB6	9606.ENSP00000265316	GO Process	GO:0065008	Regulation of biological quality
ABCB6	9606.ENSP00000265316	GO Process	GO:0070887	Cellular response to chemical stimulus
ABCB6	9606.ENSP00000265316	GO Process	GO:0070925	Organelle assembly
ABCB6	9606.ENSP00000265316	GO Process	GO:0071241	Cellular response to inorganic substance
ABCB6	9606.ENSP00000265316	GO Process	GO:0071248	Cellular response to metal ion
ABCB6	9606.ENSP00000265316	GO Process	GO:0071276	Cellular response to cadmium ion
ABCB6	9606.ENSP00000265316	GO Process	GO:0071585	Detoxification of cadmium ion
ABCB6	9606.ENSP00000265316	GO Process	GO:0071702	Organic substance transport
ABCB6	9606.ENSP00000265316	GO Process	GO:0071704	Organic substance metabolic process
ABCB6	9606.ENSP00000265316	GO Process	GO:0071705	Nitrogen compound transport
ABCB6	9606.ENSP00000265316	GO Process	GO:0071840	Cellular component organization or biogenesis
ABCB6	9606.ENSP00000265316	GO Process	GO:0097237	Cellular response to toxic substance
ABCB6	9606.ENSP00000265316	GO Process	GO:0097501	Stress response to metal ion
ABCB6	9606.ENSP00000265316	GO Process	GO:0098655	Cation transmembrane transport
ABCB6	9606.ENSP00000265316	GO Process	GO:0098660	Inorganic ion transmembrane transport
ABCB6	9606.ENSP00000265316	GO Process	GO:0098662	Inorganic cation transmembrane transport
ABCB6	9606.ENSP00000265316	GO Process	GO:0098754	Detoxification
ABCB6	9606.ENSP00000265316	GO Process	GO:0098771	Inorganic ion homeostasis
ABCB6	9606.ENSP00000265316	GO Process	GO:0098849	Cellular detoxification of cadmium ion
ABCB6	9606.ENSP00000265316	GO Process	GO:1901360	Organic cyclic compound metabolic process
ABCB6	9606.ENSP00000265316	GO Process	GO:1901362	Organic cyclic compound biosynthetic process
ABCB6	9606.ENSP00000265316	GO Process	GO:1901564	Organonitrogen compound metabolic process
ABCB6	9606.ENSP00000265316	GO Process	GO:1901566	Organonitrogen compound biosynthetic process
ABCB6	9606.ENSP00000265316	GO Process	GO:1901576	Organic substance biosynthetic process
ABCB6	9606.ENSP00000265316	GO Process	GO:1901678	Iron coordination entity transport
ABCB6	9606.ENSP00000265316	GO Process	GO:1903232	Melanosome assembly
ABCB6	9606.ENSP00000265316	GO Process	GO:1990170	Stress response to cadmium ion
ABCB6	9606.ENSP00000265316	GO Process	GO:1990748	Cellular detoxification
ABCB6	9606.ENSP00000265316	GO Function	GO:0000166	Nucleotide binding
ABCB6	9606.ENSP00000265316	GO Function	GO:0003824	Catalytic activity
ABCB6	9606.ENSP00000265316	GO Function	GO:0005215	Transporter activity
ABCB6	9606.ENSP00000265316	GO Function	GO:0005488	Binding
ABCB6	9606.ENSP00000265316	GO Function	GO:0005524	ATP binding
ABCB6	9606.ENSP00000265316	GO Function	GO:0015232	Heme transmembrane transporter activity
ABCB6	9606.ENSP00000265316	GO Function	GO:0015399	Primary active transmembrane transporter activity
ABCB6	9606.ENSP00000265316	GO Function	GO:0015439	ABC-type heme transporter activity
ABCB6	9606.ENSP00000265316	GO Function	GO:0015562	Efflux transmembrane transporter activity
ABCB6	9606.ENSP00000265316	GO Function	GO:0016462	Pyrophosphatase activity
ABCB6	9606.ENSP00000265316	GO Function	GO:0016787	Hydrolase activity
ABCB6	9606.ENSP00000265316	GO Function	GO:0016817	Hydrolase activity, acting on acid anhydrides
ABCB6	9606.ENSP00000265316	GO Function	GO:0016818	Hydrolase activity, acting on acid anhydrides, in phosphorus-containing anhydrides
ABCB6	9606.ENSP00000265316	GO Function	GO:0016887	ATP hydrolysis activity
ABCB6	9606.ENSP00000265316	GO Function	GO:0017076	Purine nucleotide binding
ABCB6	9606.ENSP00000265316	GO Function	GO:0017111	Nucleoside-triphosphatase activity
ABCB6	9606.ENSP00000265316	GO Function	GO:0020037	Heme binding
ABCB6	9606.ENSP00000265316	GO Function	GO:0022804	Active transmembrane transporter activity
ABCB6	9606.ENSP00000265316	GO Function	GO:0022857	Transmembrane transporter activity
ABCB6	9606.ENSP00000265316	GO Function	GO:0030554	Adenyl nucleotide binding
ABCB6	9606.ENSP00000265316	GO Function	GO:0032553	Ribonucleotide binding
ABCB6	9606.ENSP00000265316	GO Function	GO:0032555	Purine ribonucleotide binding
ABCB6	9606.ENSP00000265316	GO Function	GO:0032559	Adenyl ribonucleotide binding
ABCB6	9606.ENSP00000265316	GO Function	GO:0035639	Purine ribonucleoside triphosphate binding
ABCB6	9606.ENSP00000265316	GO Function	GO:0036094	Small molecule binding
ABCB6	9606.ENSP00000265316	GO Function	GO:0042626	ATPase-coupled transmembrane transporter activity
ABCB6	9606.ENSP00000265316	GO Function	GO:0043167	Ion binding
ABCB6	9606.ENSP00000265316	GO Function	GO:0043168	Anion binding
ABCB6	9606.ENSP00000265316	GO Function	GO:0046906	Tetrapyrrole binding
ABCB6	9606.ENSP00000265316	GO Function	GO:0097159	Organic cyclic compound binding
ABCB6	9606.ENSP00000265316	GO Function	GO:0097367	Carbohydrate derivative binding
ABCB6	9606.ENSP00000265316	GO Function	GO:0140359	ABC-type transporter activity
ABCB6	9606.ENSP00000265316	GO Function	GO:0140657	ATP-dependent activity
ABCB6	9606.ENSP00000265316	GO Function	GO:1901265	Nucleoside phosphate binding
ABCB6	9606.ENSP00000265316	GO Function	GO:1901363	Heterocyclic compound binding
ABCB6	9606.ENSP00000265316	GO Component	GO:0000139	Golgi membrane
ABCB6	9606.ENSP00000265316	GO Component	GO:0000323	Lytic vacuole
ABCB6	9606.ENSP00000265316	GO Component	GO:0005576	Extracellular region
ABCB6	9606.ENSP00000265316	GO Component	GO:0005615	Extracellular space
ABCB6	9606.ENSP00000265316	GO Component	GO:0005622	Intracellular anatomical structure
ABCB6	9606.ENSP00000265316	GO Component	GO:0005634	Nucleus
ABCB6	9606.ENSP00000265316	GO Component	GO:0005654	Nucleoplasm
ABCB6	9606.ENSP00000265316	GO Component	GO:0005737	Cytoplasm
ABCB6	9606.ENSP00000265316	GO Component	GO:0005739	Mitochondrion
ABCB6	9606.ENSP00000265316	GO Component	GO:0005740	Mitochondrial envelope
ABCB6	9606.ENSP00000265316	GO Component	GO:0005741	Mitochondrial outer membrane
ABCB6	9606.ENSP00000265316	GO Component	GO:0005764	Lysosome
ABCB6	9606.ENSP00000265316	GO Component	GO:0005765	Lysosomal membrane
ABCB6	9606.ENSP00000265316	GO Component	GO:0005768	Endosome
ABCB6	9606.ENSP00000265316	GO Component	GO:0005769	Early endosome
ABCB6	9606.ENSP00000265316	GO Component	GO:0005770	Late endosome
ABCB6	9606.ENSP00000265316	GO Component	GO:0005771	Multivesicular body
ABCB6	9606.ENSP00000265316	GO Component	GO:0005773	Vacuole
ABCB6	9606.ENSP00000265316	GO Component	GO:0005774	Vacuolar membrane
ABCB6	9606.ENSP00000265316	GO Component	GO:0005783	Endoplasmic reticulum
ABCB6	9606.ENSP00000265316	GO Component	GO:0005789	Endoplasmic reticulum membrane
ABCB6	9606.ENSP00000265316	GO Component	GO:0005794	Golgi apparatus
ABCB6	9606.ENSP00000265316	GO Component	GO:0005829	Cytosol
ABCB6	9606.ENSP00000265316	GO Component	GO:0005886	Plasma membrane
ABCB6	9606.ENSP00000265316	GO Component	GO:0010008	Endosome membrane
ABCB6	9606.ENSP00000265316	GO Component	GO:0012505	Endomembrane system
ABCB6	9606.ENSP00000265316	GO Component	GO:0012506	Vesicle membrane
ABCB6	9606.ENSP00000265316	GO Component	GO:0016020	Membrane
ABCB6	9606.ENSP00000265316	GO Component	GO:0016021	Integral component of membrane
ABCB6	9606.ENSP00000265316	GO Component	GO:0019867	Outer membrane
ABCB6	9606.ENSP00000265316	GO Component	GO:0030659	Cytoplasmic vesicle membrane
ABCB6	9606.ENSP00000265316	GO Component	GO:0031090	Organelle membrane
ABCB6	9606.ENSP00000265316	GO Component	GO:0031224	Intrinsic component of membrane
ABCB6	9606.ENSP00000265316	GO Component	GO:0031300	Intrinsic component of organelle membrane
ABCB6	9606.ENSP00000265316	GO Component	GO:0031301	Integral component of organelle membrane
ABCB6	9606.ENSP00000265316	GO Component	GO:0031306	Intrinsic component of mitochondrial outer membrane
ABCB6	9606.ENSP00000265316	GO Component	GO:0031307	Integral component of mitochondrial outer membrane
ABCB6	9606.ENSP00000265316	GO Component	GO:0031410	Cytoplasmic vesicle
ABCB6	9606.ENSP00000265316	GO Component	GO:0031901	Early endosome membrane
ABCB6	9606.ENSP00000265316	GO Component	GO:0031902	Late endosome membrane
ABCB6	9606.ENSP00000265316	GO Component	GO:0031966	Mitochondrial membrane
ABCB6	9606.ENSP00000265316	GO Component	GO:0031967	Organelle envelope
ABCB6	9606.ENSP00000265316	GO Component	GO:0031968	Organelle outer membrane
ABCB6	9606.ENSP00000265316	GO Component	GO:0031974	Membrane-enclosed lumen
ABCB6	9606.ENSP00000265316	GO Component	GO:0031975	Envelope
ABCB6	9606.ENSP00000265316	GO Component	GO:0031981	Nuclear lumen
ABCB6	9606.ENSP00000265316	GO Component	GO:0031982	Vesicle
ABCB6	9606.ENSP00000265316	GO Component	GO:0031984	Organelle subcompartment
ABCB6	9606.ENSP00000265316	GO Component	GO:0032585	Multivesicular body membrane
ABCB6	9606.ENSP00000265316	GO Component	GO:0032592	Integral component of mitochondrial membrane
ABCB6	9606.ENSP00000265316	GO Component	GO:0032991	Protein-containing complex
ABCB6	9606.ENSP00000265316	GO Component	GO:0033162	Melanosome membrane
ABCB6	9606.ENSP00000265316	GO Component	GO:0036019	Endolysosome
ABCB6	9606.ENSP00000265316	GO Component	GO:0036020	Endolysosome membrane
ABCB6	9606.ENSP00000265316	GO Component	GO:0042175	Nuclear outer membrane-endoplasmic reticulum membrane network
ABCB6	9606.ENSP00000265316	GO Component	GO:0042470	Melanosome
ABCB6	9606.ENSP00000265316	GO Component	GO:0043190	ATP-binding cassette (ABC) transporter complex
ABCB6	9606.ENSP00000265316	GO Component	GO:0043226	Organelle
ABCB6	9606.ENSP00000265316	GO Component	GO:0043227	Membrane-bounded organelle
ABCB6	9606.ENSP00000265316	GO Component	GO:0043229	Intracellular organelle
ABCB6	9606.ENSP00000265316	GO Component	GO:0043230	Extracellular organelle
ABCB6	9606.ENSP00000265316	GO Component	GO:0043231	Intracellular membrane-bounded organelle
ABCB6	9606.ENSP00000265316	GO Component	GO:0043233	Organelle lumen
ABCB6	9606.ENSP00000265316	GO Component	GO:0045009	Chitosome
ABCB6	9606.ENSP00000265316	GO Component	GO:0048770	Pigment granule
ABCB6	9606.ENSP00000265316	GO Component	GO:0065010	Extracellular membrane-bounded organelle
ABCB6	9606.ENSP00000265316	GO Component	GO:0070013	Intracellular organelle lumen
ABCB6	9606.ENSP00000265316	GO Component	GO:0070062	Extracellular exosome
ABCB6	9606.ENSP00000265316	GO Component	GO:0071944	Cell periphery
ABCB6	9606.ENSP00000265316	GO Component	GO:0090741	Pigment granule membrane
ABCB6	9606.ENSP00000265316	GO Component	GO:0097708	Intracellular vesicle
ABCB6	9606.ENSP00000265316	GO Component	GO:0098533	ATPase dependent transmembrane transport complex
ABCB6	9606.ENSP00000265316	GO Component	GO:0098573	Intrinsic component of mitochondrial membrane
ABCB6	9606.ENSP00000265316	GO Component	GO:0098588	Bounding membrane of organelle
ABCB6	9606.ENSP00000265316	GO Component	GO:0098796	Membrane protein complex
ABCB6	9606.ENSP00000265316	GO Component	GO:0098797	Plasma membrane protein complex
ABCB6	9606.ENSP00000265316	GO Component	GO:0098827	Endoplasmic reticulum subcompartment
ABCB6	9606.ENSP00000265316	GO Component	GO:0098852	Lytic vacuole membrane
ABCB6	9606.ENSP00000265316	GO Component	GO:0110165	Cellular anatomical entity
ABCB6	9606.ENSP00000265316	GO Component	GO:1902495	Transmembrane transporter complex
ABCB6	9606.ENSP00000265316	GO Component	GO:1903561	Extracellular vesicle
ABCB6	9606.ENSP00000265316	GO Component	GO:1990351	Transporter complex
ABCB6	9606.ENSP00000265316	STRING clusters	CL:12760	Ion transport by P-type ATPases, and ATPase dependent transmembrane transport complex
ABCB6	9606.ENSP00000265316	STRING clusters	CL:12816	ATPase dependent transmembrane transport complex, and Ion-transport regulator, FXYD motif
ABCB6	9606.ENSP00000265316	STRING clusters	CL:12818	ATPase dependent transmembrane transport complex
ABCB6	9606.ENSP00000265316	KEGG	hsa02010	ABC transporters
ABCB6	9606.ENSP00000265316	Reactome	HSA-1369007	Mitochondrial ABC transporters
ABCB6	9606.ENSP00000265316	Reactome	HSA-1643685	Disease
ABCB6	9606.ENSP00000265316	Reactome	HSA-382551	Transport of small molecules
ABCB6	9606.ENSP00000265316	Reactome	HSA-382556	ABC-family proteins mediated transport
ABCB6	9606.ENSP00000265316	Reactome	HSA-5619084	ABC transporter disorders
ABCB6	9606.ENSP00000265316	Reactome	HSA-5619115	Disorders of transmembrane transporters
ABCB6	9606.ENSP00000265316	Reactome	HSA-5683371	Defective ABCB6 causes MCOPCB7
ABCB6	9606.ENSP00000265316	DISEASES	DOID:0050155	Sensory system disease
ABCB6	9606.ENSP00000265316	DISEASES	DOID:0060304	Dyschromatosis universalis hereditaria
ABCB6	9606.ENSP00000265316	DISEASES	DOID:10123	Pigmentation disease
ABCB6	9606.ENSP00000265316	DISEASES	DOID:10629	Microphthalmia
ABCB6	9606.ENSP00000265316	DISEASES	DOID:12270	Coloboma
ABCB6	9606.ENSP00000265316	DISEASES	DOID:16	Integumentary system disease
ABCB6	9606.ENSP00000265316	DISEASES	DOID:2729	Dyskeratosis congenita
ABCB6	9606.ENSP00000265316	DISEASES	DOID:37	Skin disease
ABCB6	9606.ENSP00000265316	DISEASES	DOID:4	Disease
ABCB6	9606.ENSP00000265316	DISEASES	DOID:5614	Eye disease
ABCB6	9606.ENSP00000265316	DISEASES	DOID:7	Disease of anatomical entity
ABCB6	9606.ENSP00000265316	DISEASES	DOID:863	Nervous system disease
ABCB6	9606.ENSP00000265316	TISSUES	BTO:0000000	Tissues, cell types and enzyme sources
ABCB6	9606.ENSP00000265316	TISSUES	BTO:0000042	Animal
ABCB6	9606.ENSP00000265316	TISSUES	BTO:0000174	Embryonic structure
ABCB6	9606.ENSP00000265316	TISSUES	BTO:0000176	Carcinoma cell
ABCB6	9606.ENSP00000265316	TISSUES	BTO:0000284	Organism form
ABCB6	9606.ENSP00000265316	TISSUES	BTO:0000314	Neuroepithelium
ABCB6	9606.ENSP00000265316	TISSUES	BTO:0000315	Ectoderm
ABCB6	9606.ENSP00000265316	TISSUES	BTO:0000379	Embryo
ABCB6	9606.ENSP00000265316	TISSUES	BTO:0000415	Epithelioma cell
ABCB6	9606.ENSP00000265316	TISSUES	BTO:0000416	Epithelium
ABCB6	9606.ENSP00000265316	TISSUES	BTO:0000556	Germ layer
ABCB6	9606.ENSP00000265316	TISSUES	BTO:0000594	Liver cancer cell
ABCB6	9606.ENSP00000265316	TISSUES	BTO:0000604	Adenocarcinoma cell
ABCB6	9606.ENSP00000265316	TISSUES	BTO:0000608	Hepatoma cell
ABCB6	9606.ENSP00000265316	TISSUES	BTO:0000634	Integument
ABCB6	9606.ENSP00000265316	TISSUES	BTO:0001489	Whole body
ABCB6	9606.ENSP00000265316	COMPARTMENTS	GOCC:0000323	Lytic vacuole
ABCB6	9606.ENSP00000265316	COMPARTMENTS	GOCC:0005576	Extracellular region
ABCB6	9606.ENSP00000265316	COMPARTMENTS	GOCC:0005615	Extracellular space
ABCB6	9606.ENSP00000265316	COMPARTMENTS	GOCC:0005622	Intracellular
ABCB6	9606.ENSP00000265316	COMPARTMENTS	GOCC:0005634	Nucleus
ABCB6	9606.ENSP00000265316	COMPARTMENTS	GOCC:0005737	Cytoplasm
ABCB6	9606.ENSP00000265316	COMPARTMENTS	GOCC:0005739	Mitochondrion
ABCB6	9606.ENSP00000265316	COMPARTMENTS	GOCC:0005740	Mitochondrial envelope
ABCB6	9606.ENSP00000265316	COMPARTMENTS	GOCC:0005741	Mitochondrial outer membrane
ABCB6	9606.ENSP00000265316	COMPARTMENTS	GOCC:0005764	Lysosome
ABCB6	9606.ENSP00000265316	COMPARTMENTS	GOCC:0005765	Lysosomal membrane
ABCB6	9606.ENSP00000265316	COMPARTMENTS	GOCC:0005768	Endosome
ABCB6	9606.ENSP00000265316	COMPARTMENTS	GOCC:0005769	Early endosome
ABCB6	9606.ENSP00000265316	COMPARTMENTS	GOCC:0005770	Late endosome
ABCB6	9606.ENSP00000265316	COMPARTMENTS	GOCC:0005771	Multivesicular body
ABCB6	9606.ENSP00000265316	COMPARTMENTS	GOCC:0005773	Vacuole
ABCB6	9606.ENSP00000265316	COMPARTMENTS	GOCC:0005774	Vacuolar membrane
ABCB6	9606.ENSP00000265316	COMPARTMENTS	GOCC:0005783	Endoplasmic reticulum
ABCB6	9606.ENSP00000265316	COMPARTMENTS	GOCC:0005789	Endoplasmic reticulum membrane
ABCB6	9606.ENSP00000265316	COMPARTMENTS	GOCC:0005794	Golgi apparatus
ABCB6	9606.ENSP00000265316	COMPARTMENTS	GOCC:0005886	Plasma membrane
ABCB6	9606.ENSP00000265316	COMPARTMENTS	GOCC:0010008	Endosome membrane
ABCB6	9606.ENSP00000265316	COMPARTMENTS	GOCC:0012505	Endomembrane system
ABCB6	9606.ENSP00000265316	COMPARTMENTS	GOCC:0012506	Vesicle membrane
ABCB6	9606.ENSP00000265316	COMPARTMENTS	GOCC:0016020	Membrane
ABCB6	9606.ENSP00000265316	COMPARTMENTS	GOCC:0016021	Integral component of membrane
ABCB6	9606.ENSP00000265316	COMPARTMENTS	GOCC:0019867	Outer membrane
ABCB6	9606.ENSP00000265316	COMPARTMENTS	GOCC:0030659	Cytoplasmic vesicle membrane
ABCB6	9606.ENSP00000265316	COMPARTMENTS	GOCC:0031090	Organelle membrane
ABCB6	9606.ENSP00000265316	COMPARTMENTS	GOCC:0031224	Intrinsic component of membrane
ABCB6	9606.ENSP00000265316	COMPARTMENTS	GOCC:0031300	Intrinsic component of organelle membrane
ABCB6	9606.ENSP00000265316	COMPARTMENTS	GOCC:0031301	Integral component of organelle membrane
ABCB6	9606.ENSP00000265316	COMPARTMENTS	GOCC:0031306	Intrinsic component of mitochondrial outer membrane
ABCB6	9606.ENSP00000265316	COMPARTMENTS	GOCC:0031307	Integral component of mitochondrial outer membrane
ABCB6	9606.ENSP00000265316	COMPARTMENTS	GOCC:0031332	RNAi effector complex
ABCB6	9606.ENSP00000265316	COMPARTMENTS	GOCC:0031410	Cytoplasmic vesicle
ABCB6	9606.ENSP00000265316	COMPARTMENTS	GOCC:0031901	Early endosome membrane
ABCB6	9606.ENSP00000265316	COMPARTMENTS	GOCC:0031902	Late endosome membrane
ABCB6	9606.ENSP00000265316	COMPARTMENTS	GOCC:0031966	Mitochondrial membrane
ABCB6	9606.ENSP00000265316	COMPARTMENTS	GOCC:0031967	Organelle envelope
ABCB6	9606.ENSP00000265316	COMPARTMENTS	GOCC:0031968	Organelle outer membrane
ABCB6	9606.ENSP00000265316	COMPARTMENTS	GOCC:0031975	Envelope
ABCB6	9606.ENSP00000265316	COMPARTMENTS	GOCC:0031982	Vesicle
ABCB6	9606.ENSP00000265316	COMPARTMENTS	GOCC:0031984	Organelle subcompartment
ABCB6	9606.ENSP00000265316	COMPARTMENTS	GOCC:0032585	Multivesicular body membrane
ABCB6	9606.ENSP00000265316	COMPARTMENTS	GOCC:0032592	Integral component of mitochondrial membrane
ABCB6	9606.ENSP00000265316	COMPARTMENTS	GOCC:0032991	Protein-containing complex
ABCB6	9606.ENSP00000265316	COMPARTMENTS	GOCC:0033162	Melanosome membrane
ABCB6	9606.ENSP00000265316	COMPARTMENTS	GOCC:0033167	ARC complex
ABCB6	9606.ENSP00000265316	COMPARTMENTS	GOCC:0036019	Endolysosome
ABCB6	9606.ENSP00000265316	COMPARTMENTS	GOCC:0036020	Endolysosome membrane
ABCB6	9606.ENSP00000265316	COMPARTMENTS	GOCC:0042175	Nuclear outer membrane-endoplasmic reticulum membrane network
ABCB6	9606.ENSP00000265316	COMPARTMENTS	GOCC:0042470	Melanosome
ABCB6	9606.ENSP00000265316	COMPARTMENTS	GOCC:0043190	ATP-binding cassette (ABC) transporter complex
ABCB6	9606.ENSP00000265316	COMPARTMENTS	GOCC:0043226	Organelle
ABCB6	9606.ENSP00000265316	COMPARTMENTS	GOCC:0043227	Membrane-bounded organelle
ABCB6	9606.ENSP00000265316	COMPARTMENTS	GOCC:0043229	Intracellular organelle
ABCB6	9606.ENSP00000265316	COMPARTMENTS	GOCC:0043230	Extracellular organelle
ABCB6	9606.ENSP00000265316	COMPARTMENTS	GOCC:0043231	Intracellular membrane-bounded organelle
ABCB6	9606.ENSP00000265316	COMPARTMENTS	GOCC:0045009	Chitosome
ABCB6	9606.ENSP00000265316	COMPARTMENTS	GOCC:0048770	Pigment granule
ABCB6	9606.ENSP00000265316	COMPARTMENTS	GOCC:0065010	Extracellular membrane-bounded organelle
ABCB6	9606.ENSP00000265316	COMPARTMENTS	GOCC:0070062	Extracellular exosome
ABCB6	9606.ENSP00000265316	COMPARTMENTS	GOCC:0071944	Cell periphery
ABCB6	9606.ENSP00000265316	COMPARTMENTS	GOCC:0090741	Pigment granule membrane
ABCB6	9606.ENSP00000265316	COMPARTMENTS	GOCC:0097708	Intracellular vesicle
ABCB6	9606.ENSP00000265316	COMPARTMENTS	GOCC:0098533	ATPase dependent transmembrane transport complex
ABCB6	9606.ENSP00000265316	COMPARTMENTS	GOCC:0098573	Intrinsic component of mitochondrial membrane
ABCB6	9606.ENSP00000265316	COMPARTMENTS	GOCC:0098588	Bounding membrane of organelle
ABCB6	9606.ENSP00000265316	COMPARTMENTS	GOCC:0098796	Membrane protein complex
ABCB6	9606.ENSP00000265316	COMPARTMENTS	GOCC:0098797	Plasma membrane protein complex
ABCB6	9606.ENSP00000265316	COMPARTMENTS	GOCC:0098827	Endoplasmic reticulum subcompartment
ABCB6	9606.ENSP00000265316	COMPARTMENTS	GOCC:0098852	Lytic vacuole membrane
ABCB6	9606.ENSP00000265316	COMPARTMENTS	GOCC:0110165	Cellular anatomical entity
ABCB6	9606.ENSP00000265316	COMPARTMENTS	GOCC:1902495	Transmembrane transporter complex
ABCB6	9606.ENSP00000265316	COMPARTMENTS	GOCC:1903561	Extracellular vesicle
ABCB6	9606.ENSP00000265316	COMPARTMENTS	GOCC:1990351	Transporter complex
ABCB6	9606.ENSP00000265316	COMPARTMENTS	GOCC:1990904	Ribonucleoprotein complex
ABCB6	9606.ENSP00000265316	Monarch	EFO:0004503	Hematological measurement
ABCB6	9606.ENSP00000265316	Monarch	EFO:0004555	Glycoprotein measurement
ABCB6	9606.ENSP00000265316	Monarch	EFO:0004696	Sex hormone-binding globulin measurement
ABCB6	9606.ENSP00000265316	Monarch	EFO:0004730	Hormone measurement
ABCB6	9606.ENSP00000265316	Monarch	EFO:0004747	Protein measurement
ABCB6	9606.ENSP00000265316	Monarch	EFO:0005192	Red blood cell distribution width
ABCB6	9606.ENSP00000265316	Monarch	EFO:0007986	Reticulocyte count
ABCB6	9606.ENSP00000265316	Monarch	EFO:0010700	Reticulocyte measurement
ABCB6	9606.ENSP00000265316	Monarch	EFO:0011008	Sex hormone measurement
ABCB6	9606.ENSP00000265316	Monarch	HP:0000002	Abnormality of body height
ABCB6	9606.ENSP00000265316	Monarch	HP:0000118	Phenotypic abnormality
ABCB6	9606.ENSP00000265316	Monarch	HP:0000364	Hearing abnormality
ABCB6	9606.ENSP00000265316	Monarch	HP:0000365	Hearing impairment
ABCB6	9606.ENSP00000265316	Monarch	HP:0000478	Abnormality of the eye
ABCB6	9606.ENSP00000265316	Monarch	HP:0000479	Abnormal retinal morphology
ABCB6	9606.ENSP00000265316	Monarch	HP:0000480	Retinal coloboma
ABCB6	9606.ENSP00000265316	Monarch	HP:0000568	Microphthalmia
ABCB6	9606.ENSP00000265316	Monarch	HP:0000589	Coloboma
ABCB6	9606.ENSP00000265316	Monarch	HP:0000598	Abnormality of the ear
ABCB6	9606.ENSP00000265316	Monarch	HP:0000707	Abnormality of the nervous system
ABCB6	9606.ENSP00000265316	Monarch	HP:0000822	Hypertension
ABCB6	9606.ENSP00000265316	Monarch	HP:0000951	Abnormality of the skin
ABCB6	9606.ENSP00000265316	Monarch	HP:0000953	Hyperpigmentation of the skin
ABCB6	9606.ENSP00000265316	Monarch	HP:0000957	Cafe-au-lait spot
ABCB6	9606.ENSP00000265316	Monarch	HP:0000992	Cutaneous photosensitivity
ABCB6	9606.ENSP00000265316	Monarch	HP:0001000	Abnormality of skin pigmentation
ABCB6	9606.ENSP00000265316	Monarch	HP:0001010	Hypopigmentation of the skin
ABCB6	9606.ENSP00000265316	Monarch	HP:0001034	Hypermelanotic macule
ABCB6	9606.ENSP00000265316	Monarch	HP:0001053	Hypopigmented skin patches
ABCB6	9606.ENSP00000265316	Monarch	HP:0001098	Abnormal fundus morphology
ABCB6	9606.ENSP00000265316	Monarch	HP:0001103	Abnormal macular morphology
ABCB6	9606.ENSP00000265316	Monarch	HP:0001116	Macular coloboma
ABCB6	9606.ENSP00000265316	Monarch	HP:0001324	Muscle weakness
ABCB6	9606.ENSP00000265316	Monarch	HP:0001337	Tremor
ABCB6	9606.ENSP00000265316	Monarch	HP:0001480	Freckling
ABCB6	9606.ENSP00000265316	Monarch	HP:0001507	Growth abnormality
ABCB6	9606.ENSP00000265316	Monarch	HP:0001510	Growth delay
ABCB6	9606.ENSP00000265316	Monarch	HP:0001574	Abnormality of the integument
ABCB6	9606.ENSP00000265316	Monarch	HP:0001626	Abnormality of the cardiovascular system
ABCB6	9606.ENSP00000265316	Monarch	HP:0001871	Abnormality of blood and blood-forming tissues
ABCB6	9606.ENSP00000265316	Monarch	HP:0001877	Abnormal erythrocyte morphology
ABCB6	9606.ENSP00000265316	Monarch	HP:0001878	Hemolytic anemia
ABCB6	9606.ENSP00000265316	Monarch	HP:0001903	Anemia
ABCB6	9606.ENSP00000265316	Monarch	HP:0001923	Reticulocytosis
ABCB6	9606.ENSP00000265316	Monarch	HP:0001939	Abnormality of metabolism/homeostasis
ABCB6	9606.ENSP00000265316	Monarch	HP:0002153	Hyperkalemia
ABCB6	9606.ENSP00000265316	Monarch	HP:0002378	Hand tremor
ABCB6	9606.ENSP00000265316	Monarch	HP:0003011	Abnormality of the musculature
ABCB6	9606.ENSP00000265316	Monarch	HP:0003111	Abnormal blood ion concentration
ABCB6	9606.ENSP00000265316	Monarch	HP:0003324	Generalized muscle weakness
ABCB6	9606.ENSP00000265316	Monarch	HP:0003394	Muscle spasm
ABCB6	9606.ENSP00000265316	Monarch	HP:0003470	Paralysis
ABCB6	9606.ENSP00000265316	Monarch	HP:0003768	Periodic paralysis
ABCB6	9606.ENSP00000265316	Monarch	HP:0004305	Involuntary movements
ABCB6	9606.ENSP00000265316	Monarch	HP:0004312	Abnormal reticulocyte morphology
ABCB6	9606.ENSP00000265316	Monarch	HP:0004322	Short stature
ABCB6	9606.ENSP00000265316	Monarch	HP:0004329	Abnormal posterior eye segment morphology
ABCB6	9606.ENSP00000265316	Monarch	HP:0004446	Stomatocytosis
ABCB6	9606.ENSP00000265316	Monarch	HP:0004447	Poikilocytosis
ABCB6	9606.ENSP00000265316	Monarch	HP:0004802	Episodic hemolytic anemia
ABCB6	9606.ENSP00000265316	Monarch	HP:0005518	Increased mean corpuscular volume
ABCB6	9606.ENSP00000265316	Monarch	HP:0005590	Spotty hypopigmentation
ABCB6	9606.ENSP00000265316	Monarch	HP:0007400	Irregular hyperpigmentation
ABCB6	9606.ENSP00000265316	Monarch	HP:0007565	Multiple cafe-au-lait spots
ABCB6	9606.ENSP00000265316	Monarch	HP:0008056	Aplasia/Hypoplasia affecting the eye
ABCB6	9606.ENSP00000265316	Monarch	HP:0010929	Abnormal blood cation concentration
ABCB6	9606.ENSP00000265316	Monarch	HP:0010930	Abnormal blood monovalent inorganic cation concentration
ABCB6	9606.ENSP00000265316	Monarch	HP:0011025	Abnormal cardiovascular system physiology
ABCB6	9606.ENSP00000265316	Monarch	HP:0011042	Abnormal blood potassium concentration
ABCB6	9606.ENSP00000265316	Monarch	HP:0011121	Abnormality of skin morphology
ABCB6	9606.ENSP00000265316	Monarch	HP:0011354	Generalized abnormality of skin
ABCB6	9606.ENSP00000265316	Monarch	HP:0011355	Localized skin lesion
ABCB6	9606.ENSP00000265316	Monarch	HP:0011442	Abnormal central motor function
ABCB6	9606.ENSP00000265316	Monarch	HP:0011804	Abnormal muscle physiology
ABCB6	9606.ENSP00000265316	Monarch	HP:0011895	Anemia due to reduced life span of red cells
ABCB6	9606.ENSP00000265316	Monarch	HP:0012372	Abnormal eye morphology
ABCB6	9606.ENSP00000265316	Monarch	HP:0012638	Abnormal nervous system physiology
ABCB6	9606.ENSP00000265316	Monarch	HP:0012733	Macule
ABCB6	9606.ENSP00000265316	Monarch	HP:0020073	Hypopigmented macule
ABCB6	9606.ENSP00000265316	Monarch	HP:0025065	Abnormal mean corpuscular volume
ABCB6	9606.ENSP00000265316	Monarch	HP:0030188	Tremor by anatomical site
ABCB6	9606.ENSP00000265316	Monarch	HP:0030972	Abnormal systemic blood pressure
ABCB6	9606.ENSP00000265316	Monarch	HP:0031704	Abnormal ear physiology
ABCB6	9606.ENSP00000265316	Monarch	HP:0032180	Abnormal circulating metabolite concentration
ABCB6	9606.ENSP00000265316	Monarch	HP:0032263	Increased blood pressure
ABCB6	9606.ENSP00000265316	Monarch	HP:0033127	Abnormality of the musculoskeletal system
ABCB6	9606.ENSP00000265316	Monarch	HP:0100022	Abnormality of movement
ABCB6	9606.ENSP00000265316	Monarch	HP:0100887	Abnormality of globe size
ABCB6	9606.ENSP00000265316	UniProt Keywords	KW-0025	Alternative splicing
ABCB6	9606.ENSP00000265316	UniProt Keywords	KW-0067	ATP-binding
ABCB6	9606.ENSP00000265316	UniProt Keywords	KW-0256	Endoplasmic reticulum
ABCB6	9606.ENSP00000265316	UniProt Keywords	KW-0333	Golgi apparatus
ABCB6	9606.ENSP00000265316	UniProt Keywords	KW-0472	Membrane
ABCB6	9606.ENSP00000265316	UniProt Keywords	KW-0496	Mitochondrion
ABCB6	9606.ENSP00000265316	UniProt Keywords	KW-0547	Nucleotide-binding
ABCB6	9606.ENSP00000265316	UniProt Keywords	KW-0812	Transmembrane
ABCB6	9606.ENSP00000265316	UniProt Keywords	KW-0813	Transport
ABCB6	9606.ENSP00000265316	UniProt Keywords	KW-0967	Endosome
ABCB6	9606.ENSP00000265316	UniProt Keywords	KW-1000	Mitochondrion outer membrane
ABCB6	9606.ENSP00000265316	UniProt Keywords	KW-1003	Cell membrane
ABCB6	9606.ENSP00000265316	UniProt Keywords	KW-1011	Dyskeratosis congenita
ABCB6	9606.ENSP00000265316	UniProt Keywords	KW-1013	Microphthalmia
ABCB6	9606.ENSP00000265316	UniProt Keywords	KW-1133	Transmembrane helix
ABCB6	9606.ENSP00000265316	Pfam	PF00664	ABC transporter transmembrane region
ABCB6	9606.ENSP00000265316	Pfam	PF16185	Mitochondrial ABC-transporter N-terminal five TM region
ABCB6	9606.ENSP00000265316	InterPro	IPR003439	ABC transporter-like, ATP-binding domain
ABCB6	9606.ENSP00000265316	InterPro	IPR003593	AAA+ ATPase domain
ABCB6	9606.ENSP00000265316	InterPro	IPR011527	ABC transporter type 1, transmembrane domain
ABCB6	9606.ENSP00000265316	InterPro	IPR017871	ABC transporter-like, conserved site
ABCB6	9606.ENSP00000265316	InterPro	IPR027417	P-loop containing nucleoside triphosphate hydrolase
ABCB6	9606.ENSP00000265316	InterPro	IPR032410	Mitochondrial ABC-transporter, N-terminal five TM domain
ABCB6	9606.ENSP00000265316	InterPro	IPR036640	ABC transporter type 1, transmembrane domain superfamily
ABCB6	9606.ENSP00000265316	InterPro	IPR039421	Type 1 protein exporter
ABCB6	9606.ENSP00000265316	SMART	SM00382	ATPases associated with a variety of cellular activities
ABCB7	9606.ENSP00000253577	GO Process	GO:0000041	Transition metal ion transport
ABCB7	9606.ENSP00000253577	GO Process	GO:0006790	Sulfur compound metabolic process
ABCB7	9606.ENSP00000253577	GO Process	GO:0006810	Transport
ABCB7	9606.ENSP00000253577	GO Process	GO:0006811	Ion transport
ABCB7	9606.ENSP00000253577	GO Process	GO:0006812	Cation transport
ABCB7	9606.ENSP00000253577	GO Process	GO:0006826	Iron ion transport
ABCB7	9606.ENSP00000253577	GO Process	GO:0006873	Cellular ion homeostasis
ABCB7	9606.ENSP00000253577	GO Process	GO:0006875	Cellular metal ion homeostasis
ABCB7	9606.ENSP00000253577	GO Process	GO:0006879	Cellular iron ion homeostasis
ABCB7	9606.ENSP00000253577	GO Process	GO:0008152	Metabolic process
ABCB7	9606.ENSP00000253577	GO Process	GO:0009889	Regulation of biosynthetic process
ABCB7	9606.ENSP00000253577	GO Process	GO:0009890	Negative regulation of biosynthetic process
ABCB7	9606.ENSP00000253577	GO Process	GO:0009891	Positive regulation of biosynthetic process
ABCB7	9606.ENSP00000253577	GO Process	GO:0009892	Negative regulation of metabolic process
ABCB7	9606.ENSP00000253577	GO Process	GO:0009893	Positive regulation of metabolic process
ABCB7	9606.ENSP00000253577	GO Process	GO:0009987	Cellular process
ABCB7	9606.ENSP00000253577	GO Process	GO:0015886	Heme transport
ABCB7	9606.ENSP00000253577	GO Process	GO:0016043	Cellular component organization
ABCB7	9606.ENSP00000253577	GO Process	GO:0016226	Iron-sulfur cluster assembly
ABCB7	9606.ENSP00000253577	GO Process	GO:0019222	Regulation of metabolic process
ABCB7	9606.ENSP00000253577	GO Process	GO:0019725	Cellular homeostasis
ABCB7	9606.ENSP00000253577	GO Process	GO:0022607	Cellular component assembly
ABCB7	9606.ENSP00000253577	GO Process	GO:0030001	Metal ion transport
ABCB7	9606.ENSP00000253577	GO Process	GO:0030003	Cellular cation homeostasis
ABCB7	9606.ENSP00000253577	GO Process	GO:0031163	Metallo-sulfur cluster assembly
ABCB7	9606.ENSP00000253577	GO Process	GO:0031323	Regulation of cellular metabolic process
ABCB7	9606.ENSP00000253577	GO Process	GO:0031324	Negative regulation of cellular metabolic process
ABCB7	9606.ENSP00000253577	GO Process	GO:0031325	Positive regulation of cellular metabolic process
ABCB7	9606.ENSP00000253577	GO Process	GO:0031326	Regulation of cellular biosynthetic process
ABCB7	9606.ENSP00000253577	GO Process	GO:0031328	Positive regulation of cellular biosynthetic process
ABCB7	9606.ENSP00000253577	GO Process	GO:0034220	Ion transmembrane transport
ABCB7	9606.ENSP00000253577	GO Process	GO:0034755	Iron ion transmembrane transport
ABCB7	9606.ENSP00000253577	GO Process	GO:0042592	Homeostatic process
ABCB7	9606.ENSP00000253577	GO Process	GO:0042762	Regulation of sulfur metabolic process
ABCB7	9606.ENSP00000253577	GO Process	GO:0044085	Cellular component biogenesis
ABCB7	9606.ENSP00000253577	GO Process	GO:0044087	Regulation of cellular component biogenesis
ABCB7	9606.ENSP00000253577	GO Process	GO:0044237	Cellular metabolic process
ABCB7	9606.ENSP00000253577	GO Process	GO:0046916	Cellular transition metal ion homeostasis
ABCB7	9606.ENSP00000253577	GO Process	GO:0048518	Positive regulation of biological process
ABCB7	9606.ENSP00000253577	GO Process	GO:0048519	Negative regulation of biological process
ABCB7	9606.ENSP00000253577	GO Process	GO:0048522	Positive regulation of cellular process
ABCB7	9606.ENSP00000253577	GO Process	GO:0048523	Negative regulation of cellular process
ABCB7	9606.ENSP00000253577	GO Process	GO:0048878	Chemical homeostasis
ABCB7	9606.ENSP00000253577	GO Process	GO:0050789	Regulation of biological process
ABCB7	9606.ENSP00000253577	GO Process	GO:0050794	Regulation of cellular process
ABCB7	9606.ENSP00000253577	GO Process	GO:0050801	Ion homeostasis
ABCB7	9606.ENSP00000253577	GO Process	GO:0051128	Regulation of cellular component organization
ABCB7	9606.ENSP00000253577	GO Process	GO:0051130	Positive regulation of cellular component organization
ABCB7	9606.ENSP00000253577	GO Process	GO:0051171	Regulation of nitrogen compound metabolic process
ABCB7	9606.ENSP00000253577	GO Process	GO:0051173	Positive regulation of nitrogen compound metabolic process
ABCB7	9606.ENSP00000253577	GO Process	GO:0051176	Positive regulation of sulfur metabolic process
ABCB7	9606.ENSP00000253577	GO Process	GO:0051179	Localization
ABCB7	9606.ENSP00000253577	GO Process	GO:0051234	Establishment of localization
ABCB7	9606.ENSP00000253577	GO Process	GO:0055065	Metal ion homeostasis
ABCB7	9606.ENSP00000253577	GO Process	GO:0055072	Iron ion homeostasis
ABCB7	9606.ENSP00000253577	GO Process	GO:0055076	Transition metal ion homeostasis
ABCB7	9606.ENSP00000253577	GO Process	GO:0055080	Cation homeostasis
ABCB7	9606.ENSP00000253577	GO Process	GO:0055082	Cellular chemical homeostasis
ABCB7	9606.ENSP00000253577	GO Process	GO:0055085	Transmembrane transport
ABCB7	9606.ENSP00000253577	GO Process	GO:0065007	Biological regulation
ABCB7	9606.ENSP00000253577	GO Process	GO:0065008	Regulation of biological quality
ABCB7	9606.ENSP00000253577	GO Process	GO:0070453	Regulation of heme biosynthetic process
ABCB7	9606.ENSP00000253577	GO Process	GO:0070455	Positive regulation of heme biosynthetic process
ABCB7	9606.ENSP00000253577	GO Process	GO:0071702	Organic substance transport
ABCB7	9606.ENSP00000253577	GO Process	GO:0071705	Nitrogen compound transport
ABCB7	9606.ENSP00000253577	GO Process	GO:0071840	Cellular component organization or biogenesis
ABCB7	9606.ENSP00000253577	GO Process	GO:0098655	Cation transmembrane transport
ABCB7	9606.ENSP00000253577	GO Process	GO:0098660	Inorganic ion transmembrane transport
ABCB7	9606.ENSP00000253577	GO Process	GO:0098662	Inorganic cation transmembrane transport
ABCB7	9606.ENSP00000253577	GO Process	GO:0098771	Inorganic ion homeostasis
ABCB7	9606.ENSP00000253577	GO Process	GO:0140466	Iron-sulfur cluster export from the mitochondrion
ABCB7	9606.ENSP00000253577	GO Process	GO:1901401	Regulation of tetrapyrrole metabolic process
ABCB7	9606.ENSP00000253577	GO Process	GO:1901403	Positive regulation of tetrapyrrole metabolic process
ABCB7	9606.ENSP00000253577	GO Process	GO:1901463	Regulation of tetrapyrrole biosynthetic process
ABCB7	9606.ENSP00000253577	GO Process	GO:1901465	Positive regulation of tetrapyrrole biosynthetic process
ABCB7	9606.ENSP00000253577	GO Process	GO:1901678	Iron coordination entity transport
ABCB7	9606.ENSP00000253577	GO Process	GO:1902497	Iron-sulfur cluster transmembrane transport
ABCB7	9606.ENSP00000253577	GO Process	GO:1903329	Regulation of iron-sulfur cluster assembly
ABCB7	9606.ENSP00000253577	GO Process	GO:1903331	Positive regulation of iron-sulfur cluster assembly
ABCB7	9606.ENSP00000253577	GO Process	GO:1903426	Regulation of reactive oxygen species biosynthetic process
ABCB7	9606.ENSP00000253577	GO Process	GO:1903427	Negative regulation of reactive oxygen species biosynthetic process
ABCB7	9606.ENSP00000253577	GO Process	GO:1990542	Mitochondrial transmembrane transport
ABCB7	9606.ENSP00000253577	GO Process	GO:2000377	Regulation of reactive oxygen species metabolic process
ABCB7	9606.ENSP00000253577	GO Process	GO:2000378	Negative regulation of reactive oxygen species metabolic process
ABCB7	9606.ENSP00000253577	GO Function	GO:0000166	Nucleotide binding
ABCB7	9606.ENSP00000253577	GO Function	GO:0005215	Transporter activity
ABCB7	9606.ENSP00000253577	GO Function	GO:0005488	Binding
ABCB7	9606.ENSP00000253577	GO Function	GO:0005515	Protein binding
ABCB7	9606.ENSP00000253577	GO Function	GO:0005524	ATP binding
ABCB7	9606.ENSP00000253577	GO Function	GO:0015232	Heme transmembrane transporter activity
ABCB7	9606.ENSP00000253577	GO Function	GO:0015399	Primary active transmembrane transporter activity
ABCB7	9606.ENSP00000253577	GO Function	GO:0017076	Purine nucleotide binding
ABCB7	9606.ENSP00000253577	GO Function	GO:0022804	Active transmembrane transporter activity
ABCB7	9606.ENSP00000253577	GO Function	GO:0022857	Transmembrane transporter activity
ABCB7	9606.ENSP00000253577	GO Function	GO:0030554	Adenyl nucleotide binding
ABCB7	9606.ENSP00000253577	GO Function	GO:0032553	Ribonucleotide binding
ABCB7	9606.ENSP00000253577	GO Function	GO:0032555	Purine ribonucleotide binding
ABCB7	9606.ENSP00000253577	GO Function	GO:0032559	Adenyl ribonucleotide binding
ABCB7	9606.ENSP00000253577	GO Function	GO:0035639	Purine ribonucleoside triphosphate binding
ABCB7	9606.ENSP00000253577	GO Function	GO:0036094	Small molecule binding
ABCB7	9606.ENSP00000253577	GO Function	GO:0042626	ATPase-coupled transmembrane transporter activity
ABCB7	9606.ENSP00000253577	GO Function	GO:0042802	Identical protein binding
ABCB7	9606.ENSP00000253577	GO Function	GO:0042803	Protein homodimerization activity
ABCB7	9606.ENSP00000253577	GO Function	GO:0043167	Ion binding
ABCB7	9606.ENSP00000253577	GO Function	GO:0043168	Anion binding
ABCB7	9606.ENSP00000253577	GO Function	GO:0046983	Protein dimerization activity
ABCB7	9606.ENSP00000253577	GO Function	GO:0097159	Organic cyclic compound binding
ABCB7	9606.ENSP00000253577	GO Function	GO:0097367	Carbohydrate derivative binding
ABCB7	9606.ENSP00000253577	GO Function	GO:0140359	ABC-type transporter activity
ABCB7	9606.ENSP00000253577	GO Function	GO:0140481	ABC-type iron-sulfur cluster transporter activity
ABCB7	9606.ENSP00000253577	GO Function	GO:0140657	ATP-dependent activity
ABCB7	9606.ENSP00000253577	GO Function	GO:1901265	Nucleoside phosphate binding
ABCB7	9606.ENSP00000253577	GO Function	GO:1901363	Heterocyclic compound binding
ABCB7	9606.ENSP00000253577	GO Component	GO:0005622	Intracellular anatomical structure
ABCB7	9606.ENSP00000253577	GO Component	GO:0005737	Cytoplasm
ABCB7	9606.ENSP00000253577	GO Component	GO:0005739	Mitochondrion
ABCB7	9606.ENSP00000253577	GO Component	GO:0005740	Mitochondrial envelope
ABCB7	9606.ENSP00000253577	GO Component	GO:0005743	Mitochondrial inner membrane
ABCB7	9606.ENSP00000253577	GO Component	GO:0016020	Membrane
ABCB7	9606.ENSP00000253577	GO Component	GO:0016021	Integral component of membrane
ABCB7	9606.ENSP00000253577	GO Component	GO:0019866	Organelle inner membrane
ABCB7	9606.ENSP00000253577	GO Component	GO:0031090	Organelle membrane
ABCB7	9606.ENSP00000253577	GO Component	GO:0031224	Intrinsic component of membrane
ABCB7	9606.ENSP00000253577	GO Component	GO:0031966	Mitochondrial membrane
ABCB7	9606.ENSP00000253577	GO Component	GO:0031967	Organelle envelope
ABCB7	9606.ENSP00000253577	GO Component	GO:0031975	Envelope
ABCB7	9606.ENSP00000253577	GO Component	GO:0043226	Organelle
ABCB7	9606.ENSP00000253577	GO Component	GO:0043227	Membrane-bounded organelle
ABCB7	9606.ENSP00000253577	GO Component	GO:0043229	Intracellular organelle
ABCB7	9606.ENSP00000253577	GO Component	GO:0043231	Intracellular membrane-bounded organelle
ABCB7	9606.ENSP00000253577	GO Component	GO:0110165	Cellular anatomical entity
ABCB7	9606.ENSP00000253577	STRING clusters	CL:11717	Iron-sulfur cluster assembly, and Iron ion transport
ABCB7	9606.ENSP00000253577	STRING clusters	CL:11797	Iron-sulfur cluster assembly, and Essential protein Yae1, N-terminal
ABCB7	9606.ENSP00000253577	STRING clusters	CL:11799	Iron-sulfur cluster assembly
ABCB7	9606.ENSP00000253577	STRING clusters	CL:11835	Cytosolic iron-sulfur cluster assembly
ABCB7	9606.ENSP00000253577	STRING clusters	CL:11845	Cytosolic iron-sulfur cluster assembly
ABCB7	9606.ENSP00000253577	KEGG	hsa02010	ABC transporters
ABCB7	9606.ENSP00000253577	Reactome	HSA-1369007	Mitochondrial ABC transporters
ABCB7	9606.ENSP00000253577	Reactome	HSA-1430728	Metabolism
ABCB7	9606.ENSP00000253577	Reactome	HSA-2564830	Cytosolic iron-sulfur cluster assembly
ABCB7	9606.ENSP00000253577	Reactome	HSA-382551	Transport of small molecules
ABCB7	9606.ENSP00000253577	Reactome	HSA-382556	ABC-family proteins mediated transport
ABCB7	9606.ENSP00000253577	DISEASES	DOID:0050177	Monogenic disease
ABCB7	9606.ENSP00000253577	DISEASES	DOID:0050554	X-linked sideroblastic anemia with ataxia
ABCB7	9606.ENSP00000253577	DISEASES	DOID:0050686	Organ system cancer
ABCB7	9606.ENSP00000253577	DISEASES	DOID:0050687	Cell type cancer
ABCB7	9606.ENSP00000253577	DISEASES	DOID:0050735	X-linked monogenic disease
ABCB7	9606.ENSP00000253577	DISEASES	DOID:0050736	Autosomal dominant disease
ABCB7	9606.ENSP00000253577	DISEASES	DOID:0050739	Autosomal genetic disease
ABCB7	9606.ENSP00000253577	DISEASES	DOID:0060063	Sideroblastic anemia 1
ABCB7	9606.ENSP00000253577	DISEASES	DOID:0060100	Musculoskeletal system cancer
ABCB7	9606.ENSP00000253577	DISEASES	DOID:0060388	Chromosomal deletion syndrome
ABCB7	9606.ENSP00000253577	DISEASES	DOID:0060429	Chromosomal duplication syndrome
ABCB7	9606.ENSP00000253577	DISEASES	DOID:0060436	Chromosome 22q11.2 microduplication syndrome
ABCB7	9606.ENSP00000253577	DISEASES	DOID:0080012	X-linked recessive disease
ABCB7	9606.ENSP00000253577	DISEASES	DOID:0080014	Chromosomal disease
ABCB7	9606.ENSP00000253577	DISEASES	DOID:0080354	Phelan-McDermid syndrome
ABCB7	9606.ENSP00000253577	DISEASES	DOID:0080697	Opitz GBBB syndrome type I
ABCB7	9606.ENSP00000253577	DISEASES	DOID:1115	Sarcoma
ABCB7	9606.ENSP00000253577	DISEASES	DOID:11198	DiGeorge syndrome
ABCB7	9606.ENSP00000253577	DISEASES	DOID:1240	Leukemia
ABCB7	9606.ENSP00000253577	DISEASES	DOID:12449	Aplastic anemia
ABCB7	9606.ENSP00000253577	DISEASES	DOID:14566	Disease of cellular proliferation
ABCB7	9606.ENSP00000253577	DISEASES	DOID:150	Disease of mental health
ABCB7	9606.ENSP00000253577	DISEASES	DOID:1561	Cognitive disorder
ABCB7	9606.ENSP00000253577	DISEASES	DOID:162	Cancer
ABCB7	9606.ENSP00000253577	DISEASES	DOID:17	Musculoskeletal system disease
ABCB7	9606.ENSP00000253577	DISEASES	DOID:201	Connective tissue cancer
ABCB7	9606.ENSP00000253577	DISEASES	DOID:225	Syndrome
ABCB7	9606.ENSP00000253577	DISEASES	DOID:2355	Anemia
ABCB7	9606.ENSP00000253577	DISEASES	DOID:2468	Psychotic disorder
ABCB7	9606.ENSP00000253577	DISEASES	DOID:2531	Hematologic cancer
ABCB7	9606.ENSP00000253577	DISEASES	DOID:3355	Fibrosarcoma
ABCB7	9606.ENSP00000253577	DISEASES	DOID:3369	Ewing sarcoma
ABCB7	9606.ENSP00000253577	DISEASES	DOID:3507	Dermatofibrosarcoma protuberans
ABCB7	9606.ENSP00000253577	DISEASES	DOID:4	Disease
ABCB7	9606.ENSP00000253577	DISEASES	DOID:5419	Schizophrenia
ABCB7	9606.ENSP00000253577	DISEASES	DOID:630	Genetic disease
ABCB7	9606.ENSP00000253577	DISEASES	DOID:65	Connective tissue disease
ABCB7	9606.ENSP00000253577	DISEASES	DOID:7	Disease of anatomical entity
ABCB7	9606.ENSP00000253577	DISEASES	DOID:74	Hematopoietic system disease
ABCB7	9606.ENSP00000253577	DISEASES	DOID:8552	Chronic myeloid leukemia
ABCB7	9606.ENSP00000253577	DISEASES	DOID:8692	Myeloid leukemia
ABCB7	9606.ENSP00000253577	DISEASES	DOID:8955	Sideroblastic anemia
ABCB7	9606.ENSP00000253577	TISSUES	BTO:0000000	Tissues, cell types and enzyme sources
ABCB7	9606.ENSP00000253577	TISSUES	BTO:0000042	Animal
ABCB7	9606.ENSP00000253577	TISSUES	BTO:0000081	Reproductive system
ABCB7	9606.ENSP00000253577	TISSUES	BTO:0000083	Female reproductive system
ABCB7	9606.ENSP00000253577	TISSUES	BTO:0000887	Muscle
ABCB7	9606.ENSP00000253577	TISSUES	BTO:0001485	Muscular system
ABCB7	9606.ENSP00000253577	TISSUES	BTO:0001489	Whole body
ABCB7	9606.ENSP00000253577	TISSUES	BTO:0003091	Urogenital system
ABCB7	9606.ENSP00000253577	COMPARTMENTS	GOCC:0005622	Intracellular
ABCB7	9606.ENSP00000253577	COMPARTMENTS	GOCC:0005737	Cytoplasm
ABCB7	9606.ENSP00000253577	COMPARTMENTS	GOCC:0005739	Mitochondrion
ABCB7	9606.ENSP00000253577	COMPARTMENTS	GOCC:0005740	Mitochondrial envelope
ABCB7	9606.ENSP00000253577	COMPARTMENTS	GOCC:0005743	Mitochondrial inner membrane
ABCB7	9606.ENSP00000253577	COMPARTMENTS	GOCC:0016020	Membrane
ABCB7	9606.ENSP00000253577	COMPARTMENTS	GOCC:0019866	Organelle inner membrane
ABCB7	9606.ENSP00000253577	COMPARTMENTS	GOCC:0031090	Organelle membrane
ABCB7	9606.ENSP00000253577	COMPARTMENTS	GOCC:0031966	Mitochondrial membrane
ABCB7	9606.ENSP00000253577	COMPARTMENTS	GOCC:0031967	Organelle envelope
ABCB7	9606.ENSP00000253577	COMPARTMENTS	GOCC:0031975	Envelope
ABCB7	9606.ENSP00000253577	COMPARTMENTS	GOCC:0043226	Organelle
ABCB7	9606.ENSP00000253577	COMPARTMENTS	GOCC:0043227	Membrane-bounded organelle
ABCB7	9606.ENSP00000253577	COMPARTMENTS	GOCC:0043229	Intracellular organelle
ABCB7	9606.ENSP00000253577	COMPARTMENTS	GOCC:0043231	Intracellular membrane-bounded organelle
ABCB7	9606.ENSP00000253577	COMPARTMENTS	GOCC:0110165	Cellular anatomical entity
ABCB7	9606.ENSP00000253577	Monarch	EFO:0004272	Anemia (phenotype)
ABCB7	9606.ENSP00000253577	Monarch	HP:0000118	Phenotypic abnormality
ABCB7	9606.ENSP00000253577	Monarch	HP:0000478	Abnormality of the eye
ABCB7	9606.ENSP00000253577	Monarch	HP:0000486	Strabismus
ABCB7	9606.ENSP00000253577	Monarch	HP:0000496	Abnormality of eye movement
ABCB7	9606.ENSP00000253577	Monarch	HP:0000549	Abnormal conjugate eye movement
ABCB7	9606.ENSP00000253577	Monarch	HP:0000639	Nystagmus
ABCB7	9606.ENSP00000253577	Monarch	HP:0000707	Abnormality of the nervous system
ABCB7	9606.ENSP00000253577	Monarch	HP:0000924	Abnormality of the skeletal system
ABCB7	9606.ENSP00000253577	Monarch	HP:0000925	Abnormality of the vertebral column
ABCB7	9606.ENSP00000253577	Monarch	HP:0001251	Ataxia
ABCB7	9606.ENSP00000253577	Monarch	HP:0001252	Hypotonia
ABCB7	9606.ENSP00000253577	Monarch	HP:0001260	Dysarthria
ABCB7	9606.ENSP00000253577	Monarch	HP:0001263	Global developmental delay
ABCB7	9606.ENSP00000253577	Monarch	HP:0001310	Dysmetria
ABCB7	9606.ENSP00000253577	Monarch	HP:0001337	Tremor
ABCB7	9606.ENSP00000253577	Monarch	HP:0001347	Hyperreflexia
ABCB7	9606.ENSP00000253577	Monarch	HP:0001507	Growth abnormality
ABCB7	9606.ENSP00000253577	Monarch	HP:0001510	Growth delay
ABCB7	9606.ENSP00000253577	Monarch	HP:0001511	Intrauterine growth retardation
ABCB7	9606.ENSP00000253577	Monarch	HP:0001871	Abnormality of blood and blood-forming tissues
ABCB7	9606.ENSP00000253577	Monarch	HP:0001877	Abnormal erythrocyte morphology
ABCB7	9606.ENSP00000253577	Monarch	HP:0001903	Anemia
ABCB7	9606.ENSP00000253577	Monarch	HP:0001924	Sideroblastic anemia
ABCB7	9606.ENSP00000253577	Monarch	HP:0001931	Hypochromic anemia
ABCB7	9606.ENSP00000253577	Monarch	HP:0001935	Microcytic anemia
ABCB7	9606.ENSP00000253577	Monarch	HP:0001939	Abnormality of metabolism/homeostasis
ABCB7	9606.ENSP00000253577	Monarch	HP:0002011	Morphological central nervous system abnormality
ABCB7	9606.ENSP00000253577	Monarch	HP:0002075	Dysdiadochokinesis
ABCB7	9606.ENSP00000253577	Monarch	HP:0002080	Intention tremor
ABCB7	9606.ENSP00000253577	Monarch	HP:0002167	Neurological speech impairment
ABCB7	9606.ENSP00000253577	Monarch	HP:0002169	Clonus
ABCB7	9606.ENSP00000253577	Monarch	HP:0002345	Action tremor
ABCB7	9606.ENSP00000253577	Monarch	HP:0002470	Nonprogressive cerebellar ataxia
ABCB7	9606.ENSP00000253577	Monarch	HP:0002493	Upper motor neuron dysfunction
ABCB7	9606.ENSP00000253577	Monarch	HP:0002650	Scoliosis
ABCB7	9606.ENSP00000253577	Monarch	HP:0003011	Abnormality of the musculature
ABCB7	9606.ENSP00000253577	Monarch	HP:0003487	Babinski sign
ABCB7	9606.ENSP00000253577	Monarch	HP:0003808	Abnormal muscle tone
ABCB7	9606.ENSP00000253577	Monarch	HP:0004305	Involuntary movements
ABCB7	9606.ENSP00000253577	Monarch	HP:0004840	Hypochromic microcytic anemia
ABCB7	9606.ENSP00000253577	Monarch	HP:0007256	Abnormal pyramidal sign
ABCB7	9606.ENSP00000253577	Monarch	HP:0009121	Abnormal axial skeleton morphology
ABCB7	9606.ENSP00000253577	Monarch	HP:0010674	Abnormality of the curvature of the vertebral column
ABCB7	9606.ENSP00000253577	Monarch	HP:0010972	Anemia of inadequate production
ABCB7	9606.ENSP00000253577	Monarch	HP:0011442	Abnormal central motor function
ABCB7	9606.ENSP00000253577	Monarch	HP:0011443	Abnormality of coordination
ABCB7	9606.ENSP00000253577	Monarch	HP:0011446	Abnormality of higher mental function
ABCB7	9606.ENSP00000253577	Monarch	HP:0011804	Abnormal muscle physiology
ABCB7	9606.ENSP00000253577	Monarch	HP:0011842	Abnormal skeletal morphology
ABCB7	9606.ENSP00000253577	Monarch	HP:0012373	Abnormal eye physiology
ABCB7	9606.ENSP00000253577	Monarch	HP:0012443	Abnormality of brain morphology
ABCB7	9606.ENSP00000253577	Monarch	HP:0012547	Abnormal involuntary eye movements
ABCB7	9606.ENSP00000253577	Monarch	HP:0012638	Abnormal nervous system physiology
ABCB7	9606.ENSP00000253577	Monarch	HP:0012758	Neurodevelopmental delay
ABCB7	9606.ENSP00000253577	Monarch	HP:0012759	Neurodevelopmental abnormality
ABCB7	9606.ENSP00000253577	Monarch	HP:0030186	Kinetic tremor
ABCB7	9606.ENSP00000253577	Monarch	HP:0031826	Abnormal reflex
ABCB7	9606.ENSP00000253577	Monarch	HP:0031828	Abnormal superficial reflex
ABCB7	9606.ENSP00000253577	Monarch	HP:0033127	Abnormality of the musculoskeletal system
ABCB7	9606.ENSP00000253577	Monarch	HP:0100022	Abnormality of movement
ABCB7	9606.ENSP00000253577	UniProt Keywords	KW-0007	Acetylation
ABCB7	9606.ENSP00000253577	UniProt Keywords	KW-0025	Alternative splicing
ABCB7	9606.ENSP00000253577	UniProt Keywords	KW-0067	ATP-binding
ABCB7	9606.ENSP00000253577	UniProt Keywords	KW-0472	Membrane
ABCB7	9606.ENSP00000253577	UniProt Keywords	KW-0496	Mitochondrion
ABCB7	9606.ENSP00000253577	UniProt Keywords	KW-0547	Nucleotide-binding
ABCB7	9606.ENSP00000253577	UniProt Keywords	KW-0597	Phosphoprotein
ABCB7	9606.ENSP00000253577	UniProt Keywords	KW-0809	Transit peptide
ABCB7	9606.ENSP00000253577	UniProt Keywords	KW-0812	Transmembrane
ABCB7	9606.ENSP00000253577	UniProt Keywords	KW-0813	Transport
ABCB7	9606.ENSP00000253577	UniProt Keywords	KW-0999	Mitochondrion inner membrane
ABCB7	9606.ENSP00000253577	UniProt Keywords	KW-1133	Transmembrane helix
ABCB7	9606.ENSP00000253577	Pfam	PF00664	ABC transporter transmembrane region
ABCB7	9606.ENSP00000253577	InterPro	IPR003439	ABC transporter-like, ATP-binding domain
ABCB7	9606.ENSP00000253577	InterPro	IPR003593	AAA+ ATPase domain
ABCB7	9606.ENSP00000253577	InterPro	IPR011527	ABC transporter type 1, transmembrane domain
ABCB7	9606.ENSP00000253577	InterPro	IPR017871	ABC transporter-like, conserved site
ABCB7	9606.ENSP00000253577	InterPro	IPR027417	P-loop containing nucleoside triphosphate hydrolase
ABCB7	9606.ENSP00000253577	InterPro	IPR036640	ABC transporter type 1, transmembrane domain superfamily
ABCB7	9606.ENSP00000253577	InterPro	IPR039421	Type 1 protein exporter
ABCB7	9606.ENSP00000253577	SMART	SM00382	ATPases associated with a variety of cellular activities
ABCC1	9606.ENSP00000382342	GO Process	GO:0003008	System process
ABCC1	9606.ENSP00000382342	GO Process	GO:0003013	Circulatory system process
ABCC1	9606.ENSP00000382342	GO Process	GO:0003018	Vascular process in circulatory system
ABCC1	9606.ENSP00000382342	GO Process	GO:0006082	Organic acid metabolic process
ABCC1	9606.ENSP00000382342	GO Process	GO:0006690	Icosanoid metabolic process
ABCC1	9606.ENSP00000382342	GO Process	GO:0006691	Leukotriene metabolic process
ABCC1	9606.ENSP00000382342	GO Process	GO:0006725	Cellular aromatic compound metabolic process
ABCC1	9606.ENSP00000382342	GO Process	GO:0006766	Vitamin metabolic process
ABCC1	9606.ENSP00000382342	GO Process	GO:0006767	Water-soluble vitamin metabolic process
ABCC1	9606.ENSP00000382342	GO Process	GO:0006778	Porphyrin-containing compound metabolic process
ABCC1	9606.ENSP00000382342	GO Process	GO:0006787	Porphyrin-containing compound catabolic process
ABCC1	9606.ENSP00000382342	GO Process	GO:0006805	Xenobiotic metabolic process
ABCC1	9606.ENSP00000382342	GO Process	GO:0006807	Nitrogen compound metabolic process
ABCC1	9606.ENSP00000382342	GO Process	GO:0006810	Transport
ABCC1	9606.ENSP00000382342	GO Process	GO:0006811	Ion transport
ABCC1	9606.ENSP00000382342	GO Process	GO:0006820	Anion transport
ABCC1	9606.ENSP00000382342	GO Process	GO:0006857	Oligopeptide transport
ABCC1	9606.ENSP00000382342	GO Process	GO:0006869	Lipid transport
ABCC1	9606.ENSP00000382342	GO Process	GO:0006935	Chemotaxis
ABCC1	9606.ENSP00000382342	GO Process	GO:0006950	Response to stress
ABCC1	9606.ENSP00000382342	GO Process	GO:0006979	Response to oxidative stress
ABCC1	9606.ENSP00000382342	GO Process	GO:0008152	Metabolic process
ABCC1	9606.ENSP00000382342	GO Process	GO:0009056	Catabolic process
ABCC1	9606.ENSP00000382342	GO Process	GO:0009235	Cobalamin metabolic process
ABCC1	9606.ENSP00000382342	GO Process	GO:0009410	Response to xenobiotic stimulus
ABCC1	9606.ENSP00000382342	GO Process	GO:0009605	Response to external stimulus
ABCC1	9606.ENSP00000382342	GO Process	GO:0009719	Response to endogenous stimulus
ABCC1	9606.ENSP00000382342	GO Process	GO:0009987	Cellular process
ABCC1	9606.ENSP00000382342	GO Process	GO:0010033	Response to organic substance
ABCC1	9606.ENSP00000382342	GO Process	GO:0010232	Vascular transport
ABCC1	9606.ENSP00000382342	GO Process	GO:0010243	Response to organonitrogen compound
ABCC1	9606.ENSP00000382342	GO Process	GO:0010876	Lipid localization
ABCC1	9606.ENSP00000382342	GO Process	GO:0015698	Inorganic anion transport
ABCC1	9606.ENSP00000382342	GO Process	GO:0015711	Organic anion transport
ABCC1	9606.ENSP00000382342	GO Process	GO:0015748	Organophosphate ester transport
ABCC1	9606.ENSP00000382342	GO Process	GO:0015833	Peptide transport
ABCC1	9606.ENSP00000382342	GO Process	GO:0015849	Organic acid transport
ABCC1	9606.ENSP00000382342	GO Process	GO:0015889	Cobalamin transport
ABCC1	9606.ENSP00000382342	GO Process	GO:0015914	Phospholipid transport
ABCC1	9606.ENSP00000382342	GO Process	GO:0016043	Cellular component organization
ABCC1	9606.ENSP00000382342	GO Process	GO:0016477	Cell migration
ABCC1	9606.ENSP00000382342	GO Process	GO:0019439	Aromatic compound catabolic process
ABCC1	9606.ENSP00000382342	GO Process	GO:0019752	Carboxylic acid metabolic process
ABCC1	9606.ENSP00000382342	GO Process	GO:0031347	Regulation of defense response
ABCC1	9606.ENSP00000382342	GO Process	GO:0031349	Positive regulation of defense response
ABCC1	9606.ENSP00000382342	GO Process	GO:0032101	Regulation of response to external stimulus
ABCC1	9606.ENSP00000382342	GO Process	GO:0032103	Positive regulation of response to external stimulus
ABCC1	9606.ENSP00000382342	GO Process	GO:0032501	Multicellular organismal process
ABCC1	9606.ENSP00000382342	GO Process	GO:0033013	Tetrapyrrole metabolic process
ABCC1	9606.ENSP00000382342	GO Process	GO:0033015	Tetrapyrrole catabolic process
ABCC1	9606.ENSP00000382342	GO Process	GO:0033036	Macromolecule localization
ABCC1	9606.ENSP00000382342	GO Process	GO:0033554	Cellular response to stress
ABCC1	9606.ENSP00000382342	GO Process	GO:0034204	Lipid translocation
ABCC1	9606.ENSP00000382342	GO Process	GO:0034220	Ion transmembrane transport
ABCC1	9606.ENSP00000382342	GO Process	GO:0034599	Cellular response to oxidative stress
ABCC1	9606.ENSP00000382342	GO Process	GO:0034635	Glutathione transport
ABCC1	9606.ENSP00000382342	GO Process	GO:0034641	Cellular nitrogen compound metabolic process
ABCC1	9606.ENSP00000382342	GO Process	GO:0034775	Glutathione transmembrane transport
ABCC1	9606.ENSP00000382342	GO Process	GO:0035443	Tripeptide transmembrane transport
ABCC1	9606.ENSP00000382342	GO Process	GO:0035461	Vitamin transmembrane transport
ABCC1	9606.ENSP00000382342	GO Process	GO:0035672	Oligopeptide transmembrane transport
ABCC1	9606.ENSP00000382342	GO Process	GO:0040011	Locomotion
ABCC1	9606.ENSP00000382342	GO Process	GO:0042167	Heme catabolic process
ABCC1	9606.ENSP00000382342	GO Process	GO:0042168	Heme metabolic process
ABCC1	9606.ENSP00000382342	GO Process	GO:0042221	Response to chemical
ABCC1	9606.ENSP00000382342	GO Process	GO:0042330	Taxis
ABCC1	9606.ENSP00000382342	GO Process	GO:0042440	Pigment metabolic process
ABCC1	9606.ENSP00000382342	GO Process	GO:0042886	Amide transport
ABCC1	9606.ENSP00000382342	GO Process	GO:0042908	Xenobiotic transport
ABCC1	9606.ENSP00000382342	GO Process	GO:0042939	Tripeptide transport
ABCC1	9606.ENSP00000382342	GO Process	GO:0043436	Oxoacid metabolic process
ABCC1	9606.ENSP00000382342	GO Process	GO:0044237	Cellular metabolic process
ABCC1	9606.ENSP00000382342	GO Process	GO:0044248	Cellular catabolic process
ABCC1	9606.ENSP00000382342	GO Process	GO:0044270	Cellular nitrogen compound catabolic process
ABCC1	9606.ENSP00000382342	GO Process	GO:0044281	Small molecule metabolic process
ABCC1	9606.ENSP00000382342	GO Process	GO:0045332	Phospholipid translocation
ABCC1	9606.ENSP00000382342	GO Process	GO:0046149	Pigment catabolic process
ABCC1	9606.ENSP00000382342	GO Process	GO:0046483	Heterocycle metabolic process
ABCC1	9606.ENSP00000382342	GO Process	GO:0046700	Heterocycle catabolic process
ABCC1	9606.ENSP00000382342	GO Process	GO:0046942	Carboxylic acid transport
ABCC1	9606.ENSP00000382342	GO Process	GO:0048518	Positive regulation of biological process
ABCC1	9606.ENSP00000382342	GO Process	GO:0048583	Regulation of response to stimulus
ABCC1	9606.ENSP00000382342	GO Process	GO:0048584	Positive regulation of response to stimulus
ABCC1	9606.ENSP00000382342	GO Process	GO:0048870	Cell motility
ABCC1	9606.ENSP00000382342	GO Process	GO:0050727	Regulation of inflammatory response
ABCC1	9606.ENSP00000382342	GO Process	GO:0050729	Positive regulation of inflammatory response
ABCC1	9606.ENSP00000382342	GO Process	GO:0050789	Regulation of biological process
ABCC1	9606.ENSP00000382342	GO Process	GO:0050896	Response to stimulus
ABCC1	9606.ENSP00000382342	GO Process	GO:0051179	Localization
ABCC1	9606.ENSP00000382342	GO Process	GO:0051180	Vitamin transport
ABCC1	9606.ENSP00000382342	GO Process	GO:0051234	Establishment of localization
ABCC1	9606.ENSP00000382342	GO Process	GO:0051716	Cellular response to stimulus
ABCC1	9606.ENSP00000382342	GO Process	GO:0055085	Transmembrane transport
ABCC1	9606.ENSP00000382342	GO Process	GO:0060326	Cell chemotaxis
ABCC1	9606.ENSP00000382342	GO Process	GO:0061024	Membrane organization
ABCC1	9606.ENSP00000382342	GO Process	GO:0062197	Cellular response to chemical stress
ABCC1	9606.ENSP00000382342	GO Process	GO:0065007	Biological regulation
ABCC1	9606.ENSP00000382342	GO Process	GO:0065008	Regulation of biological quality
ABCC1	9606.ENSP00000382342	GO Process	GO:0070633	Transepithelial transport
ABCC1	9606.ENSP00000382342	GO Process	GO:0070887	Cellular response to chemical stimulus
ABCC1	9606.ENSP00000382342	GO Process	GO:0071310	Cellular response to organic substance
ABCC1	9606.ENSP00000382342	GO Process	GO:0071417	Cellular response to organonitrogen compound
ABCC1	9606.ENSP00000382342	GO Process	GO:0071466	Cellular response to xenobiotic stimulus
ABCC1	9606.ENSP00000382342	GO Process	GO:0071495	Cellular response to endogenous stimulus
ABCC1	9606.ENSP00000382342	GO Process	GO:0071702	Organic substance transport
ABCC1	9606.ENSP00000382342	GO Process	GO:0071704	Organic substance metabolic process
ABCC1	9606.ENSP00000382342	GO Process	GO:0071705	Nitrogen compound transport
ABCC1	9606.ENSP00000382342	GO Process	GO:0071715	Icosanoid transport
ABCC1	9606.ENSP00000382342	GO Process	GO:0071716	Leukotriene transport
ABCC1	9606.ENSP00000382342	GO Process	GO:0071840	Cellular component organization or biogenesis
ABCC1	9606.ENSP00000382342	GO Process	GO:0072337	Modified amino acid transport
ABCC1	9606.ENSP00000382342	GO Process	GO:0072348	Sulfur compound transport
ABCC1	9606.ENSP00000382342	GO Process	GO:0080134	Regulation of response to stress
ABCC1	9606.ENSP00000382342	GO Process	GO:0097035	Regulation of membrane lipid distribution
ABCC1	9606.ENSP00000382342	GO Process	GO:0098656	Anion transmembrane transport
ABCC1	9606.ENSP00000382342	GO Process	GO:0099039	Sphingolipid translocation
ABCC1	9606.ENSP00000382342	GO Process	GO:0140115	Export across plasma membrane
ABCC1	9606.ENSP00000382342	GO Process	GO:0140352	Export from cell
ABCC1	9606.ENSP00000382342	GO Process	GO:0150104	Transport across blood-brain barrier
ABCC1	9606.ENSP00000382342	GO Process	GO:1901360	Organic cyclic compound metabolic process
ABCC1	9606.ENSP00000382342	GO Process	GO:1901361	Organic cyclic compound catabolic process
ABCC1	9606.ENSP00000382342	GO Process	GO:1901564	Organonitrogen compound metabolic process
ABCC1	9606.ENSP00000382342	GO Process	GO:1901565	Organonitrogen compound catabolic process
ABCC1	9606.ENSP00000382342	GO Process	GO:1901575	Organic substance catabolic process
ABCC1	9606.ENSP00000382342	GO Process	GO:1901652	Response to peptide
ABCC1	9606.ENSP00000382342	GO Process	GO:1901653	Cellular response to peptide
ABCC1	9606.ENSP00000382342	GO Process	GO:1901698	Response to nitrogen compound
ABCC1	9606.ENSP00000382342	GO Process	GO:1901699	Cellular response to nitrogen compound
ABCC1	9606.ENSP00000382342	GO Process	GO:1901700	Response to oxygen-containing compound
ABCC1	9606.ENSP00000382342	GO Process	GO:1901701	Cellular response to oxygen-containing compound
ABCC1	9606.ENSP00000382342	GO Process	GO:1903825	Organic acid transmembrane transport
ABCC1	9606.ENSP00000382342	GO Process	GO:1904645	Response to amyloid-beta
ABCC1	9606.ENSP00000382342	GO Process	GO:1904646	Cellular response to amyloid-beta
ABCC1	9606.ENSP00000382342	GO Process	GO:1905039	Carboxylic acid transmembrane transport
ABCC1	9606.ENSP00000382342	GO Process	GO:1990962	Xenobiotic transport across blood-brain barrier
ABCC1	9606.ENSP00000382342	GO Function	GO:0000166	Nucleotide binding
ABCC1	9606.ENSP00000382342	GO Function	GO:0003824	Catalytic activity
ABCC1	9606.ENSP00000382342	GO Function	GO:0005215	Transporter activity
ABCC1	9606.ENSP00000382342	GO Function	GO:0005319	Lipid transporter activity
ABCC1	9606.ENSP00000382342	GO Function	GO:0005342	Organic acid transmembrane transporter activity
ABCC1	9606.ENSP00000382342	GO Function	GO:0005488	Binding
ABCC1	9606.ENSP00000382342	GO Function	GO:0005524	ATP binding
ABCC1	9606.ENSP00000382342	GO Function	GO:0008509	Anion transmembrane transporter activity
ABCC1	9606.ENSP00000382342	GO Function	GO:0008514	Organic anion transmembrane transporter activity
ABCC1	9606.ENSP00000382342	GO Function	GO:0008559	ABC-type xenobiotic transporter activity
ABCC1	9606.ENSP00000382342	GO Function	GO:0015075	Ion transmembrane transporter activity
ABCC1	9606.ENSP00000382342	GO Function	GO:0015103	Inorganic anion transmembrane transporter activity
ABCC1	9606.ENSP00000382342	GO Function	GO:0015318	Inorganic molecular entity transmembrane transporter activity
ABCC1	9606.ENSP00000382342	GO Function	GO:0015399	Primary active transmembrane transporter activity
ABCC1	9606.ENSP00000382342	GO Function	GO:0015420	ABC-type vitamin B12 transporter activity
ABCC1	9606.ENSP00000382342	GO Function	GO:0015431	ABC-type glutathione S-conjugate transporter activity
ABCC1	9606.ENSP00000382342	GO Function	GO:0015562	Efflux transmembrane transporter activity
ABCC1	9606.ENSP00000382342	GO Function	GO:0016787	Hydrolase activity
ABCC1	9606.ENSP00000382342	GO Function	GO:0017076	Purine nucleotide binding
ABCC1	9606.ENSP00000382342	GO Function	GO:0022804	Active transmembrane transporter activity
ABCC1	9606.ENSP00000382342	GO Function	GO:0022853	Active ion transmembrane transporter activity
ABCC1	9606.ENSP00000382342	GO Function	GO:0022857	Transmembrane transporter activity
ABCC1	9606.ENSP00000382342	GO Function	GO:0030554	Adenyl nucleotide binding
ABCC1	9606.ENSP00000382342	GO Function	GO:0032553	Ribonucleotide binding
ABCC1	9606.ENSP00000382342	GO Function	GO:0032555	Purine ribonucleotide binding
ABCC1	9606.ENSP00000382342	GO Function	GO:0032559	Adenyl ribonucleotide binding
ABCC1	9606.ENSP00000382342	GO Function	GO:0034040	ATPase-coupled lipid transmembrane transporter activity
ABCC1	9606.ENSP00000382342	GO Function	GO:0034634	Glutathione transmembrane transporter activity
ABCC1	9606.ENSP00000382342	GO Function	GO:0035639	Purine ribonucleoside triphosphate binding
ABCC1	9606.ENSP00000382342	GO Function	GO:0035673	Oligopeptide transmembrane transporter activity
ABCC1	9606.ENSP00000382342	GO Function	GO:0036094	Small molecule binding
ABCC1	9606.ENSP00000382342	GO Function	GO:0042626	ATPase-coupled transmembrane transporter activity
ABCC1	9606.ENSP00000382342	GO Function	GO:0042887	Amide transmembrane transporter activity
ABCC1	9606.ENSP00000382342	GO Function	GO:0042910	Xenobiotic transmembrane transporter activity
ABCC1	9606.ENSP00000382342	GO Function	GO:0042937	Tripeptide transmembrane transporter activity
ABCC1	9606.ENSP00000382342	GO Function	GO:0043167	Ion binding
ABCC1	9606.ENSP00000382342	GO Function	GO:0043168	Anion binding
ABCC1	9606.ENSP00000382342	GO Function	GO:0043225	ATPase-coupled inorganic anion transmembrane transporter activity
ABCC1	9606.ENSP00000382342	GO Function	GO:0046943	Carboxylic acid transmembrane transporter activity
ABCC1	9606.ENSP00000382342	GO Function	GO:0072349	Modified amino acid transmembrane transporter activity
ABCC1	9606.ENSP00000382342	GO Function	GO:0090482	Vitamin transmembrane transporter activity
ABCC1	9606.ENSP00000382342	GO Function	GO:0097159	Organic cyclic compound binding
ABCC1	9606.ENSP00000382342	GO Function	GO:0097367	Carbohydrate derivative binding
ABCC1	9606.ENSP00000382342	GO Function	GO:0140359	ABC-type transporter activity
ABCC1	9606.ENSP00000382342	GO Function	GO:0140657	ATP-dependent activity
ABCC1	9606.ENSP00000382342	GO Function	GO:1901265	Nucleoside phosphate binding
ABCC1	9606.ENSP00000382342	GO Function	GO:1901363	Heterocyclic compound binding
ABCC1	9606.ENSP00000382342	GO Function	GO:1901682	Sulfur compound transmembrane transporter activity
ABCC1	9606.ENSP00000382342	GO Function	GO:1904680	Peptide transmembrane transporter activity
ABCC1	9606.ENSP00000382342	GO Component	GO:0005576	Extracellular region
ABCC1	9606.ENSP00000382342	GO Component	GO:0005615	Extracellular space
ABCC1	9606.ENSP00000382342	GO Component	GO:0005886	Plasma membrane
ABCC1	9606.ENSP00000382342	GO Component	GO:0005887	Integral component of plasma membrane
ABCC1	9606.ENSP00000382342	GO Component	GO:0009925	Basal plasma membrane
ABCC1	9606.ENSP00000382342	GO Component	GO:0016020	Membrane
ABCC1	9606.ENSP00000382342	GO Component	GO:0016021	Integral component of membrane
ABCC1	9606.ENSP00000382342	GO Component	GO:0016323	Basolateral plasma membrane
ABCC1	9606.ENSP00000382342	GO Component	GO:0016324	Apical plasma membrane
ABCC1	9606.ENSP00000382342	GO Component	GO:0016328	Lateral plasma membrane
ABCC1	9606.ENSP00000382342	GO Component	GO:0031224	Intrinsic component of membrane
ABCC1	9606.ENSP00000382342	GO Component	GO:0031226	Intrinsic component of plasma membrane
ABCC1	9606.ENSP00000382342	GO Component	GO:0031982	Vesicle
ABCC1	9606.ENSP00000382342	GO Component	GO:0043226	Organelle
ABCC1	9606.ENSP00000382342	GO Component	GO:0043227	Membrane-bounded organelle
ABCC1	9606.ENSP00000382342	GO Component	GO:0043230	Extracellular organelle
ABCC1	9606.ENSP00000382342	GO Component	GO:0045177	Apical part of cell
ABCC1	9606.ENSP00000382342	GO Component	GO:0045178	Basal part of cell
ABCC1	9606.ENSP00000382342	GO Component	GO:0065010	Extracellular membrane-bounded organelle
ABCC1	9606.ENSP00000382342	GO Component	GO:0070062	Extracellular exosome
ABCC1	9606.ENSP00000382342	GO Component	GO:0071944	Cell periphery
ABCC1	9606.ENSP00000382342	GO Component	GO:0098590	Plasma membrane region
ABCC1	9606.ENSP00000382342	GO Component	GO:0110165	Cellular anatomical entity
ABCC1	9606.ENSP00000382342	GO Component	GO:1903561	Extracellular vesicle
ABCC1	9606.ENSP00000382342	STRING clusters	CL:7188	Mixed, incl. Poly(ADP-ribose) polymerase catalytic domain, and Macro domain
ABCC1	9606.ENSP00000382342	STRING clusters	CL:7189	Mixed, incl. Poly(ADP-ribose) polymerase catalytic domain, and Macro domain
ABCC1	9606.ENSP00000382342	STRING clusters	CL:7243	Mixed, incl. TROVE domain, and ABC-type vitamin B12 transporter activity
ABCC1	9606.ENSP00000382342	KEGG	hsa01523	Antifolate resistance
ABCC1	9606.ENSP00000382342	KEGG	hsa02010	ABC transporters
ABCC1	9606.ENSP00000382342	KEGG	hsa04071	Sphingolipid signaling pathway
ABCC1	9606.ENSP00000382342	KEGG	hsa04977	Vitamin digestion and absorption
ABCC1	9606.ENSP00000382342	KEGG	hsa05206	MicroRNAs in cancer
ABCC1	9606.ENSP00000382342	Reactome	HSA-1430728	Metabolism
ABCC1	9606.ENSP00000382342	Reactome	HSA-189445	Metabolism of porphyrins
ABCC1	9606.ENSP00000382342	Reactome	HSA-189483	Heme degradation
ABCC1	9606.ENSP00000382342	Reactome	HSA-196741	Cobalamin (Cbl, vitamin B12) transport and metabolism
ABCC1	9606.ENSP00000382342	Reactome	HSA-196849	Metabolism of water-soluble vitamins and cofactors
ABCC1	9606.ENSP00000382342	Reactome	HSA-196854	Metabolism of vitamins and cofactors
ABCC1	9606.ENSP00000382342	Reactome	HSA-2142691	Synthesis of Leukotrienes (LT) and Eoxins (EX)
ABCC1	9606.ENSP00000382342	Reactome	HSA-2142753	Arachidonic acid metabolism
ABCC1	9606.ENSP00000382342	Reactome	HSA-2262752	Cellular responses to stress
ABCC1	9606.ENSP00000382342	Reactome	HSA-382551	Transport of small molecules
ABCC1	9606.ENSP00000382342	Reactome	HSA-382556	ABC-family proteins mediated transport
ABCC1	9606.ENSP00000382342	Reactome	HSA-556833	Metabolism of lipids
ABCC1	9606.ENSP00000382342	Reactome	HSA-8953897	Cellular responses to stimuli
ABCC1	9606.ENSP00000382342	Reactome	HSA-8978868	Fatty acid metabolism
ABCC1	9606.ENSP00000382342	Reactome	HSA-9707564	Cytoprotection by HMOX1
ABCC1	9606.ENSP00000382342	Reactome	HSA-9711123	Cellular response to chemical stress
ABCC1	9606.ENSP00000382342	Reactome	HSA-9748784	Drug ADME
ABCC1	9606.ENSP00000382342	Reactome	HSA-9753281	Paracetamol ADME
ABCC1	9606.ENSP00000382342	Reactome	HSA-9758890	Transport of RCbl within the body
ABCC1	9606.ENSP00000382342	WikiPathways	WP229	Irinotecan pathway
ABCC1	9606.ENSP00000382342	WikiPathways	WP5171	Leukotriene metabolic pathway
ABCC1	9606.ENSP00000382342	WikiPathways	WP5300	TROP2 regulatory signaling
ABCC1	9606.ENSP00000382342	DISEASES	DOID:0050155	Sensory system disease
ABCC1	9606.ENSP00000382342	DISEASES	DOID:4	Disease
ABCC1	9606.ENSP00000382342	DISEASES	DOID:7	Disease of anatomical entity
ABCC1	9606.ENSP00000382342	DISEASES	DOID:863	Nervous system disease
ABCC1	9606.ENSP00000382342	TISSUES	BTO:0000000	Tissues, cell types and enzyme sources
ABCC1	9606.ENSP00000382342	TISSUES	BTO:0000042	Animal
ABCC1	9606.ENSP00000382342	TISSUES	BTO:0000180	Cervical carcinoma cell
ABCC1	9606.ENSP00000382342	TISSUES	BTO:0000345	Digestive gland
ABCC1	9606.ENSP00000382342	TISSUES	BTO:0000522	Gland
ABCC1	9606.ENSP00000382342	TISSUES	BTO:0000580	Blood cancer cell
ABCC1	9606.ENSP00000382342	TISSUES	BTO:0000583	Bone marrow cancer cell
ABCC1	9606.ENSP00000382342	TISSUES	BTO:0000744	Lymphocytic leukemia cell
ABCC1	9606.ENSP00000382342	TISSUES	BTO:0000759	Liver
ABCC1	9606.ENSP00000382342	TISSUES	BTO:0001271	Leukemia cell
ABCC1	9606.ENSP00000382342	TISSUES	BTO:0001488	Endocrine gland
ABCC1	9606.ENSP00000382342	TISSUES	BTO:0001489	Whole body
ABCC1	9606.ENSP00000382342	TISSUES	BTO:0001491	Viscus
ABCC1	9606.ENSP00000382342	TISSUES	BTO:0001546	Chronic lymphocytic leukemia cell
ABCC1	9606.ENSP00000382342	TISSUES	BTO:0003918	KB-3-1 cell
ABCC1	9606.ENSP00000382342	TISSUES	BTO:0005215	KB-C2 cell
ABCC1	9606.ENSP00000382342	TISSUES	BTO:0005367	H-69AR cell
ABCC1	9606.ENSP00000382342	COMPARTMENTS	GOCC:0005576	Extracellular region
ABCC1	9606.ENSP00000382342	COMPARTMENTS	GOCC:0005615	Extracellular space
ABCC1	9606.ENSP00000382342	COMPARTMENTS	GOCC:0005886	Plasma membrane
ABCC1	9606.ENSP00000382342	COMPARTMENTS	GOCC:0005887	Integral component of plasma membrane
ABCC1	9606.ENSP00000382342	COMPARTMENTS	GOCC:0009925	Basal plasma membrane
ABCC1	9606.ENSP00000382342	COMPARTMENTS	GOCC:0016020	Membrane
ABCC1	9606.ENSP00000382342	COMPARTMENTS	GOCC:0016021	Integral component of membrane
ABCC1	9606.ENSP00000382342	COMPARTMENTS	GOCC:0016323	Basolateral plasma membrane
ABCC1	9606.ENSP00000382342	COMPARTMENTS	GOCC:0016324	Apical plasma membrane
ABCC1	9606.ENSP00000382342	COMPARTMENTS	GOCC:0016328	Lateral plasma membrane
ABCC1	9606.ENSP00000382342	COMPARTMENTS	GOCC:0031224	Intrinsic component of membrane
ABCC1	9606.ENSP00000382342	COMPARTMENTS	GOCC:0031226	Intrinsic component of plasma membrane
ABCC1	9606.ENSP00000382342	COMPARTMENTS	GOCC:0031982	Vesicle
ABCC1	9606.ENSP00000382342	COMPARTMENTS	GOCC:0032991	Protein-containing complex
ABCC1	9606.ENSP00000382342	COMPARTMENTS	GOCC:0043226	Organelle
ABCC1	9606.ENSP00000382342	COMPARTMENTS	GOCC:0043227	Membrane-bounded organelle
ABCC1	9606.ENSP00000382342	COMPARTMENTS	GOCC:0043230	Extracellular organelle
ABCC1	9606.ENSP00000382342	COMPARTMENTS	GOCC:0045177	Apical part of cell
ABCC1	9606.ENSP00000382342	COMPARTMENTS	GOCC:0045178	Basal part of cell
ABCC1	9606.ENSP00000382342	COMPARTMENTS	GOCC:0065010	Extracellular membrane-bounded organelle
ABCC1	9606.ENSP00000382342	COMPARTMENTS	GOCC:0070062	Extracellular exosome
ABCC1	9606.ENSP00000382342	COMPARTMENTS	GOCC:0071944	Cell periphery
ABCC1	9606.ENSP00000382342	COMPARTMENTS	GOCC:0098590	Plasma membrane region
ABCC1	9606.ENSP00000382342	COMPARTMENTS	GOCC:0098796	Membrane protein complex
ABCC1	9606.ENSP00000382342	COMPARTMENTS	GOCC:0110165	Cellular anatomical entity
ABCC1	9606.ENSP00000382342	COMPARTMENTS	GOCC:1902495	Transmembrane transporter complex
ABCC1	9606.ENSP00000382342	COMPARTMENTS	GOCC:1903561	Extracellular vesicle
ABCC1	9606.ENSP00000382342	COMPARTMENTS	GOCC:1990281	Efflux pump complex
ABCC1	9606.ENSP00000382342	COMPARTMENTS	GOCC:1990351	Transporter complex
ABCC1	9606.ENSP00000382342	Monarch	EFO:0000556	Ischemia
ABCC1	9606.ENSP00000382342	Monarch	EFO:0004302	Anthropometric measurement
ABCC1	9606.ENSP00000382342	Monarch	EFO:0004306	Erythrocyte indices
ABCC1	9606.ENSP00000382342	Monarch	EFO:0004308	Leukocyte count
ABCC1	9606.ENSP00000382342	Monarch	EFO:0004324	Body weights and measures
ABCC1	9606.ENSP00000382342	Monarch	EFO:0004339	Body height
ABCC1	9606.ENSP00000382342	Monarch	EFO:0004342	Waist circumference
ABCC1	9606.ENSP00000382342	Monarch	EFO:0004464	Brain measurement
ABCC1	9606.ENSP00000382342	Monarch	EFO:0004468	Glucose measurement
ABCC1	9606.ENSP00000382342	Monarch	EFO:0004503	Hematological measurement
ABCC1	9606.ENSP00000382342	Monarch	EFO:0004509	Hemoglobin measurement
ABCC1	9606.ENSP00000382342	Monarch	EFO:0004512	Bone measurement
ABCC1	9606.ENSP00000382342	Monarch	EFO:0004526	Mean corpuscular volume
ABCC1	9606.ENSP00000382342	Monarch	EFO:0004527	Mean corpuscular hemoglobin
ABCC1	9606.ENSP00000382342	Monarch	EFO:0004528	Mean corpuscular hemoglobin concentration
ABCC1	9606.ENSP00000382342	Monarch	EFO:0004541	HbA1c measurement
ABCC1	9606.ENSP00000382342	Monarch	EFO:0004555	Glycoprotein measurement
ABCC1	9606.ENSP00000382342	Monarch	EFO:0004586	Complete blood cell count
ABCC1	9606.ENSP00000382342	Monarch	EFO:0004587	Lymphocyte count
ABCC1	9606.ENSP00000382342	Monarch	EFO:0004725	Metabolite measurement
ABCC1	9606.ENSP00000382342	Monarch	EFO:0004742	Renal system measurement
ABCC1	9606.ENSP00000382342	Monarch	EFO:0004747	Protein measurement
ABCC1	9606.ENSP00000382342	Monarch	EFO:0004872	Inflammatory biomarker measurement
ABCC1	9606.ENSP00000382342	Monarch	EFO:0005047	Erythrocyte measurement
ABCC1	9606.ENSP00000382342	Monarch	EFO:0005090	Basophil count
ABCC1	9606.ENSP00000382342	Monarch	EFO:0005093	Hip circumference
ABCC1	9606.ENSP00000382342	Monarch	EFO:0005192	Red blood cell distribution width
ABCC1	9606.ENSP00000382342	Monarch	EFO:0005208	Glomerular filtration rate
ABCC1	9606.ENSP00000382342	Monarch	EFO:0005653	Serum metabolite measurement
ABCC1	9606.ENSP00000382342	Monarch	EFO:0005664	Blood metabolite measurement
ABCC1	9606.ENSP00000382342	Monarch	EFO:0006842	Diabetes mellitus biomarker
ABCC1	9606.ENSP00000382342	Monarch	EFO:0006843	Infectious disease biomarker
ABCC1	9606.ENSP00000382342	Monarch	EFO:0007789	BMI-adjusted waist circumference
ABCC1	9606.ENSP00000382342	Monarch	EFO:0007987	Granulocyte count
ABCC1	9606.ENSP00000382342	Monarch	EFO:0007988	Myeloid white cell count
ABCC1	9606.ENSP00000382342	Monarch	EFO:0007992	Basophil percentage of leukocytes
ABCC1	9606.ENSP00000382342	Monarch	EFO:0008039	BMI-adjusted hip circumference
ABCC1	9606.ENSP00000382342	Monarch	EFO:0008337	Psychosis predisposition measurement
ABCC1	9606.ENSP00000382342	Monarch	EFO:0010570	Ventricular enlargement measurement
ABCC1	9606.ENSP00000382342	Monarch	EFO:0010700	Reticulocyte measurement
ABCC1	9606.ENSP00000382342	Monarch	EFO:0010701	Mean reticulocyte volume
ABCC1	9606.ENSP00000382342	Monarch	HP:0000118	Phenotypic abnormality
ABCC1	9606.ENSP00000382342	Monarch	HP:0000707	Abnormality of the nervous system
ABCC1	9606.ENSP00000382342	Monarch	HP:0001297	Stroke
ABCC1	9606.ENSP00000382342	Monarch	HP:0001626	Abnormality of the cardiovascular system
ABCC1	9606.ENSP00000382342	Monarch	HP:0002011	Morphological central nervous system abnormality
ABCC1	9606.ENSP00000382342	Monarch	HP:0002060	Abnormal cerebral morphology
ABCC1	9606.ENSP00000382342	Monarch	HP:0002140	Ischemic stroke
ABCC1	9606.ENSP00000382342	Monarch	HP:0002597	Abnormality of the vasculature
ABCC1	9606.ENSP00000382342	Monarch	HP:0002637	Cerebral ischemia
ABCC1	9606.ENSP00000382342	Monarch	HP:0011025	Abnormal cardiovascular system physiology
ABCC1	9606.ENSP00000382342	Monarch	HP:0012443	Abnormality of brain morphology
ABCC1	9606.ENSP00000382342	Monarch	HP:0012639	Abnormal nervous system morphology
ABCC1	9606.ENSP00000382342	Monarch	HP:0025015	Abnormal vascular morphology
ABCC1	9606.ENSP00000382342	Monarch	HP:0025323	Abnormal arterial physiology
ABCC1	9606.ENSP00000382342	Monarch	HP:0025722	Cerebral infarct
ABCC1	9606.ENSP00000382342	Monarch	HP:0030163	Abnormal vascular physiology
ABCC1	9606.ENSP00000382342	Monarch	HP:0030680	Abnormality of cardiovascular system morphology
ABCC1	9606.ENSP00000382342	Monarch	HP:0033401	Tissue ischemia
ABCC1	9606.ENSP00000382342	Monarch	HP:0100547	Abnormal forebrain morphology
ABCC1	9606.ENSP00000382342	Monarch	HP:0100659	Abnormal cerebral vascular morphology
ABCC1	9606.ENSP00000382342	UniProt Keywords	KW-0025	Alternative splicing
ABCC1	9606.ENSP00000382342	UniProt Keywords	KW-0067	ATP-binding
ABCC1	9606.ENSP00000382342	UniProt Keywords	KW-0325	Glycoprotein
ABCC1	9606.ENSP00000382342	UniProt Keywords	KW-0378	Hydrolase
ABCC1	9606.ENSP00000382342	UniProt Keywords	KW-0472	Membrane
ABCC1	9606.ENSP00000382342	UniProt Keywords	KW-0547	Nucleotide-binding
ABCC1	9606.ENSP00000382342	UniProt Keywords	KW-0597	Phosphoprotein
ABCC1	9606.ENSP00000382342	UniProt Keywords	KW-0677	Repeat
ABCC1	9606.ENSP00000382342	UniProt Keywords	KW-0812	Transmembrane
ABCC1	9606.ENSP00000382342	UniProt Keywords	KW-0813	Transport
ABCC1	9606.ENSP00000382342	UniProt Keywords	KW-1003	Cell membrane
ABCC1	9606.ENSP00000382342	UniProt Keywords	KW-1133	Transmembrane helix
ABCC1	9606.ENSP00000382342	UniProt Keywords	KW-1278	Translocase
ABCC1	9606.ENSP00000382342	Pfam	PF00664	ABC transporter transmembrane region
ABCC1	9606.ENSP00000382342	InterPro	IPR003439	ABC transporter-like, ATP-binding domain
ABCC1	9606.ENSP00000382342	InterPro	IPR003593	AAA+ ATPase domain
ABCC1	9606.ENSP00000382342	InterPro	IPR005292	Multi drug resistance-associated protein
ABCC1	9606.ENSP00000382342	InterPro	IPR011527	ABC transporter type 1, transmembrane domain
ABCC1	9606.ENSP00000382342	InterPro	IPR017871	ABC transporter-like, conserved site
ABCC1	9606.ENSP00000382342	InterPro	IPR027417	P-loop containing nucleoside triphosphate hydrolase
ABCC1	9606.ENSP00000382342	InterPro	IPR036640	ABC transporter type 1, transmembrane domain superfamily
ABCC1	9606.ENSP00000382342	SMART	SM00382	ATPases associated with a variety of cellular activities
ABCD1	9606.ENSP00000218104	GO Process	GO:0000038	Very long-chain fatty acid metabolic process
ABCD1	9606.ENSP00000218104	GO Process	GO:0001676	Long-chain fatty acid metabolic process
ABCD1	9606.ENSP00000218104	GO Process	GO:0001817	Regulation of cytokine production
ABCD1	9606.ENSP00000218104	GO Process	GO:0001818	Negative regulation of cytokine production
ABCD1	9606.ENSP00000218104	GO Process	GO:0002082	Regulation of oxidative phosphorylation
ABCD1	9606.ENSP00000218104	GO Process	GO:0003254	Regulation of membrane depolarization
ABCD1	9606.ENSP00000218104	GO Process	GO:0006082	Organic acid metabolic process
ABCD1	9606.ENSP00000218104	GO Process	GO:0006139	Nucleobase-containing compound metabolic process
ABCD1	9606.ENSP00000218104	GO Process	GO:0006163	Purine nucleotide metabolic process
ABCD1	9606.ENSP00000218104	GO Process	GO:0006195	Purine nucleotide catabolic process
ABCD1	9606.ENSP00000218104	GO Process	GO:0006629	Lipid metabolic process
ABCD1	9606.ENSP00000218104	GO Process	GO:0006631	Fatty acid metabolic process
ABCD1	9606.ENSP00000218104	GO Process	GO:0006633	Fatty acid biosynthetic process
ABCD1	9606.ENSP00000218104	GO Process	GO:0006635	Fatty acid beta-oxidation
ABCD1	9606.ENSP00000218104	GO Process	GO:0006637	acyl-CoA metabolic process
ABCD1	9606.ENSP00000218104	GO Process	GO:0006725	Cellular aromatic compound metabolic process
ABCD1	9606.ENSP00000218104	GO Process	GO:0006753	Nucleoside phosphate metabolic process
ABCD1	9606.ENSP00000218104	GO Process	GO:0006790	Sulfur compound metabolic process
ABCD1	9606.ENSP00000218104	GO Process	GO:0006793	Phosphorus metabolic process
ABCD1	9606.ENSP00000218104	GO Process	GO:0006796	Phosphate-containing compound metabolic process
ABCD1	9606.ENSP00000218104	GO Process	GO:0006807	Nitrogen compound metabolic process
ABCD1	9606.ENSP00000218104	GO Process	GO:0006810	Transport
ABCD1	9606.ENSP00000218104	GO Process	GO:0006862	Nucleotide transport
ABCD1	9606.ENSP00000218104	GO Process	GO:0006869	Lipid transport
ABCD1	9606.ENSP00000218104	GO Process	GO:0006996	Organelle organization
ABCD1	9606.ENSP00000218104	GO Process	GO:0007009	Plasma membrane organization
ABCD1	9606.ENSP00000218104	GO Process	GO:0007031	Peroxisome organization
ABCD1	9606.ENSP00000218104	GO Process	GO:0007272	Ensheathment of neurons
ABCD1	9606.ENSP00000218104	GO Process	GO:0007275	Multicellular organism development
ABCD1	9606.ENSP00000218104	GO Process	GO:0007399	Nervous system development
ABCD1	9606.ENSP00000218104	GO Process	GO:0008152	Metabolic process
ABCD1	9606.ENSP00000218104	GO Process	GO:0008366	Axon ensheathment
ABCD1	9606.ENSP00000218104	GO Process	GO:0008610	Lipid biosynthetic process
ABCD1	9606.ENSP00000218104	GO Process	GO:0009056	Catabolic process
ABCD1	9606.ENSP00000218104	GO Process	GO:0009058	Biosynthetic process
ABCD1	9606.ENSP00000218104	GO Process	GO:0009062	Fatty acid catabolic process
ABCD1	9606.ENSP00000218104	GO Process	GO:0009117	Nucleotide metabolic process
ABCD1	9606.ENSP00000218104	GO Process	GO:0009150	Purine ribonucleotide metabolic process
ABCD1	9606.ENSP00000218104	GO Process	GO:0009154	Purine ribonucleotide catabolic process
ABCD1	9606.ENSP00000218104	GO Process	GO:0009166	Nucleotide catabolic process
ABCD1	9606.ENSP00000218104	GO Process	GO:0009259	Ribonucleotide metabolic process
ABCD1	9606.ENSP00000218104	GO Process	GO:0009261	Ribonucleotide catabolic process
ABCD1	9606.ENSP00000218104	GO Process	GO:0009889	Regulation of biosynthetic process
ABCD1	9606.ENSP00000218104	GO Process	GO:0009890	Negative regulation of biosynthetic process
ABCD1	9606.ENSP00000218104	GO Process	GO:0009891	Positive regulation of biosynthetic process
ABCD1	9606.ENSP00000218104	GO Process	GO:0009892	Negative regulation of metabolic process
ABCD1	9606.ENSP00000218104	GO Process	GO:0009893	Positive regulation of metabolic process
ABCD1	9606.ENSP00000218104	GO Process	GO:0009894	Regulation of catabolic process
ABCD1	9606.ENSP00000218104	GO Process	GO:0009896	Positive regulation of catabolic process
ABCD1	9606.ENSP00000218104	GO Process	GO:0009987	Cellular process
ABCD1	9606.ENSP00000218104	GO Process	GO:0010256	Endomembrane system organization
ABCD1	9606.ENSP00000218104	GO Process	GO:0010468	Regulation of gene expression
ABCD1	9606.ENSP00000218104	GO Process	GO:0010565	Regulation of cellular ketone metabolic process
ABCD1	9606.ENSP00000218104	GO Process	GO:0010605	Negative regulation of macromolecule metabolic process
ABCD1	9606.ENSP00000218104	GO Process	GO:0010629	Negative regulation of gene expression
ABCD1	9606.ENSP00000218104	GO Process	GO:0010876	Lipid localization
ABCD1	9606.ENSP00000218104	GO Process	GO:0015748	Organophosphate ester transport
ABCD1	9606.ENSP00000218104	GO Process	GO:0015849	Organic acid transport
ABCD1	9606.ENSP00000218104	GO Process	GO:0015865	Purine nucleotide transport
ABCD1	9606.ENSP00000218104	GO Process	GO:0015868	Purine ribonucleotide transport
ABCD1	9606.ENSP00000218104	GO Process	GO:0015908	Fatty acid transport
ABCD1	9606.ENSP00000218104	GO Process	GO:0015909	Long-chain fatty acid transport
ABCD1	9606.ENSP00000218104	GO Process	GO:0015910	Long-chain fatty acid import into peroxisome
ABCD1	9606.ENSP00000218104	GO Process	GO:0015916	fatty-acyl-CoA transport
ABCD1	9606.ENSP00000218104	GO Process	GO:0015919	Peroxisomal membrane transport
ABCD1	9606.ENSP00000218104	GO Process	GO:0015931	Nucleobase-containing compound transport
ABCD1	9606.ENSP00000218104	GO Process	GO:0016042	Lipid catabolic process
ABCD1	9606.ENSP00000218104	GO Process	GO:0016043	Cellular component organization
ABCD1	9606.ENSP00000218104	GO Process	GO:0016053	Organic acid biosynthetic process
ABCD1	9606.ENSP00000218104	GO Process	GO:0016054	Organic acid catabolic process
ABCD1	9606.ENSP00000218104	GO Process	GO:0019216	Regulation of lipid metabolic process
ABCD1	9606.ENSP00000218104	GO Process	GO:0019217	Regulation of fatty acid metabolic process
ABCD1	9606.ENSP00000218104	GO Process	GO:0019222	Regulation of metabolic process
ABCD1	9606.ENSP00000218104	GO Process	GO:0019395	Fatty acid oxidation
ABCD1	9606.ENSP00000218104	GO Process	GO:0019439	Aromatic compound catabolic process
ABCD1	9606.ENSP00000218104	GO Process	GO:0019637	Organophosphate metabolic process
ABCD1	9606.ENSP00000218104	GO Process	GO:0019693	Ribose phosphate metabolic process
ABCD1	9606.ENSP00000218104	GO Process	GO:0019752	Carboxylic acid metabolic process
ABCD1	9606.ENSP00000218104	GO Process	GO:0030030	Cell projection organization
ABCD1	9606.ENSP00000218104	GO Process	GO:0030258	Lipid modification
ABCD1	9606.ENSP00000218104	GO Process	GO:0030497	Fatty acid elongation
ABCD1	9606.ENSP00000218104	GO Process	GO:0031323	Regulation of cellular metabolic process
ABCD1	9606.ENSP00000218104	GO Process	GO:0031324	Negative regulation of cellular metabolic process
ABCD1	9606.ENSP00000218104	GO Process	GO:0031325	Positive regulation of cellular metabolic process
ABCD1	9606.ENSP00000218104	GO Process	GO:0031326	Regulation of cellular biosynthetic process
ABCD1	9606.ENSP00000218104	GO Process	GO:0031328	Positive regulation of cellular biosynthetic process
ABCD1	9606.ENSP00000218104	GO Process	GO:0031329	Regulation of cellular catabolic process
ABCD1	9606.ENSP00000218104	GO Process	GO:0031331	Positive regulation of cellular catabolic process
ABCD1	9606.ENSP00000218104	GO Process	GO:0031998	Regulation of fatty acid beta-oxidation
ABCD1	9606.ENSP00000218104	GO Process	GO:0032000	Positive regulation of fatty acid beta-oxidation
ABCD1	9606.ENSP00000218104	GO Process	GO:0032365	Intracellular lipid transport
ABCD1	9606.ENSP00000218104	GO Process	GO:0032501	Multicellular organismal process
ABCD1	9606.ENSP00000218104	GO Process	GO:0032502	Developmental process
ABCD1	9606.ENSP00000218104	GO Process	GO:0032787	Monocarboxylic acid metabolic process
ABCD1	9606.ENSP00000218104	GO Process	GO:0033036	Macromolecule localization
ABCD1	9606.ENSP00000218104	GO Process	GO:0033559	Unsaturated fatty acid metabolic process
ABCD1	9606.ENSP00000218104	GO Process	GO:0033865	Nucleoside bisphosphate metabolic process
ABCD1	9606.ENSP00000218104	GO Process	GO:0033869	Nucleoside bisphosphate catabolic process
ABCD1	9606.ENSP00000218104	GO Process	GO:0033875	Ribonucleoside bisphosphate metabolic process
ABCD1	9606.ENSP00000218104	GO Process	GO:0034031	Ribonucleoside bisphosphate catabolic process
ABCD1	9606.ENSP00000218104	GO Process	GO:0034032	Purine nucleoside bisphosphate metabolic process
ABCD1	9606.ENSP00000218104	GO Process	GO:0034034	Purine nucleoside bisphosphate catabolic process
ABCD1	9606.ENSP00000218104	GO Process	GO:0034440	Lipid oxidation
ABCD1	9606.ENSP00000218104	GO Process	GO:0034641	Cellular nitrogen compound metabolic process
ABCD1	9606.ENSP00000218104	GO Process	GO:0034655	Nucleobase-containing compound catabolic process
ABCD1	9606.ENSP00000218104	GO Process	GO:0035337	fatty-acyl-CoA metabolic process
ABCD1	9606.ENSP00000218104	GO Process	GO:0035383	Thioester metabolic process
ABCD1	9606.ENSP00000218104	GO Process	GO:0036109	Alpha-linolenic acid metabolic process
ABCD1	9606.ENSP00000218104	GO Process	GO:0036111	Very long-chain fatty-acyl-CoA metabolic process
ABCD1	9606.ENSP00000218104	GO Process	GO:0036113	Very long-chain fatty-acyl-CoA catabolic process
ABCD1	9606.ENSP00000218104	GO Process	GO:0036115	fatty-acyl-CoA catabolic process
ABCD1	9606.ENSP00000218104	GO Process	GO:0042304	Regulation of fatty acid biosynthetic process
ABCD1	9606.ENSP00000218104	GO Process	GO:0042391	Regulation of membrane potential
ABCD1	9606.ENSP00000218104	GO Process	GO:0042552	Myelination
ABCD1	9606.ENSP00000218104	GO Process	GO:0042592	Homeostatic process
ABCD1	9606.ENSP00000218104	GO Process	GO:0042758	Long-chain fatty acid catabolic process
ABCD1	9606.ENSP00000218104	GO Process	GO:0042760	Very long-chain fatty acid catabolic process
ABCD1	9606.ENSP00000218104	GO Process	GO:0042886	Amide transport
ABCD1	9606.ENSP00000218104	GO Process	GO:0043217	Myelin maintenance
ABCD1	9606.ENSP00000218104	GO Process	GO:0043436	Oxoacid metabolic process
ABCD1	9606.ENSP00000218104	GO Process	GO:0043457	Regulation of cellular respiration
ABCD1	9606.ENSP00000218104	GO Process	GO:0043467	Regulation of generation of precursor metabolites and energy
ABCD1	9606.ENSP00000218104	GO Process	GO:0043574	Peroxisomal transport
ABCD1	9606.ENSP00000218104	GO Process	GO:0043603	Cellular amide metabolic process
ABCD1	9606.ENSP00000218104	GO Process	GO:0043651	Linoleic acid metabolic process
ABCD1	9606.ENSP00000218104	GO Process	GO:0044237	Cellular metabolic process
ABCD1	9606.ENSP00000218104	GO Process	GO:0044238	Primary metabolic process
ABCD1	9606.ENSP00000218104	GO Process	GO:0044242	Cellular lipid catabolic process
ABCD1	9606.ENSP00000218104	GO Process	GO:0044248	Cellular catabolic process
ABCD1	9606.ENSP00000218104	GO Process	GO:0044249	Cellular biosynthetic process
ABCD1	9606.ENSP00000218104	GO Process	GO:0044255	Cellular lipid metabolic process
ABCD1	9606.ENSP00000218104	GO Process	GO:0044270	Cellular nitrogen compound catabolic process
ABCD1	9606.ENSP00000218104	GO Process	GO:0044273	Sulfur compound catabolic process
ABCD1	9606.ENSP00000218104	GO Process	GO:0044281	Small molecule metabolic process
ABCD1	9606.ENSP00000218104	GO Process	GO:0044282	Small molecule catabolic process
ABCD1	9606.ENSP00000218104	GO Process	GO:0044283	Small molecule biosynthetic process
ABCD1	9606.ENSP00000218104	GO Process	GO:0045723	Positive regulation of fatty acid biosynthetic process
ABCD1	9606.ENSP00000218104	GO Process	GO:0045834	Positive regulation of lipid metabolic process
ABCD1	9606.ENSP00000218104	GO Process	GO:0045923	Positive regulation of fatty acid metabolic process
ABCD1	9606.ENSP00000218104	GO Process	GO:0046320	Regulation of fatty acid oxidation
ABCD1	9606.ENSP00000218104	GO Process	GO:0046321	Positive regulation of fatty acid oxidation
ABCD1	9606.ENSP00000218104	GO Process	GO:0046394	Carboxylic acid biosynthetic process
ABCD1	9606.ENSP00000218104	GO Process	GO:0046395	Carboxylic acid catabolic process
ABCD1	9606.ENSP00000218104	GO Process	GO:0046434	Organophosphate catabolic process
ABCD1	9606.ENSP00000218104	GO Process	GO:0046483	Heterocycle metabolic process
ABCD1	9606.ENSP00000218104	GO Process	GO:0046700	Heterocycle catabolic process
ABCD1	9606.ENSP00000218104	GO Process	GO:0046889	Positive regulation of lipid biosynthetic process
ABCD1	9606.ENSP00000218104	GO Process	GO:0046890	Regulation of lipid biosynthetic process
ABCD1	9606.ENSP00000218104	GO Process	GO:0046907	Intracellular transport
ABCD1	9606.ENSP00000218104	GO Process	GO:0048518	Positive regulation of biological process
ABCD1	9606.ENSP00000218104	GO Process	GO:0048519	Negative regulation of biological process
ABCD1	9606.ENSP00000218104	GO Process	GO:0048522	Positive regulation of cellular process
ABCD1	9606.ENSP00000218104	GO Process	GO:0048523	Negative regulation of cellular process
ABCD1	9606.ENSP00000218104	GO Process	GO:0048583	Regulation of response to stimulus
ABCD1	9606.ENSP00000218104	GO Process	GO:0048731	System development
ABCD1	9606.ENSP00000218104	GO Process	GO:0048856	Anatomical structure development
ABCD1	9606.ENSP00000218104	GO Process	GO:0048878	Chemical homeostasis
ABCD1	9606.ENSP00000218104	GO Process	GO:0050789	Regulation of biological process
ABCD1	9606.ENSP00000218104	GO Process	GO:0050794	Regulation of cellular process
ABCD1	9606.ENSP00000218104	GO Process	GO:0050994	Regulation of lipid catabolic process
ABCD1	9606.ENSP00000218104	GO Process	GO:0050996	Positive regulation of lipid catabolic process
ABCD1	9606.ENSP00000218104	GO Process	GO:0051179	Localization
ABCD1	9606.ENSP00000218104	GO Process	GO:0051234	Establishment of localization
ABCD1	9606.ENSP00000218104	GO Process	GO:0051239	Regulation of multicellular organismal process
ABCD1	9606.ENSP00000218104	GO Process	GO:0051241	Negative regulation of multicellular organismal process
ABCD1	9606.ENSP00000218104	GO Process	GO:0051503	Adenine nucleotide transport
ABCD1	9606.ENSP00000218104	GO Process	GO:0051641	Cellular localization
ABCD1	9606.ENSP00000218104	GO Process	GO:0051649	Establishment of localization in cell
ABCD1	9606.ENSP00000218104	GO Process	GO:0051881	Regulation of mitochondrial membrane potential
ABCD1	9606.ENSP00000218104	GO Process	GO:0051900	Regulation of mitochondrial depolarization
ABCD1	9606.ENSP00000218104	GO Process	GO:0055085	Transmembrane transport
ABCD1	9606.ENSP00000218104	GO Process	GO:0055086	Nucleobase-containing small molecule metabolic process
ABCD1	9606.ENSP00000218104	GO Process	GO:0055088	Lipid homeostasis
ABCD1	9606.ENSP00000218104	GO Process	GO:0055089	Fatty acid homeostasis
ABCD1	9606.ENSP00000218104	GO Process	GO:0055092	Sterol homeostasis
ABCD1	9606.ENSP00000218104	GO Process	GO:0060255	Regulation of macromolecule metabolic process
ABCD1	9606.ENSP00000218104	GO Process	GO:0061024	Membrane organization
ABCD1	9606.ENSP00000218104	GO Process	GO:0062012	Regulation of small molecule metabolic process
ABCD1	9606.ENSP00000218104	GO Process	GO:0062013	Positive regulation of small molecule metabolic process
ABCD1	9606.ENSP00000218104	GO Process	GO:0065007	Biological regulation
ABCD1	9606.ENSP00000218104	GO Process	GO:0065008	Regulation of biological quality
ABCD1	9606.ENSP00000218104	GO Process	GO:0071106	Adenosine 3,5-bisphosphate transmembrane transport
ABCD1	9606.ENSP00000218104	GO Process	GO:0071702	Organic substance transport
ABCD1	9606.ENSP00000218104	GO Process	GO:0071704	Organic substance metabolic process
ABCD1	9606.ENSP00000218104	GO Process	GO:0071705	Nitrogen compound transport
ABCD1	9606.ENSP00000218104	GO Process	GO:0071840	Cellular component organization or biogenesis
ABCD1	9606.ENSP00000218104	GO Process	GO:0072329	Monocarboxylic acid catabolic process
ABCD1	9606.ENSP00000218104	GO Process	GO:0072330	Monocarboxylic acid biosynthetic process
ABCD1	9606.ENSP00000218104	GO Process	GO:0072348	Sulfur compound transport
ABCD1	9606.ENSP00000218104	GO Process	GO:0072521	Purine-containing compound metabolic process
ABCD1	9606.ENSP00000218104	GO Process	GO:0072523	Purine-containing compound catabolic process
ABCD1	9606.ENSP00000218104	GO Process	GO:0072530	Purine-containing compound transmembrane transport
ABCD1	9606.ENSP00000218104	GO Process	GO:0080090	Regulation of primary metabolic process
ABCD1	9606.ENSP00000218104	GO Process	GO:0080134	Regulation of response to stress
ABCD1	9606.ENSP00000218104	GO Process	GO:0080135	Regulation of cellular response to stress
ABCD1	9606.ENSP00000218104	GO Process	GO:0106027	Neuron projection organization
ABCD1	9606.ENSP00000218104	GO Process	GO:0120036	Plasma membrane bounded cell projection organization
ABCD1	9606.ENSP00000218104	GO Process	GO:0120254	Olefinic compound metabolic process
ABCD1	9606.ENSP00000218104	GO Process	GO:1900015	Regulation of cytokine production involved in inflammatory response
ABCD1	9606.ENSP00000218104	GO Process	GO:1900016	Negative regulation of cytokine production involved in inflammatory response
ABCD1	9606.ENSP00000218104	GO Process	GO:1900407	Regulation of cellular response to oxidative stress
ABCD1	9606.ENSP00000218104	GO Process	GO:1901135	Carbohydrate derivative metabolic process
ABCD1	9606.ENSP00000218104	GO Process	GO:1901136	Carbohydrate derivative catabolic process
ABCD1	9606.ENSP00000218104	GO Process	GO:1901264	Carbohydrate derivative transport
ABCD1	9606.ENSP00000218104	GO Process	GO:1901292	Nucleoside phosphate catabolic process
ABCD1	9606.ENSP00000218104	GO Process	GO:1901337	Thioester transport
ABCD1	9606.ENSP00000218104	GO Process	GO:1901360	Organic cyclic compound metabolic process
ABCD1	9606.ENSP00000218104	GO Process	GO:1901361	Organic cyclic compound catabolic process
ABCD1	9606.ENSP00000218104	GO Process	GO:1901564	Organonitrogen compound metabolic process
ABCD1	9606.ENSP00000218104	GO Process	GO:1901565	Organonitrogen compound catabolic process
ABCD1	9606.ENSP00000218104	GO Process	GO:1901568	Fatty acid derivative metabolic process
ABCD1	9606.ENSP00000218104	GO Process	GO:1901569	Fatty acid derivative catabolic process
ABCD1	9606.ENSP00000218104	GO Process	GO:1901575	Organic substance catabolic process
ABCD1	9606.ENSP00000218104	GO Process	GO:1901576	Organic substance biosynthetic process
ABCD1	9606.ENSP00000218104	GO Process	GO:1901679	Nucleotide transmembrane transport
ABCD1	9606.ENSP00000218104	GO Process	GO:1902001	Fatty acid transmembrane transport
ABCD1	9606.ENSP00000218104	GO Process	GO:1902882	Regulation of response to oxidative stress
ABCD1	9606.ENSP00000218104	GO Process	GO:1903426	Regulation of reactive oxygen species biosynthetic process
ABCD1	9606.ENSP00000218104	GO Process	GO:1903427	Negative regulation of reactive oxygen species biosynthetic process
ABCD1	9606.ENSP00000218104	GO Process	GO:1903715	Regulation of aerobic respiration
ABCD1	9606.ENSP00000218104	GO Process	GO:1903825	Organic acid transmembrane transport
ABCD1	9606.ENSP00000218104	GO Process	GO:1905039	Carboxylic acid transmembrane transport
ABCD1	9606.ENSP00000218104	GO Process	GO:1990535	Neuron projection maintenance
ABCD1	9606.ENSP00000218104	GO Process	GO:2000377	Regulation of reactive oxygen species metabolic process
ABCD1	9606.ENSP00000218104	GO Process	GO:2000378	Negative regulation of reactive oxygen species metabolic process
ABCD1	9606.ENSP00000218104	GO Process	GO:2001279	Regulation of unsaturated fatty acid biosynthetic process
ABCD1	9606.ENSP00000218104	GO Process	GO:2001280	Positive regulation of unsaturated fatty acid biosynthetic process
ABCD1	9606.ENSP00000218104	GO Function	GO:0000166	Nucleotide binding
ABCD1	9606.ENSP00000218104	GO Function	GO:0000295	Adenine nucleotide transmembrane transporter activity
ABCD1	9606.ENSP00000218104	GO Function	GO:0003824	Catalytic activity
ABCD1	9606.ENSP00000218104	GO Function	GO:0005215	Transporter activity
ABCD1	9606.ENSP00000218104	GO Function	GO:0005319	Lipid transporter activity
ABCD1	9606.ENSP00000218104	GO Function	GO:0005324	Long-chain fatty acid transporter activity
ABCD1	9606.ENSP00000218104	GO Function	GO:0005346	Purine ribonucleotide transmembrane transporter activity
ABCD1	9606.ENSP00000218104	GO Function	GO:0005488	Binding
ABCD1	9606.ENSP00000218104	GO Function	GO:0005515	Protein binding
ABCD1	9606.ENSP00000218104	GO Function	GO:0005524	ATP binding
ABCD1	9606.ENSP00000218104	GO Function	GO:0015215	Nucleotide transmembrane transporter activity
ABCD1	9606.ENSP00000218104	GO Function	GO:0015216	Purine nucleotide transmembrane transporter activity
ABCD1	9606.ENSP00000218104	GO Function	GO:0015399	Primary active transmembrane transporter activity
ABCD1	9606.ENSP00000218104	GO Function	GO:0015605	Organophosphate ester transmembrane transporter activity
ABCD1	9606.ENSP00000218104	GO Function	GO:0015607	ABC-type fatty-acyl-CoA transporter activity
ABCD1	9606.ENSP00000218104	GO Function	GO:0015932	Nucleobase-containing compound transmembrane transporter activity
ABCD1	9606.ENSP00000218104	GO Function	GO:0016289	CoA hydrolase activity
ABCD1	9606.ENSP00000218104	GO Function	GO:0016462	Pyrophosphatase activity
ABCD1	9606.ENSP00000218104	GO Function	GO:0016787	Hydrolase activity
ABCD1	9606.ENSP00000218104	GO Function	GO:0016788	Hydrolase activity, acting on ester bonds
ABCD1	9606.ENSP00000218104	GO Function	GO:0016790	Thiolester hydrolase activity
ABCD1	9606.ENSP00000218104	GO Function	GO:0016817	Hydrolase activity, acting on acid anhydrides
ABCD1	9606.ENSP00000218104	GO Function	GO:0016818	Hydrolase activity, acting on acid anhydrides, in phosphorus-containing anhydrides
ABCD1	9606.ENSP00000218104	GO Function	GO:0016887	ATP hydrolysis activity
ABCD1	9606.ENSP00000218104	GO Function	GO:0017076	Purine nucleotide binding
ABCD1	9606.ENSP00000218104	GO Function	GO:0017111	Nucleoside-triphosphatase activity
ABCD1	9606.ENSP00000218104	GO Function	GO:0019899	Enzyme binding
ABCD1	9606.ENSP00000218104	GO Function	GO:0022804	Active transmembrane transporter activity
ABCD1	9606.ENSP00000218104	GO Function	GO:0022857	Transmembrane transporter activity
ABCD1	9606.ENSP00000218104	GO Function	GO:0030554	Adenyl nucleotide binding
ABCD1	9606.ENSP00000218104	GO Function	GO:0032553	Ribonucleotide binding
ABCD1	9606.ENSP00000218104	GO Function	GO:0032555	Purine ribonucleotide binding
ABCD1	9606.ENSP00000218104	GO Function	GO:0032559	Adenyl ribonucleotide binding
ABCD1	9606.ENSP00000218104	GO Function	GO:0035639	Purine ribonucleoside triphosphate binding
ABCD1	9606.ENSP00000218104	GO Function	GO:0036094	Small molecule binding
ABCD1	9606.ENSP00000218104	GO Function	GO:0042626	ATPase-coupled transmembrane transporter activity
ABCD1	9606.ENSP00000218104	GO Function	GO:0042802	Identical protein binding
ABCD1	9606.ENSP00000218104	GO Function	GO:0042803	Protein homodimerization activity
ABCD1	9606.ENSP00000218104	GO Function	GO:0042887	Amide transmembrane transporter activity
ABCD1	9606.ENSP00000218104	GO Function	GO:0043167	Ion binding
ABCD1	9606.ENSP00000218104	GO Function	GO:0043168	Anion binding
ABCD1	9606.ENSP00000218104	GO Function	GO:0043531	ADP binding
ABCD1	9606.ENSP00000218104	GO Function	GO:0046982	Protein heterodimerization activity
ABCD1	9606.ENSP00000218104	GO Function	GO:0046983	Protein dimerization activity
ABCD1	9606.ENSP00000218104	GO Function	GO:0047617	acyl-CoA hydrolase activity
ABCD1	9606.ENSP00000218104	GO Function	GO:0071077	Adenosine 3,5-bisphosphate transmembrane transporter activity
ABCD1	9606.ENSP00000218104	GO Function	GO:0097159	Organic cyclic compound binding
ABCD1	9606.ENSP00000218104	GO Function	GO:0097367	Carbohydrate derivative binding
ABCD1	9606.ENSP00000218104	GO Function	GO:0140359	ABC-type transporter activity
ABCD1	9606.ENSP00000218104	GO Function	GO:0140657	ATP-dependent activity
ABCD1	9606.ENSP00000218104	GO Function	GO:1901265	Nucleoside phosphate binding
ABCD1	9606.ENSP00000218104	GO Function	GO:1901363	Heterocyclic compound binding
ABCD1	9606.ENSP00000218104	GO Function	GO:1901505	Carbohydrate derivative transmembrane transporter activity
ABCD1	9606.ENSP00000218104	GO Function	GO:1901682	Sulfur compound transmembrane transporter activity
ABCD1	9606.ENSP00000218104	GO Component	GO:0000323	Lytic vacuole
ABCD1	9606.ENSP00000218104	GO Component	GO:0005622	Intracellular anatomical structure
ABCD1	9606.ENSP00000218104	GO Component	GO:0005737	Cytoplasm
ABCD1	9606.ENSP00000218104	GO Component	GO:0005739	Mitochondrion
ABCD1	9606.ENSP00000218104	GO Component	GO:0005740	Mitochondrial envelope
ABCD1	9606.ENSP00000218104	GO Component	GO:0005764	Lysosome
ABCD1	9606.ENSP00000218104	GO Component	GO:0005765	Lysosomal membrane
ABCD1	9606.ENSP00000218104	GO Component	GO:0005773	Vacuole
ABCD1	9606.ENSP00000218104	GO Component	GO:0005774	Vacuolar membrane
ABCD1	9606.ENSP00000218104	GO Component	GO:0005777	Peroxisome
ABCD1	9606.ENSP00000218104	GO Component	GO:0005778	Peroxisomal membrane
ABCD1	9606.ENSP00000218104	GO Component	GO:0005779	Integral component of peroxisomal membrane
ABCD1	9606.ENSP00000218104	GO Component	GO:0005783	Endoplasmic reticulum
ABCD1	9606.ENSP00000218104	GO Component	GO:0005789	Endoplasmic reticulum membrane
ABCD1	9606.ENSP00000218104	GO Component	GO:0005829	Cytosol
ABCD1	9606.ENSP00000218104	GO Component	GO:0012505	Endomembrane system
ABCD1	9606.ENSP00000218104	GO Component	GO:0016020	Membrane
ABCD1	9606.ENSP00000218104	GO Component	GO:0016021	Integral component of membrane
ABCD1	9606.ENSP00000218104	GO Component	GO:0031090	Organelle membrane
ABCD1	9606.ENSP00000218104	GO Component	GO:0031224	Intrinsic component of membrane
ABCD1	9606.ENSP00000218104	GO Component	GO:0031231	Intrinsic component of peroxisomal membrane
ABCD1	9606.ENSP00000218104	GO Component	GO:0031300	Intrinsic component of organelle membrane
ABCD1	9606.ENSP00000218104	GO Component	GO:0031301	Integral component of organelle membrane
ABCD1	9606.ENSP00000218104	GO Component	GO:0031903	Microbody membrane
ABCD1	9606.ENSP00000218104	GO Component	GO:0031966	Mitochondrial membrane
ABCD1	9606.ENSP00000218104	GO Component	GO:0031967	Organelle envelope
ABCD1	9606.ENSP00000218104	GO Component	GO:0031975	Envelope
ABCD1	9606.ENSP00000218104	GO Component	GO:0031984	Organelle subcompartment
ABCD1	9606.ENSP00000218104	GO Component	GO:0042175	Nuclear outer membrane-endoplasmic reticulum membrane network
ABCD1	9606.ENSP00000218104	GO Component	GO:0042579	Microbody
ABCD1	9606.ENSP00000218104	GO Component	GO:0043226	Organelle
ABCD1	9606.ENSP00000218104	GO Component	GO:0043227	Membrane-bounded organelle
ABCD1	9606.ENSP00000218104	GO Component	GO:0043229	Intracellular organelle
ABCD1	9606.ENSP00000218104	GO Component	GO:0043231	Intracellular membrane-bounded organelle
ABCD1	9606.ENSP00000218104	GO Component	GO:0048471	Perinuclear region of cytoplasm
ABCD1	9606.ENSP00000218104	GO Component	GO:0098588	Bounding membrane of organelle
ABCD1	9606.ENSP00000218104	GO Component	GO:0098827	Endoplasmic reticulum subcompartment
ABCD1	9606.ENSP00000218104	GO Component	GO:0098852	Lytic vacuole membrane
ABCD1	9606.ENSP00000218104	GO Component	GO:0110165	Cellular anatomical entity
ABCD1	9606.ENSP00000218104	STRING clusters	CL:8736	Mixed, incl. Fatty acid beta-oxidation, and AMP-binding, conserved site
ABCD1	9606.ENSP00000218104	STRING clusters	CL:8737	Mixed, incl. Fatty acid beta-oxidation, and Fatty acid biosynthesis
ABCD1	9606.ENSP00000218104	STRING clusters	CL:8898	arachidonate-CoA ligase activity, and Adrenoleukodystrophy
ABCD1	9606.ENSP00000218104	STRING clusters	CL:8899	Very long-chain fatty acid catabolic process, and Ovarian follicle atresia
ABCD1	9606.ENSP00000218104	KEGG	hsa02010	ABC transporters
ABCD1	9606.ENSP00000218104	KEGG	hsa04146	Peroxisome
ABCD1	9606.ENSP00000218104	Reactome	HSA-1369062	ABC transporters in lipid homeostasis
ABCD1	9606.ENSP00000218104	Reactome	HSA-1430728	Metabolism
ABCD1	9606.ENSP00000218104	Reactome	HSA-1643685	Disease
ABCD1	9606.ENSP00000218104	Reactome	HSA-2046104	Alpha-linolenic (omega3) and linoleic (omega6) acid metabolism
ABCD1	9606.ENSP00000218104	Reactome	HSA-2046105	Linoleic acid (LA) metabolism
ABCD1	9606.ENSP00000218104	Reactome	HSA-2046106	Alpha-linolenic acid (ALA) metabolism
ABCD1	9606.ENSP00000218104	Reactome	HSA-382551	Transport of small molecules
ABCD1	9606.ENSP00000218104	Reactome	HSA-382556	ABC-family proteins mediated transport
ABCD1	9606.ENSP00000218104	Reactome	HSA-390247	Beta-oxidation of very long chain fatty acids
ABCD1	9606.ENSP00000218104	Reactome	HSA-390918	Peroxisomal lipid metabolism
ABCD1	9606.ENSP00000218104	Reactome	HSA-556833	Metabolism of lipids
ABCD1	9606.ENSP00000218104	Reactome	HSA-5619084	ABC transporter disorders
ABCD1	9606.ENSP00000218104	Reactome	HSA-5619115	Disorders of transmembrane transporters
ABCD1	9606.ENSP00000218104	Reactome	HSA-5684045	Defective ABCD1 causes ALD
ABCD1	9606.ENSP00000218104	Reactome	HSA-8978868	Fatty acid metabolism
ABCD1	9606.ENSP00000218104	Reactome	HSA-9603798	Class I peroxisomal membrane protein import
ABCD1	9606.ENSP00000218104	Reactome	HSA-9609507	Protein localization
ABCD1	9606.ENSP00000218104	WikiPathways	WP2877	Vitamin D receptor pathway
ABCD1	9606.ENSP00000218104	WikiPathways	WP5323	Fatty Acids and Lipoproteins Transport in Hepatocytes
ABCD1	9606.ENSP00000218104	DISEASES	DOID:0050177	Monogenic disease
ABCD1	9606.ENSP00000218104	DISEASES	DOID:0050735	X-linked monogenic disease
ABCD1	9606.ENSP00000218104	DISEASES	DOID:0080012	X-linked recessive disease
ABCD1	9606.ENSP00000218104	DISEASES	DOID:10579	Leukodystrophy
ABCD1	9606.ENSP00000218104	DISEASES	DOID:10588	Adrenoleukodystrophy
ABCD1	9606.ENSP00000218104	DISEASES	DOID:1443	Cerebral degeneration
ABCD1	9606.ENSP00000218104	DISEASES	DOID:331	Central nervous system disease
ABCD1	9606.ENSP00000218104	DISEASES	DOID:4	Disease
ABCD1	9606.ENSP00000218104	DISEASES	DOID:630	Genetic disease
ABCD1	9606.ENSP00000218104	DISEASES	DOID:7	Disease of anatomical entity
ABCD1	9606.ENSP00000218104	DISEASES	DOID:863	Nervous system disease
ABCD1	9606.ENSP00000218104	DISEASES	DOID:936	Brain disease
ABCD1	9606.ENSP00000218104	TISSUES	BTO:0000000	Tissues, cell types and enzyme sources
ABCD1	9606.ENSP00000218104	TISSUES	BTO:0000042	Animal
ABCD1	9606.ENSP00000218104	TISSUES	BTO:0000345	Digestive gland
ABCD1	9606.ENSP00000218104	TISSUES	BTO:0000522	Gland
ABCD1	9606.ENSP00000218104	TISSUES	BTO:0000988	Pancreas
ABCD1	9606.ENSP00000218104	TISSUES	BTO:0001488	Endocrine gland
ABCD1	9606.ENSP00000218104	TISSUES	BTO:0001489	Whole body
ABCD1	9606.ENSP00000218104	TISSUES	BTO:0001491	Viscus
ABCD1	9606.ENSP00000218104	COMPARTMENTS	GOCC:0000323	Lytic vacuole
ABCD1	9606.ENSP00000218104	COMPARTMENTS	GOCC:0005622	Intracellular
ABCD1	9606.ENSP00000218104	COMPARTMENTS	GOCC:0005737	Cytoplasm
ABCD1	9606.ENSP00000218104	COMPARTMENTS	GOCC:0005739	Mitochondrion
ABCD1	9606.ENSP00000218104	COMPARTMENTS	GOCC:0005740	Mitochondrial envelope
ABCD1	9606.ENSP00000218104	COMPARTMENTS	GOCC:0005764	Lysosome
ABCD1	9606.ENSP00000218104	COMPARTMENTS	GOCC:0005765	Lysosomal membrane
ABCD1	9606.ENSP00000218104	COMPARTMENTS	GOCC:0005773	Vacuole
ABCD1	9606.ENSP00000218104	COMPARTMENTS	GOCC:0005774	Vacuolar membrane
ABCD1	9606.ENSP00000218104	COMPARTMENTS	GOCC:0005777	Peroxisome
ABCD1	9606.ENSP00000218104	COMPARTMENTS	GOCC:0005778	Peroxisomal membrane
ABCD1	9606.ENSP00000218104	COMPARTMENTS	GOCC:0005779	Integral component of peroxisomal membrane
ABCD1	9606.ENSP00000218104	COMPARTMENTS	GOCC:0005783	Endoplasmic reticulum
ABCD1	9606.ENSP00000218104	COMPARTMENTS	GOCC:0005789	Endoplasmic reticulum membrane
ABCD1	9606.ENSP00000218104	COMPARTMENTS	GOCC:0012505	Endomembrane system
ABCD1	9606.ENSP00000218104	COMPARTMENTS	GOCC:0016020	Membrane
ABCD1	9606.ENSP00000218104	COMPARTMENTS	GOCC:0016021	Integral component of membrane
ABCD1	9606.ENSP00000218104	COMPARTMENTS	GOCC:0031090	Organelle membrane
ABCD1	9606.ENSP00000218104	COMPARTMENTS	GOCC:0031224	Intrinsic component of membrane
ABCD1	9606.ENSP00000218104	COMPARTMENTS	GOCC:0031231	Intrinsic component of peroxisomal membrane
ABCD1	9606.ENSP00000218104	COMPARTMENTS	GOCC:0031300	Intrinsic component of organelle membrane
ABCD1	9606.ENSP00000218104	COMPARTMENTS	GOCC:0031301	Integral component of organelle membrane
ABCD1	9606.ENSP00000218104	COMPARTMENTS	GOCC:0031903	Microbody membrane
ABCD1	9606.ENSP00000218104	COMPARTMENTS	GOCC:0031966	Mitochondrial membrane
ABCD1	9606.ENSP00000218104	COMPARTMENTS	GOCC:0031967	Organelle envelope
ABCD1	9606.ENSP00000218104	COMPARTMENTS	GOCC:0031975	Envelope
ABCD1	9606.ENSP00000218104	COMPARTMENTS	GOCC:0031984	Organelle subcompartment
ABCD1	9606.ENSP00000218104	COMPARTMENTS	GOCC:0042175	Nuclear outer membrane-endoplasmic reticulum membrane network
ABCD1	9606.ENSP00000218104	COMPARTMENTS	GOCC:0042579	Microbody
ABCD1	9606.ENSP00000218104	COMPARTMENTS	GOCC:0043226	Organelle
ABCD1	9606.ENSP00000218104	COMPARTMENTS	GOCC:0043227	Membrane-bounded organelle
ABCD1	9606.ENSP00000218104	COMPARTMENTS	GOCC:0043229	Intracellular organelle
ABCD1	9606.ENSP00000218104	COMPARTMENTS	GOCC:0043231	Intracellular membrane-bounded organelle
ABCD1	9606.ENSP00000218104	COMPARTMENTS	GOCC:0048471	Perinuclear region of cytoplasm
ABCD1	9606.ENSP00000218104	COMPARTMENTS	GOCC:0098588	Bounding membrane of organelle
ABCD1	9606.ENSP00000218104	COMPARTMENTS	GOCC:0098827	Endoplasmic reticulum subcompartment
ABCD1	9606.ENSP00000218104	COMPARTMENTS	GOCC:0098852	Lytic vacuole membrane
ABCD1	9606.ENSP00000218104	COMPARTMENTS	GOCC:0110165	Cellular anatomical entity
ABCD1	9606.ENSP00000218104	Monarch	EFO:0000408	Disease
ABCD1	9606.ENSP00000218104	Monarch	EFO:0003765	Sign or symptom
ABCD1	9606.ENSP00000218104	Monarch	EFO:0003843	Pain
ABCD1	9606.ENSP00000218104	Monarch	EFO:0009690	Urinary system disease
ABCD1	9606.ENSP00000218104	Monarch	EFO:1000018	Bladder disease
ABCD1	9606.ENSP00000218104	Monarch	HP:0000002	Abnormality of body height
ABCD1	9606.ENSP00000218104	Monarch	HP:0000009	Functional abnormality of the bladder
ABCD1	9606.ENSP00000218104	Monarch	HP:0000011	Neurogenic bladder
ABCD1	9606.ENSP00000218104	Monarch	HP:0000012	Urinary urgency
ABCD1	9606.ENSP00000218104	Monarch	HP:0000014	Abnormality of the bladder
ABCD1	9606.ENSP00000218104	Monarch	HP:0000016	Urinary retention
ABCD1	9606.ENSP00000218104	Monarch	HP:0000020	Urinary incontinence
ABCD1	9606.ENSP00000218104	Monarch	HP:0000025	Functional abnormality of male internal genitalia
ABCD1	9606.ENSP00000218104	Monarch	HP:0000026	Male hypogonadism
ABCD1	9606.ENSP00000218104	Monarch	HP:0000078	Abnormality of the genital system
ABCD1	9606.ENSP00000218104	Monarch	HP:0000079	Abnormality of the urinary system
ABCD1	9606.ENSP00000218104	Monarch	HP:0000080	Abnormality of reproductive system physiology
ABCD1	9606.ENSP00000218104	Monarch	HP:0000118	Phenotypic abnormality
ABCD1	9606.ENSP00000218104	Monarch	HP:0000119	Abnormality of the genitourinary system
ABCD1	9606.ENSP00000218104	Monarch	HP:0000135	Hypogonadism
ABCD1	9606.ENSP00000218104	Monarch	HP:0000152	Abnormality of head or neck
ABCD1	9606.ENSP00000218104	Monarch	HP:0000153	Abnormality of the mouth
ABCD1	9606.ENSP00000218104	Monarch	HP:0000159	Abnormal lip morphology
ABCD1	9606.ENSP00000218104	Monarch	HP:0000163	Abnormal oral cavity morphology
ABCD1	9606.ENSP00000218104	Monarch	HP:0000234	Abnormality of the head
ABCD1	9606.ENSP00000218104	Monarch	HP:0000271	Abnormality of the face
ABCD1	9606.ENSP00000218104	Monarch	HP:0000301	Abnormality of facial musculature
ABCD1	9606.ENSP00000218104	Monarch	HP:0000317	Facial myokymia
ABCD1	9606.ENSP00000218104	Monarch	HP:0000364	Hearing abnormality
ABCD1	9606.ENSP00000218104	Monarch	HP:0000365	Hearing impairment
ABCD1	9606.ENSP00000218104	Monarch	HP:0000407	Sensorineural hearing impairment
ABCD1	9606.ENSP00000218104	Monarch	HP:0000478	Abnormality of the eye
ABCD1	9606.ENSP00000218104	Monarch	HP:0000496	Abnormality of eye movement
ABCD1	9606.ENSP00000218104	Monarch	HP:0000504	Abnormality of vision
ABCD1	9606.ENSP00000218104	Monarch	HP:0000505	Visual impairment
ABCD1	9606.ENSP00000218104	Monarch	HP:0000572	Visual loss
ABCD1	9606.ENSP00000218104	Monarch	HP:0000598	Abnormality of the ear
ABCD1	9606.ENSP00000218104	Monarch	HP:0000618	Blindness
ABCD1	9606.ENSP00000218104	Monarch	HP:0000651	Diplopia
ABCD1	9606.ENSP00000218104	Monarch	HP:0000657	Oculomotor apraxia
ABCD1	9606.ENSP00000218104	Monarch	HP:0000707	Abnormality of the nervous system
ABCD1	9606.ENSP00000218104	Monarch	HP:0000708	Behavioral abnormality
ABCD1	9606.ENSP00000218104	Monarch	HP:0000709	Psychosis
ABCD1	9606.ENSP00000218104	Monarch	HP:0000718	Aggressive behavior
ABCD1	9606.ENSP00000218104	Monarch	HP:0000719	Inappropriate behavior
ABCD1	9606.ENSP00000218104	Monarch	HP:0000726	Dementia
ABCD1	9606.ENSP00000218104	Monarch	HP:0000734	Disinhibition
ABCD1	9606.ENSP00000218104	Monarch	HP:0000736	Short attention span
ABCD1	9606.ENSP00000218104	Monarch	HP:0000752	Hyperactivity
ABCD1	9606.ENSP00000218104	Monarch	HP:0000759	Abnormal peripheral nervous system morphology
ABCD1	9606.ENSP00000218104	Monarch	HP:0000764	Peripheral axonal degeneration
ABCD1	9606.ENSP00000218104	Monarch	HP:0000802	Impotence
ABCD1	9606.ENSP00000218104	Monarch	HP:0000818	Abnormality of the endocrine system
ABCD1	9606.ENSP00000218104	Monarch	HP:0000820	Abnormality of the thyroid gland
ABCD1	9606.ENSP00000218104	Monarch	HP:0000834	Abnormality of the adrenal glands
ABCD1	9606.ENSP00000218104	Monarch	HP:0000846	Adrenal insufficiency
ABCD1	9606.ENSP00000218104	Monarch	HP:0000849	Adrenocortical abnormality
ABCD1	9606.ENSP00000218104	Monarch	HP:0000864	Abnormality of the hypothalamus-pituitary axis
ABCD1	9606.ENSP00000218104	Monarch	HP:0000924	Abnormality of the skeletal system
ABCD1	9606.ENSP00000218104	Monarch	HP:0000925	Abnormality of the vertebral column
ABCD1	9606.ENSP00000218104	Monarch	HP:0000951	Abnormality of the skin
ABCD1	9606.ENSP00000218104	Monarch	HP:0000953	Hyperpigmentation of the skin
ABCD1	9606.ENSP00000218104	Monarch	HP:0001000	Abnormality of skin pigmentation
ABCD1	9606.ENSP00000218104	Monarch	HP:0001123	Visual field defect
ABCD1	9606.ENSP00000218104	Monarch	HP:0001155	Abnormality of the hand
ABCD1	9606.ENSP00000218104	Monarch	HP:0001167	Abnormality of finger
[truncated: 177,156 more rows]

## Sheet: MAPK_pathway
Column1	Column2	Column3	Column4	Column5
X.node	identifier	category	term.ID	term.description
CHUK	9606.ENSP00000359424	KEGG	hsa04010	MAPK signaling pathway
CHUK	9606.ENSP00000359424	WikiPathways	WP382	MAPK signaling pathway
CHUK	9606.ENSP00000359424	WikiPathways	WP3849	MAPK and NFkB signaling pathways inhibited by Yersinia YopJ
DUSP9	9606.ENSP00000345853	STRING clusters	CL:18395	Mixed, incl. Basic-leucine zipper domain, and MAPK signaling pathway
DUSP9	9606.ENSP00000345853	STRING clusters	CL:18396	Mixed, incl. Basic-leucine zipper domain, and MAPK signaling pathway
DUSP9	9606.ENSP00000345853	KEGG	hsa04010	MAPK signaling pathway
DUSP9	9606.ENSP00000345853	Reactome	HSA-5675221	Negative regulation of MAPK pathway
DUSP9	9606.ENSP00000345853	WikiPathways	WP382	MAPK signaling pathway
ECSIT	9606.ENSP00000270517	KEGG	hsa04010	MAPK signaling pathway
ECSIT	9606.ENSP00000270517	WikiPathways	WP382	MAPK signaling pathway
ERBB2	9606.ENSP00000269571	KEGG	hsa04010	MAPK signaling pathway
EVI5L	9606.ENSP00000445905	STRING clusters	CL:18395	Mixed, incl. Basic-leucine zipper domain, and MAPK signaling pathway
EVI5L	9606.ENSP00000445905	STRING clusters	CL:18396	Mixed, incl. Basic-leucine zipper domain, and MAPK signaling pathway
IKBKB	9606.ENSP00000430684	KEGG	hsa04010	MAPK signaling pathway
IKBKB	9606.ENSP00000430684	WikiPathways	WP382	MAPK signaling pathway
IKBKB	9606.ENSP00000430684	WikiPathways	WP3849	MAPK and NFkB signaling pathways inhibited by Yersinia YopJ
MAP2K7	9606.ENSP00000381070	STRING clusters	CL:18395	Mixed, incl. Basic-leucine zipper domain, and MAPK signaling pathway
MAP2K7	9606.ENSP00000381070	STRING clusters	CL:18396	Mixed, incl. Basic-leucine zipper domain, and MAPK signaling pathway
MAP2K7	9606.ENSP00000381070	KEGG	hsa04010	MAPK signaling pathway
MAP2K7	9606.ENSP00000381070	WikiPathways	WP382	MAPK signaling pathway
MAP3K7	9606.ENSP00000358335	KEGG	hsa04010	MAPK signaling pathway
MAP3K7	9606.ENSP00000358335	WikiPathways	WP382	MAPK signaling pathway
MAP3K7	9606.ENSP00000358335	WikiPathways	WP400	p38 MAPK signaling pathway
NRAS	9606.ENSP00000358548	STRING clusters	CL:17676	Negative feedback regulation of MAPK pathway, and RAS GTPase cycle mutants
NRAS	9606.ENSP00000358548	KEGG	hsa04010	MAPK signaling pathway
NRAS	9606.ENSP00000358548	Reactome	HSA-5675221	Negative regulation of MAPK pathway
NRAS	9606.ENSP00000358548	Reactome	HSA-881907	Gastrin-CREB signalling pathway via PKC and MAPK
NRAS	9606.ENSP00000358548	WikiPathways	WP382	MAPK signaling pathway
PRKACB	9606.ENSP00000359719	KEGG	hsa04010	MAPK signaling pathway
PRKACB	9606.ENSP00000359719	WikiPathways	WP382	MAPK signaling pathway
RIPK1	9606.ENSP00000259808	WikiPathways	WP400	p38 MAPK signaling pathway
RRAS2	9606.ENSP00000256196	KEGG	hsa04010	MAPK signaling pathway
RRAS2	9606.ENSP00000256196	WikiPathways	WP382	MAPK signaling pathway
STK3	9606.ENSP00000429744	KEGG	hsa04010	MAPK signaling pathway
STK3	9606.ENSP00000429744	WikiPathways	WP382	MAPK signaling pathway

## Sheet: JNK
Column1	Column2	Column3	Column4	Column5
X.node	identifier	category	term.ID	term.description
APP	9606.ENSP00000284981	GO Process	GO:0046328	Regulation of JNK cascade
APP	9606.ENSP00000284981	GO Process	GO:0046330	Positive regulation of JNK cascade
DUSP9	9606.ENSP00000345853	GO Process	GO:0007254	JNK cascade
HDAC3	9606.ENSP00000302967	GO Process	GO:0046328	Regulation of JNK cascade
HDAC3	9606.ENSP00000302967	GO Process	GO:0046329	Negative regulation of JNK cascade
MAP2K7	9606.ENSP00000381070	GO Process	GO:0007254	JNK cascade
MAP2K7	9606.ENSP00000381070	GO Process	GO:0046328	Regulation of JNK cascade
MAP2K7	9606.ENSP00000381070	GO Process	GO:0046330	Positive regulation of JNK cascade
MAP2K7	9606.ENSP00000381070	STRING clusters	CL:18468	JNK-interacting protein 1, and JUN kinase kinase activity
MAP2K7	9606.ENSP00000381070	Reactome	HSA-450321	JNK (c-Jun kinases) phosphorylation and activation mediated by activated human TAK1
MAP3K7	9606.ENSP00000358335	GO Process	GO:0007254	JNK cascade
MAP3K7	9606.ENSP00000358335	Reactome	HSA-450321	JNK (c-Jun kinases) phosphorylation and activation mediated by activated human TAK1
MEN1	9606.ENSP00000337088	GO Process	GO:0046328	Regulation of JNK cascade
MEN1	9606.ENSP00000337088	GO Process	GO:0046329	Negative regulation of JNK cascade
PJA2	9606.ENSP00000354775	GO Process	GO:0046328	Regulation of JNK cascade
PJA2	9606.ENSP00000354775	GO Process	GO:0046330	Positive regulation of JNK cascade
RIPK1	9606.ENSP00000259808	GO Process	GO:0046328	Regulation of JNK cascade
RIPK1	9606.ENSP00000259808	GO Process	GO:0046330	Positive regulation of JNK cascade
STK3	9606.ENSP00000429744	GO Process	GO:0007254	JNK cascade
STK3	9606.ENSP00000429744	GO Process	GO:0046328	Regulation of JNK cascade
STK3	9606.ENSP00000429744	GO Process	GO:0046330	Positive regulation of JNK cascade
TAB3	9606.ENSP00000368215	Reactome	HSA-450321	JNK (c-Jun kinases) phosphorylation and activation mediated by activated human TAK1

## Sheet: TNF_alpha
Column1	Column2	Column3	Column4	Column5
X.node	identifier	category	term.ID	term.description
CHUK	9606.ENSP00000359424	WikiPathways	WP231	TNF-alpha signaling pathway
IKBKB	9606.ENSP00000430684	WikiPathways	WP231	TNF-alpha signaling pathway
MADD	9606.ENSP00000310933	WikiPathways	WP231	TNF-alpha signaling pathway
MAP2K7	9606.ENSP00000381070	WikiPathways	WP231	TNF-alpha signaling pathway
MAP3K7	9606.ENSP00000358335	WikiPathways	WP231	TNF-alpha signaling pathway
NRAS	9606.ENSP00000358548	WikiPathways	WP231	TNF-alpha signaling pathway
RIPK1	9606.ENSP00000259808	WikiPathways	WP231	TNF-alpha signaling pathway
TAB3	9606.ENSP00000368215	WikiPathways	WP231	TNF-alpha signaling pathway
TBK1	9606.ENSP00000329967	WikiPathways	WP231	TNF-alpha signaling pathway

## Sheet: TNF_signaling
Column1	Column2	Column3	Column4	Column5
X.node	identifier	category	term.ID	term.description
CHUK	9606.ENSP00000359424	STRING clusters	CL:16585	Mixed, incl. Novel intracellular components of RIG-I-like receptor pathway, and TNFR1-induced NFkappaB signaling pathway
CHUK	9606.ENSP00000359424	STRING clusters	CL:16586	TNFR1-induced NFkappaB signaling pathway, and TAK1-dependent IKK and NF-kappa-B activation
CHUK	9606.ENSP00000359424	STRING clusters	CL:16587	Mixed, incl. TNFR1-induced NFkappaB signaling pathway, and NF-kappa-B/Dorsal
CHUK	9606.ENSP00000359424	STRING clusters	CL:16589	TNFR1-induced NFkappaB signaling pathway
CHUK	9606.ENSP00000359424	KEGG	hsa04668	TNF signaling pathway
CHUK	9606.ENSP00000359424	Reactome	HSA-5357905	Regulation of TNFR1 signaling
CHUK	9606.ENSP00000359424	Reactome	HSA-5357956	TNFR1-induced NFkappaB signaling pathway
CHUK	9606.ENSP00000359424	Reactome	HSA-75893	TNF signaling
CHUK	9606.ENSP00000359424	WikiPathways	WP2036	TNF-related weak inducer of apoptosis (TWEAK) signaling pathway
CHUK	9606.ENSP00000359424	WikiPathways	WP231	TNF-alpha signaling pathway
IKBKB	9606.ENSP00000430684	STRING clusters	CL:16585	Mixed, incl. Novel intracellular components of RIG-I-like receptor pathway, and TNFR1-induced NFkappaB signaling pathway
IKBKB	9606.ENSP00000430684	STRING clusters	CL:16586	TNFR1-induced NFkappaB signaling pathway, and TAK1-dependent IKK and NF-kappa-B activation
IKBKB	9606.ENSP00000430684	STRING clusters	CL:16587	Mixed, incl. TNFR1-induced NFkappaB signaling pathway, and NF-kappa-B/Dorsal
IKBKB	9606.ENSP00000430684	STRING clusters	CL:16589	TNFR1-induced NFkappaB signaling pathway
IKBKB	9606.ENSP00000430684	KEGG	hsa04668	TNF signaling pathway
IKBKB	9606.ENSP00000430684	Reactome	HSA-5357905	Regulation of TNFR1 signaling
IKBKB	9606.ENSP00000430684	Reactome	HSA-5357956	TNFR1-induced NFkappaB signaling pathway
IKBKB	9606.ENSP00000430684	Reactome	HSA-75893	TNF signaling
IKBKB	9606.ENSP00000430684	WikiPathways	WP2036	TNF-related weak inducer of apoptosis (TWEAK) signaling pathway
IKBKB	9606.ENSP00000430684	WikiPathways	WP231	TNF-alpha signaling pathway
MADD	9606.ENSP00000310933	Reactome	HSA-5357905	Regulation of TNFR1 signaling
MADD	9606.ENSP00000310933	Reactome	HSA-75893	TNF signaling
MADD	9606.ENSP00000310933	WikiPathways	WP231	TNF-alpha signaling pathway
MAP2K7	9606.ENSP00000381070	KEGG	hsa04668	TNF signaling pathway
MAP2K7	9606.ENSP00000381070	WikiPathways	WP231	TNF-alpha signaling pathway
MAP3K7	9606.ENSP00000358335	STRING clusters	CL:16585	Mixed, incl. Novel intracellular components of RIG-I-like receptor pathway, and TNFR1-induced NFkappaB signaling pathway
MAP3K7	9606.ENSP00000358335	STRING clusters	CL:16586	TNFR1-induced NFkappaB signaling pathway, and TAK1-dependent IKK and NF-kappa-B activation
MAP3K7	9606.ENSP00000358335	STRING clusters	CL:16587	Mixed, incl. TNFR1-induced NFkappaB signaling pathway, and NF-kappa-B/Dorsal
MAP3K7	9606.ENSP00000358335	STRING clusters	CL:16589	TNFR1-induced NFkappaB signaling pathway
MAP3K7	9606.ENSP00000358335	STRING clusters	CL:16590	TNFR1-induced NFkappaB signaling pathway
MAP3K7	9606.ENSP00000358335	STRING clusters	CL:16591	TNFR1-induced NFkappaB signaling pathway, and Death-inducing signaling complex assembly
MAP3K7	9606.ENSP00000358335	KEGG	hsa04668	TNF signaling pathway
MAP3K7	9606.ENSP00000358335	Reactome	HSA-5357956	TNFR1-induced NFkappaB signaling pathway
MAP3K7	9606.ENSP00000358335	Reactome	HSA-75893	TNF signaling
MAP3K7	9606.ENSP00000358335	WikiPathways	WP2036	TNF-related weak inducer of apoptosis (TWEAK) signaling pathway
MAP3K7	9606.ENSP00000358335	WikiPathways	WP231	TNF-alpha signaling pathway
NLRX1	9606.ENSP00000387334	STRING clusters	CL:16585	Mixed, incl. Novel intracellular components of RIG-I-like receptor pathway, and TNFR1-induced NFkappaB signaling pathway
NRAS	9606.ENSP00000358548	WikiPathways	WP231	TNF-alpha signaling pathway
PIK3R1	9606.ENSP00000428056	KEGG	hsa04668	TNF signaling pathway
PIK3R2	9606.ENSP00000222254	KEGG	hsa04668	TNF signaling pathway
RIPK1	9606.ENSP00000259808	STRING clusters	CL:16585	Mixed, incl. Novel intracellular components of RIG-I-like receptor pathway, and TNFR1-induced NFkappaB signaling pathway
RIPK1	9606.ENSP00000259808	STRING clusters	CL:16586	TNFR1-induced NFkappaB signaling pathway, and TAK1-dependent IKK and NF-kappa-B activation
RIPK1	9606.ENSP00000259808	STRING clusters	CL:16587	Mixed, incl. TNFR1-induced NFkappaB signaling pathway, and NF-kappa-B/Dorsal
RIPK1	9606.ENSP00000259808	STRING clusters	CL:16589	TNFR1-induced NFkappaB signaling pathway
RIPK1	9606.ENSP00000259808	STRING clusters	CL:16590	TNFR1-induced NFkappaB signaling pathway
RIPK1	9606.ENSP00000259808	STRING clusters	CL:16591	TNFR1-induced NFkappaB signaling pathway, and Death-inducing signaling complex assembly
RIPK1	9606.ENSP00000259808	KEGG	hsa04668	TNF signaling pathway
RIPK1	9606.ENSP00000259808	Reactome	HSA-5357786	TNFR1-induced proapoptotic signaling
RIPK1	9606.ENSP00000259808	Reactome	HSA-5357905	Regulation of TNFR1 signaling
RIPK1	9606.ENSP00000259808	Reactome	HSA-5357956	TNFR1-induced NFkappaB signaling pathway
RIPK1	9606.ENSP00000259808	Reactome	HSA-75893	TNF signaling
RIPK1	9606.ENSP00000259808	WikiPathways	WP2036	TNF-related weak inducer of apoptosis (TWEAK) signaling pathway
RIPK1	9606.ENSP00000259808	WikiPathways	WP231	TNF-alpha signaling pathway
TAB3	9606.ENSP00000368215	STRING clusters	CL:16585	Mixed, incl. Novel intracellular components of RIG-I-like receptor pathway, and TNFR1-induced NFkappaB signaling pathway
TAB3	9606.ENSP00000368215	STRING clusters	CL:16586	TNFR1-induced NFkappaB signaling pathway, and TAK1-dependent IKK and NF-kappa-B activation
TAB3	9606.ENSP00000368215	STRING clusters	CL:16587	Mixed, incl. TNFR1-induced NFkappaB signaling pathway, and NF-kappa-B/Dorsal
TAB3	9606.ENSP00000368215	STRING clusters	CL:16589	TNFR1-induced NFkappaB signaling pathway
TAB3	9606.ENSP00000368215	STRING clusters	CL:16590	TNFR1-induced NFkappaB signaling pathway
TAB3	9606.ENSP00000368215	STRING clusters	CL:16591	TNFR1-induced NFkappaB signaling pathway, and Death-inducing signaling complex assembly
TAB3	9606.ENSP00000368215	KEGG	hsa04668	TNF signaling pathway
TAB3	9606.ENSP00000368215	Reactome	HSA-5357956	TNFR1-induced NFkappaB signaling pathway
TAB3	9606.ENSP00000368215	Reactome	HSA-75893	TNF signaling
TAB3	9606.ENSP00000368215	WikiPathways	WP231	TNF-alpha signaling pathway
TBK1	9606.ENSP00000329967	STRING clusters	CL:16585	Mixed, incl. Novel intracellular components of RIG-I-like receptor pathway, and TNFR1-induced NFkappaB signaling pathway
TBK1	9606.ENSP00000329967	Reactome	HSA-5357786	TNFR1-induced proapoptotic signaling
TBK1	9606.ENSP00000329967	Reactome	HSA-5357905	Regulation of TNFR1 signaling
TBK1	9606.ENSP00000329967	Reactome	HSA-75893	TNF signaling
TBK1	9606.ENSP00000329967	WikiPathways	WP231	TNF-alpha signaling pathway
TRIM32	9606.ENSP00000408292	STRING clusters	CL:16585	Mixed, incl. Novel intracellular components of RIG-I-like receptor pathway, and TNFR1-induced NFkappaB signaling pathway

## Sheet: Apoptosis
Column1	Column2	Column3	Column4	Column5
X.node	identifier	category	term.ID	term.description
APP	9606.ENSP00000284981	Reactome	HSA-9734009	Defective Intrinsic Pathway for Apoptosis
APP	9606.ENSP00000284981	WikiPathways	WP2864	Apoptosis-related network due to altered Notch3 in ovarian cancer
APP	9606.ENSP00000284981	UniProt Keywords	KW-0053	Apoptosis
ATM	9606.ENSP00000278616	KEGG	hsa04210	Apoptosis
BABAM2	9606.ENSP00000343412	UniProt Keywords	KW-0053	Apoptosis
BIRC6	9606.ENSP00000393596	KEGG	hsa04215	Apoptosis - multiple species
BIRC6	9606.ENSP00000393596	UniProt Keywords	KW-0053	Apoptosis
BNIP3	9606.ENSP00000357625	WikiPathways	WP1772	Apoptosis modulation and signaling
BNIP3	9606.ENSP00000357625	UniProt Keywords	KW-0053	Apoptosis
C6orf120	9606.ENSP00000346931	UniProt Keywords	KW-0053	Apoptosis
CAPN1	9606.ENSP00000431984	KEGG	hsa04210	Apoptosis
CAPN1	9606.ENSP00000431984	Reactome	HSA-9734009	Defective Intrinsic Pathway for Apoptosis
CHUK	9606.ENSP00000359424	KEGG	hsa04210	Apoptosis
CHUK	9606.ENSP00000359424	WikiPathways	WP254	Apoptosis
EI24	9606.ENSP00000278903	UniProt Keywords	KW-0053	Apoptosis
FEM1B	9606.ENSP00000307298	UniProt Keywords	KW-0053	Apoptosis
FIS1	9606.ENSP00000223136	UniProt Keywords	KW-0053	Apoptosis
GHITM	9606.ENSP00000361207	UniProt Keywords	KW-0053	Apoptosis
IKBKB	9606.ENSP00000430684	KEGG	hsa04210	Apoptosis
IKBKB	9606.ENSP00000430684	WikiPathways	WP1772	Apoptosis modulation and signaling
IKBKB	9606.ENSP00000430684	WikiPathways	WP254	Apoptosis
ITPR2	9606.ENSP00000370744	KEGG	hsa04210	Apoptosis
MADD	9606.ENSP00000310933	WikiPathways	WP1772	Apoptosis modulation and signaling
MADD	9606.ENSP00000310933	UniProt Keywords	KW-0053	Apoptosis
MAP2K7	9606.ENSP00000381070	UniProt Keywords	KW-0053	Apoptosis
MAP3K7	9606.ENSP00000358335	UniProt Keywords	KW-0053	Apoptosis
MCL1	9606.ENSP00000358022	STRING clusters	CL:16882	Apoptosis modulation and signaling, and Bcl-2-like superfamily
MCL1	9606.ENSP00000358022	STRING clusters	CL:16884	Apoptosis modulation and signaling, and Execution phase of necroptosis
MCL1	9606.ENSP00000358022	STRING clusters	CL:16886	Apoptosis modulation and signaling
MCL1	9606.ENSP00000358022	STRING clusters	CL:16888	Apoptosis - multiple species, and TRAIL signaling
MCL1	9606.ENSP00000358022	KEGG	hsa04210	Apoptosis
MCL1	9606.ENSP00000358022	WikiPathways	WP1772	Apoptosis modulation and signaling
MCL1	9606.ENSP00000358022	WikiPathways	WP254	Apoptosis
MCL1	9606.ENSP00000358022	UniProt Keywords	KW-0053	Apoptosis
MCL1	9606.ENSP00000358022	InterPro	IPR013281	Apoptosis regulator, Mcl-1
MCL1	9606.ENSP00000358022	InterPro	IPR020717	Apoptosis regulator, Bcl-2, BH1 motif, conserved site
MCL1	9606.ENSP00000358022	InterPro	IPR020726	Apoptosis regulator, Bcl-2, BH2 motif, conserved site
MCL1	9606.ENSP00000358022	InterPro	IPR020728	Apoptosis regulator, Bcl-2, BH3 motif, conserved site
MTFP1	9606.ENSP00000266263	UniProt Keywords	KW-0053	Apoptosis
MUL1	9606.ENSP00000264198	UniProt Keywords	KW-0053	Apoptosis
NDUFA13	9606.ENSP00000423673	UniProt Keywords	KW-0053	Apoptosis
NISCH	9606.ENSP00000418232	UniProt Keywords	KW-0053	Apoptosis
NME3	9606.ENSP00000219302	UniProt Keywords	KW-0053	Apoptosis
NRAS	9606.ENSP00000358548	KEGG	hsa04210	Apoptosis
OCLN	9606.ENSP00000347379	Reactome	HSA-109581	Apoptosis
OMA1	9606.ENSP00000360270	Reactome	HSA-109581	Apoptosis
OMA1	9606.ENSP00000360270	Reactome	HSA-169911	Regulation of Apoptosis
PIK3R1	9606.ENSP00000428056	KEGG	hsa04210	Apoptosis
PIK3R1	9606.ENSP00000428056	WikiPathways	WP254	Apoptosis
PIK3R2	9606.ENSP00000222254	KEGG	hsa04210	Apoptosis
PPM1F	9606.ENSP00000263212	UniProt Keywords	KW-0053	Apoptosis
PSEN1	9606.ENSP00000326366	UniProt Keywords	KW-0053	Apoptosis
PSMD10	9606.ENSP00000217958	Reactome	HSA-109581	Apoptosis
PSMD10	9606.ENSP00000217958	Reactome	HSA-169911	Regulation of Apoptosis
PSMD10	9606.ENSP00000217958	UniProt Keywords	KW-0053	Apoptosis
PSMD9	9606.ENSP00000440485	Reactome	HSA-109581	Apoptosis
PSMD9	9606.ENSP00000440485	Reactome	HSA-169911	Regulation of Apoptosis
RIPK1	9606.ENSP00000259808	KEGG	hsa04210	Apoptosis
RIPK1	9606.ENSP00000259808	Reactome	HSA-109581	Apoptosis
RIPK1	9606.ENSP00000259808	WikiPathways	WP1772	Apoptosis modulation and signaling
RIPK1	9606.ENSP00000259808	WikiPathways	WP254	Apoptosis
RIPK1	9606.ENSP00000259808	WikiPathways	WP384	Apoptosis modulation by HSP70
RIPK1	9606.ENSP00000259808	UniProt Keywords	KW-0053	Apoptosis
RMDN3	9606.ENSP00000260385	UniProt Keywords	KW-0053	Apoptosis
STEAP3	9606.ENSP00000376822	UniProt Keywords	KW-0053	Apoptosis
STK3	9606.ENSP00000429744	UniProt Keywords	KW-0053	Apoptosis
TCTN3	9606.ENSP00000483364	UniProt Keywords	KW-0053	Apoptosis
TOLLIP	9606.ENSP00000314733	WikiPathways	WP1772	Apoptosis modulation and signaling

## Sheet: cell_death
Column1	Column2	Column3	Column4	Column5
X.node	identifier	category	term.ID	term.description
AMBRA1	9606.ENSP00000431926	GO Process	GO:0010941	Regulation of cell death
AMBRA1	9606.ENSP00000431926	GO Process	GO:0043067	Regulation of programmed cell death
AMBRA1	9606.ENSP00000431926	GO Process	GO:0043069	Negative regulation of programmed cell death
AMBRA1	9606.ENSP00000431926	GO Process	GO:0060548	Negative regulation of cell death
AMBRA1	9606.ENSP00000431926	WikiPathways	WP2509	Nanoparticle triggered autophagic cell death
APP	9606.ENSP00000284981	GO Process	GO:0010941	Regulation of cell death
APP	9606.ENSP00000284981	GO Process	GO:0010942	Positive regulation of cell death
APP	9606.ENSP00000284981	GO Process	GO:0012501	Programmed cell death
APP	9606.ENSP00000284981	GO Process	GO:0043067	Regulation of programmed cell death
APP	9606.ENSP00000284981	GO Process	GO:0043068	Positive regulation of programmed cell death
APP	9606.ENSP00000284981	GO Process	GO:0060548	Negative regulation of cell death
APP	9606.ENSP00000284981	GO Process	GO:1903201	Regulation of oxidative stress-induced cell death
APP	9606.ENSP00000284981	GO Process	GO:1903209	Positive regulation of oxidative stress-induced cell death
APP	9606.ENSP00000284981	Reactome	HSA-9645723	Diseases of programmed cell death
ARL6IP5	9606.ENSP00000273258	GO Process	GO:0010941	Regulation of cell death
ARL6IP5	9606.ENSP00000273258	GO Process	GO:0010942	Positive regulation of cell death
ARL6IP5	9606.ENSP00000273258	GO Process	GO:0012501	Programmed cell death
ARL6IP5	9606.ENSP00000273258	GO Process	GO:0043067	Regulation of programmed cell death
ARL6IP5	9606.ENSP00000273258	GO Process	GO:0043068	Positive regulation of programmed cell death
ATG9A	9606.ENSP00000386710	GO Process	GO:0010939	Regulation of necrotic cell death
ATG9A	9606.ENSP00000386710	GO Process	GO:0010940	Positive regulation of necrotic cell death
ATG9A	9606.ENSP00000386710	GO Process	GO:0010941	Regulation of cell death
ATG9A	9606.ENSP00000386710	GO Process	GO:0010942	Positive regulation of cell death
ATM	9606.ENSP00000278616	GO Process	GO:0010941	Regulation of cell death
ATM	9606.ENSP00000278616	GO Process	GO:0010942	Positive regulation of cell death
ATM	9606.ENSP00000278616	GO Process	GO:0012501	Programmed cell death
ATM	9606.ENSP00000278616	GO Process	GO:0043067	Regulation of programmed cell death
ATM	9606.ENSP00000278616	GO Process	GO:0043068	Positive regulation of programmed cell death
BABAM2	9606.ENSP00000343412	GO Process	GO:0010941	Regulation of cell death
BABAM2	9606.ENSP00000343412	GO Process	GO:0012501	Programmed cell death
BABAM2	9606.ENSP00000343412	GO Process	GO:0043067	Regulation of programmed cell death
BABAM2	9606.ENSP00000343412	GO Process	GO:0043069	Negative regulation of programmed cell death
BABAM2	9606.ENSP00000343412	GO Process	GO:0060548	Negative regulation of cell death
BAG5	9606.ENSP00000338814	GO Process	GO:0010941	Regulation of cell death
BAG5	9606.ENSP00000338814	GO Process	GO:0043067	Regulation of programmed cell death
BAG5	9606.ENSP00000338814	GO Process	GO:0043069	Negative regulation of programmed cell death
BAG5	9606.ENSP00000338814	GO Process	GO:0060548	Negative regulation of cell death
BAG5	9606.ENSP00000338814	GO Process	GO:1903201	Regulation of oxidative stress-induced cell death
BAG5	9606.ENSP00000338814	GO Process	GO:1903202	Negative regulation of oxidative stress-induced cell death
BIRC6	9606.ENSP00000393596	GO Process	GO:0010941	Regulation of cell death
BIRC6	9606.ENSP00000393596	GO Process	GO:0012501	Programmed cell death
BIRC6	9606.ENSP00000393596	GO Process	GO:0043067	Regulation of programmed cell death
BIRC6	9606.ENSP00000393596	GO Process	GO:0043069	Negative regulation of programmed cell death
BIRC6	9606.ENSP00000393596	GO Process	GO:0060548	Negative regulation of cell death
BNIP3	9606.ENSP00000357625	GO Process	GO:0010939	Regulation of necrotic cell death
BNIP3	9606.ENSP00000357625	GO Process	GO:0010940	Positive regulation of necrotic cell death
BNIP3	9606.ENSP00000357625	GO Process	GO:0010941	Regulation of cell death
BNIP3	9606.ENSP00000357625	GO Process	GO:0010942	Positive regulation of cell death
BNIP3	9606.ENSP00000357625	GO Process	GO:0012501	Programmed cell death
BNIP3	9606.ENSP00000357625	GO Process	GO:0043067	Regulation of programmed cell death
BNIP3	9606.ENSP00000357625	GO Process	GO:0043068	Positive regulation of programmed cell death
BNIP3	9606.ENSP00000357625	GO Process	GO:0043069	Negative regulation of programmed cell death
BNIP3	9606.ENSP00000357625	GO Process	GO:0048102	Autophagic cell death
BNIP3	9606.ENSP00000357625	GO Process	GO:0060548	Negative regulation of cell death
BNIP3	9606.ENSP00000357625	GO Process	GO:0140507	Granzyme-mediated programmed cell death signaling pathway
BNIP3	9606.ENSP00000357625	GO Process	GO:1902686	Mitochondrial outer membrane permeabilization involved in programmed cell death
BRAT1	9606.ENSP00000339637	GO Process	GO:0012501	Programmed cell death
C6orf120	9606.ENSP00000346931	GO Process	GO:0012501	Programmed cell death
CAPN1	9606.ENSP00000431984	Reactome	HSA-9645723	Diseases of programmed cell death
CDK5RAP3	9606.ENSP00000438886	GO Process	GO:0012501	Programmed cell death
CHEK1	9606.ENSP00000391090	GO Process	GO:0012501	Programmed cell death
CHP1	9606.ENSP00000335632	GO Process	GO:0010941	Regulation of cell death
CXCR4	9606.ENSP00000386884	GO Process	GO:0010941	Regulation of cell death
CXCR4	9606.ENSP00000386884	GO Process	GO:0012501	Programmed cell death
CXCR4	9606.ENSP00000386884	GO Process	GO:0043067	Regulation of programmed cell death
CYP1B1	9606.ENSP00000478561	GO Process	GO:0010941	Regulation of cell death
CYP1B1	9606.ENSP00000478561	GO Process	GO:0010942	Positive regulation of cell death
CYP1B1	9606.ENSP00000478561	GO Process	GO:0012501	Programmed cell death
CYP1B1	9606.ENSP00000478561	GO Process	GO:0043067	Regulation of programmed cell death
CYP1B1	9606.ENSP00000478561	GO Process	GO:0043068	Positive regulation of programmed cell death
DHCR24	9606.ENSP00000360316	GO Process	GO:0010941	Regulation of cell death
DHCR24	9606.ENSP00000360316	GO Process	GO:0012501	Programmed cell death
DHCR24	9606.ENSP00000360316	GO Process	GO:0043067	Regulation of programmed cell death
DHCR24	9606.ENSP00000360316	GO Process	GO:0043069	Negative regulation of programmed cell death
DHCR24	9606.ENSP00000360316	GO Process	GO:0060548	Negative regulation of cell death
DIPK2A	9606.ENSP00000320081	GO Process	GO:0010941	Regulation of cell death
DIPK2A	9606.ENSP00000320081	GO Process	GO:0043067	Regulation of programmed cell death
DIPK2A	9606.ENSP00000320081	GO Process	GO:0043069	Negative regulation of programmed cell death
DIPK2A	9606.ENSP00000320081	GO Process	GO:0060548	Negative regulation of cell death
DUSP9	9606.ENSP00000345853	GO Process	GO:0010941	Regulation of cell death
DUSP9	9606.ENSP00000345853	GO Process	GO:0010942	Positive regulation of cell death
DUSP9	9606.ENSP00000345853	GO Process	GO:0043067	Regulation of programmed cell death
DUSP9	9606.ENSP00000345853	GO Process	GO:0043068	Positive regulation of programmed cell death
EI24	9606.ENSP00000278903	GO Process	GO:0012501	Programmed cell death
EIF2B5	9606.ENSP00000497160	GO Process	GO:0010941	Regulation of cell death
EIF2B5	9606.ENSP00000497160	GO Process	GO:0010942	Positive regulation of cell death
EIF2B5	9606.ENSP00000497160	GO Process	GO:0043067	Regulation of programmed cell death
EIF2B5	9606.ENSP00000497160	GO Process	GO:0043068	Positive regulation of programmed cell death
ERCC2	9606.ENSP00000375809	GO Process	GO:0012501	Programmed cell death
EXOC5	9606.ENSP00000484855	GO Process	GO:0012501	Programmed cell death
FASTKD2	9606.ENSP00000385990	GO Process	GO:0012501	Programmed cell death
FEM1B	9606.ENSP00000307298	GO Process	GO:0010941	Regulation of cell death
FEM1B	9606.ENSP00000307298	GO Process	GO:0012501	Programmed cell death
FEM1B	9606.ENSP00000307298	GO Process	GO:0043067	Regulation of programmed cell death
FIS1	9606.ENSP00000223136	GO Process	GO:0010941	Regulation of cell death
FIS1	9606.ENSP00000223136	GO Process	GO:0010942	Positive regulation of cell death
FIS1	9606.ENSP00000223136	GO Process	GO:0012501	Programmed cell death
FIS1	9606.ENSP00000223136	GO Process	GO:0043067	Regulation of programmed cell death
FIS1	9606.ENSP00000223136	GO Process	GO:0043068	Positive regulation of programmed cell death
GCLM	9606.ENSP00000359258	GO Process	GO:0010941	Regulation of cell death
GCLM	9606.ENSP00000359258	GO Process	GO:0012501	Programmed cell death
GCLM	9606.ENSP00000359258	GO Process	GO:0043067	Regulation of programmed cell death
GCLM	9606.ENSP00000359258	GO Process	GO:0043069	Negative regulation of programmed cell death
GCLM	9606.ENSP00000359258	GO Process	GO:0060548	Negative regulation of cell death
GHITM	9606.ENSP00000361207	GO Process	GO:0010941	Regulation of cell death
GHITM	9606.ENSP00000361207	GO Process	GO:0012501	Programmed cell death
GHITM	9606.ENSP00000361207	GO Process	GO:0043067	Regulation of programmed cell death
GHITM	9606.ENSP00000361207	GO Process	GO:0043069	Negative regulation of programmed cell death
GHITM	9606.ENSP00000361207	GO Process	GO:0060548	Negative regulation of cell death
HDAC3	9606.ENSP00000302967	GO Process	GO:0010941	Regulation of cell death
HDAC3	9606.ENSP00000302967	GO Process	GO:0043067	Regulation of programmed cell death
HDAC3	9606.ENSP00000302967	GO Process	GO:0043069	Negative regulation of programmed cell death
HDAC3	9606.ENSP00000302967	GO Process	GO:0060548	Negative regulation of cell death
IGF2R	9606.ENSP00000349437	GO Process	GO:0010941	Regulation of cell death
IGF2R	9606.ENSP00000349437	GO Process	GO:0010942	Positive regulation of cell death
IGF2R	9606.ENSP00000349437	GO Process	GO:0043067	Regulation of programmed cell death
IGF2R	9606.ENSP00000349437	GO Process	GO:0043068	Positive regulation of programmed cell death
INTS1	9606.ENSP00000385722	GO Process	GO:0010941	Regulation of cell death
INTS1	9606.ENSP00000385722	GO Process	GO:0043067	Regulation of programmed cell death
INTS1	9606.ENSP00000385722	GO Process	GO:0043069	Negative regulation of programmed cell death
INTS1	9606.ENSP00000385722	GO Process	GO:0060548	Negative regulation of cell death
ITPRIP	9606.ENSP00000278071	GO Process	GO:0010941	Regulation of cell death
ITPRIP	9606.ENSP00000278071	GO Process	GO:0012501	Programmed cell death
ITPRIP	9606.ENSP00000278071	GO Process	GO:0043067	Regulation of programmed cell death
ITPRIP	9606.ENSP00000278071	GO Process	GO:0043069	Negative regulation of programmed cell death
ITPRIP	9606.ENSP00000278071	GO Process	GO:0060548	Negative regulation of cell death
LGMN	9606.ENSP00000376911	GO Process	GO:0010941	Regulation of cell death
LGMN	9606.ENSP00000376911	GO Process	GO:0043067	Regulation of programmed cell death
LGMN	9606.ENSP00000376911	GO Process	GO:0043069	Negative regulation of programmed cell death
LGMN	9606.ENSP00000376911	GO Process	GO:0060548	Negative regulation of cell death
MADD	9606.ENSP00000310933	GO Process	GO:0010941	Regulation of cell death
MADD	9606.ENSP00000310933	GO Process	GO:0012501	Programmed cell death
MADD	9606.ENSP00000310933	GO Process	GO:0043067	Regulation of programmed cell death
MAP2K7	9606.ENSP00000381070	GO Process	GO:0010941	Regulation of cell death
MAP2K7	9606.ENSP00000381070	GO Process	GO:0010942	Positive regulation of cell death
MAP2K7	9606.ENSP00000381070	GO Process	GO:0012501	Programmed cell death
MAP2K7	9606.ENSP00000381070	GO Process	GO:0043067	Regulation of programmed cell death
MAP2K7	9606.ENSP00000381070	GO Process	GO:0043068	Positive regulation of programmed cell death
MAP3K7	9606.ENSP00000358335	GO Process	GO:0012501	Programmed cell death
MAPKAP1	9606.ENSP00000265960	GO Process	GO:0010941	Regulation of cell death
MAPKAP1	9606.ENSP00000265960	GO Process	GO:0043067	Regulation of programmed cell death
MAPKAP1	9606.ENSP00000265960	GO Process	GO:0043069	Negative regulation of programmed cell death
MAPKAP1	9606.ENSP00000265960	GO Process	GO:0060548	Negative regulation of cell death
MCL1	9606.ENSP00000358022	GO Process	GO:0010941	Regulation of cell death
MCL1	9606.ENSP00000358022	GO Process	GO:0010942	Positive regulation of cell death
MCL1	9606.ENSP00000358022	GO Process	GO:0012501	Programmed cell death
MCL1	9606.ENSP00000358022	GO Process	GO:0043067	Regulation of programmed cell death
MCL1	9606.ENSP00000358022	GO Process	GO:0043068	Positive regulation of programmed cell death
MCL1	9606.ENSP00000358022	GO Process	GO:0043069	Negative regulation of programmed cell death
MCL1	9606.ENSP00000358022	GO Process	GO:0060548	Negative regulation of cell death
MCL1	9606.ENSP00000358022	GO Process	GO:1903201	Regulation of oxidative stress-induced cell death
MCL1	9606.ENSP00000358022	GO Process	GO:1903209	Positive regulation of oxidative stress-induced cell death
MLST8	9606.ENSP00000457870	GO Process	GO:0010941	Regulation of cell death
MLST8	9606.ENSP00000457870	GO Process	GO:0043067	Regulation of programmed cell death
MLST8	9606.ENSP00000457870	GO Process	GO:0043069	Negative regulation of programmed cell death
MLST8	9606.ENSP00000457870	GO Process	GO:0060548	Negative regulation of cell death
MTFP1	9606.ENSP00000266263	GO Process	GO:0012501	Programmed cell death
MTOR	9606.ENSP00000354558	GO Process	GO:0010941	Regulation of cell death
MTOR	9606.ENSP00000354558	GO Process	GO:0012501	Programmed cell death
MTOR	9606.ENSP00000354558	GO Process	GO:0043067	Regulation of programmed cell death
MTOR	9606.ENSP00000354558	GO Process	GO:0043069	Negative regulation of programmed cell death
MTOR	9606.ENSP00000354558	GO Process	GO:0060548	Negative regulation of cell death
MUL1	9606.ENSP00000264198	GO Process	GO:0012501	Programmed cell death
NCSTN	9606.ENSP00000294785	GO Process	GO:0012501	Programmed cell death
NCSTN	9606.ENSP00000294785	Reactome	HSA-205043	NRIF signals cell death from the nucleus
NDUFA13	9606.ENSP00000423673	GO Process	GO:0010941	Regulation of cell death
NDUFA13	9606.ENSP00000423673	GO Process	GO:0012501	Programmed cell death
NDUFA13	9606.ENSP00000423673	GO Process	GO:0043067	Regulation of programmed cell death
NDUFA13	9606.ENSP00000423673	GO Process	GO:0043069	Negative regulation of programmed cell death
NDUFA13	9606.ENSP00000423673	GO Process	GO:0060548	Negative regulation of cell death
NDUFAF4	9606.ENSP00000358272	GO Process	GO:0010941	Regulation of cell death
NDUFAF4	9606.ENSP00000358272	GO Process	GO:0043067	Regulation of programmed cell death
NDUFAF4	9606.ENSP00000358272	GO Process	GO:0043069	Negative regulation of programmed cell death
NDUFAF4	9606.ENSP00000358272	GO Process	GO:0060548	Negative regulation of cell death
NISCH	9606.ENSP00000418232	GO Process	GO:0012501	Programmed cell death
NME3	9606.ENSP00000219302	GO Process	GO:0012501	Programmed cell death
NOTCH2	9606.ENSP00000256646	GO Process	GO:0010941	Regulation of cell death
NOTCH2	9606.ENSP00000256646	GO Process	GO:0010942	Positive regulation of cell death
NOTCH2	9606.ENSP00000256646	GO Process	GO:0012501	Programmed cell death
NOTCH2	9606.ENSP00000256646	GO Process	GO:0043067	Regulation of programmed cell death
NOTCH2	9606.ENSP00000256646	GO Process	GO:0043068	Positive regulation of programmed cell death
NOTCH2	9606.ENSP00000256646	GO Process	GO:0043069	Negative regulation of programmed cell death
NOTCH2	9606.ENSP00000256646	GO Process	GO:0060548	Negative regulation of cell death
NPC1	9606.ENSP00000269228	GO Process	GO:0010941	Regulation of cell death
NPC1	9606.ENSP00000269228	GO Process	GO:0060548	Negative regulation of cell death
OMA1	9606.ENSP00000360270	GO Process	GO:0010941	Regulation of cell death
OMA1	9606.ENSP00000360270	GO Process	GO:0010942	Positive regulation of cell death
OMA1	9606.ENSP00000360270	GO Process	GO:0043067	Regulation of programmed cell death
OMA1	9606.ENSP00000360270	GO Process	GO:0043068	Positive regulation of programmed cell death
PARL	9606.ENSP00000325421	GO Process	GO:0010941	Regulation of cell death
PARL	9606.ENSP00000325421	GO Process	GO:0043067	Regulation of programmed cell death
PARL	9606.ENSP00000325421	GO Process	GO:0043069	Negative regulation of programmed cell death
PARL	9606.ENSP00000325421	GO Process	GO:0060548	Negative regulation of cell death
PDK1	9606.ENSP00000376352	GO Process	GO:0012501	Programmed cell death
PIGT	9606.ENSP00000279036	GO Process	GO:0012501	Programmed cell death
PIK3R1	9606.ENSP00000428056	GO Process	GO:0010941	Regulation of cell death
PIK3R1	9606.ENSP00000428056	GO Process	GO:0012501	Programmed cell death
PIK3R1	9606.ENSP00000428056	GO Process	GO:0043067	Regulation of programmed cell death
PIK3R1	9606.ENSP00000428056	GO Process	GO:0043069	Negative regulation of programmed cell death
PIK3R1	9606.ENSP00000428056	GO Process	GO:0060548	Negative regulation of cell death
POR	9606.ENSP00000419970	GO Process	GO:0010941	Regulation of cell death
POR	9606.ENSP00000419970	GO Process	GO:0043067	Regulation of programmed cell death
POR	9606.ENSP00000419970	GO Process	GO:0043069	Negative regulation of programmed cell death
POR	9606.ENSP00000419970	GO Process	GO:0060548	Negative regulation of cell death
PPM1F	9606.ENSP00000263212	GO Process	GO:0012501	Programmed cell death
PRKAA1	9606.ENSP00000346148	GO Process	GO:0010941	Regulation of cell death
PRKAA1	9606.ENSP00000346148	GO Process	GO:0043067	Regulation of programmed cell death
PRKAA1	9606.ENSP00000346148	GO Process	GO:0043069	Negative regulation of programmed cell death
PRKAA1	9606.ENSP00000346148	GO Process	GO:0060548	Negative regulation of cell death
PSEN1	9606.ENSP00000326366	GO Process	GO:0010941	Regulation of cell death
PSEN1	9606.ENSP00000326366	GO Process	GO:0010942	Positive regulation of cell death
PSEN1	9606.ENSP00000326366	GO Process	GO:0012501	Programmed cell death
PSEN1	9606.ENSP00000326366	GO Process	GO:0043067	Regulation of programmed cell death
PSEN1	9606.ENSP00000326366	GO Process	GO:0043068	Positive regulation of programmed cell death
PSEN1	9606.ENSP00000326366	GO Process	GO:0043069	Negative regulation of programmed cell death
PSEN1	9606.ENSP00000326366	GO Process	GO:0060548	Negative regulation of cell death
PSEN1	9606.ENSP00000326366	Reactome	HSA-205043	NRIF signals cell death from the nucleus
PSEN2	9606.ENSP00000355747	GO Process	GO:0010941	Regulation of cell death
PSEN2	9606.ENSP00000355747	GO Process	GO:0043067	Regulation of programmed cell death
PSEN2	9606.ENSP00000355747	GO Process	GO:0043069	Negative regulation of programmed cell death
PSEN2	9606.ENSP00000355747	GO Process	GO:0060548	Negative regulation of cell death
PSEN2	9606.ENSP00000355747	Reactome	HSA-205043	NRIF signals cell death from the nucleus
PSMD10	9606.ENSP00000217958	GO Process	GO:0010941	Regulation of cell death
PSMD10	9606.ENSP00000217958	GO Process	GO:0012501	Programmed cell death
PSMD10	9606.ENSP00000217958	GO Process	GO:0043067	Regulation of programmed cell death
PSMD10	9606.ENSP00000217958	GO Process	GO:0043069	Negative regulation of programmed cell death
PSMD10	9606.ENSP00000217958	GO Process	GO:0060548	Negative regulation of cell death
PTPMT1	9606.ENSP00000325958	GO Process	GO:0010941	Regulation of cell death
PTPMT1	9606.ENSP00000325958	GO Process	GO:0043067	Regulation of programmed cell death
QRICH1	9606.ENSP00000378830	GO Process	GO:0010941	Regulation of cell death
QRICH1	9606.ENSP00000378830	GO Process	GO:0010942	Positive regulation of cell death
QRICH1	9606.ENSP00000378830	GO Process	GO:0012501	Programmed cell death
QRICH1	9606.ENSP00000378830	GO Process	GO:0043067	Regulation of programmed cell death
QRICH1	9606.ENSP00000378830	GO Process	GO:0043068	Positive regulation of programmed cell death
RAB29	9606.ENSP00000356107	GO Process	GO:0010941	Regulation of cell death
RABGGTB	9606.ENSP00000317473	Reactome	HSA-6803205	TP53 regulates transcription of several additional cell death genes whose specific roles in p53-dependent apoptosis remain uncertain
RHOT1	9606.ENSP00000351132	GO Process	GO:0012501	Programmed cell death
RHOT1	9606.ENSP00000351132	GO Process	GO:1902686	Mitochondrial outer membrane permeabilization involved in programmed cell death
RHOT2	9606.ENSP00000321971	GO Process	GO:0012501	Programmed cell death
RHOT2	9606.ENSP00000321971	GO Process	GO:1902686	Mitochondrial outer membrane permeabilization involved in programmed cell death
RICTOR	9606.ENSP00000296782	GO Process	GO:0010941	Regulation of cell death
RICTOR	9606.ENSP00000296782	GO Process	GO:0043067	Regulation of programmed cell death
RICTOR	9606.ENSP00000296782	GO Process	GO:0043069	Negative regulation of programmed cell death
RICTOR	9606.ENSP00000296782	GO Process	GO:0060548	Negative regulation of cell death
RIPK1	9606.ENSP00000259808	GO Process	GO:0010939	Regulation of necrotic cell death
RIPK1	9606.ENSP00000259808	GO Process	GO:0010940	Positive regulation of necrotic cell death
RIPK1	9606.ENSP00000259808	GO Process	GO:0010941	Regulation of cell death
RIPK1	9606.ENSP00000259808	GO Process	GO:0010942	Positive regulation of cell death
RIPK1	9606.ENSP00000259808	GO Process	GO:0012501	Programmed cell death
RIPK1	9606.ENSP00000259808	GO Process	GO:0043067	Regulation of programmed cell death
RIPK1	9606.ENSP00000259808	GO Process	GO:0043068	Positive regulation of programmed cell death
RIPK1	9606.ENSP00000259808	GO Process	GO:0043069	Negative regulation of programmed cell death
RIPK1	9606.ENSP00000259808	GO Process	GO:0060547	Negative regulation of necrotic cell death
RIPK1	9606.ENSP00000259808	GO Process	GO:0060548	Negative regulation of cell death
RIPK1	9606.ENSP00000259808	GO Process	GO:0062098	Regulation of programmed necrotic cell death
RIPK1	9606.ENSP00000259808	GO Process	GO:0062099	Negative regulation of programmed necrotic cell death
RIPK1	9606.ENSP00000259808	GO Process	GO:0062100	Positive regulation of programmed necrotic cell death
RIPK1	9606.ENSP00000259808	GO Process	GO:0070265	Necrotic cell death
RIPK1	9606.ENSP00000259808	GO Process	GO:0097300	Programmed necrotic cell death
RIPK1	9606.ENSP00000259808	GO Process	GO:1903201	Regulation of oxidative stress-induced cell death
RIPK1	9606.ENSP00000259808	GO Process	GO:1903205	Regulation of hydrogen peroxide-induced cell death
RIPK1	9606.ENSP00000259808	GO Process	GO:1903209	Positive regulation of oxidative stress-induced cell death
RIPK1	9606.ENSP00000259808	GO Process	GO:1905206	Positive regulation of hydrogen peroxide-induced cell death
RIPK1	9606.ENSP00000259808	Reactome	HSA-2562578	TRIF-mediated programmed cell death
RIPK1	9606.ENSP00000259808	Reactome	HSA-5675482	Regulation of necroptotic cell death
RIPK1	9606.ENSP00000259808	Reactome	HSA-9013957	TLR3-mediated TICAM1-dependent programmed cell death
RIPK1	9606.ENSP00000259808	Reactome	HSA-9645723	Diseases of programmed cell death
RIPK1	9606.ENSP00000259808	Reactome	HSA-9692913	SARS-CoV-1-mediated effects on programmed cell death
RIPK1	9606.ENSP00000259808	SMART	SM00005	DEATH domain, found in proteins involved in cell death (apoptosis).
RMDN3	9606.ENSP00000260385	GO Process	GO:0012501	Programmed cell death
RRAS2	9606.ENSP00000256196	GO Process	GO:0010941	Regulation of cell death
SAV1	9606.ENSP00000324729	GO Process	GO:0010941	Regulation of cell death
SAV1	9606.ENSP00000324729	GO Process	GO:0010942	Positive regulation of cell death
SAV1	9606.ENSP00000324729	GO Process	GO:0012501	Programmed cell death
SAV1	9606.ENSP00000324729	GO Process	GO:0043067	Regulation of programmed cell death
SAV1	9606.ENSP00000324729	GO Process	GO:0043068	Positive regulation of programmed cell death
SDF2L1	9606.ENSP00000248958	GO Process	GO:0010941	Regulation of cell death
SDF2L1	9606.ENSP00000248958	GO Process	GO:0043067	Regulation of programmed cell death
SIGMAR1	9606.ENSP00000277010	GO Process	GO:0010941	Regulation of cell death
SIGMAR1	9606.ENSP00000277010	GO Process	GO:0043067	Regulation of programmed cell death
SLC27A4	9606.ENSP00000300456	GO Process	GO:0010941	Regulation of cell death
SLC27A4	9606.ENSP00000300456	GO Process	GO:0010942	Positive regulation of cell death
SLC27A4	9606.ENSP00000300456	GO Process	GO:0043067	Regulation of programmed cell death
SLC27A4	9606.ENSP00000300456	GO Process	GO:0043068	Positive regulation of programmed cell death
SLC39A10	9606.ENSP00000386766	GO Process	GO:0010941	Regulation of cell death
SLC39A10	9606.ENSP00000386766	GO Process	GO:0043067	Regulation of programmed cell death
SLC39A10	9606.ENSP00000386766	GO Process	GO:0043069	Negative regulation of programmed cell death
SLC39A10	9606.ENSP00000386766	GO Process	GO:0060548	Negative regulation of cell death
SLC7A11	9606.ENSP00000280612	GO Process	GO:0010941	Regulation of cell death
SLC7A11	9606.ENSP00000280612	GO Process	GO:0043067	Regulation of programmed cell death
SLC7A11	9606.ENSP00000280612	GO Process	GO:0060548	Negative regulation of cell death
SLC7A11	9606.ENSP00000280612	GO Process	GO:1903201	Regulation of oxidative stress-induced cell death
SLC7A11	9606.ENSP00000280612	GO Process	GO:1903202	Negative regulation of oxidative stress-induced cell death
SORT1	9606.ENSP00000256637	GO Process	GO:0012501	Programmed cell death
SPTLC1	9606.ENSP00000262554	GO Process	GO:0010941	Regulation of cell death
SPTLC1	9606.ENSP00000262554	GO Process	GO:0043067	Regulation of programmed cell death
STEAP3	9606.ENSP00000376822	GO Process	GO:0012501	Programmed cell death
STK3	9606.ENSP00000429744	GO Process	GO:0010941	Regulation of cell death
STK3	9606.ENSP00000429744	GO Process	GO:0010942	Positive regulation of cell death
STK3	9606.ENSP00000429744	GO Process	GO:0012501	Programmed cell death
STK3	9606.ENSP00000429744	GO Process	GO:0043067	Regulation of programmed cell death
STK3	9606.ENSP00000429744	GO Process	GO:0043068	Positive regulation of programmed cell death
TBK1	9606.ENSP00000329967	GO Process	GO:0010941	Regulation of cell death
TCTN3	9606.ENSP00000483364	GO Process	GO:0010941	Regulation of cell death
TCTN3	9606.ENSP00000483364	GO Process	GO:0010942	Positive regulation of cell death
TCTN3	9606.ENSP00000483364	GO Process	GO:0012501	Programmed cell death
TCTN3	9606.ENSP00000483364	GO Process	GO:0043067	Regulation of programmed cell death
TCTN3	9606.ENSP00000483364	GO Process	GO:0043068	Positive regulation of programmed cell death
TMEM161A	9606.ENSP00000162044	GO Process	GO:0010941	Regulation of cell death
TMEM161A	9606.ENSP00000162044	GO Process	GO:0043067	Regulation of programmed cell death
TMEM161A	9606.ENSP00000162044	GO Process	GO:0043069	Negative regulation of programmed cell death
TMEM161A	9606.ENSP00000162044	GO Process	GO:0060548	Negative regulation of cell death
TOLLIP	9606.ENSP00000314733	STRING clusters	CL:16730	Mixed, incl. MyD88-dependent toll-like receptor signaling pathway, and TRIF-mediated programmed cell death
TOMM70	9606.ENSP00000284320	GO Process	GO:0010941	Regulation of cell death
TOMM70	9606.ENSP00000284320	GO Process	GO:0043067	Regulation of programmed cell death
TRIM32	9606.ENSP00000408292	GO Process	GO:0010941	Regulation of cell death
TRIM32	9606.ENSP00000408292	GO Process	GO:0043067	Regulation of programmed cell death
TRIM32	9606.ENSP00000408292	GO Process	GO:0043069	Negative regulation of programmed cell death
TRIM32	9606.ENSP00000408292	GO Process	GO:0060548	Negative regulation of cell death
UNC93B1	9606.ENSP00000227471	STRING clusters	CL:16730	Mixed, incl. MyD88-dependent toll-like receptor signaling pathway, and TRIF-mediated programmed cell death
VMP1	9606.ENSP00000262291	WikiPathways	WP2509	Nanoparticle triggered autophagic cell death
VPS4A	9606.ENSP00000254950	GO Process	GO:0010941	Regulation of cell death
VPS4A	9606.ENSP00000254950	GO Process	GO:0060548	Negative regulation of cell death
WDR73	9606.ENSP00000387982	GO Process	GO:0010941	Regulation of cell death
WDR73	9606.ENSP00000387982	GO Process	GO:0043067	Regulation of programmed cell death
WDR73	9606.ENSP00000387982	GO Process	GO:0043069	Negative regulation of programmed cell death
WDR73	9606.ENSP00000387982	GO Process	GO:0060548	Negative regulation of cell death
WFS1	9606.ENSP00000226760	GO Process	GO:0010941	Regulation of cell death
WFS1	9606.ENSP00000226760	GO Process	GO:0043067	Regulation of programmed cell death
WFS1	9606.ENSP00000226760	GO Process	GO:0043069	Negative regulation of programmed cell death
WFS1	9606.ENSP00000226760	GO Process	GO:0060548	Negative regulation of cell death
YME1L1	9606.ENSP00000318480	GO Process	GO:0010941	Regulation of cell death
YME1L1	9606.ENSP00000318480	GO Process	GO:0043067	Regulation of programmed cell death
YME1L1	9606.ENSP00000318480	GO Process	GO:0043069	Negative regulation of programmed cell death
YME1L1	9606.ENSP00000318480	GO Process	GO:0060548	Negative regulation of cell death

## Sheet: Glutathione_metabolism
Column1	Column2	Column3	Column4	Column5
X.node	identifier	category	term.ID	term.description
ATP7B	9606.ENSP00000242839	STRING clusters	CL:9654	Mixed, incl. Glutathione metabolism, and Detoxification of Reactive Oxygen Species
ATP7B	9606.ENSP00000242839	STRING clusters	CL:9655	Mixed, incl. Glutathione metabolism, and Detoxification of Reactive Oxygen Species
ATP7B	9606.ENSP00000242839	STRING clusters	CL:9656	Mixed, incl. Glutathione metabolism, and Detoxification of Reactive Oxygen Species
ATP7B	9606.ENSP00000242839	STRING clusters	CL:9657	Mixed, incl. Glutathione metabolism, and Detoxification of Reactive Oxygen Species
CYP1B1	9606.ENSP00000478561	STRING clusters	CL:9654	Mixed, incl. Glutathione metabolism, and Detoxification of Reactive Oxygen Species
CYP1B1	9606.ENSP00000478561	STRING clusters	CL:9655	Mixed, incl. Glutathione metabolism, and Detoxification of Reactive Oxygen Species
CYP1B1	9606.ENSP00000478561	STRING clusters	CL:9656	Mixed, incl. Glutathione metabolism, and Detoxification of Reactive Oxygen Species
CYP1B1	9606.ENSP00000478561	STRING clusters	CL:9657	Mixed, incl. Glutathione metabolism, and Detoxification of Reactive Oxygen Species
CYP1B1	9606.ENSP00000478561	STRING clusters	CL:9739	Glutathione transferase activity, and Benzo(a)pyrene metabolism
CYP1B1	9606.ENSP00000478561	STRING clusters	CL:9741	Glutathione S-transferase, N-terminal domain, and Benzo(a)pyrene metabolism
CYP1B1	9606.ENSP00000478561	STRING clusters	CL:9743	Glutathione S-transferase, N-terminal domain, and Benzo(a)pyrene metabolism
GCLM	9606.ENSP00000359258	STRING clusters	CL:9654	Mixed, incl. Glutathione metabolism, and Detoxification of Reactive Oxygen Species
GCLM	9606.ENSP00000359258	STRING clusters	CL:9655	Mixed, incl. Glutathione metabolism, and Detoxification of Reactive Oxygen Species
GCLM	9606.ENSP00000359258	STRING clusters	CL:9656	Mixed, incl. Glutathione metabolism, and Detoxification of Reactive Oxygen Species
GCLM	9606.ENSP00000359258	KEGG	hsa00480	Glutathione metabolism
GCLM	9606.ENSP00000359258	WikiPathways	WP100	Glutathione metabolism
GGT7	9606.ENSP00000338964	STRING clusters	CL:9654	Mixed, incl. Glutathione metabolism, and Detoxification of Reactive Oxygen Species
GGT7	9606.ENSP00000338964	STRING clusters	CL:9655	Mixed, incl. Glutathione metabolism, and Detoxification of Reactive Oxygen Species
GGT7	9606.ENSP00000338964	STRING clusters	CL:9656	Mixed, incl. Glutathione metabolism, and Detoxification of Reactive Oxygen Species
GGT7	9606.ENSP00000338964	KEGG	hsa00480	Glutathione metabolism
GPX8	9606.ENSP00000423822	STRING clusters	CL:9654	Mixed, incl. Glutathione metabolism, and Detoxification of Reactive Oxygen Species
GPX8	9606.ENSP00000423822	STRING clusters	CL:9655	Mixed, incl. Glutathione metabolism, and Detoxification of Reactive Oxygen Species
GPX8	9606.ENSP00000423822	STRING clusters	CL:9656	Mixed, incl. Glutathione metabolism, and Detoxification of Reactive Oxygen Species
GPX8	9606.ENSP00000423822	STRING clusters	CL:9657	Mixed, incl. Glutathione metabolism, and Detoxification of Reactive Oxygen Species
GPX8	9606.ENSP00000423822	KEGG	hsa00480	Glutathione metabolism
HMOX2	9606.ENSP00000477572	STRING clusters	CL:9654	Mixed, incl. Glutathione metabolism, and Detoxification of Reactive Oxygen Species
HMOX2	9606.ENSP00000477572	STRING clusters	CL:9655	Mixed, incl. Glutathione metabolism, and Detoxification of Reactive Oxygen Species
HMOX2	9606.ENSP00000477572	STRING clusters	CL:9656	Mixed, incl. Glutathione metabolism, and Detoxification of Reactive Oxygen Species
HMOX2	9606.ENSP00000477572	STRING clusters	CL:9657	Mixed, incl. Glutathione metabolism, and Detoxification of Reactive Oxygen Species
MGST3	9606.ENSP00000356864	STRING clusters	CL:9654	Mixed, incl. Glutathione metabolism, and Detoxification of Reactive Oxygen Species
MGST3	9606.ENSP00000356864	STRING clusters	CL:9655	Mixed, incl. Glutathione metabolism, and Detoxification of Reactive Oxygen Species
MGST3	9606.ENSP00000356864	STRING clusters	CL:9656	Mixed, incl. Glutathione metabolism, and Detoxification of Reactive Oxygen Species
MGST3	9606.ENSP00000356864	STRING clusters	CL:9657	Mixed, incl. Glutathione metabolism, and Detoxification of Reactive Oxygen Species
MGST3	9606.ENSP00000356864	STRING clusters	CL:9739	Glutathione transferase activity, and Benzo(a)pyrene metabolism
MGST3	9606.ENSP00000356864	KEGG	hsa00480	Glutathione metabolism
