# Supplementary material for: CYP1B1-AS1 regulates CYP1B1 to promote Coxiella burnetii pathogenesis by inhibiting ROS and host cell death.
Source: Research Square preprint supplement (doi:10.21203/rs.3.rs-5390645/v1), 2024-12-11
Supplement: Supplementary file 8 [file Data S9. Mass Spectrometry Results of CBU_0937-3XFLAG Immunoprecipitation Analysis and Peptide Information.xlsx]

## Sheet: Sheet3
	CYP1B1-AS1 regulates CYP1B1 to promote Coxiella burnetii pathogenesis by inhibiting ROS and host cell death.
	Arunima et al. 2024
	Data S9. Mass Spectrometry Results of CBU_0937-3XFLAG Immunoprecipitation Analysis and Peptide Information

## Sheet: Sample details
Sample Name	Organism	Add. info (lysate, IP,etc)	Cell line
GFP-3XFLAG1	Homo sapiens	FLAG-IP	HEK293T transfected with pcDNA3.1 vector expressing C-term-3XFLAG tagged GFP
GFP-3XFLAG2	Homo sapiens	FLAG-IP	HEK293T transfected with pcDNA3.1 vector expressing C-term-3XFLAG tagged GFP
GFP-3XFLAG3	Homo sapiens	FLAG-IP	HEK293T transfected with pcDNA3.1 vector expressing C-term-3XFLAG tagged GFP
CBU0937-3XFLAG1	Homo sapiens	FLAG-IP	HEK293T transfected with pcDNA3.1 vector expressing C-term-3XFLAG tagged CBU_0937
CBU0937-3XFLAG2	Homo sapiens	FLAG-IP	HEK293T transfected with pcDNA3.1 vector expressing C-term-3XFLAG tagged CBU_0937
CBU0937-3XFLAG3	Homo sapiens	FLAG-IP	HEK293T transfected with pcDNA3.1 vector expressing C-term-3XFLAG tagged CBU_0937

## Sheet: CBU0937-FLAG-IP results
Protein FDR Confidence Combined	Master	Accession	Description	% Coverage	# Peptides	# PSMs	# Unique Peptides	MW in kDa	Gene Symbol	Abundance QEX3_GFP	Abundance QEX3_GFP	Abundance QEX3_GFP	Abundance QEX3_CBU0937	Abundance QEX3_CBU0937	Abundance QEX3_CBU0937
High	Master Protein	ARI65764.1	hypothetical protein B7L74_04780 [Coxiella burnetii] 0937	33	11	22	11	53.4					6.28415e+06	2.79051e+06	6012471
High	Master Protein	P52732	Kinesin-like protein KIF11 OS=Homo sapiens OX=9606 GN=KIF11 PE=1 SV=2	79	123	2452	123	119.1	KIF11	5.26106e+06	5.71794e+06	5.59261e+06	5.35791e+09	3.32042e+09	6.21901e+09
High	Master Protein	A0A075B6S2	Immunoglobulin kappa variable 2D-29 OS=Homo sapiens OX=9606 GN=IGKV2D-29 PE=3 SV=1	34	6	1064	3	13.1	IGKV2D-29	4.34918e+09	4.33058e+09	5.12278e+09	6.99021e+09	6.12429e+09	7.39027e+09
High	Master Protein	P52272	Heterogeneous nuclear ribonucleoprotein M OS=Homo sapiens OX=9606 GN=HNRNPM PE=1 SV=3	61	49	982	49	77.5	HNRNPM	1.72212e+08	1.27095e+08	1.93945e+08	3.36694e+08	1.85802e+08	3.87976e+08
High	Master Protein	P07437	Tubulin beta chain OS=Homo sapiens OX=9606 GN=TUBB PE=1 SV=2	67	28	918	5	49.6	TUBB	1.39014e+08	1.17646e+08	1.31515e+08	3.35692e+07	2.32957e+07	4.00596e+07
High	Master Protein	P06310	Immunoglobulin kappa variable 2-30 OS=Homo sapiens OX=9606 GN=IGKV2-30 PE=3 SV=2	26	5	811	3	13.2	IGKV2-30	4.89474e+06	4.54126e+06	5.10133e+06	9.4961e+06	9.27472e+06	8.05584e+06
High	Master Protein	P68371	Tubulin beta-4B chain OS=Homo sapiens OX=9606 GN=TUBB4B PE=1 SV=1	67	28	807	1	49.8	TUBB4B	4.46267e+08	3.27813e+08	4.33924e+08	1.29253e+08	8.1005e+07	1.58632e+08
High	Master Protein	A0A087WW87	Immunoglobulin kappa variable 2-40 OS=Homo sapiens OX=9606 GN=IGKV2-40 PE=3 SV=2	19	4	803	2	13.3	IGKV2-40	1.01787e+06	445579	144554	687080	414912	286770
High	Master Protein	Q9BVA1	Tubulin beta-2B chain OS=Homo sapiens OX=9606 GN=TUBB2B PE=1 SV=1	67	27	724	1	49.9	TUBB2B	1.44735e+06	1.03113e+06
High	Master Protein	Q13885	Tubulin beta-2A chain OS=Homo sapiens OX=9606 GN=TUBB2A PE=1 SV=1	67	27	721	1	49.9	TUBB2A	5.66458e+06	4.29103e+06	5.08724e+06	829119	1.00934e+06	923622
High	Master Protein	P08670	Vimentin OS=Homo sapiens OX=9606 GN=VIM PE=1 SV=4	85	54	646	49	53.6	VIM	2.12184e+08	1.50495e+08	2.062e+08	1.78628e+08	9.9403e+07	2.13041e+08
High	Master Protein	P04350	Tubulin beta-4A chain OS=Homo sapiens OX=9606 GN=TUBB4A PE=1 SV=2	60	22	640	1	49.6	TUBB4A	3.06861e+06	2.34782e+06	3.26803e+06	1.0333e+06	528510	872996
High	Master Protein	Q9BQE3	Tubulin alpha-1C chain OS=Homo sapiens OX=9606 GN=TUBA1C PE=1 SV=1	69	30	598	3	49.9	TUBA1C	5.51648e+08	4.09403e+08	5.08359e+08	1.02081e+08	7.63143e+07	1.31749e+08
High	Master Protein	Q71U36	Tubulin alpha-1A chain OS=Homo sapiens OX=9606 GN=TUBA1A PE=1 SV=1	69	30	571	2	50.1	TUBA1A	6.85285e+06	4.0766e+06	7.1855e+06	690066	356715	1.99151e+06
High	Master Protein	P60709	Actin, cytoplasmic 1 OS=Homo sapiens OX=9606 GN=ACTB PE=1 SV=1	71	25	519	10	41.7	ACTB	1.46943e+08	1.26177e+08	1.89982e+08	3.70526e+08	3.02949e+08	5.06367e+08
High	Master Protein	P68366	Tubulin alpha-4A chain OS=Homo sapiens OX=9606 GN=TUBA4A PE=1 SV=1	53	22	449	2	49.9	TUBA4A	220097	206218	200242		425918	79877.4
High	Master Protein	Q9BUF5	Tubulin beta-6 chain OS=Homo sapiens OX=9606 GN=TUBB6 PE=1 SV=1	32	14	343	4	49.8	TUBB6	4.13648e+07	3.2635e+07	3.80625e+07	5.27109e+07	4.38059e+07	1.01979e+08
High	Master Protein	P11142	Heat shock cognate 71 kDa protein OS=Homo sapiens OX=9606 GN=HSPA8 PE=1 SV=1	55	34	339	27	70.9	HSPA8	7.11907e+07	5.46919e+07	1.0388e+08	4.06896e+07	3.20277e+07	6.0223e+07
High	Master Protein	P68032	Actin, alpha cardiac muscle 1 OS=Homo sapiens OX=9606 GN=ACTC1 PE=1 SV=1	34	16	332	1	42	ACTC1	1.33094e+06	88757.3	4.02771e+06	1.01462e+07	1.77831e+06	2.58611e+07
High	Master Protein	P0DMV9	Heat shock 70 kDa protein 1B OS=Homo sapiens OX=9606 GN=HSPA1B PE=1 SV=1	55	37	325	32	70	HSPA1B	9.69372e+07	7.29212e+07	1.34766e+08	5.74866e+07	3.09964e+07	8.92864e+07
High	Master Protein	P62979	Ubiquitin-ribosomal protein eS31 fusion protein OS=Homo sapiens OX=9606 GN=RPS27A PE=1 SV=2	46	11	322	11	18	RPS27A	3.28816e+08	2.58457e+08	3.52538e+08	5.27029e+07	5.17671e+07	6.8738e+07
High	Master Protein	P62805	Histone H4 OS=Homo sapiens OX=9606 GN=H4C1 PE=1 SV=2	59	16	317	16	11.4	H4C1; H4C11; H4C12; H4C13; H4C14; H4C15; H4C16; H4C2; H4C3; H4C4; H4C5; H4C6; H4C8; H4C9	1.1774e+08	1.84146e+08	2.54701e+08	1.34245e+08	1.274e+08	2.36772e+08
High	Master Protein	P23396	Small ribosomal subunit protein uS3 OS=Homo sapiens OX=9606 GN=RPS3 PE=1 SV=2	87	29	313	29	26.7	RPS3	1.83518e+08	1.49469e+08	1.96865e+08	4.45266e+07	3.1466e+07	5.44777e+07
High	Master Protein	P15924	Desmoplakin OS=Homo sapiens OX=9606 GN=DSP PE=1 SV=3	26	73	296	73	331.6	DSP	2.09705e+07	1.508e+07	3.24097e+07	8.42859e+06	2.03317e+07	5.73674e+07
High	Master Protein	Q86YZ3	Hornerin OS=Homo sapiens OX=9606 GN=HRNR PE=1 SV=2	41	47	280	47	282.2	HRNR	3.04079e+07	1.09971e+07	2.56979e+07	1.46643e+07	2.59382e+07	6.01921e+07
High	Master Protein	A0A075B6R9	Probable non-functional immunoglobulin kappa variable 2D-24 OS=Homo sapiens OX=9606 GN=IGKV2D-24 PE=1 SV=1	27	6	280	5	13.1	IGKV2D-24	5.96675e+09	5.42654e+09	7.55985e+09	1.03822e+10	7.51574e+09	1.12677e+10
High	Master Protein	P49327	Fatty acid synthase OS=Homo sapiens OX=9606 GN=FASN PE=1 SV=3	36	67	250	67	273.3	FASN	8.39876e+06	1.3487e+07	1.48047e+07	2.7818e+07	2.85942e+07	3.46516e+07
High	Master Protein	P19474	E3 ubiquitin-protein ligase TRIM21 OS=Homo sapiens OX=9606 GN=TRIM21 PE=1 SV=1	52	28	243	28	54.1	TRIM21	3.8541e+08	2.27111e+08	7.44112e+08	1.18269e+09	4.8861e+08	1.60592e+09
High	Master Protein	P08238	Heat shock protein HSP 90-beta OS=Homo sapiens OX=9606 GN=HSP90AB1 PE=1 SV=4	34	24	238	12	83.2	HSP90AB1	2.03694e+07	1.92541e+07	2.69815e+07	1.06439e+07	9.69864e+06	1.44865e+07
High	Master Protein	O75688	Protein phosphatase 1B OS=Homo sapiens OX=9606 GN=PPM1B PE=1 SV=1	51	24	237	24	52.6	PPM1B	108540	176152	472384	6.57517e+07	3.68307e+07	8.27513e+07
High	Master Protein	P13010	X-ray repair cross-complementing protein 5 OS=Homo sapiens OX=9606 GN=XRCC5 PE=1 SV=3	48	33	234	33	82.7	XRCC5	1.44587e+07	1.38694e+07	2.19741e+07	3.25238e+07	2.26624e+07	4.29549e+07
High	Master Protein	P11940	Polyadenylate-binding protein 1 OS=Homo sapiens OX=9606 GN=PABPC1 PE=1 SV=2	43	30	232	22	70.6	PABPC1	1.37118e+07	1.2297e+07	1.98434e+07	3.65251e+07	2.30044e+07	5.29786e+07
High	Master Protein	P31943	Heterogeneous nuclear ribonucleoprotein H OS=Homo sapiens OX=9606 GN=HNRNPH1 PE=1 SV=4	54	17	224	8	49.2	HNRNPH1	4.48976e+07	3.76095e+07	5.59204e+07	5.33754e+07	3.49451e+07	7.14461e+07
High	Master Protein	P12956	X-ray repair cross-complementing protein 6 OS=Homo sapiens OX=9606 GN=XRCC6 PE=1 SV=2	55	30	222	30	69.8	XRCC6	7.19432e+06	6.66638e+06	1.13993e+07	2.08425e+07	1.16785e+07	3.35891e+07
High	Master Protein	P61978	Heterogeneous nuclear ribonucleoprotein K OS=Homo sapiens OX=9606 GN=HNRNPK PE=1 SV=1	45	21	208	21	50.9	HNRNPK	1.75593e+07	1.28061e+07	1.95175e+07	3.34748e+07	1.68686e+07	4.54911e+07
High	Master Protein	O95881	Thioredoxin domain-containing protein 12 OS=Homo sapiens OX=9606 GN=TXNDC12 PE=1 SV=1	52	11	207	11	19.2	TXNDC12	6.48896e+07	6.37845e+07	8.48032e+07	1.4697e+08	7.79788e+07	2.29748e+08
High	Master Protein	P13639	Elongation factor 2 OS=Homo sapiens OX=9606 GN=EEF2 PE=1 SV=4	41	31	200	30	95.3	EEF2	2.82881e+07	2.34548e+07	3.92515e+07	1.97553e+07	1.25443e+07	2.66897e+07
High	Master Protein	P05141	ADP/ATP translocase 2 OS=Homo sapiens OX=9606 GN=SLC25A5 PE=1 SV=7	44	15	199	3	32.8	SLC25A5	1.55557e+08	1.29538e+08	1.90106e+08	4.44453e+07	3.41629e+07	5.53453e+07
High	Master Protein	Q9NXV2	BTB/POZ domain-containing protein KCTD5 OS=Homo sapiens OX=9606 GN=KCTD5 PE=1 SV=1	83	16	199	15	26.1	KCTD5	4.162e+06	1.92611e+06	416130	1.22032e+08	6.95383e+07	1.72931e+08
High	Master Protein	P68104	Elongation factor 1-alpha 1 OS=Homo sapiens OX=9606 GN=EEF1A1 PE=1 SV=1	40	20	195	20	50.1	EEF1A1	7.09889e+07	6.31739e+07	7.72026e+07	5.93527e+07	5.08106e+07	7.40669e+07
High	Master Protein	P07910	Heterogeneous nuclear ribonucleoproteins C1/C2 OS=Homo sapiens OX=9606 GN=HNRNPC PE=1 SV=4	41	16	195	16	33.7	HNRNPC	3.9702e+07	3.34816e+07	3.83102e+07	6.69026e+07	5.07945e+07	8.84952e+07
High	Master Protein	P14618	Pyruvate kinase PKM OS=Homo sapiens OX=9606 GN=PKM PE=1 SV=4	53	27	195	26	57.9	PKM	1.11629e+07	7.39573e+06	1.24215e+07	1.98708e+07	1.41526e+07	3.25847e+07
High	Master Protein	Q08211	ATP-dependent RNA helicase A OS=Homo sapiens OX=9606 GN=DHX9 PE=1 SV=4	27	29	193	29	140.9	DHX9	1.51388e+07	1.55167e+07	1.41851e+07	2.27872e+07	1.70913e+07	2.44929e+07
High	Master Protein	O60814	Histone H2B type 1-K OS=Homo sapiens OX=9606 GN=H2BC12 PE=1 SV=3	64	12	181	3	13.9	H2BC12	123804090	1.70092e+08	2.11121e+08	1.50197e+08	1.05569e+08	2.58835e+08
High	Master Protein	P07900	Heat shock protein HSP 90-alpha OS=Homo sapiens OX=9606 GN=HSP90AA1 PE=1 SV=5	32	24	179	14	84.6	HSP90AA1	27022287	2.66218e+07	3.6707e+07	1.55481e+07	1.29763e+07	2.14996e+07
High	Master Protein	Q8N257	Histone H2B type 3-B OS=Homo sapiens OX=9606 GN=H2BC26 PE=1 SV=3	64	12	170	2	13.9	H2BC26	4.92745e+06	5.74357e+06	1.00892e+07	7.14569e+06	4.47994e+06	12751828
High	Master Protein	P12236	ADP/ATP translocase 3 OS=Homo sapiens OX=9606 GN=SLC25A6 PE=1 SV=4	40	14	169	2	32.8	SLC25A6	3.66591e+06	2.89742e+06	3.56038e+06	830474	803876	1.16277e+06
High	Master Protein	P46781	Small ribosomal subunit protein uS4 OS=Homo sapiens OX=9606 GN=RPS9 PE=1 SV=3	58	18	164	18	22.6	RPS9	33757134	3.9924e+07	5.94602e+07	4.64082e+07	2.8643e+07	6.88708e+07
High	Master Protein	P69905	Hemoglobin subunit alpha OS=Homo sapiens OX=9606 GN=HBA1 PE=1 SV=2	27	5	162	5	15.2	HBA1; HBA2	179394	1.07498e+07	1.826e+06	9.74253e+07	2.67497e+09	3.98024e+07
High	Master Protein	O00571	ATP-dependent RNA helicase DDX3X OS=Homo sapiens OX=9606 GN=DDX3X PE=1 SV=3	44	26	161	25	73.2	DDX3X	1.7119e+07	1.53775e+07	2.69094e+07	1.90622e+07	1.05122e+07	2.49388e+07
High	Master Protein	P43243	Matrin-3 OS=Homo sapiens OX=9606 GN=MATR3 PE=1 SV=2	30	20	158	20	94.6	MATR3	9.80648e+06	1.17183e+07	1.66265e+07	1.44673e+07	1.11175e+07	1.93707e+07
High	Master Protein	P25705	ATP synthase subunit alpha, mitochondrial OS=Homo sapiens OX=9606 GN=ATP5F1A PE=1 SV=1	45	21	155	21	59.7	ATP5F1A	2.51838e+07	1.98326e+07	2.53481e+07	9.86577e+06	2.0463e+07	1.38888e+07
High	Master Protein	P62269	Small ribosomal subunit protein uS13 OS=Homo sapiens OX=9606 GN=RPS18 PE=1 SV=3	55	14	147	14	17.7	RPS18	5.75208e+07	6.99527e+07	1.05609e+08	4.34267e+07	2.37935e+07	6.29544e+07
High	Master Protein	Q96PK6	RNA-binding protein 14 OS=Homo sapiens OX=9606 GN=RBM14 PE=1 SV=2	31	20	144	20	69.4	RBM14	1.04573e+07	1.02895e+07	2.25974e+07	1.38811e+07	9.52716e+06	2.20415e+07
High	Master Protein	P17844	Probable ATP-dependent RNA helicase DDX5 OS=Homo sapiens OX=9606 GN=DDX5 PE=1 SV=1	36	22	139	14	69.1	DDX5	1.40645e+07	1.14959e+07	1.58762e+07	1.41154e+07	8.36085e+06	1.93807e+07
High	Master Protein	P15880	Small ribosomal subunit protein uS5 OS=Homo sapiens OX=9606 GN=RPS2 PE=1 SV=2	53	16	135	16	31.3	RPS2	5.61095e+07	4.49549e+07	7.9918e+07	2.78743e+07	1.54827e+07	4.02985e+07
High	Master Protein	P52597	Heterogeneous nuclear ribonucleoprotein F OS=Homo sapiens OX=9606 GN=HNRNPF PE=1 SV=3	28	9	131	7	45.6	HNRNPF	4.39483e+06	3.57485e+06	6.13079e+06	5.1019e+06	2.78536e+06	6.7223e+06
High	Master Protein	P55795	Heterogeneous nuclear ribonucleoprotein H2 OS=Homo sapiens OX=9606 GN=HNRNPH2 PE=1 SV=1	23	9	131	1	49.2	HNRNPH2	470204	367346	749243	370962	268616	462585
High	Master Protein	Q6FI13	Histone H2A type 2-A OS=Homo sapiens OX=9606 GN=H2AC18 PE=1 SV=3	63	8	131	3	14.1	H2AC18; H2AC19	7.09154e+07	1.06166e+08	234737482	1.07752e+08	9.59949e+07	2.6834e+08
High	Master Protein	P05388	Large ribosomal subunit protein uL10 OS=Homo sapiens OX=9606 GN=RPLP0 PE=1 SV=1	38	15	129	15	34.3	RPLP0	1.34409e+07	1.09223e+07	1.70814e+07	2.26517e+07	1.53315e+07	3.07756e+07
High	Master Protein	Q00839	Heterogeneous nuclear ribonucleoprotein U OS=Homo sapiens OX=9606 GN=HNRNPU PE=1 SV=6	20	19	128	19	90.5	HNRNPU	1.70078e+07	1.82556e+07	2.68986e+07	1.95108e+07	1.27107e+07	2.78996e+07
High	Master Protein	Q92841	Probable ATP-dependent RNA helicase DDX17 OS=Homo sapiens OX=9606 GN=DDX17 PE=1 SV=2	27	18	128	10	80.2	DDX17	2.78838e+06	2.61585e+06	5.44633e+06	4.07156e+06	2.85259e+06	6.51015e+06
High	Master Protein	P55036	26S proteasome non-ATPase regulatory subunit 4 OS=Homo sapiens OX=9606 GN=PSMD4 PE=1 SV=1	46	15	122	15	40.7	PSMD4	4.22227e+06	2.89006e+06	4.3152e+06	1.95737e+07	1.05067e+07	2.40834e+07
High	Master Protein	P36578	Large ribosomal subunit protein uL4 OS=Homo sapiens OX=9606 GN=RPL4 PE=1 SV=5	39	18	121	18	47.7	RPL4	7.5419e+06	7.74185e+06	1.32832e+07	1.90303e+07	9.55023e+06	3.39216e+07
High	Master Protein	P11021	Endoplasmic reticulum chaperone BiP OS=Homo sapiens OX=9606 GN=HSPA5 PE=1 SV=2	34	20	120	18	72.3	HSPA5	6.08499e+06	5.78977e+06	9.18392e+06	6.24883e+06	7.46431e+06	8.30976e+06
High	Master Protein	P04908	Histone H2A type 1-B/E OS=Homo sapiens OX=9606 GN=H2AC4 PE=1 SV=2	41	7	119	3	14.1	H2AC4; H2AC8	731192	936903	1.70194e+06	688611	697005	1.02053e+06
High	Master Protein	Q9NR30	Nucleolar RNA helicase 2 OS=Homo sapiens OX=9606 GN=DDX21 PE=1 SV=5	28	19	115	17	87.3	DDX21	7.40733e+06	7.04708e+06	9.73491e+06	7.58064e+06	5.8936e+06	1.10477e+07
High	Master Protein	Q8N5Z5	BTB/POZ domain-containing protein KCTD17 OS=Homo sapiens OX=9606 GN=KCTD17 PE=1 SV=3	45	12	115	12	35.6					2.78164e+07	1.4115e+07	2.84407e+07
High	Master Protein	P68431	Histone H3.1 OS=Homo sapiens OX=9606 GN=H3C1 PE=1 SV=2	39	9	115	4	15.4	H3C1; H3C10; H3C11; H3C12; H3C2; H3C3; H3C4; H3C6; H3C7; H3C8	1.66139e+08	2.12052e+08	2.99623e+08	197870985	1.64001e+08	2.96087e+08
High	Master Protein	O14744	Protein arginine N-methyltransferase 5 OS=Homo sapiens OX=9606 GN=PRMT5 PE=1 SV=4	27	18	113	18	72.6	PRMT5	2.21578e+06	1.52936e+06	3.44136e+06	2.78287e+07	1.47741e+07	3.72954e+07
High	Master Protein	Q06830	Peroxiredoxin-1 OS=Homo sapiens OX=9606 GN=PRDX1 PE=1 SV=1	51	12	110	8	22.1	PRDX1	2.54928e+07	2.19051e+07	2.64858e+07	3.51884e+07	3.68536e+07	4.53232e+07
High	Master Protein	P02768	Albumin OS=Homo sapiens OX=9606 GN=ALB PE=1 SV=2	45	25	108	25	69.3	ALB	1.90971e+07	1.44804e+07	2.54263e+07	3.03337e+07	2.14795e+08	5.89809e+07
High	Master Protein	P62249	Small ribosomal subunit protein uS9 OS=Homo sapiens OX=9606 GN=RPS16 PE=1 SV=2	74	15	108	15	16.4	RPS16	3.51034e+07	4.31964e+07	5.82636e+07	1.38734e+07	1.32483e+07	2.096e+07
High	Master Protein	P22626	Heterogeneous nuclear ribonucleoproteins A2/B1 OS=Homo sapiens OX=9606 GN=HNRNPA2B1 PE=1 SV=2	53	17	105	14	37.4	HNRNPA2B1	9.74295e+06	8.0937e+06	1.48161e+07	2.15756e+07	1.26844e+07	3.87035e+07
High	Master Protein	P19338	Nucleolin OS=Homo sapiens OX=9606 GN=NCL PE=1 SV=3	29	19	103	19	76.6	NCL	6.4355e+06	5.85968e+06	6.90263e+06	1.68115e+07	1.05874e+07	2.06212e+07
High	Master Protein	O43242	26S proteasome non-ATPase regulatory subunit 3 OS=Homo sapiens OX=9606 GN=PSMD3 PE=1 SV=2	49	24	102	24	60.9	PSMD3	1.77576e+07	1.43527e+07	1.85028e+07	2.14572e+06	1.9741e+06	3.32968e+06
High	Master Protein	P38646	Stress-70 protein, mitochondrial OS=Homo sapiens OX=9606 GN=HSPA9 PE=1 SV=2	28	17	101	16	73.6	HSPA9	7.06641e+06	5.99343e+06	1.05261e+07	7.18708e+06	4.12374e+06	9.60272e+06
High	Master Protein	P14923	Junction plakoglobin OS=Homo sapiens OX=9606 GN=JUP PE=1 SV=3	42	27	100	27	81.7	JUP	6.77542e+06	3.23935e+06	8.99219e+06	4.3765e+06	1.04044e+07	2.4529e+07
High	Master Protein	Q13310	Polyadenylate-binding protein 4 OS=Homo sapiens OX=9606 GN=PABPC4 PE=1 SV=1	34	20	99	12	70.7	PABPC4	1.31259e+06	1.20327e+06	2.85138e+06	4.64424e+06	2.57145e+06	6.94522e+06
High	Master Protein	Q00610	Clathrin heavy chain 1 OS=Homo sapiens OX=9606 GN=CLTC PE=1 SV=5	19	24	99	24	191.5	CLTC	5.15781e+06	5.9886e+06	6.18574e+06	4.20598e+06	4.38537e+06	4.3888e+06
High	Master Protein	P18124	Large ribosomal subunit protein uL30 OS=Homo sapiens OX=9606 GN=RPL7 PE=1 SV=1	42	15	99	15	29.2	RPL7	8.12512e+06	8.56616e+06	1.78011e+07	2.84614e+07	1.54677e+07	4.4461e+07
High	Master Protein	P27635	Large ribosomal subunit protein uL16 OS=Homo sapiens OX=9606 GN=RPL10 PE=1 SV=5	49	13	99	13	24.6	RPL10	1.98316e+07	2.19438e+07	3.64353e+07	1.62193e+07	9.25361e+06	2.30114e+07
High	Master Protein	Q6P3W7	SCY1-like protein 2 OS=Homo sapiens OX=9606 GN=SCYL2 PE=1 SV=1	30	22	98	22	103.6	SCYL2	344569	512198	436962	2.14077e+07	1.25099e+07	2.806e+07
High	Master Protein	Q02413	Desmoglein-1 OS=Homo sapiens OX=9606 GN=DSG1 PE=1 SV=2	29	23	98	23	113.7	DSG1	7.41086e+06	4.04787e+06	9.82507e+06	4.45992e+06	1.05288e+07	2.60029e+07
High	Master Protein	P62424	Large ribosomal subunit protein eL8 OS=Homo sapiens OX=9606 GN=RPL7A PE=1 SV=2	33	11	98	11	30	RPL7A	7.39081e+06	7.97766e+06	1.52493e+07	1.769e+07	1.09305e+07	2.8324e+07
High	Master Protein	P26599	Polypyrimidine tract-binding protein 1 OS=Homo sapiens OX=9606 GN=PTBP1 PE=1 SV=2	26	11	96	11	59.6	PTBP1	4.98908e+06	3.70656e+06	7.11543e+06	5.19089e+06	3.09582e+06	8.47169e+06
High	Master Protein	Q15208	Serine/threonine-protein kinase 38 OS=Homo sapiens OX=9606 GN=STK38 PE=1 SV=1	36	19	96	15	54.2	STK38	5.15643e+06	4.92534e+06	4.60543e+06	3.414e+07	2.24675e+07	43669327
High	Master Protein	Q9Y2W1	Thyroid hormone receptor-associated protein 3 OS=Homo sapiens OX=9606 GN=THRAP3 PE=1 SV=2	23	19	93	19	108.6	THRAP3	2.11961e+06	2.36574e+06	3.45507e+06	2.72396e+07	1.49409e+07	3.28321e+07
High	Master Protein	Q9NYF8	Bcl-2-associated transcription factor 1 OS=Homo sapiens OX=9606 GN=BCLAF1 PE=1 SV=2	21	19	91	19	106.1	BCLAF1	1.04284e+06	1.37926e+06	1.95305e+06	2.26542e+07	1.30257e+07	3.0718e+07
High	Master Protein	P10809	60 kDa heat shock protein, mitochondrial OS=Homo sapiens OX=9606 GN=HSPD1 PE=1 SV=2	46	23	91	23	61	HSPD1	1.29778e+07	7.62793e+06	1.24992e+07	2.42403e+07	1.62455e+07	3.16644e+07
High	Master Protein	P49411	Elongation factor Tu, mitochondrial OS=Homo sapiens OX=9606 GN=TUFM PE=1 SV=3	49	18	90	18	49.8	TUFM	1.92861e+07	1.42688e+07	1.72852e+07	1.06911e+07	9.62212e+06	1.37871e+07
High	Master Protein	O43143	ATP-dependent RNA helicase DHX15 OS=Homo sapiens OX=9606 GN=DHX15 PE=1 SV=2	19	15	89	15	90.9	DHX15	5.96488e+06	5.68525e+06	5.93543e+06	5.91029e+06	4.25698e+06	6.4787e+06
High	Master Protein	Q14681	BTB/POZ domain-containing protein KCTD2 OS=Homo sapiens OX=9606 GN=KCTD2 PE=1 SV=3	54	10	89	9	28.5	KCTD2				2.44309e+07	1.50934e+07	3.46743e+07
High	Master Protein	P62701	Small ribosomal subunit protein eS4, X isoform OS=Homo sapiens OX=9606 GN=RPS4X PE=1 SV=2	58	18	88	18	29.6	RPS4X	2.93082e+07	2.6699e+07	4.78862e+07	1.89017e+07	1.06494e+07	2.82088e+07
High	Master Protein	P06748	Nucleophosmin OS=Homo sapiens OX=9606 GN=NPM1 PE=1 SV=2	35	12	87	12	32.6	NPM1	1.72787e+07	1.42856e+07	2.06614e+07	1.90276e+07	1.1966e+07	3.0509e+07
High	Master Protein	O43175	D-3-phosphoglycerate dehydrogenase OS=Homo sapiens OX=9606 GN=PHGDH PE=1 SV=4	29	12	85	12	56.6	PHGDH	9.42427e+06	7.1288e+06	8.28381e+06	1.04107e+07	7.06137e+06	1.18406e+07
High	Master Protein	P62280	Small ribosomal subunit protein uS17 OS=Homo sapiens OX=9606 GN=RPS11 PE=1 SV=3	58	12	85	12	18.4	RPS11	3.81083e+07	3.6638e+07	8.62346e+07	1.52471e+07	8.86526e+06	2.6907e+07
High	Master Protein	P62937	Peptidyl-prolyl cis-trans isomerase A OS=Homo sapiens OX=9606 GN=PPIA PE=1 SV=2	41	9	83	9	18	PPIA	3.84793e+06	4.95047e+06	7.60038e+06	1.09136e+07	9.38667e+06	2.0694e+07
High	Master Protein	P32119	Peroxiredoxin-2 OS=Homo sapiens OX=9606 GN=PRDX2 PE=1 SV=5	41	10	82	9	21.9	PRDX2	5.38369e+06	4.32962e+06	5.60683e+06	6.56578e+06	1.37818e+07	1.2534e+07
High	Master Protein	P62917	Large ribosomal subunit protein uL2 OS=Homo sapiens OX=9606 GN=RPL8 PE=1 SV=2	32	12	81	12	28	RPL8	9.77781e+06	8.676e+06	2.11145e+07	2.8035e+07	1.49673e+07	4.01761e+07
High	Master Protein	P61247	Small ribosomal subunit protein eS1 OS=Homo sapiens OX=9606 GN=RPS3A PE=1 SV=2	55	16	81	16	29.9	RPS3A	1.02367e+07	8.02118e+06	1.26632e+07	1.34015e+07	8.19759e+06	1.70149e+07
High	Master Protein	P01876	Immunoglobulin heavy constant alpha 1 OS=Homo sapiens OX=9606 GN=IGHA1 PE=1 SV=3	29	11	81	5	42.8	IGHA1	5.8219e+07	1.81469e+07	3.06403e+07	1.2225e+08	6.65115e+06	2.49626e+07
High	Master Protein	Q02878	Large ribosomal subunit protein eL6 OS=Homo sapiens OX=9606 GN=RPL6 PE=1 SV=3	42	12	80	12	32.7	RPL6	5.06438e+06	4.45138e+06	9.44728e+06	1.4661e+07	7.13755e+06	2.15268e+07
High	Master Protein	P27708	CAD protein OS=Homo sapiens OX=9606 GN=CAD PE=1 SV=3	16	29	79	26	242.8	CAD	4.29386e+06	8.50715e+06	1.07649e+07	2.6886e+06	3.58135e+06	3.11602e+06
High	Master Protein	P60842	Eukaryotic initiation factor 4A-I OS=Homo sapiens OX=9606 GN=EIF4A1 PE=1 SV=1	48	15	78	14	46.1	EIF4A1	1.11545e+07	1.1224e+07	1.50923e+07	6.36794e+06	6.47935e+06	6.89252e+06
High	Master Protein	Q9UJS0	Electrogenic aspartate/glutamate antiporter SLC25A13, mitochondrial OS=Homo sapiens OX=9606 GN=SLC25A13 PE=1 SV=2	38	22	78	16	74.1	SLC25A13	1.06711e+07	8.73988e+06	1.23247e+07	1.03142e+06	1.37534e+06	1.89392e+06
High	Master Protein	P39023	Large ribosomal subunit protein uL3 OS=Homo sapiens OX=9606 GN=RPL3 PE=1 SV=2	41	17	77	17	46.1	RPL3	1.15795e+07	1.20674e+07	1.99303e+07	2.74206e+07	1.64137e+07	3.64401e+07
High	Master Protein	P17987	T-complex protein 1 subunit alpha OS=Homo sapiens OX=9606 GN=TCP1 PE=1 SV=1	31	14	75	14	60.3	TCP1	9.65921e+06	7.09251e+06	8.46759e+06	8752338	6.49311e+06	1.07638e+07
High	Master Protein	P62258	14-3-3 protein epsilon OS=Homo sapiens OX=9606 GN=YWHAE PE=1 SV=1	50	14	75	11	29.2	YWHAE	1.50499e+07	1.29751e+07	1.55193e+07	1.0998e+07	1.00923e+07	1.31367e+07
High	Master Protein	P27348	14-3-3 protein theta OS=Homo sapiens OX=9606 GN=YWHAQ PE=1 SV=1	47	11	74	5	27.7	YWHAQ	5.36466e+06	4.28577e+06	6.01291e+06	3.53449e+06	2.66288e+06	4.13745e+06
High	Master Protein	P63104	14-3-3 protein zeta/delta OS=Homo sapiens OX=9606 GN=YWHAZ PE=1 SV=1	45	10	72	6	27.7	YWHAZ	3.6277e+07	2.36016e+07	3.27735e+07	6.04527e+07	2.36126e+07	5.99568e+07
High	Master Protein	P62241	Small ribosomal subunit protein eS8 OS=Homo sapiens OX=9606 GN=RPS8 PE=1 SV=2	39	10	71	10	24.2	RPS8	4.70716e+06	4.19699e+06	8.03712e+06	1.05081e+07	6.44061e+06	1.64662e+07
High	Master Protein	Q07020	Large ribosomal subunit protein eL18 OS=Homo sapiens OX=9606 GN=RPL18 PE=1 SV=2	43	8	71	8	21.6	RPL18	4.32435e+06	4.88444e+06	7.986e+06	1.30454e+07	7.79493e+06	2.0945e+07
High	Master Protein	P31946	14-3-3 protein beta/alpha OS=Homo sapiens OX=9606 GN=YWHAB PE=1 SV=3	30	8	70	2	28.1	YWHAB	932608	771059	904838	920578	831667	1.54515e+06
High	Master Protein	P41252	Isoleucine--tRNA ligase, cytoplasmic OS=Homo sapiens OX=9606 GN=IARS1 PE=1 SV=2	18	20	70	20	144.4	IARS1	1.30544e+07	1.42671e+07	1.14486e+07	1.80732e+06	1.55986e+06	1.15076e+06
High	Master Protein	P09211	Glutathione S-transferase P OS=Homo sapiens OX=9606 GN=GSTP1 PE=1 SV=2	52	8	70	8	23.3	GSTP1	5.56901e+06	4.9357e+06	6.67212e+06	1.6417e+07	1.06837e+07	2.55923e+07
High	Master Protein	Q96HS1	Serine/threonine-protein phosphatase PGAM5, mitochondrial OS=Homo sapiens OX=9606 GN=PGAM5 PE=1 SV=2	33	12	70	12	32	PGAM5	1.33439e+07	1.19754e+07	1.76525e+07	9267006	8.57826e+06	1.60927e+07
High	Master Protein	Q04637	Eukaryotic translation initiation factor 4 gamma 1 OS=Homo sapiens OX=9606 GN=EIF4G1 PE=1 SV=4	15	22	69	22	175.4	EIF4G1	7.12765e+06	1.51816e+07	2.45002e+07	443833	610575	968758
High	Master Protein	P04406	Glyceraldehyde-3-phosphate dehydrogenase OS=Homo sapiens OX=9606 GN=GAPDH PE=1 SV=3	41	11	69	11	36	GAPDH	4.91031e+06	3.62261e+06	8.47272e+06	6.01258e+06	1.03196e+07	1.43061e+07
High	Master Protein	Q5TEC6	Histone H3-7 OS=Homo sapiens OX=9606 GN=H3-7 PE=1 SV=1	29	6	68	1	15.4	H3-7	8.97912e+06	1.19794e+07	1.5217e+07	9.72608e+06	1.09872e+07	1.51913e+07
High	Master Protein	P52292	Importin subunit alpha-1 OS=Homo sapiens OX=9606 GN=KPNA2 PE=1 SV=1	26	11	68	11	57.8	KPNA2	9.81941e+06	7.74351e+06	7.90281e+06	2.91789e+06	2.102e+06	3.01445e+06
High	Master Protein	P50991	T-complex protein 1 subunit delta OS=Homo sapiens OX=9606 GN=CCT4 PE=1 SV=4	33	16	67	15	57.9	CCT4	5.16428e+06	3.96277e+06	5.06143e+06	7.42045e+06	5.97348e+06	9.12264e+06
High	Master Protein	P50990	T-complex protein 1 subunit theta OS=Homo sapiens OX=9606 GN=CCT8 PE=1 SV=4	31	16	67	16	59.6	CCT8	4.75035e+06	2.78209e+06	3.64164e+06	8.35665e+06	6.11289e+06	9.82836e+06
High	Master Protein	P62906	Large ribosomal subunit protein uL1 OS=Homo sapiens OX=9606 GN=RPL10A PE=1 SV=2	41	11	65	11	24.8	RPL10A	8.19219e+06	7.44526e+06	1.31249e+07	1.69729e+07	1.09814e+07	2.97794e+07
High	Master Protein	P38159	RNA-binding motif protein, X chromosome OS=Homo sapiens OX=9606 GN=RBMX PE=1 SV=3	30	12	65	12	42.3	RBMX	4.01428e+06	3.25062e+06	6.41866e+06	7.9326e+06	4.63708e+06	1.11177e+07
High	Master Protein	Q15365	Poly(rC)-binding protein 1 OS=Homo sapiens OX=9606 GN=PCBP1 PE=1 SV=2	44	10	65	7	37.5	PCBP1	8.79962e+06	7.57841e+06	9.58945e+06	4.21294e+06	3.28808e+06	4.00742e+06
High	Master Protein	P20700	Lamin-B1 OS=Homo sapiens OX=9606 GN=LMNB1 PE=1 SV=2	33	19	64	15	66.4	LMNB1	6.93374e+06	5.3643e+06	6.74454e+06	4.74702e+06	3.15552e+06	8.90708e+06
High	Master Protein	O14654	Insulin receptor substrate 4 OS=Homo sapiens OX=9606 GN=IRS4 PE=1 SV=1	17	18	64	18	133.7	IRS4	1.43882e+07	1.42687e+07	1.61344e+07	3.54299e+06	2.73039e+06	3.56074e+06
High	Master Protein	P40227	T-complex protein 1 subunit zeta OS=Homo sapiens OX=9606 GN=CCT6A PE=1 SV=3	26	13	63	13	58	CCT6A	3.64562e+06	3.15492e+06	3.66623e+06	5.73646e+06	4.04759e+06	7.41611e+06
High	Master Protein	Q02978	Mitochondrial 2-oxoglutarate/malate carrier protein OS=Homo sapiens OX=9606 GN=SLC25A11 PE=1 SV=3	44	11	63	11	34	SLC25A11	1.0228e+07	8.63431e+06	9.3802e+06	1.49731e+06	1.11933e+06	2.12277e+06
High	Master Protein	P26641	Elongation factor 1-gamma OS=Homo sapiens OX=9606 GN=EEF1G PE=1 SV=3	22	10	62	10	50.1	EEF1G	5.63798e+06	5.15398e+06	7.05949e+06	6.15627e+06	4.85628e+06	8.12828e+06
High	Master Protein	Q16629	Serine/arginine-rich splicing factor 7 OS=Homo sapiens OX=9606 GN=SRSF7 PE=1 SV=1	28	8	62	7	27.4	SRSF7	2.01266e+06	2.69526e+06	3.59541e+06	1.7434e+07	1.00991e+07	2.54248e+07
High	Master Protein	Q4VCS5	Angiomotin OS=Homo sapiens OX=9606 GN=AMOT PE=1 SV=1	21	17	61	17	118	AMOT	8.89142e+06	1.00787e+07	1.01853e+07	1.31361e+07	1.58245e+07	7.69564e+06
High	Master Protein	P61981	14-3-3 protein gamma OS=Homo sapiens OX=9606 GN=YWHAG PE=1 SV=2	23	6	61	2	28.3	YWHAG	373572	265405	474937	304671	339898	369957
High	Master Protein	P01833	Polymeric immunoglobulin receptor OS=Homo sapiens OX=9606 GN=PIGR PE=1 SV=4	23	17	61	17	83.2	PIGR	1.88276e+07	6.84084e+06	1.01441e+07	3.03784e+07	2.90011e+06	5.7911e+06
High	Master Protein	P30050	Large ribosomal subunit protein uL11 OS=Homo sapiens OX=9606 GN=RPL12 PE=1 SV=1	64	8	60	8	17.8	RPL12	4.28217e+06	4.24367e+06	5.28827e+06	1.08933e+07	6.354e+06	1.56514e+07
High	Master Protein	P33993	DNA replication licensing factor MCM7 OS=Homo sapiens OX=9606 GN=MCM7 PE=1 SV=4	25	14	60	14	81.3	MCM7	4.86305e+06	4.54433e+06	6.0226e+06	2.73376e+06	1.77581e+06	2.44752e+06
High	Master Protein	P14868	Aspartate--tRNA ligase, cytoplasmic OS=Homo sapiens OX=9606 GN=DARS1 PE=1 SV=2	33	16	60	16	57.1	DARS1	1.22698e+07	9.8474e+06	1.13615e+07	3.69098e+06	3.149e+06	4.859e+06
High	Master Protein	P07195	L-lactate dehydrogenase B chain OS=Homo sapiens OX=9606 GN=LDHB PE=1 SV=2	32	10	59	9	36.6	LDHB	6.20014e+06	4.68587e+06	6.9548e+06	8.74584e+06	6.13047e+06	1.11459e+07
High	Master Protein	P26373	Large ribosomal subunit protein eL13 OS=Homo sapiens OX=9606 GN=RPL13 PE=1 SV=4	37	7	58	7	24.2	RPL13	1.16673e+07	1.07231e+07	1.99374e+07	1.1276e+07	5.84817e+06	2.03244e+07
High	Master Protein	P0C0S5	Histone H2A.Z OS=Homo sapiens OX=9606 GN=H2AZ1 PE=1 SV=2	54	6	58	4	13.5	H2AZ1	1.75044e+06	2.37278e+06	4.39433e+06	2.34285e+06	1.99468e+06	5.1782e+06
High	Master Protein	P78371	T-complex protein 1 subunit beta OS=Homo sapiens OX=9606 GN=CCT2 PE=1 SV=4	39	15	58	15	57.5	CCT2	4.27897e+06	3.84535e+06	4.60604e+06	6.65902e+06	3.678e+06	7.5161e+06
High	Master Protein	P61313	Large ribosomal subunit protein eL15 OS=Homo sapiens OX=9606 GN=RPL15 PE=1 SV=2	43	9	58	9	24.1	RPL15	5.18957e+06	5.96873e+06	1.15022e+07	1.75182e+07	9.88898e+06	2.65013e+07
High	Master Protein	P02788	Lactotransferrin OS=Homo sapiens OX=9606 GN=LTF PE=1 SV=6	23	13	58	13	78.1	LTF	7.85647e+06	3.71844e+06	7.24839e+06	6.89087e+06	2.37097e+06	5.45581e+06
High	Master Protein	P12268	Inosine-5'-monophosphate dehydrogenase 2 OS=Homo sapiens OX=9606 GN=IMPDH2 PE=1 SV=2	24	11	58	11	55.8	IMPDH2	3.9268e+06	3.12084e+06	3.74188e+06	3.38071e+06	2.46406e+06	5.07405e+06
High	Master Protein	P14866	Heterogeneous nuclear ribonucleoprotein L OS=Homo sapiens OX=9606 GN=HNRNPL PE=1 SV=2	25	11	57	11	64.1	HNRNPL	2.83918e+06	3.01315e+06	5.284e+06	8.66463e+06	3.28554e+06	1.27044e+07
High	Master Protein	P09651	Heterogeneous nuclear ribonucleoprotein A1 OS=Homo sapiens OX=9606 GN=HNRNPA1 PE=1 SV=5	27	10	57	7	38.7	HNRNPA1	1.17479e+06	1.06858e+06	2.30073e+06	3.66225e+06	1.54465e+06	6.91314e+06
High	Master Protein	P62277	Small ribosomal subunit protein uS15 OS=Homo sapiens OX=9606 GN=RPS13 PE=1 SV=2	53	9	56	9	17.2	RPS13	5.97677e+06	8.16839e+06	1.31619e+07	1.08273e+07	8.5429e+06	2.14924e+07
High	Master Protein	Q12905	Interleukin enhancer-binding factor 2 OS=Homo sapiens OX=9606 GN=ILF2 PE=1 SV=2	39	11	55	11	43	ILF2	6.85604e+06	7.30345e+06	9.08355e+06	6.53827e+06	4.34972e+06	7.33523e+06
High	Master Protein	Q99832	T-complex protein 1 subunit eta OS=Homo sapiens OX=9606 GN=CCT7 PE=1 SV=2	22	11	54	11	59.3	CCT7	5.54174e+06	4.08226e+06	4.67278e+06	6.91753e+06	4.61853e+06	8.43202e+06
High	Master Protein	Q9UNF1	Melanoma-associated antigen D2 OS=Homo sapiens OX=9606 GN=MAGED2 PE=1 SV=2	30	17	54	17	64.9	MAGED2	1.56059e+07	1.26781e+07	2.39214e+07	1.49064e+06	601752	1.71189e+06
High	Master Protein	Q96DG6	Carboxymethylenebutenolidase homolog OS=Homo sapiens OX=9606 GN=CMBL PE=1 SV=1	37	9	54	9	28	CMBL	4.45058e+06	3.61918e+06	4.73226e+06	1.3325e+07	6.88584e+06	1.6976e+07
High	Master Protein	P22314	Ubiquitin-like modifier-activating enzyme 1 OS=Homo sapiens OX=9606 GN=UBA1 PE=1 SV=3	11	10	54	10	117.8	UBA1	1.7789e+06	2.09031e+06	1.27641e+06	3.27654e+06	2.43192e+06	3.97365e+06
High	Master Protein	Q14498	RNA-binding protein 39 OS=Homo sapiens OX=9606 GN=RBM39 PE=1 SV=2	25	10	54	10	59.3	RBM39	7.53822e+06	5.85517e+06	7.22462e+06	2.54708e+06	1.76701e+06	2.69441e+06
High	Master Protein	Q00341	Vigilin OS=Homo sapiens OX=9606 GN=HDLBP PE=1 SV=2	18	21	53	21	141.4		9.71263e+06	1.24704e+07	1.04105e+07		61632	138665
High	Master Protein	Q15393	Splicing factor 3B subunit 3 OS=Homo sapiens OX=9606 GN=SF3B3 PE=1 SV=4	15	15	53	15	135.5	SF3B3	3.3411e+06	3.48338e+06	2.49354e+06	3.59595e+06	2.72744e+06	3.40397e+06
High	Master Protein	Q13162	Peroxiredoxin-4 OS=Homo sapiens OX=9606 GN=PRDX4 PE=1 SV=1	21	6	53	3	30.5	PRDX4	696015	692648	708630	833702	2.44391e+06	1.05563e+06
High	Master Protein	Q14974	Importin subunit beta-1 OS=Homo sapiens OX=9606 GN=KPNB1 PE=1 SV=2	13	9	52	9	97.1	KPNB1	2.8582e+06	2.26381e+06	3.07615e+06	2.39326e+06	1.89656e+06	2.39037e+06
High	Master Protein	O75367	Core histone macro-H2A.1 OS=Homo sapiens OX=9606 GN=MACROH2A1 PE=1 SV=5	34	9	52	7	39.2	MACROH2A1	3.86813e+06	3.42035e+06	5.16963e+06	3.5854e+06	3.39389e+06	5.67799e+06
High	Master Protein	P30041	Peroxiredoxin-6 OS=Homo sapiens OX=9606 GN=PRDX6 PE=1 SV=3	55	13	52	13	25	PRDX6	3.53578e+06	3.28852e+06	4.33293e+06	1.26069e+07	1.03657e+07	1.92305e+07
High	Master Protein	P16402	Histone H1.3 OS=Homo sapiens OX=9606 GN=H1-3 PE=1 SV=2	24	9	52	9	22.3	H1-3	1.02721e+07	8.91566e+06	1.4679e+07	1.36035e+07	1.00374e+07	2.5174e+07
High	Master Protein	P62263	Small ribosomal subunit protein uS11 OS=Homo sapiens OX=9606 GN=RPS14 PE=1 SV=3	43	9	52	9	16.3	RPS14	5.83902e+06	9.1281e+06	1.97722e+07	3.59363e+06	2.45221e+06	9.62407e+06
High	Master Protein	O00165	HCLS1-associated protein X-1 OS=Homo sapiens OX=9606 GN=HAX1 PE=1 SV=2	59	15	51	15	31.6	HAX1	1.3942e+07	1.10517e+07	1.36046e+07	525623	332832	620037
High	Master Protein	P61353	Large ribosomal subunit protein eL27 OS=Homo sapiens OX=9606 GN=RPL27 PE=1 SV=2	51	7	51	7	15.8	RPL27	2.53887e+06	4.24317e+06	7.82415e+06	7.54051e+06	6.23972e+06	1.3675e+07
High	Master Protein	P07197	Neurofilament medium polypeptide OS=Homo sapiens OX=9606 GN=NEFM PE=1 SV=3	15	13	51	9	102.4	NEFM	1.97636e+06	2.77632e+06	2.14245e+06	2.80976e+06	1.82658e+06	2.88783e+06
High	Master Protein	Q15084	Protein disulfide-isomerase A6 OS=Homo sapiens OX=9606 GN=PDIA6 PE=1 SV=1	23	9	51	9	48.1	PDIA6	1.47183e+06	1.38435e+06	1.64938e+06	3.80736e+06	2.76571e+06	6.27693e+06
High	Master Protein	Q9Y285	Phenylalanine--tRNA ligase alpha subunit OS=Homo sapiens OX=9606 GN=FARSA PE=1 SV=3	28	10	51	10	57.5	FARSA	6.33302e+06	5.21936e+06	7.03289e+06	2.47359e+06	1.31202e+06	3.0493e+06
High	Master Protein	P21333	Filamin-A OS=Homo sapiens OX=9606 GN=FLNA PE=1 SV=4	11	20	50	18	280.6	FLNA	1.48188e+06	2.11671e+06	2.57912e+06	1.61537e+06	2.96194e+06	2.35249e+06
High	Master Protein	Q04917	14-3-3 protein eta OS=Homo sapiens OX=9606 GN=YWHAH PE=1 SV=4	23	6	50	2	28.2	YWHAH	233582		310506	201765	386313	469517
High	Master Protein	Q15366	Poly(rC)-binding protein 2 OS=Homo sapiens OX=9606 GN=PCBP2 PE=1 SV=1	25	7	50	4	38.6	PCBP2	4.79538e+06	3.97534e+06	4.47932e+06	1.89499e+06	1.5083e+06	1.62347e+06
High	Master Protein	P13797	Plastin-3 OS=Homo sapiens OX=9606 GN=PLS3 PE=1 SV=4	26	13	50	13	70.8	PLS3	2.06668e+06	1.56732e+06	2.11241e+06	3.75684e+06	2.22596e+06	4.26866e+06
High	Master Protein	P31947	14-3-3 protein sigma OS=Homo sapiens OX=9606 GN=SFN PE=1 SV=1	19	5	49	1	27.8	SFN		48099.1				226443
High	Master Protein	P31327	Carbamoyl-phosphate synthase [ammonia], mitochondrial OS=Homo sapiens OX=9606 GN=CPS1 PE=1 SV=2	21	31	49	28	164.8	CPS1	304919	771231	980682	433259	4.18108e+07	293021
High	Master Protein	P06493	Cyclin-dependent kinase 1 OS=Homo sapiens OX=9606 GN=CDK1 PE=1 SV=3	40	10	49	9	34.1	CDK1	4.19526e+06	4.43971e+06	5.4035e+06	6.6865e+06	6.05797e+06	1.15016e+07
High	Master Protein	P49368	T-complex protein 1 subunit gamma OS=Homo sapiens OX=9606 GN=CCT3 PE=1 SV=4	24	11	49	11	60.5	CCT3	4.79539e+06	3.90288e+06	4.52522e+06	4.67682e+06	4.32312e+06	6.38348e+06
High	Master Protein	P63244	Small ribosomal subunit protein RACK1 OS=Homo sapiens OX=9606 GN=RACK1 PE=1 SV=3	30	11	49	11	35.1	RACK1	8.10147e+06	6.25263e+06	8.51385e+06	7.3853e+06	4.57809e+06	8.69407e+06
High	Master Protein	Q9NZI8	Insulin-like growth factor 2 mRNA-binding protein 1 OS=Homo sapiens OX=9606 GN=IGF2BP1 PE=1 SV=2	29	14	47	12	63.4	IGF2BP1	1.52148e+06	1.30373e+06	3.18163e+06	4.2137e+06	2.03914e+06	6.34594e+06
High	Master Protein	P62266	Small ribosomal subunit protein uS12 OS=Homo sapiens OX=9606 GN=RPS23 PE=1 SV=3	29	5	47	5	15.8	RPS23	5.76539e+06	6.03745e+06	1.28486e+07	5.27787e+06	3.48382e+06	8.93557e+06
High	Master Protein	P54136	Arginine--tRNA ligase, cytoplasmic OS=Homo sapiens OX=9606 GN=RARS1 PE=1 SV=2	26	17	47	17	75.3	RARS1	6523224	5.5832e+06	7.6786e+06	2.70251e+06	2.14911e+06	2.94965e+06
High	Master Protein	P38919	Eukaryotic initiation factor 4A-III OS=Homo sapiens OX=9606 GN=EIF4A3 PE=1 SV=4	27	12	47	11	46.8	EIF4A3	2.46933e+06	1.96011e+06	2.7084e+06	4.98263e+06	3.44511e+06	6.53762e+06
High	Master Protein	P22087	rRNA 2'-O-methyltransferase fibrillarin OS=Homo sapiens OX=9606 GN=FBL PE=1 SV=2	30	9	47	9	33.8	FBL	5.31213e+06	4.86899e+06	8.96261e+06	6.07332e+06	3.32099e+06	8.56504e+06
High	Master Protein	P60866	Small ribosomal subunit protein uS10 OS=Homo sapiens OX=9606 GN=RPS20 PE=1 SV=1	25	3	46	3	13.4	RPS20	8.81095e+06	1.2274e+07	2.07312e+07	7.08832e+06	5.09756e+06	1.32023e+07
High	Master Protein	Q02543	Large ribosomal subunit protein eL20 OS=Homo sapiens OX=9606 GN=RPL18A PE=1 SV=2	33	7	46	7	20.7	RPL18A	7.45678e+06	5.87697e+06	1.16217e+07	1.84659e+07	8.81117e+06	2.04015e+07
High	Master Protein	P35579	Myosin-9 OS=Homo sapiens OX=9606 GN=MYH9 PE=1 SV=4	13	22	46	18	226.4	MYH9	1.26518e+06	2.87047e+06	2.66537e+06	3.48217e+06	9.38338e+06	7.08694e+06
High	Master Protein	P60891	Ribose-phosphate pyrophosphokinase 1 OS=Homo sapiens OX=9606 GN=PRPS1 PE=1 SV=2	23	8	46	8	34.8	PRPS1	3.7602e+06	2.83927e+06	4.73121e+06	3.26223e+06	2.54539e+06	4.43467e+06
High	Master Protein	Q8IUE6	Histone H2A type 2-B OS=Homo sapiens OX=9606 GN=H2AC21 PE=1 SV=3	41	6	45	3	14	H2AC21	833566	1.07546e+06	3.31364e+06	1.38617e+06	897533	3.39164e+06
High	Master Protein	P50914	Large ribosomal subunit protein eL14 OS=Homo sapiens OX=9606 GN=RPL14 PE=1 SV=4	27	7	45	7	23.4	RPL14	5.65741e+06	4.96323e+06	5.1656e+06	9.41344e+06	6.51426e+06	1.39371e+07
High	Master Protein	Q13263	Transcription intermediary factor 1-beta OS=Homo sapiens OX=9606 GN=TRIM28 PE=1 SV=5	17	13	45	13	88.5	TRIM28	5.97944e+06	5.75719e+06	8.08452e+06	2.50997e+06	1.29431e+06	2.49153e+06
High	Master Protein	P46779	Large ribosomal subunit protein eL28 OS=Homo sapiens OX=9606 GN=RPL28 PE=1 SV=3	50	9	45	9	15.7	RPL28	1.19184e+07	1.23683e+07	2.61127e+07	1.07186e+07	5.72065e+06	1.71241e+07
High	Master Protein	P06576	ATP synthase subunit beta, mitochondrial OS=Homo sapiens OX=9606 GN=ATP5F1B PE=1 SV=3	36	16	45	16	56.5	ATP5F1B	2.60871e+06	2.29113e+06	1.96458e+06	2.12093e+06	9.99339e+06	2.39489e+06
High	Master Protein	P08708	Small ribosomal subunit protein eS17 OS=Homo sapiens OX=9606 GN=RPS17 PE=1 SV=2	65	8	45	8	15.5	RPS17	4.30495e+06	4.68425e+06	9.45113e+06	3.06155e+06	1.51468e+06	5697822
High	Master Protein	Q15029	116 kDa U5 small nuclear ribonucleoprotein component OS=Homo sapiens OX=9606 GN=EFTUD2 PE=1 SV=1	16	13	45	12	109.4	EFTUD2	2.95436e+06	2.92807e+06	3.78598e+06	2.30936e+06	1.11055e+06	2.49765e+06
High	Master Protein	P62995	Transformer-2 protein homolog beta OS=Homo sapiens OX=9606 GN=TRA2B PE=1 SV=1	24	7	45	6	33.6	TRA2B	1.04549e+06	948837	1.84568e+06	8.92053e+06	5.36429e+06	1.22365e+07
High	Master Protein	O75534	Cold shock domain-containing protein E1 OS=Homo sapiens OX=9606 GN=CSDE1 PE=1 SV=2	21	17	44	17	88.8	CSDE1	5.31183e+06	4.94794e+06	9.79149e+06	1.81838e+06	1.66423e+06	3.16718e+06
High	Master Protein	P62753	Small ribosomal subunit protein eS6 OS=Homo sapiens OX=9606 GN=RPS6 PE=1 SV=1	33	8	44	8	28.7	RPS6	5.4632e+06	4.45555e+06	1.0704e+07	1.07495e+07	4.22928e+06	1.73478e+07
High	Master Protein	P06702	Protein S100-A9 OS=Homo sapiens OX=9606 GN=S100A9 PE=1 SV=1	67	8	44	8	13.2	S100A9	1.69683e+06	1.12977e+06	4.48907e+06	2.6793e+06	3.16906e+06	2.00651e+07
High	Master Protein	P31689	DnaJ homolog subfamily A member 1 OS=Homo sapiens OX=9606 GN=DNAJA1 PE=1 SV=2	30	8	44	8	44.8	DNAJA1	7.19574e+06	5.8259e+06	9.28838e+06	1.39291e+06	784078	2.53097e+06
High	Master Protein	P36542	ATP synthase subunit gamma, mitochondrial OS=Homo sapiens OX=9606 GN=ATP5F1C PE=1 SV=1	31	10	44	10	33	ATP5F1C	6.95066e+06	6.09796e+06	8.52945e+06	2.71223e+06	2.79333e+06	3.66477e+06
High	Master Protein	P22392	Nucleoside diphosphate kinase B OS=Homo sapiens OX=9606 GN=NME2 PE=1 SV=1	44	7	44	2	17.3	NME2	7.35238e+06	8.94004e+06	1.30558e+07	3.84644e+06	5.22792e+06	6.78512e+06
High	Master Protein	P08865	Small ribosomal subunit protein uS2 OS=Homo sapiens OX=9606 GN=RPSA PE=1 SV=4	32	7	43	7	32.8	RPSA	7.45922e+06	6.2209e+06	7.03309e+06	4.52979e+06	5.04095e+06	5.19854e+06
High	Master Protein	P05089	Arginase-1 OS=Homo sapiens OX=9606 GN=ARG1 PE=1 SV=2	28	8	43	8	34.7	ARG1	1.40835e+06	503068	2340386	1.50857e+06	4.06312e+06	9.1554e+06
High	Master Protein	P60660	Myosin light polypeptide 6 OS=Homo sapiens OX=9606 GN=MYL6 PE=1 SV=2	58	8	43	8	16.9	MYL6	4.93774e+06	5.38361e+06	5.40386e+06	7.15645e+06	9.3769e+06	7.76462e+06
High	Master Protein	Q8IXB1	DnaJ homolog subfamily C member 10 OS=Homo sapiens OX=9606 GN=DNAJC10 PE=1 SV=2	16	10	43	10	91	DNAJC10	785030	851805	1.08001e+06	3.33762e+06	2.5945e+06	5.04086e+06
High	Master Protein	P62826	GTP-binding nuclear protein Ran OS=Homo sapiens OX=9606 GN=RAN PE=1 SV=3	37	7	43	7	24.4	RAN	2.52252e+06	1.76155e+06	4.12625e+06	5.16648e+06	3.29325e+06	7.94293e+06
High	Master Protein	P62244	Small ribosomal subunit protein uS8 OS=Homo sapiens OX=9606 GN=RPS15A PE=1 SV=2	44	6	43	6	14.8	RPS15A	4.90786e+06	8.19219e+06	9.02053e+06	1.52603e+07	8.64449e+06	2.01967e+07
High	Master Protein	P18077	Large ribosomal subunit protein eL33 OS=Homo sapiens OX=9606 GN=RPL35A PE=1 SV=2	39	6	42	6	12.5	RPL35A	2.50263e+06	4.46005e+06	6.47386e+06	7.05062e+06	6.62772e+06	1.08009e+07
High	Master Protein	P09874	Poly [ADP-ribose] polymerase 1 OS=Homo sapiens OX=9606 GN=PARP1 PE=1 SV=4	13	10	42	10	113	PARP1	3.24396e+06	3.05593e+06	3.96782e+06	3.31305e+06	1.89947e+06	4.99653e+06
High	Master Protein	P07355	Annexin A2 OS=Homo sapiens OX=9606 GN=ANXA2 PE=1 SV=2	35	11	42	11	38.6	ANXA2	2.67097e+06	2.88443e+06	4.83127e+06	2.17421e+06	4.14481e+06	8.37066e+06
High	Master Protein	P02545	Prelamin-A/C OS=Homo sapiens OX=9606 GN=LMNA PE=1 SV=1	20	13	41	12	74.1	LMNA	930735	415353	629715	3.4808e+06	2.69704e+06	4.4101e+06
High	Master Protein	P67809	Y-box-binding protein 1 OS=Homo sapiens OX=9606 GN=YBX1 PE=1 SV=3	54	11	41	7	35.9	YBX1	947441	877887	1.60499e+06	2.25073e+06	897043	5.49232e+06
High	Master Protein	P51991	Heterogeneous nuclear ribonucleoprotein A3 OS=Homo sapiens OX=9606 GN=HNRNPA3 PE=1 SV=2	20	7	40	5	39.6	HNRNPA3	1.32686e+06	981887	2.36976e+06	3.57362e+06	2.07901e+06	5.81298e+06
High	Master Protein	Q5D862	Filaggrin-2 OS=Homo sapiens OX=9606 GN=FLG2 PE=1 SV=1	9	9	40	9	247.9	FLG2	2.00122e+06	1.08778e+06	2.54448e+06	1.00783e+06	2.00334e+06	1.11721e+07
High	Master Protein	Q00325	Solute carrier family 25 member 3 OS=Homo sapiens OX=9606 GN=SLC25A3 PE=1 SV=2	21	8	40	8	40.1	SLC25A3	6.43117e+06	5.60077e+06	7.4141e+06	2.9948e+06	2.46858e+06	3.72541e+06
High	Master Protein	Q9Y230	RuvB-like 2 OS=Homo sapiens OX=9606 GN=RUVBL2 PE=1 SV=3	27	10	39	10	51.1	RUVBL2	5.66437e+06	4.52036e+06	4.7855e+06	2.5442e+06	2.30765e+06	3.29893e+06
High	Master Protein	Q16531	DNA damage-binding protein 1 OS=Homo sapiens OX=9606 GN=DDB1 PE=1 SV=1	16	17	39	17	126.9	DDB1	5.4421e+06	5.32398e+06	4.12318e+06	4.08776e+06	3.25742e+06	4.88251e+06
High	Master Protein	P62829	Large ribosomal subunit protein uL14 OS=Homo sapiens OX=9606 GN=RPL23 PE=1 SV=1	56	8	39	8	14.9	RPL23	1.11531e+07	1.6368e+07	2.37985e+07	3.40509e+06	2.70308e+06	5.33964e+06
High	Master Protein	Q99623	Prohibitin-2 OS=Homo sapiens OX=9606 GN=PHB2 PE=1 SV=2	46	12	39	12	33.3	PHB2	6.21881e+06	5.04324e+06	6.04096e+06	1.08006e+06	2.09618e+06	889427
High	Master Protein	Q8TDL5	BPI fold-containing family B member 1 OS=Homo sapiens OX=9606 GN=BPIFB1 PE=1 SV=1	28	12	39	12	52.4	BPIFB1	7.2162e+06	4.03214e+06	5.01925e+06	7.03564e+06	3.78142e+06	6.92516e+06
High	Master Protein	Q6DN03	Putative histone H2B type 2-C OS=Homo sapiens OX=9606 GN=H2BC20P PE=5 SV=3	20	5	38	1	21.5	H2BC20P	159630	140108	162382		137124	57898.5
High	Master Protein	P07196	Neurofilament light polypeptide OS=Homo sapiens OX=9606 GN=NEFL PE=1 SV=3	15	9	38	6	61.5	NEFL	774634	1.00298e+06	1.38068e+06	939256	252817	1.14634e+06
High	Master Protein	P62913	Large ribosomal subunit protein uL5 OS=Homo sapiens OX=9606 GN=RPL11 PE=1 SV=2	26	6	38	6	20.2	RPL11	7.51528e+06	7.94085e+06	1.2669e+07	9.51778e+06	4.93148e+06	1.45e+07
High	Master Protein	Q9Y265	RuvB-like 1 OS=Homo sapiens OX=9606 GN=RUVBL1 PE=1 SV=1	23	8	38	8	50.2	RUVBL1	3.14527e+06	2.66848e+06	2940484	1.55416e+06	799361	2.27306e+06
High	Master Protein	P01877	Immunoglobulin heavy constant alpha 2 OS=Homo sapiens OX=9606 GN=IGHA2 PE=1 SV=5	22	8	37	2	42.3	IGHA2	1.5106e+06	386766	835045	2.87004e+06		644942
High	Master Protein	P68871	Hemoglobin subunit beta OS=Homo sapiens OX=9606 GN=HBB PE=1 SV=2	29	4	37	4	16	HBB	158362	4.06078e+06	681009	3.38576e+07	9.987e+08	1.98295e+07
High	Master Protein	P45880	Voltage-dependent anion-selective channel protein 2 OS=Homo sapiens OX=9606 GN=VDAC2 PE=1 SV=2	39	8	37	8	31.5	VDAC2	6.92752e+06	5.91861e+06	8.57372e+06	1.18108e+06	1.3025e+06	1.57952e+06
High	Master Protein	Q12906	Interleukin enhancer-binding factor 3 OS=Homo sapiens OX=9606 GN=ILF3 PE=1 SV=3	15	12	36	12	95.3	ILF3	1.77209e+06	1.7698e+06	3.89399e+06	3.67605e+06	2.09752e+06	6.39026e+06
High	Master Protein	P11388	DNA topoisomerase 2-alpha OS=Homo sapiens OX=9606 GN=TOP2A PE=1 SV=3	9	13	36	9	174.3	TOP2A	1.5957e+06	2.56231e+06	2.17517e+06	1.72113e+06	1.02547e+06	1.69874e+06
High	Master Protein	P14625	Endoplasmin OS=Homo sapiens OX=9606 GN=HSP90B1 PE=1 SV=1	10	9	36	7	92.4	HSP90B1	180640	211281	184526	405520	1.35101e+06	417937
High	Master Protein	P35580	Myosin-10 OS=Homo sapiens OX=9606 GN=MYH10 PE=1 SV=3	4	9	36	5	228.9	MYH10	275540	674376	576737	602190	1.14059e+06	1.52936e+06
High	Master Protein	P33992	DNA replication licensing factor MCM5 OS=Homo sapiens OX=9606 GN=MCM5 PE=1 SV=5	17	10	36	10	82.2	MCM5	3.69705e+06	3.42903e+06	4314377	2.2253e+06	1.67597e+06	2.42971e+06
High	Master Protein	P05023	Sodium/potassium-transporting ATPase subunit alpha-1 OS=Homo sapiens OX=9606 GN=ATP1A1 PE=1 SV=1	14	11	36	11	112.8	ATP1A1	3.61833e+06	3.45062e+06	2.32214e+06	1.31905e+06	2.88905e+06	729254
High	Master Protein	P61626	Lysozyme C OS=Homo sapiens OX=9606 GN=LYZ PE=1 SV=1	29	5	36	5	16.5	LYZ	4.38168e+06	4.8288e+06	5.48125e+06	9.65792e+06	4.77562e+06	1.68936e+07
High	Master Protein	O00567	Nucleolar protein 56 OS=Homo sapiens OX=9606 GN=NOP56 PE=1 SV=4	21	10	36	10	66	NOP56	4.63021e+06	4.81736e+06	6.62033e+06	4.32875e+06	3.02376e+06	6.25724e+06
High	Master Protein	P47897	Glutamine--tRNA ligase OS=Homo sapiens OX=9606 GN=QARS1 PE=1 SV=1	19	13	35	13	87.7	QARS1	4.78533e+06	5.1216e+06	6.5636e+06	787643	652724	1.11721e+06
High	Master Protein	P31942	Heterogeneous nuclear ribonucleoprotein H3 OS=Homo sapiens OX=9606 GN=HNRNPH3 PE=1 SV=2	17	5	35	4	36.9	HNRNPH3	1.3756e+06	1.12147e+06	2.05968e+06	2.35576e+06	1.26082e+06	2339982
High	Master Protein	P61254	Large ribosomal subunit protein uL24 OS=Homo sapiens OX=9606 GN=RPL26 PE=1 SV=1	45	9	35	9	17.2	RPL26	1.77229e+06	1.61377e+06	3.61925e+06	3.44224e+06	1.78759e+06	7.32001e+06
High	Master Protein	P06733	Alpha-enolase OS=Homo sapiens OX=9606 GN=ENO1 PE=1 SV=2	26	10	35	9	47.1	ENO1	2.7256e+06	1.94005e+06	3.83746e+06	4.66442e+06	4.73172e+06	7.95379e+06
High	Master Protein	P53621	Coatomer subunit alpha OS=Homo sapiens OX=9606 GN=COPA PE=1 SV=2	14	15	35	15	138.3	COPA	4.60288e+06	5.70125e+06	3.89451e+06	771996	668593	504195
High	Master Protein	P12273	Prolactin-inducible protein OS=Homo sapiens OX=9606 GN=PIP PE=1 SV=1	49	5	34	5	16.6	PIP	1.81317e+06	917703	1.19361e+06	1.26812e+06	1.41036e+06	4.40285e+06
High	Master Protein	P40429	Large ribosomal subunit protein uL13 OS=Homo sapiens OX=9606 GN=RPL13A PE=1 SV=2	26	7	34	7	23.6	RPL13A	921177	1.61019e+06	5.08105e+06	9.06575e+06	4.05101e+06	1.70625e+07
High	Master Protein	P07814	Bifunctional glutamate/proline--tRNA ligase OS=Homo sapiens OX=9606 GN=EPRS1 PE=1 SV=5	8	11	34	11	170.5	EPRS1	5.2824e+06	6.19242e+06	5.96677e+06	1.96345e+06	1.37083e+06	2.10884e+06
High	Master Protein	P83731	Large ribosomal subunit protein eL24 OS=Homo sapiens OX=9606 GN=RPL24 PE=1 SV=1	30	5	34	5	17.8	RPL24	5.23706e+06	5.43652e+06	1.14123e+07	3.4246e+06	1.99201e+06	6.25497e+06
High	Master Protein	P31025	Lipocalin-1 OS=Homo sapiens OX=9606 GN=LCN1 PE=1 SV=1	21	4	33	4	19.2	LCN1	7.46707e+06	4.77017e+06	5.18937e+06	3.61206e+06	2.12629e+06	6.40098e+06
High	Master Protein	O75746	Electrogenic aspartate/glutamate antiporter SLC25A12, mitochondrial OS=Homo sapiens OX=9606 GN=SLC25A12 PE=1 SV=2	13	9	33	3	74.7	SLC25A12	1.05219e+06	713914	685274
High	Master Protein	P04792	Heat shock protein beta-1 OS=Homo sapiens OX=9606 GN=HSPB1 PE=1 SV=2	44	8	32	8	22.8	HSPB1	1.09652e+07	8.98842e+06	1.15807e+07	1.18635e+06	841231	1.02034e+06
High	Master Protein	P30153	Serine/threonine-protein phosphatase 2A 65 kDa regulatory subunit A alpha isoform OS=Homo sapiens OX=9606 GN=PPP2R1A PE=1 SV=4	20	9	32	9	65.3	PPP2R1A	3.27405e+06	2.46691e+06	3.07622e+06	2.24536e+06	1.66366e+06	2.55318e+06
High	Master Protein	O60506	Heterogeneous nuclear ribonucleoprotein Q OS=Homo sapiens OX=9606 GN=SYNCRIP PE=1 SV=2	12	7	32	4	69.6	SYNCRIP	1.13468e+06	1.33332e+06	1.3457e+06	2.43424e+06	1.24061e+06	2.98431e+06
High	Master Protein	Q92945	Far upstream element-binding protein 2 OS=Homo sapiens OX=9606 GN=KHSRP PE=1 SV=4	13	7	32	7	73.1	KHSRP	1.41653e+06	1.20787e+06	2.06955e+06	2.64385e+06	1.74382e+06	4.32351e+06
High	Master Protein	Q08554	Desmocollin-1 OS=Homo sapiens OX=9606 GN=DSC1 PE=1 SV=2	8	7	32	7	99.9	DSC1	2.52084e+06	1.32547e+06	2.61463e+06	1.74925e+06	3.60137e+06	1.20555e+07
High	Master Protein	P81605	Dermcidin OS=Homo sapiens OX=9606 GN=DCD PE=1 SV=2	43	5	31	5	11.3	DCD	4.92127e+06	3.22989e+06	4.19958e+06	5.40174e+06	7.55961e+06	3.86473e+07
High	Master Protein	Q9UKM9	RNA-binding protein Raly OS=Homo sapiens OX=9606 GN=RALY PE=1 SV=1	15	5	31	5	32.4	RALY	1.39698e+06	1.27531e+06	1.92186e+06	2.21447e+06	1.56037e+06	3.09143e+06
High	Master Protein	P05387	Large ribosomal subunit protein P2 OS=Homo sapiens OX=9606 GN=RPLP2 PE=1 SV=1	48	4	31	4	11.7	RPLP2	2.60362e+06	3.23081e+06	2.83181e+06	5.17853e+06	3.47583e+06	9392204
High	Master Protein	Q16352	Alpha-internexin OS=Homo sapiens OX=9606 GN=INA PE=1 SV=2	12	7	30	3	55.4	INA	187079	169759	131921	133385	143637
High	Master Protein	P62854	Small ribosomal subunit protein eS26 OS=Homo sapiens OX=9606 GN=RPS26 PE=1 SV=3	40	4	30	4	13	RPS26	629212	774208	2.23185e+06	1.19876e+06	964566	2.51769e+06
High	Master Protein	Q92598	Heat shock protein 105 kDa OS=Homo sapiens OX=9606 GN=HSPH1 PE=1 SV=1	17	11	30	10	96.8	HSPH1	2.79175e+06	3.07825e+06	3.80069e+06	521852	943446	1.81778e+06
High	Master Protein	P10599	Thioredoxin OS=Homo sapiens OX=9606 GN=TXN PE=1 SV=3	43	5	30	5	11.7	TXN	2.33386e+06	2.37521e+06	4.24741e+06	3.42219e+06	3.05576e+06	1.27976e+07
High	Master Protein	Q15233	Non-POU domain-containing octamer-binding protein OS=Homo sapiens OX=9606 GN=NONO PE=1 SV=4	24	10	30	9	54.2	NONO	3.83578e+06	3.12337e+06	4.93366e+06	3.86297e+06	2.29745e+06	4.99617e+06
High	Master Protein	Q15717	ELAV-like protein 1 OS=Homo sapiens OX=9606 GN=ELAVL1 PE=1 SV=2	25	7	30	7	36.1	ELAVL1	3.13619e+06	2.2482e+06	3.80347e+06	2.93323e+06	1.66872e+06	3.94015e+06
High	Master Protein	Q15750	TGF-beta-activated kinase 1 and MAP3K7-binding protein 1 OS=Homo sapiens OX=9606 GN=TAB1 PE=1 SV=1	28	11	29	11	54.6	TAB1	4.71885e+06	3.61648e+06	4.4525e+06	1.19324e+06	194171	1.82195e+06
High	Master Protein	O95831	Apoptosis-inducing factor 1, mitochondrial OS=Homo sapiens OX=9606 GN=AIFM1 PE=1 SV=1	20	11	29	11	66.9	AIFM1	4.64043e+06	3.34239e+06	5.38604e+06	405468	198643	441757
High	Master Protein	O76021	Ribosomal L1 domain-containing protein 1 OS=Homo sapiens OX=9606 GN=RSL1D1 PE=1 SV=3	11	8	29	8	54.9	RSL1D1	543413	655904	1.51875e+06	1.42153e+06	480441	2.18569e+06
High	Master Protein	P62888	Large ribosomal subunit protein eL30 OS=Homo sapiens OX=9606 GN=RPL30 PE=1 SV=2	56	5	29	5	12.8	RPL30	1.18393e+06	1.32518e+06	1.61534e+06	2.29555e+06	1.64686e+06	3.74529e+06
High	Master Protein	Q14103	Heterogeneous nuclear ribonucleoprotein D0 OS=Homo sapiens OX=9606 GN=HNRNPD PE=1 SV=1	19	6	29	4	38.4	HNRNPD	1.95883e+06	1.53932e+06	2.73389e+06	2.82572e+06	1.57978e+06	4.44794e+06
High	Master Protein	Q9NP55	BPI fold-containing family A member 1 OS=Homo sapiens OX=9606 GN=BPIFA1 PE=1 SV=1	27	5	28	5	26.7	BPIFA1	1.94039e+06	1.5913e+06	2.26357e+06	1.94943e+06	1.54549e+06	3.47879e+06
High	Master Protein	Q16576	Histone-binding protein RBBP7 OS=Homo sapiens OX=9606 GN=RBBP7 PE=1 SV=1	24	10	28	10	47.8	RBBP7	5.93764e+06	4.3373e+06	6.69586e+06	3.36374e+06	1.82459e+06	4.36327e+06
High	Master Protein	Q9Y2X3	Nucleolar protein 58 OS=Homo sapiens OX=9606 GN=NOP58 PE=1 SV=1	13	5	28	5	59.5	NOP58	2.29989e+06	1.94111e+06	2.69168e+06	2.1591e+06	1.19532e+06	2.56831e+06
High	Master Protein	O43390	Heterogeneous nuclear ribonucleoprotein R OS=Homo sapiens OX=9606 GN=HNRNPR PE=1 SV=1	8	5	28	2	70.9	HNRNPR	362551	375725	516801	452900	371251	281640
High	Master Protein	P50402	Emerin OS=Homo sapiens OX=9606 GN=EMD PE=1 SV=1	31	8	28	8	29	EMD	5.49894e+06	4.81366e+06	7.90739e+06	2.12248e+06	977099	3.17741e+06
High	Master Protein	Q14257	Reticulocalbin-2 OS=Homo sapiens OX=9606 GN=RCN2 PE=1 SV=1	35	8	28	8	36.9	RCN2	4.64761e+06	3.3579e+06	4.4349e+06	875279	371349	864400
High	Master Protein	P18621	Large ribosomal subunit protein uL22 OS=Homo sapiens OX=9606 GN=RPL17 PE=1 SV=3	37	7	28	7	21.4	RPL17	2.16117e+06	1.53422e+06	4.16252e+06	3.98383e+06	1.2183e+06	7.54348e+06
High	Master Protein	Q6P2Q9	Pre-mRNA-processing-splicing factor 8 OS=Homo sapiens OX=9606 GN=PRPF8 PE=1 SV=2	7	15	28	15	273.4	PRPF8	1.11842e+06	1.51168e+06	1.61675e+06	374112	994154	602473
High	Master Protein	P84103	Serine/arginine-rich splicing factor 3 OS=Homo sapiens OX=9606 GN=SRSF3 PE=1 SV=1	18	4	28	3	19.3	SRSF3	1.98924e+06	2.13294e+06	2.11441e+06	2.71936e+06	2.65475e+06	4.82379e+06
High	Master Protein	O43852	Calumenin OS=Homo sapiens OX=9606 GN=CALU PE=1 SV=2	29	8	28	8	37.1	CALU	3.21419e+06	2.86165e+06	3.57762e+06	1.32832e+06	851642	1.53913e+06
High	Master Protein	Q9BVI4	Nucleolar complex protein 4 homolog OS=Homo sapiens OX=9606 GN=NOC4L PE=1 SV=1	24	8	27	8	58.4	NOC4L	867513	838659	872898	2.70571e+06	1.58924e+06	3.38951e+06
High	Master Protein	Q5JWF2	Guanine nucleotide-binding protein G(s) subunit alpha isoforms XLas OS=Homo sapiens OX=9606 GN=GNAS PE=1 SV=2	8	8	27	7	111	GNAS	3.87371e+06	3.59438e+06	3.64646e+06	552365	560265	798260
High	Master Protein	P22102	Trifunctional purine biosynthetic protein adenosine-3 OS=Homo sapiens OX=9606 GN=GART PE=1 SV=1	12	10	27	10	107.7	GART	2.13134e+06	2.03205e+06	2.20819e+06	2.47999e+06	1.21702e+06	2.84643e+06
High	Master Protein	Q7L2E3	ATP-dependent RNA helicase DHX30 OS=Homo sapiens OX=9606 GN=DHX30 PE=1 SV=1	8	8	27	8	133.9	DHX30	1.53623e+06	1.70643e+06	1.19947e+06	1.73683e+06	2.03566e+06	1.7223e+06
High	Master Protein	P30101	Protein disulfide-isomerase A3 OS=Homo sapiens OX=9606 GN=PDIA3 PE=1 SV=4	20	11	27	11	56.7	PDIA3	680121	217468	1.0428e+06	2.05772e+06	2.34467e+06	3.10066e+06
High	Master Protein	P23246	Splicing factor, proline- and glutamine-rich OS=Homo sapiens OX=9606 GN=SFPQ PE=1 SV=2	14	8	27	7	76.1	SFPQ	966690	861652	1.2247e+06	1.24324e+06	949136	1.55902e+06
High	Master Protein	Q13247	Serine/arginine-rich splicing factor 6 OS=Homo sapiens OX=9606 GN=SRSF6 PE=1 SV=2	16	7	27	7	39.6	SRSF6	2.45402e+06	2.34622e+06	2.23485e+06	8.63506e+06	6.18129e+06	1.16321e+07
High	Master Protein	P00338	L-lactate dehydrogenase A chain OS=Homo sapiens OX=9606 GN=LDHA PE=1 SV=2	16	5	27	4	36.7	LDHA	2.80999e+06	2.23873e+06	2.78196e+06	3.26428e+06	5.20034e+06	3.68873e+06
High	Master Protein	P25205	DNA replication licensing factor MCM3 OS=Homo sapiens OX=9606 GN=MCM3 PE=1 SV=3	14	9	26	9	90.9	MCM3	1.40212e+06	1.32159e+06	1.20765e+06	745406	451727	1.60783e+06
High	Master Protein	P48643	T-complex protein 1 subunit epsilon OS=Homo sapiens OX=9606 GN=CCT5 PE=1 SV=1	12	6	26	5	59.6	CCT5	1.62785e+06	1.85794e+06	1.87428e+06	2.31321e+06	1.42235e+06	3.35743e+06
High	Master Protein	Q13561	Dynactin subunit 2 OS=Homo sapiens OX=9606 GN=DCTN2 PE=1 SV=4	13	5	25	5	44.2	DCTN2	95890.4	80462.2		1.25832e+06	491819	1.60243e+06
High	Master Protein	Q9BQA1	Methylosome protein WDR77 OS=Homo sapiens OX=9606 GN=WDR77 PE=1 SV=1	25	6	25	6	36.7	WDR77	4.06022e+06	4.19386e+06	4.48087e+06	7.55009e+06	7.725e+06	7.47583e+06
High	Master Protein	P05109	Protein S100-A8 OS=Homo sapiens OX=9606 GN=S100A8 PE=1 SV=1	60	8	25	8	10.8	S100A8	1.30433e+06	1.26663e+06	4.75734e+06	2.76014e+06	2.24846e+06	1.57552e+07
High	Master Protein	P84098	Large ribosomal subunit protein eL19 OS=Homo sapiens OX=9606 GN=RPL19 PE=1 SV=1	22	4	25	4	23.5	RPL19	2.26236e+06	2.17121e+06	5.21856e+06	5.30925e+06	2.3232e+06	9.47348e+06
High	Master Protein	Q96P63	Serpin B12 OS=Homo sapiens OX=9606 GN=SERPINB12 PE=1 SV=1	15	6	25	6	46.2	SERPINB12	1.26575e+06	853812	1.29816e+06	497199	1.11981e+06	4.99767e+06
High	Master Protein	P04075	Fructose-bisphosphate aldolase A OS=Homo sapiens OX=9606 GN=ALDOA PE=1 SV=2	20	8	24	7	39.4	ALDOA	1.8655e+06	1.62596e+06	2.48288e+06	2.20179e+06	6.92358e+06	3.51086e+06
High	Master Protein	P31944	Caspase-14 OS=Homo sapiens OX=9606 GN=CASP14 PE=1 SV=2	62	16	24	16	27.7	CASP14	520682	283147	501590	349724	921191	1.11565e+07
High	Master Protein	P29508	Serpin B3 OS=Homo sapiens OX=9606 GN=SERPINB3 PE=1 SV=2	16	7	24	1	44.5	SERPINB3	1.33822e+06	695839	1.57823e+06	952883	1.00973e+06	3.82831e+06
High	Master Protein	Q99615	DnaJ homolog subfamily C member 7 OS=Homo sapiens OX=9606 GN=DNAJC7 PE=1 SV=2	13	7	24	7	56.4	DNAJC7	3.25969e+06	2.58104e+06	2.87512e+06	944843	344606	895590
High	Master Protein	P01834	Immunoglobulin kappa constant OS=Homo sapiens OX=9606 GN=IGKC PE=1 SV=2	66	4	24	4	11.8	IGKC	1.64751e+06	481841	1.46248e+06	4.93836e+06		1.52365e+06
High	Master Protein	Q13242	Serine/arginine-rich splicing factor 9 OS=Homo sapiens OX=9606 GN=SRSF9 PE=1 SV=1	39	9	24	9	25.5	SRSF9	1.36735e+06	1.18735e+06	1.31205e+06	2.96223e+06	938869	5.19897e+06
High	Master Protein	P46778	Large ribosomal subunit protein eL21 OS=Homo sapiens OX=9606 GN=RPL21 PE=1 SV=2	33	5	24	5	18.6	RPL21	3.45397e+06	2.96134e+06	6.54196e+06	5.82137e+06	2.13379e+07	8.37178e+06
High	Master Protein	P62750	Large ribosomal subunit protein uL23 OS=Homo sapiens OX=9606 GN=RPL23A PE=1 SV=1	28	5	24	5	17.7	RPL23A	2.91465e+06	2.73087e+06	4.2216e+06	5.94561e+06	3.34108e+06	1.11043e+07
High	Master Protein	Q08188	Protein-glutamine gamma-glutamyltransferase E OS=Homo sapiens OX=9606 GN=TGM3 PE=1 SV=4	17	10	23	10	76.6	TGM3	915397	926623	1.40511e+06	1.56332e+06	984492	7.04192e+06
High	Master Protein	P18085	ADP-ribosylation factor 4 OS=Homo sapiens OX=9606 GN=ARF4 PE=1 SV=3	43	6	23	3	20.5	ARF4	1.1336e+06	1.05027e+06	756919	1.13013e+06	1.76901e+06	922484
High	Master Protein	Q13595	Transformer-2 protein homolog alpha OS=Homo sapiens OX=9606 GN=TRA2A PE=1 SV=1	15	5	23	4	32.7	TRA2A	386451	336407	522686	2.63668e+06	1.62737e+06	3.56157e+06
High	Master Protein	O95816	BAG family molecular chaperone regulator 2 OS=Homo sapiens OX=9606 GN=BAG2 PE=1 SV=1	39	7	23	7	23.8	BAG2	5.54044e+06	4915122	6.71071e+06	558370	452527	905658
High	Master Protein	P12004	Proliferating cell nuclear antigen OS=Homo sapiens OX=9606 GN=PCNA PE=1 SV=1	27	7	23	7	28.8	PCNA	4.04418e+06	3.94532e+06	4.62784e+06	1.78189e+06	720396	1.97085e+06
High	Master Protein	P30876	DNA-directed RNA polymerase II subunit RPB2 OS=Homo sapiens OX=9606 GN=POLR2B PE=1 SV=1	10	10	23	10	133.8	POLR2B	1.76618e+06	1.90768e+06	2.07757e+06	315769	340417	632861
High	Master Protein	P01591	Immunoglobulin J chain OS=Homo sapiens OX=9606 GN=JCHAIN PE=1 SV=4	23	4	23	4	18.1	JCHAIN	6.86319e+06	1.89951e+06	3.07199e+06	1.11128e+07	633234	2.22631e+06
High	Master Protein	Q8N1F7	Nuclear pore complex protein Nup93 OS=Homo sapiens OX=9606 GN=NUP93 PE=1 SV=2	16	11	23	11	93.4	NUP93	4.54146e+06	4.06546e+06	5.04466e+06	1.56056e+06	909664	2.12234e+06
High	Master Protein	P61204	ADP-ribosylation factor 3 OS=Homo sapiens OX=9606 GN=ARF3 PE=1 SV=2	39	6	22	2	20.6	ARF3	1.26855e+06	1.25887e+06	2.20596e+06	1.59614e+06	1.95948e+06	2.86748e+06
High	Master Protein	Q9H6R4	Nucleolar protein 6 OS=Homo sapiens OX=9606 GN=NOL6 PE=1 SV=2	3	4	22	4	127.5	NOL6	513943	634229	479947	368410	329362	443580
High	Master Protein	Q08945	FACT complex subunit SSRP1 OS=Homo sapiens OX=9606 GN=SSRP1 PE=1 SV=1	14	8	22	8	81	SSRP1	1.51607e+06	1.48617e+06	2.42089e+06	719893	398622	1.24725e+06
High	Master Protein	O00425	Insulin-like growth factor 2 mRNA-binding protein 3 OS=Homo sapiens OX=9606 GN=IGF2BP3 PE=1 SV=2	16	7	22	5	63.7	IGF2BP3	108121	77576.4	154886	351928	53812.4	195864
High	Master Protein	Q07955	Serine/arginine-rich splicing factor 1 OS=Homo sapiens OX=9606 GN=SRSF1 PE=1 SV=2	19	5	22	5	27.7	SRSF1	649249	450897	683664	1.71961e+06	1.15442e+06	2.59423e+06
High	Master Protein	Q9Y3F4	Serine-threonine kinase receptor-associated protein OS=Homo sapiens OX=9606 GN=STRAP PE=1 SV=1	44	10	22	10	38.4	STRAP	2.99189e+06	2.53904e+06	4.07545e+06	1.2632e+06	460898	1.80567e+06
High	Master Protein	Q7KZF4	Staphylococcal nuclease domain-containing protein 1 OS=Homo sapiens OX=9606 GN=SND1 PE=1 SV=1	11	9	22	9	101.9	SND1	3.53852e+06	3.60913e+06	4.68872e+06	429179	138074	690476
High	Master Protein	Q02880	DNA topoisomerase 2-beta OS=Homo sapiens OX=9606 GN=TOP2B PE=1 SV=3	5	7	21	3	183.2	TOP2B	547052	824909	314341	225907	173475	131267
High	Master Protein	Q8TDN6	Ribosome biogenesis protein BRX1 homolog OS=Homo sapiens OX=9606 GN=BRIX1 PE=1 SV=2	10	4	21	4	41.4	BRIX1	770021	670019	1.04857e+06	739017	663100	955779
High	Master Protein	P62851	Small ribosomal subunit protein eS25 OS=Homo sapiens OX=9606 GN=RPS25 PE=1 SV=1	28	4	21	4	13.7	RPS25	3.75559e+06	5.04962e+06	6730779	2.79517e+06	2.45807e+06	6157280
High	Master Protein	Q9BQ67	Glutamate-rich WD repeat-containing protein 1 OS=Homo sapiens OX=9606 GN=GRWD1 PE=1 SV=1	15	5	20	5	49.4	GRWD1	1.71673e+06	1.23667e+06	833584	496434	231914	534410
High	Master Protein	Q13347	Eukaryotic translation initiation factor 3 subunit I OS=Homo sapiens OX=9606 GN=EIF3I PE=1 SV=1	22	7	20	7	36.5	EIF3I	2.72228e+06	2.07811e+06	5.19557e+06	199118	332478	837806
High	Master Protein	Q04837	Single-stranded DNA-binding protein, mitochondrial OS=Homo sapiens OX=9606 GN=SSBP1 PE=1 SV=1	30	5	20	5	17.2	SSBP1	4.00931e+06	5.38022e+06	6.71352e+06	5.14641e+06	2.17185e+06	5.55381e+06
High	Master Protein	Q13151	Heterogeneous nuclear ribonucleoprotein A0 OS=Homo sapiens OX=9606 GN=HNRNPA0 PE=1 SV=1	14	4	20	2	30.8	HNRNPA0	243841	233616	313361	212348		395913
High	Master Protein	P53618	Coatomer subunit beta OS=Homo sapiens OX=9606 GN=COPB1 PE=1 SV=3	11	9	20	9	107.1	COPB1	2.00499e+06	1909735	2.25837e+06	166870	213473	344226
High	Master Protein	P14678	Small nuclear ribonucleoprotein-associated proteins B and B' OS=Homo sapiens OX=9606 GN=SNRPB PE=1 SV=2	21	5	20	5	24.6	SNRPB	2.99101e+06	2.56243e+06	2.86594e+06	1.30453e+06	948697	1.9873e+06
High	Master Protein	P63241	Eukaryotic translation initiation factor 5A-1 OS=Homo sapiens OX=9606 GN=EIF5A PE=1 SV=2	31	4	20	4	16.8	EIF5A	712051	874074	1.02998e+06	1.02834e+06	1.27238e+06	1.966e+06
High	Master Protein	Q9H9B4	Sideroflexin-1 OS=Homo sapiens OX=9606 GN=SFXN1 PE=1 SV=4	17	5	20	5	35.6	SFXN1	1.41675e+06	1.73928e+06	2.50354e+06	1.38619e+06	965133	1.50519e+06
High	Master Protein	P56537	Eukaryotic translation initiation factor 6 OS=Homo sapiens OX=9606 GN=EIF6 PE=1 SV=1	27	4	20	4	26.6	EIF6	1.65377e+06	1.00854e+06	1.92108e+06	2.62172e+06	1.98976e+06	2.89454e+06
High	Master Protein	Q9UHD8	Septin-9 OS=Homo sapiens OX=9606 GN=SEPTIN9 PE=1 SV=2	16	9	20	9	65.4	SEPTIN9	3.17509e+06	2.95556e+06	6.06101e+06		32353.2	52004.3
High	Master Protein	P52907	F-actin-capping protein subunit alpha-1 OS=Homo sapiens OX=9606 GN=CAPZA1 PE=1 SV=3	27	5	20	4	32.9	CAPZA1	2.58942e+06	2.30689e+06	2.33072e+06	1.76085e+06	1.47852e+06	1.83543e+06
High	Master Protein	O60264	SWI/SNF-related matrix-associated actin-dependent regulator of chromatin subfamily A member 5 OS=Homo sapiens OX=9606 GN=SMARCA5 PE=1 SV=1	8	10	19	10	121.8	SMARCA5	1.41513e+06	1.58767e+06	1.07615e+06	740784	320898	612083
High	Master Protein	P62318	Small nuclear ribonucleoprotein Sm D3 OS=Homo sapiens OX=9606 GN=SNRPD3 PE=1 SV=1	15	2	19	2	13.9	SNRPD3	1.50254e+06	2.197e+06	2.08805e+06	1.0348e+06	1.28066e+06	1.85719e+06
High	Master Protein	O00231	26S proteasome non-ATPase regulatory subunit 11 OS=Homo sapiens OX=9606 GN=PSMD11 PE=1 SV=3	18	7	19	7	47.4	PSMD11	967516	1.01614e+06	1.24469e+06	932585	1.24321e+06	1.18943e+06
High	Master Protein	Q14151	Scaffold attachment factor B2 OS=Homo sapiens OX=9606 GN=SAFB2 PE=1 SV=1	6	4	19	4	107.4	SAFB2	621001	1.11403e+06	484181	1.79174e+06	1.24812e+06	1.63239e+06
High	Master Protein	P53396	ATP-citrate synthase OS=Homo sapiens OX=9606 GN=ACLY PE=1 SV=3	8	8	19	8	120.8	ACLY	444771	589297	574411	637607	303508	599459
High	Master Protein	Q8N163	Cell cycle and apoptosis regulator protein 2 OS=Homo sapiens OX=9606 GN=CCAR2 PE=1 SV=2	11	10	18	10	102.8	CCAR2	1.05631e+06	1.25627e+06	1.08972e+06
High	Master Protein	Q13200	26S proteasome non-ATPase regulatory subunit 2 OS=Homo sapiens OX=9606 GN=PSMD2 PE=1 SV=3	9	6	18	6	100.1	PSMD2	516920	543807	588781	502648	433174	744840
High	Master Protein	E9PAV3	Nascent polypeptide-associated complex subunit alpha, muscle-specific form OS=Homo sapiens OX=9606 GN=NACA PE=1 SV=1	2	3	18	3	205.3	NACA	2.42825e+06	2.74569e+06	2.76394e+06		355894	382320
High	Master Protein	Q12931	Heat shock protein 75 kDa, mitochondrial OS=Homo sapiens OX=9606 GN=TRAP1 PE=1 SV=3	6	4	18	3	80.1	TRAP1	270180	282310	369631	352716	283085	533738
High	Master Protein	Q15019	Septin-2 OS=Homo sapiens OX=9606 GN=SEPTIN2 PE=1 SV=1	22	6	18	6	41.5	SEPTIN2	1.98896e+06	1.47404e+06	1.85791e+06	73265.1		108034
High	Master Protein	P46087	Probable 28S rRNA (cytosine(4447)-C(5))-methyltransferase OS=Homo sapiens OX=9606 GN=NOP2 PE=1 SV=2	10	7	18	7	89.2	NOP2	1.81368e+06	1.53555e+06	1.24045e+06	1.48632e+06	1.13561e+06	1.40824e+06
High	Master Protein	P46782	Small ribosomal subunit protein uS7 OS=Homo sapiens OX=9606 GN=RPS5 PE=1 SV=4	17	5	18	5	22.9	RPS5	1.62888e+06	1.76442e+06	2.50582e+06	1.92922e+06	1.30742e+06	2.67228e+06
High	Master Protein	P78527	DNA-dependent protein kinase catalytic subunit OS=Homo sapiens OX=9606 GN=PRKDC PE=1 SV=3	2	9	18	9	468.8	PRKDC	716126	1.25396e+06	1.24689e+06	79325.4	261630
High	Master Protein	P35606	Coatomer subunit beta' OS=Homo sapiens OX=9606 GN=COPB2 PE=1 SV=2	14	10	18	10	102.4	COPB2	2.02037e+06	1.75557e+06	2.40423e+06	317854	257144	397519
High	Master Protein	P82930	Small ribosomal subunit protein mS34 OS=Homo sapiens OX=9606 GN=MRPS34 PE=1 SV=2	17	4	18	4	25.6	MRPS34	712589	783353	1.39843e+06	767395	630121	1.27658e+06
High	Master Protein	P51610	Host cell factor 1 OS=Homo sapiens OX=9606 GN=HCFC1 PE=1 SV=2	7	9	17	9	208.6	HCFC1	2.144e+06	2.36257e+06	3.99768e+06	585232	382621	844539
High	Master Protein	Q00535	Cyclin-dependent kinase 5 OS=Homo sapiens OX=9606 GN=CDK5 PE=1 SV=3	5	2	17	1	33.3	CDK5	79312.3	77551.4	63658	40358.4		65485
High	Master Protein	Q9P0M6	Core histone macro-H2A.2 OS=Homo sapiens OX=9606 GN=MACROH2A2 PE=1 SV=3	10	3	17	1	40	MACROH2A2	321464	332227	322432	285052	277745	528834
High	Master Protein	P57088	Transmembrane protein 33 OS=Homo sapiens OX=9606 GN=TMEM33 PE=1 SV=2	9	2	17	2	28	TMEM33	1.28398e+06	1.07993e+06	776685	451262	473509	448572
High	Master Protein	O00148	ATP-dependent RNA helicase DDX39A OS=Homo sapiens OX=9606 GN=DDX39A PE=1 SV=2	8	4	17	4	49.1	DDX39A	871417	930579	677270	631561	389750	943003
High	Master Protein	P07237	Protein disulfide-isomerase OS=Homo sapiens OX=9606 GN=P4HB PE=1 SV=3	16	8	17	8	57.1	P4HB	4.66688e+07	3.96505e+07	6.11609e+07	1.0938e+06	2.02354e+06	1.32075e+06
High	Master Protein	Q13547	Histone deacetylase 1 OS=Homo sapiens OX=9606 GN=HDAC1 PE=1 SV=1	13	5	17	2	55.1	HDAC1	1.10324e+06	877532	1.65002e+06	1.11736e+06	440727	1.56572e+06
High	Master Protein	P57678	Gem-associated protein 4 OS=Homo sapiens OX=9606 GN=GEMIN4 PE=1 SV=2	5	5	17	5	120	GEMIN4	3.33296e+06	3.35281e+06	2.65266e+06	4.45976e+06	3.42015e+06	6.42314e+06
High	Master Protein	P23528	Cofilin-1 OS=Homo sapiens OX=9606 GN=CFL1 PE=1 SV=3	32	4	17	4	18.5	CFL1	277626	602050	643223	1.3026e+06	1.58153e+06	1.94077e+06
High	Master Protein	Q92900	Regulator of nonsense transcripts 1 OS=Homo sapiens OX=9606 GN=UPF1 PE=1 SV=2	9	9	17	9	124.3	UPF1	832668	1.05384e+06	859808	618557	321459	420422
High	Master Protein	P48444	Coatomer subunit delta OS=Homo sapiens OX=9606 GN=ARCN1 PE=1 SV=1	16	8	17	8	57.2	ARCN1	1.92711e+06	1.56813e+06	1.82397e+06			163489
High	Master Protein	P84090	Enhancer of rudimentary homolog OS=Homo sapiens OX=9606 GN=ERH PE=1 SV=1	22	4	17	4	12.3	ERH	1.45219e+06	507216	973123	6.51774e+06	2.40568e+06	1.16394e+07
High	Master Protein	Q6UWP8	Suprabasin OS=Homo sapiens OX=9606 GN=SBSN PE=1 SV=2	18	3	17	3	60.5	SBSN	457259	258979	328630	412799	966126	7.66729e+06
High	Master Protein	P84085	ADP-ribosylation factor 5 OS=Homo sapiens OX=9606 GN=ARF5 PE=1 SV=2	40	5	17	1	20.5	ARF5	176031	123963		197634	130849
High	Master Protein	P00918	Carbonic anhydrase 2 OS=Homo sapiens OX=9606 GN=CA2 PE=1 SV=2	15	3	17	3	29.2	CA2	66105		146677	468627	3.58453e+06	690832
High	Master Protein	P29692	Elongation factor 1-delta OS=Homo sapiens OX=9606 GN=EEF1D PE=1 SV=5	20	4	16	4	31.1	EEF1D	1.35553e+06	1.04466e+06	1.09509e+06	929866	748646	1.28791e+06
High	Master Protein	Q7Z2W4	Zinc finger CCCH-type antiviral protein 1 OS=Homo sapiens OX=9606 GN=ZC3HAV1 PE=1 SV=3	6	5	16	5	101.4	ZC3HAV1	699606	574839	411192	423363	233273
High	Master Protein	O43684	Mitotic checkpoint protein BUB3 OS=Homo sapiens OX=9606 GN=BUB3 PE=1 SV=1	21	7	16	7	37.1	BUB3	2.48104e+06	2.1127e+06	2.90856e+06	3.16588e+06	1.27324e+06	2.83364e+06
High	Master Protein	O75533	Splicing factor 3B subunit 1 OS=Homo sapiens OX=9606 GN=SF3B1 PE=1 SV=3	6	7	16	7	145.7	SF3B1	687876	813351	355679	1.54233e+06	697927	1.63498e+06
High	Master Protein	O14950	Myosin regulatory light chain 12B OS=Homo sapiens OX=9606 GN=MYL12B PE=1 SV=2	22	4	16	4	19.8	MYL12B	692736	723687	797089	1.51674e+06	1.72034e+06	2.29989e+06
High	Master Protein	P31153	S-adenosylmethionine synthase isoform type-2 OS=Homo sapiens OX=9606 GN=MAT2A PE=1 SV=1	19	7	16	7	43.6	MAT2A	109563	145875	248736	338910	288239	393914
High	Master Protein	Q9UQ35	Serine/arginine repetitive matrix protein 2 OS=Homo sapiens OX=9606 GN=SRRM2 PE=1 SV=2	4	7	16	7	299.4	SRRM2	497839	603564	640679	907151	828128	1.65163e+06
High	Master Protein	P00492	Hypoxanthine-guanine phosphoribosyltransferase OS=Homo sapiens OX=9606 GN=HPRT1 PE=1 SV=2	16	3	16	3	24.6	HPRT1	1.06762e+06	1.28108e+06	1.50312e+06	1.18092e+06	586826	1.72548e+06
High	Master Protein	Q13620	Cullin-4B OS=Homo sapiens OX=9606 GN=CUL4B PE=1 SV=4	9	9	16	9	103.9	CUL4B	1.97164e+06	1.96013e+06	2.04156e+06	397947	235937	167225
High	Master Protein	Q13557	Calcium/calmodulin-dependent protein kinase type II subunit delta OS=Homo sapiens OX=9606 GN=CAMK2D PE=1 SV=3	13	6	16	4	56.3	CAMK2D	2.76159e+06	2.2284e+06	3.40771e+06	21801.7	127527
High	Master Protein	P08123	Collagen alpha-2(I) chain OS=Homo sapiens OX=9606 GN=COL1A2 PE=1 SV=7	2	3	16	3	129.2	COL1A2	1.23616e+06	970921	835879	820449	344578	1.05911e+06
High	Master Protein	P20930	Filaggrin OS=Homo sapiens OX=9606 GN=FLG PE=1 SV=3	6	8	16	8	434.9	FLG	524832	203832	632992	260551	1.08203e+06	4.11644e+06
High	Master Protein	O14979	Heterogeneous nuclear ribonucleoprotein D-like OS=Homo sapiens OX=9606 GN=HNRNPDL PE=1 SV=3	6	3	16	1	46.4	HNRNPDL	584636	438314	486910	588525	392508	1.07355e+06
High	Master Protein	O75494	Serine/arginine-rich splicing factor 10 OS=Homo sapiens OX=9606 GN=SRSF10 PE=1 SV=1	23	6	16	6	31.3	SRSF10	302466	256607	227352	1.58295e+06	1.00434e+06	2.7193e+06
High	Master Protein	P43686	26S proteasome regulatory subunit 6B OS=Homo sapiens OX=9606 GN=PSMC4 PE=1 SV=2	17	7	16	7	47.3	PSMC4	591894	603812	495833	436440	607405	669188
High	Master Protein	Q15008	26S proteasome non-ATPase regulatory subunit 6 OS=Homo sapiens OX=9606 GN=PSMD6 PE=1 SV=1	19	7	16	7	45.5	PSMD6	2.63087e+06	2.48493e+06	3.19119e+06	718286	350231	1.03761e+06
High	Master Protein	O00303	Eukaryotic translation initiation factor 3 subunit F OS=Homo sapiens OX=9606 GN=EIF3F PE=1 SV=1	24	7	16	7	37.5	EIF3F	1.62251e+06	1506589	1.39651e+06	1.40297e+06	734811	1.75257e+06
High	Master Protein	P46776	Large ribosomal subunit protein uL15 OS=Homo sapiens OX=9606 GN=RPL27A PE=1 SV=2	29	4	16	4	16.6	RPL27A	2.97439e+06	4.68104e+06	6.0491e+06	3.99129e+06	2.83289e+06	6.58766e+06
High	Master Protein	Q86VP6	Cullin-associated NEDD8-dissociated protein 1 OS=Homo sapiens OX=9606 GN=CAND1 PE=1 SV=2	5	6	15	6	136.3	CAND1	88223.2	215920	308151	215504	198239	251123
High	Master Protein	P23381	Tryptophan--tRNA ligase, cytoplasmic OS=Homo sapiens OX=9606 GN=WARS1 PE=1 SV=2	24	8	15	8	53.1	WARS1	2.24757e+06	2.42353e+06	4.92585e+06	643287	391912	1.19733e+06
High	Master Protein	P62847	Small ribosomal subunit protein eS24 OS=Homo sapiens OX=9606 GN=RPS24 PE=1 SV=1	26	3	15	3	15.4	RPS24		185799	1.16357e+06	517183	422085	1.11069e+06
High	Master Protein	Q9Y678	Coatomer subunit gamma-1 OS=Homo sapiens OX=9606 GN=COPG1 PE=1 SV=1	7	6	15	4	97.7	COPG1	1.92809e+06	1.80292e+06	1.95695e+06	381924	482920	575876
High	Master Protein	Q9Y3I0	RNA-splicing ligase RtcB homolog OS=Homo sapiens OX=9606 GN=RTCB PE=1 SV=1	7	3	15	3	55.2	RTCB	563968	297869	809948	591436	429491	643632
High	Master Protein	O14980	Exportin-1 OS=Homo sapiens OX=9606 GN=XPO1 PE=1 SV=1	4	4	15	4	123.3	XPO1	601579	670788	804164	91359.3	198250	163600
High	Master Protein	P53007	Tricarboxylate transport protein, mitochondrial OS=Homo sapiens OX=9606 GN=SLC25A1 PE=1 SV=2	26	8	15	8	34	SLC25A1	3834617	3.22485e+06	4.75108e+06	827462	815303	1.30174e+06
High	Master Protein	P04637	Cellular tumor antigen p53 OS=Homo sapiens OX=9606 GN=TP53 PE=1 SV=4	12	4	15	4	43.6	TP53	2.27954e+06	1.7814e+06	2.23817e+06	956657	364002	921940
High	Master Protein	P24666	Low molecular weight phosphotyrosine protein phosphatase OS=Homo sapiens OX=9606 GN=ACP1 PE=1 SV=3	24	3	15	3	18	ACP1	1.02966e+06	976285	1.253e+06	1.82832e+06	2.47247e+06	2.35948e+06
High	Master Protein	O60884	DnaJ homolog subfamily A member 2 OS=Homo sapiens OX=9606 GN=DNAJA2 PE=1 SV=1	12	6	15	6	45.7	DNAJA2	3.73647e+06	2.80115e+06	4.54812e+06	1.44197e+06	584288	1.89632e+06
High	Master Protein	Q14157	Ubiquitin-associated protein 2-like OS=Homo sapiens OX=9606 GN=UBAP2L PE=1 SV=2	5	4	15	4	114.5	UBAP2L	1.4366e+06	1.4064e+06	799252	399262	340751	274008
High	Master Protein	P50395	Rab GDP dissociation inhibitor beta OS=Homo sapiens OX=9606 GN=GDI2 PE=1 SV=2	13	4	15	4	50.6	GDI2	676042	415001	768408	1.12269e+06	1.07566e+06	1.85417e+06
High	Master Protein	Q13435	Splicing factor 3B subunit 2 OS=Homo sapiens OX=9606 GN=SF3B2 PE=1 SV=2	10	6	15	6	100.2	SF3B2	2.18298e+06	2.17493e+06	2.11877e+06	1.89217e+06	895372	1.82174e+06
High	Master Protein	P07339	Cathepsin D OS=Homo sapiens OX=9606 GN=CTSD PE=1 SV=1	15	6	15	6	44.5	CTSD	957459	284345	296297	1.58871e+06	1.63436e+06	5.16057e+06
High	Master Protein	P04040	Catalase OS=Homo sapiens OX=9606 GN=CAT PE=1 SV=3	11	6	15	6	59.7	CAT	431592	333233	783983	448839	3.08903e+06	3.67184e+06
High	Master Protein	P35520	Cystathionine beta-synthase OS=Homo sapiens OX=9606 GN=CBS PE=1 SV=2	9	5	14	5	60.5	CBS	1.18428e+06	812310	1.24787e+06	1.81409e+06	1.2609e+06	2.19267e+06
High	Master Protein	P42766	Large ribosomal subunit protein uL29 OS=Homo sapiens OX=9606 GN=RPL35 PE=1 SV=2	26	3	14	3	14.5	RPL35	633539	1.00669e+06	1.7346e+06	1.78868e+06	1.53692e+06	3.93017e+06
High	Master Protein	P49207	Large ribosomal subunit protein eL34 OS=Homo sapiens OX=9606 GN=RPL34 PE=1 SV=3	15	3	14	3	13.3	RPL34	207911	323861	556295	678141	369350	1.04228e+06
High	Master Protein	P39060	Collagen alpha-1(XVIII) chain OS=Homo sapiens OX=9606 GN=COL18A1 PE=1 SV=5	3	4	14	4	178.1	COL18A1	150942	187737	161384	990582	693308	1.0234e+06
High	Master Protein	Q9Y657	Spindlin-1 OS=Homo sapiens OX=9606 GN=SPIN1 PE=1 SV=3	25	5	14	5	29.6	SPIN1	93566.7		56837.4	1.53509e+06	1.14524e+06	2.19495e+06
High	Master Protein	Q6P1J9	Parafibromin OS=Homo sapiens OX=9606 GN=CDC73 PE=1 SV=1	16	8	14	8	60.5	CDC73	1.33549e+06	916967	1.15149e+06			98273.5
High	Master Protein	P60228	Eukaryotic translation initiation factor 3 subunit E OS=Homo sapiens OX=9606 GN=EIF3E PE=1 SV=1	12	6	14	6	52.2	EIF3E	2.11893e+06	1.82809e+06	2.03684e+06	466910	535015	456535
High	Master Protein	P21796	Voltage-dependent anion-selective channel protein 1 OS=Homo sapiens OX=9606 GN=VDAC1 PE=1 SV=2	19	5	14	4	30.8	VDAC1	1.78701e+06	1.92713e+06	1.3812e+06	53529.7	386858	221110
High	Master Protein	P27694	Replication protein A 70 kDa DNA-binding subunit OS=Homo sapiens OX=9606 GN=RPA1 PE=1 SV=2	17	8	14	8	68.1	RPA1	1.48377e+06	1.23598e+06	1.96018e+06	1.04445e+06	432086	1.20838e+06
High	Master Protein	Q9UBX3	Mitochondrial dicarboxylate carrier OS=Homo sapiens OX=9606 GN=SLC25A10 PE=1 SV=2	18	4	14	4	31.3	SLC25A10	2.86849e+06	2.61124e+06	2.44332e+06	4.46219e+06	4.03393e+06	4.76189e+06
High	Master Protein	Q99714	3-hydroxyacyl-CoA dehydrogenase type-2 OS=Homo sapiens OX=9606 GN=HSD17B10 PE=1 SV=3	23	4	14	4	26.9	HSD17B10	549640	553077	435022	594962	599280	762732
High	Master Protein	P55884	Eukaryotic translation initiation factor 3 subunit B OS=Homo sapiens OX=9606 GN=EIF3B PE=1 SV=3	8	6	14	6	92.4	EIF3B	1.48575e+06	1.47008e+06	1.57752e+06	494144	794350	574816
High	Master Protein	Q92769	Histone deacetylase 2 OS=Homo sapiens OX=9606 GN=HDAC2 PE=1 SV=2	11	4	14	1	55.3	HDAC2	235469		162527		46431.3	185046
High	Master Protein	Q15274	Nicotinate-nucleotide pyrophosphorylase [carboxylating] OS=Homo sapiens OX=9606 GN=QPRT PE=1 SV=3	15	4	14	4	30.8	QPRT				1.75635e+06	3.67427e+06	1.89891e+06
High	Master Protein	Q92552	Small ribosomal subunit protein mS27 OS=Homo sapiens OX=9606 GN=MRPS27 PE=1 SV=3	8	4	14	4	47.6	MRPS27	215725	197446	214620	215231		262506
High	Master Protein	P62195	26S proteasome regulatory subunit 8 OS=Homo sapiens OX=9606 GN=PSMC5 PE=1 SV=1	16	5	14	5	45.6	PSMC5	1.15779e+06	866781	793886	1.26726e+06	769822	1.01453e+06
High	Master Protein	Q99729	Heterogeneous nuclear ribonucleoprotein A/B OS=Homo sapiens OX=9606 GN=HNRNPAB PE=1 SV=2	12	4	13	3	36.2	HNRNPAB	184298	124560	172942	208319	205975	789306
High	Master Protein	Q9NXS2	Glutaminyl-peptide cyclotransferase-like protein OS=Homo sapiens OX=9606 GN=QPCTL PE=1 SV=2	10	4	13	4	42.9	QPCTL	1.63037e+06	1.54274e+06	2.63874e+06	1.51665e+06	774100	2.04166e+06
High	Master Protein	P22735	Protein-glutamine gamma-glutamyltransferase K OS=Homo sapiens OX=9606 GN=TGM1 PE=1 SV=4	6	4	13	4	89.7	TGM1	859523	512438	494792	1.69949e+06	1.94113e+06	2.23241e+06
High	Master Protein	Q04760	Lactoylglutathione lyase OS=Homo sapiens OX=9606 GN=GLO1 PE=1 SV=4	22	5	13	5	20.8	GLO1	481905	708561	1.25256e+06	2.56796e+06	1.90132e+06	4.06584e+06
High	Master Protein	P00403	Cytochrome c oxidase subunit 2 OS=Homo sapiens OX=9606 GN=MT-CO2 PE=1 SV=1	7	3	13	3	25.5	MT-CO2	1.34565e+06	952367	984207	914471	788715	987370
High	Master Protein	Q13618	Cullin-3 OS=Homo sapiens OX=9606 GN=CUL3 PE=1 SV=2	8	7	13	7	88.9	CUL3	997401	937088	2.59303e+06	2.70858e+06	1.76546e+06	3.13667e+06
High	Master Protein	Q5BKZ1	DBIRD complex subunit ZNF326 OS=Homo sapiens OX=9606 GN=ZNF326 PE=1 SV=2	6	4	13	4	65.6	ZNF326	893305	846409	1.27394e+06	1.26239e+06	652589	1.75186e+06
High	Master Protein	Q96GQ7	Probable ATP-dependent RNA helicase DDX27 OS=Homo sapiens OX=9606 GN=DDX27 PE=1 SV=2	6	4	13	4	89.8	DDX27	440054	437970	374534	498233	428255	567205
High	Master Protein	Q9UMS4	Pre-mRNA-processing factor 19 OS=Homo sapiens OX=9606 GN=PRPF19 PE=1 SV=1	15	6	13	6	55.1	PRPF19	876390	933475	1.11699e+06	1.11564e+06	596110	1.59778e+06
High	Master Protein	P30048	Thioredoxin-dependent peroxide reductase, mitochondrial OS=Homo sapiens OX=9606 GN=PRDX3 PE=1 SV=3	13	3	13	3	27.7	PRDX3	408957	417132	396127	402388	352902	761988
High	Master Protein	P62899	Large ribosomal subunit protein eL31 OS=Homo sapiens OX=9606 GN=RPL31 PE=1 SV=1	30	4	13	4	14.5	RPL31	621824	632385	1.65427e+06	1.70555e+06	1.46295e+06	2.81959e+06
High	Master Protein	P25311	Zinc-alpha-2-glycoprotein OS=Homo sapiens OX=9606 GN=AZGP1 PE=1 SV=2	28	7	13	7	34.2	AZGP1	1.00794e+06	334640	721696	1.51836e+06	712423	5.69771e+06
High	Master Protein	Q9UBF2	Coatomer subunit gamma-2 OS=Homo sapiens OX=9606 GN=COPG2 PE=1 SV=1	4	4	13	2	97.6	COPG2	661367	576448	729722	128912	86097.7	130924
High	Master Protein	P01860	Immunoglobulin heavy constant gamma 3 OS=Homo sapiens OX=9606 GN=IGHG3 PE=1 SV=3	4	2	13	1	49.1	IGHG3	1.03941e+06	690225	950015	1.02484e+06	298959	1.13096e+06
High	Master Protein	Q9H7B2	Ribosome production factor 2 homolog OS=Homo sapiens OX=9606 GN=RPF2 PE=1 SV=2	5	2	13	2	35.6	RPF2	104697	140453	121697	110250	81754.7	151087
High	Master Protein	Q9NVA2	Septin-11 OS=Homo sapiens OX=9606 GN=SEPTIN11 PE=1 SV=3	11	5	13	3	49.4	SEPTIN11	3.16555e+06	2.38777e+06	2.93243e+06		129894
High	Master Protein	P11586	C-1-tetrahydrofolate synthase, cytoplasmic OS=Homo sapiens OX=9606 GN=MTHFD1 PE=1 SV=4	8	7	13	7	101.5	MTHFD1	422936	531149	656174	443569	392094	649554
High	Master Protein	P83111	Serine beta-lactamase-like protein LACTB, mitochondrial OS=Homo sapiens OX=9606 GN=LACTB PE=1 SV=2	13	6	13	6	60.7	LACTB	2.32145e+06	1.85787e+06	2.56267e+06		112726
High	Master Protein	Q16875	6-phosphofructo-2-kinase/fructose-2,6-bisphosphatase 3 OS=Homo sapiens OX=9606 GN=PFKFB3 PE=1 SV=1	12	6	13	6	59.6	PFKFB3	542714	178308	351469	2.22333e+06	278888	2.0585e+06
High	Master Protein	O75643	U5 small nuclear ribonucleoprotein 200 kDa helicase OS=Homo sapiens OX=9606 GN=SNRNP200 PE=1 SV=2	4	7	13	7	244.4	SNRNP200		1.10193e+06	867041	114019	550865	580916
High	Master Protein	Q9Y4W2	Ribosomal biogenesis protein LAS1L OS=Homo sapiens OX=9606 GN=LAS1L PE=1 SV=2	9	5	13	5	83	LAS1L	1.40692e+06	1.38666e+06	1.49612e+06	154553	293394	257945
High	Master Protein	Q9Y2H1	Serine/threonine-protein kinase 38-like OS=Homo sapiens OX=9606 GN=STK38L PE=1 SV=3	12	6	12	2	54	STK38L				101520		167074
High	Master Protein	P39656	Dolichyl-diphosphooligosaccharide--protein glycosyltransferase 48 kDa subunit OS=Homo sapiens OX=9606 GN=DDOST PE=1 SV=4	11	5	12	5	50.8	DDOST	1.0865e+06	1.12742e+06	855811	520204	873324	735528
High	Master Protein	Q9Y490	Talin-1 OS=Homo sapiens OX=9606 GN=TLN1 PE=1 SV=3	6	11	12	11	269.6	TLN1	60171.7	78742.4		43154.2	2.42102e+06
High	Master Protein	Q9BUA3	Spindlin interactor and repressor of chromatin-binding protein OS=Homo sapiens OX=9606 GN=SPINDOC PE=1 SV=3	9	3	12	3	41	SPINDOC	72274.2			1.97483e+06	1.15315e+06	1.81866e+06
High	Master Protein	P01024	Complement C3 OS=Homo sapiens OX=9606 GN=C3 PE=1 SV=2	3	5	12	5	187	C3	275295	746962	452811	2.15673e+06	1.10843e+07	867870
High	Master Protein	Q5RKV6	Exosome complex component MTR3 OS=Homo sapiens OX=9606 GN=EXOSC6 PE=1 SV=1	32	6	12	6	28.2	EXOSC6	322520	295900	748874	1.39022e+06	634967	1.85638e+06
High	Master Protein	P12814	Alpha-actinin-1 OS=Homo sapiens OX=9606 GN=ACTN1 PE=1 SV=2	4	3	12	3	103	ACTN1	128632	241458	367147	269312	599488	140058
High	Master Protein	P42677	Small ribosomal subunit protein eS27 OS=Homo sapiens OX=9606 GN=RPS27 PE=1 SV=3	25	2	12	2	9.5	RPS27	1.622e+06	2.05834e+06	4.0639e+06	364696	247928	595462
High	Master Protein	P22234	Bifunctional phosphoribosylaminoimidazole carboxylase/phosphoribosylaminoimidazole succinocarboxamide synthetase OS=Homo sapiens OX=9606 GN=PAICS PE=1 SV=3	8	3	12	3	47	PAICS	560845	495141	805258	1.25821e+06	578980	1.76996e+06
High	Master Protein	O95433	Activator of 90 kDa heat shock protein ATPase homolog 1 OS=Homo sapiens OX=9606 GN=AHSA1 PE=1 SV=1	11	3	12	3	38.3	AHSA1	1.16602e+06	1.03008e+06	1.76317e+06	688145	478598	783589
High	Master Protein	O00541	Pescadillo homolog OS=Homo sapiens OX=9606 GN=PES1 PE=1 SV=1	5	3	12	3	68	PES1	719201	520217	523130	547234	434449	726364
High	Master Protein	Q9UNM6	26S proteasome non-ATPase regulatory subunit 13 OS=Homo sapiens OX=9606 GN=PSMD13 PE=1 SV=2	10	4	12	4	42.9	PSMD13	617301	464379	670261	702821	645137	628998
High	Master Protein	Q01469	Fatty acid-binding protein 5 OS=Homo sapiens OX=9606 GN=FABP5 PE=1 SV=3	13	2	12	2	15.2	FABP5	523516	135295	497755	330523	355644	1.15281e+06
High	Master Protein	Q9NVI7	ATPase family AAA domain-containing protein 3A OS=Homo sapiens OX=9606 GN=ATAD3A PE=1 SV=2	6	4	12	4	71.3	ATAD3A	2.50616e+06	2.17194e+06	2.18312e+06	814271	680354	1.119e+06
High	Master Protein	Q13555	Calcium/calmodulin-dependent protein kinase type II subunit gamma OS=Homo sapiens OX=9606 GN=CAMK2G PE=1 SV=4	8	4	12	2	62.6	CAMK2G	839389	609147	769714
High	Master Protein	P30613	Pyruvate kinase PKLR OS=Homo sapiens OX=9606 GN=PKLR PE=1 SV=2	4	2	12	1	61.8	PKLR					187001
High	Master Protein	P26196	Probable ATP-dependent RNA helicase DDX6 OS=Homo sapiens OX=9606 GN=DDX6 PE=1 SV=2	10	3	11	3	54.4	DDX6	153098	115505	121553		46571	121458
High	Master Protein	Q9BVP2	Guanine nucleotide-binding protein-like 3 OS=Homo sapiens OX=9606 GN=GNL3 PE=1 SV=2	10	4	11	4	62	GNL3	297097	351889	370769	398591	313291	721972
High	Master Protein	O75131	Copine-3 OS=Homo sapiens OX=9606 GN=CPNE3 PE=1 SV=1	5	3	11	3	60.1	CPNE3	759122	710425	589468	694806	708575	965508
High	Master Protein	Q7Z7K6	Centromere protein V OS=Homo sapiens OX=9606 GN=CENPV PE=1 SV=1	8	2	11	2	29.9	CENPV	465642	439605	991042	428289	234248	1.03358e+06
High	Master Protein	O43318	Mitogen-activated protein kinase kinase kinase 7 OS=Homo sapiens OX=9606 GN=MAP3K7 PE=1 SV=1	7	5	11	5	67.2	MAP3K7	802961	653954	1.06356e+06	189935	38388.3	144335
High	Master Protein	P51114	RNA-binding protein FXR1 OS=Homo sapiens OX=9606 GN=FXR1 PE=1 SV=3	5	3	11	3	69.7	FXR1	876545	785338	1.57905e+06	1.3601e+06	596190	1.68548e+06
High	Master Protein	P33991	DNA replication licensing factor MCM4 OS=Homo sapiens OX=9606 GN=MCM4 PE=1 SV=5	8	6	11	6	96.5	MCM4	856648	867218	551409	452895	334256	587480
High	Master Protein	P08195	Amino acid transporter heavy chain SLC3A2 OS=Homo sapiens OX=9606 GN=SLC3A2 PE=1 SV=3	7	3	11	3	68	SLC3A2	446951	475152	527511	406459	217509	366584
High	Master Protein	Q96DA0	Zymogen granule protein 16 homolog B OS=Homo sapiens OX=9606 GN=ZG16B PE=1 SV=3	31	5	11	5	22.7	EECP	1.4243e+06	993101	1.1822e+06	1.0042e+06	628015	1.40615e+06
High	Master Protein	A6NHR9	Structural maintenance of chromosomes flexible hinge domain-containing protein 1 OS=Homo sapiens OX=9606 GN=SMCHD1 PE=1 SV=2	3	6	11	6	226.2	SMCHD1	581454	959309	897690	1.07472e+06	934077	1.48866e+06
High	Master Protein	O75821	Eukaryotic translation initiation factor 3 subunit G OS=Homo sapiens OX=9606 GN=EIF3G PE=1 SV=2	18	5	11	5	35.6	EIF3G	1.16968e+06	932633	1.10366e+06	300399	133998	317096
High	Master Protein	Q15517	Corneodesmosin OS=Homo sapiens OX=9606 GN=CDSN PE=1 SV=3	7	3	11	3	51.5		490712	321841	465773	271940	944383	2155072
High	Master Protein	Q14315	Filamin-C OS=Homo sapiens OX=9606 GN=FLNC PE=1 SV=3	2	3	11	1	290.8	FLNC	107298	83067.2	128293
High	Master Protein	P04181	Ornithine aminotransferase, mitochondrial OS=Homo sapiens OX=9606 GN=OAT PE=1 SV=1	15	5	11	5	48.5	OAT				80211.7	83103	110891
High	Master Protein	Q9UJZ1	Stomatin-like protein 2, mitochondrial OS=Homo sapiens OX=9606 GN=STOML2 PE=1 SV=1	9	2	11	2	38.5	STOML2	363651	219728	409398	349762	44186.7	410187
High	Master Protein	P25789	Proteasome subunit alpha type-4 OS=Homo sapiens OX=9606 GN=PSMA4 PE=1 SV=1	10	3	11	3	29.5	PSMA4	4.10662e+06	3.24373e+06	3361798	1.93553e+06	2.16944e+06	3.75542e+06
High	Master Protein	P61026	Ras-related protein Rab-10 OS=Homo sapiens OX=9606 GN=RAB10 PE=1 SV=1	11	2	10	1	22.5	RAB10		30514.3	36920.3		61006
High	Master Protein	P14174	Macrophage migration inhibitory factor OS=Homo sapiens OX=9606 GN=MIF PE=1 SV=4	14	2	10	2	12.5	MIF	1.46825e+06	1.38707e+06	1.42553e+06	1.70939e+06	1.25258e+06	1.66514e+06
High	Master Protein	P56192	Methionine--tRNA ligase, cytoplasmic OS=Homo sapiens OX=9606 GN=MARS1 PE=1 SV=2	8	6	10	6	101.1	MARS1	1.42411e+06	1.39194e+06	1.34579e+06	110606	54464.4	111636
High	Master Protein	P46783	Small ribosomal subunit protein eS10 OS=Homo sapiens OX=9606 GN=RPS10 PE=1 SV=1	20	3	10	3	18.9	RPS10	354909	324860	518451	151791	146655	313281
High	Master Protein	P28072	Proteasome subunit beta type-6 OS=Homo sapiens OX=9606 GN=PSMB6 PE=1 SV=4	13	3	10	3	25.3	PSMB6	843698	615225	635379	1.14128e+06	1.15283e+06	1.27818e+06
High	Master Protein	P62316	Small nuclear ribonucleoprotein Sm D2 OS=Homo sapiens OX=9606 GN=SNRPD2 PE=1 SV=1	22	3	10	3	13.5	SNRPD2	542644	723671	753631	672256	708168	1.07706e+06
High	Master Protein	Q9Y5S9	RNA-binding protein 8A OS=Homo sapiens OX=9606 GN=RBM8A PE=1 SV=1	22	4	10	4	19.9	RBM8A	147020	103451		562044	376061	807072
High	Master Protein	P04844	Dolichyl-diphosphooligosaccharide--protein glycosyltransferase subunit 2 OS=Homo sapiens OX=9606 GN=RPN2 PE=1 SV=3	9	4	10	4	69.2	RPN2	300730	357472	296831	105389		98250.3
High	Master Protein	Q14204	Cytoplasmic dynein 1 heavy chain 1 OS=Homo sapiens OX=9606 GN=DYNC1H1 PE=1 SV=5	1	5	10	5	532.1	DYNC1H1	597757	703315	715225		17457.6	205962
High	Master Protein	Q92599	Septin-8 OS=Homo sapiens OX=9606 GN=SEPTIN8 PE=1 SV=4	5	3	10	1	55.7	SEPTIN8	487258	430536	284315		33471.1
High	Master Protein	P47756	F-actin-capping protein subunit beta OS=Homo sapiens OX=9606 GN=CAPZB PE=1 SV=5	15	4	10	4	30.6	CAPZB	530549	500434	1.10563e+06	900888	845674	1.06733e+06
High	Master Protein	P62081	Small ribosomal subunit protein eS7 OS=Homo sapiens OX=9606 GN=RPS7 PE=1 SV=1	19	4	10	4	22.1	RPS7	1.69037e+06	1.05313e+06	3.60306e+06	2.5295e+06	2.99271e+06	2.53726e+06
High	Master Protein	P35232	Prohibitin 1 OS=Homo sapiens OX=9606 GN=PHB1 PE=1 SV=1	19	5	10	5	29.8	PHB1	1.13815e+06	1.27098e+06	1.1458e+06	648511	941198	713265
High	Master Protein	P02452	Collagen alpha-1(I) chain OS=Homo sapiens OX=9606 GN=COL1A1 PE=1 SV=6	5	5	10	5	138.8	COL1A1	1.17498e+06	680492	834678	456397	403874	1.92992e+06
High	Master Protein	Q7Z4H3	5'-deoxynucleotidase HDDC2 OS=Homo sapiens OX=9606 GN=HDDC2 PE=1 SV=1	18	3	10	3	23.4	HDDC2	166972	172996	97063	733555	180370	540899
High	Master Protein	Q03252	Lamin-B2 OS=Homo sapiens OX=9606 GN=LMNB2 PE=1 SV=4	9	6	10	2	69.9	LMNB2	402579	155121	349089	223199	191869	515344
High	Master Protein	P0DOY2	Immunoglobulin lambda constant 2 OS=Homo sapiens OX=9606 GN=IGLC2 PE=1 SV=1	24	2	10	1	11.3	IGLC2	480444	150354	331473	1.58464e+06	71875.9	415292
High	Master Protein	Q13501	Sequestosome-1 OS=Homo sapiens OX=9606 GN=SQSTM1 PE=1 SV=1	13	4	10	4	47.7	SQSTM1	2.94868e+06	2.46782e+06	2.96169e+06
High	Master Protein	Q16769	Glutaminyl-peptide cyclotransferase OS=Homo sapiens OX=9606 GN=QPCT PE=1 SV=1	19	5	10	5	40.9	QPCT	760276	712896	872562	1.61531e+06	842063	1.96649e+06
High	Master Protein	P0DP25	Calmodulin-3 OS=Homo sapiens OX=9606 GN=CALM3 PE=1 SV=1	37	5	10	5	16.8	CALM3	2.32415e+06	1.978e+06	2.27929e+06	3.22587e+06	2.50609e+06	3.48007e+06
High	Master Protein	Q3ZCQ8	Mitochondrial import inner membrane translocase subunit TIM50 OS=Homo sapiens OX=9606 GN=TIMM50 PE=1 SV=2	13	4	10	4	39.6	TIMM50	785484	716277	798455	519694	236073	783245
High	Master Protein	Q9BTY7	Protein HGH1 homolog OS=Homo sapiens OX=9606 GN=HGH1 PE=1 SV=1	17	5	10	5	42.1	HGH1	1.33821e+06	1.28054e+06	1.18078e+06
High	Master Protein	O00410	Importin-5 OS=Homo sapiens OX=9606 GN=IPO5 PE=1 SV=4	4	4	10	4	123.6	IPO5	506217	462020	423090	298198	259427	410755
High	Master Protein	P28074	Proteasome subunit beta type-5 OS=Homo sapiens OX=9606 GN=PSMB5 PE=1 SV=3	19	4	9	4	28.5	PSMB5	163487	96479.4	179275	256518	170716	392836
High	Master Protein	P17980	26S proteasome regulatory subunit 6A OS=Homo sapiens OX=9606 GN=PSMC3 PE=1 SV=3	9	3	9	3	49.2	PSMC3	233671	202744	202202	181524	214924	313251
High	Master Protein	Q92734	Protein TFG OS=Homo sapiens OX=9606 GN=TFG PE=1 SV=2	13	2	9	2	43.4	TFG	690230	559821	375778	235778		225861
High	Master Protein	Q9BZE4	GTP-binding protein 4 OS=Homo sapiens OX=9606 GN=GTPBP4 PE=1 SV=3	6	4	9	4	73.9	GTPBP4	961639	980824	1.32266e+06	860683	593452	1.06518e+06
High	Master Protein	O95793	Double-stranded RNA-binding protein Staufen homolog 1 OS=Homo sapiens OX=9606 GN=STAU1 PE=1 SV=2	9	5	9	5	63.1	STAU1	1.76532e+06	1.30126e+06	1.85562e+06	362937	307003	820958
High	Master Protein	P55072	Transitional endoplasmic reticulum ATPase OS=Homo sapiens OX=9606 GN=VCP PE=1 SV=4	9	7	9	7	89.3	VCP	151468	228077	183733	295201	1.63134e+06	580344
High	Master Protein	P61619	Protein transport protein Sec61 subunit alpha isoform 1 OS=Homo sapiens OX=9606 GN=SEC61A1 PE=1 SV=2	5	3	9	3	52.2	SEC61A1	1.49443e+06	904999	1.27129e+06	920364	850744	1.09861e+06
High	Master Protein	P42771	Cyclin-dependent kinase inhibitor 2A OS=Homo sapiens OX=9606 GN=CDKN2A PE=1 SV=2	26	3	9	3	16.5	CDKN2A	411459	392311	610373	138586	92530.9	352786
High	Master Protein	Q6ZVX7	F-box only protein 50 OS=Homo sapiens OX=9606 GN=NCCRP1 PE=1 SV=1	7	2	9	2	30.8	NCCRP1	277172	135866	330590	341475	373795	1.21095e+06
High	Master Protein	Q14697	Neutral alpha-glucosidase AB OS=Homo sapiens OX=9606 GN=GANAB PE=1 SV=3	8	7	9	7	106.8	GANAB	226848	243324	291882	282829	353384	265952
High	Master Protein	B5ME19	Eukaryotic translation initiation factor 3 subunit C-like protein OS=Homo sapiens OX=9606 GN=EIF3CL PE=1 SV=1	4	4	9	4	105.4	EIF3CL	248284	198931	340565	178095
High	Master Protein	P05090	Apolipoprotein D OS=Homo sapiens OX=9606 GN=APOD PE=1 SV=1	15	3	9	3	21.3	APOD	1.87316e+06	346555	677912	1.15417e+06	405004	2.71307e+06
High	Master Protein	P49721	Proteasome subunit beta type-2 OS=Homo sapiens OX=9606 GN=PSMB2 PE=1 SV=1	10	2	9	2	22.8	PSMB2	157081	165911	158497		328943	197187
High	Master Protein	P42704	Leucine-rich PPR motif-containing protein, mitochondrial OS=Homo sapiens OX=9606 GN=LRPPRC PE=1 SV=3	2	3	9	3	157.8	LRPPRC	202550	226790	224230	206002	188963
High	Master Protein	Q8IY81	pre-rRNA 2'-O-ribose RNA methyltransferase FTSJ3 OS=Homo sapiens OX=9606 GN=FTSJ3 PE=1 SV=2	2	2	9	2	96.5	FTSJ3	430052	427014	375856	446436	299916	162689
High	Master Protein	Q7Z4H7	HAUS augmin-like complex subunit 6 OS=Homo sapiens OX=9606 GN=HAUS6 PE=1 SV=2	8	6	9	6	108.6	HAUS6	628503	627399	675204
High	Master Protein	P32969	Large ribosomal subunit protein uL6 OS=Homo sapiens OX=9606 GN=RPL9 PE=1 SV=1	16	3	9	3	21.9	RPL9; RPL9P7; RPL9P8; RPL9P9	798127	806726	995851	1.14221e+06	1.07598e+06	1.62554e+06
High	Master Protein	Q8WWY3	U4/U6 small nuclear ribonucleoprotein Prp31 OS=Homo sapiens OX=9606 GN=PRPF31 PE=1 SV=2	9	3	9	3	55.4	PRPF31	87769.1	93195.7	179994	1.18909e+06	251093	425033
High	Master Protein	Q9P258	Protein RCC2 OS=Homo sapiens OX=9606 GN=RCC2 PE=1 SV=2	6	3	9	3	56	RCC2	171630	164156	472712	182102	137238	432835
High	Master Protein	Q07666	KH domain-containing, RNA-binding, signal transduction-associated protein 1 OS=Homo sapiens OX=9606 GN=KHDRBS1 PE=1 SV=1	7	3	9	3	48.2	KHDRBS1	508585	447691	1.3422e+06	990555	420611	1.5138e+06
High	Master Protein	P35573	Glycogen debranching enzyme OS=Homo sapiens OX=9606 GN=AGL PE=1 SV=3	3	4	9	4	174.7	AGL	229258	229517	91057.2	292053	263880	329938
High	Master Protein	P62910	Large ribosomal subunit protein eL32 OS=Homo sapiens OX=9606 GN=RPL32 PE=1 SV=2	21	3	9	3	15.9	RPL32	3.14353e+06	3.44824e+06	4.35283e+06	5.99679e+06	3.89787e+06	7.25469e+06
High	Master Protein	P42357	Histidine ammonia-lyase OS=Homo sapiens OX=9606 GN=HAL PE=1 SV=1	12	6	9	6	72.7	HAL	82177.8	155757	421437	443127	1.07563e+06	2.76862e+06
High	Master Protein	O43491	Band 4.1-like protein 2 OS=Homo sapiens OX=9606 GN=EPB41L2 PE=1 SV=1	4	3	9	3	112.5	EPB41L2	1.45832e+06	1.3987e+06	397237	137513		83568.3
High	Master Protein	Q15773	Myeloid leukemia factor 2 OS=Homo sapiens OX=9606 GN=MLF2 PE=1 SV=1	15	4	9	4	28.1	MLF2	970397	998852	1.42184e+06		8246.21
High	Master Protein	Q13867	Bleomycin hydrolase OS=Homo sapiens OX=9606 GN=BLMH PE=1 SV=1	11	4	9	4	52.5	BLMH	202109	194969	291133	434103	730105	2.18134e+06
High	Master Protein	Q06787	Fragile X messenger ribonucleoprotein 1 OS=Homo sapiens OX=9606 GN=FMR1 PE=1 SV=1	9	5	9	5	71.1	FMR1	335828	285821	713851	1.26527e+06	746408	1.63645e+06
High	Master Protein	Q8NI36	WD repeat-containing protein 36 OS=Homo sapiens OX=9606 GN=WDR36 PE=1 SV=1	3	3	9	3	105.3	WDR36	300500	379317	377407	167470	159526	221183
High	Master Protein	Q9NZ01	Very-long-chain enoyl-CoA reductase OS=Homo sapiens OX=9606 GN=TECR PE=1 SV=1	12	4	9	4	36	TECR	836581	786025	1.29618e+06	397648	390447	147644
High	Master Protein	P62820	Ras-related protein Rab-1A OS=Homo sapiens OX=9606 GN=RAB1A PE=1 SV=3	9	2	8	1	22.7	RAB1A	189215	307901	212177	188345	600769	490956
High	Master Protein	Q9H3K6	BolA-like protein 2 OS=Homo sapiens OX=9606 GN=BOLA2 PE=1 SV=1	29	3	8	3	10.1	BOLA2; BOLA2B	562773	627686	1.30372e+06	1.21811e+06	782479	1.67804e+06
High	Master Protein	Q8IX01	SURP and G-patch domain-containing protein 2 OS=Homo sapiens OX=9606 GN=SUGP2 PE=1 SV=2	6	5	8	5	120.1	SUGP2	281318	333163	328837	61799.4	35484.9	84923.5
High	Master Protein	Q9H078	Mitochondrial disaggregase OS=Homo sapiens OX=9606 GN=CLPB PE=1 SV=1	8	5	8	5	78.7	CLPB	882003	472867	1.22442e+06
High	Master Protein	Q8TC07	TBC1 domain family member 15 OS=Homo sapiens OX=9606 GN=TBC1D15 PE=1 SV=2	5	3	8	3	79.4	TBC1D15	118656	103801	69014.1
High	Master Protein	Q14739	Delta(14)-sterol reductase LBR OS=Homo sapiens OX=9606 GN=LBR PE=1 SV=2	6	3	8	3	70.7	LBR	1.29656e+06	1.18142e+06	1.43116e+06		63050.6
High	Master Protein	P00367	Glutamate dehydrogenase 1, mitochondrial OS=Homo sapiens OX=9606 GN=GLUD1 PE=1 SV=2	9	5	8	5	61.4	GLUD1	178759	350153	225944	146480	1.83858e+06
High	Master Protein	P42285	Exosome RNA helicase MTR4 OS=Homo sapiens OX=9606 GN=MTREX PE=1 SV=3	2	2	8	2	117.7	MTREX	161654	181987	143555	275778	223812	219825
High	Master Protein	Q15149	Plectin OS=Homo sapiens OX=9606 GN=PLEC PE=1 SV=3	2	6	8	6	531.5	PLEC	95010.4	1.24263e+06	1.96363e+06	4515826	1.49809e+06
High	Master Protein	P62136	Serine/threonine-protein phosphatase PP1-alpha catalytic subunit OS=Homo sapiens OX=9606 GN=PPP1CA PE=1 SV=1	11	3	8	1	37.5	PPP1CA	517865	477815	540116	183494	167189	289199
High	Master Protein	P51571	Translocon-associated protein subunit delta OS=Homo sapiens OX=9606 GN=SSR4 PE=1 SV=1	25	3	8	3	19	SSR4	390496	439665	490532	158678	235903	397400
High	Master Protein	O00232	26S proteasome non-ATPase regulatory subunit 12 OS=Homo sapiens OX=9606 GN=PSMD12 PE=1 SV=3	4	2	8	2	52.9	PSMD12	981796	866907	963616	325623	296259	398642
High	Master Protein	P49321	Nuclear autoantigenic sperm protein OS=Homo sapiens OX=9606 GN=NASP PE=1 SV=2	3	3	8	3	85.2	NASP	324870	226254		424543	332391	500902
High	Master Protein	Q14566	DNA replication licensing factor MCM6 OS=Homo sapiens OX=9606 GN=MCM6 PE=1 SV=1	5	4	8	4	92.8	MCM6	220612	227197	180552	203601		174192
High	Master Protein	Q04323	UBX domain-containing protein 1 OS=Homo sapiens OX=9606 GN=UBXN1 PE=1 SV=2	18	4	8	4	33.3	UBXN1	2.84567e+06	2.597e+06	3.58985e+06	118044	85957.4	259889
High	Master Protein	Q6PKG0	La-related protein 1 OS=Homo sapiens OX=9606 GN=LARP1 PE=1 SV=2	3	3	8	3	123.4	LARP1	158167	231080	377980	564913	299621	932694
High	Master Protein	Q9HB71	Calcyclin-binding protein OS=Homo sapiens OX=9606 GN=CACYBP PE=1 SV=2	7	2	8	2	26.2	CACYBP	859145	649538	802497	220893	265296	308577
High	Master Protein	P24534	Elongation factor 1-beta OS=Homo sapiens OX=9606 GN=EEF1B2 PE=1 SV=3	16	3	8	3	24.7	EEF1B2	214818	238891	325227	424136		695367
High	Master Protein	O60762	Dolichol-phosphate mannosyltransferase subunit 1 OS=Homo sapiens OX=9606 GN=DPM1 PE=1 SV=1	19	3	8	3	29.6	DPM1	933186	862095	1.31143e+06	137990	215103	348060
High	Master Protein	Q07021	Complement component 1 Q subcomponent-binding protein, mitochondrial OS=Homo sapiens OX=9606 GN=C1QBP PE=1 SV=1	26	4	8	4	31.3	C1QBP	780274	514538	1.09991e+06	228802	51969.2	675453
High	Master Protein	Q10567	AP-1 complex subunit beta-1 OS=Homo sapiens OX=9606 GN=AP1B1 PE=1 SV=3	7	6	8	2	104.5	AP1B1	1.51162e+06	1.62588e+06	1.8125e+06	245344	233685	365317
High	Master Protein	P04843	Dolichyl-diphosphooligosaccharide--protein glycosyltransferase subunit 1 OS=Homo sapiens OX=9606 GN=RPN1 PE=1 SV=1	9	5	8	5	68.5	RPN1	769032	592134	789414	77229.8	135845	306692
High	Master Protein	O95232	Luc7-like protein 3 OS=Homo sapiens OX=9606 GN=LUC7L3 PE=1 SV=2	6	2	8	2	51.4	LUC7L3	202360	185498	198056	849017	308739	950662
High	Master Protein	P55265	Double-stranded RNA-specific adenosine deaminase OS=Homo sapiens OX=9606 GN=ADAR PE=1 SV=4	4	4	8	4	136	ADAR	113738	362589	414262	52022		84853.7
High	Master Protein	P23526	Adenosylhomocysteinase OS=Homo sapiens OX=9606 GN=AHCY PE=1 SV=4	12	5	8	5	47.7	AHCY	468247	468548	483620	939261	3.02186e+06	1.35515e+06
High	Master Protein	Q8WWK9	Cytoskeleton-associated protein 2 OS=Homo sapiens OX=9606 GN=CKAP2 PE=1 SV=1	7	4	8	4	76.9	CKAP2	1.11023e+06	1.2108e+06	1.35174e+06
High	Master Protein	P06753	Tropomyosin alpha-3 chain OS=Homo sapiens OX=9606 GN=TPM3 PE=1 SV=2	7	2	8	2	32.9	TPM3	99004.1	46382.1	73124	142629	747239	931391
High	Master Protein	P18583	Protein SON OS=Homo sapiens OX=9606 GN=SON PE=1 SV=4	2	2	7	2	263.7	SON	177565	273942	247441		25931.9
High	Master Protein	Q9UJC3	Protein Hook homolog 1 OS=Homo sapiens OX=9606 GN=HOOK1 PE=1 SV=2	5	3	7	3	84.6	HOOK1	1.07145e+06	886490	704760	74678.2
High	Master Protein	P48556	26S proteasome non-ATPase regulatory subunit 8 OS=Homo sapiens OX=9606 GN=PSMD8 PE=1 SV=2	9	3	7	3	39.6	PSMD8	522967	412392	513550	410966	247914	512163
High	Master Protein	Q14683	Structural maintenance of chromosomes protein 1A OS=Homo sapiens OX=9606 GN=SMC1A PE=1 SV=2	3	4	7	4	143.1	SMC1A	245740	463703	282889	206828	79155.3	189557
High	Master Protein	Q9H0A0	RNA cytidine acetyltransferase OS=Homo sapiens OX=9606 GN=NAT10 PE=1 SV=2	3	3	7	3	115.7	NAT10	197151	284853	145904	256279	251928	303473
High	Master Protein	Q96EY1	DnaJ homolog subfamily A member 3, mitochondrial OS=Homo sapiens OX=9606 GN=DNAJA3 PE=1 SV=2	7	3	7	3	52.5	DNAJA3	1.525e+06	1.23516e+06	1.82368e+06	476430	251826	318421
High	Master Protein	O75390	Citrate synthase, mitochondrial OS=Homo sapiens OX=9606 GN=CS PE=1 SV=2	6	3	7	3	51.7	CS	315528	252982	375177	665243	596252	1.01652e+06
High	Master Protein	P00966	Argininosuccinate synthase OS=Homo sapiens OX=9606 GN=ASS1 PE=1 SV=2	10	5	7	5	46.5	ASS1	107694	150634	368940	509180	6.92986e+06	360168
High	Master Protein	Q0VDF9	Heat shock 70 kDa protein 14 OS=Homo sapiens OX=9606 GN=HSPA14 PE=1 SV=1	19	6	7	6	54.8	HSPA14	1.21965e+06	898385	877708	126677		125388
High	Master Protein	Q5SW79	Centrosomal protein of 170 kDa OS=Homo sapiens OX=9606 GN=CEP170 PE=1 SV=1	1	2	7	2	175.2	CEP170	593249	920372	835242			443655
High	Master Protein	P55209	Nucleosome assembly protein 1-like 1 OS=Homo sapiens OX=9606 GN=NAP1L1 PE=1 SV=1	17	5	7	5	45.3	NAP1L1	631772	402901	467304	302689	112230	1.07642e+06
High	Master Protein	O15371	Eukaryotic translation initiation factor 3 subunit D OS=Homo sapiens OX=9606 GN=EIF3D PE=1 SV=1	9	3	7	3	63.9	EIF3D	1.12625e+06	1.04602e+06	2.3427e+06	98676.7	319739	865761
High	Master Protein	Q04727	Transducin-like enhancer protein 4 OS=Homo sapiens OX=9606 GN=TLE4 PE=1 SV=3	2	2	7	2	83.7	TLE4	326906	287335	323769	408374	267354	377145
High	Master Protein	O75190	DnaJ homolog subfamily B member 6 OS=Homo sapiens OX=9606 GN=DNAJB6 PE=1 SV=2	10	3	7	2	36.1	DNAJB6	2.85921e+06	2.45526e+06	3.4541e+06	506579	237455	532933
High	Master Protein	P25686	DnaJ homolog subfamily B member 2 OS=Homo sapiens OX=9606 GN=DNAJB2 PE=1 SV=3	9	3	7	2	35.6	DNAJB2	835428	599978	930956	277163	202398	310862
High	Master Protein	P12955	Xaa-Pro dipeptidase OS=Homo sapiens OX=9606 GN=PEPD PE=1 SV=3	5	3	7	3	54.5	PEPD	217188	156368	224300	347150	354123	482188
High	Master Protein	P55060	Exportin-2 OS=Homo sapiens OX=9606 GN=CSE1L PE=1 SV=3	3	3	7	3	110.3	CSE1L	194163	127619	118650	343151	120108	479471
High	Master Protein	Q9HC84	Mucin-5B OS=Homo sapiens OX=9606 GN=MUC5B PE=1 SV=3	1	6	7	5	596	MUC5B	1.42197e+06	440603	357297	3.07692e+06	46400.1
High	Master Protein	O76003	Glutaredoxin-3 OS=Homo sapiens OX=9606 GN=GLRX3 PE=1 SV=2	6	2	7	2	37.4	GLRX3	348745	313596	330997	517699	269399	755895
High	Master Protein	P31040	Succinate dehydrogenase [ubiquinone] flavoprotein subunit, mitochondrial OS=Homo sapiens OX=9606 GN=SDHA PE=1 SV=2	3	2	7	2	72.6	SDHA	165621		209768	77656	344353	225993
High	Master Protein	O75828	Carbonyl reductase [NADPH] 3 OS=Homo sapiens OX=9606 GN=CBR3 PE=1 SV=3	13	3	7	3	30.8	CBR3	129020		179745	321113	469986	557025
High	Master Protein	Q16643	Drebrin OS=Homo sapiens OX=9606 GN=DBN1 PE=1 SV=4	8	3	7	3	71.4	DBN1	435707	309285	450634	1.07905e+06	458332	1.26324e+06
High	Master Protein	P07737	Profilin-1 OS=Homo sapiens OX=9606 GN=PFN1 PE=1 SV=2	16	2	7	2	15	PFN1	37803.5	56463.2	91387.9	326551	669824	711714
High	Master Protein	Q16678	Cytochrome P450 1B1 OS=Homo sapiens OX=9606 GN=CYP1B1 PE=1 SV=2	5	4	7	4	60.8	CYP1B1	1290.75	1280.75	1230.75	383734	391177	387795
High	Master Protein	P19388	DNA-directed RNA polymerases I, II, and III subunit RPABC1 OS=Homo sapiens OX=9606 GN=POLR2E PE=1 SV=4	8	2	7	2	24.5	POLR2E	635598	637984	522456	267611	155113	303154
High	Master Protein	P55786	Puromycin-sensitive aminopeptidase OS=Homo sapiens OX=9606 GN=NPEPPS PE=1 SV=2	4	3	7	3	103.2	NPEPPS	386073	414632	219604	343611	513121	403034
High	Master Protein	Q9Y3D0	Cytosolic iron-sulfur assembly component 2B OS=Homo sapiens OX=9606 GN=CIAO2B PE=1 SV=1	31	3	7	3	17.7	CIAO2B	1.04916e+06	654581	1.03742e+06		32961.2
High	Master Protein	P11177	Pyruvate dehydrogenase E1 component subunit beta, mitochondrial OS=Homo sapiens OX=9606 GN=PDHB PE=1 SV=3	11	3	7	3	39.2	PDHB	333182	396405	320772	156902	279968	331585
High	Master Protein	Q08379	Golgin subfamily A member 2 OS=Homo sapiens OX=9606 GN=GOLGA2 PE=1 SV=3	4	4	7	4	113	GOLGA2	247920	246836	213488
High	Master Protein	Q9Y277	Voltage-dependent anion-selective channel protein 3 OS=Homo sapiens OX=9606 GN=VDAC3 PE=1 SV=1	7	2	7	1	30.6	VDAC3	374525	316194	417448	133117	186136	179017
High	Master Protein	Q5H9R7	Serine/threonine-protein phosphatase 6 regulatory subunit 3 OS=Homo sapiens OX=9606 GN=PPP6R3 PE=1 SV=2	2	2	7	2	97.6	PPP6R3	361357	389801	449288	127907	182957	200388
High	Master Protein	P05062	Fructose-bisphosphate aldolase B OS=Homo sapiens OX=9606 GN=ALDOB PE=1 SV=2	13	4	7	3	39.4	ALDOB					1.62434e+06
High	Master Protein	Q70IA6	MOB kinase activator 2 OS=Homo sapiens OX=9606 GN=MOB2 PE=1 SV=1	8	2	7	2	26.9	MOB2	53094.9			371227	321637	452535
High	Master Protein	P00505	Aspartate aminotransferase, mitochondrial OS=Homo sapiens OX=9606 GN=GOT2 PE=1 SV=3	10	4	7	4	47.5	GOT2		85133.1		308106	850178	407355
High	Master Protein	Q13363	C-terminal-binding protein 1 OS=Homo sapiens OX=9606 GN=CTBP1 PE=1 SV=2	8	4	7	4	47.5	CTBP1	621249	473304	688473	434506	236201	337091
High	Master Protein	P08758	Annexin A5 OS=Homo sapiens OX=9606 GN=ANXA5 PE=1 SV=2	6	2	7	2	35.9	ANXA5	80502.8	133871	84837.6	220764	918328	348876
High	Master Protein	Q3KQU3	MAP7 domain-containing protein 1 OS=Homo sapiens OX=9606 GN=MAP7D1 PE=1 SV=1	5	4	7	4	92.8	MAP7D1	700799	674070	533275
High	Master Protein	P37802	Transgelin-2 OS=Homo sapiens OX=9606 GN=TAGLN2 PE=1 SV=3	23	4	7	4	22.4	TAGLN2		44456.3	177456	276713	434029	487448
High	Master Protein	Q86X55	Histone-arginine methyltransferase CARM1 OS=Homo sapiens OX=9606 GN=CARM1 PE=1 SV=3	5	3	6	3	65.8	CARM1	254545	273566	130626	137104	305767	423481
High	Master Protein	P19387	DNA-directed RNA polymerase II subunit RPB3 OS=Homo sapiens OX=9606 GN=POLR2C PE=1 SV=2	14	3	6	3	31.4	POLR2C	237435	225269	390313	179980	125565	253120
High	Master Protein	P13667	Protein disulfide-isomerase A4 OS=Homo sapiens OX=9606 GN=PDIA4 PE=1 SV=2	7	3	6	3	72.9	PDIA4	120240			383728	279159	591569
High	Master Protein	P00390	Glutathione reductase, mitochondrial OS=Homo sapiens OX=9606 GN=GSR PE=1 SV=2	4	2	6	2	56.2	GSR	156636		225260	390127	232829	534384
High	Master Protein	Q9H0A8	COMM domain-containing protein 4 OS=Homo sapiens OX=9606 GN=COMMD4 PE=1 SV=1	24	3	6	3	21.8	COMMD4	559968	510091	937350
High	Master Protein	P49720	Proteasome subunit beta type-3 OS=Homo sapiens OX=9606 GN=PSMB3 PE=1 SV=2	12	2	6	2	22.9	PSMB3	206846	158363	250415	239090	358281	393958
High	Master Protein	Q9Y2L1	Exosome complex exonuclease RRP44 OS=Homo sapiens OX=9606 GN=DIS3 PE=1 SV=2	4	3	6	3	108.9	DIS3	435183	470670	137462	61760.6		81103.6
High	Master Protein	P11277	Spectrin beta chain, erythrocytic OS=Homo sapiens OX=9606 GN=SPTB PE=1 SV=5	3	5	6	5	246.3	SPTB				67515.3	1.36913e+06
High	Master Protein	P52789	Hexokinase-2 OS=Homo sapiens OX=9606 GN=HK2 PE=1 SV=2	3	3	6	3	102.3	HK2	1.82597e+06	1.91273e+06	1.36774e+06		184316	165288
High	Master Protein	Q9Y4C2	TRPM8 channel-associated factor 1 OS=Homo sapiens OX=9606 GN=TCAF1 PE=1 SV=3	2	2	6	2	102.1	TCAF1	529533	583409	594344			184755
High	Master Protein	Q9H0S4	Probable ATP-dependent RNA helicase DDX47 OS=Homo sapiens OX=9606 GN=DDX47 PE=1 SV=1	5	2	6	2	50.6	DDX47	93316.8	85675		71716.7	38846.8
High	Master Protein	P34897	Serine hydroxymethyltransferase, mitochondrial OS=Homo sapiens OX=9606 GN=SHMT2 PE=1 SV=3	6	3	6	3	56	SHMT2	207515	163652	315859	649167	650791	722453
High	Master Protein	Q9H857	5'-nucleotidase domain-containing protein 2 OS=Homo sapiens OX=9606 GN=NT5DC2 PE=1 SV=1	6	3	6	3	60.7	NT5DC2			35695.4	134368	131444	332711
High	Master Protein	B9A064	Immunoglobulin lambda-like polypeptide 5 OS=Homo sapiens OX=9606 GN=IGLL5 PE=1 SV=2	11	2	6	1	23	IGLL5	668533	178773	379347	1.70572e+06	142765	587531
High	Master Protein	Q9BUJ2	Heterogeneous nuclear ribonucleoprotein U-like protein 1 OS=Homo sapiens OX=9606 GN=HNRNPUL1 PE=1 SV=2	3	3	6	3	95.7	HNRNPUL1	119982		133504	84661.1	46891.5	141864
High	Master Protein	Q6SPF0	Sterile alpha motif domain-containing protein 1 OS=Homo sapiens OX=9606 GN=SAMD1 PE=1 SV=1	3	2	6	2	56	SAMD1	435533	479376	587892
High	Master Protein	P11441	Ubiquitin-like protein 4A OS=Homo sapiens OX=9606 GN=UBL4A PE=1 SV=1	17	3	6	3	17.8	UBL4A	496436	434576	898942
High	Master Protein	P34932	Heat shock 70 kDa protein 4 OS=Homo sapiens OX=9606 GN=HSPA4 PE=1 SV=4	6	4	6	3	94.3	HSPA4	147024	180665	189634	154111
High	Master Protein	O75306	NADH dehydrogenase [ubiquinone] iron-sulfur protein 2, mitochondrial OS=Homo sapiens OX=9606 GN=NDUFS2 PE=1 SV=2	4	2	6	2	52.5	NDUFS2	245279	196726	241478	177617	290350	183749
High	Master Protein	P25788	Proteasome subunit alpha type-3 OS=Homo sapiens OX=9606 GN=PSMA3 PE=1 SV=2	8	2	6	2	28.4	PSMA3	219912	143370	170208	246287	223915	261191
High	Master Protein	Q99873	Protein arginine N-methyltransferase 1 OS=Homo sapiens OX=9606 GN=PRMT1 PE=1 SV=3	6	2	6	2	42.4	PRMT1	515231	452641	564419	893035	616377	1.22819e+06
High	Master Protein	Q92499	ATP-dependent RNA helicase DDX1 OS=Homo sapiens OX=9606 GN=DDX1 PE=1 SV=2	10	5	6	5	82.4	DDX1	101007	61621	284692	107404	65849.8	329213
High	Master Protein	P43307	Translocon-associated protein subunit alpha OS=Homo sapiens OX=9606 GN=SSR1 PE=1 SV=3	7	2	6	2	32.2	SSR1	945835	824259	474196	284466	400526	352441
High	Master Protein	P26639	Threonine--tRNA ligase 1, cytoplasmic OS=Homo sapiens OX=9606 GN=TARS1 PE=1 SV=3	7	5	6	5	83.4	TARS1	677371	646797	736172	128908	300051	37937
High	Master Protein	P51649	Succinate-semialdehyde dehydrogenase, mitochondrial OS=Homo sapiens OX=9606 GN=ALDH5A1 PE=1 SV=2	3	2	6	2	57.2	ALDH5A1	321203	160262	144101	789696	404259	356335
High	Master Protein	Q9UNQ2	Probable dimethyladenosine transferase OS=Homo sapiens OX=9606 GN=DIMT1 PE=1 SV=1	10	3	6	3	35.2	DIMT1	254205	283134	272968			64217
High	Master Protein	Q9UHD1	Cysteine and histidine-rich domain-containing protein 1 OS=Homo sapiens OX=9606 GN=CHORDC1 PE=1 SV=2	9	3	6	3	37.5	CHORDC1	1.58822e+06	1.38044e+06	1.72747e+06	92157.4		62592.4
High	Master Protein	Q96CS3	FAS-associated factor 2 OS=Homo sapiens OX=9606 GN=FAF2 PE=1 SV=2	11	4	6	4	52.6	FAF2	249933	228573	238164		139074	243173
High	Master Protein	P41091	Eukaryotic translation initiation factor 2 subunit 3 OS=Homo sapiens OX=9606 GN=EIF2S3 PE=1 SV=3	7	3	6	3	51.1	EIF2S3	589318	413803	482383			291593
High	Master Protein	P00747	Plasminogen OS=Homo sapiens OX=9606 GN=PLG PE=1 SV=2	2	2	6	2	90.5	PLG	597095	417737	356316	864863	1093946	1.87798e+06
High	Master Protein	Q8WVX9	Fatty acyl-CoA reductase 1 OS=Homo sapiens OX=9606 GN=FAR1 PE=1 SV=1	5	3	6	3	59.3	FAR1	186506	114946	145801	81077.8	45877.6	69873.4
High	Master Protein	P78347	General transcription factor II-I OS=Homo sapiens OX=9606 GN=GTF2I PE=1 SV=2	6	4	6	4	112.3	GTF2I	308999	428350	501726		24133.1	80073.2
High	Master Protein	P10515	Dihydrolipoyllysine-residue acetyltransferase component of pyruvate dehydrogenase complex, mitochondrial OS=Homo sapiens OX=9606 GN=DLAT PE=1 SV=3	6	4	6	4	69	DLAT	66492.8	61791.3	251791	300178	236646	459793
High	Master Protein	Q9Y6C9	Mitochondrial carrier homolog 2 OS=Homo sapiens OX=9606 GN=MTCH2 PE=1 SV=1	5	2	6	2	33.3	MTCH2	528088	478096	526460	173382	376871	236298
High	Master Protein	P62993	Growth factor receptor-bound protein 2 OS=Homo sapiens OX=9606 GN=GRB2 PE=1 SV=1	7	2	6	2	25.2	GRB2	458143	574321		152757	227387
High	Master Protein	P47929	Galectin-7 OS=Homo sapiens OX=9606 GN=LGALS7 PE=1 SV=2	23	3	6	3	15.1	LGALS7; LGALS7B	505373	365613	858995	708593	878476	2.95749e+06
High	Master Protein	P0C0L4	Complement C4-A OS=Homo sapiens OX=9606 GN=C4A PE=1 SV=2	2	2	6	2	192.7	C4A	267962	336467	260757	273783	273995	271034
High	Master Protein	O43592	Exportin-T OS=Homo sapiens OX=9606 GN=XPOT PE=1 SV=2	2	2	6	2	109.9	XPOT	286144	397931	311528	96840.9	77629.6	150124
High	Master Protein	P54105	Methylosome subunit pICln OS=Homo sapiens OX=9606 GN=CLNS1A PE=1 SV=1	16	2	6	2	26.2	CLNS1A	232736			650901	627445	721587
High	Master Protein	Q9Y2J2	Band 4.1-like protein 3 OS=Homo sapiens OX=9606 GN=EPB41L3 PE=1 SV=2	5	4	6	4	120.6	EPB41L3	947872	981297	1.03776e+06	1.66273e+06	864488	1.58518e+06
High	Master Protein	Q1KMD3	Heterogeneous nuclear ribonucleoprotein U-like protein 2 OS=Homo sapiens OX=9606 GN=HNRNPUL2 PE=1 SV=1	2	2	6	2	85.1	HNRNPUL2	212046		387469	467276	244511	442988
High	Master Protein	P46940	Ras GTPase-activating-like protein IQGAP1 OS=Homo sapiens OX=9606 GN=IQGAP1 PE=1 SV=1	2	3	6	3	189.1	IQGAP1	63052.9	163133	135045	99472	124772	49245.8
High	Master Protein	Q13148	TAR DNA-binding protein 43 OS=Homo sapiens OX=9606 GN=TARDBP PE=1 SV=1	7	2	6	2	44.7	TARDBP		252661	459136		183438
High	Master Protein	Q13185	Chromobox protein homolog 3 OS=Homo sapiens OX=9606 GN=CBX3 PE=1 SV=4	22	3	5	3	20.8	CBX3	684328	460149	174996	904210	212276	1.46251e+06
High	Master Protein	P38606	V-type proton ATPase catalytic subunit A OS=Homo sapiens OX=9606 GN=ATP6V1A PE=1 SV=2	4	2	5	2	68.3	ATP6V1A	253832	228338	608663	377103	287030	580056
High	Master Protein	Q99459	Cell division cycle 5-like protein OS=Homo sapiens OX=9606 GN=CDC5L PE=1 SV=2	2	2	5	2	92.2	CDC5L	87347.7	105841	80464.8	68695.7	62400.4	129970
High	Master Protein	P62714	Serine/threonine-protein phosphatase 2A catalytic subunit beta isoform OS=Homo sapiens OX=9606 GN=PPP2CB PE=1 SV=1	6	2	5	2	35.6	PPP2CB	243970	247680	309308	116119	139168	210788
High	Master Protein	Q9NR31	GTP-binding protein SAR1a OS=Homo sapiens OX=9606 GN=SAR1A PE=1 SV=1	16	2	5	2	22.4	SAR1A	128972		271862
High	Master Protein	Q96HC4	PDZ and LIM domain protein 5 OS=Homo sapiens OX=9606 GN=PDLIM5 PE=1 SV=5	6	3	5	3	63.9	PDLIM5	1.14908e+06	1.25646e+06	891621
High	Master Protein	P28288	ATP-binding cassette sub-family D member 3 OS=Homo sapiens OX=9606 GN=ABCD3 PE=1 SV=1	7	4	5	4	75.4	ABCD3	273521	212190	138280
High	Master Protein	P36957	Dihydrolipoyllysine-residue succinyltransferase component of 2-oxoglutarate dehydrogenase complex, mitochondrial OS=Homo sapiens OX=9606 GN=DLST PE=1 SV=4	8	3	5	3	48.7	DLST	211149	161958	144451	166394	377215	215885
High	Master Protein	P31151	Protein S100-A7 OS=Homo sapiens OX=9606 GN=S100A7 PE=1 SV=4	22	2	5	2	11.5	S100A7	62479.3	151182	309938	207761	162597	1.27109e+06
High	Master Protein	Q92974	Rho guanine nucleotide exchange factor 2 OS=Homo sapiens OX=9606 GN=ARHGEF2 PE=1 SV=4	2	3	5	3	111.5	ARHGEF2	441928	520183	388595
High	Master Protein	P54886	Delta-1-pyrroline-5-carboxylate synthase OS=Homo sapiens OX=9606 GN=ALDH18A1 PE=1 SV=2	3	2	5	2	87.2	ALDH18A1	130431	127358	166814	117686	141831	220043
High	Master Protein	P61163	Alpha-centractin OS=Homo sapiens OX=9606 GN=ACTR1A PE=1 SV=1	8	2	5	2	42.6	ACTR1A	228784	104688	495042	596460	282430	961467
High	Master Protein	Q96I24	Far upstream element-binding protein 3 OS=Homo sapiens OX=9606 GN=FUBP3 PE=1 SV=2	3	2	5	2	61.6	FUBP3	458249	359555	367234	218736	142997	222545
High	Master Protein	P29401	Transketolase OS=Homo sapiens OX=9606 GN=TKT PE=1 SV=3	5	3	5	3	67.8	TKT		31011.1	55698	114583	140497	260492
High	Master Protein	P46060	Ran GTPase-activating protein 1 OS=Homo sapiens OX=9606 GN=RANGAP1 PE=1 SV=1	4	2	5	2	63.5	RANGAP1	446253	475022	540547		596539	342311
High	Master Protein	Q96B26	Exosome complex component RRP43 OS=Homo sapiens OX=9606 GN=EXOSC8 PE=1 SV=1	10	2	5	2	30	EXOSC8	101982	175998	192884	249523	157565	435415
High	Master Protein	P15170	Eukaryotic peptide chain release factor GTP-binding subunit ERF3A OS=Homo sapiens OX=9606 GN=GSPT1 PE=1 SV=1	4	2	5	2	55.7	GSPT1	155675	136945	343214	588785	384402	744865
High	Master Protein	P06396	Gelsolin OS=Homo sapiens OX=9606 GN=GSN PE=1 SV=1	5	3	5	3	85.6	GSN				238100	1.92585e+06	249831
High	Master Protein	Q8IWC1	MAP7 domain-containing protein 3 OS=Homo sapiens OX=9606 GN=MAP7D3 PE=1 SV=2	2	2	5	2	98.4	MAP7D3	1.04951e+06	977864	657173
High	Master Protein	Q9H0L4	Cleavage stimulation factor subunit 2 tau variant OS=Homo sapiens OX=9606 GN=CSTF2T PE=1 SV=1	3	2	5	2	64.4	CSTF2T	945577	208142	832593	38687.9	104187	46279.4
High	Master Protein	Q9HCY8	Protein S100-A14 OS=Homo sapiens OX=9606 GN=S100A14 PE=1 SV=1	17	2	5	2	11.7	S100A14	176589	95103.4	323155	173875	259585	395320
High	Master Protein	Q6UB35	Monofunctional C1-tetrahydrofolate synthase, mitochondrial OS=Homo sapiens OX=9606 GN=MTHFD1L PE=1 SV=1	4	4	5	4	105.7	MTHFD1L	148095	193839	405400	525056	161114	699954
High	Master Protein	P0DOX5	Immunoglobulin gamma-1 heavy chain OS=Homo sapiens OX=9606 PE=1 SV=2	8	2	5	1	49.3			70005.4	53061.1	57195		38628.8
High	Master Protein	Q9P0J0	NADH dehydrogenase [ubiquinone] 1 alpha subcomplex subunit 13 OS=Homo sapiens OX=9606 GN=NDUFA13 PE=1 SV=3	19	2	5	2	16.7	NDUFA13	258175	325870	221909	80600.3		145744
High	Master Protein	P50570	Dynamin-2 OS=Homo sapiens OX=9606 GN=DNM2 PE=1 SV=2	3	2	5	2	98	DNM2	109522	104602	144178	57991.3		73282.6
High	Master Protein	O43747	AP-1 complex subunit gamma-1 OS=Homo sapiens OX=9606 GN=AP1G1 PE=1 SV=5	2	2	5	2	91.3	AP1G1	500503	468448	339139
High	Master Protein	P55084	Trifunctional enzyme subunit beta, mitochondrial OS=Homo sapiens OX=9606 GN=HADHB PE=1 SV=3	4	2	5	2	51.3	HADHB		218509			621095
High	Master Protein	P62140	Serine/threonine-protein phosphatase PP1-beta catalytic subunit OS=Homo sapiens OX=9606 GN=PPP1CB PE=1 SV=3	12	3	5	1	37.2	PPP1CB	189429	166061	366664	131893	150042	126649
High	Master Protein	P48047	ATP synthase subunit O, mitochondrial OS=Homo sapiens OX=9606 GN=ATP5PO PE=1 SV=1	12	2	5	2	23.3	ATP5PO	190611	180550	402384	417149	677777	441137
High	Master Protein	Q13616	Cullin-1 OS=Homo sapiens OX=9606 GN=CUL1 PE=1 SV=2	3	3	5	3	89.6	CUL1	432984	366106	712956	149361	100185	136970
High	Master Protein	P30566	Adenylosuccinate lyase OS=Homo sapiens OX=9606 GN=ADSL PE=1 SV=2	5	2	5	2	54.9	ADSL	159870	132834	257856	438146	379562	318865
High	Master Protein	Q9BWF3	RNA-binding protein 4 OS=Homo sapiens OX=9606 GN=RBM4 PE=1 SV=1	12	3	5	3	40.3	RBM4	661690	442626	570397	538908	444687	506553
High	Master Protein	Q9UHX1	Poly(U)-binding-splicing factor PUF60 OS=Homo sapiens OX=9606 GN=PUF60 PE=1 SV=1	7	3	5	3	59.8	PUF60	220575	112686	222427	93638.6	100636	291257
High	Master Protein	Q9Y2X9	Zinc finger protein 281 OS=Homo sapiens OX=9606 GN=ZNF281 PE=1 SV=1	4	3	5	3	96.9	ZNF281	8.34677e+06	7810770	7084428	11105165	10829424	9354302
High	Master Protein	Q9UQE7	Structural maintenance of chromosomes protein 3 OS=Homo sapiens OX=9606 GN=SMC3 PE=1 SV=2	2	3	5	3	141.5	SMC3	218591	243934	125811		78243.3	130996
High	Master Protein	P40937	Replication factor C subunit 5 OS=Homo sapiens OX=9606 GN=RFC5 PE=1 SV=1	13	4	5	4	38.5	RFC5	625023	473254	578769	144867	41363.2	130120
High	Master Protein	Q96QA5	Gasdermin-A OS=Homo sapiens OX=9606 GN=GSDMA PE=1 SV=4	4	2	5	2	49.3	GSDMA	114075		247822	108303	320927	1.97502e+06
High	Master Protein	Q9Y5B9	FACT complex subunit SPT16 OS=Homo sapiens OX=9606 GN=SUPT16H PE=1 SV=1	4	3	5	3	119.8	SUPT16H	105336	165451	113244	87443.2
High	Master Protein	O95347	Structural maintenance of chromosomes protein 2 OS=Homo sapiens OX=9606 GN=SMC2 PE=1 SV=2	3	3	5	3	135.6	SMC2	677960	731191	563190	52564.5
High	Master Protein	O75152	Zinc finger CCCH domain-containing protein 11A OS=Homo sapiens OX=9606 GN=ZC3H11A PE=1 SV=3	7	4	5	4	89.1	ZC3H11A	518537	625427	688787
High	Master Protein	Q15058	Kinesin-like protein KIF14 OS=Homo sapiens OX=9606 GN=KIF14 PE=1 SV=1	1	2	4	2	186.4	KIF14	102334	132629	72045.6
High	Master Protein	Q9UJV9	Probable ATP-dependent RNA helicase DDX41 OS=Homo sapiens OX=9606 GN=DDX41 PE=1 SV=2	5	3	4	3	69.8	DDX41	418806	371831	204126	60212.7		93727.2
High	Master Protein	P52565	Rho GDP-dissociation inhibitor 1 OS=Homo sapiens OX=9606 GN=ARHGDIA PE=1 SV=3	22	3	4	3	23.2	ARHGDIA	486168	584642	874187		159043	271126
High	Master Protein	P39019	Small ribosomal subunit protein eS19 OS=Homo sapiens OX=9606 GN=RPS19 PE=1 SV=2	11	2	4	2	16.1	RPS19	294635	321472	156104	513987	691553	700757
High	Master Protein	P46821	Microtubule-associated protein 1B OS=Homo sapiens OX=9606 GN=MAP1B PE=1 SV=2	1	3	4	3	270.5	MAP1B	211409	241357	110170	184992	196250	139110
High	Master Protein	Q9Y617	Phosphoserine aminotransferase OS=Homo sapiens OX=9606 GN=PSAT1 PE=1 SV=2	5	2	4	2	40.4	PSAT1	177126	156687	198832	101360	106230	127988
High	Master Protein	O15160	DNA-directed RNA polymerases I and III subunit RPAC1 OS=Homo sapiens OX=9606 GN=POLR1C PE=1 SV=1	6	2	4	2	39.2	POLR1C	294337	234334	229119	120542	80935.4	144485
High	Master Protein	Q9Y383	Putative RNA-binding protein Luc7-like 2 OS=Homo sapiens OX=9606 GN=LUC7L2 PE=1 SV=2	8	3	4	3	46.5	LUC7L2	206244		205594	178092	52222.9	708221
High	Master Protein	P59998	Actin-related protein 2/3 complex subunit 4 OS=Homo sapiens OX=9606 GN=ARPC4 PE=1 SV=3	10	2	4	2	19.7	ARPC4	177978	178203	68598.5	360757	628144	446841
High	Master Protein	Q99829	Copine-1 OS=Homo sapiens OX=9606 GN=CPNE1 PE=1 SV=1	6	3	4	3	59	CPNE1	110611	98059.8	121589
High	Master Protein	P20618	Proteasome subunit beta type-1 OS=Homo sapiens OX=9606 GN=PSMB1 PE=1 SV=2	15	3	4	3	26.5	PSMB1	181576	182933	602414	448074	170609	891683
High	Master Protein	O43818	U3 small nucleolar RNA-interacting protein 2 OS=Homo sapiens OX=9606 GN=RRP9 PE=1 SV=1	6	3	4	3	51.8	RRP9	361959	289436	293368	571640	255924	689748
High	Master Protein	P06732	Creatine kinase M-type OS=Homo sapiens OX=9606 GN=CKM PE=1 SV=2	12	3	4	3	43.1	CKM				33280.6	932417
High	Master Protein	Q15036	Sorting nexin-17 OS=Homo sapiens OX=9606 GN=SNX17 PE=1 SV=1	11	3	4	3	52.9	SNX17	111454	95638.5	107155
High	Master Protein	Q14690	Protein RRP5 homolog OS=Homo sapiens OX=9606 GN=PDCD11 PE=1 SV=3	3	4	4	4	208.6	PDCD11	134539	203088	350103
High	Master Protein	Q12904	Aminoacyl tRNA synthase complex-interacting multifunctional protein 1 OS=Homo sapiens OX=9606 GN=AIMP1 PE=1 SV=2	15	3	4	3	34.3	AIMP1	650012	849679	731618
High	Master Protein	Q9Y5K5	Ubiquitin carboxyl-terminal hydrolase isozyme L5 OS=Homo sapiens OX=9606 GN=UCHL5 PE=1 SV=3	5	2	4	2	37.6	UCHL5	362724	329325	275639	73640.7		87007.6
High	Master Protein	A5YKK6	CCR4-NOT transcription complex subunit 1 OS=Homo sapiens OX=9606 GN=CNOT1 PE=1 SV=2	1	2	4	2	266.8	CNOT1	90606.4	249395	267222
High	Master Protein	P21266	Glutathione S-transferase Mu 3 OS=Homo sapiens OX=9606 GN=GSTM3 PE=1 SV=3	10	2	4	1	26.5	GSTM3	147262	101691	145169	214807	106281	237002
High	Master Protein	Q53GQ0	Very-long-chain 3-oxoacyl-CoA reductase OS=Homo sapiens OX=9606 GN=HSD17B12 PE=1 SV=2	6	2	4	2	34.3	HSD17B12	602472	410745	654696	89233.8	89283.3	327813
High	Master Protein	Q9UHB9	Signal recognition particle subunit SRP68 OS=Homo sapiens OX=9606 GN=SRP68 PE=1 SV=2	9	3	4	3	70.7	SRP68	132907	113337	248420
High	Master Protein	O15294	UDP-N-acetylglucosamine--peptide N-acetylglucosaminyltransferase 110 kDa subunit OS=Homo sapiens OX=9606 GN=OGT PE=1 SV=3	4	3	4	3	116.9	OGT	739562	694511	879665	268428	144483
High	Master Protein	P40926	Malate dehydrogenase, mitochondrial OS=Homo sapiens OX=9606 GN=MDH2 PE=1 SV=3	9	3	4	3	35.5	MDH2	312325	223931	422720	658504	1.34337e+06	799988
High	Master Protein	Q96A65	Exocyst complex component 4 OS=Homo sapiens OX=9606 GN=EXOC4 PE=1 SV=1	2	2	4	2	110.4	EXOC4	105207	124705	141156
High	Master Protein	Q15061	WD repeat-containing protein 43 OS=Homo sapiens OX=9606 GN=WDR43 PE=1 SV=3	3	2	4	2	74.8	WDR43	298072	191868	313211	334043	227989	626279
High	Master Protein	O75663	TIP41-like protein OS=Homo sapiens OX=9606 GN=TIPRL PE=1 SV=2	11	3	4	3	31.4	TIPRL	303164	369746	409224	157553	63105.8	148605
High	Master Protein	P02675	Fibrinogen beta chain OS=Homo sapiens OX=9606 GN=FGB PE=1 SV=2	3	2	4	2	55.9	FGB	236857	141318	228010	275187	2.66321e+06	457522
High	Master Protein	P00558	Phosphoglycerate kinase 1 OS=Homo sapiens OX=9606 GN=PGK1 PE=1 SV=3	14	4	4	4	44.6	PGK1	181096	116815	195438	175098	382300	301562
High	Master Protein	Q9P000	COMM domain-containing protein 9 OS=Homo sapiens OX=9606 GN=COMMD9 PE=1 SV=2	14	2	4	2	21.8	COMMD9	271359	204811	392956		18895.3
High	Master Protein	P22695	Cytochrome b-c1 complex subunit 2, mitochondrial OS=Homo sapiens OX=9606 GN=UQCRC2 PE=1 SV=3	7	2	4	2	48.4	UQCRC2	485912	484111	690021	352298	360755	462033
High	Master Protein	Q96EY7	Small ribosomal subunit protein mS39 OS=Homo sapiens OX=9606 GN=PTCD3 PE=1 SV=3	5	3	4	3	78.5	PTCD3				131329	112294
High	Master Protein	P05091	Aldehyde dehydrogenase, mitochondrial OS=Homo sapiens OX=9606 GN=ALDH2 PE=1 SV=2	9	4	4	4	56.3	ALDH2					721073
High	Master Protein	P16615	Sarcoplasmic/endoplasmic reticulum calcium ATPase 2 OS=Homo sapiens OX=9606 GN=ATP2A2 PE=1 SV=1	3	2	4	2	114.7	ATP2A2	183156	175205	206123	76949.9		132813
High	Master Protein	Q96FW1	Ubiquitin thioesterase OTUB1 OS=Homo sapiens OX=9606 GN=OTUB1 PE=1 SV=2	7	2	4	2	31.3	OTUB1	317622	320769	295105	449908	514427
High	Master Protein	O94776	Metastasis-associated protein MTA2 OS=Homo sapiens OX=9606 GN=MTA2 PE=1 SV=1	5	3	4	3	75	MTA2		247943		131484	167996	228020
High	Master Protein	P01040	Cystatin-A OS=Homo sapiens OX=9606 GN=CSTA PE=1 SV=1	27	2	4	2	11	CSTA				186003	83857.3	1.7892e+06
High	Master Protein	O00743	Serine/threonine-protein phosphatase 6 catalytic subunit OS=Homo sapiens OX=9606 GN=PPP6C PE=1 SV=1	7	2	4	2	35.1	PPP6C	294702	160064	250930	132765	67418.3	190680
High	Master Protein	Q15942	Zyxin OS=Homo sapiens OX=9606 GN=ZYX PE=1 SV=1	10	3	4	3	61.2	ZYX	143959	95065.4	392669
High	Master Protein	P46439	Glutathione S-transferase Mu 5 OS=Homo sapiens OX=9606 GN=GSTM5 PE=1 SV=3	8	2	4	1	25.7	GSTM5	176103		190947	590704	2.10473e+06	602594
High	Master Protein	Q93088	Betaine--homocysteine S-methyltransferase 1 OS=Homo sapiens OX=9606 GN=BHMT PE=1 SV=2	9	3	4	3	45	BHMT				89407.2	3.24036e+06
High	Master Protein	P27105	Stomatin OS=Homo sapiens OX=9606 GN=STOM PE=1 SV=3	9	3	4	3	31.7	STOM					765127
High	Master Protein	Q9NZB2	Constitutive coactivator of PPAR-gamma-like protein 1 OS=Homo sapiens OX=9606 GN=FAM120A PE=1 SV=2	2	2	4	2	121.8	FAM120A	57025	82446.7	61817.6	50933	40439.2
High	Master Protein	Q15459	Splicing factor 3A subunit 1 OS=Homo sapiens OX=9606 GN=SF3A1 PE=1 SV=1	2	2	4	2	88.8	SF3A1	4.87295e+06	4.65164e+06	6.22082e+06	9.1448e+06	5.71234e+06	1.24775e+07
High	Master Protein	Q9H583	HEAT repeat-containing protein 1 OS=Homo sapiens OX=9606 GN=HEATR1 PE=1 SV=3	1	2	4	2	242.2	HEATR1	958927	1.16948e+06	756606	1.09109e+06	1.4322e+06
High	Master Protein	Q8N0X7	Spartin OS=Homo sapiens OX=9606 GN=SPART PE=1 SV=1	4	3	4	3	72.8	SPART	358132	318563	460719
High	Master Protein	Q9Y5A9	YTH domain-containing family protein 2 OS=Homo sapiens OX=9606 GN=YTHDF2 PE=1 SV=2	4	2	4	2	62.3	YTHDF2	1.52931e+06	1.09194e+06	1.38317e+06	606255	321636	647908
High	Master Protein	Q14152	Eukaryotic translation initiation factor 3 subunit A OS=Homo sapiens OX=9606 GN=EIF3A PE=1 SV=1	3	3	4	3	166.5	EIF3A	368534	288668	255389	43526.8	109383	127868
High	Master Protein	O94832	Unconventional myosin-Id OS=Homo sapiens OX=9606 GN=MYO1D PE=1 SV=2	2	2	4	2	116.1	MYO1D		77444.7	102505	165472		156722
High	Master Protein	Q9UH99	SUN domain-containing protein 2 OS=Homo sapiens OX=9606 GN=SUN2 PE=1 SV=3	5	3	4	3	80.3	SUN2	72797.6	56457.4		180875	73284.5	490409
High	Master Protein	O15042	U2 snRNP-associated SURP motif-containing protein OS=Homo sapiens OX=9606 GN=U2SURP PE=1 SV=2	3	4	4	4	118.2	U2SURP	249646	278797	238159	504853	191720	473910
High	Master Protein	P63151	Serine/threonine-protein phosphatase 2A 55 kDa regulatory subunit B alpha isoform OS=Homo sapiens OX=9606 GN=PPP2R2A PE=1 SV=1	5	2	4	2	51.7	PPP2R2A	214203	217770		334844	205564	213055
High	Master Protein	Q16891	MICOS complex subunit MIC60 OS=Homo sapiens OX=9606 GN=IMMT PE=1 SV=1	5	3	4	3	83.6	IMMT	543308	538779	821764		151716	225091
High	Master Protein	Q86UX7	Fermitin family homolog 3 OS=Homo sapiens OX=9606 GN=FERMT3 PE=1 SV=1	3	2	3	2	75.9	FERMT3					238278
High	Master Protein	Q13257	Mitotic spindle assembly checkpoint protein MAD2A OS=Homo sapiens OX=9606 GN=MAD2L1 PE=1 SV=1	8	2	3	2	23.5	MAD2L1	1.6007e+06	1.42597e+06	1.49018e+06	704043	473305	689876
High	Master Protein	Q9UKV3	Apoptotic chromatin condensation inducer in the nucleus OS=Homo sapiens OX=9606 GN=ACIN1 PE=1 SV=2	1	2	3	2	151.8	ACIN1				322491	121311	652921
High	Master Protein	Q9H0U3	Magnesium transporter protein 1 OS=Homo sapiens OX=9606 GN=MAGT1 PE=1 SV=1	5	2	3	2	38	MAGT1	1.95849e+06	2189826	1.43353e+06
High	Master Protein	O43683	Mitotic checkpoint serine/threonine-protein kinase BUB1 OS=Homo sapiens OX=9606 GN=BUB1 PE=1 SV=1	3	3	3	3	122.3	BUB1	509626	385756	353675	87259.6		131445
High	Master Protein	Q8WUM0	Nuclear pore complex protein Nup133 OS=Homo sapiens OX=9606 GN=NUP133 PE=1 SV=2	4	3	3	3	128.9	NUP133	263505	363178		59690.7		145617
High	Master Protein	P25786	Proteasome subunit alpha type-1 OS=Homo sapiens OX=9606 GN=PSMA1 PE=1 SV=1	12	3	3	3	29.5	PSMA1	496454	218607	505929	403909	852812	896038
High	Master Protein	Q15181	Inorganic pyrophosphatase OS=Homo sapiens OX=9606 GN=PPA1 PE=1 SV=2	11	2	3	2	32.6	PPA1		318544		230247	139574	297036
High	Master Protein	O60610	Protein diaphanous homolog 1 OS=Homo sapiens OX=9606 GN=DIAPH1 PE=1 SV=2	1	2	3	2	141.3	DIAPH1	339988	351563	450177
High	Master Protein	Q7KZI7	Serine/threonine-protein kinase MARK2 OS=Homo sapiens OX=9606 GN=MARK2 PE=1 SV=2	5	2	3	2	87.9	MARK2		119790	309766
High	Master Protein	Q15370	Elongin-B OS=Homo sapiens OX=9606 GN=ELOB PE=1 SV=1	16	2	3	2	13.1	ELOB	746495	675105	975569	481526	351348	535658
High	Master Protein	P16157	Ankyrin-1 OS=Homo sapiens OX=9606 GN=ANK1 PE=1 SV=3	3	3	3	3	206.1	ANK1					392832
High	Master Protein	Q9Y4W6	AFG3-like protein 2 OS=Homo sapiens OX=9606 GN=AFG3L2 PE=1 SV=2	2	2	3	2	88.5	AFG3L2	238121	119501	99733.4	54300	204915
High	Master Protein	O14579	Coatomer subunit epsilon OS=Homo sapiens OX=9606 GN=COPE PE=1 SV=3	16	2	3	2	34.5	COPE	178590	254127	205515
High	Master Protein	Q9BVJ6	U3 small nucleolar RNA-associated protein 14 homolog A OS=Homo sapiens OX=9606 GN=UTP14A PE=1 SV=1	3	2	3	2	87.9	UTP14A	155008	168194	225627	85878.8		152206
High	Master Protein	Q15269	Periodic tryptophan protein 2 homolog OS=Homo sapiens OX=9606 GN=PWP2 PE=1 SV=2	2	2	3	2	102.4	PWP2	299150	375404	348642	255745	240820	369560
High	Master Protein	P49189	4-trimethylaminobutyraldehyde dehydrogenase OS=Homo sapiens OX=9606 GN=ALDH9A1 PE=1 SV=3	7	3	3	3	53.8	ALDH9A1	281699	284639	190462	450998	432624	360559
High	Master Protein	O95782	AP-2 complex subunit alpha-1 OS=Homo sapiens OX=9606 GN=AP2A1 PE=1 SV=3	2	2	3	2	107.5	AP2A1	122452	144533	124540	115562	282276
High	Master Protein	Q9BT25	HAUS augmin-like complex subunit 8 OS=Homo sapiens OX=9606 GN=HAUS8 PE=1 SV=3	13	2	3	2	44.8	HAUS8	178348	360941	195104
High	Master Protein	P01023	Alpha-2-macroglobulin OS=Homo sapiens OX=9606 GN=A2M PE=1 SV=3	1	2	3	2	163.2	A2M	116391	62203.1	95990	924606	9.90692e+06	297300
High	Master Protein	P17174	Aspartate aminotransferase, cytoplasmic OS=Homo sapiens OX=9606 GN=GOT1 PE=1 SV=3	6	3	3	3	46.2	GOT1				71081.5	197437	80489.2
High	Master Protein	Q13835	Plakophilin-1 OS=Homo sapiens OX=9606 GN=PKP1 PE=1 SV=2	3	2	3	2	82.8	PKP1			343484		256127	537417
High	Master Protein	Q9BXS5	AP-1 complex subunit mu-1 OS=Homo sapiens OX=9606 GN=AP1M1 PE=1 SV=3	9	3	3	3	48.6	AP1M1		237547	388246	106675		209956
High	Master Protein	P11274	Breakpoint cluster region protein OS=Homo sapiens OX=9606 GN=BCR PE=1 SV=2	3	3	3	3	142.7	BCR	577118	791944	300033
High	Master Protein	P57740	Nuclear pore complex protein Nup107 OS=Homo sapiens OX=9606 GN=NUP107 PE=1 SV=1	2	2	3	2	106.3	NUP107	580655	579923	536576	197502	135839
High	Master Protein	P63173	Large ribosomal subunit protein eL38 OS=Homo sapiens OX=9606 GN=RPL38 PE=1 SV=2	36	2	3	2	8.2	RPL38	186041	212501	491540		86081.9	208358
High	Master Protein	P05198	Eukaryotic translation initiation factor 2 subunit 1 OS=Homo sapiens OX=9606 GN=EIF2S1 PE=1 SV=3	6	2	3	2	36.1	EIF2S1	746768	618762	641590	388315	144410	204632
High	Master Protein	Q9BV38	WD repeat-containing protein 18 OS=Homo sapiens OX=9606 GN=WDR18 PE=1 SV=2	4	2	3	2	47.4	WDR18	114561	95723.6	73809.7			67598
High	Master Protein	P02730	Band 3 anion transport protein OS=Homo sapiens OX=9606 GN=SLC4A1 PE=1 SV=3	2	2	3	2	101.7	SLC4A1					259878
High	Master Protein	P15056	Serine/threonine-protein kinase B-raf OS=Homo sapiens OX=9606 GN=BRAF PE=1 SV=4	2	2	3	2	84.4	BRAF	465982	578293	428651
High	Master Protein	P04080	Cystatin-B OS=Homo sapiens OX=9606 GN=CSTB PE=1 SV=2	34	2	3	2	11.1	CSTB	142836	213288	564711	207528	197434	645872
High	Master Protein	P38117	Electron transfer flavoprotein subunit beta OS=Homo sapiens OX=9606 GN=ETFB PE=1 SV=3	11	3	3	3	27.8	ETFB	48409.9				440654
High	Master Protein	P60174	Triosephosphate isomerase OS=Homo sapiens OX=9606 GN=TPI1 PE=1 SV=4	13	3	3	3	26.7	TPI1				485683	756435	661456
High	Master Protein	Q8WWM7	Ataxin-2-like protein OS=Homo sapiens OX=9606 GN=ATXN2L PE=1 SV=2	3	3	3	3	113.3	ATXN2L	321232	188649	307543	236123	137030	216060
High	Master Protein	P02751	Fibronectin OS=Homo sapiens OX=9606 GN=FN1 PE=1 SV=5	1	2	3	2	272.2	FN1			24932.9	27741.7	798917
High	Master Protein	Q8WUM4	Programmed cell death 6-interacting protein OS=Homo sapiens OX=9606 GN=PDCD6IP PE=1 SV=1	3	2	3	2	96	PDCD6IP	258455	161346	139413	113661	196240	143259
High	Master Protein	Q53GS7	mRNA export factor GLE1 OS=Homo sapiens OX=9606 GN=GLE1 PE=1 SV=2	5	2	3	2	79.8	GLE1	66579.8	70750.8	114874
High	Master Protein	Q9UBM7	7-dehydrocholesterol reductase OS=Homo sapiens OX=9606 GN=DHCR7 PE=1 SV=1	3	2	3	2	54.5	DHCR7	211664	92114.8	152316			274243
High	Master Protein	P35613	Basigin OS=Homo sapiens OX=9606 GN=BSG PE=1 SV=2	6	2	3	2	42.2	BSG	899984	653772	693900		229255	266792
High	Master Protein	Q9Y3B7	Large ribosomal subunit protein uL11m OS=Homo sapiens OX=9606 GN=MRPL11 PE=1 SV=1	9	2	3	2	20.7	MRPL11				99142.8	46811.9	245206
High	Master Protein	Q13613	Myotubularin-related protein 1 OS=Homo sapiens OX=9606 GN=MTMR1 PE=1 SV=4	2	2	3	2	74.6	MTMR1	407215	417813	348093	65697.7
High	Master Protein	P62191	26S proteasome regulatory subunit 4 OS=Homo sapiens OX=9606 GN=PSMC1 PE=1 SV=1	7	2	3	2	49.2	PSMC1	201963	178752	86201.9	144668	122932
High	Master Protein	P40616	ADP-ribosylation factor-like protein 1 OS=Homo sapiens OX=9606 GN=ARL1 PE=1 SV=1	11	2	3	2	20.4	ARL1	581651	512620	655049		183388
High	Master Protein	O14776	Transcription elongation regulator 1 OS=Homo sapiens OX=9606 GN=TCERG1 PE=1 SV=2	2	2	3	2	123.8	TCERG1	315731	558661	388813	135093	84960.2	72948.6
High	Master Protein	P46379	Large proline-rich protein BAG6 OS=Homo sapiens OX=9606 GN=BAG6 PE=1 SV=2	3	3	3	3	119.3	BAG6	627626	666943	414047
High	Master Protein	O75223	Gamma-glutamylcyclotransferase OS=Homo sapiens OX=9606 GN=GGCT PE=1 SV=1	10	2	3	2	21	GGCT	145559	121867	160242	133049		1.3508e+06
High	Master Protein	Q9NY12	H/ACA ribonucleoprotein complex subunit 1 OS=Homo sapiens OX=9606 GN=GAR1 PE=1 SV=1	7	2	2	2	22.3	GAR1	131490	130050	121310	152493	101756	280920
High	Master Protein	Q14749	Glycine N-methyltransferase OS=Homo sapiens OX=9606 GN=GNMT PE=1 SV=3	9	2	2	2	32.7	GNMT					59242.2
High	Master Protein	O15226	NF-kappa-B-repressing factor OS=Homo sapiens OX=9606 GN=NKRF PE=1 SV=2	3	2	2	2	77.6	NKRF	125199	87327.2	183042			167674
High	Master Protein	Q99871	HAUS augmin-like complex subunit 7 OS=Homo sapiens OX=9606 GN=HAUS7 PE=1 SV=4	9	2	2	2	39.8	HAUS7	573314	511763	853958	340744		613128
High	Master Protein	P07996	Thrombospondin-1 OS=Homo sapiens OX=9606 GN=THBS1 PE=1 SV=2	2	2	2	2	129.3	THBS1					522383
High	Master Protein	P54819	Adenylate kinase 2, mitochondrial OS=Homo sapiens OX=9606 GN=AK2 PE=1 SV=2	11	2	2	2	26.5	AK2	212026	202086	257910	255000	388960	312574
High	Master Protein	Q8IWX8	Calcium homeostasis endoplasmic reticulum protein OS=Homo sapiens OX=9606 GN=CHERP PE=1 SV=3	2	2	2	2	103.6	CHERP	352471	310652	444684	428302	285737	456583
High	Master Protein	Q9NX00	Transmembrane protein 160 OS=Homo sapiens OX=9606 GN=TMEM160 PE=1 SV=1	9	2	2	2	19.6	TMEM160	149135	222089	524405
High	Master Protein	Q9BSJ8	Extended synaptotagmin-1 OS=Homo sapiens OX=9606 GN=ESYT1 PE=1 SV=1	3	2	2	2	122.8	ESYT1	104013	147507	107251
High	Master Protein	Q15386	Ubiquitin-protein ligase E3C OS=Homo sapiens OX=9606 GN=UBE3C PE=1 SV=3	1	2	2	2	123.8	UBE3C	1.3715e+06	922110	3.32347e+06	1.46848e+06	1.11316e+06	2.63981e+06
High	Master Protein	P54868	Hydroxymethylglutaryl-CoA synthase, mitochondrial OS=Homo sapiens OX=9606 GN=HMGCS2 PE=1 SV=1	4	2	2	2	56.6	HMGCS2					499973
High	Master Protein	P28066	Proteasome subunit alpha type-5 OS=Homo sapiens OX=9606 GN=PSMA5 PE=1 SV=3	8	2	2	2	26.4	PSMA5	305775	200258	232977	191995	257523	268146
High	Master Protein	P14550	Aldo-keto reductase family 1 member A1 OS=Homo sapiens OX=9606 GN=AKR1A1 PE=1 SV=3	7	2	2	2	36.6	AKR1A1					281237
High	Master Protein	O00560	Syntenin-1 OS=Homo sapiens OX=9606 GN=SDCBP PE=1 SV=1	11	2	2	2	32.4	SDCBP	101607	88110.2	261086
High	Master Protein	Q16763	Ubiquitin-conjugating enzyme E2 S OS=Homo sapiens OX=9606 GN=UBE2S PE=1 SV=2	12	2	2	2	23.8	UBE2S	197027	188190	290438	111617		228180
High	Master Protein	P62333	26S proteasome regulatory subunit 10B OS=Homo sapiens OX=9606 GN=PSMC6 PE=1 SV=1	7	2	2	2	44.1	PSMC6	35905.9	53311.4	66413
High	Master Protein	O95299	NADH dehydrogenase [ubiquinone] 1 alpha subcomplex subunit 10, mitochondrial OS=Homo sapiens OX=9606 GN=NDUFA10 PE=1 SV=1	5	2	2	2	40.7	NDUFA10	571522	144747	1.09403e+06	105368		1.48551e+06
High	Master Protein	Q00013	55 kDa erythrocyte membrane protein OS=Homo sapiens OX=9606 GN=MPP1 PE=1 SV=2	5	2	2	2	52.3	MPP1	78246.1				101676
High	Master Protein	O60832	H/ACA ribonucleoprotein complex subunit DKC1 OS=Homo sapiens OX=9606 GN=DKC1 PE=1 SV=3	6	2	2	2	57.6	DKC1	115933	144895	211656	203201	112682	309727
High	Master Protein	Q6P1M0	Long-chain fatty acid transport protein 4 OS=Homo sapiens OX=9606 GN=SLC27A4 PE=1 SV=1	2	2	2	2	72	SLC27A4	174024	148956	240495	63101.4
High	Master Protein	O75489	NADH dehydrogenase [ubiquinone] iron-sulfur protein 3, mitochondrial OS=Homo sapiens OX=9606 GN=NDUFS3 PE=1 SV=1	9	2	2	2	30.2	NDUFS3				1.7903e+06	1.72829e+06	2.94501e+06
High	Master Protein	Q16762	Thiosulfate sulfurtransferase OS=Homo sapiens OX=9606 GN=TST PE=1 SV=4	6	2	2	2	33.4	TST	299186	152726	362239	228229	1.99756e+06	439437
High	Master Protein	Q99661	Kinesin-like protein KIF2C OS=Homo sapiens OX=9606 GN=KIF2C PE=1 SV=2	3	2	2	2	81.3	KIF2C	193237	231941	331380
High	Master Protein	P36871	Phosphoglucomutase-1 OS=Homo sapiens OX=9606 GN=PGM1 PE=1 SV=3	4	2	2	2	61.4	PGM1					105489
High	Master Protein	Q9H3R5	Centromere protein H OS=Homo sapiens OX=9606 GN=CENPH PE=1 SV=1	10	2	2	2	28.5	CENPH		132548	96352.6
High	Master Protein	P02679	Fibrinogen gamma chain OS=Homo sapiens OX=9606 GN=FGG PE=1 SV=3	7	2	2	2	51.5	FGG		83039.6	109139	91093.7	2.16964e+06	257653
High	Master Protein	P51570	Galactokinase OS=Homo sapiens OX=9606 GN=GALK1 PE=1 SV=1	8	2	2	2	42.2	GALK1	127462	174796	210022
High	Master Protein	P00167	Cytochrome b5 OS=Homo sapiens OX=9606 GN=CYB5A PE=1 SV=2	25	2	2	2	15.3	CYB5A					276169
High	Master Protein	P42330	Aldo-keto reductase family 1 member C3 OS=Homo sapiens OX=9606 GN=AKR1C3 PE=1 SV=4	5	2	2	2	36.8	AKR1C3					1.45844e+06
High	Master Protein	Q14574	Desmocollin-3 OS=Homo sapiens OX=9606 GN=DSC3 PE=1 SV=3	3	2	2	2	99.9	DSC3	284726	175804	202097	234593	384797	765963
High	Master Protein	Q969X6	U3 small nucleolar RNA-associated protein 4 homolog OS=Homo sapiens OX=9606 GN=UTP4 PE=1 SV=1	3	2	2	2	76.8	UTP4	181230	172951	232032	112009	132730	389202
High	Master Protein	P04083	Annexin A1 OS=Homo sapiens OX=9606 GN=ANXA1 PE=1 SV=2	6	2	2	2	38.7	ANXA1	194140	126057	472957	287359	288359	437597
High	Master Protein	P54577	Tyrosine--tRNA ligase, cytoplasmic OS=Homo sapiens OX=9606 GN=YARS1 PE=1 SV=4	3	2	2	2	59.1	YARS1	233501	251331	426000
High	Master Protein	P00491	Purine nucleoside phosphorylase OS=Homo sapiens OX=9606 GN=PNP PE=1 SV=2	7	2	2	2	32.1	PNP				55418.8	523104	139810
High	Master Protein	Q96JJ3	Engulfment and cell motility protein 2 OS=Homo sapiens OX=9606 GN=ELMO2 PE=1 SV=2	2	2	2	2	82.6	ELMO2	313021	214278	388298	433560	569525	666169
High	Master Protein	P40925	Malate dehydrogenase, cytoplasmic OS=Homo sapiens OX=9606 GN=MDH1 PE=1 SV=4	7	2	2	2	36.4	MDH1	72846	82035.9	80238.8	104239	606776	105908
High	Master Protein	Q6FI81	Anamorsin OS=Homo sapiens OX=9606 GN=CIAPIN1 PE=1 SV=2	5	2	2	2	33.6	CIAPIN1						225283
High	Master Protein	P07738	Bisphosphoglycerate mutase OS=Homo sapiens OX=9606 GN=BPGM PE=1 SV=2	8	2	2	2	30	BPGM					1.95078e+06
High	Master Protein	P41250	Glycine--tRNA ligase OS=Homo sapiens OX=9606 GN=GARS1 PE=1 SV=3	3	2	2	2	83.1	GARS1	232211	187904	249023	95631.4	112893	110671
High	Master Protein	Q5T4S7	E3 ubiquitin-protein ligase UBR4 OS=Homo sapiens OX=9606 GN=UBR4 PE=1 SV=1	0	2	2	2	573.5	UBR4	221500	193095	316375	197128	104471
High	Master Protein	Q9H6U6	BCAS3 microtubule associated cell migration factor OS=Homo sapiens OX=9606 GN=BCAS3 PE=1 SV=3	2	2	2	2	101.2	BCAS3	96573.7	96305.6	85778.5
High	Master Protein	Q9NNW5	tRNA (34-2'-O)-methyltransferase regulator WDR6 OS=Homo sapiens OX=9606 GN=WDR6 PE=1 SV=1	2	2	2	2	121.6	WDR6	87111.4	108613	116409	27193.1	44370	58315.3
High	Master Protein	P00326	Alcohol dehydrogenase 1C OS=Homo sapiens OX=9606 GN=ADH1C PE=1 SV=2	5	2	2	2	39.8	ADH1C					1.64693e+06
High	Master Protein	P01859	Immunoglobulin heavy constant gamma 2 OS=Homo sapiens OX=9606 GN=IGHG2 PE=1 SV=3	2	1	29	1	43.8	IGHG2	59450368	48235868	40916372	99344520	64176652	90319688
High	Master Protein	O95931	Chromobox protein homolog 7 OS=Homo sapiens OX=9606 GN=CBX7 PE=1 SV=1	3	1	24	1	28.3	CBX7	6.17362e+06	7.45966e+06		2.97512e+06	1.71013e+07	4.17367e+06
High	Master Protein	P05386	Large ribosomal subunit protein P1 OS=Homo sapiens OX=9606 GN=RPLP1 PE=1 SV=1	14	1	19	1	11.5	RPLP1	978639	714588	1.06775e+06	1.07107e+06	704639	2.4998e+06
Medium	Master Protein	O15247	Chloride intracellular channel protein 2 OS=Homo sapiens OX=9606 GN=CLIC2 PE=1 SV=3	6	1	13	1	28.3	CLIC2	12579019	9446460	20768928	15250263	5628689	21713734
High	Master Protein	P25398	Small ribosomal subunit protein eS12 OS=Homo sapiens OX=9606 GN=RPS12 PE=1 SV=3	8	1	13	1	14.5	RPS12	1.24836e+06	1.7952e+06	2.69537e+06	1.67514e+06	1.57243e+06	2.38992e+06
High	Master Protein	P06312	Immunoglobulin kappa variable 4-1 OS=Homo sapiens OX=9606 GN=IGKV4-1 PE=1 SV=1	7	1	13	1	13.4	IGKV4-1	637039	332644	846766	1.55047e+06	908540	2.59876e+06
High	Master Protein	A0A0A0MS14	Immunoglobulin heavy variable 1-45 OS=Homo sapiens OX=9606 GN=IGHV1-45 PE=3 SV=1	9	1	11	1	13.5	IGHV1-45	332189	156287	237975	257835	174408	273885
Medium	Master Protein	Q7Z4V0	Zinc finger protein 438 OS=Homo sapiens OX=9606 GN=ZNF438 PE=1 SV=1	1	1	11	1	91.8	ZNF438	420273	367670	455891	1.01522e+06	522377	828551
High	Master Protein	P23435	Cerebellin-1 OS=Homo sapiens OX=9606 GN=CBLN1 PE=1 SV=1	4	1	8	1	21.1	CBLN1	669620	716810	935441	1272609	1.15501e+06	2.11734e+06
Medium	Master Protein	Q86TJ2	Transcriptional adapter 2-beta OS=Homo sapiens OX=9606 GN=TADA2B PE=1 SV=2	2	1	8	1	48.4	TADA2B	1.07335e+06	688347	1725825	929971	1.49475e+06	4.33527e+06
High	Master Protein	Q9NP78	ABC-type oligopeptide transporter ABCB9 OS=Homo sapiens OX=9606 GN=ABCB9 PE=1 SV=1	1	1	8	1	84.4	ABCB9	300983	248528		443560	4450964	451678
High	Master Protein	P18754	Regulator of chromosome condensation OS=Homo sapiens OX=9606 GN=RCC1 PE=1 SV=1	2	1	7	1	44.9	RCC1	291974	338976	378870	529649	392979	570638
High	Master Protein	Q13155	Aminoacyl tRNA synthase complex-interacting multifunctional protein 2 OS=Homo sapiens OX=9606 GN=AIMP2 PE=1 SV=2	3	1	7	1	35.3	AIMP2	357497	378298	446791	75256.2	39821.2	101744
High	Master Protein	O75792	Ribonuclease H2 subunit A OS=Homo sapiens OX=9606 GN=RNASEH2A PE=1 SV=2	3	1	7	1	33.4	RNASEH2A	1332037	1.0056e+06	1077548	226235	182043	469004
High	Master Protein	Q99460	26S proteasome non-ATPase regulatory subunit 1 OS=Homo sapiens OX=9606 GN=PSMD1 PE=1 SV=2	1	1	6	1	105.8	PSMD1		71515.1	100673	96226.5	98432.8	124233
High	Master Protein	Q8NEY8	Periphilin-1 OS=Homo sapiens OX=9606 GN=PPHLN1 PE=1 SV=2	2	1	6	1	52.7	PPHLN1	299133	280674	236203	288714	275311	268917
High	Master Protein	P28482	Mitogen-activated protein kinase 1 OS=Homo sapiens OX=9606 GN=MAPK1 PE=1 SV=3	3	1	6	1	41.4	MAPK1	241918	199305	207228	218969	266882	279578
High	Master Protein	Q9BRL6	Serine/arginine-rich splicing factor 8 OS=Homo sapiens OX=9606 GN=SRSF8 PE=1 SV=1	3	1	6	1	32.3	SRSF8	1.56291e+06	1.15107e+06	1.32339e+06	560891	422892	923313
High	Master Protein	P08243	Asparagine synthetase [glutamine-hydrolyzing] OS=Homo sapiens OX=9606 GN=ASNS PE=1 SV=4	2	1	6	1	64.3	ASNS	115988	93152.8	80796	84181.1	58147.6	118369
High	Master Protein	P04746	Pancreatic alpha-amylase OS=Homo sapiens OX=9606 GN=AMY2A PE=1 SV=2	2	1	6	1	57.7	AMY2A	235701	250468	331102	294678		877590
High	Master Protein	Q01081	Splicing factor U2AF 35 kDa subunit OS=Homo sapiens OX=9606 GN=U2AF1 PE=1 SV=3	5	1	6	1	27.9	U2AF1	115912	111649	117868	220012	76588.7	169518
Medium	Master Protein	O75122	CLIP-associating protein 2 OS=Homo sapiens OX=9606 GN=CLASP2 PE=1 SV=3	1	1	6	1	141	CLASP2		985823		26068548	39146564	5.83914e+06
High	Master Protein	P46977	Dolichyl-diphosphooligosaccharide--protein glycosyltransferase subunit STT3A OS=Homo sapiens OX=9606 GN=STT3A PE=1 SV=2	1	1	5	1	80.5	STT3A	295724	236687	243074	114035	196775	154332
High	Master Protein	Q14244	Ensconsin OS=Homo sapiens OX=9606 GN=MAP7 PE=1 SV=1	1	1	5	1	84	MAP7	229705	321063	286660	748162	451704	746917
High	Master Protein	Q13283	Ras GTPase-activating protein-binding protein 1 OS=Homo sapiens OX=9606 GN=G3BP1 PE=1 SV=1	2	1	5	1	52.1	G3BP1	497703	445875	552552	87577.3		147002
High	Master Protein	Q9BXX3	Ankyrin repeat domain-containing protein 30A OS=Homo sapiens OX=9606 GN=ANKRD30A PE=1 SV=3	1	1	5	1	158.7	ANKRD30A				1.00065e+06	593501	761401
High	Master Protein	Q99496	E3 ubiquitin-protein ligase RING2 OS=Homo sapiens OX=9606 GN=RNF2 PE=1 SV=1	2	1	5	1	37.6	RNF2	423521	383398	310216	144435	165825	183610
High	Master Protein	O00505	Importin subunit alpha-4 OS=Homo sapiens OX=9606 GN=KPNA3 PE=1 SV=2	1	1	5	1	57.8	KPNA3	930631	1012268	873022	220663	164271	203457
High	Master Protein	P13489	Ribonuclease inhibitor OS=Homo sapiens OX=9606 GN=RNH1 PE=1 SV=2	2	1	5	1	49.9	RNH1	347917	306968	227974		254721	222934
High	Master Protein	Q86X83	COMM domain-containing protein 2 OS=Homo sapiens OX=9606 GN=COMMD2 PE=1 SV=2	4	1	5	1	22.7	COMMD2	396769	384385	384304		49240.7
High	Master Protein	O00264	Membrane-associated progesterone receptor component 1 OS=Homo sapiens OX=9606 GN=PGRMC1 PE=1 SV=3	4	1	5	1	21.7	PGRMC1	228850	208461	220630	156456	318014	226634
High	Master Protein	P28070	Proteasome subunit beta type-4 OS=Homo sapiens OX=9606 GN=PSMB4 PE=1 SV=4	4	1	5	1	29.2	PSMB4			167792	245975	202773	415533
High	Master Protein	Q9Y399	Small ribosomal subunit protein uS2m OS=Homo sapiens OX=9606 GN=MRPS2 PE=1 SV=1	3	1	5	1	33.2	MRPS2	455102	262771	260018	227663	199516	299319
High	Master Protein	P08574	Cytochrome c1, heme protein, mitochondrial OS=Homo sapiens OX=9606 GN=CYC1 PE=1 SV=3	4	1	5	1	35.4	CYC1	263401	218162	334677	172968	187890	237895
High	Master Protein	Q2TAY7	WD40 repeat-containing protein SMU1 OS=Homo sapiens OX=9606 GN=SMU1 PE=1 SV=2	2	1	5	1	57.5	SMU1	228050	166282	150446	110452	112144	184015
High	Master Protein	Q71RC2	La-related protein 4 OS=Homo sapiens OX=9606 GN=LARP4 PE=1 SV=3	2	1	4	1	80.5	LARP4	159226	205406	151937	46679.3		82778.1
High	Master Protein	P04632	Calpain small subunit 1 OS=Homo sapiens OX=9606 GN=CAPNS1 PE=1 SV=1	3	1	4	1	28.3	CAPNS1	257118	206537	223378	141724	188876	321060
High	Master Protein	Q8TED0	U3 small nucleolar RNA-associated protein 15 homolog OS=Homo sapiens OX=9606 GN=UTP15 PE=1 SV=3	2	1	4	1	58.4	UTP15	130377	105507	140954			175751
High	Master Protein	Q9P035	Very-long-chain (3R)-3-hydroxyacyl-CoA dehydratase 3 OS=Homo sapiens OX=9606 GN=HACD3 PE=1 SV=2	4	1	4	1	43.1	HACD3	238306	222505	297302			156581
High	Master Protein	P62314	Small nuclear ribonucleoprotein Sm D1 OS=Homo sapiens OX=9606 GN=SNRPD1 PE=1 SV=1	11	1	4	1	13.3	SNRPD1	188348	347521	471750	308916	333234	516888
High	Master Protein	P62304	Small nuclear ribonucleoprotein E OS=Homo sapiens OX=9606 GN=SNRPE PE=1 SV=1	12	1	4	1	10.8	SNRPE	111641	228359	191681	95815.3	160940	190492
Medium	Master Protein	O95503	Chromobox protein homolog 6 OS=Homo sapiens OX=9606 GN=CBX6 PE=1 SV=1	2	1	4	1	43.9	CBX6		243868		8261901	11639077	2672830
High	Master Protein	Q99720	Sigma non-opioid intracellular receptor 1 OS=Homo sapiens OX=9606 GN=SIGMAR1 PE=1 SV=1	6	1	4	1	25.1	SIGMAR1	150859	187727	156128	274576	288470	257477
High	Master Protein	Q8NBS9	Thioredoxin domain-containing protein 5 OS=Homo sapiens OX=9606 GN=TXNDC5 PE=1 SV=2	2	1	4	1	47.6	TXNDC5				50634.9	41893	107621
High	Master Protein	P63208	S-phase kinase-associated protein 1 OS=Homo sapiens OX=9606 GN=SKP1 PE=1 SV=2	7	1	4	1	18.6	SKP1	355521	542899	654731		123083	363737
High	Master Protein	O14925	Mitochondrial import inner membrane translocase subunit Tim23 OS=Homo sapiens OX=9606 GN=TIMM23 PE=1 SV=1	5	1	4	1	21.9	TIMM23	418500	410278	329743
High	Master Protein	Q6P5R6	Ribosomal protein eL22-like OS=Homo sapiens OX=9606 GN=RPL22L1 PE=1 SV=2	10	1	4	1	14.6	RPL22L1	442491	510267	585514	313072	238553	306339
High	Master Protein	O15269	Serine palmitoyltransferase 1 OS=Homo sapiens OX=9606 GN=SPTLC1 PE=1 SV=1	3	1	4	1	52.7	SPTLC1	209229	189297	228177	189360	137394	188151
High	Master Protein	Q9HB07	MYG1 exonuclease OS=Homo sapiens OX=9606 GN=MYG1 PE=1 SV=3	3	1	4	1	42.5		195415	144293		263443	199203	355321
High	Master Protein	Q9BXP5	Serrate RNA effector molecule homolog OS=Homo sapiens OX=9606 GN=SRRT PE=1 SV=1	1	1	4	1	100.6	SRRT	94406.1	133670	81411.3	123063	90345.8	149633
High	Master Protein	Q9Y3Y2	Chromatin target of PRMT1 protein OS=Homo sapiens OX=9606 GN=CHTOP PE=1 SV=2	5	1	4	1	26.4	CHTOP	97417.8	112328	245593	200584	92414.5	216743
Medium	Master Protein	P61289	Proteasome activator complex subunit 3 OS=Homo sapiens OX=9606 GN=PSME3 PE=1 SV=1	3	1	4	1	29.5	PSME3	256934	253842	194694	268062	287109	283148
High	Master Protein	Q16610	Extracellular matrix protein 1 OS=Homo sapiens OX=9606 GN=ECM1 PE=1 SV=2	2	1	4	1	60.6	ECM1	288133	261846	278956	624285	328547	555296
High	Master Protein	P47914	Large ribosomal subunit protein eL29 OS=Homo sapiens OX=9606 GN=RPL29 PE=1 SV=2	9	1	4	1	17.7	RPL29	108868		233228	423493	131377	956222
High	Master Protein	A0A0C4DH31	Immunoglobulin heavy variable 1-18 OS=Homo sapiens OX=9606 GN=IGHV1-18 PE=3 SV=1	9	1	4	1	12.8	IGHV1-18	778044	367230	693122	782919	560314	1.32184e+06
Medium	Master Protein	Q99961	Endophilin-A2 OS=Homo sapiens OX=9606 GN=SH3GL1 PE=1 SV=1	2	1	3	1	41.5	SH3GL1	234563	253225	337154	417716	234211	343734
Medium	Master Protein	P20132	L-serine dehydratase/L-threonine deaminase OS=Homo sapiens OX=9606 GN=SDS PE=1 SV=2	3	1	3	1	34.6	SDS	13608221	13704680	20198516
Medium	Master Protein	Q53FZ2	Acyl-coenzyme A synthetase ACSM3, mitochondrial OS=Homo sapiens OX=9606 GN=ACSM3 PE=1 SV=2	1	1	3	1	66.1	ACSM3	123873	36443	301475	245000	40033.8	668280
High	Master Protein	P43487	Ran-specific GTPase-activating protein OS=Homo sapiens OX=9606 GN=RANBP1 PE=1 SV=1	4	1	3	1	23.3	RANBP1	275053	215169	256000	223412	242149	379383
Medium	Master Protein	Q96T51	RUN and FYVE domain-containing protein 1 OS=Homo sapiens OX=9606 GN=RUFY1 PE=1 SV=2	1	1	3	1	79.8	RUFY1	3.19328e+06	2.83606e+06	2133620
High	Master Protein	Q03393	6-pyruvoyl tetrahydrobiopterin synthase OS=Homo sapiens OX=9606 GN=PTS PE=1 SV=1	6	1	3	1	16.4	PTS				344224	305329	558750
High	Master Protein	Q99848	Probable rRNA-processing protein EBP2 OS=Homo sapiens OX=9606 GN=EBNA1BP2 PE=1 SV=2	3	1	3	1	34.8	EBNA1BP2	403204		112017	181178	220968	408283
High	Master Protein	O75179	Ankyrin repeat domain-containing protein 17 OS=Homo sapiens OX=9606 GN=ANKRD17 PE=1 SV=3	0	1	3	1	274.1	ANKRD17	197046	181748	163116	29305.3
High	Master Protein	Q9UHI6	Probable ATP-dependent RNA helicase DDX20 OS=Homo sapiens OX=9606 GN=DDX20 PE=1 SV=2	2	1	3	1	92.2	DDX20	176102	239290	274259
High	Master Protein	P61962	DDB1- and CUL4-associated factor 7 OS=Homo sapiens OX=9606 GN=DCAF7 PE=1 SV=1	3	1	3	1	38.9	DCAF7	185242	118979	163145
High	Master Protein	Q9Y244	Proteasome maturation protein OS=Homo sapiens OX=9606 GN=POMP PE=1 SV=1	11	1	3	1	15.8	POMP	65031.5	94359.9	107784
Medium	Master Protein	Q9NV79	Protein-L-isoaspartate O-methyltransferase domain-containing protein 2 OS=Homo sapiens OX=9606 GN=PCMTD2 PE=1 SV=2	2	1	3	1	41	PCMTD2	27724544	3.60112e+06	10272905	11297000	8247343	34627252
High	Master Protein	A0A0C4DH55	Immunoglobulin kappa variable 3D-7 OS=Homo sapiens OX=9606 GN=IGKV3D-7 PE=3 SV=5	8	1	3	1	13.1	IGKV3D-7	795496	443496	880871	1.56622e+06	840196	1366351
Medium	Master Protein	Q96CW1	AP-2 complex subunit mu OS=Homo sapiens OX=9606 GN=AP2M1 PE=1 SV=2	2	1	3	1	49.6	AP2M1	346697	228386	217747	84708.5	144009
Medium	Master Protein	Q13057	Bifunctional coenzyme A synthase OS=Homo sapiens OX=9606 GN=COASY PE=1 SV=4	1	1	3	1	62.3	COASY	352317	295778	220504	252023	262639	224113
Medium	Master Protein	Q9NTJ3	Structural maintenance of chromosomes protein 4 OS=Homo sapiens OX=9606 GN=SMC4 PE=1 SV=2	1	1	3	1	147.1	SMC4	246950	325494	204808	114871	96774.1
Medium	Master Protein	Q9UPS8	Ankyrin repeat domain-containing protein 26 OS=Homo sapiens OX=9606 GN=ANKRD26 PE=1 SV=4	1	1	3	1	196.3	ANKRD26	440424	303911	97823.8	667484	951707	761100
Medium	Master Protein	Q68CP4	Heparan-alpha-glucosaminide N-acetyltransferase OS=Homo sapiens OX=9606 GN=HGSNAT PE=1 SV=2	2	1	3	1	73.2	HGSNAT				1.61636e+06	1.89246e+06	1.10977e+06
High	Master Protein	G2XKQ0	Small ubiquitin-related modifier 5 OS=Homo sapiens OX=9606 GN=SUMO1P1 PE=1 SV=2	7	1	3	1	11.5	SUMO1P1	164372	302529		93821.7	135095	120979
High	Master Protein	P15311	Ezrin OS=Homo sapiens OX=9606 GN=EZR PE=1 SV=4	1	1	3	1	69.4	EZR	159980	82639.1	99166.9	90523.3	329079	146917
High	Master Protein	O15131	Importin subunit alpha-6 OS=Homo sapiens OX=9606 GN=KPNA5 PE=1 SV=3	3	1	3	1	60.6	KPNA5	78806.3	59901.3	80567.4	47982.6	38939.3	60308.4
Medium	Master Protein	P15153	Ras-related C3 botulinum toxin substrate 2 OS=Homo sapiens OX=9606 GN=RAC2 PE=1 SV=1	4	1	3	1	21.4	RAC2	320897	415842	302122	222580	565609	405274
High	Master Protein	Q9Y5V3	Melanoma-associated antigen D1 OS=Homo sapiens OX=9606 GN=MAGED1 PE=1 SV=3	1	1	3	1	86.1	MAGED1	69211.5	56905.5	76410.7
High	Master Protein	Q6PGQ7	Protein aurora borealis OS=Homo sapiens OX=9606 GN=BORA PE=1 SV=2	2	1	3	1	61.2	BORA	998517	860326	379502	642201	704928	402853
Medium	Master Protein	Q2TAL8	Transcriptional regulator QRICH1 OS=Homo sapiens OX=9606 GN=QRICH1 PE=1 SV=1	1	1	3	1	86.4	QRICH1	149267	212574	242122	46264.6	31342.9
High	Master Protein	Q9ULX6	A-kinase anchor protein 8-like OS=Homo sapiens OX=9606 GN=AKAP8L PE=1 SV=4	4	1	3	1	71.6	AKAP8L	224041	398701	356759
High	Master Protein	Q09161	Nuclear cap-binding protein subunit 1 OS=Homo sapiens OX=9606 GN=NCBP1 PE=1 SV=1	1	1	3	1	91.8	NCBP1		50396.5		125143	85909.9	198980
High	Master Protein	Q9UQN3	Charged multivesicular body protein 2b OS=Homo sapiens OX=9606 GN=CHMP2B PE=1 SV=1	5	1	3	1	23.9	CHMP2B	329182	227521	360976		836922
High	Master Protein	O00487	26S proteasome non-ATPase regulatory subunit 14 OS=Homo sapiens OX=9606 GN=PSMD14 PE=1 SV=1	2	1	3	1	34.6	PSMD14	323244	372757	376837	254868	315973	384463
High	Master Protein	Q6DKI1	Ribosomal protein uL30-like OS=Homo sapiens OX=9606 GN=RPL7L1 PE=1 SV=2	4	1	3	1	29.7	RPL7L1	384815	444114	388764	254209	272996	202105
High	Master Protein	Q8N6H7	ADP-ribosylation factor GTPase-activating protein 2 OS=Homo sapiens OX=9606 GN=ARFGAP2 PE=1 SV=1	2	1	3	1	56.7	ARFGAP2	289770	219650	193326
High	Master Protein	P78316	Nucleolar protein 14 OS=Homo sapiens OX=9606 GN=NOP14 PE=1 SV=3	1	1	3	1	97.6	NOP14	422418	370123	712359	1.76856e+06	795414
High	Master Protein	P49760	Dual specificity protein kinase CLK2 OS=Homo sapiens OX=9606 GN=CLK2 PE=1 SV=1	2	1	3	1	60.1	CLK2				428236		455461
High	Master Protein	Q01082	Spectrin beta chain, non-erythrocytic 1 OS=Homo sapiens OX=9606 GN=SPTBN1 PE=1 SV=2	0	1	3	1	274.4	SPTBN1	115654	129970	118592	205051	145010	159268
Medium	Master Protein	Q8IVF5	Rho guanine nucleotide exchange factor TIAM2 OS=Homo sapiens OX=9606 GN=TIAM2 PE=2 SV=4	0	1	3	1	190	TIAM2	823707	535456	223598	780050	557167	439517
High	Master Protein	Q9H0B6	Kinesin light chain 2 OS=Homo sapiens OX=9606 GN=KLC2 PE=1 SV=1	2	1	3	1	68.9	KLC2	174162	149169	293853		32185.9
High	Master Protein	Q8NCE2	Myotubularin-related protein 14 OS=Homo sapiens OX=9606 GN=MTMR14 PE=1 SV=2	1	1	3	1	72.2	MTMR14	84853.4	89325.2	70943.1
High	Master Protein	P15927	Replication protein A 32 kDa subunit OS=Homo sapiens OX=9606 GN=RPA2 PE=1 SV=1	4	1	3	1	29.2	RPA2	187373	279195	339106	138778	125669	161156
High	Master Protein	Q15555	Microtubule-associated protein RP/EB family member 2 OS=Homo sapiens OX=9606 GN=MAPRE2 PE=1 SV=1	3	1	3	1	37	MAPRE2	271548	194332	362222
High	Master Protein	Q9Y5Q9	General transcription factor 3C polypeptide 3 OS=Homo sapiens OX=9606 GN=GTF3C3 PE=1 SV=1	1	1	3	1	101.2	GTF3C3	234995	295131	196676
High	Master Protein	Q07812	Apoptosis regulator BAX OS=Homo sapiens OX=9606 GN=BAX PE=1 SV=1	7	1	3	1	21.2	BAX	94787.2	103874	95607.4
High	Master Protein	O43617	Trafficking protein particle complex subunit 3 OS=Homo sapiens OX=9606 GN=TRAPPC3 PE=1 SV=1	4	1	2	1	20.3	TRAPPC3	206823	222977	208403		90391.4	75110.8
High	Master Protein	P13473	Lysosome-associated membrane glycoprotein 2 OS=Homo sapiens OX=9606 GN=LAMP2 PE=1 SV=2	2	1	2	1	44.9	LAMP2	159890	142708		42593.4	65883.5
Medium	Master Protein	Q9UH92	Max-like protein X OS=Homo sapiens OX=9606 GN=MLX PE=1 SV=2	3	1	2	1	33.3	MLX	122185	379093		377533	270783	161161
High	Master Protein	Q99741	Cell division control protein 6 homolog OS=Homo sapiens OX=9606 GN=CDC6 PE=1 SV=1	2	1	2	1	62.7	CDC6	107114	105871	107582
Medium	Master Protein	O43865	S-adenosylhomocysteine hydrolase-like protein 1 OS=Homo sapiens OX=9606 GN=AHCYL1 PE=1 SV=2	2	1	2	1	58.9	AHCYL1	1.36498e+06	1.30707e+06	1.034e+06	2.73255e+06	2.1807e+06	2.68315e+06
High	Master Protein	Q14137	Ribosome biogenesis protein BOP1 OS=Homo sapiens OX=9606 GN=BOP1 PE=1 SV=2	1	1	2	1	83.6	BOP1	437908	544873	518257	576456	400673	567744
High	Master Protein	O43482	Protein Mis18-beta OS=Homo sapiens OX=9606 GN=OIP5 PE=1 SV=2	4	1	2	1	24.7	OIP5	273605	229265
High	Master Protein	P23490	Loricrin OS=Homo sapiens OX=9606 GN=LORICRIN PE=1 SV=2	4	1	2	1	25.7	LORICRIN			95121.2		107573	1896757
High	Master Protein	P61086	Ubiquitin-conjugating enzyme E2 K OS=Homo sapiens OX=9606 GN=UBE2K PE=1 SV=3	5	1	2	1	22.4	UBE2K				165693	198118	323649
High	Master Protein	P11182	Lipoamide acyltransferase component of branched-chain alpha-keto acid dehydrogenase complex, mitochondrial OS=Homo sapiens OX=9606 GN=DBT PE=1 SV=3	2	1	2	1	53.5		286869	160440		7.22304e+06	4.50915e+06	6907429
High	Master Protein	P78318	Immunoglobulin-binding protein 1 OS=Homo sapiens OX=9606 GN=IGBP1 PE=1 SV=1	3	1	2	1	39.2	IGBP1	277879	213460	165741
High	Master Protein	Q08J23	RNA cytosine C(5)-methyltransferase NSUN2 OS=Homo sapiens OX=9606 GN=NSUN2 PE=1 SV=2	1	1	2	1	86.4	NSUN2	190880	171378	177314	114030	111169	161886
High	Master Protein	P49915	GMP synthase [glutamine-hydrolyzing] OS=Homo sapiens OX=9606 GN=GMPS PE=1 SV=1	2	1	2	1	76.7	GMPS				270399	168059	371346
High	Master Protein	Q9Y5R8	Trafficking protein particle complex subunit 1 OS=Homo sapiens OX=9606 GN=TRAPPC1 PE=1 SV=1	6	1	2	1	16.8	TRAPPC1	93461.3	146764	128286		48168.1
Medium	Master Protein	Q9H9F9	Actin-related protein 5 OS=Homo sapiens OX=9606 GN=ACTR5 PE=1 SV=2	1	1	2	1	68.3	ACTR5	132482	140290	184225	723931	7.13658e+06	324768
Medium	Master Protein	Q16890	Tumor protein D53 OS=Homo sapiens OX=9606 GN=TPD52L1 PE=1 SV=1	4	1	2	1	22.4	TPD52L1	184417	218598	188895
Medium	Master Protein	Q8N122	Regulatory-associated protein of mTOR OS=Homo sapiens OX=9606 GN=RPTOR PE=1 SV=1	1	1	2	1	148.9	RPTOR	80648.2	120680
High	Master Protein	P35249	Replication factor C subunit 4 OS=Homo sapiens OX=9606 GN=RFC4 PE=1 SV=2	2	1	2	1	39.7	RFC4	115109	125152	81786.4	46458.9	58783.4	74554.9
High	Master Protein	Q15369	Elongin-C OS=Homo sapiens OX=9606 GN=ELOC PE=1 SV=1	18	1	2	1	12.5	ELOC		918686		4499140		8.30339e+06
High	Master Protein	Q9UM00	Calcium load-activated calcium channel OS=Homo sapiens OX=9606 GN=TMCO1 PE=1 SV=2	6	1	2	1	27.1	TMCO1	76837.9	107206	127847			102032
High	Master Protein	Q6NSI4	RPA-related protein RADX OS=Homo sapiens OX=9606 GN=RADX PE=1 SV=2	1	1	2	1	97.5	RADX	265327	214243	299809
High	Master Protein	O15357	Phosphatidylinositol 3,4,5-trisphosphate 5-phosphatase 2 OS=Homo sapiens OX=9606 GN=INPPL1 PE=1 SV=2	1	1	2	1	138.5	INPPL1	189952	156276
High	Master Protein	Q9P2K5	Myelin expression factor 2 OS=Homo sapiens OX=9606 GN=MYEF2 PE=1 SV=3	2	1	2	1	64.1	MYEF2	71904.3	77412.9	82890.3	93170.9	93336.8	102748
High	Master Protein	P49959	Double-strand break repair protein MRE11 OS=Homo sapiens OX=9606 GN=MRE11 PE=1 SV=3	2	1	2	1	80.5	MRE11	94235.3	97705.9	76006.5
High	Master Protein	Q9H8H0	Nucleolar protein 11 OS=Homo sapiens OX=9606 GN=NOL11 PE=1 SV=1	2	1	2	1	81.1	NOL11	202602	200597	204875
High	Master Protein	P56134	ATP synthase subunit f, mitochondrial OS=Homo sapiens OX=9606 GN=ATP5MF PE=1 SV=3	14	1	2	1	10.9	ATP5MF	189642	342263	293585		57142.2	56228.5
High	Master Protein	P35244	Replication protein A 14 kDa subunit OS=Homo sapiens OX=9606 GN=RPA3 PE=1 SV=1	14	1	2	1	13.6	RPA3		280831			71365.2
High	Master Protein	Q01813	ATP-dependent 6-phosphofructokinase, platelet type OS=Homo sapiens OX=9606 GN=PFKP PE=1 SV=2	1	1	2	1	85.5	PFKP	482249	343746	598475	272374	289691	284048
High	Master Protein	O15511	Actin-related protein 2/3 complex subunit 5 OS=Homo sapiens OX=9606 GN=ARPC5 PE=1 SV=3	8	1	2	1	16.3	ARPC5	726555	710924	920540		271542
High	Master Protein	O00268	Transcription initiation factor TFIID subunit 4 OS=Homo sapiens OX=9606 GN=TAF4 PE=1 SV=2	1	1	2	1	110	TAF4
High	Master Protein	Q9P253	Vacuolar protein sorting-associated protein 18 homolog OS=Homo sapiens OX=9606 GN=VPS18 PE=1 SV=2	1	1	2	1	110.1	VPS18	123173	111021
High	Master Protein	Q9H2G2	STE20-like serine/threonine-protein kinase OS=Homo sapiens OX=9606 GN=SLK PE=1 SV=1	1	1	2	1	142.6	SLK	272975	301382		54110.5
High	Master Protein	Q9BZV1	UBX domain-containing protein 6 OS=Homo sapiens OX=9606 GN=UBXN6 PE=1 SV=1	5	1	2	1	49.7	UBXN6	281257	236202	205006
Medium	Master Protein	Q92890	Ubiquitin recognition factor in ER-associated degradation protein 1 OS=Homo sapiens OX=9606 GN=UFD1 PE=1 SV=3	3	1	2	1	34.5	UFD1	766286	590314	412345
Medium	Master Protein	P51659	Peroxisomal multifunctional enzyme type 2 OS=Homo sapiens OX=9606 GN=HSD17B4 PE=1 SV=3	1	1	2	1	79.6	HSD17B4	86986	111271	103912		84563.8
Medium	Master Protein	P02787	Serotransferrin OS=Homo sapiens OX=9606 GN=TF PE=1 SV=4	2	1	2	1	77	TF	396622	271389	495923	875124	6.29778e+06	680201
High	Master Protein	Q8NBT2	Kinetochore protein Spc24 OS=Homo sapiens OX=9606 GN=SPC24 PE=1 SV=3	4	1	2	1	22.4	SPC24	360935	299412	307360	77343.5	82662.2
High	Master Protein	P45973	Chromobox protein homolog 5 OS=Homo sapiens OX=9606 GN=CBX5 PE=1 SV=1	7	1	2	1	22.2	CBX5				270367	81026.2	389805
High	Master Protein	Q8WUA4	General transcription factor 3C polypeptide 2 OS=Homo sapiens OX=9606 GN=GTF3C2 PE=1 SV=2	1	1	2	1	100.6	GTF3C2	312978	273725	240417	122194	96844
Medium	Master Protein	Q16650	T-box brain protein 1 OS=Homo sapiens OX=9606 GN=TBR1 PE=1 SV=1	2	1	2	1	74	TBR1	411858	728076	609373	81005.6	127590	121536
High	Master Protein	Q9BSU1	Phagosome assembly factor 1 OS=Homo sapiens OX=9606 GN=PHAF1 PE=1 SV=1	2	1	2	1	47.5	PHAF1	71915.1	64474.8	77851.6
High	Master Protein	P35268	Large ribosomal subunit protein eL22 OS=Homo sapiens OX=9606 GN=RPL22 PE=1 SV=2	9	1	2	1	14.8	RPL22	98910.1	172627	349559	231170	289710
High	Master Protein	P08922	Proto-oncogene tyrosine-protein kinase ROS OS=Homo sapiens OX=9606 GN=ROS1 PE=1 SV=3	0	1	2	1	263.7	ROS1	446750	263317	378120	686575	591034	431026
Medium	Master Protein	O75718	Cartilage-associated protein OS=Homo sapiens OX=9606 GN=CRTAP PE=1 SV=1	2	1	2	1	46.5	CRTAP	1.63816e+06	1703210	1.59289e+06	1.19206e+06	6.31761e+06	1.54896e+06
High	Master Protein	P01042	Kininogen-1 OS=Homo sapiens OX=9606 GN=KNG1 PE=1 SV=2	1	1	2	1	71.9	KNG1					1.47323e+06
High	Master Protein	Q96A72	Protein mago nashi homolog 2 OS=Homo sapiens OX=9606 GN=MAGOHB PE=1 SV=1	7	1	2	1	17.3	MAGOHB		175136		307654		431329
High	Master Protein	Q9NVP2	Histone chaperone ASF1B OS=Homo sapiens OX=9606 GN=ASF1B PE=1 SV=1	10	1	2	1	22.4	ASF1B	225558		192368
Medium	Master Protein	Q14684	Ribosomal RNA processing protein 1 homolog B OS=Homo sapiens OX=9606 GN=RRP1B PE=1 SV=3	1	1	2	1	84.4	RRP1B	78077.8	91420.3	122388
High	Master Protein	P31948	Stress-induced-phosphoprotein 1 OS=Homo sapiens OX=9606 GN=STIP1 PE=1 SV=1	2	1	2	1	62.6	STIP1	315343	375743	309664	262205	165078	441088
High	Master Protein	Q9UQ80	Proliferation-associated protein 2G4 OS=Homo sapiens OX=9606 GN=PA2G4 PE=1 SV=3	2	1	2	1	43.8	PA2G4	65012.3	79795.3	108156	61633.1	112221	90649.5
High	Master Protein	O95163	Elongator complex protein 1 OS=Homo sapiens OX=9606 GN=ELP1 PE=1 SV=3	1	1	2	1	150.2	ELP1	271371	251805	172314	112314	108593	100566
High	Master Protein	P06737	Glycogen phosphorylase, liver form OS=Homo sapiens OX=9606 GN=PYGL PE=1 SV=4	1	1	2	1	97.1	PYGL	168995	185678	152188	103540	597187	238716
Medium	Master Protein	P22307	Sterol carrier protein 2 OS=Homo sapiens OX=9606 GN=SCP2 PE=1 SV=2	1	1	2	1	59	SCP2					267613
High	Master Protein	O43809	Cleavage and polyadenylation specificity factor subunit 5 OS=Homo sapiens OX=9606 GN=NUDT21 PE=1 SV=1	8	1	2	1	26.2	NUDT21	118355		204801	230661	181021	341458
High	Master Protein	Q15645	Pachytene checkpoint protein 2 homolog OS=Homo sapiens OX=9606 GN=TRIP13 PE=1 SV=2	2	1	2	1	48.5	TRIP13		211942	246448	114485	107820	141514
High	Master Protein	Q99575	Ribonucleases P/MRP protein subunit POP1 OS=Homo sapiens OX=9606 GN=POP1 PE=1 SV=2	1	1	2	1	114.6	POP1	73544.2	112824	73437
Medium	Master Protein	Q14839	Chromodomain-helicase-DNA-binding protein 4 OS=Homo sapiens OX=9606 GN=CHD4 PE=1 SV=2	0	1	2	1	217.9	CHD4	195057	251814	329657			161001
High	Master Protein	Q6UVJ0	Spindle assembly abnormal protein 6 homolog OS=Homo sapiens OX=9606 GN=SASS6 PE=1 SV=1	2	1	2	1	74.4	SASS6	217094	237024
High	Master Protein	P38432	Coilin OS=Homo sapiens OX=9606 GN=COIL PE=1 SV=1	2	1	2	1	62.6	COIL	217929	226985	201862	85655.5	73798	151157
High	Master Protein	Q9NUL7	Probable ATP-dependent RNA helicase DDX28 OS=Homo sapiens OX=9606 GN=DDX28 PE=1 SV=2	1	1	2	1	59.5	DDX28				50964.8
High	Master Protein	P33121	Long-chain-fatty-acid--CoA ligase 1 OS=Homo sapiens OX=9606 GN=ACSL1 PE=1 SV=1	1	1	2	1	77.9	ACSL1					260157
High	Master Protein	Q5W0B1	ORC ubiquitin ligase 1 OS=Homo sapiens OX=9606 GN=OBI1 PE=1 SV=1	1	1	2	1	81.1	OBI1	344192	301703	235088			97267.9
High	Master Protein	Q4G0F5	Vacuolar protein sorting-associated protein 26B OS=Homo sapiens OX=9606 GN=VPS26B PE=1 SV=2	3	1	1	1	39.1	VPS26B	245033		276592
Medium	Master Protein	P28838	Cytosol aminopeptidase OS=Homo sapiens OX=9606 GN=LAP3 PE=1 SV=3	2	1	1	1	56.1	LAP3	33489.4	30900.4	35723.2		56464.5	34341.7
High	Master Protein	P19823	Inter-alpha-trypsin inhibitor heavy chain H2 OS=Homo sapiens OX=9606 GN=ITIH2 PE=1 SV=2	2	1	1	1	106.4	ITIH2					288698
Medium	Master Protein	Q12769	Nuclear pore complex protein Nup160 OS=Homo sapiens OX=9606 GN=NUP160 PE=1 SV=3	1	1	1	1	162	NUP160	48330.4	53359.4	30011.1
Medium	Master Protein	P12645	Bone morphogenetic protein 3 OS=Homo sapiens OX=9606 GN=BMP3 PE=1 SV=2	1	1	1	1	53.3	BMP3				103390	1.00734e+06
Medium	Master Protein	Q9H3U1	Protein unc-45 homolog A OS=Homo sapiens OX=9606 GN=UNC45A PE=1 SV=1	1	1	1	1	103	UNC45A	495628		297200
Medium	Master Protein	P27816	Microtubule-associated protein 4 OS=Homo sapiens OX=9606 GN=MAP4 PE=1 SV=3	1	1	1	1	120.9	MAP4	281285	162112		189522		211411
Medium	Master Protein	Q9NVQ4	Fas apoptotic inhibitory molecule 1 OS=Homo sapiens OX=9606 GN=FAIM PE=1 SV=1	7	1	1	1	20.2	FAIM	196816	187383	234149
Medium	Master Protein	A4FU01	Myotubularin-related protein 11 OS=Homo sapiens OX=9606 GN=MTMR11 PE=2 SV=2	1	1	1	1	79.5	MTMR11					566048
Medium	Master Protein	Q96ME7	Zinc finger protein 512 OS=Homo sapiens OX=9606 GN=ZNF512 PE=1 SV=2	2	1	1	1	64.6	ZNF512		104944	138960	227088		289162
High	Master Protein	Q8NE71	ATP-binding cassette sub-family F member 1 OS=Homo sapiens OX=9606 GN=ABCF1 PE=1 SV=2	1	1	1	1	95.9	ABCF1	56143.9	66810.4	64060.8		28502.2
High	Master Protein	P0DOX6	Immunoglobulin mu heavy chain OS=Homo sapiens OX=9606 PE=1 SV=2	1	1	1	1	63.4					206377
High	Master Protein	P18669	Phosphoglycerate mutase 1 OS=Homo sapiens OX=9606 GN=PGAM1 PE=1 SV=2	4	1	1	1	28.8	PGAM1			379722	524513	1.23466e+06	928662
High	Master Protein	Q9NV31	U3 small nucleolar ribonucleoprotein protein IMP3 OS=Homo sapiens OX=9606 GN=IMP3 PE=1 SV=1	8	1	1	1	21.8	IMP3	554884	411147	363448		449889	416330
Medium	Master Protein	Q9UJW0	Dynactin subunit 4 OS=Homo sapiens OX=9606 GN=DCTN4 PE=1 SV=1	2	1	1	1	52.3	DCTN4	279745	251018	313763	272980		281405
High	Master Protein	P10155	RNA-binding protein RO60 OS=Homo sapiens OX=9606 GN=RO60 PE=1 SV=2	2	1	1	1	60.6	RO60	125274	74759	107672		39612.1
Medium	Master Protein	O95255	ATP-binding cassette sub-family C member 6 OS=Homo sapiens OX=9606 GN=ABCC6 PE=1 SV=2	1	1	1	1	164.8	ABCC6	216730	146143	583800	886171	170086	2759700
Medium	Master Protein	Q9NVH6	Trimethyllysine dioxygenase, mitochondrial OS=Homo sapiens OX=9606 GN=TMLHE PE=1 SV=1	2	1	1	1	49.5	TMLHE	1.45646e+06	990277	1.22884e+06		1.64093e+06
High	Master Protein	Q9BXW7	Haloacid dehalogenase-like hydrolase domain-containing 5 OS=Homo sapiens OX=9606 GN=HDHD5 PE=1 SV=1	2	1	1	1	46.3	HDHD5	171688	104477	134277	188586	124545
High	Master Protein	P11498	Pyruvate carboxylase, mitochondrial OS=Homo sapiens OX=9606 GN=PC PE=1 SV=2	1	1	1	1	129.6	PC					468572
Medium	Master Protein	Q8N5S1	Mitochondrial carrier protein SCaMC-3L OS=Homo sapiens OX=9606 GN=SLC25A41 PE=2 SV=2	4	1	1	1	40.8	SLC25A41	387405	117935	240185	155050	110518
High	Master Protein	P61513	Large ribosomal subunit protein eL43 OS=Homo sapiens OX=9606 GN=RPL37A PE=1 SV=2	10	1	1	1	10.3	RPL37A	175009	196660	390347	345261	187800	384900
High	Master Protein	O75694	Nuclear pore complex protein Nup155 OS=Homo sapiens OX=9606 GN=NUP155 PE=1 SV=1	1	1	1	1	155.1	NUP155	234041		313783		511890
High	Master Protein	Q92989	Polyribonucleotide 5'-hydroxyl-kinase Clp1 OS=Homo sapiens OX=9606 GN=CLP1 PE=1 SV=1	2	1	1	1	47.6	CLP1	166814	104903	201106		72874.8
Medium	Master Protein	P19971	Thymidine phosphorylase OS=Homo sapiens OX=9606 GN=TYMP PE=1 SV=2	3	1	1	1	49.9	TYMP	447039	480781	367813	602481	586092	361624
High	Master Protein	Q15746	Myosin light chain kinase, smooth muscle OS=Homo sapiens OX=9606 GN=MYLK PE=1 SV=4	0	1	1	1	210.6	MYLK	103316	96356.3			107952
High	Master Protein	Q9NRN7	L-aminoadipate-semialdehyde dehydrogenase-phosphopantetheinyl transferase OS=Homo sapiens OX=9606 GN=AASDHPPT PE=1 SV=2	5	1	1	1	35.8	AASDHPPT	107103	73557.1	85659.6
High	Master Protein	O75629	Protein CREG1 OS=Homo sapiens OX=9606 GN=CREG1 PE=1 SV=1	10	1	1	1	24.1	CREG1						280797
High	Master Protein	P62273	Small ribosomal subunit protein uS14 OS=Homo sapiens OX=9606 GN=RPS29 PE=1 SV=2	14	1	1	1	6.7	RPS29	108867	235547	207801	104841	170717	130477
Medium	Master Protein	Q02252	Methylmalonate-semialdehyde/malonate-semialdehyde dehydrogenase [acylating], mitochondrial OS=Homo sapiens OX=9606 GN=ALDH6A1 PE=1 SV=2	2	1	1	1	57.8	ALDH6A1		41838.9	91771.3		249209
Medium	Master Protein	P61964	WD repeat-containing protein 5 OS=Homo sapiens OX=9606 GN=WDR5 PE=1 SV=1	5	1	1	1	36.6	WDR5	209533	153204	280522	90633.4	72326.4	193368
High	Master Protein	O14929	Histone acetyltransferase type B catalytic subunit OS=Homo sapiens OX=9606 GN=HAT1 PE=1 SV=2	2	1	1	1	49.5	HAT1	220556	148801	307500	174668	92164.1	232915
Medium	Master Protein	Q15020	Squamous cell carcinoma antigen recognized by T-cells 3 OS=Homo sapiens OX=9606 GN=SART3 PE=1 SV=1	1	1	1	1	109.9	SART3	111173	124149	84179.1		105789
High	Master Protein	O75175	CCR4-NOT transcription complex subunit 3 OS=Homo sapiens OX=9606 GN=CNOT3 PE=1 SV=1	3	1	1	1	81.8	CNOT3	370802	301024	359978		84938.5
Medium	Master Protein	Q14145	Kelch-like ECH-associated protein 1 OS=Homo sapiens OX=9606 GN=KEAP1 PE=1 SV=2	2	1	1	1	69.6	KEAP1	157019	146482	99024.7	73336.5
High	Master Protein	O00311	Cell division cycle 7-related protein kinase OS=Homo sapiens OX=9606 GN=CDC7 PE=1 SV=1	2	1	1	1	63.8	CDC7	111216	85540.4
High	Master Protein	Q00266	S-adenosylmethionine synthase isoform type-1 OS=Homo sapiens OX=9606 GN=MAT1A PE=1 SV=2	4	1	1	1	43.6	MAT1A					848701
Medium	Master Protein	Q7Z7M9	Polypeptide N-acetylgalactosaminyltransferase 5 OS=Homo sapiens OX=9606 GN=GALNT5 PE=1 SV=1	1	1	1	1	106.2	GALNT5	279875	277699	166904	444956	541001	252987
High	Master Protein	P53634	Dipeptidyl peptidase 1 OS=Homo sapiens OX=9606 GN=CTSC PE=1 SV=2	3	1	1	1	51.8	CTSC				86629.5	77113.8	280752
High	Master Protein	Q8IUR0	Trafficking protein particle complex subunit 5 OS=Homo sapiens OX=9606 GN=TRAPPC5 PE=1 SV=1	4	1	1	1	20.8	TRAPPC5	208251	208719	181591	127466	120728
High	Master Protein	P10620	Microsomal glutathione S-transferase 1 OS=Homo sapiens OX=9606 GN=MGST1 PE=1 SV=1	10	1	1	1	17.6	MGST1					732069
Medium	Master Protein	P42765	3-ketoacyl-CoA thiolase, mitochondrial OS=Homo sapiens OX=9606 GN=ACAA2 PE=1 SV=2	2	1	1	1	41.9	ACAA2					725771
High	Master Protein	P00441	Superoxide dismutase [Cu-Zn] OS=Homo sapiens OX=9606 GN=SOD1 PE=1 SV=2	6	1	1	1	15.9	SOD1	143607	123998		141295	541618
High	Master Protein	O43324	Eukaryotic translation elongation factor 1 epsilon-1 OS=Homo sapiens OX=9606 GN=EEF1E1 PE=1 SV=1	6	1	1	1	19.8	EEF1E1	237161	230575	223038
Medium	Master Protein	Q8NFD4	Uncharacterized protein FLJ76381 OS=Homo sapiens OX=9606 PE=2 SV=1	5	1	1	1	17						309932
Medium	Master Protein	P23141	Liver carboxylesterase 1 OS=Homo sapiens OX=9606 GN=CES1 PE=1 SV=2	1	1	1	1	62.5	CES1					798929
Medium	Master Protein	Q96DR8	Mucin-like protein 1 OS=Homo sapiens OX=9606 GN=MUCL1 PE=1 SV=1	8	1	1	1	9	MUCL1	140224			101872	122024	415815
High	Master Protein	P62841	Small ribosomal subunit protein uS19 OS=Homo sapiens OX=9606 GN=RPS15 PE=1 SV=2	8	1	1	1	17	RPS15	111435	107574	253112	154653	130117	325494
Medium	Master Protein	O43819	Protein SCO2 homolog, mitochondrial OS=Homo sapiens OX=9606 GN=SCO2 PE=1 SV=3	3	1	1	1	29.8	SCO2	375324	367913	371088	164564	89124.8	177675
Medium	Master Protein	Q96DF8	Splicing factor ESS-2 homolog OS=Homo sapiens OX=9606 GN=ESS2 PE=1 SV=1	2	1	1	1	52.5	ESS2	84916.8	74093.5	65450.9	45642.6
High	Master Protein	Q9P2J5	Leucine--tRNA ligase, cytoplasmic OS=Homo sapiens OX=9606 GN=LARS1 PE=1 SV=2	1	1	1	1	134.4	LARS1	199659	283564	236207	94353.2	72332.4	116129
Medium	Master Protein	P30044	Peroxiredoxin-5, mitochondrial OS=Homo sapiens OX=9606 GN=PRDX5 PE=1 SV=4	5	1	1	1	22.1	PRDX5					515289	268011
High	Master Protein	Q13642	Four and a half LIM domains protein 1 OS=Homo sapiens OX=9606 GN=FHL1 PE=1 SV=4	4	1	1	1	36.2	FHL1				347845	315157	584644
Medium	Master Protein	O00189	AP-4 complex subunit mu-1 OS=Homo sapiens OX=9606 GN=AP4M1 PE=1 SV=2	2	1	1	1	49.9	AP4M1	212229
Medium	Master Protein	Q15404	Ras suppressor protein 1 OS=Homo sapiens OX=9606 GN=RSU1 PE=1 SV=3	3	1	1	1	31.5	RSU1	81249	119212	77993.2		168203
High	Master Protein	P61224	Ras-related protein Rap-1b OS=Homo sapiens OX=9606 GN=RAP1B PE=1 SV=1	6	1	1	1	20.8	RAP1B	185208	183409	260179		733614	407947
High	Master Protein	P35237	Serpin B6 OS=Homo sapiens OX=9606 GN=SERPINB6 PE=1 SV=3	2	1	1	1	42.6	SERPINB6				460406	1125505	561206
High	Master Protein	P50502	Hsc70-interacting protein OS=Homo sapiens OX=9606 GN=ST13 PE=1 SV=2	4	1	1	1	41.3	ST13	245314	263905	282993
High	Master Protein	P01008	Antithrombin-III OS=Homo sapiens OX=9606 GN=SERPINC1 PE=1 SV=1	2	1	1	1	52.6	SERPINC1					186094
Medium	Master Protein	A2RUB1	Meiosis-specific coiled-coil domain-containing protein MEIOC OS=Homo sapiens OX=9606 GN=MEIOC PE=2 SV=3	1	1	1	1	107.5	MEIOC		54015.7		93519.2	464980	378876
High	Master Protein	P10720	Platelet factor 4 variant OS=Homo sapiens OX=9606 GN=PF4V1 PE=1 SV=1	9	1	1	1	11.5	PF4V1					624108
Medium	Master Protein	P00451	Coagulation factor VIII OS=Homo sapiens OX=9606 GN=F8 PE=1 SV=1	1	1	1	1	266.8	F8			329100			163953
Medium	Master Protein	Q7RTV2	Glutathione S-transferase A5 OS=Homo sapiens OX=9606 GN=GSTA5 PE=1 SV=1	4	1	1	1	25.7	GSTA5					1077984
Medium	Master Protein	Q8WVM7	Cohesin subunit SA-1 OS=Homo sapiens OX=9606 GN=STAG1 PE=1 SV=3	1	1	1	1	144.3	STAG1	73786.1	106538	101007	76525.6	69288	91216.7
High	Master Protein	O00411	DNA-directed RNA polymerase, mitochondrial OS=Homo sapiens OX=9606 GN=POLRMT PE=1 SV=2	2	1	1	1	138.5	POLRMT	32814.1	71701.7
Medium	Master Protein	P55769	NHP2-like protein 1 OS=Homo sapiens OX=9606 GN=SNU13 PE=1 SV=3	9	1	1	1	14.2	SNU13	295169	339166	610400	524851	430113	862930
High	Master Protein	Q8NI27	THO complex subunit 2 OS=Homo sapiens OX=9606 GN=THOC2 PE=1 SV=2	1	1	1	1	182.7	THOC2	65636.4	96526	43036.4
Medium	Master Protein	O43293	Death-associated protein kinase 3 OS=Homo sapiens OX=9606 GN=DAPK3 PE=1 SV=1	2	1	1	1	52.5	DAPK3	131884	132237	129296
High	Master Protein	Q9NWB6	Arginine and glutamate-rich protein 1 OS=Homo sapiens OX=9606 GN=ARGLU1 PE=1 SV=1	3	1	1	1	33.2	ARGLU1	97594.3	89319.9	110885	171432	85800.4	228730
Medium	Master Protein	Q13813	Spectrin alpha chain, non-erythrocytic 1 OS=Homo sapiens OX=9606 GN=SPTAN1 PE=1 SV=3	0	1	1	1	284.4	SPTAN1					67648.6
Medium	Master Protein	Q9Y512	Sorting and assembly machinery component 50 homolog OS=Homo sapiens OX=9606 GN=SAMM50 PE=1 SV=3	1	1	1	1	51.9	SAMM50	342667	372265	287690	435241	336715	462801
High	Master Protein	Q6E0U4	Dermokine OS=Homo sapiens OX=9606 GN=DMKN PE=1 SV=3	4	1	1	1	47.1	DMKN	129486	112570	127132			575809
High	Master Protein	A0A0J9YX35	Immunoglobulin heavy variable 3-64D OS=Homo sapiens OX=9606 GN=IGHV3-64D PE=3 SV=1	9	1	1	1	12.8	IGHV3-64D		740825	478401	516783	605255	350345
High	Master Protein	Q13573	SNW domain-containing protein 1 OS=Homo sapiens OX=9606 GN=SNW1 PE=1 SV=1	1	1	1	1	61.5	SNW1				181161	105195	358962
High	Master Protein	O43464	Serine protease HTRA2, mitochondrial OS=Homo sapiens OX=9606 GN=HTRA2 PE=1 SV=2	3	1	1	1	48.8	HTRA2	114852	65195.1	81390.2			107622
High	Master Protein	O43663	Protein regulator of cytokinesis 1 OS=Homo sapiens OX=9606 GN=PRC1 PE=1 SV=2	1	1	1	1	71.6	PRC1	96901.9	144439	76921.4	121776	111073	180698
High	Master Protein	O14735	CDP-diacylglycerol--inositol 3-phosphatidyltransferase OS=Homo sapiens OX=9606 GN=CDIPT PE=1 SV=1	5	1	1	1	23.5	CDIPT	132176	118828	203862			91655.1
Medium	Master Protein	Q9UL12	Sarcosine dehydrogenase, mitochondrial OS=Homo sapiens OX=9606 GN=SARDH PE=1 SV=1	1	1	1	1	101	SARDH	74312.5	47473.8	74797.1		99822.3
High	Master Protein	O75817	Ribonuclease P protein subunit p20 OS=Homo sapiens OX=9606 GN=POP7 PE=1 SV=2	6	1	1	1	15.6	POP7	171321	123326	195080	31812.9
High	Master Protein	P13716	Delta-aminolevulinic acid dehydratase OS=Homo sapiens OX=9606 GN=ALAD PE=1 SV=1	3	1	1	1	36.3	ALAD				66277.1	202802
High	Master Protein	O75531	Barrier-to-autointegration factor OS=Homo sapiens OX=9606 GN=BANF1 PE=1 SV=1	13	1	1	1	10.1	BANF1			37842.8		25328.6	85963.9
Medium	Master Protein	Q9H4I3	TraB domain-containing protein OS=Homo sapiens OX=9606 GN=TRABD PE=1 SV=1	3	1	1	1	42.3	TRABD	806723		1.60132e+06	2.61444e+06	1.06724e+06	1.75783e+06
Medium	Master Protein	P41240	Tyrosine-protein kinase CSK OS=Homo sapiens OX=9606 GN=CSK PE=1 SV=1	2	1	1	1	50.7	CSK	135585	85821.1		161879		269650
Medium	Master Protein	A6NIH7	Protein unc-119 homolog B OS=Homo sapiens OX=9606 GN=UNC119B PE=1 SV=1	4	1	1	1	28.1	UNC119B	74308.3	111383	76625.7
Medium	Master Protein	Q8IYW2	Cilia- and flagella-associated protein 46 OS=Homo sapiens OX=9606 GN=CFAP46 PE=2 SV=3	0	1	1	1	303.3	CFAP46	394658	347417	350869	355774	413012
High	Master Protein	Q9UKF6	Cleavage and polyadenylation specificity factor subunit 3 OS=Homo sapiens OX=9606 GN=CPSF3 PE=1 SV=1	2	1	1	1	77.4	CPSF3	136289	104279	270877	160040	140910	332851
High	Master Protein	Q9UKU0	Long-chain-fatty-acid--CoA ligase 6 OS=Homo sapiens OX=9606 GN=ACSL6 PE=1 SV=4	1	1	1	1	77.7	ACSL6					161044
Medium	Master Protein	Q6KCM7	Mitochondrial adenyl nucleotide antiporter SLC25A25 OS=Homo sapiens OX=9606 GN=SLC25A25 PE=1 SV=1	2	1	1	1	52.6	SLC25A25				7536422	253026192	3.82548e+06
Medium	Master Protein	Q96FE5	Leucine-rich repeat and immunoglobulin-like domain-containing nogo receptor-interacting protein 1 OS=Homo sapiens OX=9606 GN=LINGO1 PE=1 SV=2	3	1	1	1	69.8	LINGO1	3959686	813648	2941916	3.97304e+06	1.73373e+06	6338532
High	Master Protein	O96019	Actin-like protein 6A OS=Homo sapiens OX=9606 GN=ACTL6A PE=1 SV=1	2	1	1	1	47.4	ACTL6A	306025	226700	369265			143106
High	Master Protein	Q92667	A-kinase anchor protein 1, mitochondrial OS=Homo sapiens OX=9606 GN=AKAP1 PE=1 SV=1	1	1	1	1	97.3	AKAP1	160632	116584		247074	265262
High	Master Protein	P48735	Isocitrate dehydrogenase [NADP], mitochondrial OS=Homo sapiens OX=9606 GN=IDH2 PE=1 SV=2	2	1	1	1	50.9	IDH2	61016.7	73255.6	63233.6	79836.4	629154	131659
Medium	Master Protein	Q5JXB2	Putative ubiquitin-conjugating enzyme E2 N-like OS=Homo sapiens OX=9606 GN=UBE2NL PE=1 SV=1	7	1	1	1	17.4	UBE2NL			151825	240436	226717	278911
High	Master Protein	Q7Z5L2	Coiled-coil domain-containing protein R3HCC1L OS=Homo sapiens OX=9606 GN=R3HCC1L PE=1 SV=3	1	1	1	1	87.8	R3HCC1L	66006.7	76967.3	140928	40522.2	75068.5
High	Master Protein	Q5R372	Rab GTPase-activating protein 1-like OS=Homo sapiens OX=9606 GN=RABGAP1L PE=1 SV=1	1	1	1	1	92.5	RABGAP1L	104822	104486	68333.8
High	Master Protein	Q12788	Transducin beta-like protein 3 OS=Homo sapiens OX=9606 GN=TBL3 PE=1 SV=2	2	1	1	1	89	TBL3	86438.4	71382.3	75715.3	49833.8	65399.4	91124.7
High	Master Protein	Q9NQ55	Suppressor of SWI4 1 homolog OS=Homo sapiens OX=9606 GN=PPAN PE=1 SV=1	1	1	1	1	53.2	PPAN	333706	314302	241106	265604	169402	323031
Medium	Master Protein	P20472	Parvalbumin alpha OS=Homo sapiens OX=9606 GN=PVALB PE=1 SV=2	7	1	1	1	12.1	PVALB				131290	957588
High	Master Protein	P07451	Carbonic anhydrase 3 OS=Homo sapiens OX=9606 GN=CA3 PE=1 SV=3	3	1	1	1	29.5	CA3				143267	2562176
Medium	Master Protein	A8MWD9	Putative small nuclear ribonucleoprotein G-like protein 15 OS=Homo sapiens OX=9606 GN=SNRPGP15 PE=5 SV=2	9	1	1	1	8.5	SNRPGP15	118056	196099	306531	197205	287021	333114
High	Master Protein	P56556	NADH dehydrogenase [ubiquinone] 1 alpha subcomplex subunit 6 OS=Homo sapiens OX=9606 GN=NDUFA6 PE=1 SV=4	6	1	1	1	15.1	NDUFA6	126079	176008	160121		104378	56058
High	Master Protein	Q9UDW1	Cytochrome b-c1 complex subunit 9 OS=Homo sapiens OX=9606 GN=UQCR10 PE=1 SV=3	11	1	1	1	7.3	UQCR10					183300
High	Master Protein	Q15390	Mitochondrial fission regulator 1 OS=Homo sapiens OX=9606 GN=MTFR1 PE=1 SV=2	4	1	1	1	37	MTFR1	238755	246777	180708	93660.3
Medium	Master Protein	P31930	Cytochrome b-c1 complex subunit 1, mitochondrial OS=Homo sapiens OX=9606 GN=UQCRC1 PE=1 SV=3	1	1	1	1	52.6	UQCRC1	172349			258068	643534	111274
Medium	Master Protein	Q9UL46	Proteasome activator complex subunit 2 OS=Homo sapiens OX=9606 GN=PSME2 PE=1 SV=4	3	1	1	1	27.4	PSME2	229772	309303	119275	250250	320191	140767
Medium	Master Protein	Q14671	Pumilio homolog 1 OS=Homo sapiens OX=9606 GN=PUM1 PE=1 SV=3	1	1	1	1	126.4	PUM1	161409	131724	186820	160829		178384
High	Master Protein	Q9BWH6	RNA polymerase II-associated protein 1 OS=Homo sapiens OX=9606 GN=RPAP1 PE=1 SV=3	1	1	1	1	152.7	RPAP1	58743.8
High	Master Protein	Q9UBN7	Histone deacetylase 6 OS=Homo sapiens OX=9606 GN=HDAC6 PE=1 SV=2	1	1	1	1	131.3	HDAC6	115615	115227		124724	95648.4	114850
High	Master Protein	O75436	Vacuolar protein sorting-associated protein 26A OS=Homo sapiens OX=9606 GN=VPS26A PE=1 SV=2	4	1	1	1	38.1	VPS26A	194152	137520	157190		174354	198564
Medium	Master Protein	Q8IVL0	Neuron navigator 3 OS=Homo sapiens OX=9606 GN=NAV3 PE=1 SV=3	1	1	1	1	255.5	NAV3	1.97362e+06	1.85949e+06	3.3038e+06	3.99848e+06	2.45687e+06	7.08842e+06
High	Master Protein	Q6RFH5	WD repeat-containing protein 74 OS=Homo sapiens OX=9606 GN=WDR74 PE=1 SV=1	2	1	1	1	42.4	WDR74	84678.9	73856.5	91560.2	191603	70479	104534
High	Master Protein	Q9H4L4	Sentrin-specific protease 3 OS=Homo sapiens OX=9606 GN=SENP3 PE=1 SV=2	2	1	1	1	65	SENP3	96026.5	113420	72893
Medium	Master Protein	O43396	Thioredoxin-like protein 1 OS=Homo sapiens OX=9606 GN=TXNL1 PE=1 SV=3	2	1	1	1	32.2	TXNL1	99179.3	67177.1	106702		132355	89452.6
High	Master Protein	P02649	Apolipoprotein E OS=Homo sapiens OX=9606 GN=APOE PE=1 SV=1	3	1	1	1	36.1	APOE					2.4542e+06
High	Master Protein	P36551	Oxygen-dependent coproporphyrinogen-III oxidase, mitochondrial OS=Homo sapiens OX=9606 GN=CPOX PE=1 SV=3	2	1	1	1	50.1	CPOX	148982	136568	165578
High	Master Protein	Q9NWS0	PIH1 domain-containing protein 1 OS=Homo sapiens OX=9606 GN=PIH1D1 PE=1 SV=1	3	1	1	1	32.3	PIH1D1	131721	109279	143402
Medium	Master Protein	P34896	Serine hydroxymethyltransferase, cytosolic OS=Homo sapiens OX=9606 GN=SHMT1 PE=1 SV=1	2	1	1	1	53	SHMT1					113387
Medium	Master Protein	Q96C19	EF-hand domain-containing protein D2 OS=Homo sapiens OX=9606 GN=EFHD2 PE=1 SV=1	3	1	1	1	26.7	EFHD2	44719.3	42843.6		73967.8	59354.5	119909
High	Master Protein	Q14019	Coactosin-like protein OS=Homo sapiens OX=9606 GN=COTL1 PE=1 SV=3	5	1	1	1	15.9	COTL1				65827.2	387281	65898.1
Medium	Master Protein	P02790	Hemopexin OS=Homo sapiens OX=9606 GN=HPX PE=1 SV=2	2	1	1	1	51.6	HPX					256446
Medium	Master Protein	Q9NVH1	DnaJ homolog subfamily C member 11 OS=Homo sapiens OX=9606 GN=DNAJC11 PE=1 SV=2	1	1	1	1	63.2	DNAJC11	140532	102757
Medium	Master Protein	Q9GZL7	Ribosome biogenesis protein WDR12 OS=Homo sapiens OX=9606 GN=WDR12 PE=1 SV=2	2	1	1	1	47.7	WDR12	291483		240139	465723	194861	455498
High	Master Protein	Q96J01	THO complex subunit 3 OS=Homo sapiens OX=9606 GN=THOC3 PE=1 SV=1	3	1	1	1	38.7	THOC3	167326	113455	136253	164235	78085.2	208064
Medium	Master Protein	P07384	Calpain-1 catalytic subunit OS=Homo sapiens OX=9606 GN=CAPN1 PE=1 SV=1	1	1	1	1	81.8	CAPN1						330179
High	Master Protein	Q9Y6G9	Cytoplasmic dynein 1 light intermediate chain 1 OS=Homo sapiens OX=9606 GN=DYNC1LI1 PE=1 SV=3	2	1	1	1	56.5	DYNC1LI1	134930	106962	127040
High	Master Protein	P52434	DNA-directed RNA polymerases I, II, and III subunit RPABC3 OS=Homo sapiens OX=9606 GN=POLR2H PE=1 SV=4	7	1	1	1	17.1	POLR2H	212197	278969	298328
High	Master Protein	P54727	UV excision repair protein RAD23 homolog B OS=Homo sapiens OX=9606 GN=RAD23B PE=1 SV=1	2	1	1	1	43.1	RAD23B	21239596	10747086	13026479	21455186	20237746	17188322
High	Master Protein	P60981	Destrin OS=Homo sapiens OX=9606 GN=DSTN PE=1 SV=3	7	1	1	1	18.5	DSTN		225774		302195	257847	468856
High	Master Protein	P53680	AP-2 complex subunit sigma OS=Homo sapiens OX=9606 GN=AP2S1 PE=1 SV=2	5	1	1	1	17	AP2S1	372001	366587	327581		292368	175887
High	Master Protein	Q15493	Regucalcin OS=Homo sapiens OX=9606 GN=RGN PE=1 SV=1	6	1	1	1	33.2	RGN					228838
Medium	Master Protein	Q96HW7	Integrator complex subunit 4 OS=Homo sapiens OX=9606 GN=INTS4 PE=1 SV=2	2	1	1	1	108.1	INTS4			138079	211545	97738.6	499713
Medium	Master Protein	P48200	Iron-responsive element-binding protein 2 OS=Homo sapiens OX=9606 GN=IREB2 PE=1 SV=4	1	1	1	1	105	IREB2	373379	223612	403399		445690
High	Master Protein	O15091	Mitochondrial ribonuclease P catalytic subunit OS=Homo sapiens OX=9606 GN=PRORP PE=1 SV=2	2	1	1	1	67.3	PRORP	36865.2	26669.6			12552.2
High	Master Protein	Q99518	Flavin-containing monooxygenase 2 OS=Homo sapiens OX=9606 GN=FMO2 PE=1 SV=5	2	1	1	1	60.9	FMO2					220497
High	Master Protein	O43347	RNA-binding protein Musashi homolog 1 OS=Homo sapiens OX=9606 GN=MSI1 PE=1 SV=1	5	1	1	1	39.1	MSI1	138241		194318
High	Master Protein	Q2NKX8	DNA excision repair protein ERCC-6-like OS=Homo sapiens OX=9606 GN=ERCC6L PE=1 SV=1	1	1	1	1	141	ERCC6L	135450	151293	88257.1			81384.4
High	Master Protein	Q9NSI2	Ribosome biogenesis protein SLX9 homolog OS=Homo sapiens OX=9606 GN=SLX9 PE=1 SV=2	5	1	1	1	25.4	SLX9	148287	166617	521314			101190
High	Master Protein	P09622	Dihydrolipoyl dehydrogenase, mitochondrial OS=Homo sapiens OX=9606 GN=DLD PE=1 SV=2	3	1	1	1	54.1	DLD	78387.4		86131.2			91753.9
High	Master Protein	O75934	Pre-mRNA-splicing factor SPF27 OS=Homo sapiens OX=9606 GN=BCAS2 PE=1 SV=1	6	1	1	1	26.1	BCAS2		142576	344019	251184	92172.4	438291
Medium	Master Protein	Q9Y5Q8	General transcription factor 3C polypeptide 5 OS=Homo sapiens OX=9606 GN=GTF3C5 PE=1 SV=2	2	1	1	1	59.5	GTF3C5	129484	123908	152044			76671.4
High	Master Protein	P15531	Nucleoside diphosphate kinase A OS=Homo sapiens OX=9606 GN=NME1 PE=1 SV=1	40	6	35	1	17.1	NME1
High	Master Protein	P16989	Y-box-binding protein 3 OS=Homo sapiens OX=9606 GN=YBX3 PE=1 SV=4	16	5	22	1	40.1	YBX3
High	Master Protein	P01861	Immunoglobulin heavy constant gamma 4 OS=Homo sapiens OX=9606 GN=IGHG4 PE=1 SV=2	9	2	20	2	43.8	IGHG4
High	Master Protein	P48594	Serpin B4 OS=Homo sapiens OX=9606 GN=SERPINB4 PE=1 SV=2	17	7	20	1	44.8	SERPINB4
High	Master Protein	P08631	Tyrosine-protein kinase HCK OS=Homo sapiens OX=9606 GN=HCK PE=1 SV=5	3	2	18	1	59.6	HCK
High	Master Protein	P11802	Cyclin-dependent kinase 4 OS=Homo sapiens OX=9606 GN=CDK4 PE=1 SV=2	11	3	17	2	33.7	CDK4
High	Master Protein	Q9BQ39	ATP-dependent RNA helicase DDX50 OS=Homo sapiens OX=9606 GN=DDX50 PE=1 SV=1	7	4	15	2	82.5	DDX50
High	Master Protein	O75369	Filamin-B OS=Homo sapiens OX=9606 GN=FLNB PE=1 SV=2	2	5	14	3	278	FLNB
High	Master Protein	Q5T750	Protein KPLCE OS=Homo sapiens OX=9606 GN=KPLCE PE=1 SV=1	3	1	11	1	26.2	KPLCE
High	Master Protein	P47755	F-actin-capping protein subunit alpha-2 OS=Homo sapiens OX=9606 GN=CAPZA2 PE=1 SV=3	6	2	9	1	32.9	CAPZA2
High	Master Protein	P04899	Guanine nucleotide-binding protein G(i) subunit alpha-2 OS=Homo sapiens OX=9606 GN=GNAI2 PE=1 SV=3	7	2	9	1	40.4	GNAI2
High	Master Protein	O14818	Proteasome subunit alpha type-7 OS=Homo sapiens OX=9606 GN=PSMA7 PE=1 SV=1	17	4	9	4	27.9	PSMA7
High	Master Protein	P63010	AP-2 complex subunit beta OS=Homo sapiens OX=9606 GN=AP2B1 PE=1 SV=1	6	5	7	1	104.5	AP2B1
High	Master Protein	Q99426	Tubulin-folding cofactor B OS=Homo sapiens OX=9606 GN=TBCB PE=1 SV=2	13	3	5	3	27.3	TBCB
High	Master Protein	Q14203	Dynactin subunit 1 OS=Homo sapiens OX=9606 GN=DCTN1 PE=1 SV=3	4	4	4	4	141.6	DCTN1
High	Master Protein	P82650	Small ribosomal subunit protein mS22 OS=Homo sapiens OX=9606 GN=MRPS22 PE=1 SV=1	13	3	4	3	41.3	MRPS22
High	Master Protein	Q9BY77	Polymerase delta-interacting protein 3 OS=Homo sapiens OX=9606 GN=POLDIP3 PE=1 SV=2	7	2	4	2	46.1	POLDIP3
High	Master Protein	P40939	Trifunctional enzyme subunit alpha, mitochondrial OS=Homo sapiens OX=9606 GN=HADHA PE=1 SV=2	2	2	4	2	82.9	HADHA
High	Master Protein	P13929	Beta-enolase OS=Homo sapiens OX=9606 GN=ENO3 PE=1 SV=5	7	2	3	1	47	ENO3
High	Master Protein	Q8IW75	Serpin A12 OS=Homo sapiens OX=9606 GN=SERPINA12 PE=1 SV=1	4	2	3	2	47.1	SERPINA12
High	Master Protein	Q96AE4	Far upstream element-binding protein 1 OS=Homo sapiens OX=9606 GN=FUBP1 PE=1 SV=3	2	1	3	1	67.5	FUBP1
High	Master Protein	Q86YP4	Transcriptional repressor p66-alpha OS=Homo sapiens OX=9606 GN=GATAD2A PE=1 SV=1	2	1	3	1	68	GATAD2A
High	Master Protein	Q9Y224	RNA transcription, translation and transport factor protein OS=Homo sapiens OX=9606 GN=RTRAF PE=1 SV=1	17	3	3	3	28.1	RTRAF
High	Master Protein	P35998	26S proteasome regulatory subunit 7 OS=Homo sapiens OX=9606 GN=PSMC2 PE=1 SV=3	9	3	3	3	48.6	PSMC2
High	Master Protein	P22061	Protein-L-isoaspartate(D-aspartate) O-methyltransferase OS=Homo sapiens OX=9606 GN=PCMT1 PE=1 SV=4	11	2	3	2	24.6	PCMT1
High	Master Protein	Q9UN86	Ras GTPase-activating protein-binding protein 2 OS=Homo sapiens OX=9606 GN=G3BP2 PE=1 SV=2	3	1	3	1	54.1	G3BP2
High	Master Protein	O95757	Heat shock 70 kDa protein 4L OS=Homo sapiens OX=9606 GN=HSPA4L PE=1 SV=3	1	1	3	1	94.5	HSPA4L
Medium	Master Protein	P0C7P4	Putative cytochrome b-c1 complex subunit Rieske-like protein 1 OS=Homo sapiens OX=9606 GN=UQCRFS1P1 PE=5 SV=1	3	1	3	1	30.8	UQCRFS1P1
High	Master Protein	Q9HCE1	Helicase MOV-10 OS=Homo sapiens OX=9606 GN=MOV10 PE=1 SV=2	1	1	3	1	113.6	MOV10
High	Master Protein	Q8IXI1	Mitochondrial Rho GTPase 2 OS=Homo sapiens OX=9606 GN=RHOT2 PE=1 SV=2	1	1	3	1	68.1	RHOT2
High	Master Protein	O75955	Flotillin-1 OS=Homo sapiens OX=9606 GN=FLOT1 PE=1 SV=3	4	2	3	2	47.3	FLOT1
High	Master Protein	O75147	Obscurin-like protein 1 OS=Homo sapiens OX=9606 GN=OBSL1 PE=1 SV=4	1	2	3	2	206.8	OBSL1
High	Master Protein	P46777	Large ribosomal subunit protein uL18 OS=Homo sapiens OX=9606 GN=RPL5 PE=1 SV=3	7	2	3	2	34.3	RPL5
High	Master Protein	Q16186	Proteasomal ubiquitin receptor ADRM1 OS=Homo sapiens OX=9606 GN=ADRM1 PE=1 SV=2	4	1	3	1	42.1	ADRM1
High	Master Protein	O96000	NADH dehydrogenase [ubiquinone] 1 beta subcomplex subunit 10 OS=Homo sapiens OX=9606 GN=NDUFB10 PE=1 SV=3	8	1	3	1	20.8	NDUFB10
Medium	Master Protein	P56524	Histone deacetylase 4 OS=Homo sapiens OX=9606 GN=HDAC4 PE=1 SV=3	1	1	3	1	119	HDAC4
Medium	Master Protein	P00374	Dihydrofolate reductase OS=Homo sapiens OX=9606 GN=DHFR PE=1 SV=2	4	1	3	1	21.4	DHFR
Medium	Master Protein	Q9Y580	RNA-binding protein 7 OS=Homo sapiens OX=9606 GN=RBM7 PE=1 SV=1	4	1	3	1	30.5	RBM7
High	Master Protein	Q6NZY4	Zinc finger CCHC domain-containing protein 8 OS=Homo sapiens OX=9606 GN=ZCCHC8 PE=1 SV=2	5	2	3	2	78.5	ZCCHC8
Medium	Master Protein	P24539	ATP synthase F(0) complex subunit B1, mitochondrial OS=Homo sapiens OX=9606 GN=ATP5PB PE=1 SV=2	3	1	2	1	28.9	ATP5PB
High	Master Protein	P28331	NADH-ubiquinone oxidoreductase 75 kDa subunit, mitochondrial OS=Homo sapiens OX=9606 GN=NDUFS1 PE=1 SV=3	4	2	2	2	79.4	NDUFS1
High	Master Protein	P33176	Kinesin-1 heavy chain OS=Homo sapiens OX=9606 GN=KIF5B PE=1 SV=1	2	2	2	2	109.6	KIF5B
High	Master Protein	P98088	Mucin-5AC OS=Homo sapiens OX=9606 GN=MUC5AC PE=1 SV=4	0	2	2	1	585.2	MUC5AC
High	Master Protein	Q86V48	Leucine zipper protein 1 OS=Homo sapiens OX=9606 GN=LUZP1 PE=1 SV=2	2	2	2	2	120.2	LUZP1
High	Master Protein	Q15046	Lysine--tRNA ligase OS=Homo sapiens OX=9606 GN=KARS1 PE=1 SV=3	2	1	2	1	68	KARS1
High	Master Protein	Q96GD4	Aurora kinase B OS=Homo sapiens OX=9606 GN=AURKB PE=1 SV=3	8	2	2	2	39.3	AURKB
High	Master Protein	Q13098	COP9 signalosome complex subunit 1 OS=Homo sapiens OX=9606 GN=GPS1 PE=1 SV=4	3	1	2	1	55.5	GPS1
High	Master Protein	Q9UBQ5	Eukaryotic translation initiation factor 3 subunit K OS=Homo sapiens OX=9606 GN=EIF3K PE=1 SV=1	5	1	2	1	25	EIF3K
High	Master Protein	P14373	Zinc finger protein RFP OS=Homo sapiens OX=9606 GN=TRIM27 PE=1 SV=1	2	1	2	1	58.5	TRIM27
Medium	Master Protein	Q14055	Collagen alpha-2(IX) chain OS=Homo sapiens OX=9606 GN=COL9A2 PE=1 SV=2	1	1	2	1	65.1	COL9A2
High	Master Protein	Q8TDD1	ATP-dependent RNA helicase DDX54 OS=Homo sapiens OX=9606 GN=DDX54 PE=1 SV=2	1	1	2	1	98.5	DDX54
High	Master Protein	Q16513	Serine/threonine-protein kinase N2 OS=Homo sapiens OX=9606 GN=PKN2 PE=1 SV=1	5	2	2	2	112	PKN2
High	Master Protein	Q93009	Ubiquitin carboxyl-terminal hydrolase 7 OS=Homo sapiens OX=9606 GN=USP7 PE=1 SV=2	4	2	2	2	128.2	USP7
High	Master Protein	O00299	Chloride intracellular channel protein 1 OS=Homo sapiens OX=9606 GN=CLIC1 PE=1 SV=4	7	1	2	1	26.9	CLIC1
High	Master Protein	Q8TEQ6	Gem-associated protein 5 OS=Homo sapiens OX=9606 GN=GEMIN5 PE=1 SV=3	1	2	2	2	168.5	GEMIN5
Medium	Master Protein	Q6ZP65	BICD family-like cargo adapter 1 OS=Homo sapiens OX=9606 GN=BICDL1 PE=2 SV=2	2	1	2	1	64.8	BICDL1
High	Master Protein	Q9UNS2	COP9 signalosome complex subunit 3 OS=Homo sapiens OX=9606 GN=COPS3 PE=1 SV=3	2	1	2	1	47.8	COPS3
High	Master Protein	Q9NRG9	Aladin OS=Homo sapiens OX=9606 GN=AAAS PE=1 SV=1	2	1	2	1	59.5	AAAS
High	Master Protein	Q9H9A6	Leucine-rich repeat-containing protein 40 OS=Homo sapiens OX=9606 GN=LRRC40 PE=1 SV=1	3	2	2	2	68.2	LRRC40
High	Master Protein	Q9BYN8	Small ribosomal subunit protein mS26 OS=Homo sapiens OX=9606 GN=MRPS26 PE=1 SV=1	4	1	2	1	24.2	MRPS26
High	Master Protein	Q9NZL4	Hsp70-binding protein 1 OS=Homo sapiens OX=9606 GN=HSPBP1 PE=1 SV=2	3	1	2	1	39.3	HSPBP1
Medium	Master Protein	Q15907	Ras-related protein Rab-11B OS=Homo sapiens OX=9606 GN=RAB11B PE=1 SV=4	4	1	2	1	24.5	RAB11B
Medium	Master Protein	Q9NZT1	Calmodulin-like protein 5 OS=Homo sapiens OX=9606 GN=CALML5 PE=1 SV=2	5	1	2	1	15.9	CALML5
High	Master Protein	Q9Y262	Eukaryotic translation initiation factor 3 subunit L OS=Homo sapiens OX=9606 GN=EIF3L PE=1 SV=1	4	2	2	2	66.7	EIF3L
High	Master Protein	Q86V81	THO complex subunit 4 OS=Homo sapiens OX=9606 GN=ALYREF PE=1 SV=3	4	1	2	1	26.9	ALYREF
High	Master Protein	Q13112	Chromatin assembly factor 1 subunit B OS=Homo sapiens OX=9606 GN=CHAF1B PE=1 SV=1	2	1	2	1	61.5	CHAF1B
High	Master Protein	P49588	Alanine--tRNA ligase, cytoplasmic OS=Homo sapiens OX=9606 GN=AARS1 PE=1 SV=2	2	2	2	2	106.7	AARS1
High	Master Protein	Q9Y3T9	Nucleolar complex protein 2 homolog OS=Homo sapiens OX=9606 GN=NOC2L PE=1 SV=4	1	1	2	1	84.9	NOC2L
Medium	Master Protein	Q9ULC5	Long-chain-fatty-acid--CoA ligase 5 OS=Homo sapiens OX=9606 GN=ACSL5 PE=1 SV=1	1	1	2	1	75.9	ACSL5
Medium	Master Protein	Q9NWB1	RNA binding protein fox-1 homolog 1 OS=Homo sapiens OX=9606 GN=RBFOX1 PE=1 SV=2	3	1	2	1	42.8	RBFOX1
High	Master Protein	Q8TEX9	Importin-4 OS=Homo sapiens OX=9606 GN=IPO4 PE=1 SV=2	3	2	2	2	118.6	IPO4
High	Master Protein	O95071	E3 ubiquitin-protein ligase UBR5 OS=Homo sapiens OX=9606 GN=UBR5 PE=1 SV=2	1	2	2	2	309.2	UBR5
High	Master Protein	A8MV81	HIG1 domain family member 1C OS=Homo sapiens OX=9606 GN=HIGD1C PE=1 SV=2	9	1	2	1	11.1	HIGD1C
High	Master Protein	Q15021	Condensin complex subunit 1 OS=Homo sapiens OX=9606 GN=NCAPD2 PE=1 SV=3	1	1	2	1	157.1	NCAPD2
High	Master Protein	Q9UPN7	Serine/threonine-protein phosphatase 6 regulatory subunit 1 OS=Homo sapiens OX=9606 GN=PPP6R1 PE=1 SV=5	1	1	2	1	96.7	PPP6R1
High	Master Protein	Q9H0W5	Coiled-coil domain-containing protein 8 OS=Homo sapiens OX=9606 GN=CCDC8 PE=1 SV=2	4	1	2	1	59.3	CCDC8
Medium	Master Protein	Q9BXY0	Protein MAK16 homolog OS=Homo sapiens OX=9606 GN=MAK16 PE=1 SV=2	2	1	2	1	35.3	MAK16
Medium	Master Protein	Q8NAF0	Zinc finger protein 579 OS=Homo sapiens OX=9606 GN=ZNF579 PE=1 SV=2	2	1	2	1	60.5	ZNF579
High	Master Protein	Q9UM13	Anaphase-promoting complex subunit 10 OS=Homo sapiens OX=9606 GN=ANAPC10 PE=1 SV=1	6	1	2	1	21.2	ANAPC10
High	Master Protein	Q8WVV4	Protein POF1B OS=Homo sapiens OX=9606 GN=POF1B PE=1 SV=3	2	1	2	1	68	POF1B
High	Master Protein	Q9BPX3	Condensin complex subunit 3 OS=Homo sapiens OX=9606 GN=NCAPG PE=1 SV=1	2	2	2	2	114.3	NCAPG
High	Master Protein	P13995	Bifunctional methylenetetrahydrofolate dehydrogenase/cyclohydrolase, mitochondrial OS=Homo sapiens OX=9606 GN=MTHFD2 PE=1 SV=2	3	1	2	1	37.9	MTHFD2
Medium	Master Protein	Q13601	KRR1 small subunit processome component homolog OS=Homo sapiens OX=9606 GN=KRR1 PE=1 SV=4	2	1	2	1	43.6	KRR1
Medium	Master Protein	P05455	Lupus La protein OS=Homo sapiens OX=9606 GN=SSB PE=1 SV=2	3	1	2	1	46.8	SSB
High	Master Protein	Q13510	Acid ceramidase OS=Homo sapiens OX=9606 GN=ASAH1 PE=1 SV=5	5	2	2	2	44.6	ASAH1
High	Master Protein	Q9H0D6	5'-3' exoribonuclease 2 OS=Homo sapiens OX=9606 GN=XRN2 PE=1 SV=1	2	2	2	2	108.5	XRN2
High	Master Protein	O94927	HAUS augmin-like complex subunit 5 OS=Homo sapiens OX=9606 GN=HAUS5 PE=1 SV=2	3	2	2	2	71.6	HAUS5
High	Master Protein	P17812	CTP synthase 1 OS=Homo sapiens OX=9606 GN=CTPS1 PE=1 SV=2	2	1	2	1	66.6	CTPS1
High	Master Protein	Q07065	Cytoskeleton-associated protein 4 OS=Homo sapiens OX=9606 GN=CKAP4 PE=1 SV=2	1	1	2	1	66	CKAP4
Medium	Master Protein	Q9BSD7	Cancer-related nucleoside-triphosphatase OS=Homo sapiens OX=9606 GN=NTPCR PE=1 SV=1	5	1	2	1	20.7	NTPCR
High	Master Protein	Q9P0J7	E3 ubiquitin-protein ligase KCMF1 OS=Homo sapiens OX=9606 GN=KCMF1 PE=1 SV=2	8	2	2	2	41.9	KCMF1
High	Master Protein	O95969	Secretoglobin family 1D member 2 OS=Homo sapiens OX=9606 GN=SCGB1D2 PE=2 SV=1	10	1	1	1	9.9	SCGB1D2
Medium	Master Protein	P10644	cAMP-dependent protein kinase type I-alpha regulatory subunit OS=Homo sapiens OX=9606 GN=PRKAR1A PE=1 SV=1	4	1	1	1	43	PRKAR1A
Medium	Master Protein	Q9NVI1	Fanconi anemia group I protein OS=Homo sapiens OX=9606 GN=FANCI PE=1 SV=4	1	1	1	1	149.2	FANCI
High	Master Protein	Q9ULM3	YEATS domain-containing protein 2 OS=Homo sapiens OX=9606 GN=YEATS2 PE=1 SV=2	1	1	1	1	150.7	YEATS2
High	Master Protein	Q92621	Nuclear pore complex protein Nup205 OS=Homo sapiens OX=9606 GN=NUP205 PE=1 SV=3	0	1	1	1	227.8	NUP205
Medium	Master Protein	P35251	Replication factor C subunit 1 OS=Homo sapiens OX=9606 GN=RFC1 PE=1 SV=4	1	1	1	1	128.2	RFC1
High	Master Protein	Q8WVV9	Heterogeneous nuclear ribonucleoprotein L-like OS=Homo sapiens OX=9606 GN=HNRNPLL PE=1 SV=1	2	1	1	1	60	HNRNPLL
Medium	Master Protein	Q9H444	Charged multivesicular body protein 4b OS=Homo sapiens OX=9606 GN=CHMP4B PE=1 SV=1	6	1	1	1	24.9	CHMP4B
High	Master Protein	O00159	Unconventional myosin-Ic OS=Homo sapiens OX=9606 GN=MYO1C PE=1 SV=4	1	1	1	1	121.6	MYO1C
Medium	Master Protein	Q08495	Dematin OS=Homo sapiens OX=9606 GN=DMTN PE=1 SV=3	2	1	1	1	45.5	DMTN
High	Master Protein	Q9H223	EH domain-containing protein 4 OS=Homo sapiens OX=9606 GN=EHD4 PE=1 SV=1	2	1	1	1	61.1	EHD4
High	Master Protein	Q9NXE4	Sphingomyelin phosphodiesterase 4 OS=Homo sapiens OX=9606 GN=SMPD4 PE=1 SV=3	1	1	1	1	97.7	SMPD4
High	Master Protein	Q7Z353	Highly divergent homeobox OS=Homo sapiens OX=9606 GN=HDX PE=1 SV=1	1	1	1	1	77.2	HDX
High	Master Protein	Q96DI7	U5 small nuclear ribonucleoprotein 40 kDa protein OS=Homo sapiens OX=9606 GN=SNRNP40 PE=1 SV=1	3	1	1	1	39.3	SNRNP40
High	Master Protein	P49792	E3 SUMO-protein ligase RanBP2 OS=Homo sapiens OX=9606 GN=RANBP2 PE=1 SV=2	0	1	1	1	358	RANBP2
Medium	Master Protein	P11172	Uridine 5'-monophosphate synthase OS=Homo sapiens OX=9606 GN=UMPS PE=1 SV=1	1	1	1	1	52.2	UMPS
High	Master Protein	Q9H1E1	Ribonuclease 7 OS=Homo sapiens OX=9606 GN=RNASE7 PE=1 SV=2	9	1	1	1	17.4	RNASE7
High	Master Protein	P63220	Small ribosomal subunit protein eS21 OS=Homo sapiens OX=9606 GN=RPS21 PE=1 SV=1	12	1	1	1	9.1	RPS21
High	Master Protein	P18206	Vinculin OS=Homo sapiens OX=9606 GN=VCL PE=1 SV=4	1	1	1	1	123.7	VCL
Medium	Master Protein	O00483	Cytochrome c oxidase subunit NDUFA4 OS=Homo sapiens OX=9606 GN=NDUFA4 PE=1 SV=1	10	1	1	1	9.4	NDUFA4
Medium	Master Protein	Q9BYD3	Large ribosomal subunit protein uL4m OS=Homo sapiens OX=9606 GN=MRPL4 PE=1 SV=1	5	1	1	1	34.9	MRPL4
Medium	Master Protein	P43355	Melanoma-associated antigen 1 OS=Homo sapiens OX=9606 GN=MAGEA1 PE=1 SV=1	2	1	1	1	34.3	MAGEA1
High	Master Protein	O15381	Nuclear valosin-containing protein-like OS=Homo sapiens OX=9606 GN=NVL PE=1 SV=1	2	1	1	1	95	NVL
High	Master Protein	Q9NY93	Probable ATP-dependent RNA helicase DDX56 OS=Homo sapiens OX=9606 GN=DDX56 PE=1 SV=1	3	1	1	1	61.6	DDX56
Medium	Master Protein	Q9NTK5	Obg-like ATPase 1 OS=Homo sapiens OX=9606 GN=OLA1 PE=1 SV=2	2	1	1	1	44.7	OLA1
High	Master Protein	Q9BSC4	Nucleolar protein 10 OS=Homo sapiens OX=9606 GN=NOL10 PE=1 SV=1	2	1	1	1	80.3	NOL10
Medium	Master Protein	Q9UK61	Protein TASOR OS=Homo sapiens OX=9606 GN=TASOR PE=1 SV=3	1	1	1	1	188.9	TASOR
High	Master Protein	P30043	Flavin reductase (NADPH) OS=Homo sapiens OX=9606 GN=BLVRB PE=1 SV=3	4	1	1	1	22.1	BLVRB
High	Master Protein	P58340	Myeloid leukemia factor 1 OS=Homo sapiens OX=9606 GN=MLF1 PE=1 SV=1	7	1	1	1	30.6	MLF1
High	Master Protein	P02461	Collagen alpha-1(III) chain OS=Homo sapiens OX=9606 GN=COL3A1 PE=1 SV=4	1	1	1	1	138.5	COL3A1
Medium	Master Protein	Q9ULT8	E3 ubiquitin-protein ligase HECTD1 OS=Homo sapiens OX=9606 GN=HECTD1 PE=1 SV=4	0	1	1	1	289.2	HECTD1
High	Master Protein	O43615	Mitochondrial import inner membrane translocase subunit TIM44 OS=Homo sapiens OX=9606 GN=TIMM44 PE=1 SV=2	3	1	1	1	51.3	TIMM44
High	Master Protein	P41743	Protein kinase C iota type OS=Homo sapiens OX=9606 GN=PRKCI PE=1 SV=2	2	1	1	1	68.2	PRKCI
Medium	Master Protein	Q9UBC5	Unconventional myosin-Ia OS=Homo sapiens OX=9606 GN=MYO1A PE=1 SV=1	1	1	1	1	118.3	MYO1A
High	Master Protein	Q7Z434	Mitochondrial antiviral-signaling protein OS=Homo sapiens OX=9606 GN=MAVS PE=1 SV=2	2	1	1	1	56.5	MAVS
Medium	Master Protein	Q7L0Y3	tRNA methyltransferase 10 homolog C OS=Homo sapiens OX=9606 GN=TRMT10C PE=1 SV=2	2	1	1	1	47.3	TRMT10C
High	Master Protein	Q9NPD3	Exosome complex component RRP41 OS=Homo sapiens OX=9606 GN=EXOSC4 PE=1 SV=3	4	1	1	1	26.4	EXOSC4
Medium	Master Protein	Q9P2I0	Cleavage and polyadenylation specificity factor subunit 2 OS=Homo sapiens OX=9606 GN=CPSF2 PE=1 SV=2	1	1	1	1	88.4	CPSF2
Medium	Master Protein	P52948	Nuclear pore complex protein Nup98-Nup96 OS=Homo sapiens OX=9606 GN=NUP98 PE=1 SV=4	0	1	1	1	197.5	NUP98
High	Master Protein	Q14318	Peptidyl-prolyl cis-trans isomerase FKBP8 OS=Homo sapiens OX=9606 GN=FKBP8 PE=1 SV=2	2	1	1	1	44.5	FKBP8
Medium	Master Protein	P06744	Glucose-6-phosphate isomerase OS=Homo sapiens OX=9606 GN=GPI PE=1 SV=4	1	1	1	1	63.1	GPI
Medium	Master Protein	Q14160	Protein scribble homolog OS=Homo sapiens OX=9606 GN=SCRIB PE=1 SV=5	1	1	1	1	174.8	SCRIB
High	Master Protein	Q9ULW3	Activator of basal transcription 1 OS=Homo sapiens OX=9606 GN=ABT1 PE=1 SV=1	3	1	1	1	31.1	ABT1
High	Master Protein	P49755	Transmembrane emp24 domain-containing protein 10 OS=Homo sapiens OX=9606 GN=TMED10 PE=1 SV=2	4	1	1	1	25	TMED10
High	Master Protein	Q9Y266	Nuclear migration protein nudC OS=Homo sapiens OX=9606 GN=NUDC PE=1 SV=1	3	1	1	1	38.2	NUDC
High	Master Protein	P61009	Signal peptidase complex subunit 3 OS=Homo sapiens OX=9606 GN=SPCS3 PE=1 SV=1	5	1	1	1	20.3	SPCS3
Medium	Master Protein	O14524	Nuclear envelope integral membrane protein 1 OS=Homo sapiens OX=9606 GN=NEMP1 PE=1 SV=2	2	1	1	1	50.6	NEMP1
High	Master Protein	O14828	Secretory carrier-associated membrane protein 3 OS=Homo sapiens OX=9606 GN=SCAMP3 PE=1 SV=3	5	1	1	1	38.3	SCAMP3
High	Master Protein	Q99956	Dual specificity protein phosphatase 9 OS=Homo sapiens OX=9606 GN=DUSP9 PE=1 SV=1	4	1	1	1	41.8	DUSP9
Medium	Master Protein	O00750	Phosphatidylinositol 4-phosphate 3-kinase C2 domain-containing subunit beta OS=Homo sapiens OX=9606 GN=PIK3C2B PE=1 SV=2	0	1	1	1	184.7	PIK3C2B
High	Master Protein	P00533	Epidermal growth factor receptor OS=Homo sapiens OX=9606 GN=EGFR PE=1 SV=2	1	1	1	1	134.2	EGFR
Medium	Master Protein	Q9UQR1	Zinc finger protein 148 OS=Homo sapiens OX=9606 GN=ZNF148 PE=1 SV=2	1	1	1	1	88.9	ZNF148
High	Master Protein	Q9Y3D8	Adenylate kinase isoenzyme 6 OS=Homo sapiens OX=9606 GN=AK6 PE=1 SV=1	5	1	1	1	20	AK6
Medium	Master Protein	P02671	Fibrinogen alpha chain OS=Homo sapiens OX=9606 GN=FGA PE=1 SV=2	1	1	1	1	94.9	FGA
Medium	Master Protein	Q6ZVF9	G protein-regulated inducer of neurite outgrowth 3 OS=Homo sapiens OX=9606 GN=GPRIN3 PE=2 SV=2	1	1	1	1	82.4	GPRIN3
High	Master Protein	Q96P47	Arf-GAP with GTPase, ANK repeat and PH domain-containing protein 3 OS=Homo sapiens OX=9606 GN=AGAP3 PE=1 SV=2	2	1	1	1	95	AGAP3
Medium	Master Protein	O00459	Phosphatidylinositol 3-kinase regulatory subunit beta OS=Homo sapiens OX=9606 GN=PIK3R2 PE=1 SV=2	2	1	1	1	81.5	PIK3R2
High	Master Protein	Q9H9Y2	Ribosome production factor 1 OS=Homo sapiens OX=9606 GN=RPF1 PE=1 SV=2	3	1	1	1	40.1	RPF1
Medium	Master Protein	P17655	Calpain-2 catalytic subunit OS=Homo sapiens OX=9606 GN=CAPN2 PE=1 SV=6	1	1	1	1	79.9	CAPN2
Medium	Master Protein	P05120	Plasminogen activator inhibitor 2 OS=Homo sapiens OX=9606 GN=SERPINB2 PE=1 SV=2	2	1	1	1	46.6	SERPINB2
High	Master Protein	O15067	Phosphoribosylformylglycinamidine synthase OS=Homo sapiens OX=9606 GN=PFAS PE=1 SV=4	1	1	1	1	144.6	PFAS
High	Master Protein	Q10570	Cleavage and polyadenylation specificity factor subunit 1 OS=Homo sapiens OX=9606 GN=CPSF1 PE=1 SV=2	1	1	1	1	160.8	CPSF1
Medium	Master Protein	Q13045	Protein flightless-1 homolog OS=Homo sapiens OX=9606 GN=FLII PE=1 SV=2	1	1	1	1	144.7	FLII
Medium	Master Protein	Q14573	Inositol 1,4,5-trisphosphate receptor type 3 OS=Homo sapiens OX=9606 GN=ITPR3 PE=1 SV=2	1	1	1	1	303.9	ITPR3
Medium	Master Protein	O14964	Hepatocyte growth factor-regulated tyrosine kinase substrate OS=Homo sapiens OX=9606 GN=HGS PE=1 SV=1	1	1	1	1	86.1	HGS
High	Master Protein	Q53RT3	Retroviral-like aspartic protease 1 OS=Homo sapiens OX=9606 GN=ASPRV1 PE=1 SV=1	4	1	1	1	37	ASPRV1
Medium	Master Protein	Q13123	Protein Red OS=Homo sapiens OX=9606 GN=IK PE=1 SV=3	1	1	1	1	65.6	IK
Medium	Master Protein	Q16563	Synaptophysin-like protein 1 OS=Homo sapiens OX=9606 GN=SYPL1 PE=1 SV=1	4	1	1	1	28.5	SYPL1
High	Master Protein	Q9NPI6	mRNA-decapping enzyme 1A OS=Homo sapiens OX=9606 GN=DCP1A PE=1 SV=3	2	1	1	1	63.2	DCP1A
High	Master Protein	Q6P1K2	Polyamine-modulated factor 1 OS=Homo sapiens OX=9606 GN=PMF1 PE=1 SV=2	4	1	1	1	23.3	PMF1
High	Master Protein	Q5T6V5	Queuosine 5'-phosphate N-glycosylase/hydrolase OS=Homo sapiens OX=9606 GN=QNG1 PE=1 SV=1	2	1	1	1	39	QNG1
Medium	Master Protein	O60830	Mitochondrial import inner membrane translocase subunit Tim17-B OS=Homo sapiens OX=9606 GN=TIMM17B PE=1 SV=1	4	1	1	1	18.3	TIMM17B
Medium	Master Protein	Q16851	UTP--glucose-1-phosphate uridylyltransferase OS=Homo sapiens OX=9606 GN=UGP2 PE=1 SV=5	2	1	1	1	56.9	UGP2
High	Master Protein	Q96EE3	Nucleoporin SEH1 OS=Homo sapiens OX=9606 GN=SEH1L PE=1 SV=3	3	1	1	1	39.6	SEH1L
Medium	Master Protein	Q9UIG0	Tyrosine-protein kinase BAZ1B OS=Homo sapiens OX=9606 GN=BAZ1B PE=1 SV=2	1	1	1	1	170.8	BAZ1B
Medium	Master Protein	Q8IZ69	tRNA (uracil-5-)-methyltransferase homolog A OS=Homo sapiens OX=9606 GN=TRMT2A PE=1 SV=2	1	1	1	1	68.7	TRMT2A
High	Master Protein	P51784	Ubiquitin carboxyl-terminal hydrolase 11 OS=Homo sapiens OX=9606 GN=USP11 PE=1 SV=3	1	1	1	1	109.7	USP11
High	Master Protein	Q13085	Acetyl-CoA carboxylase 1 OS=Homo sapiens OX=9606 GN=ACACA PE=1 SV=2	1	1	1	1	265.4	ACACA
High	Master Protein	Q14657	EKC/KEOPS complex subunit LAGE3 OS=Homo sapiens OX=9606 GN=LAGE3 PE=1 SV=2	16	1	1	1	14.8	LAGE3
High	Master Protein	Q9Y4R8	Telomere length regulation protein TEL2 homolog OS=Homo sapiens OX=9606 GN=TELO2 PE=1 SV=2	1	1	1	1	91.7	TELO2
Medium	Master Protein	Q8IWS0	PHD finger protein 6 OS=Homo sapiens OX=9606 GN=PHF6 PE=1 SV=1	2	1	1	1	41.3	PHF6
Medium	Master Protein	Q6PJT7	Zinc finger CCCH domain-containing protein 14 OS=Homo sapiens OX=9606 GN=ZC3H14 PE=1 SV=1	1	1	1	1	82.8	ZC3H14
High	Master Protein	P48163	NADP-dependent malic enzyme OS=Homo sapiens OX=9606 GN=ME1 PE=1 SV=1	2	1	1	1	64.1	ME1
Medium	Master Protein	C9J2P7	Ubiquitin carboxyl-terminal hydrolase 17-like protein 15 OS=Homo sapiens OX=9606 GN=USP17L15 PE=3 SV=2	1	1	1	1	62.5	USP17L15
High	Master Protein	Q9BYG3	MKI67 FHA domain-interacting nucleolar phosphoprotein OS=Homo sapiens OX=9606 GN=NIFK PE=1 SV=1	5	1	1	1	34.2	NIFK
Medium	Master Protein	Q13409	Cytoplasmic dynein 1 intermediate chain 2 OS=Homo sapiens OX=9606 GN=DYNC1I2 PE=1 SV=3	2	1	1	1	71.4	DYNC1I2
High	Master Protein	Q13188	Serine/threonine-protein kinase 3 OS=Homo sapiens OX=9606 GN=STK3 PE=1 SV=2	2	1	1	1	56.3	STK3
High	Master Protein	Q13685	Angio-associated migratory cell protein OS=Homo sapiens OX=9606 GN=AAMP PE=1 SV=2	3	1	1	1	46.7	AAMP
Medium	Master Protein	P35637	RNA-binding protein FUS OS=Homo sapiens OX=9606 GN=FUS PE=1 SV=1	5	1	1	1	53.4	FUS
Medium	Master Protein	Q9UPY3	Endoribonuclease Dicer OS=Homo sapiens OX=9606 GN=DICER1 PE=1 SV=3	0	1	1	1	218.5	DICER1
High	Master Protein	Q15843	NEDD8 OS=Homo sapiens OX=9606 GN=NEDD8 PE=1 SV=1	17	1	1	1	9.1	NEDD8
Medium	Master Protein	O43869	Olfactory receptor 2T1 OS=Homo sapiens OX=9606 GN=OR2T1 PE=3 SV=3	2	1	1	1	42	OR2T1
Medium	Master Protein	O95409	Zinc finger protein ZIC 2 OS=Homo sapiens OX=9606 GN=ZIC2 PE=1 SV=2	2	1	1	1	55	ZIC2
Medium	Master Protein	Q15185	Prostaglandin E synthase 3 OS=Homo sapiens OX=9606 GN=PTGES3 PE=1 SV=1	6	1	1	1	18.7	PTGES3
Medium	Master Protein	O94830	Phospholipase DDHD2 OS=Homo sapiens OX=9606 GN=DDHD2 PE=1 SV=2	1	1	1	1	81	DDHD2
High	Master Protein	Q13724	Mannosyl-oligosaccharide glucosidase OS=Homo sapiens OX=9606 GN=MOGS PE=1 SV=5	1	1	1	1	91.9	MOGS
Medium	Master Protein	Q9HBE1	POZ-, AT hook-, and zinc finger-containing protein 1 OS=Homo sapiens OX=9606 GN=PATZ1 PE=1 SV=1	1	1	1	1	74	PATZ1
High	Master Protein	Q9NUD5	Zinc finger CCHC domain-containing protein 3 OS=Homo sapiens OX=9606 GN=ZCCHC3 PE=1 SV=2	4	1	1	1	43.5	ZCCHC3
High	Master Protein	Q8N4Q1	Mitochondrial intermembrane space import and assembly protein 40 OS=Homo sapiens OX=9606 GN=CHCHD4 PE=1 SV=1	17	1	1	1	16	CHCHD4
High	Master Protein	P42696	RNA-binding protein 34 OS=Homo sapiens OX=9606 GN=RBM34 PE=1 SV=2	2	1	1	1	48.5	RBM34
Medium	Master Protein	Q9BT78	COP9 signalosome complex subunit 4 OS=Homo sapiens OX=9606 GN=COPS4 PE=1 SV=1	2	1	1	1	46.2	COPS4
High	Master Protein	Q8TEM1	Nuclear pore membrane glycoprotein 210 OS=Homo sapiens OX=9606 GN=NUP210 PE=1 SV=3	1	1	1	1	205	NUP210
High	Master Protein	Q9NYJ8	TGF-beta-activated kinase 1 and MAP3K7-binding protein 2 OS=Homo sapiens OX=9606 GN=TAB2 PE=1 SV=1	2	1	1	1	76.4	TAB2
High	Master Protein	Q9BPX6	Calcium uptake protein 1, mitochondrial OS=Homo sapiens OX=9606 GN=MICU1 PE=1 SV=1	2	1	1	1	54.3	MICU1
High	Master Protein	Q6P4A8	Phospholipase B-like 1 OS=Homo sapiens OX=9606 GN=PLBD1 PE=1 SV=2	2	1	1	1	63.2	PLBD1
Medium	Master Protein	O43240	Kallikrein-10 OS=Homo sapiens OX=9606 GN=KLK10 PE=1 SV=3	5	1	1	1	30.2	KLK10
Medium	Master Protein	Q9UPQ3	Arf-GAP with GTPase, ANK repeat and PH domain-containing protein 1 OS=Homo sapiens OX=9606 GN=AGAP1 PE=1 SV=4	1	1	1	1	94.4	AGAP1
High	Master Protein	Q9NPL8	Complex I assembly factor TIMMDC1, mitochondrial OS=Homo sapiens OX=9606 GN=TIMMDC1 PE=1 SV=2	4	1	1	1	32.2	TIMMDC1
High	Master Protein	Q6YN16	Hydroxysteroid dehydrogenase-like protein 2 OS=Homo sapiens OX=9606 GN=HSDL2 PE=1 SV=1	2	1	1	1	45.4	HSDL2
Medium	Master Protein	P13693	Translationally-controlled tumor protein OS=Homo sapiens OX=9606 GN=TPT1 PE=1 SV=1	4	1	1	1	19.6	TPT1
Medium	Master Protein	Q9H814	Phosphorylated adapter RNA export protein OS=Homo sapiens OX=9606 GN=PHAX PE=1 SV=1	2	1	1	1	44.4	PHAX
High	Master Protein	O60341	Lysine-specific histone demethylase 1A OS=Homo sapiens OX=9606 GN=KDM1A PE=1 SV=2	1	1	1	1	92.8	KDM1A
High	Master Protein	Q9UG63	ATP-binding cassette sub-family F member 2 OS=Homo sapiens OX=9606 GN=ABCF2 PE=1 SV=2	2	1	1	1	71.2	ABCF2
High	Master Protein	O95817	BAG family molecular chaperone regulator 3 OS=Homo sapiens OX=9606 GN=BAG3 PE=1 SV=3	2	1	1	1	61.6	BAG3
High	Master Protein	P48651	Phosphatidylserine synthase 1 OS=Homo sapiens OX=9606 GN=PTDSS1 PE=1 SV=1	3	1	1	1	55.5	PTDSS1
High	Master Protein	P17931	Galectin-3 OS=Homo sapiens OX=9606 GN=LGALS3 PE=1 SV=5	4	1	1	1	26.1	LGALS3
High	Master Protein	Q9Y3P9	Rab GTPase-activating protein 1 OS=Homo sapiens OX=9606 GN=RABGAP1 PE=1 SV=3	1	1	1	1	121.7	RABGAP1
Medium	Master Protein	Q02218	2-oxoglutarate dehydrogenase complex component E1 OS=Homo sapiens OX=9606 GN=OGDH PE=1 SV=3	1	1	1	1	115.9	OGDH
Medium	Master Protein	Q8IZ52	Chondroitin sulfate synthase 2 OS=Homo sapiens OX=9606 GN=CHPF PE=1 SV=2	1	1	1	1	85.4	CHPF
High	Master Protein	P13804	Electron transfer flavoprotein subunit alpha, mitochondrial OS=Homo sapiens OX=9606 GN=ETFA PE=1 SV=1	5	1	1	1	35.1	ETFA
Medium	Master Protein	P02774	Vitamin D-binding protein OS=Homo sapiens OX=9606 GN=GC PE=1 SV=2	1	1	1	1	52.9	GC
High	Master Protein	Q8IXT5	RNA-binding protein 12B OS=Homo sapiens OX=9606 GN=RBM12B PE=1 SV=2	1	1	1	1	118	RBM12B
High	Master Protein	P26368	Splicing factor U2AF 65 kDa subunit OS=Homo sapiens OX=9606 GN=U2AF2 PE=1 SV=4	2	1	1	1	53.5	U2AF2
Medium	Master Protein	Q9UKX2	Myosin-2 OS=Homo sapiens OX=9606 GN=MYH2 PE=1 SV=1	0	1	1	1	222.9	MYH2
High	Master Protein	O75891	Cytosolic 10-formyltetrahydrofolate dehydrogenase OS=Homo sapiens OX=9606 GN=ALDH1L1 PE=1 SV=2	1	1	1	1	98.8	ALDH1L1
Medium	Master Protein	O95197	Reticulon-3 OS=Homo sapiens OX=9606 GN=RTN3 PE=1 SV=2	1	1	1	1	112.5	RTN3
High	Master Protein	Q96CX2	BTB/POZ domain-containing protein KCTD12 OS=Homo sapiens OX=9606 GN=KCTD12 PE=1 SV=1	4	1	1	1	35.7	KCTD12
High	Master Protein	Q9NZM5	Ribosome biogenesis protein NOP53 OS=Homo sapiens OX=9606 GN=NOP53 PE=1 SV=2	2	1	1	1	54.4	NOP53
Medium	Master Protein	Q9NX63	MICOS complex subunit MIC19 OS=Homo sapiens OX=9606 GN=CHCHD3 PE=1 SV=1	4	1	1	1	26.1	CHCHD3
Medium	Master Protein	P78362	SRSF protein kinase 2 OS=Homo sapiens OX=9606 GN=SRPK2 PE=1 SV=3	1	1	1	1	77.5	SRPK2
High	Master Protein	Q9NVX2	Notchless protein homolog 1 OS=Homo sapiens OX=9606 GN=NLE1 PE=1 SV=4	3	1	1	1	53.3	NLE1
Medium	Master Protein	P29590	Protein PML OS=Homo sapiens OX=9606 GN=PML PE=1 SV=3	1	1	1	1	97.5	PML
High	Master Protein	Q9NQS7	Inner centromere protein OS=Homo sapiens OX=9606 GN=INCENP PE=1 SV=3	1	1	1	1	105.4	INCENP
Medium	Master Protein	P48637	Glutathione synthetase OS=Homo sapiens OX=9606 GN=GSS PE=1 SV=1	2	1	1	1	52.4	GSS
Medium	Master Protein	Q6PML9	Proton-coupled zinc antiporter SLC30A9, mitochondrial OS=Homo sapiens OX=9606 GN=SLC30A9 PE=1 SV=1	2	1	1	1	63.5	SLC30A9
Medium	Master Protein	Q9GZR2	RNA exonuclease 4 OS=Homo sapiens OX=9606 GN=REXO4 PE=1 SV=2	2	1	1	1	46.6	REXO4
Medium	Master Protein	P49406	Large ribosomal subunit protein bL19m OS=Homo sapiens OX=9606 GN=MRPL19 PE=1 SV=2	4	1	1	1	33.5	MRPL19
Medium	Master Protein	O95373	Importin-7 OS=Homo sapiens OX=9606 GN=IPO7 PE=1 SV=1	1	1	1	1	119.4	IPO7
Medium	Master Protein	Q96KP1	Exocyst complex component 2 OS=Homo sapiens OX=9606 GN=EXOC2 PE=1 SV=1	1	1	1	1	104	EXOC2
High	Master Protein	P08246	Neutrophil elastase OS=Homo sapiens OX=9606 GN=ELANE PE=1 SV=1	4	1	1	1	28.5	ELANE
Medium	Master Protein	Q9Y337	Kallikrein-5 OS=Homo sapiens OX=9606 GN=KLK5 PE=1 SV=3	3	1	1	1	32	KLK5
High	Master Protein	O43795	Unconventional myosin-Ib OS=Homo sapiens OX=9606 GN=MYO1B PE=1 SV=3	1	1	1	1	131.9	MYO1B
Medium	Master Protein	P37840	Alpha-synuclein OS=Homo sapiens OX=9606 GN=SNCA PE=1 SV=1	6	1	1	1	14.5	SNCA
High	Master Protein	Q9BQG0	Myb-binding protein 1A OS=Homo sapiens OX=9606 GN=MYBBP1A PE=1 SV=2	1	1	1	1	148.8	MYBBP1A
High	Master Protein	P42166	Lamina-associated polypeptide 2, isoform alpha OS=Homo sapiens OX=9606 GN=TMPO PE=1 SV=2	2	1	1	1	75.4	TMPO
High	Master Protein	O75880	Protein SCO1 homolog, mitochondrial OS=Homo sapiens OX=9606 GN=SCO1 PE=1 SV=1	5	1	1	1	33.8	SCO1
High	Master Protein	Q49A26	Cytokine-like nuclear factor N-PAC OS=Homo sapiens OX=9606 GN=GLYR1 PE=1 SV=4	3	1	1	1	60.5	GLYR1
Medium	Master Protein	Q86U42	Polyadenylate-binding protein 2 OS=Homo sapiens OX=9606 GN=PABPN1 PE=1 SV=3	4	1	1	1	32.7	PABPN1
High	Master Protein	Q9P2R7	Succinate--CoA ligase [ADP-forming] subunit beta, mitochondrial OS=Homo sapiens OX=9606 GN=SUCLA2 PE=1 SV=3	2	1	1	1	50.3	SUCLA2
Medium	Master Protein	Q13895	Bystin OS=Homo sapiens OX=9606 GN=BYSL PE=1 SV=3	2	1	1	1	49.6	BYSL
Medium	Master Protein	Q8NFH3	Nucleoporin Nup43 OS=Homo sapiens OX=9606 GN=NUP43 PE=1 SV=1	3	1	1	1	42.1	NUP43
Medium	Master Protein	Q9P0U3	Sentrin-specific protease 1 OS=Homo sapiens OX=9606 GN=SENP1 PE=1 SV=2	2	1	1	1	73.4	SENP1
High	Master Protein	Q9UI30	Multifunctional methyltransferase subunit TRM112-like protein OS=Homo sapiens OX=9606 GN=TRMT112 PE=1 SV=1	11	1	1	1	14.2	TRMT112
Medium	Master Protein	Q5JRX3	Presequence protease, mitochondrial OS=Homo sapiens OX=9606 GN=PITRM1 PE=1 SV=3	1	1	1	1	117.3	PITRM1
Medium	Master Protein	P23284	Peptidyl-prolyl cis-trans isomerase B OS=Homo sapiens OX=9606 GN=PPIB PE=1 SV=2	4	1	1	1	23.7	PPIB
High	Master Protein	Q8IWZ6	Bardet-Biedl syndrome 7 protein OS=Homo sapiens OX=9606 GN=BBS7 PE=1 SV=2	2	1	1	1	80.3	BBS7
Medium	Master Protein	Q6ZRI6	Uncharacterized protein C15orf39 OS=Homo sapiens OX=9606 GN=C15orf39 PE=1 SV=3	1	1	1	1	110.6	C15orf39
High	Master Protein	Q9UBB6	Neurochondrin OS=Homo sapiens OX=9606 GN=NCDN PE=1 SV=1	2	1	1	1	78.8	NCDN
High	Master Protein	Q9BYB4	Guanine nucleotide-binding protein subunit beta-like protein 1 OS=Homo sapiens OX=9606 GN=GNB1L PE=1 SV=2	2	1	1	1	35.6	GNB1L
High	Master Protein	Q8IVW6	AT-rich interactive domain-containing protein 3B OS=Homo sapiens OX=9606 GN=ARID3B PE=1 SV=2	2	1	1	1	60.6	ARID3B
High	Master Protein	Q16630	Cleavage and polyadenylation specificity factor subunit 6 OS=Homo sapiens OX=9606 GN=CPSF6 PE=1 SV=2	2	1	1	1	59.2	CPSF6
High	Master Protein	A0A0C4DH25	Immunoglobulin kappa variable 3D-20 OS=Homo sapiens OX=9606 GN=IGKV3D-20 PE=3 SV=1	14	1	1	1	12.5	IGKV3D-20
High	Master Protein	Q01780	Exosome complex component 10 OS=Homo sapiens OX=9606 GN=EXOSC10 PE=1 SV=2	1	1	1	1	100.8	EXOSC10
High	Master Protein	P63167	Dynein light chain 1, cytoplasmic OS=Homo sapiens OX=9606 GN=DYNLL1 PE=1 SV=1	12	1	1	1	10.4	DYNLL1
Medium	Master Protein	Q7Z4W1	L-xylulose reductase OS=Homo sapiens OX=9606 GN=DCXR PE=1 SV=2	3	1	1	1	25.9	DCXR
High	Master Protein	P31350	Ribonucleoside-diphosphate reductase subunit M2 OS=Homo sapiens OX=9606 GN=RRM2 PE=1 SV=1	2	1	1	1	44.8	RRM2
Medium	Master Protein	O95801	Tetratricopeptide repeat protein 4 OS=Homo sapiens OX=9606 GN=TTC4 PE=1 SV=3	3	1	1	1	44.7	TTC4
High	Master Protein	Q14126	Desmoglein-2 OS=Homo sapiens OX=9606 GN=DSG2 PE=1 SV=2	1	1	1	1	122.2	DSG2
Medium	Master Protein	Q9Y3D9	Small ribosomal subunit protein mS23 OS=Homo sapiens OX=9606 GN=MRPS23 PE=1 SV=2	5	1	1	1	21.8	MRPS23
High	Master Protein	Q9NVS9	Pyridoxine-5'-phosphate oxidase OS=Homo sapiens OX=9606 GN=PNPO PE=1 SV=1	6	1	1	1	30	PNPO
High	Master Protein	Q9H992	E3 ubiquitin-protein ligase MARCHF7 OS=Homo sapiens OX=9606 GN=MARCHF7 PE=1 SV=1	2	1	1	1	78	MARCHF7
High	Master Protein	P55196	Afadin OS=Homo sapiens OX=9606 GN=AFDN PE=1 SV=3	0	1	1	1	206.7	AFDN
Medium	Master Protein	P36969	Phospholipid hydroperoxide glutathione peroxidase OS=Homo sapiens OX=9606 GN=GPX4 PE=1 SV=3	4	1	1	1	22.2	GPX4
High	Master Protein	Q9Y3I1	F-box only protein 7 OS=Homo sapiens OX=9606 GN=FBXO7 PE=1 SV=1	2	1	1	1	58.5	FBXO7
High	Master Protein	P08579	U2 small nuclear ribonucleoprotein B'' OS=Homo sapiens OX=9606 GN=SNRPB2 PE=1 SV=1	4	1	1	1	25.5	SNRPB2
High	Master Protein	P27797	Calreticulin OS=Homo sapiens OX=9606 GN=CALR PE=1 SV=1	3	1	1	1	48.1	CALR
High	Master Protein	Q9NXF1	Testis-expressed protein 10 OS=Homo sapiens OX=9606 GN=TEX10 PE=1 SV=2	1	1	1	1	105.6	TEX10
High	Master Protein	Q06203	Amidophosphoribosyltransferase OS=Homo sapiens OX=9606 GN=PPAT PE=1 SV=1	2	1	1	1	57.4	PPAT
Medium	Master Protein	Q9NZN8	CCR4-NOT transcription complex subunit 2 OS=Homo sapiens OX=9606 GN=CNOT2 PE=1 SV=1	3	1	1	1	59.7	CNOT2
Medium	Master Protein	Q17RS7	Flap endonuclease GEN homolog 1 OS=Homo sapiens OX=9606 GN=GEN1 PE=1 SV=2	1	1	1	1	102.8	GEN1
Medium	Master Protein	Q8NBF2	NHL repeat-containing protein 2 OS=Homo sapiens OX=9606 GN=NHLRC2 PE=1 SV=1	1	1	1	1	79.4	NHLRC2
Medium	Master Protein	P30084	Enoyl-CoA hydratase, mitochondrial OS=Homo sapiens OX=9606 GN=ECHS1 PE=1 SV=4	4	1	1	1	31.4	ECHS1
Medium	Master Protein	P17028	Zinc finger protein 24 OS=Homo sapiens OX=9606 GN=ZNF24 PE=1 SV=4	2	1	1	1	42.1	ZNF24
High	Master Protein	Q15291	Retinoblastoma-binding protein 5 OS=Homo sapiens OX=9606 GN=RBBP5 PE=1 SV=2	2	1	1	1	59.1	RBBP5
High	Master Protein	P04264	Keratin, type II cytoskeletal 1 OS=Homo sapiens OX=9606 GN=KRT1 PE=1 SV=6	60	74	2154	65	66	KRT1	2.02737e+09	9.76787e+08	2.83033e+09	1.47048e+09	1.95725e+09	5.97608e+09
High	Master Protein	P13645	Keratin, type I cytoskeletal 10 OS=Homo sapiens OX=9606 GN=KRT10 PE=1 SV=6	70	56	1652	44	58.8	KRT10	1.10466e+09	6.40684e+08	1.42116e+09	1.04788e+09	1.79527e+09	4.84178e+09
High	Master Protein	P35908	Keratin, type II cytoskeletal 2 epidermal OS=Homo sapiens OX=9606 GN=KRT2 PE=1 SV=2	88	72	1452	50	65.4	KRT2	4.88895e+08	2.74241e+08	5.82449e+08	3.2755e+08	7.99016e+08	2.63435e+09
High	Master Protein	P35527	Keratin, type I cytoskeletal 9 OS=Homo sapiens OX=9606 GN=KRT9 PE=1 SV=3	64	52	1395	51	62	KRT9	1.00095e+09	4.10736e+08	1.06126e+09	5.11072e+08	6.40393e+08	1.85196e+09
High	Master Protein	P13647	Keratin, type II cytoskeletal 5 OS=Homo sapiens OX=9606 GN=KRT5 PE=1 SV=3	65	59	818	33	62.3	KRT5	1.22329e+08	5.12602e+07	1.24553e+08	9.75087e+07	1.35575e+08	2.65652e+08
High	Master Protein	P04259	Keratin, type II cytoskeletal 6B OS=Homo sapiens OX=9606 GN=KRT6B PE=1 SV=5	66	52	742	5	60	KRT6B	4.36635e+06	860302	1.61692e+06	3.04932e+06	3.54661e+06	5.20723e+06
High	Master Protein	P02538	Keratin, type II cytoskeletal 6A OS=Homo sapiens OX=9606 GN=KRT6A PE=1 SV=3	66	55	730	5	60	KRT6A	5.24427e+07	1.32838e+07	2.68129e+07	4.23444e+07	2.50429e+07	5.82295e+07
High	Master Protein	P02533	Keratin, type I cytoskeletal 14 OS=Homo sapiens OX=9606 GN=KRT14 PE=1 SV=4	77	44	679	15	51.5	KRT14	1.37292e+08	5.2195e+07	1.22425e+08	1.03145e+08	1.25189e+08	1.95706e+08
High	Master Protein	P08779	Keratin, type I cytoskeletal 16 OS=Homo sapiens OX=9606 GN=KRT16 PE=1 SV=4	68	39	523	20	51.2	KRT16	2.84812e+07	6.28332e+06	1.1716e+07	1.64301e+07	1.8591e+07	2.30435e+07
High	Master Protein	P05787	Keratin, type II cytoskeletal 8 OS=Homo sapiens OX=9606 GN=KRT8 PE=1 SV=7	50	31	396	16	53.7	KRT8	1.86779e+07	1.45718e+07	1.83863e+07	4.49111e+06	5.2092e+06	5.57187e+06
High	Master Protein	Q04695	Keratin, type I cytoskeletal 17 OS=Homo sapiens OX=9606 GN=KRT17 PE=1 SV=2	66	36	382	15	48.1	KRT17	1.18082e+07	2.40657e+06	4.94193e+06	5.49995e+06	6.46166e+06	1.19272e+07
High	Master Protein	P12035	Keratin, type II cytoskeletal 3 OS=Homo sapiens OX=9606 GN=KRT3 PE=1 SV=3	25	24	344	5	64.4	KRT3	641161	1.71636e+06	2.96772e+06	4.60885e+07	5.06798e+07	6.94097e+06
High	Master Protein	Q01546	Keratin, type II cytoskeletal 2 oral OS=Homo sapiens OX=9606 GN=KRT76 PE=1 SV=2	14	19	342	1	65.8	KRT76				767538	1234239	389735
High	Master Protein	O95678	Keratin, type II cytoskeletal 75 OS=Homo sapiens OX=9606 GN=KRT75 PE=1 SV=2	25	22	324	1	59.5	KRT75
High	Master Protein	Q5XKE5	Keratin, type II cytoskeletal 79 OS=Homo sapiens OX=9606 GN=KRT79 PE=1 SV=2	16	14	285	1	57.8	KRT79		27583.5		259585	455139
High	Master Protein	P13646	Keratin, type I cytoskeletal 13 OS=Homo sapiens OX=9606 GN=KRT13 PE=1 SV=4	50	27	254	15	49.6	KRT13	7.33686e+06	2.69859e+06	2.67322e+07	3.68266e+07	4.77466e+07	1.2721e+07
High	Master Protein	P08729	Keratin, type II cytoskeletal 7 OS=Homo sapiens OX=9606 GN=KRT7 PE=1 SV=5	15	11	238	2	51.4	KRT7	53117		48265.9	22621.7	70480.6	59200.3
High	Master Protein	P19013	Keratin, type II cytoskeletal 4 OS=Homo sapiens OX=9606 GN=KRT4 PE=1 SV=5	26	15	233	8	56.1	KRT4	834947	314109	4.94897e+06	668549	294572	1.30114e+06
High	Master Protein	P08727	Keratin, type I cytoskeletal 19 OS=Homo sapiens OX=9606 GN=KRT19 PE=1 SV=4	27	14	192	1	44.1	KRT19
High	Master Protein	Q6KB66	Keratin, type II cytoskeletal 80 OS=Homo sapiens OX=9606 GN=KRT80 PE=1 SV=2	24	11	187	10	50.5	KRT80	734590	288510	902935	923943	1.32365e+06	4.30431e+06
High	Master Protein	Q7Z3Y7	Keratin, type I cytoskeletal 28 OS=Homo sapiens OX=9606 GN=KRT28 PE=1 SV=2	18	12	176	2	50.5	KRT28
High	Master Protein	Q7Z794	Keratin, type II cytoskeletal 1b OS=Homo sapiens OX=9606 GN=KRT77 PE=1 SV=3	25	16	129	11	61.9	KRT77	1.08284e+06	944021	1.37909e+06	1.46153e+06	1.06447e+06	9.77295e+06
High	Master Protein	Q3SY84	Keratin, type II cytoskeletal 71 OS=Homo sapiens OX=9606 GN=KRT71 PE=1 SV=3	32	19	118	10	57.3	KRT71	5.07096e+06	3.07835e+06	1.38105e+07	4.98416e+06	1.18111e+07	2.79697e+07
High	Master Protein	Q7Z3Y8	Keratin, type I cytoskeletal 27 OS=Homo sapiens OX=9606 GN=KRT27 PE=1 SV=2	26	13	112	6	49.8	KRT27		674236	3.3923e+06	1.14526e+06	4.07486e+06	371879
High	Master Protein	Q14CN4	Keratin, type II cytoskeletal 72 OS=Homo sapiens OX=9606 GN=KRT72 PE=1 SV=2	15	10	104	1	55.8	KRT72		114410	533493	274353	788611	243240
High	Master Protein	Q8N1N4	Keratin, type II cytoskeletal 78 OS=Homo sapiens OX=9606 GN=KRT78 PE=1 SV=2	34	19	85	16	56.8	KRT78	2.44753e+06	1.21897e+06	3.64087e+06	1.78512e+06	3.02125e+06	1.34627e+07
High	Master Protein	P05783	Keratin, type I cytoskeletal 18 OS=Homo sapiens OX=9606 GN=KRT18 PE=1 SV=2	46	18	77	16	48	KRT18	1.50873e+07	1.26119e+07	1.60747e+07	3.68171e+06	4.25286e+06	3.55414e+06
High	Master Protein	Q9NSB2	Keratin, type II cuticular Hb4 OS=Homo sapiens OX=9606 GN=KRT84 PE=2 SV=2	9	8	65	1	64.8	KRT84					82355.7
High	Master Protein	Q15323	Keratin, type I cuticular Ha1 OS=Homo sapiens OX=9606 GN=KRT31 PE=1 SV=3	23	9	57	3	47.2	KRT31	81246.4	78647.7	8.26684e+06	1.18549e+06	2.0637e+06	127736
High	Master Protein	O76013	Keratin, type I cuticular Ha6 OS=Homo sapiens OX=9606 GN=KRT36 PE=1 SV=1	5	3	39	1	52.2	KRT36					284241
High	Master Protein	Q5T749	Keratinocyte proline-rich protein OS=Homo sapiens OX=9606 GN=KPRP PE=1 SV=1	10	7	33	7	64.1	KPRP	2.46481e+06	2.15421e+06	5.62519e+06	1.89134e+06	2.81642e+06	1.52536e+07
High	Master Protein	P78386	Keratin, type II cuticular Hb5 OS=Homo sapiens OX=9606 GN=KRT85 PE=1 SV=1	26	15	25	2	55.8	KRT85	162087	51926.3	417957
High	Master Protein	O43790	Keratin, type II cuticular Hb6 OS=Homo sapiens OX=9606 GN=KRT86 PE=1 SV=1	26	15	25	2	53.5	KRT86	137662	84209.2	1.18114e+07	622561	2.99717e+06
High	Master Protein	Q9C075	Keratin, type I cytoskeletal 23 OS=Homo sapiens OX=9606 GN=KRT23 PE=1 SV=2	7	3	25	1	48.1	KRT23					150372	349985
High	Master Protein	O76009	Keratin, type I cuticular Ha3-I OS=Homo sapiens OX=9606 GN=KRT33A PE=2 SV=2	19	7	17	1	45.9	KRT33A
High	Master Protein	O76011	Keratin, type I cuticular Ha4 OS=Homo sapiens OX=9606 GN=KRT34 PE=1 SV=3	20	6	15	2	44.7	KRT34			661607
High	Master Protein	Q9NSB4	Keratin, type II cuticular Hb2 OS=Homo sapiens OX=9606 GN=KRT82 PE=1 SV=3	6	3	3	1	56.6	KRT82					354710

## Sheet: CBU0937_GAPDH norm_log2FC
Molecule.Name	Description	Coverage	Peptides	PSMs	Unique.Peptides	MW.in.kDa	Gene.Symbol	Fold.Change	P.Value	BH_adjusted_pvalue
A0A0C4DH25		NA	-1.83494	0.0871518	TRUE	NA		NA	NA	NA
A0A8I5KQE6		NA	1.33861	0.390748	TRUE	NA		NA	NA	NA
O00422		NA	-0.656453	0.602361	TRUE	NA		NA	NA	NA
O00499		NA	0.344925	0.833716	TRUE	NA		NA	NA	NA
O14639		NA	-1.09505	0.328404	TRUE	NA		NA	NA	NA
O14818		NA	-1.0294	0.362111	TRUE	NA		NA	NA	NA
O15021		NA	-1.46157	0.121364	TRUE	NA		NA	NA	NA
O43707		NA	-1.04202	0.394263	TRUE	NA		NA	NA	NA
O60496		NA	-1.83986	0.0967853	TRUE	NA		NA	NA	NA
O60716		NA	-1.03899	0.456524	TRUE	NA		NA	NA	NA
O60907		NA	-1.01223	0.265563	TRUE	NA		NA	NA	NA
O75376		NA	-2.4239	0.129246	TRUE	NA		NA	NA	NA
O94906		NA	-0.334608	0.593634	TRUE	NA		NA	NA	NA
O95395		NA	-3.03846	0.00971497	TRUE	NA		NA	NA	NA
O95455		NA	-2.07873	0.0969725	TRUE	NA		NA	NA	NA
P01861		NA	-1.2364	0.425909	TRUE	NA		NA	NA	NA
P02042		NA	3.9248	0.412765	TRUE	NA		NA	NA	NA
P02585		NA	-3.25515	0.0416735	TRUE	NA		NA	NA	NA
P05413		NA	-0.453329	0.697964	TRUE	NA		NA	NA	NA
P08912		NA	-0.985009	0.621618	TRUE	NA		NA	NA	NA
P0C0S8		NA	-1.94768	0.121962	TRUE	NA		NA	NA	NA
P0DOX7		NA	-1.24394	0.354217	TRUE	NA		NA	NA	NA
P11137		NA	-1.24112	0.282294	TRUE	NA		NA	NA	NA
P11279		NA	-0.300919	0.863479	TRUE	NA		NA	NA	NA
P11712		NA	-1.05821	0.419116	TRUE	NA		NA	NA	NA
P16989		NA	-1.41961	0.213393	TRUE	NA		NA	NA	NA
P20061		NA	-0.79616	0.281466	TRUE	NA		NA	NA	NA
P20671		NA	-1.03102	0.733318	TRUE	NA		NA	NA	NA
P20742		NA	1.5775	0.403153	TRUE	NA		NA	NA	NA
P21108		NA	-0.472508	0.739598	TRUE	NA		NA	NA	NA
P25325		NA	-0.0350516	0.973883	TRUE	NA		NA	NA	NA
P25685		NA	-0.53609	0.723971	TRUE	NA		NA	NA	NA
P27824		NA	-1.53428	0.290763	TRUE	NA		NA	NA	NA
P28370		NA	-2.10201	0.0823919	TRUE	NA		NA	NA	NA
P31150		NA	-1.21352	0.223008	TRUE	NA		NA	NA	NA
P35250		NA	-1.23476	0.153744	TRUE	NA		NA	NA	NA
P35998		NA	-2.69032	0.309477	TRUE	NA		NA	NA	NA
P40394		NA	-0.81423	0.105438	TRUE	NA		NA	NA	NA
P42025		NA	-0.955904	0.014393	TRUE	NA		NA	NA	NA
P48594		NA	0.217394	0.785554	TRUE	NA		NA	NA	NA
P51116		NA	-1.45341	0.258331	TRUE	NA		NA	NA	NA
P53367		NA	-0.18467	0.841213	TRUE	NA		NA	NA	NA
P54725		NA	-1.4442	0.0825625	TRUE	NA		NA	NA	NA
P56545		NA	-1.04009	0.19857	TRUE	NA		NA	NA	NA
P59190		NA	-1.47345	0.372755	TRUE	NA		NA	NA	NA
P60468		NA	-0.96507	0.52025	TRUE	NA		NA	NA	NA
P68363		NA	5.2123	0.155656	TRUE	NA		NA	NA	NA
P78344		NA	-0.415188	0.737557	TRUE	NA		NA	NA	NA
P78559		NA	-0.922809	0.341928	TRUE	NA		NA	NA	NA
P83916		NA	-1.99623	0.0966422	TRUE	NA		NA	NA	NA
Q06203		NA	-1.78532	0.177298	TRUE	NA		NA	NA	NA
Q06828		NA	1.47477	0.557934	TRUE	NA		NA	NA	NA
Q08170		NA	-2.07713	0.246523	TRUE	NA		NA	NA	NA
Q08345		NA	-2.07529	0.0460905	TRUE	NA		NA	NA	NA
Q09028		NA	0.400749	0.755704	TRUE	NA		NA	NA	NA
Q13509		NA	-1.81575	0.146999	TRUE	NA		NA	NA	NA
Q13554		NA	-0.861265	0.300936	TRUE	NA		NA	NA	NA
Q13625		NA	-2.87322	0.319884	TRUE	NA		NA	NA	NA
Q13838		NA	-1.09114	0.324173	TRUE	NA		NA	NA	NA
Q14692		NA	0.348396	0.791543	TRUE	NA		NA	NA	NA
Q15003		NA	0.0262703	0.984129	TRUE	NA		NA	NA	NA
Q32NC0		NA	-1.39561	0.274747	TRUE	NA		NA	NA	NA
Q3SXM5		NA	-1.44868	0.308396	TRUE	NA		NA	NA	NA
Q5QP82		NA	-2.36423	0.0230251	TRUE	NA		NA	NA	NA
Q5T0U0		NA	0.389711	0.817495	TRUE	NA		NA	NA	NA
Q5T750		NA	-0.72309	0.676117	TRUE	NA		NA	NA	NA
Q5T7B8		NA	-1.25198	0.335956	TRUE	NA		NA	NA	NA
Q63HR2		NA	-1.06196	0.600143	TRUE	NA		NA	NA	NA
Q69YN4		NA	-0.764496	0.442002	TRUE	NA		NA	NA	NA
Q6UX71		NA	-1.46435	0.106355	TRUE	NA		NA	NA	NA
Q6VAB6		NA	-2.42745	0.0073164	TRUE	NA		NA	NA	NA
Q6WKZ4		NA	-2.62018	0.00334193	TRUE	NA		NA	NA	NA
Q6ZMW3		NA	-1.12515	0.0692796	TRUE	NA		NA	NA	NA
Q6ZP65		NA	-2.26983	0.15748	TRUE	NA		NA	NA	NA
Q6ZRV2		NA	-0.990258	0.394646	TRUE	NA		NA	NA	NA
Q7Z2Y8		NA	-2.26096	0.0744774	TRUE	NA		NA	NA	NA
Q7Z3B4		NA	-1.10611	0.100465	TRUE	NA		NA	NA	NA
Q7Z4W1		NA	-0.857472	0.255974	TRUE	NA		NA	NA	NA
Q7Z6R9		NA	-1.35547	0.243366	TRUE	NA		NA	NA	NA
Q7Z739		NA	-0.517242	0.659212	TRUE	NA		NA	NA	NA
Q86U90		NA	-1.52859	0.00534064	TRUE	NA		NA	NA	NA
Q86UK5		NA	0.16452	0.91782	TRUE	NA		NA	NA	NA
Q86V48		NA	-0.189431	0.508833	TRUE	NA		NA	NA	NA
Q86WR7		NA	-2.93392	0.191316	TRUE	NA		NA	NA	NA
Q86X67		NA	0.423236	0.697041	TRUE	NA		NA	NA	NA
Q8IUR6		NA	-0.794352	0.436261	TRUE	NA		NA	NA	NA
Q8IV33		NA	0.0354358	0.984076	TRUE	NA		NA	NA	NA
Q8IX12		NA	-1.54072	0.233251	TRUE	NA		NA	NA	NA
Q8IXJ9		NA	-0.778086	0.574691	TRUE	NA		NA	NA	NA
Q8IYD1		NA	-1.29986	0.0460001	TRUE	NA		NA	NA	NA
Q8IYG6		NA	-1.15761	0.264502	TRUE	NA		NA	NA	NA
Q8IYH5		NA	-2.65767	0.269577	TRUE	NA		NA	NA	NA
Q8N187		NA	-3.78119	0.138567	TRUE	NA		NA	NA	NA
Q8N9I5		NA	-1.39844	0.141125	TRUE	NA		NA	NA	NA
Q8TCY9		NA	-1.77771	0.0163501	TRUE	NA		NA	NA	NA
Q8TDI7		NA	-2.24058	0.156391	TRUE	NA		NA	NA	NA
Q8WUX9		NA	-2.58491	0.124599	TRUE	NA		NA	NA	NA
Q8WVP7		NA	-1.8604	0.360245	TRUE	NA		NA	NA	NA
Q8WX92		NA	1.59868	0.551142	TRUE	NA		NA	NA	NA
Q8WYP5		NA	-0.559468	0.685847	TRUE	NA		NA	NA	NA
Q92794		NA	-0.855964	0.546143	TRUE	NA		NA	NA	NA
Q93077		NA	0.3883	0.867441	TRUE	NA		NA	NA	NA
Q96EY4		NA	-1.68155	0.201997	TRUE	NA		NA	NA	NA
Q96F07		NA	-1.47336	0.166662	TRUE	NA		NA	NA	NA
Q96JN8		NA	-1.13502	0.161427	TRUE	NA		NA	NA	NA
Q96KN9		NA	-2.26428	0.0717181	TRUE	NA		NA	NA	NA
Q96QK1		NA	-1.99435	0.164835	TRUE	NA		NA	NA	NA
Q96SB3		NA	-1.50403	0.0656517	TRUE	NA		NA	NA	NA
Q99880		NA	-4.66429	0.302682	TRUE	NA		NA	NA	NA
Q9BYZ6		NA	-2.83916	0.123191	TRUE	NA		NA	NA	NA
Q9C037		NA	-1.69731	0.140795	TRUE	NA		NA	NA	NA
Q9C0C7		NA	-0.754422	0.352431	TRUE	NA		NA	NA	NA
Q9NR22		NA	-0.283232	0.778162	TRUE	NA		NA	NA	NA
Q9NU22		NA	0.903681	0.595044	TRUE	NA		NA	NA	NA
Q9NV66		NA	-2.35177	0.0680766	TRUE	NA		NA	NA	NA
Q9NVP1		NA	-1.34135	0.305812	TRUE	NA		NA	NA	NA
Q9NX02		NA	-0.331491	0.804984	TRUE	NA		NA	NA	NA
Q9NX65		NA	0.483844	0.724866	TRUE	NA		NA	NA	NA
Q9NXF1		NA	-0.494081	0.70735	TRUE	NA		NA	NA	NA
Q9NYC9		NA	1.76603	0.390671	TRUE	NA		NA	NA	NA
Q9NZM5		NA	-1.55422	0.20626	TRUE	NA		NA	NA	NA
Q9NZT1		NA	-1.96256	0.18466	TRUE	NA		NA	NA	NA
Q9P2I0		NA	-1.04184	0.359668	TRUE	NA		NA	NA	NA
Q9UBL6		NA	-1.24868	0.228972	TRUE	NA		NA	NA	NA
Q9UBY8		NA	-1.4967	0.189007	TRUE	NA		NA	NA	NA
Q9UI32		NA	-1.16892	0.276036	TRUE	NA		NA	NA	NA
Q9UKK3		NA	-2.74472	0.106106	TRUE	NA		NA	NA	NA
Q9UL36		NA	-1.45709	0.173097	TRUE	NA		NA	NA	NA
Q9UN36		NA	-2.27786	0.103225	TRUE	NA		NA	NA	NA
Q9Y238		NA	-1.94114	0.1281	TRUE	NA		NA	NA	NA
Q9Y3U8		NA	-0.269302	0.778604	TRUE	NA		NA	NA	NA
P52732	Kinesin-like protein KIF11 OS=Homo sapiens OX=9606 GN=KIF11 PE=1 SV=2	79	123	2452	123	119.1	KIF11	12.589	0.000453075	0.140023
Q9NXV2	BTB/POZ domain-containing protein KCTD5 OS=Homo sapiens OX=9606 GN=KCTD5 PE=1 SV=1	83	16	199	15	26.1	KCTD5	8.54506	0.00044977	0.140023
O75688	Protein phosphatase 1B OS=Homo sapiens OX=9606 GN=PPM1B PE=1 SV=1	51	24	237	24	52.6	PPM1B	7.08548	0.00152137	0.140023
P69905	Hemoglobin subunit alpha OS=Homo sapiens OX=9606 GN=HBA1 PE=1 SV=2	27	5	162	5	15.2	HBA1; HBA2	6.70419	0.0732274	0.346565
Q8N5Z5	BTB/POZ domain-containing protein KCTD17 OS=Homo sapiens OX=9606 GN=KCTD17 PE=1 SV=3	45	12	115	12	35.6	0	6.02907	0.00470707	0.140491
Q9NYF8	Bcl-2-associated transcription factor 1 OS=Homo sapiens OX=9606 GN=BCLAF1 PE=1 SV=2	21	19	91	19	106.1	BCLAF1	5.62129	0.00332362	0.140491
Q15208	Serine/threonine-protein kinase 38 OS=Homo sapiens OX=9606 GN=STK38 PE=1 SV=1	36	19	96	15	54.2	STK38	5.55912	0.00144556	0.140023
Q14681	BTB/POZ domain-containing protein KCTD2 OS=Homo sapiens OX=9606 GN=KCTD2 PE=1 SV=3	54	10	89	9	28.5	KCTD2	5.41524	0.00162451	0.140023
Q9Y2W1	Thyroid hormone receptor-associated protein 3 OS=Homo sapiens OX=9606 GN=THRAP3 PE=1 SV=2	23	19	93	19	108.6	THRAP3	4.77738	0.0122869	0.175259
O14744	Protein arginine N-methyltransferase 5 OS=Homo sapiens OX=9606 GN=PRMT5 PE=1 SV=4	27	18	113	18	72.6	PRMT5	4.60748	0.00352953	0.140491
Q5TEC6	Histone H3-7 OS=Homo sapiens OX=9606 GN=H3-7 PE=1 SV=1	29	6	68	1	15.4	H3-7	4.07862	0.0131069	0.179477
Q6P3W7	SCY1-like protein 2 OS=Homo sapiens OX=9606 GN=SCYL2 PE=1 SV=1	30	22	98	22	103.6	SCYL2	3.72352	0.0112298	0.175259
P68032	Actin, alpha cardiac muscle 1 OS=Homo sapiens OX=9606 GN=ACTC1 PE=1 SV=1	34	16	332	1	42	ACTC1	3.33892	0.0395811	0.265152
Q15274	Nicoti0te-nucleotide pyrophosphorylase [carboxylating] OS=Homo sapiens OX=9606 GN=QPRT PE=1 SV=3	15	4	14	4	30.8	QPRT	3.20232	0.0400022	0.265152
P84090	Enhancer of rudimentary homolog OS=Homo sapiens OX=9606 GN=ERH PE=1 SV=1	22	4	17	4	12.3	ERH	3.07269	0.0347884	0.263553
P06310	Immunoglobulin kappa variable 2-30 OS=Homo sapiens OX=9606 GN=IGKV2-30 PE=3 SV=2	26	5	811	3	13.2	IGKV2-30	3.02549	0.196384	0.500705
P63104	14-3-3 protein zeta/delta OS=Homo sapiens OX=9606 GN=YWHAZ PE=1 SV=1	45	10	72	6	27.7	YWHAZ	2.95015	0.198197	0.500766
Q16629	Serine/arginine-rich splicing factor 7 OS=Homo sapiens OX=9606 GN=SRSF7 PE=1 SV=1	28	8	62	7	27.4	SRSF7	2.91853	0.0499949	0.296028
Q9BQA1	Methylosome protein WDR77 OS=Homo sapiens OX=9606 GN=WDR77 PE=1 SV=1	25	6	25	6	36.7	WDR77	2.91762	0.0269842	0.253951
O60814	Histone H2B type 1-K OS=Homo sapiens OX=9606 GN=H2BC12 PE=1 SV=3	64	12	181	3	13.9	H2BC12	2.9066	0.276975	0.570047
P19474	E3 ubiquitin-protein ligase TRIM21 OS=Homo sapiens OX=9606 GN=TRIM21 PE=1 SV=1	52	28	243	28	54.1	TRIM21	2.90023	0.181165	0.486664
P62995	Transformer-2 protein homolog beta OS=Homo sapiens OX=9606 GN=TRA2B PE=1 SV=1	24	7	45	6	33.6	TRA2B	2.84645	0.0381663	0.265152
Q13247	Serine/arginine-rich splicing factor 6 OS=Homo sapiens OX=9606 GN=SRSF6 PE=1 SV=2	16	7	27	7	39.6	SRSF6	2.78898	0.200751	0.502856
P02545	Prelamin-A/C OS=Homo sapiens OX=9606 GN=LM0 PE=1 SV=1	20	13	41	12	74.1	LM0	2.68258	0.089635	0.37119
Q13595	Transformer-2 protein homolog alpha OS=Homo sapiens OX=9606 GN=TRA2A PE=1 SV=1	15	5	23	4	32.7	TRA2A	2.37607	0.0958722	0.386121
Q8IXB1	D0J homolog subfamily C member 10 OS=Homo sapiens OX=9606 GN=D0JC10 PE=1 SV=2	16	10	43	10	91	D0JC10	2.14601	0.0882914	0.370103
Q04760	Lactoylglutathione lyase OS=Homo sapiens OX=9606 GN=GLO1 PE=1 SV=4	22	5	13	5	20.8	GLO1	2.03276	0.0357843	0.263553
Q15084	Protein disulfide-isomerase A6 OS=Homo sapiens OX=9606 GN=PDIA6 PE=1 SV=1	23	9	51	9	48.1	PDIA6	1.87553	0.165742	0.48525
P02768	Albumin OS=Homo sapiens OX=9606 GN=ALB PE=1 SV=2	45	25	108	25	69.3	ALB	1.84947	0.0768895	0.350958
P22102	Trifunctio0l purine biosynthetic protein adenosine-3 OS=Homo sapiens OX=9606 GN=GART PE=1 SV=1	12	10	27	10	107.7	GART	1.83781	0.177306	0.486664
Q9Y657	Spindlin-1 OS=Homo sapiens OX=9606 GN=SPIN1 PE=1 SV=3	25	5	14	5	29.6	SPIN1	1.83647	0.039414	0.265152
Q13310	Polyadenylate-binding protein 4 OS=Homo sapiens OX=9606 GN=PABPC4 PE=1 SV=1	34	20	99	12	70.7	PABPC4	1.79322	0.133759	0.443689
P40429	Large ribosomal subunit protein uL13 OS=Homo sapiens OX=9606 GN=RPL13A PE=1 SV=2	26	7	34	7	23.6	RPL13A	1.77505	0.093071	0.377802
O75122	CLIP-associating protein 2 OS=Homo sapiens OX=9606 GN=CLASP2 PE=1 SV=3	1	1	6	1	141	CLASP2	1.72633	0.541979	0.73802
P38919	Eukaryotic initiation factor 4A-III OS=Homo sapiens OX=9606 GN=EIF4A3 PE=1 SV=4	27	12	47	11	46.8	EIF4A3	1.69183	0.109937	0.40468
P30101	Protein disulfide-isomerase A3 OS=Homo sapiens OX=9606 GN=PDIA3 PE=1 SV=4	20	11	27	11	56.7	PDIA3	1.64568	0.143574	0.458163
P35520	Cystathionine beta-synthase OS=Homo sapiens OX=9606 GN=CBS PE=1 SV=2	9	5	14	5	60.5	CBS	1.62595	0.154454	0.474924
Q9BVI4	Nucleolar complex protein 4 homolog OS=Homo sapiens OX=9606 GN=NOC4L PE=1 SV=1	24	8	27	8	58.4	NOC4L	1.57016	0.121872	0.42428
P00338	L-lactate dehydroge0se A chain OS=Homo sapiens OX=9606 GN=LDHA PE=1 SV=2	16	5	27	4	36.7	LDHA	1.55045	0.255809	0.559949
P55036	26S proteasome non-ATPase regulatory subunit 4 OS=Homo sapiens OX=9606 GN=PSMD4 PE=1 SV=1	46	15	122	15	40.7	PSMD4	1.52012	0.132645	0.443689
Q16678	Cytochrome P450 1B1 OS=Homo sapiens OX=9606 GN=CYP1B1 PE=1 SV=2	5	4	7	4	60.8	CYP1B1	1.51081	0.198252	0.365202
P06493	Cyclin-dependent kinase 1 OS=Homo sapiens OX=9606 GN=CDK1 PE=1 SV=3	40	10	49	9	34.1	CDK1	1.49947	0.142846	0.458163
Q9BUA3	Spindlin interactor and repressor of chromatin-binding protein OS=Homo sapiens OX=9606 GN=SPINDOC PE=1 SV=3	9	3	12	3	41	SPINDOC	1.47526	0.255802	0.559949
P62081	Small ribosomal subunit protein eS7 OS=Homo sapiens OX=9606 GN=RPS7 PE=1 SV=1	19	4	10	4	22.1	RPS7	1.46142	0.105753	0.40443
ARI65764.1	hypothetical protein B7L74_04780 [Coxiella burnetii]	33	11	22	11	53.4	0	1.44775	0.304687	0.587292
P30041	Peroxiredoxin-6 OS=Homo sapiens OX=9606 GN=PRDX6 PE=1 SV=3	55	13	52	13	25	PRDX6	1.39952	0.190174	0.491187
Q9Y490	Talin-1 OS=Homo sapiens OX=9606 GN=TLN1 PE=1 SV=3	6	11	12	11	269.6	TLN1	1.34339	0.344803	0.609488
P35580	Myosin-10 OS=Homo sapiens OX=9606 GN=MYH10 PE=1 SV=3	4	9	36	5	228.9	MYH10	1.30757	0.32566	0.598195
Q08554	Desmocollin-1 OS=Homo sapiens OX=9606 GN=DSC1 PE=1 SV=2	8	7	32	7	99.9	DSC1	1.29609	0.0520962	0.302014
Q13561	Dy0ctin subunit 2 OS=Homo sapiens OX=9606 GN=DCTN2 PE=1 SV=4	13	5	25	5	44.2	DCTN2	1.28323	0.171267	0.486664
A0A0C4DH55	Immunoglobulin kappa variable 3D-7 OS=Homo sapiens OX=9606 GN=IGKV3D-7 PE=3 SV=5	8	1	3	1	13.1	IGKV3D-7	1.25629	0.255959	0.559949
Q12906	Interleukin enhancer-binding factor 3 OS=Homo sapiens OX=9606 GN=ILF3 PE=1 SV=3	15	12	36	12	95.3	ILF3	1.25013	0.235116	0.540187
Q9NV79	Protein-L-isoaspartate O-methyltransferase domain-containing protein 2 OS=Homo sapiens OX=9606 GN=PCMTD2 PE=1 SV=2	2	1	3	1	41	PCMTD2	1.23927	0.704425	0.839677
P62826	GTP-binding nuclear protein Ran OS=Homo sapiens OX=9606 GN=RAN PE=1 SV=3	37	7	43	7	24.4	RAN	1.22388	0.282114	0.573724
Q13242	Serine/arginine-rich splicing factor 9 OS=Homo sapiens OX=9606 GN=SRSF9 PE=1 SV=1	39	9	24	9	25.5	SRSF9	1.21781	0.450601	0.685582
P04075	Fructose-bisphosphate aldolase A OS=Homo sapiens OX=9606 GN=ALDOA PE=1 SV=2	20	8	24	7	39.4	ALDOA	1.21141	0.398915	0.652203
P42766	Large ribosomal subunit protein uL29 OS=Homo sapiens OX=9606 GN=RPL35 PE=1 SV=2	26	3	14	3	14.5	RPL35	1.19552	0.10671	0.40443
P49327	Fatty acid synthase OS=Homo sapiens OX=9606 GN=FASN PE=1 SV=3	36	67	250	67	273.3	FASN	1.17401	0.30862	0.588376
Q7Z5L2	Coiled-coil domain-containing protein R3HCC1L OS=Homo sapiens OX=9606 GN=R3HCC1L PE=1 SV=3	1	1	1	1	87.8	R3HCC1L	1.16234	0.26431	0.561114
P81605	Dermcidin OS=Homo sapiens OX=9606 GN=DCD PE=1 SV=2	43	5	31	5	11.3	DCD	1.13531	0.429142	0.672869
Q9UKM9	R0-binding protein Raly OS=Homo sapiens OX=9606 GN=RALY PE=1 SV=1	15	5	31	5	32.4	RALY	1.12825	0.134412	0.443862
Q08188	Protein-glutamine gamma-glutamyltransferase E OS=Homo sapiens OX=9606 GN=TGM3 PE=1 SV=4	17	10	23	10	76.6	TGM3	1.11549	0.265876	0.561114
P63241	Eukaryotic translation initiation factor 5A-1 OS=Homo sapiens OX=9606 GN=EIF5A PE=1 SV=2	31	4	20	4	16.8	EIF5A	1.11399	0.386135	0.644073
P11182	Lipoamide acyltransferase component of branched-chain alpha-keto acid dehydroge0se complex, mitochondrial OS=Homo sapiens OX=9606 GN=DBT PE=1 SV=3	2	1	2	1	53.5	0	1.04601	0.682701	0.827785
P25311	Zinc-alpha-2-glycoprotein OS=Homo sapiens OX=9606 GN=AZGP1 PE=1 SV=2	28	7	13	7	34.2	AZGP1	1.02685	0.524492	0.723025
ARI66394.1	ATPase [Coxiella burnetii]	2	1	1	1	47	0	1.00624	0.350943	0.617793
P14866	Heterogeneous nuclear ribonucleoprotein L OS=Homo sapiens OX=9606 GN=HNRNPL PE=1 SV=2	25	11	57	11	64.1	HNRNPL	0.998171	0.25019	0.558576
P05089	Argi0se-1 OS=Homo sapiens OX=9606 GN=ARG1 PE=1 SV=2	28	8	43	8	34.7	ARG1	0.973521	0.234216	0.539326
P10809	60 kDa heat shock protein, mitochondrial OS=Homo sapiens OX=9606 GN=HSPD1 PE=1 SV=2	46	23	91	23	61	HSPD1	0.973196	0.232573	0.536748
P01024	Complement C3 OS=Homo sapiens OX=9606 GN=C3 PE=1 SV=2	3	5	12	5	187	C3	0.956975	0.635993	0.79849
Q6DN03	Putative histone H2B type 2-C OS=Homo sapiens OX=9606 GN=H2BC20P PE=5 SV=3	20	5	38	1	21.5	H2BC20P	0.942528	0.630814	0.793196
P04040	Catalase OS=Homo sapiens OX=9606 GN=CAT PE=1 SV=3	11	6	15	6	59.7	CAT	0.936806	0.42193	0.668707
Q07955	Serine/arginine-rich splicing factor 1 OS=Homo sapiens OX=9606 GN=SRSF1 PE=1 SV=2	19	5	22	5	27.7	SRSF1	0.926599	0.275831	0.568833
P47929	Galectin-7 OS=Homo sapiens OX=9606 GN=LGALS7 PE=1 SV=2	23	3	6	3	15.1	LGALS7; LGALS7B	0.895586	0.492607	0.706575
P11940	Polyadenylate-binding protein 1 OS=Homo sapiens OX=9606 GN=PABPC1 PE=1 SV=2	43	30	232	22	70.6	PABPC1	0.891102	0.263318	0.561114
Q9NP78	ABC-type oligopeptide transporter ABCB9 OS=Homo sapiens OX=9606 GN=ABCB9 PE=1 SV=1	1	1	8	1	84.4	ABCB9	0.884813	0.590799	0.767067
P12956	X-ray repair cross-complementing protein 6 OS=Homo sapiens OX=9606 GN=XRCC6 PE=1 SV=2	55	30	222	30	69.8	XRCC6	0.878695	0.296097	0.587088
P06576	ATP synthase subunit beta, mitochondrial OS=Homo sapiens OX=9606 GN=ATP5F1B PE=1 SV=3	36	16	45	16	56.5	ATP5F1B	0.866117	0.691687	0.833946
P31327	Carbamoyl-phosphate synthase [ammonia], mitochondrial OS=Homo sapiens OX=9606 GN=CPS1 PE=1 SV=2	21	31	49	28	164.8	CPS1	0.856392	0.775487	0.874357
P78371	T-complex protein 1 subunit beta OS=Homo sapiens OX=9606 GN=CCT2 PE=1 SV=4	39	15	58	15	57.5	CCT2	0.826544	0.396878	0.65215
Q16643	Drebrin OS=Homo sapiens OX=9606 GN=DBN1 PE=1 SV=4	8	3	7	3	71.4	DBN1	0.824954	0.477488	0.694243
Q99832	T-complex protein 1 subunit eta OS=Homo sapiens OX=9606 GN=CCT7 PE=1 SV=2	22	11	54	11	59.3	CCT7	0.819434	0.362172	0.63011
Q96DG6	Carboxymethylenebutenolidase homolog OS=Homo sapiens OX=9606 GN=CMBL PE=1 SV=1	37	9	54	9	28	CMBL	0.818949	0.510563	0.712429
P00918	Carbonic anhydrase 2 OS=Homo sapiens OX=9606 GN=CA2 PE=1 SV=2	15	3	17	3	29.2	CA2	0.81235	0.562141	0.752542
P62899	Large ribosomal subunit protein eL31 OS=Homo sapiens OX=9606 GN=RPL31 PE=1 SV=1	30	4	13	4	14.5	RPL31	0.811433	0.508821	0.712429
Q93088	Betaine--homocysteine S-methyltransferase 1 OS=Homo sapiens OX=9606 GN=BHMT PE=1 SV=2	9	3	4	3	45	BHMT	0.7942	0.735296	0.853276
P00747	Plasminogen OS=Homo sapiens OX=9606 GN=PLG PE=1 SV=2	2	2	6	2	90.5	PLG	0.775625	0.375241	0.63698
Q6KCM7	Mitochondrial adenyl nucleotide antiporter SLC25A25 OS=Homo sapiens OX=9606 GN=SLC25A25 PE=1 SV=1	2	1	1	1	52.6	SLC25A25	0.731613	0.790723	0.879876
Q13618	Cullin-3 OS=Homo sapiens OX=9606 GN=CUL3 PE=1 SV=2	8	7	13	7	88.9	CUL3	0.726225	0.403259	0.657376
P21333	Filamin-A OS=Homo sapiens OX=9606 GN=FL0 PE=1 SV=4	11	20	50	18	280.6	FL0	0.718103	0.503733	0.710623
P07996	Thrombospondin-1 OS=Homo sapiens OX=9606 GN=THBS1 PE=1 SV=2	2	2	2	2	129.3	THBS1	0.70606	0.422811	0.669071
P00966	Argininosucci0te synthase OS=Homo sapiens OX=9606 GN=ASS1 PE=1 SV=2	10	5	7	5	46.5	ASS1	0.706017	0.730526	0.851589
O15247	Chloride intracellular channel protein 2 OS=Homo sapiens OX=9606 GN=CLIC2 PE=1 SV=3	6	1	13	1	28.3	CLIC2	0.699322	0.819715	0.892733
P22735	Protein-glutamine gamma-glutamyltransferase K OS=Homo sapiens OX=9606 GN=TGM1 PE=1 SV=4	6	4	13	4	89.7	TGM1	0.683929	0.627655	0.791531
Q9Y5V3	Melanoma-associated antigen D1 OS=Homo sapiens OX=9606 GN=MAGED1 PE=1 SV=3	1	1	3	1	86.1	MAGED1	0.66615	0.332128	0.602642
P68871	Hemoglobin subunit beta OS=Homo sapiens OX=9606 GN=HBB PE=1 SV=2	29	4	37	4	16	HBB	0.633859	0.719412	0.845763
P06753	Tropomyosin alpha-3 chain OS=Homo sapiens OX=9606 GN=TPM3 PE=1 SV=2	7	2	8	2	32.9	TPM3	0.627848	0.648797	0.806829
P22314	Ubiquitin-like modifier-activating enzyme 1 OS=Homo sapiens OX=9606 GN=UBA1 PE=1 SV=3	11	10	54	10	117.8	UBA1	0.609834	0.628138	0.791531
P60660	Myosin light polypeptide 6 OS=Homo sapiens OX=9606 GN=MYL6 PE=1 SV=2	58	8	43	8	16.9	MYL6	0.590977	0.640086	0.799069
O14950	Myosin regulatory light chain 12B OS=Homo sapiens OX=9606 GN=MYL12B PE=1 SV=2	22	4	16	4	19.8	MYL12B	0.589984	0.655598	0.81035
P02679	Fibrinogen gamma chain OS=Homo sapiens OX=9606 GN=FGG PE=1 SV=3	7	2	2	2	51.5	FGG	0.582474	0.718488	0.845763
O14979	Heterogeneous nuclear ribonucleoprotein D-like OS=Homo sapiens OX=9606 GN=HNRNPDL PE=1 SV=3	6	3	16	1	46.4	HNRNPDL	0.571031	0.261305	0.561114
P20618	Proteasome subunit beta type-1 OS=Homo sapiens OX=9606 GN=PSMB1 PE=1 SV=2	15	3	4	3	26.5	PSMB1	0.567424	0.598848	0.769916
P54105	Methylosome subunit pICln OS=Homo sapiens OX=9606 GN=CLNS1A PE=1 SV=1	16	2	6	2	26.2	CLNS1A	0.566164	0.631004	0.793196
P02649	Apolipoprotein E OS=Homo sapiens OX=9606 GN=APOE PE=1 SV=1	3	1	1	1	36.1	APOE	0.559762	0.705739	0.839677
P06733	Alpha-enolase OS=Homo sapiens OX=9606 GN=ENO1 PE=1 SV=2	26	10	35	9	47.1	ENO1	0.557723	0.144096	0.458163
Q15404	Ras suppressor protein 1 OS=Homo sapiens OX=9606 GN=RSU1 PE=1 SV=3	3	1	1	1	31.5	RSU1	0.544223	0.636988	0.798763
P20930	Filaggrin OS=Homo sapiens OX=9606 GN=FLG PE=1 SV=3	6	8	16	8	434.9	FLG	0.541997	0.590083	0.767067
Q07020	Large ribosomal subunit protein eL18 OS=Homo sapiens OX=9606 GN=RPL18 PE=1 SV=2	43	8	71	8	21.6	RPL18	0.531807	0.431141	0.673435
P07451	Carbonic anhydrase 3 OS=Homo sapiens OX=9606 GN=CA3 PE=1 SV=3	3	1	1	1	29.5	CA3	0.530121	0.765793	0.871917
P13010	X-ray repair cross-complementing protein 5 OS=Homo sapiens OX=9606 GN=XRCC5 PE=1 SV=3	48	33	234	33	82.7	XRCC5	0.522988	0.477926	0.694243
P61626	Lysozyme C OS=Homo sapiens OX=9606 GN=LYZ PE=1 SV=1	29	5	36	5	16.5	LYZ	0.518708	0.565916	0.753251
P13797	Plastin-3 OS=Homo sapiens OX=9606 GN=PLS3 PE=1 SV=4	26	13	50	13	70.8	PLS3	0.516272	0.638688	0.799069
Q92945	Far upstream element-binding protein 2 OS=Homo sapiens OX=9606 GN=KHSRP PE=1 SV=4	13	7	32	7	73.1	KHSRP	0.507805	0.677141	0.823962
O76003	Glutaredoxin-3 OS=Homo sapiens OX=9606 GN=GLRX3 PE=1 SV=2	6	2	7	2	37.4	GLRX3	0.495266	0.499493	0.708701
P31944	Caspase-14 OS=Homo sapiens OX=9606 GN=CASP14 PE=1 SV=2	62	16	24	16	27.7	CASP14	0.485523	0.80498	0.885133
P30050	Large ribosomal subunit protein uL11 OS=Homo sapiens OX=9606 GN=RPL12 PE=1 SV=1	64	8	60	8	17.8	RPL12	0.483875	0.584167	0.763346
P62333	26S proteasome regulatory subunit 10B OS=Homo sapiens OX=9606 GN=PSMC6 PE=1 SV=1	7	2	2	2	44.1	PSMC6	0.469073	0.742085	0.858245
P68366	Tubulin alpha-4A chain OS=Homo sapiens OX=9606 GN=TUBA4A PE=1 SV=1	53	22	449	2	49.9	TUBA4A	0.460501	0.84942	0.912102
Q9HC84	Mucin-5B OS=Homo sapiens OX=9606 GN=MUC5B PE=1 SV=3	1	6	7	5	596	MUC5B	0.458858	0.784251	0.876416
P19338	Nucleolin OS=Homo sapiens OX=9606 GN=NCL PE=1 SV=3	29	19	103	19	76.6	NCL	0.454528	0.519728	0.720324
P47914	Large ribosomal subunit protein eL29 OS=Homo sapiens OX=9606 GN=RPL29 PE=1 SV=2	9	1	4	1	17.7	RPL29	0.450607	0.706408	0.839677
P50990	T-complex protein 1 subunit theta OS=Homo sapiens OX=9606 GN=CCT8 PE=1 SV=4	31	16	67	16	59.6	CCT8	0.449842	0.662495	0.815806
O95255	ATP-binding cassette sub-family C member 6 OS=Homo sapiens OX=9606 GN=ABCC6 PE=1 SV=2	1	1	1	1	164.8	ABCC6	0.436976	0.587075	0.765135
P27105	Stomatin OS=Homo sapiens OX=9606 GN=STOM PE=1 SV=3	9	3	4	3	31.7	STOM	0.421725	0.640256	0.799069
P60709	Actin, cytoplasmic 1 OS=Homo sapiens OX=9606 GN=ACTB PE=1 SV=1	71	25	519	10	41.7	ACTB	0.413438	0.56255	0.752542
P28072	Proteasome subunit beta type-6 OS=Homo sapiens OX=9606 GN=PSMB6 PE=1 SV=4	13	3	10	3	25.3	PSMB6	0.404243	0.779855	0.874357
P51991	Heterogeneous nuclear ribonucleoprotein A3 OS=Homo sapiens OX=9606 GN=HNRNPA3 PE=1 SV=2	20	7	40	5	39.6	HNRNPA3	0.394748	0.571924	0.75385
P10599	Thioredoxin OS=Homo sapiens OX=9606 GN=TXN PE=1 SV=3	43	5	30	5	11.7	TXN	0.385766	0.690482	0.833946
A0A075B6S2	Immunoglobulin kappa variable 2D-29 OS=Homo sapiens OX=9606 GN=IGKV2D-29 PE=3 SV=1	34	6	1064	3	13.1	IGKV2D-29	0.380556	0.75942	0.866583
P20472	Parvalbumin alpha OS=Homo sapiens OX=9606 GN=PVALB PE=1 SV=2	7	1	1	1	12.1	PVALB	0.376063	0.723962	0.848245
P36578	Large ribosomal subunit protein uL4 OS=Homo sapiens OX=9606 GN=RPL4 PE=1 SV=5	39	18	121	18	47.7	RPL4	0.364484	0.664597	0.817366
P07737	Profilin-1 OS=Homo sapiens OX=9606 GN=PFN1 PE=1 SV=2	16	2	7	2	15	PFN1	0.362563	0.665353	0.817366
P24666	Low molecular weight phosphotyrosine protein phosphatase OS=Homo sapiens OX=9606 GN=ACP1 PE=1 SV=3	24	3	15	3	18	ACP1	0.360343	0.744353	0.858934
P05062	Fructose-bisphosphate aldolase B OS=Homo sapiens OX=9606 GN=ALDOB PE=1 SV=2	13	4	7	3	39.4	ALDOB	0.35768	0.812701	0.887919
P29508	Serpin B3 OS=Homo sapiens OX=9606 GN=SERPINB3 PE=1 SV=2	16	7	24	1	44.5	SERPINB3	0.350096	0.744332	0.858934
P22626	Heterogeneous nuclear ribonucleoproteins A2/B1 OS=Homo sapiens OX=9606 GN=HNRNPA2B1 PE=1 SV=2	53	17	105	14	37.4	HNRNPA2B1	0.34997	0.641123	0.799069
P06702	Protein S100-A9 OS=Homo sapiens OX=9606 GN=S100A9 PE=1 SV=1	67	8	44	8	13.2	S100A9	0.33417	0.768993	0.874357
O15131	Importin subunit alpha-6 OS=Homo sapiens OX=9606 GN=KP05 PE=1 SV=3	3	1	3	1	60.6	KP05	0.333032	0.679003	0.82525
P62937	Peptidyl-prolyl cis-trans isomerase A OS=Homo sapiens OX=9606 GN=PPIA PE=1 SV=2	41	9	83	9	18	PPIA	0.330931	0.688206	0.832494
Q00266	S-adenosylmethionine synthase isoform type-1 OS=Homo sapiens OX=9606 GN=MAT1A PE=1 SV=2	4	1	1	1	43.6	MAT1A	0.298564	0.803462	0.884411
P56537	Eukaryotic translation initiation factor 6 OS=Homo sapiens OX=9606 GN=EIF6 PE=1 SV=1	27	4	20	4	26.6	EIF6	0.289707	0.753653	0.862878
P10620	Microsomal glutathione S-transferase 1 OS=Homo sapiens OX=9606 GN=MGST1 PE=1 SV=1	10	1	1	1	17.6	MGST1	0.281436	0.761611	0.868118
P61353	Large ribosomal subunit protein eL27 OS=Homo sapiens OX=9606 GN=RPL27 PE=1 SV=2	51	7	51	7	15.8	RPL27	0.278127	0.713223	0.844845
P62424	Large ribosomal subunit protein eL8 OS=Homo sapiens OX=9606 GN=RPL7A PE=1 SV=2	33	11	98	11	30	RPL7A	0.276801	0.748226	0.861306
Q96A65	Exocyst complex component 4 OS=Homo sapiens OX=9606 GN=EXOC4 PE=1 SV=1	2	2	4	2	110.4	EXOC4	0.272873	0.719921	0.845763
P62847	Small ribosomal subunit protein eS24 OS=Homo sapiens OX=9606 GN=RPS24 PE=1 SV=1	26	3	15	3	15.4	RPS24	0.248073	0.829192	0.897345
Q6UWP8	Suprabasin OS=Homo sapiens OX=9606 GN=SBSN PE=1 SV=2	18	3	17	3	60.5	SBSN	0.246951	0.874321	0.930598
P09211	Glutathione S-transferase P OS=Homo sapiens OX=9606 GN=GSTP1 PE=1 SV=2	52	8	70	8	23.3	GSTP1	0.227103	0.69574	0.835701
P18124	Large ribosomal subunit protein uL30 OS=Homo sapiens OX=9606 GN=RPL7 PE=1 SV=1	42	15	99	15	29.2	RPL7	0.222045	0.775326	0.874357
P40227	T-complex protein 1 subunit zeta OS=Homo sapiens OX=9606 GN=CCT6A PE=1 SV=3	26	13	63	13	58	CCT6A	0.19719	0.830465	0.897776
P62241	Small ribosomal subunit protein eS8 OS=Homo sapiens OX=9606 GN=RPS8 PE=1 SV=2	39	10	71	10	24.2	RPS8	0.189469	0.796174	0.883014
P35579	Myosin-9 OS=Homo sapiens OX=9606 GN=MYH9 PE=1 SV=4	13	22	46	18	226.4	MYH9	0.188423	0.908643	0.95125
P62917	Large ribosomal subunit protein uL2 OS=Homo sapiens OX=9606 GN=RPL8 PE=1 SV=2	32	12	81	12	28	RPL8	0.177535	0.792229	0.879876
P61204	ADP-ribosylation factor 3 OS=Homo sapiens OX=9606 GN=ARF3 PE=1 SV=2	39	6	22	2	20.6	ARF3	0.17018	0.869133	0.929832
P14618	Pyruvate ki0se PKM OS=Homo sapiens OX=9606 GN=PKM PE=1 SV=4	53	27	195	26	57.9	PKM	0.16647	0.807184	0.886608
P54868	Hydroxymethylglutaryl-CoA synthase, mitochondrial OS=Homo sapiens OX=9606 GN=HMGCS2 PE=1 SV=1	4	2	2	2	56.6	HMGCS2	0.159508	0.903637	0.948911
O75390	Citrate synthase, mitochondrial OS=Homo sapiens OX=9606 GN=CS PE=1 SV=2	6	3	7	3	51.7	CS	0.137332	0.914174	0.952692
P32969	Large ribosomal subunit protein uL6 OS=Homo sapiens OX=9606 GN=RPL9 PE=1 SV=1	16	3	9	3	21.9	RPL9; RPL9P7; RPL9P8; RPL9P9	0.127414	0.945914	0.972378
P55769	NHP2-like protein 1 OS=Homo sapiens OX=9606 GN=SNU13 PE=1 SV=3	9	1	1	1	14.2	SNU13	0.123826	0.900762	0.948445
Q5RKV6	Exosome complex component MTR3 OS=Homo sapiens OX=9606 GN=EXOSC6 PE=1 SV=1	32	6	12	6	28.2	EXOSC6	0.123131	0.925524	0.960114
P60981	Destrin OS=Homo sapiens OX=9606 GN=DSTN PE=1 SV=3	7	1	1	1	18.5	DSTN	0.123099	0.810606	0.887919
P46940	Ras GTPase-activating-like protein IQGAP1 OS=Homo sapiens OX=9606 GN=IQGAP1 PE=1 SV=1	2	3	6	3	189.1	IQGAP1	0.119411	0.915204	0.952692
P11586	C-1-tetrahydrofolate synthase, cytoplasmic OS=Homo sapiens OX=9606 GN=MTHFD1 PE=1 SV=4	8	7	13	7	101.5	MTHFD1	0.110996	0.93658	0.968648
Q9P253	Vacuolar protein sorting-associated protein 18 homolog OS=Homo sapiens OX=9606 GN=VPS18 PE=1 SV=2	1	1	2	1	110.1	VPS18	0.102546	0.874872	0.930598
P61978	Heterogeneous nuclear ribonucleoprotein K OS=Homo sapiens OX=9606 GN=HNRNPK PE=1 SV=1	45	21	208	21	50.9	HNRNPK	0.101603	0.903472	0.948911
P07339	Cathepsin D OS=Homo sapiens OX=9606 GN=CTSD PE=1 SV=1	15	6	15	6	44.5	CTSD	0.099686	0.954183	0.976916
P02787	Serotransferrin OS=Homo sapiens OX=9606 GN=TF PE=1 SV=4	2	1	2	1	77	TF	0.0866807	0.958529	0.979511
P62906	Large ribosomal subunit protein uL1 OS=Homo sapiens OX=9606 GN=RPL10A PE=1 SV=2	41	11	65	11	24.8	RPL10A	0.0819607	0.90577	0.950004
Q9H6U6	BCAS3 microtubule associated cell migration factor OS=Homo sapiens OX=9606 GN=BCAS3 PE=1 SV=3	2	2	2	2	101.2	BCAS3	0.079043	0.944759	0.972378
O43865	S-adenosylhomocysteine hydrolase-like protein 1 OS=Homo sapiens OX=9606 GN=AHCYL1 PE=1 SV=2	2	1	2	1	58.9	AHCYL1	0.0758284	0.932877	0.966766
Q02878	Large ribosomal subunit protein eL6 OS=Homo sapiens OX=9606 GN=RPL6 PE=1 SV=3	42	12	80	12	32.7	RPL6	0.0682716	0.947375	0.972378
Q14151	Scaffold attachment factor B2 OS=Homo sapiens OX=9606 GN=SAFB2 PE=1 SV=1	6	4	19	4	107.4	SAFB2	0.0601487	0.967171	0.983033
P11277	Spectrin beta chain, erythrocytic OS=Homo sapiens OX=9606 GN=SPTB PE=1 SV=5	3	5	6	5	246.3	SPTB	0.0544389	0.966704	0.983033
P06312	Immunoglobulin kappa variable 4-1 OS=Homo sapiens OX=9606 GN=IGKV4-1 PE=1 SV=1	7	1	13	1	13.4	IGKV4-1	0.0362627	0.967718	0.983033
P31942	Heterogeneous nuclear ribonucleoprotein H3 OS=Homo sapiens OX=9606 GN=HNRNPH3 PE=1 SV=2	17	5	35	4	36.9	HNRNPH3	0.0322892	0.975336	0.987436
P35249	Replication factor C subunit 4 OS=Homo sapiens OX=9606 GN=RFC4 PE=1 SV=2	2	1	2	1	39.7	RFC4	0.030525	0.979439	0.988098
P50914	Large ribosomal subunit protein eL14 OS=Homo sapiens OX=9606 GN=RPL14 PE=1 SV=4	27	7	45	7	23.4	RPL14	0.021977	0.978149	0.988098
Q13642	Four and a half LIM domains protein 1 OS=Homo sapiens OX=9606 GN=FHL1 PE=1 SV=4	4	1	1	1	36.2	FHL1	0.0200048	0.9787	0.988098
Q9BZE4	GTP-binding protein 4 OS=Homo sapiens OX=9606 GN=GTPBP4 PE=1 SV=3	6	4	9	4	73.9	GTPBP4	0.0199175	0.984209	0.991348
Q9H583	HEAT repeat-containing protein 1 OS=Homo sapiens OX=9606 GN=HEATR1 PE=1 SV=3	1	2	4	2	242.2	HEATR1	0.0162893	0.986994	0.992795
P07355	Annexin A2 OS=Homo sapiens OX=9606 GN=ANXA2 PE=1 SV=2	35	11	42	11	38.6	ANXA2	0.011447	0.975898	0.987436
P48556	26S proteasome non-ATPase regulatory subunit 8 OS=Homo sapiens OX=9606 GN=PSMD8 PE=1 SV=2	9	3	7	3	39.6	PSMD8	0.00777442	0.992563	0.997419
P52272	Heterogeneous nuclear ribonucleoprotein M OS=Homo sapiens OX=9606 GN=HNRNPM PE=1 SV=3	61	49	982	49	77.5	HNRNPM	0.00217067	0.9979	1
P62820	Ras-related protein Rab-1A OS=Homo sapiens OX=9606 GN=RAB1A PE=1 SV=3	9	2	8	1	22.7	RAB1A	0.00150268	0.998786	1
P04406	Glyceraldehyde-3-phosphate dehydroge0se OS=Homo sapiens OX=9606 GN=GAPDH PE=1 SV=3	41	11	69	11	36	GAPDH	0	1	1
P07237	Protein disulfide-isomerase OS=Homo sapiens OX=9606 GN=P4HB PE=1 SV=3	16	8	17	8	57.1	P4HB	-0.00102465	0.999205	1
P07196	Neurofilament light polypeptide OS=Homo sapiens OX=9606 GN=NEFL PE=1 SV=3	15	9	38	6	61.5	NEFL	-0.00423182	0.997429	1
Q99741	Cell division control protein 6 homolog OS=Homo sapiens OX=9606 GN=CDC6 PE=1 SV=1	2	1	2	1	62.7	CDC6	-0.0162548	0.975006	0.987436
P62888	Large ribosomal subunit protein eL30 OS=Homo sapiens OX=9606 GN=RPL30 PE=1 SV=2	56	5	29	5	12.8	RPL30	-0.0178749	0.984591	0.991348
P61254	Large ribosomal subunit protein uL24 OS=Homo sapiens OX=9606 GN=RPL26 PE=1 SV=1	45	9	35	9	17.2	RPL26	-0.0309987	0.967345	0.983033
O95232	Luc7-like protein 3 OS=Homo sapiens OX=9606 GN=LUC7L3 PE=1 SV=2	6	2	8	2	51.4	LUC7L3	-0.0390045	0.964248	0.983033
O00411	D0-directed R0 polymerase, mitochondrial OS=Homo sapiens OX=9606 GN=POLRMT PE=1 SV=2	2	1	1	1	138.5	POLRMT	-0.0477465	0.942574	0.972378
P14923	Junction plakoglobin OS=Homo sapiens OX=9606 GN=JUP PE=1 SV=3	42	27	100	27	81.7	JUP	-0.0498266	0.948707	0.972378
P02730	Band 3 anion transport protein OS=Homo sapiens OX=9606 GN=SLC4A1 PE=1 SV=3	2	2	3	2	101.7	SLC4A1	-0.049953	0.938248	0.969397
P23435	Cerebellin-1 OS=Homo sapiens OX=9606 GN=CBLN1 PE=1 SV=1	4	1	8	1	21.1	CBLN1	-0.0531298	0.944566	0.972378
O95881	Thioredoxin domain-containing protein 12 OS=Homo sapiens OX=9606 GN=TXNDC12 PE=1 SV=1	52	11	207	11	19.2	TXNDC12	-0.0539565	0.948064	0.972378
P38606	V-type proton ATPase catalytic subunit A OS=Homo sapiens OX=9606 GN=ATP6V1A PE=1 SV=2	4	2	5	2	68.3	ATP6V1A	-0.0576388	0.946444	0.972378
P48047	ATP synthase subunit O, mitochondrial OS=Homo sapiens OX=9606 GN=ATP5PO PE=1 SV=1	12	2	5	2	23.3	ATP5PO	-0.0680391	0.969748	0.984122
P00326	Alcohol dehydroge0se 1C OS=Homo sapiens OX=9606 GN=ADH1C PE=1 SV=2	5	2	2	2	39.8	ADH1C	-0.073805	0.962126	0.98221
Q6ZVX7	F-box only protein 50 OS=Homo sapiens OX=9606 GN=NCCRP1 PE=1 SV=1	7	2	9	2	30.8	NCCRP1	-0.0841819	0.822844	0.894245
P32119	Peroxiredoxin-2 OS=Homo sapiens OX=9606 GN=PRDX2 PE=1 SV=5	41	10	82	9	21.9	PRDX2	-0.0965018	0.899969	0.948445
Q9UBM7	7-dehydrocholesterol reductase OS=Homo sapiens OX=9606 GN=DHCR7 PE=1 SV=1	3	2	3	2	54.5	DHCR7	-0.0996301	0.888701	0.938988
P49720	Proteasome subunit beta type-3 OS=Homo sapiens OX=9606 GN=PSMB3 PE=1 SV=2	12	2	6	2	22.9	PSMB3	-0.104043	0.901346	0.948445
P07910	Heterogeneous nuclear ribonucleoproteins C1/C2 OS=Homo sapiens OX=9606 GN=HNRNPC PE=1 SV=4	41	16	195	16	33.7	HNRNPC	-0.105956	0.882955	0.93484
P61962	DDB1- and CUL4-associated factor 7 OS=Homo sapiens OX=9606 GN=DCAF7 PE=1 SV=1	3	1	3	1	38.9	DCAF7	-0.110547	0.911016	0.952692
Q9UMS4	Pre-mR0-processing factor 19 OS=Homo sapiens OX=9606 GN=PRPF19 PE=1 SV=1	15	6	13	6	55.1	PRPF19	-0.120706	0.914763	0.952692
Q96FE5	Leucine-rich repeat and immunoglobulin-like domain-containing nogo receptor-interacting protein 1 OS=Homo sapiens OX=9606 GN=LINGO1 PE=1 SV=2	3	1	1	1	69.8	LINGO1	-0.121761	0.955038	0.976916
P08243	Asparagine synthetase [glutamine-hydrolyzing] OS=Homo sapiens OX=9606 GN=ASNS PE=1 SV=4	2	1	6	1	64.3	ASNS	-0.139706	0.915189	0.952692
Q9Y6G9	Cytoplasmic dynein 1 light intermediate chain 1 OS=Homo sapiens OX=9606 GN=DYNC1LI1 PE=1 SV=3	2	1	1	1	56.5	DYNC1LI1	-0.150123	0.915586	0.952692
P23528	Cofilin-1 OS=Homo sapiens OX=9606 GN=CFL1 PE=1 SV=3	32	4	17	4	18.5	CFL1	-0.153091	0.875629	0.930598
O60506	Heterogeneous nuclear ribonucleoprotein Q OS=Homo sapiens OX=9606 GN=SYNCRIP PE=1 SV=2	12	7	32	4	69.6	SYNCRIP	-0.157363	0.933893	0.966843
Q6PKG0	La-related protein 1 OS=Homo sapiens OX=9606 GN=LARP1 PE=1 SV=2	3	3	8	3	123.4	LARP1	-0.160608	0.877828	0.931043
P01040	Cystatin-A OS=Homo sapiens OX=9606 GN=CSTA PE=1 SV=1	27	2	4	2	11	CSTA	-0.162461	0.825277	0.894995
Q96QA5	Gasdermin-A OS=Homo sapiens OX=9606 GN=GSDMA PE=1 SV=4	4	2	5	2	49.3	GSDMA	-0.163508	0.894235	0.943864
O00264	Membrane-associated progesterone receptor component 1 OS=Homo sapiens OX=9606 GN=PGRMC1 PE=1 SV=3	4	1	5	1	21.7	PGRMC1	-0.16597	0.813748	0.888118
P09651	Heterogeneous nuclear ribonucleoprotein A1 OS=Homo sapiens OX=9606 GN=HNRNPA1 PE=1 SV=5	27	10	57	7	38.7	HNRNPA1	-0.167791	0.917796	0.953708
P31153	S-adenosylmethionine synthase isoform type-2 OS=Homo sapiens OX=9606 GN=MAT2A PE=1 SV=1	19	7	16	7	43.6	MAT2A	-0.187767	0.802711	0.884411
P10720	Platelet factor 4 variant OS=Homo sapiens OX=9606 GN=PF4V1 PE=1 SV=1	9	1	1	1	11.5	PF4V1	-0.194092	0.884879	0.935912
P06732	Creatine ki0se M-type OS=Homo sapiens OX=9606 GN=CKM PE=1 SV=2	12	3	4	3	43.1	CKM	-0.20091	0.875516	0.930598
P00367	Glutamate dehydroge0se 1, mitochondrial OS=Homo sapiens OX=9606 GN=GLUD1 PE=1 SV=2	9	5	8	5	61.4	GLUD1	-0.203895	0.878462	0.931043
O75494	Serine/arginine-rich splicing factor 10 OS=Homo sapiens OX=9606 GN=SRSF10 PE=1 SV=1	23	6	16	6	31.3	SRSF10	-0.205199	0.777454	0.874357
P51649	Succi0te-semialdehyde dehydroge0se, mitochondrial OS=Homo sapiens OX=9606 GN=ALDH5A1 PE=1 SV=2	3	2	6	2	57.2	ALDH5A1	-0.20981	0.849933	0.912102
Q96P63	Serpin B12 OS=Homo sapiens OX=9606 GN=SERPINB12 PE=1 SV=1	15	6	25	6	46.2	SERPINB12	-0.21088	0.709336	0.842183
P05090	Apolipoprotein D OS=Homo sapiens OX=9606 GN=APOD PE=1 SV=1	15	3	9	3	21.3	APOD	-0.211238	0.87421	0.930598
P05388	Large ribosomal subunit protein uL10 OS=Homo sapiens OX=9606 GN=RPLP0 PE=1 SV=1	38	15	129	15	34.3	RPLP0	-0.211589	0.7983	0.883463
Q07666	KH domain-containing, R0-binding, sig0l transduction-associated protein 1 OS=Homo sapiens OX=9606 GN=KHDRBS1 PE=1 SV=1	7	3	9	3	48.2	KHDRBS1	-0.213343	0.872784	0.930598
P35268	Large ribosomal subunit protein eL22 OS=Homo sapiens OX=9606 GN=RPL22 PE=1 SV=2	9	1	2	1	14.8	RPL22	-0.214441	0.832204	0.898609
P31946	14-3-3 protein beta/alpha OS=Homo sapiens OX=9606 GN=YWHAB PE=1 SV=3	30	8	70	2	28.1	YWHAB	-0.216453	0.91842	0.953708
P41250	Glycine--tR0 ligase OS=Homo sapiens OX=9606 GN=GARS1 PE=1 SV=3	3	2	2	2	83.1	GARS1	-0.217552	0.832985	0.898609
P01859	Immunoglobulin heavy constant gamma 2 OS=Homo sapiens OX=9606 GN=IGHG2 PE=1 SV=3	2	1	29	1	43.8	IGHG2	-0.219161	0.836311	0.900306
P05387	Large ribosomal subunit protein P2 OS=Homo sapiens OX=9606 GN=RPLP2 PE=1 SV=1	48	4	31	4	11.7	RPLP2	-0.220229	0.800898	0.88369
P08758	Annexin A5 OS=Homo sapiens OX=9606 GN=ANXA5 PE=1 SV=2	6	2	7	2	35.9	ANXA5	-0.221487	0.87623	0.930598
O95347	Structural mainte0nce of chromosomes protein 2 OS=Homo sapiens OX=9606 GN=SMC2 PE=1 SV=2	3	3	5	3	135.6	SMC2	-0.221672	0.906528	0.950004
P62750	Large ribosomal subunit protein uL23 OS=Homo sapiens OX=9606 GN=RPL23A PE=1 SV=1	28	5	24	5	17.7	RPL23A	-0.221829	0.777748	0.874357
Q13867	Bleomycin hydrolase OS=Homo sapiens OX=9606 GN=BLMH PE=1 SV=1	11	4	9	4	52.5	BLMH	-0.228643	0.653861	0.81035
P39060	Collagen alpha-1(XVIII) chain OS=Homo sapiens OX=9606 GN=COL18A1 PE=1 SV=5	3	4	14	4	178.1	COL18A1	-0.228972	0.863669	0.925875
Q13162	Peroxiredoxin-4 OS=Homo sapiens OX=9606 GN=PRDX4 PE=1 SV=1	21	6	53	3	30.5	PRDX4	-0.231089	0.869171	0.929832
Q9NWS0	PIH1 domain-containing protein 1 OS=Homo sapiens OX=9606 GN=PIH1D1 PE=1 SV=1	3	1	1	1	32.3	PIH1D1	-0.242845	0.670392	0.82159
P15170	Eukaryotic peptide chain release factor GTP-binding subunit ERF3A OS=Homo sapiens OX=9606 GN=GSPT1 PE=1 SV=1	4	2	5	2	55.7	GSPT1	-0.244929	0.845105	0.90882
Q8NE71	ATP-binding cassette sub-family F member 1 OS=Homo sapiens OX=9606 GN=ABCF1 PE=1 SV=2	1	1	1	1	95.9	ABCF1	-0.248195	0.569355	0.753251
Q9BRL6	Serine/arginine-rich splicing factor 8 OS=Homo sapiens OX=9606 GN=SRSF8 PE=1 SV=1	3	1	6	1	32.3	SRSF8	-0.252926	0.81212	0.887919
Q9BZV1	UBX domain-containing protein 6 OS=Homo sapiens OX=9606 GN=UBXN6 PE=1 SV=1	5	1	2	1	49.7	UBXN6	-0.256815	0.82458	0.894995
Q9UKV3	Apoptotic chromatin condensation inducer in the nucleus OS=Homo sapiens OX=9606 GN=ACIN1 PE=1 SV=2	1	2	3	2	151.8	ACIN1	-0.261425	0.790378	0.879876
Q5D862	Filaggrin-2 OS=Homo sapiens OX=9606 GN=FLG2 PE=1 SV=1	9	9	40	9	247.9	FLG2	-0.275481	0.772713	0.874357
P31943	Heterogeneous nuclear ribonucleoprotein H OS=Homo sapiens OX=9606 GN=HNRNPH1 PE=1 SV=4	54	17	224	8	49.2	HNRNPH1	-0.275979	0.655132	0.81035
O43818	U3 small nucleolar R0-interacting protein 2 OS=Homo sapiens OX=9606 GN=RRP9 PE=1 SV=1	6	3	4	3	51.8	RRP9	-0.276042	0.816418	0.890086
Q8WUM0	Nuclear pore complex protein Nup133 OS=Homo sapiens OX=9606 GN=NUP133 PE=1 SV=2	4	3	3	3	128.9	NUP133	-0.277444	0.654998	0.81035
P49207	Large ribosomal subunit protein eL34 OS=Homo sapiens OX=9606 GN=RPL34 PE=1 SV=3	15	3	14	3	13.3	RPL34	-0.278697	0.826271	0.895127
P14174	Macrophage migration inhibitory factor OS=Homo sapiens OX=9606 GN=MIF PE=1 SV=4	14	2	10	2	12.5	MIF	-0.281124	0.684197	0.828621
Q13185	Chromobox protein homolog 3 OS=Homo sapiens OX=9606 GN=CBX3 PE=1 SV=4	22	3	5	3	20.8	CBX3	-0.290519	0.468114	0.693728
P18754	Regulator of chromosome condensation OS=Homo sapiens OX=9606 GN=RCC1 PE=1 SV=1	2	1	7	1	44.9	RCC1	-0.292081	0.773769	0.874357
Q9UM00	Calcium load-activated calcium channel OS=Homo sapiens OX=9606 GN=TMCO1 PE=1 SV=2	6	1	2	1	27.1	TMCO1	-0.295679	0.7199	0.845763
Q01469	Fatty acid-binding protein 5 OS=Homo sapiens OX=9606 GN=FABP5 PE=1 SV=3	13	2	12	2	15.2	FABP5	-0.299248	0.468549	0.693728
ARI65131.1	D0-directed R0 polymerase subunit beta' [Coxiella burnetii]	1	1	5	1	157	rpoC	-0.301145	0.792089	0.879876
P31930	Cytochrome b-c1 complex subunit 1, mitochondrial OS=Homo sapiens OX=9606 GN=UQCRC1 PE=1 SV=3	1	1	1	1	52.6	UQCRC1	-0.30193	0.773063	0.874357
Q86YZ3	Hornerin OS=Homo sapiens OX=9606 GN=HRNR PE=1 SV=2	41	47	280	47	282.2	HRNR	-0.30209	0.462154	0.690867
P02790	Hemopexin OS=Homo sapiens OX=9606 GN=HPX PE=1 SV=2	2	1	1	1	51.6	HPX	-0.306863	0.718114	0.845763
Q9H4L4	Sentrin-specific protease 3 OS=Homo sapiens OX=9606 GN=SENP3 PE=1 SV=2	2	1	1	1	65	SENP3	-0.313045	0.801086	0.88369
P25786	Proteasome subunit alpha type-1 OS=Homo sapiens OX=9606 GN=PSMA1 PE=1 SV=1	12	3	3	3	29.5	PSMA1	-0.314928	0.720587	0.845763
P16157	Ankyrin-1 OS=Homo sapiens OX=9606 GN=ANK1 PE=1 SV=3	3	3	3	3	206.1	ANK1	-0.319445	0.745202	0.858948
P12955	Xaa-Pro dipeptidase OS=Homo sapiens OX=9606 GN=PEPD PE=1 SV=3	5	3	7	3	54.5	PEPD	-0.32616	0.834445	0.89924
P49959	Double-strand break repair protein MRE11 OS=Homo sapiens OX=9606 GN=MRE11 PE=1 SV=3	2	1	2	1	80.5	MRE11	-0.326236	0.758277	0.866241
O75367	Core histone macro-H2A.1 OS=Homo sapiens OX=9606 GN=MACROH2A1 PE=1 SV=5	34	9	52	7	39.2	MACROH2A1	-0.326609	0.59899	0.769916
P18077	Large ribosomal subunit protein eL33 OS=Homo sapiens OX=9606 GN=RPL35A PE=1 SV=2	39	6	42	6	12.5	RPL35A	-0.326697	0.783073	0.876052
Q15269	Periodic tryptophan protein 2 homolog OS=Homo sapiens OX=9606 GN=PWP2 PE=1 SV=2	2	2	3	2	102.4	PWP2	-0.33147	0.752159	0.862878
P42357	Histidine ammonia-lyase OS=Homo sapiens OX=9606 GN=HAL PE=1 SV=1	12	6	9	6	72.7	HAL	-0.331864	0.748925	0.861306
Q8WWY3	U4/U6 small nuclear ribonucleoprotein Prp31 OS=Homo sapiens OX=9606 GN=PRPF31 PE=1 SV=2	9	3	9	3	55.4	PRPF31	-0.33744	0.821531	0.893763
P31151	Protein S100-A7 OS=Homo sapiens OX=9606 GN=S100A7 PE=1 SV=4	22	2	5	2	11.5	S100A7	-0.346159	0.724354	0.848245
P02675	Fibrinogen beta chain OS=Homo sapiens OX=9606 GN=FGB PE=1 SV=2	3	2	4	2	55.9	FGB	-0.34906	0.812647	0.887919
P14625	Endoplasmin OS=Homo sapiens OX=9606 GN=HSP90B1 PE=1 SV=1	10	9	36	7	92.4	HSP90B1	-0.35026	0.782271	0.876052
Q08211	ATP-dependent R0 helicase A OS=Homo sapiens OX=9606 GN=DHX9 PE=1 SV=4	27	29	193	29	140.9	DHX9	-0.350309	0.733162	0.852727
Q8NEY8	Periphilin-1 OS=Homo sapiens OX=9606 GN=PPHLN1 PE=1 SV=2	2	1	6	1	52.7	PPHLN1	-0.352416	0.779819	0.874357
P01042	Kininogen-1 OS=Homo sapiens OX=9606 GN=KNG1 PE=1 SV=2	1	1	2	1	71.9	KNG1	-0.354584	0.787317	0.878885
P23246	Splicing factor, proline- and glutamine-rich OS=Homo sapiens OX=9606 GN=SFPQ PE=1 SV=2	14	8	27	7	76.1	SFPQ	-0.355528	0.800649	0.88369
Q71RC2	La-related protein 4 OS=Homo sapiens OX=9606 GN=LARP4 PE=1 SV=3	2	1	4	1	80.5	LARP4	-0.364881	0.726843	0.850192
Q02543	Large ribosomal subunit protein eL20 OS=Homo sapiens OX=9606 GN=RPL18A PE=1 SV=2	33	7	46	7	20.7	RPL18A	-0.369943	0.500588	0.708701
P00441	Superoxide dismutase [Cu-Zn] OS=Homo sapiens OX=9606 GN=SOD1 PE=1 SV=2	6	1	1	1	15.9	SOD1	-0.370039	0.701437	0.839677
P62191	26S proteasome regulatory subunit 4 OS=Homo sapiens OX=9606 GN=PSMC1 PE=1 SV=1	7	2	3	2	49.2	PSMC1	-0.378291	0.554105	0.747788
P60174	Triosephosphate isomerase OS=Homo sapiens OX=9606 GN=TPI1 PE=1 SV=4	13	3	3	3	26.7	TPI1	-0.381466	0.798026	0.883463
P84103	Serine/arginine-rich splicing factor 3 OS=Homo sapiens OX=9606 GN=SRSF3 PE=1 SV=1	18	4	28	3	19.3	SRSF3	-0.382965	0.681375	0.827154
P55209	Nucleosome assembly protein 1-like 1 OS=Homo sapiens OX=9606 GN=0P1L1 PE=1 SV=1	17	5	7	5	45.3	0P1L1	-0.387562	0.776863	0.874357
P42285	Exosome R0 helicase MTR4 OS=Homo sapiens OX=9606 GN=MTREX PE=1 SV=3	2	2	8	2	117.7	MTREX	-0.391316	0.563491	0.752542
P01860	Immunoglobulin heavy constant gamma 3 OS=Homo sapiens OX=9606 GN=IGHG3 PE=1 SV=3	4	2	13	1	49.1	IGHG3	-0.392328	0.777672	0.874357
O75643	U5 small nuclear ribonucleoprotein 200 kDa helicase OS=Homo sapiens OX=9606 GN=SNRNP200 PE=1 SV=2	4	7	13	7	244.4	SNRNP200	-0.397252	0.556468	0.74977
P23141	Liver carboxylesterase 1 OS=Homo sapiens OX=9606 GN=CES1 PE=1 SV=2	1	1	1	1	62.5	CES1	-0.39908	0.719414	0.845763
P62910	Large ribosomal subunit protein eL32 OS=Homo sapiens OX=9606 GN=RPL32 PE=1 SV=2	21	3	9	3	15.9	RPL32	-0.401158	0.673894	0.823962
P61981	14-3-3 protein gamma OS=Homo sapiens OX=9606 GN=YWHAG PE=1 SV=2	23	6	61	2	28.3	YWHAG	-0.413948	0.676136	0.823962
Q9UHB9	Sig0l recognition particle subunit SRP68 OS=Homo sapiens OX=9606 GN=SRP68 PE=1 SV=2	9	3	4	3	70.7	SRP68	-0.426243	0.705404	0.839677
Q96GQ7	Probable ATP-dependent R0 helicase DDX27 OS=Homo sapiens OX=9606 GN=DDX27 PE=1 SV=2	6	4	13	4	89.8	DDX27	-0.430255	0.662461	0.815806
Q99961	Endophilin-A2 OS=Homo sapiens OX=9606 GN=SH3GL1 PE=1 SV=1	2	1	3	1	41.5	SH3GL1	-0.430348	0.705062	0.839677
Q06830	Peroxiredoxin-1 OS=Homo sapiens OX=9606 GN=PRDX1 PE=1 SV=1	51	12	110	8	22.1	PRDX1	-0.432012	0.6132	0.782951
Q96J01	THO complex subunit 3 OS=Homo sapiens OX=9606 GN=THOC3 PE=1 SV=1	3	1	1	1	38.7	THOC3	-0.432179	0.453571	0.686638
O15091	Mitochondrial ribonuclease P catalytic subunit OS=Homo sapiens OX=9606 GN=PRORP PE=1 SV=2	2	1	1	1	67.3	PRORP	-0.433819	0.792488	0.879876
Q03393	6-pyruvoyl tetrahydrobiopterin synthase OS=Homo sapiens OX=9606 GN=PTS PE=1 SV=1	6	1	3	1	16.4	PTS	-0.439364	0.623783	0.78992
Q6UB35	Monofunctio0l C1-tetrahydrofolate synthase, mitochondrial OS=Homo sapiens OX=9606 GN=MTHFD1L PE=1 SV=1	4	4	5	4	105.7	MTHFD1L	-0.439703	0.756493	0.865165
P13667	Protein disulfide-isomerase A4 OS=Homo sapiens OX=9606 GN=PDIA4 PE=1 SV=2	7	3	6	3	72.9	PDIA4	-0.443306	0.691891	0.833946
Q7Z4V0	Zinc finger protein 438 OS=Homo sapiens OX=9606 GN=ZNF438 PE=1 SV=1	1	1	11	1	91.8	ZNF438	-0.443355	0.594087	0.769916
P38159	R0-binding motif protein, X chromosome OS=Homo sapiens OX=9606 GN=RBMX PE=1 SV=3	30	12	65	12	42.3	RBMX	-0.444098	0.736336	0.853519
Q7L2E3	ATP-dependent R0 helicase DHX30 OS=Homo sapiens OX=9606 GN=DHX30 PE=1 SV=1	8	8	27	8	133.9	DHX30	-0.452757	0.810796	0.887919
A0A0C4DH31	Immunoglobulin heavy variable 1-18 OS=Homo sapiens OX=9606 GN=IGHV1-18 PE=3 SV=1	9	1	4	1	12.8	IGHV1-18	-0.45453	0.728382	0.851022
Q2TAL8	Transcriptio0l regulator QRICH1 OS=Homo sapiens OX=9606 GN=QRICH1 PE=1 SV=1	1	1	3	1	86.4	QRICH1	-0.456266	0.692654	0.833946
P25789	Proteasome subunit alpha type-4 OS=Homo sapiens OX=9606 GN=PSMA4 PE=1 SV=1	10	3	11	3	29.5	PSMA4	-0.464349	0.735112	0.853276
P62753	Small ribosomal subunit protein eS6 OS=Homo sapiens OX=9606 GN=RPS6 PE=1 SV=1	33	8	44	8	28.7	RPS6	-0.469367	0.512544	0.714223
P51114	R0-binding protein FXR1 OS=Homo sapiens OX=9606 GN=FXR1 PE=1 SV=3	5	3	11	3	69.7	FXR1	-0.471871	0.753015	0.862878
P42765	3-ketoacyl-CoA thiolase, mitochondrial OS=Homo sapiens OX=9606 GN=ACAA2 PE=1 SV=2	2	1	1	1	41.9	ACAA2	-0.478884	0.605194	0.775948
P38117	Electron transfer flavoprotein subunit beta OS=Homo sapiens OX=9606 GN=ETFB PE=1 SV=3	11	3	3	3	27.8	ETFB	-0.481466	0.552506	0.74661
P11498	Pyruvate carboxylase, mitochondrial OS=Homo sapiens OX=9606 GN=PC PE=1 SV=2	1	1	1	1	129.6	PC	-0.487187	0.616874	0.785043
Q9UPS8	Ankyrin repeat domain-containing protein 26 OS=Homo sapiens OX=9606 GN=ANKRD26 PE=1 SV=4	1	1	3	1	196.3	ANKRD26	-0.489802	0.705558	0.839677
Q16352	Alpha-internexin OS=Homo sapiens OX=9606 GN=I0 PE=1 SV=2	12	7	30	3	55.4	I0	-0.497311	0.640783	0.799069
Q9UQ35	Serine/arginine repetitive matrix protein 2 OS=Homo sapiens OX=9606 GN=SRRM2 PE=1 SV=2	4	7	16	7	299.4	SRRM2	-0.497865	0.521098	0.720574
P22234	Bifunctio0l phosphoribosylaminoimidazole carboxylase/phosphoribosylaminoimidazole succinocarboxamide synthetase OS=Homo sapiens OX=9606 GN=PAICS PE=1 SV=3	8	3	12	3	47	PAICS	-0.4999	0.618551	0.786203
P30048	Thioredoxin-dependent peroxide reductase, mitochondrial OS=Homo sapiens OX=9606 GN=PRDX3 PE=1 SV=3	13	3	13	3	27.7	PRDX3	-0.510045	0.598044	0.769916
Q15517	Corneodesmosin OS=Homo sapiens OX=9606 GN=CDSN PE=1 SV=3	7	3	11	3	51.5	0	-0.521038	0.733023	0.852727
P30566	Adenylosucci0te lyase OS=Homo sapiens OX=9606 GN=ADSL PE=1 SV=2	5	2	5	2	54.9	ADSL	-0.523562	0.570604	0.753251
P48735	Isocitrate dehydroge0se [0DP], mitochondrial OS=Homo sapiens OX=9606 GN=IDH2 PE=1 SV=2	2	1	1	1	50.9	IDH2	-0.529796	0.729421	0.851267
P39019	Small ribosomal subunit protein eS19 OS=Homo sapiens OX=9606 GN=RPS19 PE=1 SV=2	11	2	4	2	16.1	RPS19	-0.535546	0.701363	0.839677
O00425	Insulin-like growth factor 2 mR0-binding protein 3 OS=Homo sapiens OX=9606 GN=IGF2BP3 PE=1 SV=2	16	7	22	5	63.7	IGF2BP3	-0.539236	0.387853	0.644073
P23526	Adenosylhomocystei0se OS=Homo sapiens OX=9606 GN=AHCY PE=1 SV=4	12	5	8	5	47.7	AHCY	-0.539876	0.674241	0.823962
P05109	Protein S100-A8 OS=Homo sapiens OX=9606 GN=S100A8 PE=1 SV=1	60	8	25	8	10.8	S100A8	-0.540921	0.737189	0.853544
P15927	Replication protein A 32 kDa subunit OS=Homo sapiens OX=9606 GN=RPA2 PE=1 SV=1	4	1	3	1	29.2	RPA2	-0.5467	0.716529	0.845763
A6NHR9	Structural mainte0nce of chromosomes flexible hinge domain-containing protein 1 OS=Homo sapiens OX=9606 GN=SMCHD1 PE=1 SV=2	3	6	11	6	226.2	SMCHD1	-0.549904	0.486233	0.699736
P55072	Transitio0l endoplasmic reticulum ATPase OS=Homo sapiens OX=9606 GN=VCP PE=1 SV=4	9	7	9	7	89.3	VCP	-0.554515	0.752846	0.862878
Q99848	Probable rR0-processing protein EBP2 OS=Homo sapiens OX=9606 GN=EB01BP2 PE=1 SV=2	3	1	3	1	34.8	EB01BP2	-0.55473	0.660686	0.815534
Q08J23	R0 cytosine C(5)-methyltransferase NSUN2 OS=Homo sapiens OX=9606 GN=NSUN2 PE=1 SV=2	1	1	2	1	86.4	NSUN2	-0.558943	0.481202	0.695069
Q16875	6-phosphofructo-2-ki0se/fructose-2,6-bisphosphatase 3 OS=Homo sapiens OX=9606 GN=PFKFB3 PE=1 SV=1	12	6	13	6	59.6	PFKFB3	-0.5595	0.567507	0.753251
P01008	Antithrombin-III OS=Homo sapiens OX=9606 GN=SERPINC1 PE=1 SV=1	2	1	1	1	52.6	SERPINC1	-0.5627	0.596723	0.769916
P05386	Large ribosomal subunit protein P1 OS=Homo sapiens OX=9606 GN=RPLP1 PE=1 SV=1	14	1	19	1	11.5	RPLP1	-0.564614	0.436707	0.673786
P28070	Proteasome subunit beta type-4 OS=Homo sapiens OX=9606 GN=PSMB4 PE=1 SV=4	4	1	5	1	29.2	PSMB4	-0.567185	0.54359	0.738343
P06396	Gelsolin OS=Homo sapiens OX=9606 GN=GSN PE=1 SV=1	5	3	5	3	85.6	GSN	-0.572484	0.712715	0.844845
Q15061	WD repeat-containing protein 43 OS=Homo sapiens OX=9606 GN=WDR43 PE=1 SV=3	3	2	4	2	74.8	WDR43	-0.578524	0.0790306	0.354984
P67809	Y-box-binding protein 1 OS=Homo sapiens OX=9606 GN=YBX1 PE=1 SV=3	54	11	41	7	35.9	YBX1	-0.590333	0.677135	0.823962
O43347	R0-binding protein Musashi homolog 1 OS=Homo sapiens OX=9606 GN=MSI1 PE=1 SV=1	5	1	1	1	39.1	MSI1	-0.590693	0.427504	0.671325
P34897	Serine hydroxymethyltransferase, mitochondrial OS=Homo sapiens OX=9606 GN=SHMT2 PE=1 SV=3	6	3	6	3	56	SHMT2	-0.594576	0.50168	0.708701
P48643	T-complex protein 1 subunit epsilon OS=Homo sapiens OX=9606 GN=CCT5 PE=1 SV=1	12	6	26	5	59.6	CCT5	-0.595873	0.507158	0.712429
P50991	T-complex protein 1 subunit delta OS=Homo sapiens OX=9606 GN=CCT4 PE=1 SV=4	33	16	67	15	57.9	CCT4	-0.601768	0.507524	0.712429
P50395	Rab GDP dissociation inhibitor beta OS=Homo sapiens OX=9606 GN=GDI2 PE=1 SV=2	13	4	15	4	50.6	GDI2	-0.603617	0.542188	0.73802
P12268	Inosine-5'-monophosphate dehydroge0se 2 OS=Homo sapiens OX=9606 GN=IMPDH2 PE=1 SV=2	24	11	58	11	55.8	IMPDH2	-0.604607	0.409444	0.659882
P61313	Large ribosomal subunit protein eL15 OS=Homo sapiens OX=9606 GN=RPL15 PE=1 SV=2	43	9	58	9	24.1	RPL15	-0.60733	0.623446	0.78992
P0DOY2	Immunoglobulin lambda constant 2 OS=Homo sapiens OX=9606 GN=IGLC2 PE=1 SV=1	24	2	10	1	11.3	IGLC2	-0.607577	0.778188	0.874357
Q15036	Sorting nexin-17 OS=Homo sapiens OX=9606 GN=SNX17 PE=1 SV=1	11	3	4	3	52.9	SNX17	-0.608116	0.518671	0.719832
Q8N122	Regulatory-associated protein of mTOR OS=Homo sapiens OX=9606 GN=RPTOR PE=1 SV=1	1	1	2	1	148.9	RPTOR	-0.608807	0.388827	0.644073
P00167	Cytochrome b5 OS=Homo sapiens OX=9606 GN=CYB5A PE=1 SV=2	25	2	2	2	15.3	CYB5A	-0.611519	0.557765	0.74977
P25788	Proteasome subunit alpha type-3 OS=Homo sapiens OX=9606 GN=PSMA3 PE=1 SV=2	8	2	6	2	28.4	PSMA3	-0.614492	0.569182	0.753251
P18583	Protein SON OS=Homo sapiens OX=9606 GN=SON PE=1 SV=4	2	2	7	2	263.7	SON	-0.614648	0.455976	0.686638
P16402	Histone H1.3 OS=Homo sapiens OX=9606 GN=H1-3 PE=1 SV=2	24	9	52	9	22.3	H1-3	-0.618943	0.39403	0.649548
P46439	Glutathione S-transferase Mu 5 OS=Homo sapiens OX=9606 GN=GSTM5 PE=1 SV=3	8	2	4	1	25.7	GSTM5	-0.620197	0.675766	0.823962
Q9Y3Y2	Chromatin target of PRMT1 protein OS=Homo sapiens OX=9606 GN=CHTOP PE=1 SV=2	5	1	4	1	26.4	CHTOP	-0.62081	0.526779	0.723738
O75828	Carbonyl reductase [0DPH] 3 OS=Homo sapiens OX=9606 GN=CBR3 PE=1 SV=3	13	3	7	3	30.8	CBR3	-0.622001	0.404267	0.657976
Q8NI27	THO complex subunit 2 OS=Homo sapiens OX=9606 GN=THOC2 PE=1 SV=2	1	1	1	1	182.7	THOC2	-0.631381	0.539922	0.737367
Q13200	26S proteasome non-ATPase regulatory subunit 2 OS=Homo sapiens OX=9606 GN=PSMD2 PE=1 SV=3	9	6	18	6	100.1	PSMD2	-0.632252	0.542556	0.73802
P00390	Glutathione reductase, mitochondrial OS=Homo sapiens OX=9606 GN=GSR PE=1 SV=2	4	2	6	2	56.2	GSR	-0.636797	0.58935	0.767067
P29401	Transketolase OS=Homo sapiens OX=9606 GN=TKT PE=1 SV=3	5	3	5	3	67.8	TKT	-0.636985	0.459743	0.690287
Q9GZL7	Ribosome biogenesis protein WDR12 OS=Homo sapiens OX=9606 GN=WDR12 PE=1 SV=2	2	1	1	1	47.7	WDR12	-0.639575	0.655697	0.81035
Q14145	Kelch-like ECH-associated protein 1 OS=Homo sapiens OX=9606 GN=KEAP1 PE=1 SV=2	2	1	1	1	69.6	KEAP1	-0.642355	0.472022	0.693728
Q8TC07	TBC1 domain family member 15 OS=Homo sapiens OX=9606 GN=TBC1D15 PE=1 SV=2	5	3	8	3	79.4	TBC1D15	-0.648072	0.584904	0.763346
O60832	H/ACA ribonucleoprotein complex subunit DKC1 OS=Homo sapiens OX=9606 GN=DKC1 PE=1 SV=3	6	2	2	2	57.6	DKC1	-0.648198	0.341265	0.608471
O75663	TIP41-like protein OS=Homo sapiens OX=9606 GN=TIPRL PE=1 SV=2	11	3	4	3	31.4	TIPRL	-0.650412	0.521544	0.720574
Q15746	Myosin light chain ki0se, smooth muscle OS=Homo sapiens OX=9606 GN=MYLK PE=1 SV=4	0	1	1	1	210.6	MYLK	-0.652998	0.425992	0.671002
P12645	Bone morphogenetic protein 3 OS=Homo sapiens OX=9606 GN=BMP3 PE=1 SV=2	1	1	1	1	53.3	BMP3	-0.653778	0.668631	0.820411
P05091	Aldehyde dehydroge0se, mitochondrial OS=Homo sapiens OX=9606 GN=ALDH2 PE=1 SV=2	9	4	4	4	56.3	ALDH2	-0.656646	0.584959	0.763346
P34932	Heat shock 70 kDa protein 4 OS=Homo sapiens OX=9606 GN=HSPA4 PE=1 SV=4	6	4	6	3	94.3	HSPA4	-0.657184	0.576287	0.757807
O75629	Protein CREG1 OS=Homo sapiens OX=9606 GN=CREG1 PE=1 SV=1	10	1	1	1	24.1	CREG1	-0.657515	0.604217	0.775664
P49368	T-complex protein 1 subunit gamma OS=Homo sapiens OX=9606 GN=CCT3 PE=1 SV=4	24	11	49	11	60.5	CCT3	-0.658009	0.530033	0.726761
P47756	F-actin-capping protein subunit beta OS=Homo sapiens OX=9606 GN=CAPZB PE=1 SV=5	15	4	10	4	30.6	CAPZB	-0.659825	0.479739	0.694911
P00491	Purine nucleoside phosphorylase OS=Homo sapiens OX=9606 GN=PNP PE=1 SV=2	7	2	2	2	32.1	PNP	-0.661414	0.494157	0.70781
A5YKK6	CCR4-NOT transcription complex subunit 1 OS=Homo sapiens OX=9606 GN=CNOT1 PE=1 SV=2	1	2	4	2	266.8	CNOT1	-0.667362	0.300142	0.587292
P0DP25	Calmodulin-3 OS=Homo sapiens OX=9606 GN=CALM3 PE=1 SV=1	37	5	10	5	16.8	CALM3	-0.668359	0.56823	0.753251
Q9Y244	Proteasome maturation protein OS=Homo sapiens OX=9606 GN=POMP PE=1 SV=1	11	1	3	1	15.8	POMP	-0.670906	0.509512	0.712429
Q6P1M0	Long-chain fatty acid transport protein 4 OS=Homo sapiens OX=9606 GN=SLC27A4 PE=1 SV=1	2	2	2	2	72	SLC27A4	-0.675603	0.458999	0.690179
Q9NR31	GTP-binding protein SAR1a OS=Homo sapiens OX=9606 GN=SAR1A PE=1 SV=1	16	2	5	2	22.4	SAR1A	-0.677104	0.352581	0.617793
Q13363	C-termi0l-binding protein 1 OS=Homo sapiens OX=9606 GN=CTBP1 PE=1 SV=2	8	4	7	4	47.5	CTBP1	-0.677196	0.39071	0.645111
Q99661	Kinesin-like protein KIF2C OS=Homo sapiens OX=9606 GN=KIF2C PE=1 SV=2	3	2	2	2	81.3	KIF2C	-0.677645	0.557672	0.74977
P24534	Elongation factor 1-beta OS=Homo sapiens OX=9606 GN=EEF1B2 PE=1 SV=3	16	3	8	3	24.7	EEF1B2	-0.677802	0.382149	0.642479
Q8IUR0	Trafficking protein particle complex subunit 5 OS=Homo sapiens OX=9606 GN=TRAPPC5 PE=1 SV=1	4	1	1	1	20.8	TRAPPC5	-0.68777	0.509099	0.712429
O00541	Pescadillo homolog OS=Homo sapiens OX=9606 GN=PES1 PE=1 SV=1	5	3	12	3	68	PES1	-0.688875	0.58471	0.763346
Q15058	Kinesin-like protein KIF14 OS=Homo sapiens OX=9606 GN=KIF14 PE=1 SV=1	1	2	4	2	186.4	KIF14	-0.693147	0.526976	0.723738
O00189	AP-4 complex subunit mu-1 OS=Homo sapiens OX=9606 GN=AP4M1 PE=1 SV=2	2	1	1	1	49.9	AP4M1	-0.702061	0.258195	0.559949
Q6RFH5	WD repeat-containing protein 74 OS=Homo sapiens OX=9606 GN=WDR74 PE=1 SV=1	2	1	1	1	42.4	WDR74	-0.707749	0.510122	0.712429
Q15020	Squamous cell carcinoma antigen recognized by T-cells 3 OS=Homo sapiens OX=9606 GN=SART3 PE=1 SV=1	1	1	1	1	109.9	SART3	-0.709499	0.381728	0.642479
Q9NNW5	tR0 (34-2'-O)-methyltransferase regulator WDR6 OS=Homo sapiens OX=9606 GN=WDR6 PE=1 SV=1	2	2	2	2	121.6	WDR6	-0.71177	0.314688	0.595184
P42330	Aldo-keto reductase family 1 member C3 OS=Homo sapiens OX=9606 GN=AKR1C3 PE=1 SV=4	5	2	2	2	36.8	AKR1C3	-0.714103	0.694367	0.835029
P84085	ADP-ribosylation factor 5 OS=Homo sapiens OX=9606 GN=ARF5 PE=1 SV=2	40	5	17	1	20.5	ARF5	-0.714205	0.291737	0.584619
Q14315	Filamin-C OS=Homo sapiens OX=9606 GN=FLNC PE=1 SV=3	2	3	11	1	290.8	FLNC	-0.715075	0.64892	0.806829
Q09161	Nuclear cap-binding protein subunit 1 OS=Homo sapiens OX=9606 GN=NCBP1 PE=1 SV=1	1	1	3	1	91.8	NCBP1	-0.715697	0.622573	0.78992
P62140	Serine/threonine-protein phosphatase PP1-beta catalytic subunit OS=Homo sapiens OX=9606 GN=PPP1CB PE=1 SV=3	12	3	5	1	37.2	PPP1CB	-0.716207	0.0914902	0.375842
Q12769	Nuclear pore complex protein Nup160 OS=Homo sapiens OX=9606 GN=NUP160 PE=1 SV=3	1	1	1	1	162	NUP160	-0.722663	0.321517	0.598195
P84098	Large ribosomal subunit protein eL19 OS=Homo sapiens OX=9606 GN=RPL19 PE=1 SV=1	22	4	25	4	23.5	RPL19	-0.723049	0.583081	0.763346
Q99729	Heterogeneous nuclear ribonucleoprotein A/B OS=Homo sapiens OX=9606 GN=HNRNPAB PE=1 SV=2	12	4	13	3	36.2	HNRNPAB	-0.736599	0.527124	0.723738
P46781	Small ribosomal subunit protein uS4 OS=Homo sapiens OX=9606 GN=RPS9 PE=1 SV=3	58	18	164	18	22.6	RPS9	-0.739338	0.416334	0.664969
Q9UHI6	Probable ATP-dependent R0 helicase DDX20 OS=Homo sapiens OX=9606 GN=DDX20 PE=1 SV=2	2	1	3	1	92.2	DDX20	-0.741076	0.461742	0.690867
O75694	Nuclear pore complex protein Nup155 OS=Homo sapiens OX=9606 GN=NUP155 PE=1 SV=1	1	1	1	1	155.1	NUP155	-0.741786	0.627168	0.791531
P39023	Large ribosomal subunit protein uL3 OS=Homo sapiens OX=9606 GN=RPL3 PE=1 SV=2	41	17	77	17	46.1	RPL3	-0.743752	0.442635	0.678049
P25686	D0J homolog subfamily B member 2 OS=Homo sapiens OX=9606 GN=D0JB2 PE=1 SV=3	9	3	7	2	35.6	D0JB2	-0.74535	0.486476	0.699736
P43243	Matrin-3 OS=Homo sapiens OX=9606 GN=MATR3 PE=1 SV=2	30	20	158	20	94.6	MATR3	-0.750436	0.453245	0.686638
O43663	Protein regulator of cytokinesis 1 OS=Homo sapiens OX=9606 GN=PRC1 PE=1 SV=2	1	1	1	1	71.6	PRC1	-0.757894	0.531943	0.727855
Q9UNQ2	Probable dimethyladenosine transferase OS=Homo sapiens OX=9606 GN=DIMT1 PE=1 SV=1	10	3	6	3	35.2	DIMT1	-0.764698	0.532249	0.727855
P11021	Endoplasmic reticulum chaperone BiP OS=Homo sapiens OX=9606 GN=HSPA5 PE=1 SV=2	34	20	120	18	72.3	HSPA5	-0.765257	0.371953	0.63251
Q8TED0	U3 small nucleolar R0-associated protein 15 homolog OS=Homo sapiens OX=9606 GN=UTP15 PE=1 SV=3	2	1	4	1	58.4	UTP15	-0.766291	0.562274	0.752542
P12273	Prolactin-inducible protein OS=Homo sapiens OX=9606 GN=PIP PE=1 SV=1	49	5	34	5	16.6	PIP	-0.766345	0.301934	0.587292
Q9NTJ3	Structural mainte0nce of chromosomes protein 4 OS=Homo sapiens OX=9606 GN=SMC4 PE=1 SV=2	1	1	3	1	147.1	SMC4	-0.774472	0.501346	0.708701
P42704	Leucine-rich PPR motif-containing protein, mitochondrial OS=Homo sapiens OX=9606 GN=LRPPRC PE=1 SV=3	2	3	9	3	157.8	LRPPRC	-0.774899	0.570623	0.753251
P37802	Transgelin-2 OS=Homo sapiens OX=9606 GN=TAGLN2 PE=1 SV=3	23	4	7	4	22.4	TAGLN2	-0.775331	0.383486	0.642479
P62244	Small ribosomal subunit protein uS8 OS=Homo sapiens OX=9606 GN=RPS15A PE=1 SV=2	44	6	43	6	14.8	RPS15A	-0.775648	0.352775	0.617793
Q9H3U1	Protein unc-45 homolog A OS=Homo sapiens OX=9606 GN=UNC45A PE=1 SV=1	1	1	1	1	103	UNC45A	-0.786008	0.324711	0.598195
P46060	Ran GTPase-activating protein 1 OS=Homo sapiens OX=9606 GN=RANGAP1 PE=1 SV=1	4	2	5	2	63.5	RANGAP1	-0.788457	0.514465	0.714961
Q9NP55	BPI fold-containing family A member 1 OS=Homo sapiens OX=9606 GN=BPIFA1 PE=1 SV=1	27	5	28	5	26.7	BPIFA1	-0.789329	0.300905	0.587292
P18669	Phosphoglycerate mutase 1 OS=Homo sapiens OX=9606 GN=PGAM1 PE=1 SV=2	4	1	1	1	28.8	PGAM1	-0.79908	0.568183	0.753251
P61224	Ras-related protein Rap-1b OS=Homo sapiens OX=9606 GN=RAP1B PE=1 SV=1	6	1	1	1	20.8	RAP1B	-0.79983	0.30399	0.587292
A6NIH7	Protein unc-119 homolog B OS=Homo sapiens OX=9606 GN=UNC119B PE=1 SV=1	4	1	1	1	28.1	UNC119B	-0.805213	0.562897	0.752542
P36957	Dihydrolipoyllysine-residue succinyltransferase component of 2-oxoglutarate dehydroge0se complex, mitochondrial OS=Homo sapiens OX=9606 GN=DLST PE=1 SV=4	8	3	5	3	48.7	DLST	-0.807723	0.275474	0.568833
P12814	Alpha-actinin-1 OS=Homo sapiens OX=9606 GN=ACTN1 PE=1 SV=2	4	3	12	3	103	ACTN1	-0.808303	0.498353	0.708701
O95782	AP-2 complex subunit alpha-1 OS=Homo sapiens OX=9606 GN=AP2A1 PE=1 SV=3	2	2	3	2	107.5	AP2A1	-0.816691	0.39945	0.652203
P07195	L-lactate dehydroge0se B chain OS=Homo sapiens OX=9606 GN=LDHB PE=1 SV=2	32	10	59	9	36.6	LDHB	-0.819204	0.508168	0.712429
Q16763	Ubiquitin-conjugating enzyme E2 S OS=Homo sapiens OX=9606 GN=UBE2S PE=1 SV=2	12	2	2	2	23.8	UBE2S	-0.819633	0.477133	0.694243
Q8N5S1	Mitochondrial carrier protein SCaMC-3L OS=Homo sapiens OX=9606 GN=SLC25A41 PE=2 SV=2	4	1	1	1	40.8	SLC25A41	-0.825616	0.294919	0.58698
O75306	0DH dehydroge0se [ubiquinone] iron-sulfur protein 2, mitochondrial OS=Homo sapiens OX=9606 GN=NDUFS2 PE=1 SV=2	4	2	6	2	52.5	NDUFS2	-0.82944	0.253016	0.559949
Q9BSJ8	Extended sy0ptotagmin-1 OS=Homo sapiens OX=9606 GN=ESYT1 PE=1 SV=1	3	2	2	2	122.8	ESYT1	-0.83412	0.165158	0.48525
Q9H7B2	Ribosome production factor 2 homolog OS=Homo sapiens OX=9606 GN=RPF2 PE=1 SV=2	5	2	13	2	35.6	RPF2	-0.83417	0.412855	0.662503
P48200	Iron-responsive element-binding protein 2 OS=Homo sapiens OX=9606 GN=IREB2 PE=1 SV=4	1	1	1	1	105	IREB2	-0.834588	0.595607	0.769916
Q8WWM7	Ataxin-2-like protein OS=Homo sapiens OX=9606 GN=ATXN2L PE=1 SV=2	3	3	3	3	113.3	ATXN2L	-0.835262	0.24623	0.554136
P19387	D0-directed R0 polymerase II subunit RPB3 OS=Homo sapiens OX=9606 GN=POLR2C PE=1 SV=2	14	3	6	3	31.4	POLR2C	-0.836756	0.294345	0.586976
O76021	Ribosomal L1 domain-containing protein 1 OS=Homo sapiens OX=9606 GN=RSL1D1 PE=1 SV=3	11	8	29	8	54.9	RSL1D1	-0.841364	0.549007	0.742859
P61247	Small ribosomal subunit protein eS1 OS=Homo sapiens OX=9606 GN=RPS3A PE=1 SV=2	55	16	81	16	29.9	RPS3A	-0.842765	0.362605	0.63011
Q92841	Probable ATP-dependent R0 helicase DDX17 OS=Homo sapiens OX=9606 GN=DDX17 PE=1 SV=2	27	18	128	10	80.2	DDX17	-0.843089	0.37176	0.63251
Q7Z4H7	HAUS augmin-like complex subunit 6 OS=Homo sapiens OX=9606 GN=HAUS6 PE=1 SV=2	8	6	9	6	108.6	HAUS6	-0.847391	0.613706	0.782951
P55060	Exportin-2 OS=Homo sapiens OX=9606 GN=CSE1L PE=1 SV=3	3	3	7	3	110.3	CSE1L	-0.848697	0.583111	0.763346
Q9NSI2	Ribosome biogenesis protein SLX9 homolog OS=Homo sapiens OX=9606 GN=SLX9 PE=1 SV=2	5	1	1	1	25.4	SLX9	-0.858583	0.396247	0.65215
Q1KMD3	Heterogeneous nuclear ribonucleoprotein U-like protein 2 OS=Homo sapiens OX=9606 GN=HNRNPUL2 PE=1 SV=1	2	2	6	2	85.1	HNRNPUL2	-0.858957	0.436293	0.673786
O14925	Mitochondrial import inner membrane translocase subunit Tim23 OS=Homo sapiens OX=9606 GN=TIMM23 PE=1 SV=1	5	1	4	1	21.9	TIMM23	-0.860007	0.18013	0.486664
Q99714	3-hydroxyacyl-CoA dehydroge0se type-2 OS=Homo sapiens OX=9606 GN=HSD17B10 PE=1 SV=3	23	4	14	4	26.9	HSD17B10	-0.862194	0.477136	0.694243
P62805	Histone H4 OS=Homo sapiens OX=9606 GN=H4C1 PE=1 SV=2	59	16	317	16	11.4	H4C1; H4C11; H4C12; H4C13; H4C14; H4C15; H4C16; H4C2; H4C3; H4C4; H4C5; H4C6; H4C8; H4C9	-0.862568	0.425267	0.67089
P49721	Proteasome subunit beta type-2 OS=Homo sapiens OX=9606 GN=PSMB2 PE=1 SV=1	10	2	9	2	22.8	PSMB2	-0.862658	0.21346	0.511971
P23490	Loricrin OS=Homo sapiens OX=9606 GN=LORICRIN PE=1 SV=2	4	1	2	1	25.7	LORICRIN	-0.863568	0.433422	0.673435
P63244	Small ribosomal subunit protein RACK1 OS=Homo sapiens OX=9606 GN=RACK1 PE=1 SV=3	30	11	49	11	35.1	RACK1	-0.864587	0.299662	0.587292
G2XKQ0	Small ubiquitin-related modifier 5 OS=Homo sapiens OX=9606 GN=SUMO1P1 PE=1 SV=2	7	1	3	1	11.5	SUMO1P1	-0.866449	0.49856	0.708701
Q16762	Thiosulfate sulfurtransferase OS=Homo sapiens OX=9606 GN=TST PE=1 SV=4	6	2	2	2	33.4	TST	-0.867694	0.522013	0.720574
Q9BSU1	Phagosome assembly factor 1 OS=Homo sapiens OX=9606 GN=PHAF1 PE=1 SV=1	2	1	2	1	47.5	PHAF1	-0.868038	0.478873	0.694637
P56556	0DH dehydroge0se [ubiquinone] 1 alpha subcomplex subunit 6 OS=Homo sapiens OX=9606 GN=NDUFA6 PE=1 SV=4	6	1	1	1	15.1	NDUFA6	-0.872008	0.440005	0.675463
P26599	Polypyrimidine tract-binding protein 1 OS=Homo sapiens OX=9606 GN=PTBP1 PE=1 SV=2	26	11	96	11	59.6	PTBP1	-0.875474	0.255675	0.559949
Q9Y399	Small ribosomal subunit protein uS2m OS=Homo sapiens OX=9606 GN=MRPS2 PE=1 SV=1	3	1	5	1	33.2	MRPS2	-0.883676	0.413574	0.662621
P07384	Calpain-1 catalytic subunit OS=Homo sapiens OX=9606 GN=CAPN1 PE=1 SV=1	1	1	1	1	81.8	CAPN1	-0.884419	0.14648	0.459542
P31948	Stress-induced-phosphoprotein 1 OS=Homo sapiens OX=9606 GN=STIP1 PE=1 SV=1	2	1	2	1	62.6	STIP1	-0.884433	0.220875	0.51908
Q14244	Ensconsin OS=Homo sapiens OX=9606 GN=MAP7 PE=1 SV=1	1	1	5	1	84	MAP7	-0.893306	0.420964	0.668207
O75223	Gamma-glutamylcyclotransferase OS=Homo sapiens OX=9606 GN=GGCT PE=1 SV=1	10	2	3	2	21	GGCT	-0.897165	0.207443	0.507246
Q16610	Extracellular matrix protein 1 OS=Homo sapiens OX=9606 GN=ECM1 PE=1 SV=2	2	1	4	1	60.6	ECM1	-0.897171	0.334199	0.605331
Q9P000	COMM domain-containing protein 9 OS=Homo sapiens OX=9606 GN=COMMD9 PE=1 SV=2	14	2	4	2	21.8	COMMD9	-0.900082	0.011521	0.175259
O95503	Chromobox protein homolog 6 OS=Homo sapiens OX=9606 GN=CBX6 PE=1 SV=1	2	1	4	1	43.9	CBX6	-0.903746	0.367202	0.630629
Q14749	Glycine N-methyltransferase OS=Homo sapiens OX=9606 GN=GNMT PE=1 SV=3	9	2	2	2	32.7	GNMT	-0.905511	0.464831	0.691856
Q9Y617	Phosphoserine aminotransferase OS=Homo sapiens OX=9606 GN=PSAT1 PE=1 SV=2	5	2	4	2	40.4	PSAT1	-0.907803	0.491993	0.706575
P06737	Glycogen phosphorylase, liver form OS=Homo sapiens OX=9606 GN=PYGL PE=1 SV=4	1	1	2	1	97.1	PYGL	-0.91025	0.594558	0.769916
Q13547	Histone deacetylase 1 OS=Homo sapiens OX=9606 GN=HDAC1 PE=1 SV=1	13	5	17	2	55.1	HDAC1	-0.915141	0.484522	0.698882
Q14839	Chromodomain-helicase-D0-binding protein 4 OS=Homo sapiens OX=9606 GN=CHD4 PE=1 SV=2	0	1	2	1	217.9	CHD4	-0.91518	0.353111	0.617793
O43396	Thioredoxin-like protein 1 OS=Homo sapiens OX=9606 GN=TXNL1 PE=1 SV=3	2	1	1	1	32.2	TXNL1	-0.916584	0.2405	0.545239
P53634	Dipeptidyl peptidase 1 OS=Homo sapiens OX=9606 GN=CTSC PE=1 SV=2	3	1	1	1	51.8	CTSC	-0.917891	0.455513	0.686638
P55084	Trifunctio0l enzyme subunit beta, mitochondrial OS=Homo sapiens OX=9606 GN=HADHB PE=1 SV=3	4	2	5	2	51.3	HADHB	-0.921321	0.444162	0.678802
P35573	Glycogen debranching enzyme OS=Homo sapiens OX=9606 GN=AGL PE=1 SV=3	3	4	9	4	174.7	AGL	-0.921576	0.18319	0.486664
Q969X6	U3 small nucleolar R0-associated protein 4 homolog OS=Homo sapiens OX=9606 GN=UTP4 PE=1 SV=1	3	2	2	2	76.8	UTP4	-0.927765	0.267171	0.561114
P62277	Small ribosomal subunit protein uS15 OS=Homo sapiens OX=9606 GN=RPS13 PE=1 SV=2	53	9	56	9	17.2	RPS13	-0.931045	0.281767	0.573724
P0DOX6	Immunoglobulin mu heavy chain OS=Homo sapiens OX=9606 PE=1 SV=2	1	1	1	1	63.4	0	-0.932578	0.224278	0.523486
Q15459	Splicing factor 3A subunit 1 OS=Homo sapiens OX=9606 GN=SF3A1 PE=1 SV=1	2	2	4	2	88.8	SF3A1	-0.936254	0.60761	0.778074
P00505	Aspartate aminotransferase, mitochondrial OS=Homo sapiens OX=9606 GN=GOT2 PE=1 SV=3	10	4	7	4	47.5	GOT2	-0.938989	0.435886	0.673786
P14550	Aldo-keto reductase family 1 member A1 OS=Homo sapiens OX=9606 GN=AKR1A1 PE=1 SV=3	7	2	2	2	36.6	AKR1A1	-0.940881	0.388052	0.644073
Q96B26	Exosome complex component RRP43 OS=Homo sapiens OX=9606 GN=EXOSC8 PE=1 SV=1	10	2	5	2	30	EXOSC8	-0.94145	0.336545	0.607803
P62714	Serine/threonine-protein phosphatase 2A catalytic subunit beta isoform OS=Homo sapiens OX=9606 GN=PPP2CB PE=1 SV=1	6	2	5	2	35.6	PPP2CB	-0.944896	0.324886	0.598195
Q8TDL5	BPI fold-containing family B member 1 OS=Homo sapiens OX=9606 GN=BPIFB1 PE=1 SV=1	28	12	39	12	52.4	BPIFB1	-0.946281	0.408801	0.659882
O15357	Phosphatidylinositol 3,4,5-trisphosphate 5-phosphatase 2 OS=Homo sapiens OX=9606 GN=INPPL1 PE=1 SV=2	1	1	2	1	138.5	INPPL1	-0.949238	0.409937	0.659882
Q9BXW7	Haloacid dehaloge0se-like hydrolase domain-containing 5 OS=Homo sapiens OX=9606 GN=HDHD5 PE=1 SV=1	2	1	1	1	46.3	HDHD5	-0.950871	0.468698	0.693728
Q99575	Ribonucleases P/MRP protein subunit POP1 OS=Homo sapiens OX=9606 GN=POP1 PE=1 SV=2	1	1	2	1	114.6	POP1	-0.950952	0.352711	0.617793
P59998	Actin-related protein 2/3 complex subunit 4 OS=Homo sapiens OX=9606 GN=ARPC4 PE=1 SV=3	10	2	4	2	19.7	ARPC4	-0.952071	0.473679	0.694243
P18621	Large ribosomal subunit protein uL22 OS=Homo sapiens OX=9606 GN=RPL17 PE=1 SV=3	37	7	28	7	21.4	RPL17	-0.953456	0.449952	0.685582
Q15181	Inorganic pyrophosphatase OS=Homo sapiens OX=9606 GN=PPA1 PE=1 SV=2	11	2	3	2	32.6	PPA1	-0.954696	0.181748	0.486664
Q9Y5S9	R0-binding protein 8A OS=Homo sapiens OX=9606 GN=RBM8A PE=1 SV=1	22	4	10	4	19.9	RBM8A	-0.96057	0.224191	0.523486
P17174	Aspartate aminotransferase, cytoplasmic OS=Homo sapiens OX=9606 GN=GOT1 PE=1 SV=3	6	3	3	3	46.2	GOT1	-0.961899	0.13366	0.443689
Q92499	ATP-dependent R0 helicase DDX1 OS=Homo sapiens OX=9606 GN=DDX1 PE=1 SV=2	10	5	6	5	82.4	DDX1	-0.964274	0.406141	0.658937
O15269	Serine palmitoyltransferase 1 OS=Homo sapiens OX=9606 GN=SPTLC1 PE=1 SV=1	3	1	4	1	52.7	SPTLC1	-0.966368	0.196479	0.500705
Q9BWH6	R0 polymerase II-associated protein 1 OS=Homo sapiens OX=9606 GN=RPAP1 PE=1 SV=3	1	1	1	1	152.7	RPAP1	-0.971256	0.47729	0.694243
Q07812	Apoptosis regulator BAX OS=Homo sapiens OX=9606 GN=BAX PE=1 SV=1	7	1	3	1	21.2	BAX	-0.975481	0.159861	0.479452
P30044	Peroxiredoxin-5, mitochondrial OS=Homo sapiens OX=9606 GN=PRDX5 PE=1 SV=4	5	1	1	1	22.1	PRDX5	-0.977592	0.218636	0.516057
Q9Y383	Putative R0-binding protein Luc7-like 2 OS=Homo sapiens OX=9606 GN=LUC7L2 PE=1 SV=2	8	3	4	3	46.5	LUC7L2	-0.977929	0.184335	0.486664
Q9P258	Protein RCC2 OS=Homo sapiens OX=9606 GN=RCC2 PE=1 SV=2	6	3	9	3	56	RCC2	-0.982101	0.174606	0.486664
Q9BT25	HAUS augmin-like complex subunit 8 OS=Homo sapiens OX=9606 GN=HAUS8 PE=1 SV=3	13	2	3	2	44.8	HAUS8	-0.985135	0.365625	0.630629
P29692	Elongation factor 1-delta OS=Homo sapiens OX=9606 GN=EEF1D PE=1 SV=5	20	4	16	4	31.1	EEF1D	-0.987421	0.462501	0.690867
Q4G0F5	Vacuolar protein sorting-associated protein 26B OS=Homo sapiens OX=9606 GN=VPS26B PE=1 SV=2	3	1	1	1	39.1	VPS26B	-0.989369	0.216426	0.512479
Q6E0U4	Dermokine OS=Homo sapiens OX=9606 GN=DMKN PE=1 SV=3	4	1	1	1	47.1	DMKN	-0.99126	0.337953	0.607803
P26641	Elongation factor 1-gamma OS=Homo sapiens OX=9606 GN=EEF1G PE=1 SV=3	22	10	62	10	50.1	EEF1G	-0.991326	0.420018	0.667738
P08922	Proto-oncogene tyrosine-protein ki0se ROS OS=Homo sapiens OX=9606 GN=ROS1 PE=1 SV=3	0	1	2	1	263.7	ROS1	-0.991372	0.338076	0.607803
P10515	Dihydrolipoyllysine-residue acetyltransferase component of pyruvate dehydroge0se complex, mitochondrial OS=Homo sapiens OX=9606 GN=DLAT PE=1 SV=3	6	4	6	4	69	DLAT	-0.991473	0.405859	0.658937
P30613	Pyruvate ki0se PKLR OS=Homo sapiens OX=9606 GN=PKLR PE=1 SV=2	4	2	12	1	61.8	PKLR	-0.993048	0.199663	0.501355
P40937	Replication factor C subunit 5 OS=Homo sapiens OX=9606 GN=RFC5 PE=1 SV=1	13	4	5	4	38.5	RFC5	-0.994384	0.3671	0.630629
P28074	Proteasome subunit beta type-5 OS=Homo sapiens OX=9606 GN=PSMB5 PE=1 SV=3	19	4	9	4	28.5	PSMB5	-0.998835	0.436944	0.673786
P40925	Malate dehydroge0se, cytoplasmic OS=Homo sapiens OX=9606 GN=MDH1 PE=1 SV=4	7	2	2	2	36.4	MDH1	-1.00092	0.433824	0.673435
Q9P0J0	0DH dehydroge0se [ubiquinone] 1 alpha subcomplex subunit 13 OS=Homo sapiens OX=9606 GN=NDUFA13 PE=1 SV=3	19	2	5	2	16.7	NDUFA13	-1.00138	0.29622	0.587088
P35237	Serpin B6 OS=Homo sapiens OX=9606 GN=SERPINB6 PE=1 SV=3	2	1	1	1	42.6	SERPINB6	-1.00184	0.45459	0.686638
P82930	Small ribosomal subunit protein mS34 OS=Homo sapiens OX=9606 GN=MRPS34 PE=1 SV=2	17	4	18	4	25.6	MRPS34	-1.00657	0.37992	0.64174
P22307	Sterol carrier protein 2 OS=Homo sapiens OX=9606 GN=SCP2 PE=1 SV=2	1	1	2	1	59	SCP2	-1.00746	0.302491	0.587292
P38432	Coilin OS=Homo sapiens OX=9606 GN=COIL PE=1 SV=1	2	1	2	1	62.6	COIL	-1.00796	0.33897	0.607803
O60264	SWI/SNF-related matrix-associated actin-dependent regulator of chromatin subfamily A member 5 OS=Homo sapiens OX=9606 GN=SMARCA5 PE=1 SV=1	8	10	19	10	121.8	SMARCA5	-1.00822	0.612506	0.782951
Q9NRN7	L-aminoadipate-semialdehyde dehydroge0se-phosphopantetheinyl transferase OS=Homo sapiens OX=9606 GN=AASDHPPT PE=1 SV=2	5	1	1	1	35.8	AASDHPPT	-1.01365	0.172967	0.486664
O95433	Activator of 90 kDa heat shock protein ATPase homolog 1 OS=Homo sapiens OX=9606 GN=AHSA1 PE=1 SV=1	11	3	12	3	38.3	AHSA1	-1.01683	0.50084	0.708701
Q13573	SNW domain-containing protein 1 OS=Homo sapiens OX=9606 GN=SNW1 PE=1 SV=1	1	1	1	1	61.5	SNW1	-1.02113	0.323981	0.598195
O00567	Nucleolar protein 56 OS=Homo sapiens OX=9606 GN=NOP56 PE=1 SV=4	21	10	36	10	66	NOP56	-1.02424	0.351779	0.617793
P01591	Immunoglobulin J chain OS=Homo sapiens OX=9606 GN=JCHAIN PE=1 SV=4	23	4	23	4	18.1	JCHAIN	-1.02734	0.598282	0.769916
P78318	Immunoglobulin-binding protein 1 OS=Homo sapiens OX=9606 GN=IGBP1 PE=1 SV=1	3	1	2	1	39.2	IGBP1	-1.02866	0.430425	0.673435
P04083	Annexin A1 OS=Homo sapiens OX=9606 GN=ANXA1 PE=1 SV=2	6	2	2	2	38.7	ANXA1	-1.03224	0.258913	0.559949
P55265	Double-stranded R0-specific adenosine deami0se OS=Homo sapiens OX=9606 GN=ADAR PE=1 SV=4	4	4	8	4	136	ADAR	-1.03429	0.340299	0.607803
Q12788	Transducin beta-like protein 3 OS=Homo sapiens OX=9606 GN=TBL3 PE=1 SV=2	2	1	1	1	89	TBL3	-1.03443	0.476927	0.694243
Q99829	Copine-1 OS=Homo sapiens OX=9606 GN=CPNE1 PE=1 SV=1	6	3	4	3	59	CPNE1	-1.03674	0.157963	0.477141
Q8IY81	pre-rR0 2'-O-ribose R0 methyltransferase FTSJ3 OS=Homo sapiens OX=9606 GN=FTSJ3 PE=1 SV=2	2	2	9	2	96.5	FTSJ3	-1.0374	0.446742	0.681729
Q8WVX9	Fatty acyl-CoA reductase 1 OS=Homo sapiens OX=9606 GN=FAR1 PE=1 SV=1	5	3	6	3	59.3	FAR1	-1.03743	0.411735	0.66174
P01877	Immunoglobulin heavy constant alpha 2 OS=Homo sapiens OX=9606 GN=IGHA2 PE=1 SV=5	22	8	37	2	42.3	IGHA2	-1.03961	0.626668	0.791531
P0C0L4	Complement C4-A OS=Homo sapiens OX=9606 GN=C4A PE=1 SV=2	2	2	6	2	192.7	C4A	-1.04325	0.469907	0.693728
O75817	Ribonuclease P protein subunit p20 OS=Homo sapiens OX=9606 GN=POP7 PE=1 SV=2	6	1	1	1	15.6	POP7	-1.04453	0.379499	0.64174
Q96A72	Protein mago 0shi homolog 2 OS=Homo sapiens OX=9606 GN=MAGOHB PE=1 SV=1	7	1	2	1	17.3	MAGOHB	-1.04487	0.454688	0.686638
Q9UL46	Proteasome activator complex subunit 2 OS=Homo sapiens OX=9606 GN=PSME2 PE=1 SV=4	3	1	1	1	27.4	PSME2	-1.04512	0.496807	0.708701
P17844	Probable ATP-dependent R0 helicase DDX5 OS=Homo sapiens OX=9606 GN=DDX5 PE=1 SV=1	36	22	139	14	69.1	DDX5	-1.0542	0.569042	0.753251
Q01813	ATP-dependent 6-phosphofructoki0se, platelet type OS=Homo sapiens OX=9606 GN=PFKP PE=1 SV=2	1	1	2	1	85.5	PFKP	-1.05978	0.547247	0.741455
Q15717	ELAV-like protein 1 OS=Homo sapiens OX=9606 GN=ELAVL1 PE=1 SV=2	25	7	30	7	36.1	ELAVL1	-1.06305	0.337761	0.607803
Q9H2G2	STE20-like serine/threonine-protein ki0se OS=Homo sapiens OX=9606 GN=SLK PE=1 SV=1	1	1	2	1	142.6	SLK	-1.06685	0.326308	0.598195
O43617	Trafficking protein particle complex subunit 3 OS=Homo sapiens OX=9606 GN=TRAPPC3 PE=1 SV=1	4	1	2	1	20.3	TRAPPC3	-1.06717	0.317362	0.595427
Q03252	Lamin-B2 OS=Homo sapiens OX=9606 GN=LMNB2 PE=1 SV=4	9	6	10	2	69.9	LMNB2	-1.06782	0.443009	0.678049
P17987	T-complex protein 1 subunit alpha OS=Homo sapiens OX=9606 GN=TCP1 PE=1 SV=1	31	14	75	14	60.3	TCP1	-1.06783	0.165741	0.48525
Q9NR30	Nucleolar R0 helicase 2 OS=Homo sapiens OX=9606 GN=DDX21 PE=1 SV=5	28	19	115	17	87.3	DDX21	-1.06965	0.203738	0.504231
Q9NVH1	D0J homolog subfamily C member 11 OS=Homo sapiens OX=9606 GN=D0JC11 PE=1 SV=2	1	1	1	1	63.2	D0JC11	-1.07002	0.0764224	0.350958
O15294	UDP-N-acetylglucosamine--peptide N-acetylglucosaminyltransferase 110 kDa subunit OS=Homo sapiens OX=9606 GN=OGT PE=1 SV=3	4	3	4	3	116.9	OGT	-1.07259	0.408201	0.659882
Q9NY12	H/ACA ribonucleoprotein complex subunit 1 OS=Homo sapiens OX=9606 GN=GAR1 PE=1 SV=1	7	2	2	2	22.3	GAR1	-1.07267	0.454265	0.686638
Q9NZI8	Insulin-like growth factor 2 mR0-binding protein 1 OS=Homo sapiens OX=9606 GN=IGF2BP1 PE=1 SV=2	29	14	47	12	63.4	IGF2BP1	-1.07332	0.356983	0.623505
Q7Z7K6	Centromere protein V OS=Homo sapiens OX=9606 GN=CENPV PE=1 SV=1	8	2	11	2	29.9	CENPV	-1.08139	0.201631	0.503833
P54819	Adenylate ki0se 2, mitochondrial OS=Homo sapiens OX=9606 GN=AK2 PE=1 SV=2	11	2	2	2	26.5	AK2	-1.08345	0.278541	0.570982
P01876	Immunoglobulin heavy constant alpha 1 OS=Homo sapiens OX=9606 GN=IGHA1 PE=1 SV=3	29	11	81	5	42.8	IGHA1	-1.08905	0.572544	0.75385
P62913	Large ribosomal subunit protein uL5 OS=Homo sapiens OX=9606 GN=RPL11 PE=1 SV=2	26	6	38	6	20.2	RPL11	-1.08955	0.270223	0.561799
P07738	Bisphosphoglycerate mutase OS=Homo sapiens OX=9606 GN=BPGM PE=1 SV=2	8	2	2	2	30	BPGM	-1.09315	0.438666	0.675428
Q70IA6	MOB ki0se activator 2 OS=Homo sapiens OX=9606 GN=MOB2 PE=1 SV=1	8	2	7	2	26.9	MOB2	-1.09359	0.496407	0.708701
P62195	26S proteasome regulatory subunit 8 OS=Homo sapiens OX=9606 GN=PSMC5 PE=1 SV=1	16	5	14	5	45.6	PSMC5	-1.10173	0.363751	0.630593
P40926	Malate dehydroge0se, mitochondrial OS=Homo sapiens OX=9606 GN=MDH2 PE=1 SV=3	9	3	4	3	35.5	MDH2	-1.10175	0.476721	0.694243
Q53GQ0	Very-long-chain 3-oxoacyl-CoA reductase OS=Homo sapiens OX=9606 GN=HSD17B12 PE=1 SV=2	6	2	4	2	34.3	HSD17B12	-1.10804	0.174682	0.486664
P19823	Inter-alpha-trypsin inhibitor heavy chain H2 OS=Homo sapiens OX=9606 GN=ITIH2 PE=1 SV=2	2	1	1	1	106.4	ITIH2	-1.10828	0.434094	0.673435
Q5T4S7	E3 ubiquitin-protein ligase UBR4 OS=Homo sapiens OX=9606 GN=UBR4 PE=1 SV=1	0	2	2	2	573.5	UBR4	-1.11252	0.314083	0.595136
P55786	Puromycin-sensitive aminopeptidase OS=Homo sapiens OX=9606 GN=NPEPPS PE=1 SV=2	4	3	7	3	103.2	NPEPPS	-1.11454	0.358954	0.625884
P52565	Rho GDP-dissociation inhibitor 1 OS=Homo sapiens OX=9606 GN=ARHGDIA PE=1 SV=3	22	3	4	3	23.2	ARHGDIA	-1.11489	0.188417	0.491187
Q5JXB2	Putative ubiquitin-conjugating enzyme E2 N-like OS=Homo sapiens OX=9606 GN=UBE2NL PE=1 SV=1	7	1	1	1	17.4	UBE2NL	-1.11614	0.544231	0.738343
P49321	Nuclear autoantigenic sperm protein OS=Homo sapiens OX=9606 GN=0SP PE=1 SV=2	3	3	8	3	85.2	0SP	-1.1183	0.388452	0.644073
B9A064	Immunoglobulin lambda-like polypeptide 5 OS=Homo sapiens OX=9606 GN=IGLL5 PE=1 SV=2	11	2	6	1	23	IGLL5	-1.11962	0.30422	0.587292
Q9Y2L1	Exosome complex exonuclease RRP44 OS=Homo sapiens OX=9606 GN=DIS3 PE=1 SV=2	4	3	6	3	108.9	DIS3	-1.1222	0.43348	0.673435
Q5W0B1	ORC ubiquitin ligase 1 OS=Homo sapiens OX=9606 GN=OBI1 PE=1 SV=1	1	1	2	1	81.1	OBI1	-1.1238	0.328512	0.598195
P61289	Proteasome activator complex subunit 3 OS=Homo sapiens OX=9606 GN=PSME3 PE=1 SV=1	3	1	4	1	29.5	PSME3	-1.13005	0.263169	0.561114
Q86X55	Histone-arginine methyltransferase CARM1 OS=Homo sapiens OX=9606 GN=CARM1 PE=1 SV=3	5	3	6	3	65.8	CARM1	-1.13106	0.184929	0.48698
A0A0A0MS14	Immunoglobulin heavy variable 1-45 OS=Homo sapiens OX=9606 GN=IGHV1-45 PE=3 SV=1	9	1	11	1	13.5	IGHV1-45	-1.13308	0.209669	0.507893
O15511	Actin-related protein 2/3 complex subunit 5 OS=Homo sapiens OX=9606 GN=ARPC5 PE=1 SV=3	8	1	2	1	16.3	ARPC5	-1.13371	0.513954	0.714961
Q9UHX1	Poly(U)-binding-splicing factor PUF60 OS=Homo sapiens OX=9606 GN=PUF60 PE=1 SV=1	7	3	5	3	59.8	PUF60	-1.13405	0.252623	0.559949
O00410	Importin-5 OS=Homo sapiens OX=9606 GN=IPO5 PE=1 SV=4	4	4	10	4	123.6	IPO5	-1.13484	0.426709	0.671103
Q8NI36	WD repeat-containing protein 36 OS=Homo sapiens OX=9606 GN=WDR36 PE=1 SV=1	3	3	9	3	105.3	WDR36	-1.13507	0.203391	0.504231
P17980	26S proteasome regulatory subunit 6A OS=Homo sapiens OX=9606 GN=PSMC3 PE=1 SV=3	9	3	9	3	49.2	PSMC3	-1.13966	0.0791541	0.354984
P62273	Small ribosomal subunit protein uS14 OS=Homo sapiens OX=9606 GN=RPS29 PE=1 SV=2	14	1	1	1	6.7	RPS29	-1.13973	0.315355	0.595348
O15042	U2 snRNP-associated SURP motif-containing protein OS=Homo sapiens OX=9606 GN=U2SURP PE=1 SV=2	3	4	4	4	118.2	U2SURP	-1.15663	0.297716	0.587088
Q9UJV9	Probable ATP-dependent R0 helicase DDX41 OS=Homo sapiens OX=9606 GN=DDX41 PE=1 SV=2	5	3	4	3	69.8	DDX41	-1.1601	0.470934	0.693728
O00231	26S proteasome non-ATPase regulatory subunit 11 OS=Homo sapiens OX=9606 GN=PSMD11 PE=1 SV=3	18	7	19	7	47.4	PSMD11	-1.16075	0.216428	0.512479
O43143	ATP-dependent R0 helicase DHX15 OS=Homo sapiens OX=9606 GN=DHX15 PE=1 SV=2	19	15	89	15	90.9	DHX15	-1.16141	0.308797	0.588376
Q9P2J5	Leucine--tR0 ligase, cytoplasmic OS=Homo sapiens OX=9606 GN=LARS1 PE=1 SV=2	1	1	1	1	134.4	LARS1	-1.16562	0.418589	0.666931
P15153	Ras-related C3 botulinum toxin substrate 2 OS=Homo sapiens OX=9606 GN=RAC2 PE=1 SV=1	4	1	3	1	21.4	RAC2	-1.16715	0.366365	0.630629
Q9NVP2	Histone chaperone ASF1B OS=Homo sapiens OX=9606 GN=ASF1B PE=1 SV=1	10	1	2	1	22.4	ASF1B	-1.16754	0.462821	0.690867
P08123	Collagen alpha-2(I) chain OS=Homo sapiens OX=9606 GN=COL1A2 PE=1 SV=7	2	3	16	3	129.2	COL1A2	-1.17456	0.269101	0.561799
Q96JJ3	Engulfment and cell motility protein 2 OS=Homo sapiens OX=9606 GN=ELMO2 PE=1 SV=2	2	2	2	2	82.6	ELMO2	-1.17503	0.327448	0.598195
P04908	Histone H2A type 1-B/E OS=Homo sapiens OX=9606 GN=H2AC4 PE=1 SV=2	41	7	119	3	14.1	H2AC4; H2AC8	-1.17645	0.773372	0.874357
P46977	Dolichyl-diphosphooligosaccharide--protein glycosyltransferase subunit STT3A OS=Homo sapiens OX=9606 GN=STT3A PE=1 SV=2	1	1	5	1	80.5	STT3A	-1.18069	0.254444	0.559949
A0A0J9YX35	Immunoglobulin heavy variable 3-64D OS=Homo sapiens OX=9606 GN=IGHV3-64D PE=3 SV=1	9	1	1	1	12.8	IGHV3-64D	-1.18343	0.144675	0.458529
Q9BVJ6	U3 small nucleolar R0-associated protein 14 homolog A OS=Homo sapiens OX=9606 GN=UTP14A PE=1 SV=1	3	2	3	2	87.9	UTP14A	-1.18362	0.386781	0.644073
P51571	Translocon-associated protein subunit delta OS=Homo sapiens OX=9606 GN=SSR4 PE=1 SV=1	25	3	8	3	19	SSR4	-1.18408	0.385314	0.644073
Q02413	Desmoglein-1 OS=Homo sapiens OX=9606 GN=DSG1 PE=1 SV=2	29	23	98	23	113.7	DSG1	-1.18527	0.464502	0.691856
P68104	Elongation factor 1-alpha 1 OS=Homo sapiens OX=9606 GN=EEF1A1 PE=1 SV=1	40	20	195	20	50.1	EEF1A1	-1.18641	0.264274	0.561114
Q96PK6	R0-binding protein 14 OS=Homo sapiens OX=9606 GN=RBM14 PE=1 SV=2	31	20	144	20	69.4	RBM14	-1.19452	0.194643	0.498543
O75179	Ankyrin repeat domain-containing protein 17 OS=Homo sapiens OX=9606 GN=ANKRD17 PE=1 SV=3	0	1	3	1	274.1	ANKRD17	-1.197	0.291186	0.584619
Q01082	Spectrin beta chain, non-erythrocytic 1 OS=Homo sapiens OX=9606 GN=SPTBN1 PE=1 SV=2	0	1	3	1	274.4	SPTBN1	-1.19701	0.259492	0.559949
O75152	Zinc finger CCCH domain-containing protein 11A OS=Homo sapiens OX=9606 GN=ZC3H11A PE=1 SV=3	7	4	5	4	89.1	ZC3H11A	-1.19897	0.407105	0.659458
Q9NX00	Transmembrane protein 160 OS=Homo sapiens OX=9606 GN=TMEM160 PE=1 SV=1	9	2	2	2	19.6	TMEM160	-1.20332	0.27973	0.572276
P50502	Hsc70-interacting protein OS=Homo sapiens OX=9606 GN=ST13 PE=1 SV=2	4	1	1	1	41.3	ST13	-1.20537	0.163014	0.483861
P15924	Desmoplakin OS=Homo sapiens OX=9606 GN=DSP PE=1 SV=3	26	73	296	73	331.6	DSP	-1.20545	0.288888	0.581741
P63151	Serine/threonine-protein phosphatase 2A 55 kDa regulatory subunit B alpha isoform OS=Homo sapiens OX=9606 GN=PPP2R2A PE=1 SV=1	5	2	4	2	51.7	PPP2R2A	-1.20607	0.25135	0.558737
Q9HB07	MYG1 exonuclease OS=Homo sapiens OX=9606 GN=MYG1 PE=1 SV=3	3	1	4	1	42.5	0	-1.21448	0.312989	0.594159
Q9NWB6	Arginine and glutamate-rich protein 1 OS=Homo sapiens OX=9606 GN=ARGLU1 PE=1 SV=1	3	1	1	1	33.2	ARGLU1	-1.21481	0.414339	0.662813
P45973	Chromobox protein homolog 5 OS=Homo sapiens OX=9606 GN=CBX5 PE=1 SV=1	7	1	2	1	22.2	CBX5	-1.21882	0.0498398	0.296028
Q9UH99	SUN domain-containing protein 2 OS=Homo sapiens OX=9606 GN=SUN2 PE=1 SV=3	5	3	4	3	80.3	SUN2	-1.21978	0.214862	0.511979
P62316	Small nuclear ribonucleoprotein Sm D2 OS=Homo sapiens OX=9606 GN=SNRPD2 PE=1 SV=1	22	3	10	3	13.5	SNRPD2	-1.22087	0.323409	0.598195
Q15393	Splicing factor 3B subunit 3 OS=Homo sapiens OX=9606 GN=SF3B3 PE=1 SV=4	15	15	53	15	135.5	SF3B3	-1.22117	0.343685	0.609488
P04632	Calpain small subunit 1 OS=Homo sapiens OX=9606 GN=CAPNS1 PE=1 SV=1	3	1	4	1	28.3	CAPNS1	-1.2216	0.136087	0.447779
Q9Y5R8	Trafficking protein particle complex subunit 1 OS=Homo sapiens OX=9606 GN=TRAPPC1 PE=1 SV=1	6	1	2	1	16.8	TRAPPC1	-1.22256	0.342048	0.60881
Q7Z4H3	5'-deoxynucleotidase HDDC2 OS=Homo sapiens OX=9606 GN=HDDC2 PE=1 SV=1	18	3	10	3	23.4	HDDC2	-1.22976	0.370996	0.63251
Q9HCY8	Protein S100-A14 OS=Homo sapiens OX=9606 GN=S100A14 PE=1 SV=1	17	2	5	2	11.7	S100A14	-1.23249	0.418861	0.666931
Q15555	Microtubule-associated protein RP/EB family member 2 OS=Homo sapiens OX=9606 GN=MAPRE2 PE=1 SV=1	3	1	3	1	37	MAPRE2	-1.24609	0.132214	0.443689
Q04837	Single-stranded D0-binding protein, mitochondrial OS=Homo sapiens OX=9606 GN=SSBP1 PE=1 SV=1	30	5	20	5	17.2	SSBP1	-1.25018	0.245141	0.553318
Q9ULX6	A-ki0se anchor protein 8-like OS=Homo sapiens OX=9606 GN=AKAP8L PE=1 SV=4	4	1	3	1	71.6	AKAP8L	-1.2553	0.287526	0.581706
O43175	D-3-phosphoglycerate dehydroge0se OS=Homo sapiens OX=9606 GN=PHGDH PE=1 SV=4	29	12	85	12	56.6	PHGDH	-1.25784	0.169351	0.486664
Q99460	26S proteasome non-ATPase regulatory subunit 1 OS=Homo sapiens OX=9606 GN=PSMD1 PE=1 SV=2	1	1	6	1	105.8	PSMD1	-1.25938	0.106805	0.40443
O43592	Exportin-T OS=Homo sapiens OX=9606 GN=XPOT PE=1 SV=2	2	2	6	2	109.9	XPOT	-1.26604	0.43988	0.675463
Q8NCE2	Myotubularin-related protein 14 OS=Homo sapiens OX=9606 GN=MTMR14 PE=1 SV=2	1	1	3	1	72.2	MTMR14	-1.27057	0.344662	0.609488
O75175	CCR4-NOT transcription complex subunit 3 OS=Homo sapiens OX=9606 GN=CNOT3 PE=1 SV=1	3	1	1	1	81.8	CNOT3	-1.2776	0.236836	0.541716
Q9Y277	Voltage-dependent anion-selective channel protein 3 OS=Homo sapiens OX=9606 GN=VDAC3 PE=1 SV=1	7	2	7	1	30.6	VDAC3	-1.27896	0.33942	0.607803
Q86TJ2	Transcriptio0l adapter 2-beta OS=Homo sapiens OX=9606 GN=TADA2B PE=1 SV=2	2	1	8	1	48.4	TADA2B	-1.28091	0.306927	0.588376
Q99871	HAUS augmin-like complex subunit 7 OS=Homo sapiens OX=9606 GN=HAUS7 PE=1 SV=4	9	2	2	2	39.8	HAUS7	-1.28438	0.368454	0.631164
Q9Y4W6	AFG3-like protein 2 OS=Homo sapiens OX=9606 GN=AFG3L2 PE=1 SV=2	2	2	3	2	88.5	AFG3L2	-1.28458	0.268867	0.561799
P02751	Fibronectin OS=Homo sapiens OX=9606 GN=FN1 PE=1 SV=5	1	2	3	2	272.2	FN1	-1.28548	0.480488	0.695016
Q13148	TAR D0-binding protein 43 OS=Homo sapiens OX=9606 GN=TARDBP PE=1 SV=1	7	2	6	2	44.7	TARDBP	-1.28579	0.27078	0.561799
Q9H0B6	Kinesin light chain 2 OS=Homo sapiens OX=9606 GN=KLC2 PE=1 SV=1	2	1	3	1	68.9	KLC2	-1.28675	0.305369	0.587292
Q9H3R5	Centromere protein H OS=Homo sapiens OX=9606 GN=CENPH PE=1 SV=1	10	2	2	2	28.5	CENPH	-1.29491	0.383262	0.642479
O43482	Protein Mis18-beta OS=Homo sapiens OX=9606 GN=OIP5 PE=1 SV=2	4	1	2	1	24.7	OIP5	-1.29509	0.173111	0.486664
Q86UX7	Fermitin family homolog 3 OS=Homo sapiens OX=9606 GN=FERMT3 PE=1 SV=1	3	2	3	2	75.9	FERMT3	-1.29563	0.259528	0.559949
Q9UDW1	Cytochrome b-c1 complex subunit 9 OS=Homo sapiens OX=9606 GN=UQCR10 PE=1 SV=3	11	1	1	1	7.3	UQCR10	-1.29779	0.340129	0.607803
P15311	Ezrin OS=Homo sapiens OX=9606 GN=EZR PE=1 SV=4	1	1	3	1	69.4	EZR	-1.29832	0.0595024	0.316627
P09874	Poly [ADP-ribose] polymerase 1 OS=Homo sapiens OX=9606 GN=PARP1 PE=1 SV=4	13	10	42	10	113	PARP1	-1.29969	0.397524	0.652168
Q16650	T-box brain protein 1 OS=Homo sapiens OX=9606 GN=TBR1 PE=1 SV=1	2	1	2	1	74	TBR1	-1.29978	0.432722	0.673435
Q8WUM4	Programmed cell death 6-interacting protein OS=Homo sapiens OX=9606 GN=PDCD6IP PE=1 SV=1	3	2	3	2	96	PDCD6IP	-1.30253	0.0861381	0.367931
O14579	Coatomer subunit epsilon OS=Homo sapiens OX=9606 GN=COPE PE=1 SV=3	16	2	3	2	34.5	COPE	-1.30914	0.174174	0.486664
Q9UKU0	Long-chain-fatty-acid--CoA ligase 6 OS=Homo sapiens OX=9606 GN=ACSL6 PE=1 SV=4	1	1	1	1	77.7	ACSL6	-1.3106	0.066382	0.328904
Q6NSI4	RPA-related protein RADX OS=Homo sapiens OX=9606 GN=RADX PE=1 SV=2	1	1	2	1	97.5	RADX	-1.31295	0.198941	0.500766
P02788	Lactotransferrin OS=Homo sapiens OX=9606 GN=LTF PE=1 SV=6	23	13	58	13	78.1	LTF	-1.31479	0.32097	0.598195
P55795	Heterogeneous nuclear ribonucleoprotein H2 OS=Homo sapiens OX=9606 GN=HNRNPH2 PE=1 SV=1	23	9	131	1	49.2	HNRNPH2	-1.31578	0.317716	0.595427
Q8N0X7	Spartin OS=Homo sapiens OX=9606 GN=SPART PE=1 SV=1	4	3	4	3	72.8	SPART	-1.31643	0.139011	0.454665
P62314	Small nuclear ribonucleoprotein Sm D1 OS=Homo sapiens OX=9606 GN=SNRPD1 PE=1 SV=1	11	1	4	1	13.3	SNRPD1	-1.31703	0.0941102	0.380516
O94776	Metastasis-associated protein MTA2 OS=Homo sapiens OX=9606 GN=MTA2 PE=1 SV=1	5	3	4	3	75	MTA2	-1.3209	0.292284	0.584619
P26639	Threonine--tR0 ligase 1, cytoplasmic OS=Homo sapiens OX=9606 GN=TARS1 PE=1 SV=3	7	5	6	5	83.4	TARS1	-1.32116	0.0776934	0.353058
Q9H9F9	Actin-related protein 5 OS=Homo sapiens OX=9606 GN=ACTR5 PE=1 SV=2	1	1	2	1	68.3	ACTR5	-1.32453	0.270657	0.561799
Q92989	Polyribonucleotide 5'-hydroxyl-ki0se Clp1 OS=Homo sapiens OX=9606 GN=CLP1 PE=1 SV=1	2	1	1	1	47.6	CLP1	-1.32545	0.292594	0.584619
Q9NZB2	Constitutive coactivator of PPAR-gamma-like protein 1 OS=Homo sapiens OX=9606 GN=FAM120A PE=1 SV=2	2	2	4	2	121.8	FAM120A	-1.32745	0.379234	0.64174
P63173	Large ribosomal subunit protein eL38 OS=Homo sapiens OX=9606 GN=RPL38 PE=1 SV=2	36	2	3	2	8.2	RPL38	-1.32991	0.18198	0.486664
Q08379	Golgin subfamily A member 2 OS=Homo sapiens OX=9606 GN=GOLGA2 PE=1 SV=3	4	4	7	4	113	GOLGA2	-1.33134	0.256896	0.559949
Q02880	D0 topoisomerase 2-beta OS=Homo sapiens OX=9606 GN=TOP2B PE=1 SV=3	5	7	21	3	183.2	TOP2B	-1.33537	0.32515	0.598195
Q92769	Histone deacetylase 2 OS=Homo sapiens OX=9606 GN=HDAC2 PE=1 SV=2	11	4	14	1	55.3	HDAC2	-1.33933	0.157471	0.477141
O14776	Transcription elongation regulator 1 OS=Homo sapiens OX=9606 GN=TCERG1 PE=1 SV=2	2	2	3	2	123.8	TCERG1	-1.34216	0.299704	0.587292
Q15493	Regucalcin OS=Homo sapiens OX=9606 GN=RGN PE=1 SV=1	6	1	1	1	33.2	RGN	-1.34601	0.226906	0.526033
Q2TAY7	WD40 repeat-containing protein SMU1 OS=Homo sapiens OX=9606 GN=SMU1 PE=1 SV=2	2	1	5	1	57.5	SMU1	-1.34747	0.0545985	0.304743
P36871	Phosphoglucomutase-1 OS=Homo sapiens OX=9606 GN=PGM1 PE=1 SV=3	4	2	2	2	61.4	PGM1	-1.34894	0.423836	0.669661
Q6FI81	A0morsin OS=Homo sapiens OX=9606 GN=CIAPIN1 PE=1 SV=2	5	2	2	2	33.6	CIAPIN1	-1.34933	0.0927088	0.377802
P04843	Dolichyl-diphosphooligosaccharide--protein glycosyltransferase subunit 1 OS=Homo sapiens OX=9606 GN=RPN1 PE=1 SV=1	9	5	8	5	68.5	RPN1	-1.36478	0.158513	0.477399
P33121	Long-chain-fatty-acid--CoA ligase 1 OS=Homo sapiens OX=9606 GN=ACSL1 PE=1 SV=1	1	1	2	1	77.9	ACSL1	-1.36616	0.180704	0.486664
P50570	Dy0min-2 OS=Homo sapiens OX=9606 GN=DNM2 PE=1 SV=2	3	2	5	2	98	DNM2	-1.36835	0.156012	0.475442
O43390	Heterogeneous nuclear ribonucleoprotein R OS=Homo sapiens OX=9606 GN=HNRNPR PE=1 SV=1	8	5	28	2	70.9	HNRNPR	-1.36927	0.266982	0.561114
Q5R372	Rab GTPase-activating protein 1-like OS=Homo sapiens OX=9606 GN=RABGAP1L PE=1 SV=1	1	1	1	1	92.5	RABGAP1L	-1.36941	0.398571	0.652203
Q5BKZ1	DBIRD complex subunit ZNF326 OS=Homo sapiens OX=9606 GN=ZNF326 PE=1 SV=2	6	4	13	4	65.6	ZNF326	-1.3718	0.2567	0.559949
P54886	Delta-1-pyrroline-5-carboxylate synthase OS=Homo sapiens OX=9606 GN=ALDH18A1 PE=1 SV=2	3	2	5	2	87.2	ALDH18A1	-1.37755	0.327758	0.598195
Q9BWF3	R0-binding protein 4 OS=Homo sapiens OX=9606 GN=RBM4 PE=1 SV=1	12	3	5	3	40.3	RBM4	-1.37994	0.307956	0.588376
O75934	Pre-mR0-splicing factor SPF27 OS=Homo sapiens OX=9606 GN=BCAS2 PE=1 SV=1	6	1	1	1	26.1	BCAS2	-1.3847	0.127166	0.433886
P13716	Delta-aminolevulinic acid dehydratase OS=Homo sapiens OX=9606 GN=ALAD PE=1 SV=1	3	1	1	1	36.3	ALAD	-1.38577	0.238038	0.542446
Q14152	Eukaryotic translation initiation factor 3 subunit A OS=Homo sapiens OX=9606 GN=EIF3A PE=1 SV=1	3	3	4	3	166.5	EIF3A	-1.3886	0.102998	0.401358
Q8IUE6	Histone H2A type 2-B OS=Homo sapiens OX=9606 GN=H2AC21 PE=1 SV=3	41	6	45	3	14	H2AC21	-1.38985	0.471781	0.693728
P01834	Immunoglobulin kappa constant OS=Homo sapiens OX=9606 GN=IGKC PE=1 SV=2	66	4	24	4	11.8	IGKC	-1.39085	0.616588	0.785043
P35613	Basigin OS=Homo sapiens OX=9606 GN=BSG PE=1 SV=2	6	2	3	2	42.2	BSG	-1.39404	0.368742	0.631164
Q7KZI7	Serine/threonine-protein ki0se MARK2 OS=Homo sapiens OX=9606 GN=MARK2 PE=1 SV=2	5	2	3	2	87.9	MARK2	-1.39965	0.326567	0.598195
Q96HC4	PDZ and LIM domain protein 5 OS=Homo sapiens OX=9606 GN=PDLIM5 PE=1 SV=5	6	3	5	3	63.9	PDLIM5	-1.40088	0.26939	0.561799
Q14204	Cytoplasmic dynein 1 heavy chain 1 OS=Homo sapiens OX=9606 GN=DYNC1H1 PE=1 SV=5	1	5	10	5	532.1	DYNC1H1	-1.40349	0.259501	0.559949
P62304	Small nuclear ribonucleoprotein E OS=Homo sapiens OX=9606 GN=SNRPE PE=1 SV=1	12	1	4	1	10.8	SNRPE	-1.40734	0.176988	0.486664
Q96HS1	Serine/threonine-protein phosphatase PGAM5, mitochondrial OS=Homo sapiens OX=9606 GN=PGAM5 PE=1 SV=2	33	12	70	12	32	PGAM5	-1.40753	0.160475	0.479452
O43819	Protein SCO2 homolog, mitochondrial OS=Homo sapiens OX=9606 GN=SCO2 PE=1 SV=3	3	1	1	1	29.8	SCO2	-1.41024	0.115452	0.409962
Q99459	Cell division cycle 5-like protein OS=Homo sapiens OX=9606 GN=CDC5L PE=1 SV=2	2	2	5	2	92.2	CDC5L	-1.41335	0.266142	0.561114
Q53FZ2	Acyl-coenzyme A synthetase ACSM3, mitochondrial OS=Homo sapiens OX=9606 GN=ACSM3 PE=1 SV=2	1	1	3	1	66.1	ACSM3	-1.41741	0.178392	0.486664
P00558	Phosphoglycerate ki0se 1 OS=Homo sapiens OX=9606 GN=PGK1 PE=1 SV=3	14	4	4	4	44.6	PGK1	-1.41882	0.169776	0.486664
Q14974	Importin subunit beta-1 OS=Homo sapiens OX=9606 GN=KPNB1 PE=1 SV=2	13	9	52	9	97.1	KPNB1	-1.42429	0.0927493	0.377802
Q9UJZ1	Stomatin-like protein 2, mitochondrial OS=Homo sapiens OX=9606 GN=STOML2 PE=1 SV=1	9	2	11	2	38.5	STOML2	-1.43115	0.390187	0.645111
O00560	Syntenin-1 OS=Homo sapiens OX=9606 GN=SDCBP PE=1 SV=1	11	2	2	2	32.4	SDCBP	-1.43164	0.178559	0.486664
P13489	Ribonuclease inhibitor OS=Homo sapiens OX=9606 GN=RNH1 PE=1 SV=2	2	1	5	1	49.9	RNH1	-1.43317	0.0983905	0.38901
P49189	4-trimethylaminobutyraldehyde dehydroge0se OS=Homo sapiens OX=9606 GN=ALDH9A1 PE=1 SV=3	7	3	3	3	53.8	ALDH9A1	-1.43592	0.160595	0.479452
O94832	Unconventio0l myosin-Id OS=Homo sapiens OX=9606 GN=MYO1D PE=1 SV=2	2	2	4	2	116.1	MYO1D	-1.43611	0.115003	0.409962
P21266	Glutathione S-transferase Mu 3 OS=Homo sapiens OX=9606 GN=GSTM3 PE=1 SV=3	10	2	4	1	26.5	GSTM3	-1.43938	0.145252	0.458529
Q9H3K6	BolA-like protein 2 OS=Homo sapiens OX=9606 GN=BOLA2 PE=1 SV=1	29	3	8	3	10.1	BOLA2; BOLA2B	-1.44068	0.155932	0.475442
Q9Y5B9	FACT complex subunit SPT16 OS=Homo sapiens OX=9606 GN=SUPT16H PE=1 SV=1	4	3	5	3	119.8	SUPT16H	-1.44538	0.112193	0.406643
P04181	Ornithine aminotransferase, mitochondrial OS=Homo sapiens OX=9606 GN=OAT PE=1 SV=1	15	5	11	5	48.5	OAT	-1.45214	0.13647	0.447779
Q16769	Glutaminyl-peptide cyclotransferase OS=Homo sapiens OX=9606 GN=QPCT PE=1 SV=1	19	5	10	5	40.9	QPCT	-1.45986	0.198626	0.500766
Q16531	D0 damage-binding protein 1 OS=Homo sapiens OX=9606 GN=DDB1 PE=1 SV=1	16	17	39	17	126.9	DDB1	-1.46706	0.281156	0.573724
P43686	26S proteasome regulatory subunit 6B OS=Homo sapiens OX=9606 GN=PSMC4 PE=1 SV=2	17	7	16	7	47.3	PSMC4	-1.46867	0.331816	0.602642
O95163	Elongator complex protein 1 OS=Homo sapiens OX=9606 GN=ELP1 PE=1 SV=3	1	1	2	1	150.2	ELP1	-1.46906	0.28533	0.579119
Q04917	14-3-3 protein eta OS=Homo sapiens OX=9606 GN=YWHAH PE=1 SV=4	23	6	50	2	28.2	YWHAH	-1.47094	0.117746	0.414127
P34896	Serine hydroxymethyltransferase, cytosolic OS=Homo sapiens OX=9606 GN=SHMT1 PE=1 SV=1	2	1	1	1	53	SHMT1	-1.47404	0.165845	0.48525
O75533	Splicing factor 3B subunit 1 OS=Homo sapiens OX=9606 GN=SF3B1 PE=1 SV=3	6	7	16	7	145.7	SF3B1	-1.47857	0.203755	0.504231
P00492	Hypoxanthine-guanine phosphoribosyltransferase OS=Homo sapiens OX=9606 GN=HPRT1 PE=1 SV=2	16	3	16	3	24.6	HPRT1	-1.48908	0.316127	0.595427
P39656	Dolichyl-diphosphooligosaccharide--protein glycosyltransferase 48 kDa subunit OS=Homo sapiens OX=9606 GN=DDOST PE=1 SV=4	11	5	12	5	50.8	DDOST	-1.49057	0.265153	0.561114
P15056	Serine/threonine-protein ki0se B-raf OS=Homo sapiens OX=9606 GN=BRAF PE=1 SV=4	2	2	3	2	84.4	BRAF	-1.49369	0.325485	0.598195
P53396	ATP-citrate synthase OS=Homo sapiens OX=9606 GN=ACLY PE=1 SV=3	8	8	19	8	120.8	ACLY	-1.49793	0.103564	0.401358
P08670	Vimentin OS=Homo sapiens OX=9606 GN=VIM PE=1 SV=4	85	54	646	49	53.6	VIM	-1.498	0.141612	0.457928
Q7Z7M9	Polypeptide N-acetylgalactosaminyltransferase 5 OS=Homo sapiens OX=9606 GN=GALNT5 PE=1 SV=1	1	1	1	1	106.2	GALNT5	-1.50678	0.0337408	0.263553
P62318	Small nuclear ribonucleoprotein Sm D3 OS=Homo sapiens OX=9606 GN=SNRPD3 PE=1 SV=1	15	2	19	2	13.9	SNRPD3	-1.50922	0.146767	0.459542
P41091	Eukaryotic translation initiation factor 2 subunit 3 OS=Homo sapiens OX=9606 GN=EIF2S3 PE=1 SV=3	7	3	6	3	51.1	EIF2S3	-1.51073	0.106781	0.40443
Q16891	MICOS complex subunit MIC60 OS=Homo sapiens OX=9606 GN=IMMT PE=1 SV=1	5	3	4	3	83.6	IMMT	-1.51161	0.223096	0.523104
P13639	Elongation factor 2 OS=Homo sapiens OX=9606 GN=EEF2 PE=1 SV=4	41	31	200	30	95.3	EEF2	-1.5132	0.11338	0.406643
Q01081	Splicing factor U2AF 35 kDa subunit OS=Homo sapiens OX=9606 GN=U2AF1 PE=1 SV=3	5	1	6	1	27.9	U2AF1	-1.51814	0.288304	0.581706
P27694	Replication protein A 70 kDa D0-binding subunit OS=Homo sapiens OX=9606 GN=RPA1 PE=1 SV=2	17	8	14	8	68.1	RPA1	-1.52365	0.0238941	0.253951
Q9H857	5'-nucleotidase domain-containing protein 2 OS=Homo sapiens OX=9606 GN=NT5DC2 PE=1 SV=1	6	3	6	3	60.7	NT5DC2	-1.52367	0.225164	0.524362
Q9UQ80	Proliferation-associated protein 2G4 OS=Homo sapiens OX=9606 GN=PA2G4 PE=1 SV=3	2	1	2	1	43.8	PA2G4	-1.53208	0.0845645	0.367129
Q9Y2H1	Serine/threonine-protein ki0se 38-like OS=Homo sapiens OX=9606 GN=STK38L PE=1 SV=3	12	6	12	2	54	STK38L	-1.53259	0.128273	0.436213
P08195	Amino acid transporter heavy chain SLC3A2 OS=Homo sapiens OX=9606 GN=SLC3A2 PE=1 SV=3	7	3	11	3	68	SLC3A2	-1.53582	0.125751	0.432075
Q13835	Plakophilin-1 OS=Homo sapiens OX=9606 GN=PKP1 PE=1 SV=2	3	2	3	2	82.8	PKP1	-1.53625	0.301208	0.587292
P28838	Cytosol aminopeptidase OS=Homo sapiens OX=9606 GN=LAP3 PE=1 SV=3	2	1	1	1	56.1	LAP3	-1.53813	0.244636	0.553318
O95299	0DH dehydroge0se [ubiquinone] 1 alpha subcomplex subunit 10, mitochondrial OS=Homo sapiens OX=9606 GN=NDUFA10 PE=1 SV=1	5	2	2	2	40.7	NDUFA10	-1.54326	0.211665	0.510282
Q14683	Structural mainte0nce of chromosomes protein 1A OS=Homo sapiens OX=9606 GN=SMC1A PE=1 SV=2	3	4	7	4	143.1	SMC1A	-1.54877	0.367101	0.630629
Q14690	Protein RRP5 homolog OS=Homo sapiens OX=9606 GN=PDCD11 PE=1 SV=3	3	4	4	4	208.6	PDCD11	-1.5545	0.263517	0.561114
P28482	Mitogen-activated protein ki0se 1 OS=Homo sapiens OX=9606 GN=MAPK1 PE=1 SV=3	3	1	6	1	41.4	MAPK1	-1.55459	0.036018	0.263553
Q96I24	Far upstream element-binding protein 3 OS=Homo sapiens OX=9606 GN=FUBP3 PE=1 SV=2	3	2	5	2	61.6	FUBP3	-1.55803	0.198504	0.500766
Q00610	Clathrin heavy chain 1 OS=Homo sapiens OX=9606 GN=CLTC PE=1 SV=5	19	24	99	24	191.5	CLTC	-1.56054	0.190353	0.491187
Q15369	Elongin-C OS=Homo sapiens OX=9606 GN=ELOC PE=1 SV=1	18	1	2	1	12.5	ELOC	-1.5647	0.469799	0.693728
Q92974	Rho guanine nucleotide exchange factor 2 OS=Homo sapiens OX=9606 GN=ARHGEF2 PE=1 SV=4	2	3	5	3	111.5	ARHGEF2	-1.56476	0.112474	0.406643
P68371	Tubulin beta-4B chain OS=Homo sapiens OX=9606 GN=TUBB4B PE=1 SV=1	67	28	807	1	49.8	TUBB4B	-1.57721	0.174942	0.486664
P22087	rR0 2'-O-methyltransferase fibrillarin OS=Homo sapiens OX=9606 GN=FBL PE=1 SV=2	30	9	47	9	33.8	FBL	-1.57867	0.165403	0.48525
Q9BV38	WD repeat-containing protein 18 OS=Homo sapiens OX=9606 GN=WDR18 PE=1 SV=2	4	2	3	2	47.4	WDR18	-1.58427	0.18753	0.491187
Q9BUJ2	Heterogeneous nuclear ribonucleoprotein U-like protein 1 OS=Homo sapiens OX=9606 GN=HNRNPUL1 PE=1 SV=2	3	3	6	3	95.7	HNRNPUL1	-1.59281	0.170163	0.486664
Q9UQE7	Structural mainte0nce of chromosomes protein 3 OS=Homo sapiens OX=9606 GN=SMC3 PE=1 SV=2	2	3	5	3	141.5	SMC3	-1.59434	0.0875149	0.368351
O75131	Copine-3 OS=Homo sapiens OX=9606 GN=CPNE3 PE=1 SV=1	5	3	11	3	60.1	CPNE3	-1.6	0.150479	0.46831
O43684	Mitotic checkpoint protein BUB3 OS=Homo sapiens OX=9606 GN=BUB3 PE=1 SV=1	21	7	16	7	37.1	BUB3	-1.60273	0.317225	0.595427
P25398	Small ribosomal subunit protein eS12 OS=Homo sapiens OX=9606 GN=RPS12 PE=1 SV=3	8	1	13	1	14.5	RPS12	-1.60649	0.157602	0.477141
Q13151	Heterogeneous nuclear ribonucleoprotein A0 OS=Homo sapiens OX=9606 GN=HNRNPA0 PE=1 SV=1	14	4	20	2	30.8	HNRNPA0	-1.60731	0.0454283	0.284481
Q9BXS5	AP-1 complex subunit mu-1 OS=Homo sapiens OX=9606 GN=AP1M1 PE=1 SV=3	9	3	3	3	48.6	AP1M1	-1.60803	0.110465	0.40517
P56134	ATP synthase subunit f, mitochondrial OS=Homo sapiens OX=9606 GN=ATP5MF PE=1 SV=3	14	1	2	1	10.9	ATP5MF	-1.60853	0.197316	0.500766
Q9P035	Very-long-chain (3R)-3-hydroxyacyl-CoA dehydratase 3 OS=Homo sapiens OX=9606 GN=HACD3 PE=1 SV=2	4	1	4	1	43.1	HACD3	-1.61153	0.190265	0.491187
Q14566	D0 replication licensing factor MCM6 OS=Homo sapiens OX=9606 GN=MCM6 PE=1 SV=1	5	4	8	4	92.8	MCM6	-1.61821	0.103249	0.401358
P02452	Collagen alpha-1(I) chain OS=Homo sapiens OX=9606 GN=COL1A1 PE=1 SV=6	5	5	10	5	138.8	COL1A1	-1.61933	0.107065	0.40443
Q8WWK9	Cytoskeleton-associated protein 2 OS=Homo sapiens OX=9606 GN=CKAP2 PE=1 SV=1	7	4	8	4	76.9	CKAP2	-1.62051	0.0907176	0.374165
Q6P2Q9	Pre-mR0-processing-splicing factor 8 OS=Homo sapiens OX=9606 GN=PRPF8 PE=1 SV=2	7	15	28	15	273.4	PRPF8	-1.62096	0.371992	0.63251
Q9NVQ4	Fas apoptotic inhibitory molecule 1 OS=Homo sapiens OX=9606 GN=FAIM PE=1 SV=1	7	1	1	1	20.2	FAIM	-1.62235	0.0660823	0.328904
Q92599	Septin-8 OS=Homo sapiens OX=9606 GN=SEPTIN8 PE=1 SV=4	5	3	10	1	55.7	SEPTIN8	-1.62675	0.496962	0.708701
P57740	Nuclear pore complex protein Nup107 OS=Homo sapiens OX=9606 GN=NUP107 PE=1 SV=1	2	2	3	2	106.3	NUP107	-1.62894	0.264472	0.561114
Q14019	Coactosin-like protein OS=Homo sapiens OX=9606 GN=COTL1 PE=1 SV=3	5	1	1	1	15.9	COTL1	-1.6402	0.106924	0.40443
P06748	Nucleophosmin OS=Homo sapiens OX=9606 GN=NPM1 PE=1 SV=2	35	12	87	12	32.6	NPM1	-1.64543	0.0384702	0.265152
P22392	Nucleoside diphosphate ki0se B OS=Homo sapiens OX=9606 GN=NME2 PE=1 SV=1	44	7	44	2	17.3	NME2	-1.65101	0.0570562	0.310265
P36551	Oxygen-dependent coproporphyrinogen-III oxidase, mitochondrial OS=Homo sapiens OX=9606 GN=CPOX PE=1 SV=3	2	1	1	1	50.1	CPOX	-1.652	0.0468265	0.289704
Q9P0M6	Core histone macro-H2A.2 OS=Homo sapiens OX=9606 GN=MACROH2A2 PE=1 SV=3	10	3	17	1	40	MACROH2A2	-1.65333	0.124944	0.432047
O43683	Mitotic checkpoint serine/threonine-protein ki0se BUB1 OS=Homo sapiens OX=9606 GN=BUB1 PE=1 SV=1	3	3	3	3	122.3	BUB1	-1.65584	0.0272979	0.253951
Q8TDN6	Ribosome biogenesis protein BRX1 homolog OS=Homo sapiens OX=9606 GN=BRIX1 PE=1 SV=2	10	4	21	4	41.4	BRIX1	-1.65598	0.304833	0.587292
Q9H4I3	TraB domain-containing protein OS=Homo sapiens OX=9606 GN=TRABD PE=1 SV=1	3	1	1	1	42.3	TRABD	-1.65741	0.23622	0.541514
Q9UNM6	26S proteasome non-ATPase regulatory subunit 13 OS=Homo sapiens OX=9606 GN=PSMD13 PE=1 SV=2	10	4	12	4	42.9	PSMD13	-1.65799	0.297831	0.587088
Q04727	Transducin-like enhancer protein 4 OS=Homo sapiens OX=9606 GN=TLE4 PE=1 SV=3	2	2	7	2	83.7	TLE4	-1.66855	0.296741	0.587088
Q9BVP2	Guanine nucleotide-binding protein-like 3 OS=Homo sapiens OX=9606 GN=GNL3 PE=1 SV=2	10	4	11	4	62	GNL3	-1.66953	0.20507	0.50438
Q6UVJ0	Spindle assembly abnormal protein 6 homolog OS=Homo sapiens OX=9606 GN=SASS6 PE=1 SV=1	2	1	2	1	74.4	SASS6	-1.66991	0.307646	0.588376
P00403	Cytochrome c oxidase subunit 2 OS=Homo sapiens OX=9606 GN=MT-CO2 PE=1 SV=1	7	3	13	3	25.5	MT-CO2	-1.67364	0.120777	0.421899
Q6FI13	Histone H2A type 2-A OS=Homo sapiens OX=9606 GN=H2AC18 PE=1 SV=3	63	8	131	3	14.1	H2AC18; H2AC19	-1.6798	0.704909	0.839677
Q96CW1	AP-2 complex subunit mu OS=Homo sapiens OX=9606 GN=AP2M1 PE=1 SV=2	2	1	3	1	49.6	AP2M1	-1.68071	0.213861	0.511971
O00303	Eukaryotic translation initiation factor 3 subunit F OS=Homo sapiens OX=9606 GN=EIF3F PE=1 SV=1	24	7	16	7	37.5	EIF3F	-1.68103	0.328252	0.598195
Q9H0L4	Cleavage stimulation factor subunit 2 tau variant OS=Homo sapiens OX=9606 GN=CSTF2T PE=1 SV=1	3	2	5	2	64.4	CSTF2T	-1.68169	0.0847221	0.367129
B5ME19	Eukaryotic translation initiation factor 3 subunit C-like protein OS=Homo sapiens OX=9606 GN=EIF3CL PE=1 SV=1	4	4	9	4	105.4	EIF3CL	-1.68329	0.19466	0.498543
Q13616	Cullin-1 OS=Homo sapiens OX=9606 GN=CUL1 PE=1 SV=2	3	3	5	3	89.6	CUL1	-1.69102	0.0144445	0.187828
P61163	Alpha-centractin OS=Homo sapiens OX=9606 GN=ACTR1A PE=1 SV=1	8	2	5	2	42.6	ACTR1A	-1.69322	0.156006	0.475442
Q6DKI1	Ribosomal protein uL30-like OS=Homo sapiens OX=9606 GN=RPL7L1 PE=1 SV=2	4	1	3	1	29.7	RPL7L1	-1.70093	0.175441	0.486664
Q99873	Protein arginine N-methyltransferase 1 OS=Homo sapiens OX=9606 GN=PRMT1 PE=1 SV=3	6	2	6	2	42.4	PRMT1	-1.71012	0.247962	0.556021
P26373	Large ribosomal subunit protein eL13 OS=Homo sapiens OX=9606 GN=RPL13 PE=1 SV=4	37	7	58	7	24.2	RPL13	-1.71307	0.117661	0.414127
P04637	Cellular tumor antigen p53 OS=Homo sapiens OX=9606 GN=TP53 PE=1 SV=4	12	4	15	4	43.6	TP53	-1.72141	0.0714849	0.343061
Q00839	Heterogeneous nuclear ribonucleoprotein U OS=Homo sapiens OX=9606 GN=HNRNPU PE=1 SV=6	20	19	128	19	90.5	HNRNPU	-1.72426	0.0711323	0.342971
O43747	AP-1 complex subunit gamma-1 OS=Homo sapiens OX=9606 GN=AP1G1 PE=1 SV=5	2	2	5	2	91.3	AP1G1	-1.7265	0.0204542	0.236028
O00311	Cell division cycle 7-related protein ki0se OS=Homo sapiens OX=9606 GN=CDC7 PE=1 SV=1	2	1	1	1	63.8	CDC7	-1.7278	0.277723	0.570444
Q92734	Protein TFG OS=Homo sapiens OX=9606 GN=TFG PE=1 SV=2	13	2	9	2	43.4	TFG	-1.73556	0.219086	0.516057
P46087	Probable 28S rR0 (cytosine(4447)-C(5))-methyltransferase OS=Homo sapiens OX=9606 GN=NOP2 PE=1 SV=2	10	7	18	7	89.2	NOP2	-1.73925	0.176321	0.486664
P01833	Polymeric immunoglobulin receptor OS=Homo sapiens OX=9606 GN=PIGR PE=1 SV=4	23	17	61	17	83.2	PIGR	-1.74059	0.364111	0.630593
Q00535	Cyclin-dependent ki0se 5 OS=Homo sapiens OX=9606 GN=CDK5 PE=1 SV=3	5	2	17	1	33.3	CDK5	-1.74158	0.472167	0.693728
P52907	F-actin-capping protein subunit alpha-1 OS=Homo sapiens OX=9606 GN=CAPZA1 PE=1 SV=3	27	5	20	4	32.9	CAPZA1	-1.74192	0.153309	0.472819
P10155	R0-binding protein RO60 OS=Homo sapiens OX=9606 GN=RO60 PE=1 SV=2	2	1	1	1	60.6	RO60	-1.74319	0.174373	0.486664
O96019	Actin-like protein 6A OS=Homo sapiens OX=9606 GN=ACTL6A PE=1 SV=1	2	1	1	1	47.4	ACTL6A	-1.74445	0.151265	0.469332
P49915	GMP synthase [glutamine-hydrolyzing] OS=Homo sapiens OX=9606 GN=GMPS PE=1 SV=1	2	1	2	1	76.7	GMPS	-1.74908	0.216569	0.512479
Q8WUA4	General transcription factor 3C polypeptide 2 OS=Homo sapiens OX=9606 GN=GTF3C2 PE=1 SV=2	1	1	2	1	100.6	GTF3C2	-1.75143	0.0398095	0.265152
A0A087WW87	Immunoglobulin kappa variable 2-40 OS=Homo sapiens OX=9606 GN=IGKV2-40 PE=3 SV=2	19	4	803	2	13.3	IGKV2-40	-1.75766	0.382323	0.642479
Q14137	Ribosome biogenesis protein BOP1 OS=Homo sapiens OX=9606 GN=BOP1 PE=1 SV=2	1	1	2	1	83.6	BOP1	-1.75887	0.238759	0.542489
P19388	D0-directed R0 polymerases I, II, and III subunit RPABC1 OS=Homo sapiens OX=9606 GN=POLR2E PE=1 SV=4	8	2	7	2	24.5	POLR2E	-1.76437	0.17048	0.486664
P61619	Protein transport protein Sec61 subunit alpha isoform 1 OS=Homo sapiens OX=9606 GN=SEC61A1 PE=1 SV=2	5	3	9	3	52.2	SEC61A1	-1.76776	0.111195	0.405452
Q86VP6	Cullin-associated NEDD8-dissociated protein 1 OS=Homo sapiens OX=9606 GN=CAND1 PE=1 SV=2	5	6	15	6	136.3	CAND1	-1.77293	0.0521248	0.302014
P40616	ADP-ribosylation factor-like protein 1 OS=Homo sapiens OX=9606 GN=ARL1 PE=1 SV=1	11	2	3	2	20.4	ARL1	-1.77371	0.141793	0.457928
P16615	Sarcoplasmic/endoplasmic reticulum calcium ATPase 2 OS=Homo sapiens OX=9606 GN=ATP2A2 PE=1 SV=1	3	2	4	2	114.7	ATP2A2	-1.78024	0.0144483	0.187828
Q15370	Elongin-B OS=Homo sapiens OX=9606 GN=ELOB PE=1 SV=1	16	2	3	2	13.1	ELOB	-1.78072	0.0651849	0.328904
P46779	Large ribosomal subunit protein eL28 OS=Homo sapiens OX=9606 GN=RPL28 PE=1 SV=3	50	9	45	9	15.7	RPL28	-1.78201	0.0288608	0.253951
P04080	Cystatin-B OS=Homo sapiens OX=9606 GN=CSTB PE=1 SV=2	34	2	3	2	11.1	CSTB	-1.79049	0.0491654	0.296028
O75436	Vacuolar protein sorting-associated protein 26A OS=Homo sapiens OX=9606 GN=VPS26A PE=1 SV=2	4	1	1	1	38.1	VPS26A	-1.79305	0.0806543	0.360139
P38646	Stress-70 protein, mitochondrial OS=Homo sapiens OX=9606 GN=HSPA9 PE=1 SV=2	28	17	101	16	73.6	HSPA9	-1.80587	0.0608975	0.32238
P62841	Small ribosomal subunit protein uS19 OS=Homo sapiens OX=9606 GN=RPS15 PE=1 SV=2	8	1	1	1	17	RPS15	-1.80703	0.0977701	0.38901
O15226	NF-kappa-B-repressing factor OS=Homo sapiens OX=9606 GN=NKRF PE=1 SV=2	3	2	2	2	77.6	NKRF	-1.81011	0.075474	0.349152
Q9Y3I0	R0-splicing ligase RtcB homolog OS=Homo sapiens OX=9606 GN=RTCB PE=1 SV=1	7	3	15	3	55.2	RTCB	-1.81564	0.032731	0.262615
P62266	Small ribosomal subunit protein uS12 OS=Homo sapiens OX=9606 GN=RPS23 PE=1 SV=3	29	5	47	5	15.8	RPS23	-1.81818	0.0382243	0.265152
Q9H8H0	Nucleolar protein 11 OS=Homo sapiens OX=9606 GN=NOL11 PE=1 SV=1	2	1	2	1	81.1	NOL11	-1.82012	0.125842	0.432075
Q9UBF2	Coatomer subunit gamma-2 OS=Homo sapiens OX=9606 GN=COPG2 PE=1 SV=1	4	4	13	2	97.6	COPG2	-1.82418	0.0501547	0.296028
O00148	ATP-dependent R0 helicase DDX39A OS=Homo sapiens OX=9606 GN=DDX39A PE=1 SV=2	8	4	17	4	49.1	DDX39A	-1.82752	0.113638	0.406643
P46782	Small ribosomal subunit protein uS7 OS=Homo sapiens OX=9606 GN=RPS5 PE=1 SV=4	17	5	18	5	22.9	RPS5	-1.83658	0.188033	0.491187
P07900	Heat shock protein HSP 90-alpha OS=Homo sapiens OX=9606 GN=HSP90AA1 PE=1 SV=5	32	24	179	14	84.6	HSP90AA1	-1.84665	0.00439706	0.140491
P22695	Cytochrome b-c1 complex subunit 2, mitochondrial OS=Homo sapiens OX=9606 GN=UQCRC2 PE=1 SV=3	7	2	4	2	48.4	UQCRC2	-1.86005	0.0660064	0.328904
P62136	Serine/threonine-protein phosphatase PP1-alpha catalytic subunit OS=Homo sapiens OX=9606 GN=PPP1CA PE=1 SV=1	11	3	8	1	37.5	PPP1CA	-1.86169	0.149341	0.466179
Q9Y2X3	Nucleolar protein 58 OS=Homo sapiens OX=9606 GN=NOP58 PE=1 SV=1	13	5	28	5	59.5	NOP58	-1.863	0.096367	0.386597
Q16890	Tumor protein D53 OS=Homo sapiens OX=9606 GN=TPD52L1 PE=1 SV=1	4	1	2	1	22.4	TPD52L1	-1.86891	0.214679	0.511979
P11142	Heat shock cog0te 71 kDa protein OS=Homo sapiens OX=9606 GN=HSPA8 PE=1 SV=1	55	34	339	27	70.9	HSPA8	-1.87114	0.0287243	0.253951
Q2NKX8	D0 excision repair protein ERCC-6-like OS=Homo sapiens OX=9606 GN=ERCC6L PE=1 SV=1	1	1	1	1	141	ERCC6L	-1.87126	0.00981224	0.175259
Q9Y6C9	Mitochondrial carrier homolog 2 OS=Homo sapiens OX=9606 GN=MTCH2 PE=1 SV=1	5	2	6	2	33.3	MTCH2	-1.87157	0.108416	0.40443
P04844	Dolichyl-diphosphooligosaccharide--protein glycosyltransferase subunit 2 OS=Homo sapiens OX=9606 GN=RPN2 PE=1 SV=3	9	4	10	4	69.2	RPN2	-1.87343	0.21161	0.510282
O15371	Eukaryotic translation initiation factor 3 subunit D OS=Homo sapiens OX=9606 GN=EIF3D PE=1 SV=1	9	3	7	3	63.9	EIF3D	-1.87449	0.248956	0.557031
P78527	D0-dependent protein ki0se catalytic subunit OS=Homo sapiens OX=9606 GN=PRKDC PE=1 SV=3	2	9	18	9	468.8	PRKDC	-1.87486	0.207322	0.507246
P35232	Prohibitin 1 OS=Homo sapiens OX=9606 GN=PHB1 PE=1 SV=1	19	5	10	5	29.8	PHB1	-1.87619	0.178162	0.486664
P46778	Large ribosomal subunit protein eL21 OS=Homo sapiens OX=9606 GN=RPL21 PE=1 SV=2	33	5	24	5	18.6	RPL21	-1.87912	0.22657	0.526033
Q08945	FACT complex subunit SSRP1 OS=Homo sapiens OX=9606 GN=SSRP1 PE=1 SV=1	14	8	22	8	81	SSRP1	-1.87945	0.0104618	0.175259
P78347	General transcription factor II-I OS=Homo sapiens OX=9606 GN=GTF2I PE=1 SV=2	6	4	6	4	112.3	GTF2I	-1.88199	0.126215	0.432075
P00451	Coagulation factor VIII OS=Homo sapiens OX=9606 GN=F8 PE=1 SV=1	1	1	1	1	266.8	F8	-1.88318	0.0635177	0.328904
Q15233	Non-POU domain-containing octamer-binding protein OS=Homo sapiens OX=9606 GN=NONO PE=1 SV=4	24	10	30	9	54.2	NONO	-1.88436	0.342796	0.609086
P51570	Galactoki0se OS=Homo sapiens OX=9606 GN=GALK1 PE=1 SV=1	8	2	2	2	42.2	GALK1	-1.88583	0.109082	0.40443
Q9BXP5	Serrate R0 effector molecule homolog OS=Homo sapiens OX=9606 GN=SRRT PE=1 SV=1	1	1	4	1	100.6	SRRT	-1.89156	0.0128086	0.178137
Q9H0A0	R0 cytidine acetyltransferase OS=Homo sapiens OX=9606 GN=0T10 PE=1 SV=2	3	3	7	3	115.7	0T10	-1.89652	0.0528056	0.302014
Q06787	Fragile X messenger ribonucleoprotein 1 OS=Homo sapiens OX=9606 GN=FMR1 PE=1 SV=1	9	5	9	5	71.1	FMR1	-1.89719	0.2087	0.507893
Q8IWX8	Calcium homeostasis endoplasmic reticulum protein OS=Homo sapiens OX=9606 GN=CHERP PE=1 SV=3	2	2	2	2	103.6	CHERP	-1.90825	0.302563	0.587292
Q15645	Pachytene checkpoint protein 2 homolog OS=Homo sapiens OX=9606 GN=TRIP13 PE=1 SV=2	2	1	2	1	48.5	TRIP13	-1.90949	0.0285347	0.253951
P43487	Ran-specific GTPase-activating protein OS=Homo sapiens OX=9606 GN=RANBP1 PE=1 SV=1	4	1	3	1	23.3	RANBP1	-1.92005	0.0659231	0.328904
P11177	Pyruvate dehydroge0se E1 component subunit beta, mitochondrial OS=Homo sapiens OX=9606 GN=PDHB PE=1 SV=3	11	3	7	3	39.2	PDHB	-1.92383	0.0675434	0.330319
Q96DA0	Zymogen granule protein 16 homolog B OS=Homo sapiens OX=9606 GN=ZG16B PE=1 SV=3	31	5	11	5	22.7	EECP	-1.92518	0.246582	0.554136
Q92890	Ubiquitin recognition factor in ER-associated degradation protein 1 OS=Homo sapiens OX=9606 GN=UFD1 PE=1 SV=3	3	1	2	1	34.5	UFD1	-1.92581	0.189191	0.491187
P42771	Cyclin-dependent ki0se inhibitor 2A OS=Homo sapiens OX=9606 GN=CDKN2A PE=1 SV=2	26	3	9	3	16.5	CDKN2A	-1.93367	0.0308985	0.260105
Q99496	E3 ubiquitin-protein ligase RING2 OS=Homo sapiens OX=9606 GN=RNF2 PE=1 SV=1	2	1	5	1	37.6	RNF2	-1.93797	0.0748652	0.347903
P46783	Small ribosomal subunit protein eS10 OS=Homo sapiens OX=9606 GN=RPS10 PE=1 SV=1	20	3	10	3	18.9	RPS10	-1.95601	0.0298738	0.25567
Q15390	Mitochondrial fission regulator 1 OS=Homo sapiens OX=9606 GN=MTFR1 PE=1 SV=2	4	1	1	1	37	MTFR1	-1.95815	0.209578	0.507893
Q9Y4C2	TRPM8 channel-associated factor 1 OS=Homo sapiens OX=9606 GN=TCAF1 PE=1 SV=3	2	2	6	2	102.1	TCAF1	-1.96073	0.0982982	0.38901
Q9Y2J2	Band 4.1-like protein 3 OS=Homo sapiens OX=9606 GN=EPB41L3 PE=1 SV=2	5	4	6	4	120.6	EPB41L3	-1.96276	0.188488	0.491187
P20700	Lamin-B1 OS=Homo sapiens OX=9606 GN=LMNB1 PE=1 SV=2	33	19	64	15	66.4	LMNB1	-1.9763	0.202666	0.504231
Q15149	Plectin OS=Homo sapiens OX=9606 GN=PLEC PE=1 SV=3	2	6	8	6	531.5	PLEC	-1.9801	0.325844	0.598195
Q12904	Aminoacyl tR0 synthase complex-interacting multifunctio0l protein 1 OS=Homo sapiens OX=9606 GN=AIMP1 PE=1 SV=2	15	3	4	3	34.3	AIMP1	-1.98291	0.178232	0.486664
P11441	Ubiquitin-like protein 4A OS=Homo sapiens OX=9606 GN=UBL4A PE=1 SV=1	17	3	6	3	17.8	UBL4A	-1.98605	0.145551	0.458529
O14980	Exportin-1 OS=Homo sapiens OX=9606 GN=XPO1 PE=1 SV=1	4	4	15	4	123.3	XPO1	-1.99246	0.131515	0.442838
Q13435	Splicing factor 3B subunit 2 OS=Homo sapiens OX=9606 GN=SF3B2 PE=1 SV=2	10	6	15	6	100.2	SF3B2	-1.99688	0.310196	0.589946
O95931	Chromobox protein homolog 7 OS=Homo sapiens OX=9606 GN=CBX7 PE=1 SV=1	3	1	24	1	28.3	CBX7	-2.00256	0.287929	0.581706
Q15386	Ubiquitin-protein ligase E3C OS=Homo sapiens OX=9606 GN=UBE3C PE=1 SV=3	1	2	2	2	123.8	UBE3C	-2.00545	0.0199939	0.236028
O15160	D0-directed R0 polymerases I and III subunit RPAC1 OS=Homo sapiens OX=9606 GN=POLR1C PE=1 SV=1	6	2	4	2	39.2	POLR1C	-2.00558	0.205288	0.50438
P49411	Elongation factor Tu, mitochondrial OS=Homo sapiens OX=9606 GN=TUFM PE=1 SV=3	49	18	90	18	49.8	TUFM	-2.00848	0.0725296	0.344852
Q4VCS5	Angiomotin OS=Homo sapiens OX=9606 GN=AMOT PE=1 SV=1	21	17	61	17	118	AMOT	-2.00853	0.069059	0.336131
Q9Y5K5	Ubiquitin carboxyl-termi0l hydrolase isozyme L5 OS=Homo sapiens OX=9606 GN=UCHL5 PE=1 SV=3	5	2	4	2	37.6	UCHL5	-2.00915	0.131263	0.442838
Q15942	Zyxin OS=Homo sapiens OX=9606 GN=ZYX PE=1 SV=1	10	3	4	3	61.2	ZYX	-2.01637	0.143671	0.458163
Q86X83	COMM domain-containing protein 2 OS=Homo sapiens OX=9606 GN=COMMD2 PE=1 SV=2	4	1	5	1	22.7	COMMD2	-2.01824	0.074721	0.347903
Q96DR8	Mucin-like protein 1 OS=Homo sapiens OX=9606 GN=MUCL1 PE=1 SV=1	8	1	1	1	9	MUCL1	-2.02011	0.0891079	0.370501
Q0VDF9	Heat shock 70 kDa protein 14 OS=Homo sapiens OX=9606 GN=HSPA14 PE=1 SV=1	19	6	7	6	54.8	HSPA14	-2.02303	0.18158	0.486664
P63208	S-phase ki0se-associated protein 1 OS=Homo sapiens OX=9606 GN=SKP1 PE=1 SV=2	7	1	4	1	18.6	SKP1	-2.04419	0.0201345	0.236028
P52434	D0-directed R0 polymerases I, II, and III subunit RPABC3 OS=Homo sapiens OX=9606 GN=POLR2H PE=1 SV=4	7	1	1	1	17.1	POLR2H	-2.05706	0.167101	0.486664
P62258	14-3-3 protein epsilon OS=Homo sapiens OX=9606 GN=YWHAE PE=1 SV=1	50	14	75	11	29.2	YWHAE	-2.06037	0.182712	0.486664
Q9Y3B7	Large ribosomal subunit protein uL11m OS=Homo sapiens OX=9606 GN=MRPL11 PE=1 SV=1	9	2	3	2	20.7	MRPL11	-2.06094	0.0349469	0.263553
P46379	Large proline-rich protein BAG6 OS=Homo sapiens OX=9606 GN=BAG6 PE=1 SV=2	3	3	3	3	119.3	BAG6	-2.0645	0.273834	0.566991
Q9NV31	U3 small nucleolar ribonucleoprotein protein IMP3 OS=Homo sapiens OX=9606 GN=IMP3 PE=1 SV=1	8	1	1	1	21.8	IMP3	-2.06642	0.0592251	0.316627
P68431	Histone H3.1 OS=Homo sapiens OX=9606 GN=H3C1 PE=1 SV=2	39	9	115	4	15.4	H3C1; H3C10; H3C11; H3C12; H3C2; H3C3; H3C4; H3C6; H3C7; H3C8	-2.06864	0.10875	0.40443
Q12905	Interleukin enhancer-binding factor 2 OS=Homo sapiens OX=9606 GN=ILF2 PE=1 SV=2	39	11	55	11	43	ILF2	-2.07115	0.184303	0.486664
Q9UKF6	Cleavage and polyadenylation specificity factor subunit 3 OS=Homo sapiens OX=9606 GN=CPSF3 PE=1 SV=1	2	1	1	1	77.4	CPSF3	-2.08476	0.115763	0.409962
P08238	Heat shock protein HSP 90-beta OS=Homo sapiens OX=9606 GN=HSP90AB1 PE=1 SV=4	34	24	238	12	83.2	HSP90AB1	-2.08659	0.0574005	0.310265
Q96C19	EF-hand domain-containing protein D2 OS=Homo sapiens OX=9606 GN=EFHD2 PE=1 SV=1	3	1	1	1	26.7	EFHD2	-2.08855	0.07427	0.347903
Q13813	Spectrin alpha chain, non-erythrocytic 1 OS=Homo sapiens OX=9606 GN=SPTAN1 PE=1 SV=3	0	1	1	1	284.4	SPTAN1	-2.09267	0.0316129	0.261107
P33991	D0 replication licensing factor MCM4 OS=Homo sapiens OX=9606 GN=MCM4 PE=1 SV=5	8	6	11	6	96.5	MCM4	-2.09712	0.151886	0.469841
Q6P5R6	Ribosomal protein eL22-like OS=Homo sapiens OX=9606 GN=RPL22L1 PE=1 SV=2	10	1	4	1	14.6	RPL22L1	-2.10449	0.0326469	0.262615
Q8IVF5	Rho guanine nucleotide exchange factor TIAM2 OS=Homo sapiens OX=9606 GN=TIAM2 PE=2 SV=4	0	1	3	1	190	TIAM2	-2.1052	0.0870566	0.367931
P46776	Large ribosomal subunit protein uL15 OS=Homo sapiens OX=9606 GN=RPL27A PE=1 SV=2	29	4	16	4	16.6	RPL27A	-2.11013	0.180118	0.486664
Q92900	Regulator of nonsense transcripts 1 OS=Homo sapiens OX=9606 GN=UPF1 PE=1 SV=2	9	9	17	9	124.3	UPF1	-2.11203	0.111332	0.405452
Q8NBT2	Kinetochore protein Spc24 OS=Homo sapiens OX=9606 GN=SPC24 PE=1 SV=3	4	1	2	1	22.4	SPC24	-2.12527	0.0529332	0.302014
P25705	ATP synthase subunit alpha, mitochondrial OS=Homo sapiens OX=9606 GN=ATP5F1A PE=1 SV=1	45	21	155	21	59.7	ATP5F1A	-2.13093	0.0537224	0.303148
P0DMV9	Heat shock 70 kDa protein 1B OS=Homo sapiens OX=9606 GN=HSPA1B PE=1 SV=1	55	37	325	32	70	HSPA1B	-2.13736	0.113357	0.406643
Q5H9R7	Serine/threonine-protein phosphatase 6 regulatory subunit 3 OS=Homo sapiens OX=9606 GN=PPP6R3 PE=1 SV=2	2	2	7	2	97.6	PPP6R3	-2.13824	0.0337274	0.263553
P62269	Small ribosomal subunit protein uS13 OS=Homo sapiens OX=9606 GN=RPS18 PE=1 SV=3	55	14	147	14	17.7	RPS18	-2.14037	0.048069	0.294892
P07197	Neurofilament medium polypeptide OS=Homo sapiens OX=9606 GN=NEFM PE=1 SV=3	15	13	51	9	102.4	NEFM	-2.15093	0.204617	0.50438
P52597	Heterogeneous nuclear ribonucleoprotein F OS=Homo sapiens OX=9606 GN=HNRNPF PE=1 SV=3	28	9	131	7	45.6	HNRNPF	-2.15372	0.26393	0.561114
P31040	Succi0te dehydroge0se [ubiquinone] flavoprotein subunit, mitochondrial OS=Homo sapiens OX=9606 GN=SDHA PE=1 SV=2	3	2	7	2	72.6	SDHA	-2.15444	0.162439	0.483549
Q8IX01	SURP and G-patch domain-containing protein 2 OS=Homo sapiens OX=9606 GN=SUGP2 PE=1 SV=2	6	5	8	5	120.1	SUGP2	-2.15483	0.131071	0.442838
P61513	Large ribosomal subunit protein eL43 OS=Homo sapiens OX=9606 GN=RPL37A PE=1 SV=2	10	1	1	1	10.3	RPL37A	-2.15913	0.102918	0.401358
P11274	Breakpoint cluster region protein OS=Homo sapiens OX=9606 GN=BCR PE=1 SV=2	3	3	3	3	142.7	BCR	-2.16315	0.0659903	0.328904
Q9UQN3	Charged multivesicular body protein 2b OS=Homo sapiens OX=9606 GN=CHMP2B PE=1 SV=1	5	1	3	1	23.9	CHMP2B	-2.16592	0.0560596	0.308397
Q8N6H7	ADP-ribosylation factor GTPase-activating protein 2 OS=Homo sapiens OX=9606 GN=ARFGAP2 PE=1 SV=1	2	1	3	1	56.7	ARFGAP2	-2.16603	0.0485265	0.294892
Q13283	Ras GTPase-activating protein-binding protein 1 OS=Homo sapiens OX=9606 GN=G3BP1 PE=1 SV=1	2	1	5	1	52.1	G3BP1	-2.18024	0.0458496	0.285379
P54577	Tyrosine--tR0 ligase, cytoplasmic OS=Homo sapiens OX=9606 GN=YARS1 PE=1 SV=4	3	2	2	2	59.1	YARS1	-2.18035	0.120412	0.421899
P28288	ATP-binding cassette sub-family D member 3 OS=Homo sapiens OX=9606 GN=ABCD3 PE=1 SV=1	7	4	5	4	75.4	ABCD3	-2.18925	0.140549	0.456785
Q9Y265	RuvB-like 1 OS=Homo sapiens OX=9606 GN=RUVBL1 PE=1 SV=1	23	8	38	8	50.2	RUVBL1	-2.19492	0.0658424	0.328904
P60891	Ribose-phosphate pyrophosphoki0se 1 OS=Homo sapiens OX=9606 GN=PRPS1 PE=1 SV=2	23	8	46	8	34.8	PRPS1	-2.1997	0.0200727	0.236028
P53680	AP-2 complex subunit sigma OS=Homo sapiens OX=9606 GN=AP2S1 PE=1 SV=2	5	1	1	1	17	AP2S1	-2.20601	0.0276456	0.253951
Q6SPF0	Sterile alpha motif domain-containing protein 1 OS=Homo sapiens OX=9606 GN=SAMD1 PE=1 SV=1	3	2	6	2	56	SAMD1	-2.21917	0.0614267	0.323393
O00743	Serine/threonine-protein phosphatase 6 catalytic subunit OS=Homo sapiens OX=9606 GN=PPP6C PE=1 SV=1	7	2	4	2	35.1	PPP6C	-2.22444	0.0285648	0.253951
Q9Y5A9	YTH domain-containing family protein 2 OS=Homo sapiens OX=9606 GN=YTHDF2 PE=1 SV=2	4	2	4	2	62.3	YTHDF2	-2.22668	0.179677	0.486664
Q6P1J9	Parafibromin OS=Homo sapiens OX=9606 GN=CDC73 PE=1 SV=1	16	8	14	8	60.5	CDC73	-2.22734	0.0823216	0.365374
Q5SW79	Centrosomal protein of 170 kDa OS=Homo sapiens OX=9606 GN=CEP170 PE=1 SV=1	1	2	7	2	175.2	CEP170	-2.2377	0.0617186	0.323393
Q8NFD4	Uncharacterized protein FLJ76381 OS=Homo sapiens OX=9606 PE=2 SV=1	5	1	1	1	17	0	-2.24157	0.0365755	0.264389
Q14671	Pumilio homolog 1 OS=Homo sapiens OX=9606 GN=PUM1 PE=1 SV=3	1	1	1	1	126.4	PUM1	-2.24206	0.171048	0.486664
Q13555	Calcium/calmodulin-dependent protein ki0se type II subunit gamma OS=Homo sapiens OX=9606 GN=CAMK2G PE=1 SV=4	8	4	12	2	62.6	CAMK2G	-2.24474	0.238211	0.542446
Q14739	Delta(14)-sterol reductase LBR OS=Homo sapiens OX=9606 GN=LBR PE=1 SV=2	6	3	8	3	70.7	LBR	-2.24649	0.0857856	0.367931
P31025	Lipocalin-1 OS=Homo sapiens OX=9606 GN=LCN1 PE=1 SV=1	21	4	33	4	19.2	LCN1	-2.25958	0.036184	0.263553
O14929	Histone acetyltransferase type B catalytic subunit OS=Homo sapiens OX=9606 GN=HAT1 PE=1 SV=2	2	1	1	1	49.5	HAT1	-2.26351	0.0520152	0.302014
Q6PGQ7	Protein aurora borealis OS=Homo sapiens OX=9606 GN=BORA PE=1 SV=2	2	1	3	1	61.2	BORA	-2.27931	0.10852	0.40443
P08574	Cytochrome c1, heme protein, mitochondrial OS=Homo sapiens OX=9606 GN=CYC1 PE=1 SV=3	4	1	5	1	35.4	CYC1	-2.28034	0.0358441	0.263553
Q9Y5Q9	General transcription factor 3C polypeptide 3 OS=Homo sapiens OX=9606 GN=GTF3C3 PE=1 SV=1	1	1	3	1	101.2	GTF3C3	-2.28579	0.0838061	0.366251
Q00325	Solute carrier family 25 member 3 OS=Homo sapiens OX=9606 GN=SLC25A3 PE=1 SV=2	21	8	40	8	40.1	SLC25A3	-2.29507	0.0326176	0.262615
P14678	Small nuclear ribonucleoprotein-associated proteins B and B' OS=Homo sapiens OX=9606 GN=SNRPB PE=1 SV=2	21	5	20	5	24.6	SNRPB	-2.31518	0.168479	0.486664
Q9H6R4	Nucleolar protein 6 OS=Homo sapiens OX=9606 GN=NOL6 PE=1 SV=2	3	4	22	4	127.5	NOL6	-2.35106	0.180627	0.486664
P05198	Eukaryotic translation initiation factor 2 subunit 1 OS=Homo sapiens OX=9606 GN=EIF2S1 PE=1 SV=3	6	2	3	2	36.1	EIF2S1	-2.36476	0.108699	0.40443
Q07021	Complement component 1 Q subcomponent-binding protein, mitochondrial OS=Homo sapiens OX=9606 GN=C1QBP PE=1 SV=1	26	4	8	4	31.3	C1QBP	-2.36593	0.0283358	0.253951
O75792	Ribonuclease H2 subunit A OS=Homo sapiens OX=9606 GN=R0SEH2A PE=1 SV=2	3	1	7	1	33.4	R0SEH2A	-2.37084	0.227462	0.526133
Q15365	Poly(rC)-binding protein 1 OS=Homo sapiens OX=9606 GN=PCBP1 PE=1 SV=2	44	10	65	7	37.5	PCBP1	-2.375	0.086663	0.367931
O00505	Importin subunit alpha-4 OS=Homo sapiens OX=9606 GN=KP03 PE=1 SV=2	1	1	5	1	57.8	KP03	-2.39437	0.250753	0.558618
Q96EY1	D0J homolog subfamily A member 3, mitochondrial OS=Homo sapiens OX=9606 GN=D0JA3 PE=1 SV=2	7	3	7	3	52.5	D0JA3	-2.39821	0.0720292	0.344065
P60866	Small ribosomal subunit protein uS10 OS=Homo sapiens OX=9606 GN=RPS20 PE=1 SV=1	25	3	46	3	13.4	RPS20	-2.40539	0.0832144	0.366251
P83731	Large ribosomal subunit protein eL24 OS=Homo sapiens OX=9606 GN=RPL24 PE=1 SV=1	30	5	34	5	17.8	RPL24	-2.4362	0.0419463	0.274677
P25205	D0 replication licensing factor MCM3 OS=Homo sapiens OX=9606 GN=MCM3 PE=1 SV=3	14	9	26	9	90.9	MCM3	-2.44097	0.0110616	0.175259
O00232	26S proteasome non-ATPase regulatory subunit 12 OS=Homo sapiens OX=9606 GN=PSMD12 PE=1 SV=3	4	2	8	2	52.9	PSMD12	-2.44714	0.0835437	0.366251
P0C0S5	Histone H2A.Z OS=Homo sapiens OX=9606 GN=H2AZ1 PE=1 SV=2	54	6	58	4	13.5	H2AZ1	-2.44969	0.194128	0.498543
P27635	Large ribosomal subunit protein uL16 OS=Homo sapiens OX=9606 GN=RPL10 PE=1 SV=5	49	13	99	13	24.6	RPL10	-2.4558	0.0642045	0.328904
Q9H0A8	COMM domain-containing protein 4 OS=Homo sapiens OX=9606 GN=COMMD4 PE=1 SV=1	24	3	6	3	21.8	COMMD4	-2.46586	0.0168138	0.208046
P62263	Small ribosomal subunit protein uS11 OS=Homo sapiens OX=9606 GN=RPS14 PE=1 SV=3	43	9	52	9	16.3	RPS14	-2.48018	0.0313889	0.261107
Q13257	Mitotic spindle assembly checkpoint protein MAD2A OS=Homo sapiens OX=9606 GN=MAD2L1 PE=1 SV=1	8	2	3	2	23.5	MAD2L1	-2.48037	0.139641	0.455274
Q9HB71	Calcyclin-binding protein OS=Homo sapiens OX=9606 GN=CACYBP PE=1 SV=2	7	2	8	2	26.2	CACYBP	-2.49032	0.0281045	0.253951
P15880	Small ribosomal subunit protein uS5 OS=Homo sapiens OX=9606 GN=RPS2 PE=1 SV=2	53	16	135	16	31.3	RPS2	-2.49069	0.0278319	0.253951
P57088	Transmembrane protein 33 OS=Homo sapiens OX=9606 GN=TMEM33 PE=1 SV=2	9	2	17	2	28	TMEM33	-2.51879	0.0532864	0.302349
Q10567	AP-1 complex subunit beta-1 OS=Homo sapiens OX=9606 GN=AP1B1 PE=1 SV=3	7	6	8	2	104.5	AP1B1	-2.52423	0.109591	0.40468
O00571	ATP-dependent R0 helicase DDX3X OS=Homo sapiens OX=9606 GN=DDX3X PE=1 SV=3	44	26	161	25	73.2	DDX3X	-2.52749	0.0561541	0.308397
P18085	ADP-ribosylation factor 4 OS=Homo sapiens OX=9606 GN=ARF4 PE=1 SV=3	43	6	23	3	20.5	ARF4	-2.56661	0.0540867	0.303536
P61026	Ras-related protein Rab-10 OS=Homo sapiens OX=9606 GN=RAB10 PE=1 SV=1	11	2	10	1	22.5	RAB10	-2.58165	0.0738251	0.347791
P30153	Serine/threonine-protein phosphatase 2A 65 kDa regulatory subunit A alpha isoform OS=Homo sapiens OX=9606 GN=PPP2R1A PE=1 SV=4	20	9	32	9	65.3	PPP2R1A	-2.58323	0.00845422	0.17365
Q13620	Cullin-4B OS=Homo sapiens OX=9606 GN=CUL4B PE=1 SV=4	9	9	16	9	103.9	CUL4B	-2.58832	0.0652967	0.328904
P12004	Proliferating cell nuclear antigen OS=Homo sapiens OX=9606 GN=PC0 PE=1 SV=1	27	7	23	7	28.8	PC0	-2.58916	0.0573939	0.310265
Q9BTY7	Protein HGH1 homolog OS=Homo sapiens OX=9606 GN=HGH1 PE=1 SV=1	17	5	10	5	42.1	HGH1	-2.61277	0.108796	0.40443
O75821	Eukaryotic translation initiation factor 3 subunit G OS=Homo sapiens OX=9606 GN=EIF3G PE=1 SV=2	18	5	11	5	35.6	EIF3G	-2.61786	0.0707822	0.342893
Q13613	Myotubularin-related protein 1 OS=Homo sapiens OX=9606 GN=MTMR1 PE=1 SV=4	2	2	3	2	74.6	MTMR1	-2.63513	0.0350726	0.263553
P62249	Small ribosomal subunit protein uS9 OS=Homo sapiens OX=9606 GN=RPS16 PE=1 SV=2	74	15	108	15	16.4	RPS16	-2.64908	0.0135112	0.182578
P08708	Small ribosomal subunit protein eS17 OS=Homo sapiens OX=9606 GN=RPS17 PE=1 SV=2	65	8	45	8	15.5	RPS17	-2.68013	0.026913	0.253951
Q9Y3D0	Cytosolic iron-sulfur assembly component 2B OS=Homo sapiens OX=9606 GN=CIAO2B PE=1 SV=1	31	3	7	3	17.7	CIAO2B	-2.69039	0.0385422	0.265152
Q9UJC3	Protein Hook homolog 1 OS=Homo sapiens OX=9606 GN=HOOK1 PE=1 SV=2	5	3	7	3	84.6	HOOK1	-2.70521	0.0289311	0.253951
Q9Y3F4	Serine-threonine ki0se receptor-associated protein OS=Homo sapiens OX=9606 GN=STRAP PE=1 SV=1	44	10	22	10	38.4	STRAP	-2.71941	0.021308	0.239853
O75746	Electrogenic aspartate/glutamate antiporter SLC25A12, mitochondrial OS=Homo sapiens OX=9606 GN=SLC25A12 PE=1 SV=2	13	9	33	3	74.7	SLC25A12	-2.72076	0.0317803	0.261107
P62701	Small ribosomal subunit protein eS4, X isoform OS=Homo sapiens OX=9606 GN=RPS4X PE=1 SV=2	58	18	88	18	29.6	RPS4X	-2.73249	0.0158333	0.20326
P56192	Methionine--tR0 ligase, cytoplasmic OS=Homo sapiens OX=9606 GN=MARS1 PE=1 SV=2	8	6	10	6	101.1	MARS1	-2.75289	0.0260334	0.253951
P11388	D0 topoisomerase 2-alpha OS=Homo sapiens OX=9606 GN=TOP2A PE=1 SV=3	9	13	36	9	174.3	TOP2A	-2.80462	0.123021	0.426835
Q3ZCQ8	Mitochondrial import inner membrane translocase subunit TIM50 OS=Homo sapiens OX=9606 GN=TIMM50 PE=1 SV=2	13	4	10	4	39.6	TIMM50	-2.82214	0.022819	0.25199
Q14103	Heterogeneous nuclear ribonucleoprotein D0 OS=Homo sapiens OX=9606 GN=HNRNPD PE=1 SV=1	19	6	29	4	38.4	HNRNPD	-2.82551	0.183478	0.486664
P60842	Eukaryotic initiation factor 4A-I OS=Homo sapiens OX=9606 GN=EIF4A1 PE=1 SV=1	48	15	78	14	46.1	EIF4A1	-2.84292	0.00894099	0.175259
Q13263	Transcription intermediary factor 1-beta OS=Homo sapiens OX=9606 GN=TRIM28 PE=1 SV=5	17	13	45	13	88.5	TRIM28	-2.8829	0.0524834	0.302014
Q9NXS2	Glutaminyl-peptide cyclotransferase-like protein OS=Homo sapiens OX=9606 GN=QPCTL PE=1 SV=2	10	4	13	4	42.9	QPCTL	-2.89164	0.0165852	0.208046
Q14157	Ubiquitin-associated protein 2-like OS=Homo sapiens OX=9606 GN=UBAP2L PE=1 SV=2	5	4	15	4	114.5	UBAP2L	-2.91889	0.0866366	0.367931
P62854	Small ribosomal subunit protein eS26 OS=Homo sapiens OX=9606 GN=RPS26 PE=1 SV=3	40	4	30	4	13	RPS26	-2.93375	0.142512	0.458163
Q7Z2W4	Zinc finger CCCH-type antiviral protein 1 OS=Homo sapiens OX=9606 GN=ZC3HAV1 PE=1 SV=3	6	5	16	5	101.4	ZC3HAV1	-2.9341	0.0445992	0.281002
Q9UHD1	Cysteine and histidine-rich domain-containing protein 1 OS=Homo sapiens OX=9606 GN=CHORDC1 PE=1 SV=2	9	3	6	3	37.5	CHORDC1	-2.95383	0.0266535	0.253951
Q13155	Aminoacyl tR0 synthase complex-interacting multifunctio0l protein 2 OS=Homo sapiens OX=9606 GN=AIMP2 PE=1 SV=2	3	1	7	1	35.3	AIMP2	-2.95437	0.0380079	0.265152
Q3KQU3	MAP7 domain-containing protein 1 OS=Homo sapiens OX=9606 GN=MAP7D1 PE=1 SV=1	5	4	7	4	92.8	MAP7D1	-2.9554	0.0889235	0.370501
P05141	ADP/ATP translocase 2 OS=Homo sapiens OX=9606 GN=SLC25A5 PE=1 SV=7	44	15	199	3	32.8	SLC25A5	-2.95769	0.0143645	0.187828
P30876	D0-directed R0 polymerase II subunit RPB2 OS=Homo sapiens OX=9606 GN=POLR2B PE=1 SV=1	10	10	23	10	133.8	POLR2B	-2.9954	0.0867924	0.367931
A0A075B6R9	Probable non-functio0l immunoglobulin kappa variable 2D-24 OS=Homo sapiens OX=9606 GN=IGKV2D-24 PE=1 SV=1	27	6	280	5	13.1	IGKV2D-24	-3.001	0.0428721	0.276916
Q14498	R0-binding protein 39 OS=Homo sapiens OX=9606 GN=RBM39 PE=1 SV=2	25	10	54	10	59.3	RBM39	-3.0066	0.0234619	0.253951
Q9NVA2	Septin-11 OS=Homo sapiens OX=9606 GN=SEPTIN11 PE=1 SV=3	11	5	13	3	49.4	SEPTIN11	-3.07828	0.0484665	0.294892
P43307	Translocon-associated protein subunit alpha OS=Homo sapiens OX=9606 GN=SSR1 PE=1 SV=3	7	2	6	2	32.2	SSR1	-3.07963	0.0371613	0.265033
Q9H078	Mitochondrial disaggregase OS=Homo sapiens OX=9606 GN=CLPB PE=1 SV=1	8	5	8	5	78.7	CLPB	-3.0925	0.0246278	0.253951
P52292	Importin subunit alpha-1 OS=Homo sapiens OX=9606 GN=KP02 PE=1 SV=1	26	11	68	11	57.8	KP02	-3.10627	0.0295293	0.255423
Q96T51	RUN and FYVE domain-containing protein 1 OS=Homo sapiens OX=9606 GN=RUFY1 PE=1 SV=2	1	1	3	1	79.8	RUFY1	-3.11511	0.209685	0.507893
P55884	Eukaryotic translation initiation factor 3 subunit B OS=Homo sapiens OX=9606 GN=EIF3B PE=1 SV=3	8	6	14	6	92.4	EIF3B	-3.12385	0.0666135	0.328904
P08865	Small ribosomal subunit protein uS2 OS=Homo sapiens OX=9606 GN=RPSA PE=1 SV=4	32	7	43	7	32.8	RPSA	-3.13296	0.180568	0.486664
P33992	D0 replication licensing factor MCM5 OS=Homo sapiens OX=9606 GN=MCM5 PE=1 SV=5	17	10	36	10	82.2	MCM5	-3.13893	0.0766853	0.350958
P57678	Gem-associated protein 4 OS=Homo sapiens OX=9606 GN=GEMIN4 PE=1 SV=2	5	5	17	5	120	GEMIN4	-3.15351	0.0825381	0.365374
O43852	Calumenin OS=Homo sapiens OX=9606 GN=CALU PE=1 SV=2	29	8	28	8	37.1	CALU	-3.15697	0.0112639	0.175259
P62280	Small ribosomal subunit protein uS17 OS=Homo sapiens OX=9606 GN=RPS11 PE=1 SV=3	58	12	85	12	18.4	RPS11	-3.19559	0.00564706	0.140491
O60762	Dolichol-phosphate mannosyltransferase subunit 1 OS=Homo sapiens OX=9606 GN=DPM1 PE=1 SV=1	19	3	8	3	29.6	DPM1	-3.20038	0.0389633	0.265152
Q9H9B4	Sideroflexin-1 OS=Homo sapiens OX=9606 GN=SFXN1 PE=1 SV=4	17	5	20	5	35.6	SFXN1	-3.22754	0.0209747	0.239344
O43318	Mitogen-activated protein ki0se ki0se ki0se 7 OS=Homo sapiens OX=9606 GN=MAP3K7 PE=1 SV=1	7	5	11	5	67.2	MAP3K7	-3.22855	0.0348257	0.263553
Q9NZ01	Very-long-chain enoyl-CoA reductase OS=Homo sapiens OX=9606 GN=TECR PE=1 SV=1	12	4	9	4	36	TECR	-3.25244	0.0498286	0.296028
Q9Y285	Phenylalanine--tR0 ligase alpha subunit OS=Homo sapiens OX=9606 GN=FARSA PE=1 SV=3	28	10	51	10	57.5	FARSA	-3.27207	0.062037	0.323411
Q15366	Poly(rC)-binding protein 2 OS=Homo sapiens OX=9606 GN=PCBP2 PE=1 SV=1	25	7	50	4	38.6	PCBP2	-3.30378	0.0674736	0.330319
P05023	Sodium/potassium-transporting ATPase subunit alpha-1 OS=Homo sapiens OX=9606 GN=ATP1A1 PE=1 SV=1	14	11	36	11	112.8	ATP1A1	-3.30924	0.0783371	0.354415
P51610	Host cell factor 1 OS=Homo sapiens OX=9606 GN=HCFC1 PE=1 SV=2	7	9	17	9	208.6	HCFC1	-3.30984	0.0419905	0.274677
Q9Y4W2	Ribosomal biogenesis protein LAS1L OS=Homo sapiens OX=9606 GN=LAS1L PE=1 SV=2	9	5	13	5	83	LAS1L	-3.31307	0.00472455	0.140491
Q15029	116 kDa U5 small nuclear ribonucleoprotein component OS=Homo sapiens OX=9606 GN=EFTUD2 PE=1 SV=1	16	13	45	12	109.4	EFTUD2	-3.34534	0.133927	0.443689
Q15773	Myeloid leukemia factor 2 OS=Homo sapiens OX=9606 GN=MLF2 PE=1 SV=1	15	4	9	4	28.1	MLF2	-3.35455	0.0432673	0.277722
Q13885	Tubulin beta-2A chain OS=Homo sapiens OX=9606 GN=TUBB2A PE=1 SV=1	67	27	721	1	49.9	TUBB2A	-3.37841	0.213436	0.511971
P21796	Voltage-dependent anion-selective channel protein 1 OS=Homo sapiens OX=9606 GN=VDAC1 PE=1 SV=2	19	5	14	4	30.8	VDAC1	-3.40773	0.0347473	0.263553
Q9BQ67	Glutamate-rich WD repeat-containing protein 1 OS=Homo sapiens OX=9606 GN=GRWD1 PE=1 SV=1	15	5	20	5	49.4	GRWD1	-3.42888	0.0555729	0.308397
Q9BVA1	Tubulin beta-2B chain OS=Homo sapiens OX=9606 GN=TUBB2B PE=1 SV=1	67	27	724	1	49.9	TUBB2B	-3.4413	0.0113699	0.175259
P62979	Ubiquitin-ribosomal protein eS31 fusion protein OS=Homo sapiens OX=9606 GN=RPS27A PE=1 SV=2	46	11	322	11	18	RPS27A	-3.45779	0.00974516	0.175259
P60228	Eukaryotic translation initiation factor 3 subunit E OS=Homo sapiens OX=9606 GN=EIF3E PE=1 SV=1	12	6	14	6	52.2	EIF3E	-3.45781	0.00431935	0.140491
Q9NVI7	ATPase family AAA domain-containing protein 3A OS=Homo sapiens OX=9606 GN=ATAD3A PE=1 SV=2	6	4	12	4	71.3	ATAD3A	-3.46091	0.0334549	0.263553
P23396	Small ribosomal subunit protein uS3 OS=Homo sapiens OX=9606 GN=RPS3 PE=1 SV=2	87	29	313	29	26.7	RPS3	-3.47493	0.0121778	0.175259
P27348	14-3-3 protein theta OS=Homo sapiens OX=9606 GN=YWHAQ PE=1 SV=1	47	11	74	5	27.7	YWHAQ	-3.49634	0.0295963	0.255423
P62851	Small ribosomal subunit protein eS25 OS=Homo sapiens OX=9606 GN=RPS25 PE=1 SV=1	28	4	21	4	13.7	RPS25	-3.51462	0.100371	0.394947
P35606	Coatomer subunit beta' OS=Homo sapiens OX=9606 GN=COPB2 PE=1 SV=2	14	10	18	10	102.4	COPB2	-3.52903	0.0204346	0.236028
P52789	Hexoki0se-2 OS=Homo sapiens OX=9606 GN=HK2 PE=1 SV=2	3	3	6	3	102.3	HK2	-3.54135	0.0368137	0.264389
P07437	Tubulin beta chain OS=Homo sapiens OX=9606 GN=TUBB PE=1 SV=2	67	28	918	5	49.6	TUBB	-3.61005	0.0440933	0.27953
Q8N163	Cell cycle and apoptosis regulator protein 2 OS=Homo sapiens OX=9606 GN=CCAR2 PE=1 SV=2	11	10	18	10	102.8	CCAR2	-3.61838	0.0424899	0.276184
Q9UBX3	Mitochondrial dicarboxylate carrier OS=Homo sapiens OX=9606 GN=SLC25A10 PE=1 SV=2	18	4	14	4	31.3	SLC25A10	-3.61886	0.012113	0.175259
O95793	Double-stranded R0-binding protein Staufen homolog 1 OS=Homo sapiens OX=9606 GN=STAU1 PE=1 SV=2	9	5	9	5	63.1	STAU1	-3.61948	0.0167627	0.208046
Q8IWC1	MAP7 domain-containing protein 3 OS=Homo sapiens OX=9606 GN=MAP7D3 PE=1 SV=2	2	2	5	2	98.4	MAP7D3	-3.63375	0.0282435	0.253951
Q9Y230	RuvB-like 2 OS=Homo sapiens OX=9606 GN=RUVBL2 PE=1 SV=3	27	10	39	10	51.1	RUVBL2	-3.64934	0.027354	0.253951
Q8N257	Histone H2B type 3-B OS=Homo sapiens OX=9606 GN=H2BC26 PE=1 SV=3	64	12	170	2	13.9	H2BC26	-3.82314	0.0984835	0.38901
O60884	D0J homolog subfamily A member 2 OS=Homo sapiens OX=9606 GN=D0JA2 PE=1 SV=1	12	6	15	6	45.7	D0JA2	-3.84466	0.00404845	0.140491
P45880	Voltage-dependent anion-selective channel protein 2 OS=Homo sapiens OX=9606 GN=VDAC2 PE=1 SV=2	39	8	37	8	31.5	VDAC2	-3.84806	0.00740282	0.161759
Q13501	Sequestosome-1 OS=Homo sapiens OX=9606 GN=SQSTM1 PE=1 SV=1	13	4	10	4	47.7	SQSTM1	-3.85429	0.0214863	0.239853
P07814	Bifunctio0l glutamate/proline--tR0 ligase OS=Homo sapiens OX=9606 GN=EPRS1 PE=1 SV=5	8	11	34	11	170.5	EPRS1	-3.86738	0.0400181	0.265152
O43491	Band 4.1-like protein 2 OS=Homo sapiens OX=9606 GN=EPB41L2 PE=1 SV=1	4	3	9	3	112.5	EPB41L2	-3.88033	0.0594142	0.316627
P33993	D0 replication licensing factor MCM7 OS=Homo sapiens OX=9606 GN=MCM7 PE=1 SV=4	25	14	60	14	81.3	MCM7	-3.88204	0.00978032	0.175259
Q92598	Heat shock protein 105 kDa OS=Homo sapiens OX=9606 GN=HSPH1 PE=1 SV=1	17	11	30	10	96.8	HSPH1	-3.91938	0.00921098	0.175259
Q15019	Septin-2 OS=Homo sapiens OX=9606 GN=SEPTIN2 PE=1 SV=1	22	6	18	6	41.5	SEPTIN2	-3.95045	0.0118101	0.175259
Q13347	Eukaryotic translation initiation factor 3 subunit I OS=Homo sapiens OX=9606 GN=EIF3I PE=1 SV=1	22	7	20	7	36.5	EIF3I	-3.98421	0.00996992	0.175259
O14654	Insulin receptor substrate 4 OS=Homo sapiens OX=9606 GN=IRS4 PE=1 SV=1	17	18	64	18	133.7	IRS4	-4.03276	0.0261364	0.253951
Q9H0U3	Magnesium transporter protein 1 OS=Homo sapiens OX=9606 GN=MAGT1 PE=1 SV=1	5	2	3	2	38	MAGT1	-4.04829	0.0359831	0.263553
Q99615	D0J homolog subfamily C member 7 OS=Homo sapiens OX=9606 GN=D0JC7 PE=1 SV=2	13	7	24	7	56.4	D0JC7	-4.08096	0.0039489	0.140491
P12236	ADP/ATP translocase 3 OS=Homo sapiens OX=9606 GN=SLC25A6 PE=1 SV=4	40	14	169	2	32.8	SLC25A6	-4.13538	0.0288487	0.253951
P42677	Small ribosomal subunit protein eS27 OS=Homo sapiens OX=9606 GN=RPS27 PE=1 SV=3	25	2	12	2	9.5	RPS27	-4.13876	0.0102864	0.175259
P53618	Coatomer subunit beta OS=Homo sapiens OX=9606 GN=COPB1 PE=1 SV=3	11	9	20	9	107.1	COPB1	-4.15891	0.00829072	0.17365
Q7KZF4	Staphylococcal nuclease domain-containing protein 1 OS=Homo sapiens OX=9606 GN=SND1 PE=1 SV=1	11	9	22	9	101.9	SND1	-4.17064	0.00607004	0.14168
P23381	Tryptophan--tR0 ligase, cytoplasmic OS=Homo sapiens OX=9606 GN=WARS1 PE=1 SV=2	24	8	15	8	53.1	WARS1	-4.18602	0.00571215	0.140491
P50402	Emerin OS=Homo sapiens OX=9606 GN=EMD PE=1 SV=1	31	8	28	8	29	EMD	-4.2099	0.00516228	0.140491
Q9BUF5	Tubulin beta-6 chain OS=Homo sapiens OX=9606 GN=TUBB6 PE=1 SV=1	32	14	343	4	49.8	TUBB6	-4.29689	0.00289301	0.140491
Q8N1F7	Nuclear pore complex protein Nup93 OS=Homo sapiens OX=9606 GN=NUP93 PE=1 SV=2	16	11	23	11	93.4	NUP93	-4.29971	0.0257771	0.253951
Q15750	TGF-beta-activated ki0se 1 and MAP3K7-binding protein 1 OS=Homo sapiens OX=9606 GN=TAB1 PE=1 SV=1	28	11	29	11	54.6	TAB1	-4.3066	0.0196721	0.236028
Q15008	26S proteasome non-ATPase regulatory subunit 6 OS=Homo sapiens OX=9606 GN=PSMD6 PE=1 SV=1	19	7	16	7	45.5	PSMD6	-4.36798	0.00643959	0.145249
P54136	Arginine--tR0 ligase, cytoplasmic OS=Homo sapiens OX=9606 GN=RARS1 PE=1 SV=2	26	17	47	17	75.3	RARS1	-4.37696	0.00394345	0.140491
O75534	Cold shock domain-containing protein E1 OS=Homo sapiens OX=9606 GN=CSDE1 PE=1 SV=2	21	17	44	17	88.8	CSDE1	-4.50893	0.00329176	0.140491
Q9UHD8	Septin-9 OS=Homo sapiens OX=9606 GN=SEPTIN9 PE=1 SV=2	16	9	20	9	65.4	SEPTIN9	-4.53961	0.00650578	0.145249
P47897	Glutamine--tR0 ligase OS=Homo sapiens OX=9606 GN=QARS1 PE=1 SV=1	19	13	35	13	87.7	QARS1	-4.59978	0.00482152	0.140491
Q04323	UBX domain-containing protein 1 OS=Homo sapiens OX=9606 GN=UBXN1 PE=1 SV=2	18	4	8	4	33.3	UBXN1	-4.60286	0.00371256	0.140491
O75190	D0J homolog subfamily B member 6 OS=Homo sapiens OX=9606 GN=D0JB6 PE=1 SV=2	10	3	7	2	36.1	D0JB6	-4.60999	0.0266027	0.253951
Q9Y678	Coatomer subunit gamma-1 OS=Homo sapiens OX=9606 GN=COPG1 PE=1 SV=1	7	6	15	4	97.7	COPG1	-4.61116	0.00970865	0.175259
P36542	ATP synthase subunit gamma, mitochondrial OS=Homo sapiens OX=9606 GN=ATP5F1C PE=1 SV=1	31	10	44	10	33	ATP5F1C	-4.62217	0.00525509	0.140491
P62829	Large ribosomal subunit protein uL14 OS=Homo sapiens OX=9606 GN=RPL23 PE=1 SV=1	56	8	39	8	14.9	RPL23	-4.69707	0.00783462	0.167628
Q99623	Prohibitin-2 OS=Homo sapiens OX=9606 GN=PHB2 PE=1 SV=2	46	12	39	12	33.3	PHB2	-4.7137	0.00585663	0.140491
Q5JWF2	Guanine nucleotide-binding protein G(s) subunit alpha isoforms XLas OS=Homo sapiens OX=9606 GN=G0S PE=1 SV=2	8	8	27	7	111	G0S	-4.73285	0.0114248	0.175259
P53007	Tricarboxylate transport protein, mitochondrial OS=Homo sapiens OX=9606 GN=SLC25A1 PE=1 SV=2	26	8	15	8	34	SLC25A1	-4.75916	0.0040421	0.140491
Q13557	Calcium/calmodulin-dependent protein ki0se type II subunit delta OS=Homo sapiens OX=9606 GN=CAMK2D PE=1 SV=3	13	6	16	4	56.3	CAMK2D	-4.80076	0.00500135	0.140491
O95831	Apoptosis-inducing factor 1, mitochondrial OS=Homo sapiens OX=9606 GN=AIFM1 PE=1 SV=1	20	11	29	11	66.9	AIFM1	-4.80753	0.00920136	0.175259
P48444	Coatomer subunit delta OS=Homo sapiens OX=9606 GN=ARCN1 PE=1 SV=1	16	8	17	8	57.2	ARCN1	-4.82377	0.0055435	0.140491
Q9Y2X9	Zinc finger protein 281 OS=Homo sapiens OX=9606 GN=ZNF281 PE=1 SV=1	4	3	5	3	96.9	ZNF281	-4.84226	0.0436381	0.278362
Q02978	Mitochondrial 2-oxoglutarate/malate carrier protein OS=Homo sapiens OX=9606 GN=SLC25A11 PE=1 SV=3	44	11	63	11	34	SLC25A11	-4.84473	0.00317516	0.140491
P04350	Tubulin beta-4A chain OS=Homo sapiens OX=9606 GN=TUBB4A PE=1 SV=2	60	22	640	1	49.6	TUBB4A	-4.84704	0.0250412	0.253951
P53621	Coatomer subunit alpha OS=Homo sapiens OX=9606 GN=COPA PE=1 SV=2	14	15	35	15	138.3	COPA	-4.86337	0.0128356	0.178137
Q14257	Reticulocalbin-2 OS=Homo sapiens OX=9606 GN=RCN2 PE=1 SV=1	35	8	28	8	36.9	RCN2	-4.8793	0.0109234	0.175259
Q16576	Histone-binding protein RBBP7 OS=Homo sapiens OX=9606 GN=RBBP7 PE=1 SV=1	24	10	28	10	47.8	RBBP7	-4.93309	0.00125322	0.140023
O95816	BAG family molecular chaperone regulator 2 OS=Homo sapiens OX=9606 GN=BAG2 PE=1 SV=1	39	7	23	7	23.8	BAG2	-4.96333	0.00200542	0.140491
P14868	Aspartate--tR0 ligase, cytoplasmic OS=Homo sapiens OX=9606 GN=DARS1 PE=1 SV=2	33	16	60	16	57.1	DARS1	-5.00886	0.00400569	0.140491
P83111	Serine beta-lactamase-like protein LACTB, mitochondrial OS=Homo sapiens OX=9606 GN=LACTB PE=1 SV=2	13	6	13	6	60.7	LACTB	-5.04871	0.000963491	0.140023
E9PAV3	0scent polypeptide-associated complex subunit alpha, muscle-specific form OS=Homo sapiens OX=9606 GN=0CA PE=1 SV=1	2	3	18	3	205.3	0CA	-5.12987	0.0031124	0.140491
P31689	D0J homolog subfamily A member 1 OS=Homo sapiens OX=9606 GN=D0JA1 PE=1 SV=2	30	8	44	8	44.8	D0JA1	-5.51884	0.00432011	0.140491
O43242	26S proteasome non-ATPase regulatory subunit 3 OS=Homo sapiens OX=9606 GN=PSMD3 PE=1 SV=2	49	24	102	24	60.9	PSMD3	-5.70044	0.000955427	0.140023
P27708	CAD protein OS=Homo sapiens OX=9606 GN=CAD PE=1 SV=3	16	29	79	26	242.8	CAD	-5.83929	0.0122499	0.175259
P41252	Isoleucine--tR0 ligase, cytoplasmic OS=Homo sapiens OX=9606 GN=IARS1 PE=1 SV=2	18	20	70	20	144.4	IARS1	-5.84902	0.00588229	0.140491
Q00341	Vigilin OS=Homo sapiens OX=9606 GN=HDLBP PE=1 SV=2	18	21	53	21	141.4	0	-6.04029	0.00486216	0.140491
Q9UJS0	Electrogenic aspartate/glutamate antiporter SLC25A13, mitochondrial OS=Homo sapiens OX=9606 GN=SLC25A13 PE=1 SV=2	38	22	78	16	74.1	SLC25A13	-6.19392	0.0014514	0.140023
Q04637	Eukaryotic translation initiation factor 4 gamma 1 OS=Homo sapiens OX=9606 GN=EIF4G1 PE=1 SV=4	15	22	69	22	175.4	EIF4G1	-6.40928	0.00490205	0.140491
Q9UNF1	Melanoma-associated antigen D2 OS=Homo sapiens OX=9606 GN=MAGED2 PE=1 SV=2	30	17	54	17	64.9	MAGED2	-6.47034	0.00167254	0.140023
P04792	Heat shock protein beta-1 OS=Homo sapiens OX=9606 GN=HSPB1 PE=1 SV=2	44	8	32	8	22.8	HSPB1	-6.71459	0.00453509	0.140491
P20132	L-serine dehydratase/L-threonine deami0se OS=Homo sapiens OX=9606 GN=SDS PE=1 SV=2	3	1	3	1	34.6	SDS	-6.87888	0.00177244	0.140023
O00165	HCLS1-associated protein X-1 OS=Homo sapiens OX=9606 GN=HAX1 PE=1 SV=2	59	15	51	15	31.6	HAX1	-7.56004	0.00152838	0.140023
Q9BQE3	Tubulin alpha-1C chain OS=Homo sapiens OX=9606 GN=TUBA1C PE=1 SV=1	69	30	598	3	49.9	TUBA1C	-8.47666	0.000375503	0.140023
Q71U36	Tubulin alpha-1A chain OS=Homo sapiens OX=9606 GN=TUBA1A PE=1 SV=1	69	30	571	2	50.1	TUBA1A	-8.81377	0.0304306	0.258283
